# Supplementary material for: Small RNA Changes in Plasma Have Potential for Early Diagnosis of Alzheimer’s Disease before Symptom Onset
Source: Cells. 2024 Jan 23;13(3):207. doi: 10.3390/cells13030207 (PMC10854972; doi:10.3390/cells13030207)
Supplement: Supplementary file 1 [file cells-13-00207-s001.zip]

Archive with 8 entries (8 files):
- Supplemental table S1 Sample metadata.xlsx
- Supplemental table S2 Gene ID look-up table.csv
- Supplemental table S3 EV-enriched vs EV-depleted fraction of reads.xlsx
- Supplemental table S4 DEG tables all comparisons.xlsx
- Supplemental table S5 ELNET metrics and sequences used.xlsx
- Supplemental table S6 LRM metrics.xlsx
- Supplemental table S7 Linear regression converters.xlsx
- supplementary figures.pdf
