# Supplementary material for: Small RNA Changes in Plasma Have Potential for Early Diagnosis of Alzheimer’s Disease before Symptom Onset
Source: Cells. 2024 Jan 23;13(3):207. doi: 10.3390/cells13030207 (PMC10854972; doi:10.3390/cells13030207)
Supplement: Supplementary file 1 [file cells-13-00207-s001.zip › Supplemental table S1 Sample metadata.xlsx]

## Sheet: Manifest
Sample ID	EV-enriched fraction sequenced?	EV-enriched fraction met 1e6 mapping reads criteria?	EV-depleted fraction sequenced?	EV-depleted fraction met 1e6 mapping reads criteria?	Age at draw	Sex	APOE	MMSE at draw	DRS at draw	DX at draw	DX post draw	Disease progression occured?	Years elapsed between draw and new disease DX	Post mortem analysis conducted?	Years elapsed between draw and autopsy	Braak stage at autopsy	Post mortem DX (Primary)	Exclusion from analysis?
2408_2000	yes	yes	yes	no	70	M	34	29	137	Control	MCI	yes	6	no	n/a	n/a	n/a
2542_2001	yes	yes	yes	yes	80	F	34	30	134	Control	AD	yes	4	no	n/a	n/a	n/a
2558_2001	yes	yes	yes	no	79	F	33	29	142	Control	MCI	yes	6	no	n/a	n/a	n/a
2611_2002	yes	yes	no	n/a	65	M	34	30	143	Control	MCI	yes	4	no	n/a	n/a	n/a
2727_2000	yes	yes	no	n/a	73	F	34	26	140	Control	MCI	yes	1	no	n/a	n/a	n/a
2820_2001	yes	yes	no	n/a	74	F	33	30	140	Control	AD	yes	12	no	n/a	n/a	n/a
2889_2002	yes	yes	no	n/a	75	F	33	29	138	Control	MCI	yes	4	no	n/a	n/a	n/a
3210_2010	yes	yes	yes	yes	84	F	33	28	144	Control	AD	yes	11	no	n/a	n/a	n/a
2407_2006	yes	yes	yes	yes	67	M	33	30	135	Control	Control	no	n/a	no	n/a	n/a	n/a	Exclude; PART-associated according to model (figure 2)
2423_2002	yes	yes	no	n/a	90	M	34	30	137	Control	Control	no	n/a	no	n/a	n/a	n/a
2491_2002	yes	yes	no	n/a	81	F	33	30	138	Control	Control	no	n/a	no	n/a	n/a	n/a
2544_2003	yes	yes	no	n/a	60	F	33	28	144	Control	Control	no	n/a	no	n/a	n/a	n/a
2559_2001	yes	yes	no	n/a	84	M	33	28	138	MCI	MCI	no	n/a	no	n/a	n/a	n/a
2578_2001	yes	yes	no	n/a	80	M	23	30	136	Control	Control	no	n/a	no	n/a	n/a	n/a
2585_2002	yes	yes	yes	no	61	F	33	28	129	MCI	MCI	no	n/a	no	n/a	n/a	n/a
2589_2004	yes	yes	no	n/a	64	F	34	28	141	Control	Control	no	n/a	no	n/a	n/a	n/a
2590_2001	yes	yes	yes	yes	67	F	33	30	142	Control	Control	no	n/a	no	n/a	n/a	n/a
2598_2005	yes	yes	no	n/a	66	M	34	30	140	Control	Control	no	n/a	no	n/a	n/a	n/a	Exclude; PART-associated according to model (figure 2)
2628_2001	yes	yes	yes	yes	64	F	34	29	140	Control	Control	no	n/a	no	n/a	n/a	n/a
2645_2001	yes	yes	no	n/a	60	M	34	30	143	Control	Control	no	n/a	no	n/a	n/a	n/a	Exclude; PART-associated according to model (figure 2)
2652_2001	yes	yes	no	n/a	83	F	33	9	93	AD	AD	no	n/a	no	n/a	n/a	n/a
2663_2001	yes	yes	yes	no	77	F	34	29	140	Control	Control	no	n/a	no	n/a	n/a	n/a
2664_2002	yes	yes	yes	no	40	F	33	30	141	Control	Control	no	n/a	no	n/a	n/a	n/a
2667_2002	yes	yes	no	n/a	78	M	34	28	118	AD	AD	no	n/a	no	n/a	n/a	n/a
2689_2001	yes	yes	no	n/a	64	F	33	29	133	MCI	AD	yes	1	no	n/a	n/a	n/a
2719_2001	yes	yes	yes	yes	74	M	44	16	90	AD	AD	no	n/a	no	n/a	n/a	n/a
2728_2001	yes	yes	yes	no	74	F	33	27	132	MCI	AD	yes	2	no	n/a	n/a	n/a
2746_2000	yes	yes	yes	yes	70	M	34	20	106	AD	AD	no	n/a	no	n/a	n/a	n/a
2764_2004	yes	yes	yes	yes	68	M	33	30	142	Control	Control	no	n/a	no	n/a	n/a	n/a
2767_2002	yes	yes	yes	yes	81	F	33	29	125	MCI	AD	yes	1	no	n/a	n/a	n/a
2784_2001	yes	yes	yes	no	53	M	33	17	91	AD	AD	no	n/a	no	n/a	n/a	n/a
2789_2002	yes	yes	no	n/a	60	F	33	29	138	Control	Control	no	n/a	no	n/a	n/a	n/a	Exclude; PART-associated according to model (figure 2)
2799_2001	yes	yes	no	n/a	75	M	34	30	143	Control	Control	no	n/a	no	n/a	n/a	n/a
2805_2003	yes	yes	yes	yes	71	F	34	30	143	Control	Control	no	n/a	no	n/a	n/a	n/a
2822_2002	yes	yes	yes	yes	71	M	34	30	141	MCI	MCI	no	n/a	no	n/a	n/a	n/a
2823_2001	yes	yes	no	n/a	82	F	24	24	128	AD	AD	no	n/a	no	n/a	n/a	n/a
2827_2001	yes	yes	no	n/a	71	F	34	27	131	AD	AD	no	n/a	no	n/a	n/a	n/a
2868_2001	yes	yes	yes	no	75	F	34	24	122	AD	AD	no	n/a	no	n/a	n/a	n/a
2907_2006	yes	yes	no	n/a	69	M	33	29	138	Control	Control	no	n/a	no	n/a	n/a	n/a	Exclude; PART-associated according to model (figure 2)
2926_2003	yes	yes	yes	yes	67	M	34	28	133	Control	Control	no	n/a	no	n/a	n/a	n/a
2943_2004	yes	yes	yes	no	81	M	33	28	138	MCI	MCI	no	n/a	no	n/a	n/a	n/a
2964_2008	yes	yes	yes	no	83	M	34	30	141	Control	Control	no	n/a	no	n/a	n/a	n/a	Exclude; PART-associated according to model (figure 2)
2968_2005	yes	yes	yes	yes	67	F	34	29	131	MCI	MCI	no	n/a	no	n/a	n/a	n/a
3005_2007	yes	yes	yes	yes	77	M	33	30	138	MCI	MCI	no	n/a	no	n/a	n/a	n/a
3028_2008	yes	yes	yes	yes	71	F	34	29	133	MCI	MCI	no	n/a	no	n/a	n/a	n/a
3047_2009	yes	yes	no	n/a	60	F	23	30	141	Control	Control	no	n/a	no	n/a	n/a	n/a
3056_2011	yes	yes	yes	yes	83	M	33	29	138	Control	Control	no	n/a	no	n/a	n/a	n/a
3075_2011	yes	yes	yes	no	84	F	33	30	143	Control	Control	no	n/a	no	n/a	n/a	n/a
3083_2010	yes	yes	yes	yes	69	F	33	27	138	Control	Control	no	n/a	no	n/a	n/a	n/a
3085_2010	yes	yes	no	n/a	77	F	33	29	141	Control	Control	no	n/a	no	n/a	n/a	n/a
3145_2009	yes	yes	no	n/a	69	M	33	28	140	MCI	DLB	yes	11	no	n/a	n/a	n/a	Exclude; DLB clinical DX
3159_2010	yes	yes	yes	yes	79	M	33	28	142	Control	Control	no	n/a	no	n/a	n/a	n/a
3186_2010	yes	yes	yes	no	59	M	33	26	127	MCI	MCI	no	n/a	no	n/a	n/a	n/a
3189_2011	yes	yes	yes	yes	62	M	33	30	142	Control	Control	no	n/a	no	n/a	n/a	n/a	Exclude; PART-associated according to model (figure 2)
3216_2009	yes	yes	yes	no	63	M	44	6	119	AD	AD	no	n/a	no	n/a	n/a	n/a
3251_2010	yes	yes	yes	yes	79	F	33	30	138	MCI	AD	yes	2	no	n/a	n/a	n/a
40_2003	yes	yes	yes	yes	78	M	33	30	142	Control	Control	no	n/a	no	n/a	n/a	n/a
617_2001	yes	yes	no	n/a	82	M	23	26	135	MCI	MCI	no	n/a	no	n/a	n/a	n/a
618_2001	yes	yes	no	n/a	79	F	33	30	143	Control	Control	no	n/a	no	n/a	n/a	n/a	Exclude; PART-associated according to model (figure 2)
70_2002	yes	yes	yes	no	70	F	33	27	137	MCI	MCI	no	n/a	no	n/a	n/a	n/a
89_2007	yes	yes	yes	no	87	M	33	26	139	Control	Control	no	n/a	no	n/a	n/a	n/a
2447_2008	yes	no	yes	yes	86	F	33	29	132	MCI	AD	yes	n/a	sample did not pass transcriptome mapping criteria	n/a	n/a	n/a	Exclude; did not pass filtering criteria
2449_2001	yes	no	yes	no	77	F	23	29	139	Control	Control	no	n/a	sample did not pass transcriptome mapping criteria	n/a	n/a	n/a	Exclude; did not pass filtering criteria
2456_2002	yes	no	no	n/a	86	F	33	30	131	MCI	AD	yes	n/a	sample did not pass transcriptome mapping criteria	n/a	n/a	n/a	Exclude; did not pass filtering criteria
2461_2001	yes	no	no	n/a	85	M	23	30	139	MCI	DLB	yes	5	sample did not pass transcriptome mapping criteria	n/a	n/a	n/a	Exclude; did not pass filtering criteria
2570_2003	yes	no	yes	no	60	M	34	29	140	Control	Control	no	n/a	sample did not pass transcriptome mapping criteria	n/a	n/a	n/a	Exclude; did not pass filtering criteria
2575_2001	yes	no	no	n/a	74	M	34	30	143	Control	Control	no	n/a	sample did not pass transcriptome mapping criteria	n/a	n/a	n/a	Exclude; did not pass filtering criteria
2579_2003	yes	no	yes	no	68	M	33	29	141	Control	Control	no	n/a	sample did not pass transcriptome mapping criteria	n/a	n/a	n/a	Exclude; did not pass filtering criteria
2608_2004	yes	no	yes	yes	63	F	44	30	140	Control	Control	no	n/a	sample did not pass transcriptome mapping criteria	n/a	n/a	n/a	Exclude; did not pass filtering criteria
2650_2001	yes	no	yes	no	81	F	34	30	143	Control	Control	no	n/a	sample did not pass transcriptome mapping criteria	n/a	n/a	n/a	Exclude; did not pass filtering criteria
2776_2004	yes	no	yes	yes	78	F	33	30	139	Control	MCI	yes	8	sample did not pass transcriptome mapping criteria	n/a	n/a	n/a	Exclude; did not pass filtering criteria
2785_2001	yes	no	yes	no	70	F	34	30	144	Control	Control	no	n/a	sample did not pass transcriptome mapping criteria	n/a	n/a	n/a	Exclude; did not pass filtering criteria
2801_2000	yes	no	no	n/a	82	M	33	16	109	AD	AD	no	n/a	sample did not pass transcriptome mapping criteria	n/a	n/a	n/a	Exclude; did not pass filtering criteria
2865_2001	yes	no	no	n/a	70	M	44	28	126	MCI	MCI	no	n/a	sample did not pass transcriptome mapping criteria	n/a	n/a	n/a	Exclude; did not pass filtering criteria
3168_2010	yes	no	yes	yes	75	F	44	28	136	Control	Control	no	n/a	sample did not pass transcriptome mapping criteria	n/a	n/a	n/a	Exclude; did not pass filtering criteria
654_2001	yes	no	no	n/a	83	F	23	30	137	Control	AD	yes	6	sample did not pass transcriptome mapping criteria	n/a	n/a	n/a	Exclude; did not pass filtering criteria
2015_2001	yes	yes	no	n/a	87	F	34	29	138	Control	MCI	yes	7	yes	10.8247	4	AD
2294_2002	yes	yes	yes	no	96	F	24	30	142	Control	MCI	yes	5	yes	6.10959	3	AD
2481_2003	yes	yes	no	n/a	80	F	33	30	144	Control	AD	yes	4	yes	10.1836	6	AD
2656_2001	yes	yes	yes	no	74	F	34	29	140	Control	MCI	yes	12	yes	16.5973	5	AD
2821_2005	yes	yes	yes	yes	77	F	34	30	142	Control	AD	yes	4	yes	8.09589	6	AD
3126_2010	yes	yes	no	n/a	83	M	33	30	141	Control	MCI	yes	2	yes	3.18904	5	AD
96_2006	yes	yes	yes	yes	91	F	33	27	142	Control	AD	yes	2	yes	5.85753	6	AD
2011_2001	yes	yes	yes	no	85	F	33	26	132	MCI	AD	yes	2	yes	6.82466	6	AD
2529_2001	yes	yes	yes	yes	79	F	33	26	122	AD	AD	no	n/a	yes	5.53425	6	AD
2591_2001	yes	yes	yes	no	85	M	34	17	108	AD	AD	no	n/a	yes	6.53973	5	AD
2634_2002	yes	yes	no	n/a	70	F	34	30	137	Control	Control	no	n/a	yes	18.3836	n/a	AD	Exclude, AD
2678_2000	yes	yes	yes	no	56	F	33	6	50	AD	AD	no	n/a	yes	18.2411	6	AD
2722_2001	yes	yes	yes	no	91	M	34	22	115	AD	AD	no	n/a	yes	4.5726	3	AD
2724_2004	yes	yes	no	n/a	40	F	33	15	81	AD	AD	no	n/a	yes	n/a	6	AD
2748_2001	yes	yes	yes	yes	68	F	34	14	98	AD	AD	no	n/a	yes	5.34521	n/a	AD
2749_2003	yes	yes	yes	yes	70	M	44	22	122	AD	AD	no	n/a	yes	6.10137	6	AD
2758_2001	yes	yes	yes	no	61	M	34	13	94	AD	AD	no	n/a	yes	10.6219	6	AD
2777_2001	yes	yes	yes	no	68	F	34	14	94	AD	AD	no	n/a	yes	14.874	6	AD
2788_2001	yes	yes	no	n/a	72	M	23	30	141	Control	Control	no	n/a	yes	21.0301	n/a	AD	Exclude, AD
2792_2001	yes	yes	no	n/a	72	M	23	29	129	AD	AD	no	n/a	yes	20.8603	n/a	AD
2794_2003	yes	yes	yes	no	81	M	34	19	117	AD	AD	no	n/a	yes	7.8411	6	AD
2798_2001	yes	yes	yes	no	82	M	33	2	5	AD	AD	no	n/a	yes	3.0274	6	AD
2800_2003	yes	yes	yes	yes	74	M	34	22	111	AD	AD	no	n/a	yes	9.93973	6	AD
2809_2003	yes	yes	yes	yes	74	F	33	30	142	Control	Control	no	n/a	yes	13.5479	n/a	AD	Exclude, AD
2813_2001	yes	yes	yes	no	77	M	34	25	132	AD	AD	no	n/a	yes	9.66575	6	AD
2833_2001	yes	yes	no	n/a	72	M	34	21	90	AD	AD	no	n/a	yes	7.98082	6	AD
2839_2003	yes	yes	yes	yes	84	F	34	13	74	AD	AD	no	n/a	yes	3.6	6	AD
2856_2001	yes	yes	yes	yes	69	F	44	15	105	AD	AD	no	n/a	yes	13.7836	6	AD
2867_2001	yes	yes	no	n/a	81	M	34	26	121	AD	AD	no	n/a	yes	2.80822	6	AD
2876_2002	yes	yes	yes	yes	76	F	33	30	133	MCI	MCI	no	n/a	yes	13.1397	5	AD
2886_2001	yes	yes	yes	no	78	F	34	22	118	AD	AD	no	n/a	yes	7.95068	6	AD
3072_2008	yes	yes	yes	no	87	F	33	30	142	Control	Control	no	n/a	yes	4.43014	3	AD	Exclude, AD
3091_2008	yes	yes	yes	yes	80	M	34	29	125	MCI	AD	yes	2	yes	8.32603	6	AD
3239_2010	yes	yes	yes	no	83	M	33	28	135	MCI	MCI	no	n/a	yes	7.41096	4	AD
49_2007	yes	yes	yes	no	82	F	33	29	143	Control	Control	no	n/a	yes	12.6219	n/a	AD	Exclude, AD
69_2000	yes	yes	no	n/a	88	M	34	22	107	AD	AD	no	n/a	yes	4.93151	6	AD
3003_2004	yes	yes	yes	yes	78	M	34	29	125	MCI	DLB	yes	2	yes	5.23288	1	AD changes	Exclude; DLB clinical DX
3032_2009	yes	yes	yes	yes	60	M	34	30	142	MCI	DLB	yes	4	yes	6.15342	1	AD changes	Exclude; DLB clinical DX
3046_2008	yes	yes	yes	yes	81	M	34	28	138	MCI	MCI	no	n/a	yes	7.86027	2	AD changes
2750_2001	yes	yes	yes	yes	80	M	34	21	108	AD	AD	no	n/a	yes	1.11507	1	DLB	Exclude, DLB
2951_2005	yes	yes	yes	yes	84	M	33	28	132	MCI	AD	yes	3	yes	10.4	1	DLB-limbic	Exclude, DLB
2854_2002	yes	yes	no	n/a	75	M	23	26	118	AD	AD	no	n/a	yes	5.07671	0	FTD-TDP	Exclude, FTD-TDP
2573_2001	yes	yes	yes	no	63	F	33	30	143	Control	Control	no	n/a	yes	9.46575	1	Normal
2824_2001	yes	yes	no	n/a	68	F	33	29	134	Control	Control	no	n/a	yes	8.15616	2	Normal
2670_2002	yes	yes	yes	no	73	F	33	30	144	Control	Control	no	n/a	yes	19.7863	n/a	Normal
647_2001	yes	yes	yes	no	83	F	23	30	142	Control	Control	no	n/a	yes	11.2164	2	Normal
86_2001	yes	yes	yes	no	86	M	34	30	135	Control	Control	no	n/a	yes	3.98082	1	Normal
93_2008	yes	yes	yes	yes	88	F	33	28	137	Control	Control	no	n/a	yes	3.35342	1	Normal
27_2003	yes	yes	no	n/a	81	M	23	30	144	Control	Control	no	n/a	yes	14.0575	n/a	Normal
2583_2001	yes	yes	yes	yes	80	M	33	30	138	Control	Control	no	n/a	yes	8.49863	3	PART	Exclude, PART
2754_2008	yes	yes	yes	no	82	M	33	30	138	Control	Control	no	n/a	yes	9.60822	4	PART	Exclude, PART
2853_2002	yes	yes	yes	yes	79	M	34	24	132	MCI	AD	yes	3	yes	7.39452	3	PART	Exclude; PART
3041_2011	yes	yes	yes	yes	87	M	23	29	141	Control	Control	no	n/a	yes	9.71233	1	PART	Exclude, PART
3082_2010	yes	yes	no	n/a	91	M	33	29	135	Control	Control	no	n/a	yes	6.42466	3	PART	Exclude, PART
64_2004	yes	yes	yes	yes	84	F	33	30	138	Control	Control	no	n/a	yes	12.0329	4	PART	Exclude, PART
2757_2001	yes	yes	no	n/a	81	M	34	24	119	AD	AD	no	n/a	yes	8.23288	1	Vascular Dementia	Exclude, Vascular
