# Supplementary material for: Small RNA Changes in Plasma Have Potential for Early Diagnosis of Alzheimer’s Disease before Symptom Onset
Source: Cells. 2024 Jan 23;13(3):207. doi: 10.3390/cells13030207 (PMC10854972; doi:10.3390/cells13030207)
Supplement: Supplementary file 1 [file cells-13-00207-s001.zip › Supplemental table S2 Gene ID look-up table.csv]

	paste.allseq.gene..allseq.number..sep...._..	paste.allseq.biotype..allseq.gene..sep...._..	rownames.allseq.
1	RP11-159D12.1-005_1	protein_coding_RP11-159D12.1-005	TCACATTTCCTGGCATGCAGACC
2	ENST00000387405.1_2	other_TMapped_ENST00000387405.1	AGCTCCGAGGTGATTTTCATATTGAATTGCAA
3	hsa_piR_020009|gb|DQ597484|Homo_sapiens_3	piRNA_hsa_piR_020009|gb|DQ597484|Homo_sapiens	GCTAAACCTAGCCCCAAGCCCACTA
4	ENST00000389680.2_4	other_TMapped_ENST00000389680.2	CGATCAACCTCACCACCTCTTGCTCAGCCT
5	hsa-mir-10399_5	miRNA_hsa-mir-10399	TCTCGGACAAGCTGTAGGTTTAT
6	tRNA-Asp-GTC-2-9_6	tRNA_tRNA-Asp-GTC-2-9	TCCTCGTTAGTATAGTGGTGAGTATCCCCGCTTGT
7	RP11-207C16.6-004_7	protein_coding_RP11-207C16.6-004	GTTTTTCCTGATCAGAAA
8	hsa-mir-92a-1_8	miRNA_hsa-mir-92a-1	TATTGCACTTGTCCCGGCCTGTAAGG
9	ENST00000387347.2_9	other_TMapped_ENST00000387347.2	CAGATTAAAACACTGAACTGACA
10	tRNA-Gly-TCC-1-1_10	tRNA_tRNA-Gly-TCC-1-1	GCGTTGGCGGTATAGTGGTTAGCATAGC
11	MT-CO3-201_11	protein_coding_MT-CO3-201	GGAGGTCATTAGGAGGGCTGAGAGGGCCCCTG
12	hsa-mir-6824_12	miRNA_hsa-mir-6824	CTCTCTGGTCTTGCCACCCCAGATA
13	hsa-mir-331_13	miRNA_hsa-mir-331	TTCTAGGTATGGTCCCAGGGATG
14	ENST00000387347.2_14	other_TMapped_ENST00000387347.2	GCATAGGCCTGCGTCAGATTAAAACACTG
15	RP11-148K1.14-001_15	protein_coding_RP11-148K1.14-001	CGACGGCGGGGGCCCGGGCA
16	ENST00000387449.1_16	other_TMapped_ENST00000387449.1	ACAAGCACTGCTAACTCATGCCCCCATGTCTA
17	tRNA-Leu-TAG-1-1_17	tRNA_tRNA-Leu-TAG-1-1	GGTAGCGTGGCCGAGCGGCCTAAG
18	tRNA-Leu-CAG-1-1_18	tRNA_tRNA-Leu-CAG-1-1	GTTAGGATGGCCGAGCGGTCTA
19	ENST00000426654.6_19	other_TMapped_ENST00000426654.6	GCCCGGGCTGCTGCTGTTCCTGA
20	RNY4P20-201_20	YRNA_RNY4P20-201	GGCTGGTCCGATGGTAGTGGGTTATCAGAACGG
21	hsa-mir-320a_21	miRNA_hsa-mir-320a	AAAAGCTGGGTTGAGAGAGCGAG
22	ENST00000615012.1_22	other_TMapped_ENST00000615012.1	AGCAGAGACGTTGGAACTGGGC
23	AC004258.6-032_23	protein_coding_AC004258.6-032	TTGTGGGAGCTTCGCTGAACGTTAATGTGTAGT
24	hsa-mir-191_24	miRNA_hsa-mir-191	AACGGAATCCCAAAAGCAACTG
25	RP4-533D7.1-001_25	protein_coding_RP4-533D7.1-001	GGCTGCGGCTGGTGTGGAG
26	hsa-mir-370_26	miRNA_hsa-mir-370	GCGTGCTGGGGTGGAACCTGGT
27	hsa-mir-3187_27	miRNA_hsa-mir-3187	CTGGGCAGCGTGTGGCTGAAGG
28	hsa-mir-374a_28	miRNA_hsa-mir-374a	TTATAATACAACCTGATGAGTG
29	tRNA-Asp-GTC-3-1_29	tRNA_tRNA-Asp-GTC-3-1	CGCGGGAGACCGGGATTCGATTCCCCGACGGGGA
30	AC002081.3-005_30	protein_coding_AC002081.3-005	TCGGTCTTCATTGATTGGCA
31	hsa-mir-3184_31	miRNA_hsa-mir-3184	AAGCTCGGTCTGAGGCCCCTATTT
32	hsa-mir-183_32	miRNA_hsa-mir-183	TATGGCACTGGTAGAATTCACTGT
33	ENST00000387441.1_33	other_TMapped_ENST00000387441.1	GTTTAACCAAAACATCAGATTGTGAATCTGACCCA
34	RP11-413G22.1-001_34	protein_coding_RP11-413G22.1-001	CGAGCCCCGTCCGCTCCGCC
35	ENST00000364409.1_35	other_TMapped_ENST00000364409.1	TCCCCCCACTGCTAAATTTGACTGGCTC
36	ENST00000634478.1_36	other_TMapped_ENST00000634478.1	AGGAAAAGAAACCCACAGGG
37	RP11-35J10.3-010_37	protein_coding_RP11-35J10.3-010	TCCAGTGATGATGACAAAGAG
38	ENST00000387377.1_38	other_TMapped_ENST00000387377.1	AGTAAGGTCAGCTAAATAAGCTATCCGGCCACCA
39	tRNA-Asn-GTT-26-1_39	tRNA_tRNA-Asn-GTT-26-1	GCTGTTAACCGGAAGGCTGGTGGTTCG
40	ENST00000554988.1_40	other_TMapped_ENST00000554988.1	CCCACTTCAGACTACTCTCCTCCGCCCATT
41	hsa-let-7i_41	miRNA_hsa-let-7i	GGAGGGAGTAGTTTGTGCTGTT
42	hsa-mir-433_42	miRNA_hsa-mir-433	ATCATGATGGGCTCCTCGGTTT
43	Z84721.5-006_43	protein_coding_Z84721.5-006	CGCTGTCCGCCCTGAGCGACCTG
44	RP11-359H18.4-007_44	protein_coding_RP11-359H18.4-007	AAGGAAGAGACTCTGGGAC
45	RP11-846F4.3-001_45	protein_coding_RP11-846F4.3-001	GACCCCCGAAACCAGACGAGCTACC
46	RNY4P20-201_46	YRNA_RNY4P20-201	TGGTAGTGGGTTATCAGAAAC
47	hsa-mir-3184_47	miRNA_hsa-mir-3184	TGAGGGGCAGAGAGCGAGAATGA
48	hsa-mir-92a-2_48	miRNA_hsa-mir-92a-2	TCTTGAACTTGTCCCGGCCTG
49	hsa-mir-6749_49	miRNA_hsa-mir-6749	TCCTCCCCTGCCTGGCCCCGT
50	hsa-mir-324_50	miRNA_hsa-mir-324	CCACTGCCCCAGGTGCTGCTGAGT
51	AC013403.10-003_51	protein_coding_AC013403.10-003	CAATATAAAAATATAGACTTTT
52	ENST00000365274.1_52	other_TMapped_ENST00000365274.1	CCACTCCCACTGCTTCACTTGACTAGTT
53	hsa-mir-877_53	miRNA_hsa-mir-877	AGAGGAGATGGCGCAGGGGAA
54	hsa-mir-98_54	miRNA_hsa-mir-98	TGAGGTAGTAAGTTGTATTGTTTG
55	RNY4P10-201_55	YRNA_RNY4P10-201	TGGTCCGATGGTAGTGGGTTATCAGAGCTT
56	hsa-mir-425_56	miRNA_hsa-mir-425	AATGACACGATCACTCCCGTTGTG
57	ENST00000387409.1_57	other_TMapped_ENST00000387409.1	TCTAAAGACAGGGGTTAGGCCTCTCCA
58	hsa-mir-29b-1_58	miRNA_hsa-mir-29b-1	GCTGGTTTCATATGGTGGTTTAG
59	hsa-mir-342_59	miRNA_hsa-mir-342	AGGGGTGCTATCTGTGATTGAGGGAN
60	hsa-mir-4446_60	miRNA_hsa-mir-4446	ATTTCCCTGCCATTCCCTTGGAT
61	MT-CO2-201_61	protein_coding_MT-CO2-201	TACATCACAAGACGTCTTGCACTCATGAGC
62	ENST00000523053.1_62	other_TMapped_ENST00000523053.1	AACCTGACTGGTGGGACGCCTC
63	ENST00000362512.1_63	other_TMapped_ENST00000362512.1	TGACCCGCCTACTTTGCGGGATGCCTGGGAG
64	ENST00000496116.1_64	other_TMapped_ENST00000496116.1	AATTGAAGAATTCCGTGAATC
65	hsa-mir-376a-1_65	miRNA_hsa-mir-376a-1	GTAGATTCTCCTTCTATGAGTACT
66	RP5-1007M22.1-005_66	protein_coding_RP5-1007M22.1-005	CAGTGATGGAAAGATGAAAAGAA
67	ENST00000387377.1_67	other_TMapped_ENST00000387377.1	AGTAAGGTCAGCTAAATAAGCAATCGGGCCACCA
68	ENST00000387347.2_68	other_TMapped_ENST00000387347.2	CGTGATCTGAGTTCAGACCGGAGTAATCCAGGTCG
69	tRNA-Glu-CTC-1-1_69	tRNA_tRNA-Glu-CTC-1-1	CCCCTGGTGGTCTAGTGGTTAGGATTCGGCGCTCT
70	hsa-mir-1273c_70	miRNA_hsa-mir-1273c	AGAGTCTCGTTCTGTTGCCCAAA
71	RNY4-201_71	YRNA_RNY4-201	CCCCCCACTGCTAAATTTGACTGGCTTCAAAT
72	AC017100.1-013_72	protein_coding_AC017100.1-013	TCCATGCCTGCCCTGATCATCAT
73	ENST00000630242.2_73	other_TMapped_ENST00000630242.2	GCGGGCATGTGGGCGATGC
74	tRNA-Gly-TCC-1-1_74	tRNA_tRNA-Gly-TCC-1-1	GCGTTGGTGGTATAGTGGTTAACATAGCTGCCTT
75	ORAI2-210_75	protein_coding_ORAI2-210	TGGCCTCAAGTGATCCGCTCAT
76	ENST00000364409.1_76	other_TMapped_ENST00000364409.1	CCCCCCACTGCTAAATTTAACTGGCTTAAA
77	hsa-let-7d_77	miRNA_hsa-let-7d	CAGAGGTAGTAGGTTGCATAGTTTT
78	ENST00000387421.1_78	other_TMapped_ENST00000387421.1	AAGAGAACCAACACCTCTTTACAGTGACCAC
79	RNY4P28-201_79	YRNA_RNY4P28-201	CCCCTCACTGCTAAATTTGACTGGCTTAA
80	WDR47-201_80	protein_coding_WDR47-201	AATCACCAAGCTTTTGAATG
81	tRNA-Arg-TCG-3-1_81	tRNA_tRNA-Arg-TCG-3-1	AAGATTGAGGGTTCGTGTCCCTTCGTGGTCGCCA
82	RNY4-201_82	YRNA_RNY4-201	CCTCCCCACTGCTAAATTTGACTGGCTT
83	NOL12-207_83	protein_coding_NOL12-207	ACACGCGGAAGGTCGAGCG
84	hsa-mir-146b_84	miRNA_hsa-mir-146b	TGAGAACTGAATTCCATAGGCTGTTTTT
85	RP11-68C8.3-001_85	protein_coding_RP11-68C8.3-001	TTGATCCAATAACTTGACC
86	RNY4P27-201_86	YRNA_RNY4P27-201	GGTTGGACCGATGGTAGTGGGTTATCAGAACTT
87	hsa-mir-26a-1_87	miRNA_hsa-mir-26a-1	GTTCAAGTAATCCAGGATGGGC
88	RNY4-201_88	YRNA_RNY4-201	CGCATCCCCCCACTGCTAAATTTGACTGGCT
89	hsa-mir-4685_89	miRNA_hsa-mir-4685	TCTCCCTTCCTGCCCTGGCTAAT
90	tRNA-Ser-GCT-1-1_90	tRNA_tRNA-Ser-GCT-1-1	GTTCGAATCCCACCCTCTTCGCC
91	RNY4-201_91	YRNA_RNY4-201	CCCCACTGCTAAATTTGACTGGCG
92	ENST00000602865.1_92	other_TMapped_ENST00000602865.1	GGGACAAAGCCTGGCCAC
93	hsa-mir-181a-2_93	miRNA_hsa-mir-181a-2	AACANTCAACGCTGTCGGTGAGT
94	hsa-mir-148b_94	miRNA_hsa-mir-148b	TCAGTGCATCACAGAACTTTGCCT
95	hsa-mir-3184_95	miRNA_hsa-mir-3184	AAGCTCGGTNTGAGGCCCCTCAGT
96	tRNA-Glu-TTC-4-2_96	tRNA_tRNA-Glu-TTC-4-2	TCACCGCCGCGGCCCGGGTTAT
97	AC006946.13-002_97	protein_coding_AC006946.13-002	TCAATCCTCTCTCACAGCCCCA
98	RP11-173A6.1-002_98	protein_coding_RP11-173A6.1-002	TTCCGCCCCGGCTGCCGCGA
99	ENST00000384095.1_99	other_TMapped_ENST00000384095.1	CTTCTCACTACTGCACTTGACTAGTCTTCTTT
100	RNY4P10-201_100	YRNA_RNY4P10-201	AGGCTGGTCCGATGTTAGTGGGTTATCAGAACTT
101	hsa-mir-27a_101	miRNA_hsa-mir-27a	CACAGTGGCTAAGTTCCGT
102	RNY1P5-201_102	YRNA_RNY1P5-201	TCCTCACTACTGCACTTGACTAGTCTA
103	RP11-354M20.2-001_103	protein_coding_RP11-354M20.2-001	AAGCGAGAGAAAGAAAGAAGGAAGGAAGGA
104	RNY4P18-201_104	YRNA_RNY4P18-201	CCCCCACTGCTAAATTTGAGTGGCTTAA
105	ENST00000438755.1_105	other_TMapped_ENST00000438755.1	GGGGCTCCGGGGCTCCGG
106	hsa-mir-152_106	miRNA_hsa-mir-152	TCAGTGCATGACAGAACTCGGGT
107	hsa-mir-1224_107	miRNA_hsa-mir-1224	AGCGCCCGGCCCCGGCGGC
108	RP11-321A17.2-008_108	protein_coding_RP11-321A17.2-008	TCTGATGCTGCTCTGGCTCCGT
109	hsa_piR_019951|gb|DQ597403|Homo_sapiens_109	piRNA_hsa_piR_019951|gb|DQ597403|Homo_sapiens	GGTAGCTCAGTCGGTAGAG
110	hsa-mir-93_110	miRNA_hsa-mir-93	ACTGCTGAGCTAGCACTGCCCGA
111	ENST00000387347.2_111	other_TMapped_ENST00000387347.2	AACTGAACTCCTCACACCCCATTGGACCAATCTAT
112	SDC1-202_112	protein_coding_SDC1-202	TTGAAGGACGAAGGCACAGAGA
113	hsa-mir-598_113	miRNA_hsa-mir-598	TACGCCATCGTTGTCATCGTCA
114	hsa-mir-451b_114	miRNA_hsa-mir-451b	AAACCGTTACCATTACTGGT
115	RP5-1167H4.3-001_115	protein_coding_RP5-1167H4.3-001	TTATGCGCAGATGAGGAGTTGG
116	RNY1P13-201_116	YRNA_RNY1P13-201	TCCTCACTACTGCACTTGACTAA
117	hsa-mir-28_117	miRNA_hsa-mir-28	AAGGAGCTCACAGTCTATTGAAAGA
118	hsa-mir-150_118	miRNA_hsa-mir-150	CTGGTACAGGCCTGGGGGACTT
119	hsa-mir-1301_119	miRNA_hsa-mir-1301	TTGCAGCTGCCTGGGAGTGATTTCA
120	RNY4-201_120	YRNA_RNY4-201	TACAACACCCCACTGCTAAATTTGACTGGCTTTT
121	hsa-mir-885_121	miRNA_hsa-mir-885	TCCATTACACTACCCTGCATCT
122	RNY4P24-201_122	YRNA_RNY4P24-201	GGCTGGTCCGATGGTAGCCGGTTATCAGAACTT
123	hsa-mir-625_123	miRNA_hsa-mir-625	GACTATCGAACTTTCCCCCTCAT
124	AC007883.1-002_124	protein_coding_AC007883.1-002	AGGTTGTGGCGGTGGCTGGAG
125	RNY3-201_125	YRNA_RNY3-201	CACCGCTTCACTTGACTAGCCTT
126	AF121781.16-009_126	protein_coding_AF121781.16-009	GCCGGCCGGGGGACGGCCTGGG
127	ENST00000516950.1_127	other_TMapped_ENST00000516950.1	AGTGGGTTATCAGAACTTAAAA
128	ENST00000452879.1_128	other_TMapped_ENST00000452879.1	AAGGTTAGCTCAGCCAACT
129	RP5-943F2.2-001_129	protein_coding_RP5-943F2.2-001	CGTCACGTGTCTCTTCCCGGA
130	ENST00000387449.1_130	other_TMapped_ENST00000387449.1	TAACTCATGCCCCCATGTCCA
131	hsa-mir-6729_131	miRNA_hsa-mir-6729	CCTGCTCATCCCCCTCGCCCTC
132	ENST00000387347.2_132	other_TMapped_ENST00000387347.2	CCCAATTGGACCAATCTATCACCCCA
133	U91328.12-002_133	protein_coding_U91328.12-002	CCCAAAGGCTCTTTTAAGAGCCACG
134	RNY4P10-201_134	YRNA_RNY4P10-201	CGGCTNGTCCGATGGTAGTGGGTTATCAGAACT
135	RNY4P10-201_135	YRNA_RNY4P10-201	GCTGGTCCGATGGTAGTGGGTTATCAGNAC
136	hsa-let-7a-1_136	miRNA_hsa-let-7a-1	TGGGGCAGTAGGTTGTATAGTTT
137	tRNA-Glu-CTC-1-7_137	tRNA_tRNA-Glu-CTC-1-7	GTGGTCTAGTGGTTAGGATTCGGCGCTC
138	tRNA-Gln-TTG-3-3_138	tRNA_tRNA-Gln-TTG-3-3	TTGAATCCAGCGATCCGAGTTTT
139	RP11-77K12.6-011_139	protein_coding_RP11-77K12.6-011	GGATGTGGGGCGAGCGGC
140	RP1-45P21.5-001_140	protein_coding_RP1-45P21.5-001	AACATCCAGGGCATCACT
141	ENST00000362698.1_141	other_TMapped_ENST00000362698.1	TTTTTTGAGGCCTTGCTTTGGCGAGGCTA
142	hsa-mir-28_142	miRNA_hsa-mir-28	AAGGAGCTCACAGTCTATTGCGA
143	ENST00000387441.1_143	other_TMapped_ENST00000387441.1	TGAATCTGACACCAGAGGCTTACGACCC
144	ENST00000387342.1_144	other_TMapped_ENST00000387342.1	NACTTAACTTGACCGCTCTGACCA
145	hsa-mir-10399_145	miRNA_hsa-mir-10399	AATTACAGATTGTCTCAGAGAT
146	RP11-25J3.1-018_146	protein_coding_RP11-25J3.1-018	ACCTACGGAAGAAGAATG
147	RNY4P20-201_147	YRNA_RNY4P20-201	GGCTGGTCCGCTGGTAGTGGGTTATCAGAAATTA
148	hsa-mir-181a-2_148	miRNA_hsa-mir-181a-2	GAACATTCAACGCTGTTGGTGAG
149	ENST00000455074.1_149	other_TMapped_ENST00000455074.1	GGTACCCTGGTGGAAACGTAGGC
150	hsa-mir-4787_150	miRNA_hsa-mir-4787	GATGCGCCGCCCACTGCCCCGCGTTT
151	hsa-mir-889_151	miRNA_hsa-mir-889	TTAATATCGGACAACCATTGTAT
152	ENST00000445125.2_152	other_TMapped_ENST00000445125.2	TTGGTGGAGTGATTTGCCTGCT
153	AC013437.1-001_153	protein_coding_AC013437.1-001	TTGGAAGTGGGGTTGTGGG
154	hsa-let-7d_154	miRNA_hsa-let-7d	NGAGGTAGTAGGTTGCATCGT
155	AC006953.1-001_155	protein_coding_AC006953.1-001	CTGGCCCAGAGAGGTCGGCA
156	RP11-26L20.2-001_156	protein_coding_RP11-26L20.2-001	CAGGGGAGGAGGTGAGTGCAGT
157	ENST00000585788.1_157	other_TMapped_ENST00000585788.1	TGTCAGTTTGTAAAATACACC
158	ENST00000387347.2_158	other_TMapped_ENST00000387347.2	CGATGGTGCAGCCGCTATT
159	tRNA-Val-CAC-6-1_159	tRNA_tRNA-Val-CAC-6-1	TTATCACGTTCGCCTCACACGCGAAAG
160	tRNA-Lys-CTT-2-5_160	tRNA_tRNA-Lys-CTT-2-5	CAGTCGGTAGAGCATGAGACTCTTAATC
161	ENST00000469014.1_161	other_TMapped_ENST00000469014.1	ATTCTCCTTTTGGGCTCT
162	RNY4P27-201_162	YRNA_RNY4P27-201	GCCGGTCCGATGGTAGTGGGCTATCAGAACT
163	XXbac-BPG249D20.2-001_163	protein_coding_XXbac-BPG249D20.2-001	AAAGGCATTGACGGAAAGGCA
164	hsa-mir-12136_164	miRNA_hsa-mir-12136	AGGAAGGAATCGAACCCCCCAAAGTTGG
165	ENST00000537762.2_165	other_TMapped_ENST00000537762.2	CTTCCCCGGGGGCGGGCCAG
166	hsa_piR_001101|gb|DQ571419|Homo_sapiens_166	piRNA_hsa_piR_001101|gb|DQ571419|Homo_sapiens	GATAAAGTGTGTCTGAGG
167	RP1-34B20.6-001_167	protein_coding_RP1-34B20.6-001	AAGGGACTGGGTAAAGGAGGCG
168	RP11-108L7.2-002_168	protein_coding_RP11-108L7.2-002	ACGTAGAGGGGCTGAAGAGGAG
169	hsa-mir-584_169	miRNA_hsa-mir-584	TATGGTTTGCCTGGGACTGAGGA
170	hsa-mir-548aw_170	miRNA_hsa-mir-548aw	GTGCAAAAGTCATCACGGTT
171	AC099778.6-001_171	protein_coding_AC099778.6-001	GCGGCGGTGGTGGTGGCGGTGGC
172	hsa-mir-103b-1_172	miRNA_hsa-mir-103b-1	ACCAGCATTGTACAGGGCTATGA
173	RNY4P10-201_173	YRNA_RNY4P10-201	GGTCCGATGGTAGTGGGTTATCAGCACA
174	hsa-mir-150_174	miRNA_hsa-mir-150	ACTCCCAACCCTTGTACCAGTGC
175	RP11-286N22.13-012_175	protein_coding_RP11-286N22.13-012	TGACCTCATGTGATCCCCCCGG
176	RNY4-201_176	YRNA_RNY4-201	ACAACCCCCCACTGCTAAATTTGACTAGCTTT
177	hsa-mir-223_177	miRNA_hsa-mir-223	GTGTGAGTTTGTCAAATACCCC
178	hsa_piR_001170|gb|DQ571526|Homo_sapiens_178	piRNA_hsa_piR_001170|gb|DQ571526|Homo_sapiens	ATAGGTTTGGTCCTAGCCTTTCTATTAGCTCTT
179	RP11-68C8.3-001_179	protein_coding_RP11-68C8.3-001	ATTGATCCAATAACTTGAA
180	RP11-418C1.5-001_180	protein_coding_RP11-418C1.5-001	AAGGTCGCGGGTTTTTTTTTTTT
181	hsa-mir-26a-2_181	miRNA_hsa-mir-26a-2	TTCAAGTAATCCAGGATAGGCGAG
182	hsa-mir-16-2_182	miRNA_hsa-mir-16-2	TTGGCAGCACGTAAATATTGG
183	hsa-mir-671_183	miRNA_hsa-mir-671	TCCGGTTCTCAGGGCTCCACTA
184	ENST00000528804.1_184	other_TMapped_ENST00000528804.1	CGAATCTCGCCGGGGCCTCCA
185	AC009690.2-001_185	protein_coding_AC009690.2-001	TTCGCCGGGGCGGGGCGGGCCC
186	ENST00000387372.1_186	other_TMapped_ENST00000387372.1	GGACTATGAGAATCGACCCCATCCCN
187	hsa-mir-224_187	miRNA_hsa-mir-224	CAAGTCACTAGTGGTTCAGTTTAGT
188	hsa-mir-134_188	miRNA_hsa-mir-134	TGTGACTGGTTGACCAGAGGGCA
189	RP5-956O18.1-001_189	protein_coding_RP5-956O18.1-001	TGAGGGGCAGAGAGAGGGACT
190	ENST00000445125.2_190	other_TMapped_ENST00000445125.2	TTCATGGGTGGTGGTGCATGG
191	MT-ND4-201_191	protein_coding_MT-ND4-201	AGGAAGGGGTAGGCTATGTGT
192	ENST00000387347.2_192	other_TMapped_ENST00000387347.2	AAAAAATCCCAAACATATAACTGAACTCCT
193	RNY4P10-201_193	YRNA_RNY4P10-201	GGCTGGTCCGATGGTAGTGGGTTAACAGAACAA
194	RNY4P37-201_194	YRNA_RNY4P37-201	ATGGTAGTGGATTATCAGAACT
195	RP11-68C8.3-001_195	protein_coding_RP11-68C8.3-001	AAGGAACTCGGCAAATCTA
196	ENST00000624853.1_196	other_TMapped_ENST00000624853.1	AGGAACAGTTCATTCGGAT
197	ENST00000387347.2_197	other_TMapped_ENST00000387347.2	TATACCCACACCCACCCAAG
198	ENST00000445125.2_198	other_TMapped_ENST00000445125.2	TTCGTAGTTGGTGGAGTGATTTG
199	ENST00000550305.1_199	other_TMapped_ENST00000550305.1	TTTTGTGGTGTCTGGTGCG
200	ENST00000410482.1_200	other_TMapped_ENST00000410482.1	CAAAGTGTAGTATCTGTTCTCA
201	RP11-119B16.1-001_201	protein_coding_RP11-119B16.1-001	TCAAGCAGGGTGTGAATTGG
202	ENST00000389680.2_202	other_TMapped_ENST00000389680.2	ACGAAAGTGGCTTTAACATATCTGAACACACA
203	MT-ND2-201_203	protein_coding_MT-ND2-201	AAAAGCCGGTTAGCGGGGGCAGG
204	ENST00000387421.1_204	other_TMapped_ENST00000387421.1	CACTGTAAAGCTAACTTAGCATTAAACTTTTA
205	hsa-mir-4433a_205	miRNA_hsa-mir-4433a	ATGTCCCACCCCCACTGCTGTT
206	ENST00000387377.1_206	other_TMapped_ENST00000387377.1	AAGGTCAGCTAAATAAGCTATCGGGACCACCA
207	hsa-mir-425_207	miRNA_hsa-mir-425	GAATGCCACGATCACTCCCGTTGAG
208	ENST00000426910.1_208	other_TMapped_ENST00000426910.1	CGGCCCCGCTCTCTGCCCGCA
209	ENST00000387459.1_209	other_TMapped_ENST00000387459.1	GTGGTNGTAGTCCGTGCGAGAATACCA
210	RNY4P10-201_210	YRNA_RNY4P10-201	GGCTGGTCCGATAGTAGTGGGTTATCAGAACTA
211	hsa-mir-155_211	miRNA_hsa-mir-155	TTAATGCTAATCGTGATAGCGGT
212	hsa-mir-425_212	miRNA_hsa-mir-425	ATTGGGAATGTCGTGTCCGCC
213	hsa-mir-223_213	miRNA_hsa-mir-223	TGTCAGTTTGTCAAATACCCCAAAA
214	hsa_piR_020009|gb|DQ597484|Homo_sapiens_214	piRNA_hsa_piR_020009|gb|DQ597484|Homo_sapiens	GCTAAACCTAGCCCCAAACACACTA
215	ENST00000515983.1_215	other_TMapped_ENST00000515983.1	CTCTACTCCCACTGCTTCACTTGACTAGCCTA
216	RP11-846F4.3-001_216	protein_coding_RP11-846F4.3-001	TATACCCACACCCACCCAAGAACAGGGTTTGTT
217	XXbac-BPG1H2.4-001_217	protein_coding_XXbac-BPG1H2.4-001	CTAAGATTTGCTGAAGACGAAC
218	hsa_piR_020326|gb|DQ597916|Homo_sapiens_218	piRNA_hsa_piR_020326|gb|DQ597916|Homo_sapiens	GCATTGGTGGTTTAGTGGTAGAATTCTCGCT
219	hsa-let-7g_219	miRNA_hsa-let-7g	TGAGGTAGTAGTTTGTACAAT
220	ENST00000387449.1_220	other_TMapped_ENST00000387449.1	GAGAAAGCTCACAAGAACCA
221	hsa-mir-339_221	miRNA_hsa-mir-339	GGGCGCCTCGACGACAGAGCCG
222	ENST00000364551.1_222	other_TMapped_ENST00000364551.1	TCTCCACTCCCACTGCTTCACTTT
223	AC002094.5-001_223	protein_coding_AC002094.5-001	CAGGCAAGAGCCTCCACGT
224	ENST00000387342.1_224	other_TMapped_ENST00000387342.1	CTTAGGAGATTTCACCTTAACTTGACCGC
225	RP4-733D15.4-002_225	protein_coding_RP4-733D15.4-002	GAACCACTCCGACCCCATCCCG
226	tRNA-Arg-CCG-2-1_226	tRNA_tRNA-Arg-CCG-2-1	TTGTGGGTTCGAGTCCCATCTCGGTCGCCA
227	tRNA-Gln-CTG-4-2_227	tRNA_tRNA-Gln-CTG-4-2	AATCCAGCGATCCGAGTTTAT
228	hsa-let-7f-2_228	miRNA_hsa-let-7f-2	GAGGTAGTAGATTGTATAGA
229	RP11-383C12.1-002_229	protein_coding_RP11-383C12.1-002	GTGTCCGAATGAGGCACCTCT
230	hsa-mir-518e_230	miRNA_hsa-mir-518e	AAAGCGCTTCCCTTCAGAGTGA
231	hsa-mir-12136_231	miRNA_hsa-mir-12136	GAAAAAGTCATGGAGGCCATGGGGC
232	tRNA-Gln-CTG-5-1_232	tRNA_tRNA-Gln-CTG-5-1	GCACTCTGGACTCTGAATTT
233	hsa-mir-431_233	miRNA_hsa-mir-431	TGTCTTACAGGCCGTCATGCAGG
234	ENST00000363301.1_234	other_TMapped_ENST00000363301.1	CCCCCCACTGCGAAATTTGACTGGCTTATT
235	hsa-mir-29a_235	miRNA_hsa-mir-29a	TAGCACCATCTGAAACCGGTT
236	ENST00000387382.1_236	other_TMapped_ENST00000387382.1	ACAGACCAAGAGCCTTCA
237	hsa-mir-191_237	miRNA_hsa-mir-191	CAACGGAATCCCCAAAGCAGCTT
238	ENST00000457435.1_238	other_TMapped_ENST00000457435.1	ACAGCAGTTGGACATGGGGGAG
239	ENST00000387347.2_239	other_TMapped_ENST00000387347.2	CACTGAACTGACAATTAACA
240	hsa_piR_016659|gb|DQ592932|Homo_sapiens_240	piRNA_hsa_piR_016659|gb|DQ592932|Homo_sapiens	CCCCCACTGCTAAATTTGACTGGTTG
241	tRNA-Gly-CCC-1-2_241	tRNA_tRNA-Gly-CCC-1-2	CACGCGGGAGACCCGGGTTCA
242	hsa-let-7g_242	miRNA_hsa-let-7g	TNAGGTAGTAGTTTGTACAGTT
243	ENST00000387460.2_243	other_TMapped_ENST00000387460.2	CGGAGATGAAAACCTTTTTCCAAGG
244	RP5-1103G7.7-004_244	protein_coding_RP5-1103G7.7-004	CACCCCAGAACAGGGTTTTAAA
245	RNY3-201_245	YRNA_RNY3-201	CTTCTACACTCCCACTGCTTCACTTGACTAGCCT
246	AC093620.6-001_246	protein_coding_AC093620.6-001	GGTGGGAGCTGGGGGTGGTCGC
247	AC016776.3-023_247	protein_coding_AC016776.3-023	ACTCGGAGGGTTTCTGTGAGAGA
248	hsa-mir-25_248	miRNA_hsa-mir-25	CATTGCACTTGTCTCAGTCTGG
249	hsa-mir-146a_249	miRNA_hsa-mir-146a	TTGAGAACTGAATTCCATGGG
250	AC073058.1-001_250	protein_coding_AC073058.1-001	GCGACGGTGGCGGCATTGGAC
251	ENST00000587640.1_251	other_TMapped_ENST00000587640.1	TACCGCCCCCCTCCCTTCCAGA
252	AC073842.13-001_252	protein_coding_AC073842.13-001	AATCTCCGGGCGGGGTTGTAGG
253	RNY4-201_253	YRNA_RNY4-201	AACCCCCCACTGCTAAATTTGACTGTT
254	tRNA-Gly-GCC-1-1_254	tRNA_tRNA-Gly-GCC-1-1	CTAGACTTCTCGCCTGCCACG
255	ENST00000387347.2_255	other_TMapped_ENST00000387347.2	TCACCTTTAAATTTGCCCACAGAACCCT
256	tRNA-Glu-CTC-1-7_256	tRNA_tRNA-Glu-CTC-1-7	GCTCTCACCGCCGCGGCCCGGGG
257	RNY4P16-201_257	YRNA_RNY4P16-201	ATGGTAGTGGGTTATCAGAACAA
258	hsa-mir-222_258	miRNA_hsa-mir-222	ACATCTGGCTACTGGGTCTTTT
259	hsa-mir-1273h_259	miRNA_hsa-mir-1273h	TCTGCAGACTCGACCTCCCAGGC
260	ENST00000384090.1_260	other_TMapped_ENST00000384090.1	CCCCACTGCTTCACTTGACTA
261	hsa-mir-4738_261	miRNA_hsa-mir-4738	GAAACTGGAGCGCCTGGAGGAA
262	hsa-mir-5193_262	miRNA_hsa-mir-5193	TCCTCTACCTCATCCCAGTTCCTT
263	ENST00000364813.1_263	other_TMapped_ENST00000364813.1	CTCCCACTGGTTCACTTGACTAGCCTTA
264	hsa-mir-320a_264	miRNA_hsa-mir-320a	AAAAGCTGGGTTGAGAGNGCGAT
265	ENST00000387347.2_265	other_TMapped_ENST00000387347.2	AACATATAACTGAACTCCTCACAA
266	ENST00000387342.1_266	other_TMapped_ENST00000387342.1	TCAACTTAACTTGACCGCTATGACCA
267	tRNA-Asp-GTC-3-1_267	tRNA_tRNA-Asp-GTC-3-1	CGCGGGAGACCGGGGTTCGGTTCCCCGA
268	RP11-215L17.2-001_268	protein_coding_RP11-215L17.2-001	TAACAGCCCAATATCTACAATCAACCAA
269	RP11-38P22.1-001_269	protein_coding_RP11-38P22.1-001	ACGCCCCTCGCCTCCCCGCGGA
270	hsa-mir-150_270	miRNA_hsa-mir-150	ATCTCCTAACCCTTGTACCAGTG
271	tRNA-Gly-GCC-1-5_271	tRNA_tRNA-Gly-GCC-1-5	GCATGGGTGGTTCAGTGGT
272	AC013437.1-001_272	protein_coding_AC013437.1-001	TTTTGGAAGTGGGGTTGTGG
273	AC104389.17-004_273	protein_coding_AC104389.17-004	TCTTTGAGTCCTTTGGGGATCTGTCCACTCCTG
274	hsa-mir-1249_274	miRNA_hsa-mir-1249	ACGCCCGTCCCCCCCTTCTTCA
275	tRNA-Arg-CCG-2-1_275	tRNA_tRNA-Arg-CCG-2-1	AATGGATAAGGCATCAGCCT
276	ENST00000389680.2_276	other_TMapped_ENST00000389680.2	GCTAAGACCCAAACTGGGACCA
277	RNY4P10-201_277	YRNA_RNY4P10-201	GGTCCGGTGGTAGTGGGTTATCAGAACT
278	RP11-80I15.5-004_278	protein_coding_RP11-80I15.5-004	TCTGTGTCCATCCTCGAGGA
279	ENST00000436501.1_279	other_TMapped_ENST00000436501.1	CGATCAGGTAGGAAACTAGAGC
280	RNY4P19-201_280	YRNA_RNY4P19-201	GGCTGGTCCGNTGGTAGTGGATTATCANAACT
281	ENST00000387342.1_281	other_TMapped_ENST00000387342.1	CTTAGGAGATTTCAACTTAACTTGACCGCTGACCA
282	SKOR2-203_282	protein_coding_SKOR2-203	ATCCTGCTGGCGTCGCCG
283	hsa-mir-625_283	miRNA_hsa-mir-625	AGGGGGAAAGTTCTATCGTC
284	RNY3P1-201_284	YRNA_RNY3P1-201	TTCTCCACTCCCACTGCTTCACTTGACTAACC
285	AC007365.2-001_285	protein_coding_AC007365.2-001	TGAAGATGGGCTGGAAGGCA
286	ENST00000387347.2_286	other_TMapped_ENST00000387347.2	ATGATATCATCTCAACTTAGC
287	RP11-90L1.2-001_287	protein_coding_RP11-90L1.2-001	TGTGCGGGGGAACCAGGAAT
288	tRNA-Lys-TTT-3-1_288	tRNA_tRNA-Lys-TTT-3-1	TGCCCGGATAGCTCAGTCGGTAGAGCATCAGAC
289	hsa-let-7c_289	miRNA_hsa-let-7c	TGAGGTAGTAGGTTGTATCGTTGT
290	hsa-mir-382_290	miRNA_hsa-mir-382	AATCATTCACGGACAACAATTT
291	RP11-20B24.1-012_291	protein_coding_RP11-20B24.1-012	TGGCTGGAAGAGCCCATCACC
292	ENST00000389680.2_292	other_TMapped_ENST00000389680.2	GTATACTTCAAAGGACATTTAACTAAAACCC
293	hsa-mir-4485_293	miRNA_hsa-mir-4485	GTTTAACGGCCGCGGTACCC
294	hsa-mir-29a_294	miRNA_hsa-mir-29a	TAGCACCATCTGAAATCGGAAG
295	hsa-mir-6877_295	miRNA_hsa-mir-6877	CAGGGCCGAAGGGTGGAAGCTGA
296	hsa-mir-92a-1_296	miRNA_hsa-mir-92a-1	GGAGTATTGCACTTGTCCCGGCCTGT
297	AC001226.6-016_297	protein_coding_AC001226.6-016	GAAGTGCTGATTGGTCAGGTTG
298	ENST00000387347.2_298	other_TMapped_ENST00000387347.2	GATAAAGTATAGGCGATAGAAATTGAAACCT
299	ENST00000549097.5_299	other_TMapped_ENST00000549097.5	TAAGAAGGAAATAGGGGGAGAGG
300	ENST00000387441.1_300	other_TMapped_ENST00000387441.1	TTAACCAAAACATCAGATTGTGAATCTGACACC
301	ENST00000387347.2_301	other_TMapped_ENST00000387347.2	AATTGGACCAATCTATCACCCTATAGAAGAACTA
302	ENST00000387372.1_302	other_TMapped_ENST00000387372.1	AATTCTCCGTGCCACCTATCACACCCA
303	ENST00000389680.2_303	other_TMapped_ENST00000389680.2	ATATCTGAACACACAATAGCT
304	SETD1B-204_304	protein_coding_SETD1B-204	GAAGGAGGAAGAGGAGGCGG
305	hsa-mir-581_305	miRNA_hsa-mir-581	CTTGTGTTCTCTAGATCAGTGC
306	RP11-43N16.1-011_306	protein_coding_RP11-43N16.1-011	ATCCTGGGGCTGGAGAAGGTCC
307	RNY4-201_307	YRNA_RNY4-201	ACCCCCCACTGCTAAATTTGACTGTTA
308	ENST00000532231.1_308	other_TMapped_ENST00000532231.1	TGTGTTTGTGTCTGTGTCAGGG
309	hsa_piR_014620|gb|DQ590013|Homo_sapiens_309	piRNA_hsa_piR_014620|gb|DQ590013|Homo_sapiens	GTGGTTGTAGTCCGTGCGAGAATTCCA
310	hsa-mir-151a_310	miRNA_hsa-mir-151a	CTCGAGGAGCTCACAGTCTAGC
311	hsa-mir-130b_311	miRNA_hsa-mir-130b	ACTATTTCCCTGTTGCACTACT
312	hsa-mir-574_312	miRNA_hsa-mir-574	CACGCTCATGCACACGCCCA
313	ENST00000445125.2_313	other_TMapped_ENST00000445125.2	CTTTCTTGATTCCATGGGTGGTG
314	tRNA-Gly-GCC-1-1_314	tRNA_tRNA-Gly-GCC-1-1	TAGGATTCTCGCCTGCCACGC
315	hsa-mir-451b_315	miRNA_hsa-mir-451b	AAACCGTTACCATTATTGAGTTT
316	RNY4P10-201_316	YRNA_RNY4P10-201	GGTCCGATGGTAGTGGGATATCAGAACTT
317	hsa-mir-4433a_317	miRNA_hsa-mir-4433a	TGTCCCACCCCCACTCCT
318	ENST00000387347.2_318	other_TMapped_ENST00000387347.2	TTAACCAGTGAAATTGACCT
319	ENST00000387347.2_319	other_TMapped_ENST00000387347.2	ATAAGGAAAGGTTAAAAAAAGTAAAAGG
320	RNY4P17-201_320	YRNA_RNY4P17-201	GGCTGGTCAGATGGTAGCGGGTTATCAGAACA
321	ENST00000631292.1_321	other_TMapped_ENST00000631292.1	GAGAGGGAGAGAACGCGGTCTGAGNGGT
322	tRNA-Ser-GCT-1-1_322	tRNA_tRNA-Ser-GCT-1-1	GACGGGGTGGCCGAGTGGTTA
323	ENST00000387377.1_323	other_TMapped_ENST00000387377.1	AAGCTATCGGGCCCATACCCCGAC
324	hsa-mir-3184_324	miRNA_hsa-mir-3184	AGCTCGGTCTGAGGCCCCTCAGTAGC
325	hsa-mir-151a_325	miRNA_hsa-mir-151a	CTAGANTGAAGCTCCTTGAGGA
326	ENST00000514642.1_326	other_TMapped_ENST00000514642.1	AAGAGGGGCTAAAGGTTGAGT
327	hsa-mir-4659b_327	miRNA_hsa-mir-4659b	TTCTTCTTAGACATGGCAACGT
328	hsa-mir-652_328	miRNA_hsa-mir-652	AATGGCGTCACTAGGGTTGT
329	hsa_piR_018569|gb|DQ595533|Homo_sapiens_329	piRNA_hsa_piR_018569|gb|DQ595533|Homo_sapiens	GAATTGGTGGTTCAGTGGTAGAATTCT
330	ENST00000364409.1_330	other_TMapped_ENST00000364409.1	TACTCCCCCCACTGCTAAATT
331	RNY4P7-201_331	YRNA_RNY4P7-201	GGCTCGTCCGATGGTAGTGGG
332	AC091984.2-002_332	protein_coding_AC091984.2-002	CTATTAGATGCAGGAAGATA
333	hsa-mir-3184_333	miRNA_hsa-mir-3184	AGCTCGGTCTGAGGCCCCTCGAA
334	RNY4P10-201_334	YRNA_RNY4P10-201	GGCTGGTCCGATGGTAGTGGGTTATCAGACCTC
335	hsa-mir-4433a_335	miRNA_hsa-mir-4433a	AGGAGAGGGGGGTGGGACGT
336	hsa-mir-487b_336	miRNA_hsa-mir-487b	TAGTACAGGGTCATCCACTTT
337	ENST00000384563.1_337	other_TMapped_ENST00000384563.1	TCTCCACTCCCACTGCTTCACTTGACCAGTA
338	hsa-mir-12136_338	miRNA_hsa-mir-12136	GAAAAAGTCATGGAGGCCCAA
339	AC113208.1-008_339	protein_coding_AC113208.1-008	AGCAGCATTTTACAGGGCTA
340	hsa-mir-548ag-2_340	miRNA_hsa-mir-548ag-2	AAGAACCTCAATTACCTTTGCA
341	hsa-mir-485_341	miRNA_hsa-mir-485	GTCATACACGGCTCTCCTCCCA
342	ENST00000365241.1_342	other_TMapped_ENST00000365241.1	TTCGAGACCCGCGGGTGCTTTCCAGCTCTATT
343	hsa-mir-627_343	miRNA_hsa-mir-627	CTCTTTTCTTTGAGACTCACTAT
344	hsa-mir-483_344	miRNA_hsa-mir-483	AAGACGGGAGGAAAGAAGGGATAA
345	CTB-54O9.4-003_345	protein_coding_CTB-54O9.4-003	CGGCGAGTGAAGCGGGCAG
346	ENST00000460761.1_346	other_TMapped_ENST00000460761.1	GAAGTGGAATTTCTGGGCCTT
347	MT-CO1-201_347	protein_coding_MT-CO1-201	AAGTGTTGTGGGCAGAAAGTTAGATTTACGCC
348	tRNA-Glu-CTC-1-7_348	tRNA_tRNA-Glu-CTC-1-7	TGGTTAGGATTCGGCGCTCTCACCGTCGCGGCCCG
349	hsa-mir-320a_349	miRNA_hsa-mir-320a	AAAAGCTGGGTTGAGAGGGCGAGGT
350	ENST00000491504.5_350	other_TMapped_ENST00000491504.5	GAAATGGGAAGAGCCTGT
351	CTD-2371O3.1-001_351	protein_coding_CTD-2371O3.1-001	ACTCCTTTTTGAATTCATA
352	ENST00000637046.1_352	other_TMapped_ENST00000637046.1	TTTGAAATCTCCAAGGCATGATG
353	RNY4-201_353	YRNA_RNY4-201	CAACCCCCCACTGCTTAATTTGACTGGCTT
354	ENST00000363120.1_354	other_TMapped_ENST00000363120.1	GGCCCGCGGGCGCTCTCCAGTCCTTT
355	tRNA-Glu-TTC-2-2_355	tRNA_tRNA-Glu-TTC-2-2	ACATGGTCTAGCGGTTAGGACTCCT
356	hsa-let-7e_356	miRNA_hsa-let-7e	TGAGGTAGGAGGTTTTATAG
357	RP1-122O8.6-004_357	protein_coding_RP1-122O8.6-004	GTTCAAATCCTACCTGGGGAGC
358	hsa-mir-22_358	miRNA_hsa-mir-22	AAGCTGCCAGTTGAAGAACTGTTA
359	hsa-mir-92b_359	miRNA_hsa-mir-92b	TATTGCACTCGTCCCGGCCCGTA
360	ENST00000387347.2_360	other_TMapped_ENST00000387347.2	TGCTCATAAGGAAAGGTTAAAAAAG
361	RNY4-201_361	YRNA_RNY4-201	CCCCCACTGCTAAATTTGACTGGCTTTTTTCTT
362	hsa-mir-93_362	miRNA_hsa-mir-93	GAAGTGCTGTTCGTGCAGGT
363	ENST00000387372.1_363	other_TMapped_ENST00000387372.1	TAGGATGGGGTGTGATAGGTGGCACGGCGAATTTC
364	RP11-864G5.4-002_364	protein_coding_RP11-864G5.4-002	CATTTAGAGGAAGTAAAAA
365	MT-ND6-201_365	protein_coding_MT-ND6-201	GGTTGAGGTCTTGGTGAG
366	RP11-181L23.6-011_366	protein_coding_RP11-181L23.6-011	GGGGAACTAGGAAGGAACTTGG
367	hsa-mir-1273h_367	miRNA_hsa-mir-1273h	CTGCAGACTCGACCTCCCAGGCT
368	ENST00000517487.5_368	other_TMapped_ENST00000517487.5	TTCGCCTCCACAACCCCCTCT
369	ENST00000389680.2_369	other_TMapped_ENST00000389680.2	TAAATCAACAAAACTGCTCGC
370	ENST00000511840.1_370	other_TMapped_ENST00000511840.1	ATGGACAAAATGAGATCATGT
371	ENST00000467626.6_PAR_Y_371	other_TMapped_ENST00000467626.6_PAR_Y	TAATCCTGAGGTCGCAAGTTCG
372	hsa-let-7i_372	miRNA_hsa-let-7i	TGAGGTAGTAGTTTGTGATG
373	hsa-mir-196a-2_373	miRNA_hsa-mir-196a-2	TAGGTAGTTTCATGTTGTTGGGAT
374	ENST00000641867.1_374	other_TMapped_ENST00000641867.1	CCTTGGATGTCTGATGGCCTA
375	RP11-846F4.3-001_375	protein_coding_RP11-846F4.3-001	CCACCCAAGATCAGGGTTTGTTA
376	hsa-mir-625_376	miRNA_hsa-mir-625	GGACTATAGAACTTTCCCCCTTT
377	RP11-81A22.7-001_377	protein_coding_RP11-81A22.7-001	AAATAATTTTAGGGTTGGGAAA
378	tRNA-Ala-AGC-4-1_378	tRNA_tRNA-Ala-AGC-4-1	TTCGATCCCCAGCATCTCCACC
379	ENST00000448892.1_379	other_TMapped_ENST00000448892.1	AGCTGGATGTGGTCGCTCG
380	hsa-mir-1273h_380	miRNA_hsa-mir-1273h	TGCAGACTCGACCTCCCAGA
381	ENST00000617465.1_381	other_TMapped_ENST00000617465.1	ATCAGATACCGTCTTAGTC
382	RNY4P7-201_382	YRNA_RNY4P7-201	CGGCTGCTCCGATGGTAGTGGGTTATCAGAAC
383	hsa-mir-16-2_383	miRNA_hsa-mir-16-2	CTAGCAGCACGTAAATATTGGCC
384	hsa-mir-378a_384	miRNA_hsa-mir-378a	ACTGGACTTGGAGTCAGAA
385	hsa-mir-92a-2_385	miRNA_hsa-mir-92a-2	TATTGCACTTGTCCCGGCCTGTTTTTC
386	tRNA-Glu-CTC-1-7_386	tRNA_tRNA-Glu-CTC-1-7	GTGGTTAGGATTCGGCGCTCCCACCGC
387	hsa-mir-191_387	miRNA_hsa-mir-191	CAACGGAATCCCAAAGGCAGCTGTA
388	AC016643.1-010_388	protein_coding_AC016643.1-010	TGACCTCAGGTGATCCTCCTTT
389	hsa-mir-1972-1_389	miRNA_hsa-mir-1972-1	TAAGCCAGGTGTGGTGGCACT
390	AC105391.3-001_390	protein_coding_AC105391.3-001	TTGATAGGCTGGATGTGGA
391	RP1-228H13.3-001_391	protein_coding_RP1-228H13.3-001	AAGTCCTCTCCTGGCACCA
392	ENST00000491724.1_392	other_TMapped_ENST00000491724.1	GAAGAGGTAAAGGGTTGGATTGT
393	hsa-mir-101-2_393	miRNA_hsa-mir-101-2	TCAGTACTGTGATAACTGAAG
394	ENST00000435306.1_394	other_TMapped_ENST00000435306.1	GACAAAGACAAGTCATCATGG
395	RP11-539L10.1-001_395	protein_coding_RP11-539L10.1-001	CCTCTCATGGACTCTGACGGCTGC
396	tRNA-Gly-GCC-1-1_396	tRNA_tRNA-Gly-GCC-1-1	GTAGAATGCTCGCCTGCCACGCGG
397	hsa-mir-181b-2_397	miRNA_hsa-mir-181b-2	AACATTCATTGCTGTCGGTGGGAA
398	ENST00000646849.1_398	other_TMapped_ENST00000646849.1	TTTCTGAAGGCAGGAATGTGCA
399	AC026461.4-001_399	protein_coding_AC026461.4-001	AGCGCCCGGCCGGGGCGGA
400	ENST00000387400.1_400	other_TMapped_ENST00000387400.1	TTAACTAAGTGTTTGTGGGAAA
401	RNY4P23-201_401	YRNA_RNY4P23-201	GAAGTGGGTTATCAGAACT
402	ENST00000387347.2_402	other_TMapped_ENST00000387347.2	AATATAGCAAGGACTAACCC
403	AC011944.1-009_403	protein_coding_AC011944.1-009	AGTTGTGGCAGGGATAAAAGAAT
404	tRNA-Phe-GAA-1-6_404	tRNA_tRNA-Phe-GAA-1-6	ATCTAAAGGTCCCTGGTTCGATCT
405	hsa-mir-16-2_405	miRNA_hsa-mir-16-2	TAACAGCCCGTAAATATTGGCG
406	RP3-337O18.8-001_406	protein_coding_RP3-337O18.8-001	CTCTCTCAGTGACTGCGTCTCCG
407	ENST00000387347.2_407	other_TMapped_ENST00000387347.2	ATAGACGATAGAAATTGAAACCT
408	ENST00000620864.1_408	other_TMapped_ENST00000620864.1	TTCGATGTTTGGGTGTTGG
409	hsa_piR_016677|gb|DQ592953|Homo_sapiens_409	piRNA_hsa_piR_016677|gb|DQ592953|Homo_sapiens	TTTGGTCTAGTGGTTAGGATTCG
410	RP11-34D15.3-001_410	protein_coding_RP11-34D15.3-001	GCCCAGATGGCGGCCTTGG
411	tRNA-Gly-GCC-1-5_411	tRNA_tRNA-Gly-GCC-1-5	GCATGGGTGGTTCAGTGGTAGATTTCTCGCCT
412	AF233439.8-001_412	protein_coding_AF233439.8-001	AATCCCACTTCTGACACCATTT
413	AC007608.3-001_413	protein_coding_AC007608.3-001	AGGCCCATGGCTTAGGGACG
414	RNY4P18-201_414	YRNA_RNY4P18-201	CCCCCCCACTGCTAAATTTGACTGGC
415	RP11-627K11.2-004_415	protein_coding_RP11-627K11.2-004	GGAGGGGGAACAAAAAAAAAA
416	RNY4P6-201_416	YRNA_RNY4P6-201	GGCTGGTCCTATGGTTGTGGGTTATCAGAACT
417	ENST00000384502.1_417	other_TMapped_ENST00000384502.1	CTTTCACTACTGCACTTGGCTAGTCTT
418	ENST00000364469.1_418	other_TMapped_ENST00000364469.1	GGCTGGTCCGNTAGTAGTGGGTTATCANAACT
419	RP11-373C9.2-001_419	protein_coding_RP11-373C9.2-001	TGCTGTCAACGGCGAGGCT
420	MT-ND6-201_420	protein_coding_MT-ND6-201	CCAATAGGATCCTCCCGAATCAACCCTGACCC
421	RP11-752G15.5-002_421	protein_coding_RP11-752G15.5-002	AAGGTAGATAGAACAGGTCTTTTT
422	RP3-322I12.1-003_422	protein_coding_RP3-322I12.1-003	TGAGCTCAGTGACGCCAGCGCG
423	hsa-mir-92b_423	miRNA_hsa-mir-92b	TATTGCACTCGTCCCGGCCTCTG
424	hsa-mir-425_424	miRNA_hsa-mir-425	TATGACACGATCACTCCCGTTG
425	RP11-461F16.2-005_425	protein_coding_RP11-461F16.2-005	CATCCGGTCTCCAAGGTG
426	RNY3P2-201_426	YRNA_RNY3P2-201	CCACTCCCAGTGCTTCACTTGACTAGCCTA
427	AC034193.4-002_427	protein_coding_AC034193.4-002	TTGGGGGGTGGGAGAGGGGACC
428	ENST00000387347.2_428	other_TMapped_ENST00000387347.2	TAAGCCTGCGTCAGATTAAAACA
429	hsa-mir-122b_429	miRNA_hsa-mir-122b	TGGAGTGTGACAATNGTGTTT
430	tRNA-Gly-TCC-3-1_430	tRNA_tRNA-Gly-TCC-3-1	GCGTTGGAGGTATAGTGGTAAGCATAGCTG
431	ENST00000364409.1_431	other_TMapped_ENST00000364409.1	CCCCCCACTGCTAAATTTGTCTGGCTTAA
432	ENST00000387347.2_432	other_TMapped_ENST00000387347.2	TTATACCCACACCCACCCAAGAACGGGGTTTGTTA
433	ENST00000387377.1_433	other_TMapped_ENST00000387377.1	AGGTCAGCTAAATAAGTTATC
434	AC012491.1-002_434	protein_coding_AC012491.1-002	CACCACAAAAGGTGTTAGT
435	RP11-346L11.2-001_435	protein_coding_RP11-346L11.2-001	TGAGAACATAAAGGAAGAGGCA
436	hsa-mir-5683_436	miRNA_hsa-mir-5683	TACAGATGCAGATTCTCTGACTTT
437	tRNA-Gly-GCC-3-1_437	tRNA_tRNA-Gly-GCC-3-1	GAATTCTCGCCTGCCACGC
438	RNY4-201_438	YRNA_RNY4-201	ATACAACCCCCCACTGCTAAACTTGACTGGCTT
439	hsa-mir-548ac_439	miRNA_hsa-mir-548ac	CAAAAGTTATTGTGGTTTTTG
440	ENST00000387377.1_440	other_TMapped_ENST00000387377.1	TAAGCTATCGGGCCCATACCCCGAACCC
441	hsa-mir-378a_441	miRNA_hsa-mir-378a	TTGGACTTGGAGTCAGAAGGC
442	hsa-mir-101-2_442	miRNA_hsa-mir-101-2	GCACAGTACTGTGATAACTG
443	RP11-540D14.7-001_443	protein_coding_RP11-540D14.7-001	ATCCGGGCCGCGCGGGGAAGGGGAGA
444	ENST00000387347.2_444	other_TMapped_ENST00000387347.2	AAGTATAGGCGATAGAAATTGAA
445	AC026194.1-001_445	protein_coding_AC026194.1-001	TGAGCGTGTGTGTGTGAGTGT
446	AC093402.2-001_446	protein_coding_AC093402.2-001	CCTCCAGGTCTCCGCCCCGTGT
447	hsa-mir-10b_447	miRNA_hsa-mir-10b	GACCCTGTAGAACCGAATTTGTG
448	RNY4P10-201_448	YRNA_RNY4P10-201	CTGGTCCGATGGTAGTGGGTTATCAGAACTTATA
449	RP11-677M14.1-002_449	protein_coding_RP11-677M14.1-002	GACACCAGCATGGACTGCTGCACCGAGTT
450	hsa-mir-625_450	miRNA_hsa-mir-625	GGCTCTAGAACTTTCCCCCTCA
451	RNY3-201_451	YRNA_RNY3-201	CCTCCACTCCCACTGCTTCACTTGACTAGCCT
452	tRNA-Asn-GTT-5-1_452	tRNA_tRNA-Asn-GTT-5-1	TAGCGCGTTCGGCTGTTAACC
453	ENST00000387459.1_453	other_TMapped_ENST00000387459.1	TCACTGGTCGTGGTTGTAGTCCGTG
454	RNY3P12-201_454	YRNA_RNY3P12-201	CTTCACTTGACTAGCCTC
455	hsa-mir-4524a_455	miRNA_hsa-mir-4524a	TGAGACAGGCTTATGCTGCTAT
456	hsa_piR_016970|gb|DQ593407|Homo_sapiens_456	piRNA_hsa_piR_016970|gb|DQ593407|Homo_sapiens	CCGTGGTGTAGTGGTCATCACGTTC
457	RNY3P13-201_457	YRNA_RNY3P13-201	TAATTGATCACAACCAGTTACAGATTTCTTTG
458	hsa-mir-487a_458	miRNA_hsa-mir-487a	GTGATTATCCCTGCTGTGTTCG
459	hsa-mir-92a-2_459	miRNA_hsa-mir-92a-2	TATTGCACTTGTCCCGGCCTGTGGA
460	hsa-mir-18a_460	miRNA_hsa-mir-18a	ACTGCCCTAAGTGCTCCTTCCGA
461	hsa-mir-942_461	miRNA_hsa-mir-942	CTGTTTTGGCCATGTGTGA
462	ENST00000384070.1_462	other_TMapped_ENST00000384070.1	GCCCACTGCTTCACTTGACTAGCCTT
463	RP4-773A18.1-003_463	protein_coding_RP4-773A18.1-003	TGGAGGAGGTGGAGGAGGCG
464	tRNA-Asp-GTC-3-1_464	tRNA_tRNA-Asp-GTC-3-1	GGTTCGATTCCCCGACGGGGAGCCA
465	hsa-mir-363_465	miRNA_hsa-mir-363	ATTGAACGGTATCCATCTGT
466	hsa-let-7d_466	miRNA_hsa-let-7d	AGAGGTAGTAGGTTNCATAGTN
467	GPR6-202_467	protein_coding_GPR6-202	GGGCCGGCGCCCCGCCTCGGC
468	RNY4P23-201_468	YRNA_RNY4P23-201	CTGCTAAATTTGACTGGCTTTGT
469	hsa-mir-484_469	miRNA_hsa-mir-484	TCTGGCTCAGTCCCCTCCCGA
470	AP000304.8-006_470	protein_coding_AP000304.8-006	ACTCTGCTGCTGACCGGTCTATG
471	hsa-mir-877_471	miRNA_hsa-mir-877	GTAGAGGAGATGGCGCAGGATA
472	hsa-mir-140_472	miRNA_hsa-mir-140	TACCACAGGGTAGAACCACC
473	RNY4-201_473	YRNA_RNY4-201	GCTCTCCCCCCACTGCTAAATTTGACTGGCTTTT
474	hsa-mir-545_474	miRNA_hsa-mir-545	CCTCAGTAAATGTTTATTAGATGA
475	RNY3-201_475	YRNA_RNY3-201	TCTGCACTCCCACTGCTTCACTTGACTAGCCTT
476	AC006042.4-001_476	protein_coding_AC006042.4-001	CGGCGGCGGCGGCGGCGTT
477	RP11-288H12.2-001_477	protein_coding_RP11-288H12.2-001	GAGGAGGAGGAGGAGGAAGT
478	tRNA-Asp-GTC-3-1_478	tRNA_tRNA-Asp-GTC-3-1	GAGACCGGGGTTCGATTCCCCGAGG
479	RNY4P10-201_479	YRNA_RNY4P10-201	GTCTGGTCCGATGATAGTGGGTTATCAGAACT
480	RP11-158H5.1-001_480	protein_coding_RP11-158H5.1-001	AATAATAAGATAGGACCTTGGT
481	tRNA-Arg-TCT-2-1_481	tRNA_tRNA-Arg-TCT-2-1	ATGGATAGCGCATTGGATTTCTAATT
482	RNY4P23-201_482	YRNA_RNY4P23-201	CCCCCCGCTGCTAAATTTGACTGGCNG
483	hsa-mir-140_483	miRNA_hsa-mir-140	ACCACAGGGTAGAACCACGGATT
484	hsa-mir-320a_484	miRNA_hsa-mir-320a	AAAAGCTGGGTTGAGAGGGCGATTAT
485	ENST00000387347.2_485	other_TMapped_ENST00000387347.2	CACTGAACTGACAATTAACAGC
486	hsa-mir-142_486	miRNA_hsa-mir-142	TATAAAGTAGAAAGCACTACTA
487	RP5-1076E17.1-004_487	protein_coding_RP5-1076E17.1-004	AACCCCCCCTGGATGTCATCGAGA
488	tRNA-Asp-GTC-2-1_488	tRNA_tRNA-Asp-GTC-2-1	GCTTGTCACGCGGGAGACCGGGGTTCGATTCCCC
489	hsa-mir-378a_489	miRNA_hsa-mir-378a	ACTGGACTTGGAGTCAGACGGG
490	hsa-mir-151a_490	miRNA_hsa-mir-151a	TACTAGACTGAAGCTCCTGGAG
491	hsa-let-7f-1_491	miRNA_hsa-let-7f-1	CTATACAATCTATTGCCTTCC
492	ENST00000387456.1_492	other_TMapped_ENST00000387456.1	ACTTTTAAGGGATAACAGCTATCCATTGGTC
493	hsa-mir-548au_493	miRNA_hsa-mir-548au	AAAAAGTAATTGCGGTTTTT
494	RNY4P27-201_494	YRNA_RNY4P27-201	GGCCGGTCCGATGGTAGTGGGTTATAAGAACT
495	AC008429.2-003_495	protein_coding_AC008429.2-003	GTAGGAGGGCGCGGCGGCCGC
496	hsa-mir-12136_496	miRNA_hsa-mir-12136	AGCTTTGGGGGGTTCGATT
497	RNY4-201_497	YRNA_RNY4-201	CCCCCCACTGCTAAATTTGACTGGCTTCCA
498	hsa-mir-22_498	miRNA_hsa-mir-22	AGTTCTTCAGTGGCAGGCTTTA
499	hsa-mir-760_499	miRNA_hsa-mir-760	TCGGCTCTGGGTCTGTGGGGAGTT
500	hsa-mir-4485_500	miRNA_hsa-mir-4485	CACCGCCTGCCCAGTGACAAAAA
501	ENST00000387400.1_501	other_TMapped_ENST00000387400.1	TAACTAAGTGTTTGTGGGTTTAAGTCCCATTGGAA
502	hsa-mir-1307_502	miRNA_hsa-mir-1307	TCTCGGCGTGGCGTCGGTCGTGGT
503	ENST00000480694.2_503	other_TMapped_ENST00000480694.2	GAGCCCAGCGCTGAATCCTG
504	Z84721.6-006_504	protein_coding_Z84721.6-006	CAAGTTCCTGGCTTCTGTGAGCACCG
505	MT-CO3-201_505	protein_coding_MT-CO3-201	CATTAGGAGGGCTGAGAGGGCCCCTGAAAA
506	ENST00000387400.1_506	other_TMapped_ENST00000387400.1	TAACTAAGTGTTTGTGGGTTTAAAA
507	ENST00000618872.1_507	other_TMapped_ENST00000618872.1	TTTTCCTCTGCTCTCATACCACA
508	hsa-mir-28_508	miRNA_hsa-mir-28	CACTAGATTGTGAGCTCC
509	RNY4P3-201_509	YRNA_RNY4P3-201	TGGTAGTGGGTTATCAGGACA
510	RP11-85G20.3-001_510	protein_coding_RP11-85G20.3-001	TGTCACTCCTCTCCCTTCTCC
511	ENST00000479708.1_511	other_TMapped_ENST00000479708.1	GATTCAGGTAATGCAGAAA
512	hsa_piR_000805|gb|DQ571003|Homo_sapiens_512	piRNA_hsa_piR_000805|gb|DQ571003|Homo_sapiens	CCAACATAGCGAGACCCCGTCTCTA
513	hsa-mir-125a_513	miRNA_hsa-mir-125a	TCCCTGAGACCCTTTAATCTGTGT
514	AC092436.1-003_514	protein_coding_AC092436.1-003	ACTGAACTTGGAGACGACGGC
515	NSD1-202_515	protein_coding_NSD1-202	TGGAGGAAGGTGGGGATGATGT
516	hsa-mir-484_516	miRNA_hsa-mir-484	CAGGATCAGTCCCCTCCCGAT
517	RP11-141E21.1-001_517	protein_coding_RP11-141E21.1-001	CTCTTCAGCTCCGTCTCCCTTGA
518	ENST00000387347.2_518	other_TMapped_ENST00000387347.2	GGCGGGCATGACACAGCAAGACGAGAA
519	MT-CO1-201_519	protein_coding_MT-CO1-201	TCTAGATTTTATGTATACGGGTTCTTCGA
520	RNY3-201_520	YRNA_RNY3-201	CTTCTCCACTCCCACTGCTTCACTTGACTAGCCAT
521	hsa-mir-342_521	miRNA_hsa-mir-342	NCTCACACAGAAATCGCACCCGTC
522	ENST00000410569.1_522	other_TMapped_ENST00000410569.1	AGCTTTGCGCAGTGGCAGTATCGTAGCCAATGAGG
523	ENST00000560351.2_523	other_TMapped_ENST00000560351.2	GTCATCTGGAAGAGGGTTT
524	AL590763.4-002_524	protein_coding_AL590763.4-002	CCCTCCCTCTGCCGGGTCT
525	hsa-mir-21_525	miRNA_hsa-mir-21	GCTAGCTTATCAGACTGATGTTGAC
526	AC133528.4-001_526	protein_coding_AC133528.4-001	GCGCCGTACGGCAGGATGGAGTC
527	hsa-mir-363_527	miRNA_hsa-mir-363	ACTTGCACGGTATCCATCTGTAA
528	hsa-mir-28_528	miRNA_hsa-mir-28	CCACTAGATTGTGAGCTCCT
529	AC004943.2-005_529	protein_coding_AC004943.2-005	AGGAGGAGGAGGAGGCGGCGGC
530	ENST00000471644.5_530	other_TMapped_ENST00000471644.5	TCCCCCAGGGATGGAGAAAGGGCTGTGGG
531	hsa-mir-424_531	miRNA_hsa-mir-424	CAAAACGCGAGGCGCTGCTATA
532	hsa_piR_016658|gb|DQ592931|Homo_sapiens_532	piRNA_hsa_piR_016658|gb|DQ592931|Homo_sapiens	TCCACCCCCCCACTGCTAAATTTGACTGGCTA
533	AC110926.6-001_533	protein_coding_AC110926.6-001	CTCCCCCAAGAGCTCATATC
534	hsa-mir-222_534	miRNA_hsa-mir-222	AGCTACATCTGGCTACTGGGCCTCTC
535	hsa-mir-342_535	miRNA_hsa-mir-342	TCTCACACAGAAATCGCACTCGT
536	RP11-346N8.1-001_536	protein_coding_RP11-346N8.1-001	TCGATTCCCCTTCTCGGTACCA
537	AC009090.10-001_537	protein_coding_AC009090.10-001	TGGGCCGCGGGCGGGGTTGGAAA
538	RP11-83J16.2-001_538	protein_coding_RP11-83J16.2-001	CGGAGAATTTTGAAAAAAAAAAAAA
539	hsa-mir-140_539	miRNA_hsa-mir-140	TACCCCAGGGTAGAACCACGG
540	AC093142.1-004_540	protein_coding_AC093142.1-004	TGGCCTCTCTTCTCTCTCCAGT
541	hsa-mir-199a-1_541	miRNA_hsa-mir-199a-1	TAGAGTAGTCTGCACATTGGTTA
542	ENST00000386347.1_542	other_TMapped_ENST00000386347.1	ACTTAAAACTTTACAGTCAGAGGTTCAATTCCTCT
543	RP11-46H11.4-001_543	protein_coding_RP11-46H11.4-001	CCTAGCTGCTCGGGAGGCTGAGGTGNG
544	AC116914.1-001_544	protein_coding_AC116914.1-001	GTTCACAGTCCGACGATCCTGA
545	hsa-mir-484_545	miRNA_hsa-mir-484	AGGCTCAGTCCCCTCCCGATTT
546	hsa-mir-21_546	miRNA_hsa-mir-21	ATAGCTTCTCAGACTGATGTTGAC
547	ENST00000510841.1_547	other_TMapped_ENST00000510841.1	GACACAGGTGGGTAGGTAGA
548	hsa-let-7a-1_548	miRNA_hsa-let-7a-1	TGAGGTAGTAGGTTGTATAGCTAT
549	hsa-let-7b_549	miRNA_hsa-let-7b	NGAGGTAGTAGGTTGTGTGGTTC
550	RP5-1029F21.1-001_550	protein_coding_RP5-1029F21.1-001	GGAGAGGTGCCGGAGCGGCTGA
551	tRNA-Lys-CTT-1-1_551	tRNA_tRNA-Lys-CTT-1-1	TCGGTAGCGCATGGGACTCTTAATCC
552	EPPK1-201_552	protein_coding_EPPK1-201	CTGGCGCTGATCAACTCTGAG
553	hsa-mir-12136_553	miRNA_hsa-mir-12136	GAAAAAGTCATGTAGGCCATGGGGTTG
554	hsa-mir-29a_554	miRNA_hsa-mir-29a	CCTAGCACCATCTGAAATCGGT
555	ENST00000387441.1_555	other_TMapped_ENST00000387441.1	TGAATCTGACAACAGAGGCTTGCGACCCCTT
556	ENST00000386347.1_556	other_TMapped_ENST00000386347.1	CGCATAAAACTTAAAACTT
557	hsa-let-7b_557	miRNA_hsa-let-7b	CGAGGCAGTAGGTTGTGTGGTT
558	tRNA-Glu-TTC-2-1_558	tRNA_tRNA-Glu-TTC-2-1	TCCCACATGATCTAGCGGTTAGGATTCCT
559	RNY4P14-201_559	YRNA_RNY4P14-201	CCCCCCACTGNTAAATTTGACTGGCTANA
560	hsa-mir-451b_560	miRNA_hsa-mir-451b	AACCGTTACCATTACTAAG
561	hsa-mir-222_561	miRNA_hsa-mir-222	AGCTACATCTGGCTACCGGGTCTCTA
562	PTPRA-203_562	protein_coding_PTPRA-203	GAAGGTGGAGTAGGAACAG
563	ENST00000364535.1_563	other_TMapped_ENST00000364535.1	GGCTGGTCCGNTGGTAGTGGGTTACCANAACT
564	RP11-23B15.4-001_564	protein_coding_RP11-23B15.4-001	AGAAATAGGCTTTTCTTCGGA
565	hsa-mir-3138_565	miRNA_hsa-mir-3138	ACAGTGAGGTAGAGGGAGTGTT
566	ENST00000362765.1_566	other_TMapped_ENST00000362765.1	ACTACCACTGCTTCACTTGACTAGA
567	hsa-mir-326_567	miRNA_hsa-mir-326	CCTCTGGGCCCTTCCTCCCAT
568	tRNA-Glu-TTC-14-1_568	tRNA_tRNA-Glu-TTC-14-1	TCCCTGTGGTCTAGTGGCTAGGATTCGGCGCTT
569	ENST00000410794.1_569	other_TMapped_ENST00000410794.1	GATTTTTGGAGCAGGGCGAT
570	ENST00000365160.1_570	other_TMapped_ENST00000365160.1	TACCTCCTCATGCCGGACTTTCT
571	RP11-68C8.3-001_571	protein_coding_RP11-68C8.3-001	AAAGGCACTCGGCAAATCTTACCCCGCCTGTTAAA
572	hsa-mir-324_572	miRNA_hsa-mir-324	CCACTGCCCCAGGTGCTGTA
573	ENST00000506773.7_573	other_TMapped_ENST00000506773.7	TTTCTCTGACCAAAAAAAAAAA
574	hsa-mir-30a_574	miRNA_hsa-mir-30a	TGTAAACATCCTCGACTGGTA
575	RNY4P10-201_575	YRNA_RNY4P10-201	CTGGTCCGATGGGAGTGGGTTATCAGAACT
576	hsa-mir-339_576	miRNA_hsa-mir-339	TCCCTGTCCTCCAGGAGTTCAC
577	hsa-mir-181a-2_577	miRNA_hsa-mir-181a-2	AACGTTCAACGCTGTCGGTGAGTTT
578	ENST00000387342.1_578	other_TMapped_ENST00000387342.1	AGATTTCAACTTAACTTGACCGCTCTGACCAG
579	ENST00000387392.1_579	other_TMapped_ENST00000387392.1	ACTGCAAAACCCCACTCTGCATCAACTGAA
580	hsa-mir-21_580	miRNA_hsa-mir-21	TAGCTTATCAGACTGATGTTGACCT
581	ENST00000387347.2_581	other_TMapped_ENST00000387347.2	ATAAGGCCTACTTCACAAAGCGCCTTCCCCCG
582	ENST00000387347.2_582	other_TMapped_ENST00000387347.2	CGTTCAAGCTCAACACCCAC
583	RP11-846F4.3-001_583	protein_coding_RP11-846F4.3-001	CCACCCAAGAACAGGGTTTAGA
584	hsa-mir-3184_584	miRNA_hsa-mir-3184	AGGGGCAGAGAGCGAGACTA
585	tRNA-Gly-TCC-3-1_585	tRNA_tRNA-Gly-TCC-3-1	ATACCTGCCTTCCAAGCAGGTGACCCGGGTTCG
586	hsa-mir-1307_586	miRNA_hsa-mir-1307	CCGACCGGACCTCGACCGGCTC
587	ENST00000475833.1_587	other_TMapped_ENST00000475833.1	ATGAAGGCCTTCGGGTTGTAAA
588	ENST00000410647.1_588	other_TMapped_ENST00000410647.1	GGTAGTGGTTTATCAGAAC
589	RNY4P29-201_589	YRNA_RNY4P29-201	GGCTGGTCCCATGATAGTGGGTTATCAGAAC
590	RP11-752G15.5-002_590	protein_coding_RP11-752G15.5-002	AAGGTAGATAGAACAGGTCGTG
591	hsa-mir-654_591	miRNA_hsa-mir-654	TATGTCTGCTGACCATCACCATAT
592	tRNA-Lys-CTT-1-2_592	tRNA_tRNA-Lys-CTT-1-2	GTCGGTAGAGCATGGGACTCTTAATNCCAGGGT
593	RP1-179N16.4-001_593	protein_coding_RP1-179N16.4-001	ACGACGGCGGGGGCCCCGGGCT
594	ENST00000384737.1_594	other_TMapped_ENST00000384737.1	TGCTGCCAGTCTCCTTCAGAC
595	RNY4-201_595	YRNA_RNY4-201	CCCCCACTGCTAAATTTGACTGGCTTCTTTC
596	hsa-mir-486-2_596	miRNA_hsa-mir-486-2	TCCTGTACTGAGCTGCCCTGAGCT
597	ENST00000392584.2_597	other_TMapped_ENST00000392584.2	GCATAAATAACAAATTCGACT
598	hsa-mir-223_598	miRNA_hsa-mir-223	GTCAGTTTGTCAAATACCCCC
599	RP11-399J11.2-001_599	protein_coding_RP11-399J11.2-001	AGGAAGGCGGGGATGACGTCAGG
600	hsa-mir-25_600	miRNA_hsa-mir-25	TTTGCACTTGTCTCGGTCTGA
601	RNY3-201_601	YRNA_RNY3-201	TTCGCCACTCCCACTGCTTCACTTGACTAGCCT
602	hsa-mir-556_602	miRNA_hsa-mir-556	ATGAGCTCATTGTAATATGA
603	hsa-mir-181c_603	miRNA_hsa-mir-181c	ACCATCGTCCGTTGAGTGGACC
604	hsa-mir-628_604	miRNA_hsa-mir-628	ATGCTGACATATTTACTAGAGGAA
605	ENST00000626538.1_605	other_TMapped_ENST00000626538.1	ATCAGATGTGCCCAGATG
606	RNY4P10-201_606	YRNA_RNY4P10-201	GGCGGGTCCGATAGTAGTGGGTTATCAGAACT
607	RP11-68C8.3-001_607	protein_coding_RP11-68C8.3-001	GGAACCAGACGAGCTACCTAAGAACAGCTAAA
608	hsa-mir-126_608	miRNA_hsa-mir-126	CGTACCGTGGGTAATAATGCGC
609	RP11-388C12.6-007_609	protein_coding_RP11-388C12.6-007	ACCTCCTCTCCCTCCGCCT
610	tRNA-Gly-GCC-1-5_610	tRNA_tRNA-Gly-GCC-1-5	GCATGGGTGGNTCAGTGGTAGAATTCTNGCCT
611	tRNA-Leu-CAG-1-1_611	tRNA_tRNA-Leu-CAG-1-1	GGTTGGATGGCCGAGCGGTCTA
612	ENST00000387449.1_612	other_TMapped_ENST00000387449.1	AACTCATGCCCCCATGCCTAACAACATGGCTT
613	hsa-mir-127_613	miRNA_hsa-mir-127	TCGGATCCGTCTGAGCTTGGTTAA
614	RP11-355C3.1-022_614	protein_coding_RP11-355C3.1-022	CCTGGCGGCGAGCGGCGGCCG
615	RP11-307C12.1-001_615	protein_coding_RP11-307C12.1-001	TTCGAATCCTGCCTCTCCC
616	ENST00000387377.1_616	other_TMapped_ENST00000387377.1	AGCTATCGGGCCCATACCCCA
617	hsa-mir-590_617	miRNA_hsa-mir-590	TAATTTTATGTATAAGATAGT
618	AC091045.1-008_618	protein_coding_AC091045.1-008	CCTGGGAGGTTGAGGCTGCAGA
619	RP11-463O12.4-001_619	protein_coding_RP11-463O12.4-001	TGTCCGGTGCTGTGGCTGTTTTT
620	ENST00000493013.3_620	other_TMapped_ENST00000493013.3	TGAGTCCAGGAGTTCTGGGCTGTAGTGCGCT
621	tRNA-Leu-AAG-1-1_621	tRNA_tRNA-Leu-AAG-1-1	GATAGCGTGGCCGAGCGGTCTAAG
622	ENST00000364535.1_622	other_TMapped_ENST00000364535.1	GGCTGGTCGGATGGTAGTGGGTTACCAGAACT
623	AC087687.1-001_623	protein_coding_AC087687.1-001	CGATCCCGTCCGTCTCCACC
624	hsa-mir-486-2_624	miRNA_hsa-mir-486-2	CTTCTGTACTGAGCTGCCCCGA
625	tRNA-Tyr-GTA-4-1_625	tRNA_tRNA-Tyr-GTA-4-1	GGCAGATAGCTCAGCTGGTAGAG
626	RP1-34B20.6-001_626	protein_coding_RP1-34B20.6-001	TACTACCGTCGCTTGTTTTTCAGA
627	hsa-mir-6516_627	miRNA_hsa-mir-6516	AATTTGCAGTAACAGGTGTGAG
628	AC104389.17-001_628	protein_coding_AC104389.17-001	ATATTATGAAGGGCCTTGAGCATCTGGA
629	ENST00000387419.1_629	other_TMapped_ENST00000387419.1	AACTTTGTCAAAGTTAAATTATAGGCTAA
630	hsa-mir-548h-4_630	miRNA_hsa-mir-548h-4	AAAAGTAATTGCGGTTTTAG
631	hsa-mir-320a_631	miRNA_hsa-mir-320a	AAGCTGGGTTGAGAGGGCGACTTT
632	MT-ND3-201_632	protein_coding_MT-ND3-201	TAAGAAGAATTTTATGGAGAAAGGGAC
633	hsa-mir-27b_633	miRNA_hsa-mir-27b	ATTCACAGTGGCTAAGTTCTG
634	ENST00000365530.1_634	other_TMapped_ENST00000365530.1	CACAAATGATGAATAACAAAGGGACTTAATACTGA
635	hsa-mir-3615_635	miRNA_hsa-mir-3615	TCTCTCGGCTCCTCGCGGCTCGTTTC
636	RNY4-201_636	YRNA_RNY4-201	CAACCCACTGCTAAATTTGACTGGCTTTTT
637	ENST00000387347.2_637	other_TMapped_ENST00000387347.2	AGTATTAGAGGCACCGCCTGCCCAGTGACACA
638	MT-CO1-201_638	protein_coding_MT-CO1-201	TCGACCCCGCCGGAGGAGGAGACC
639	hsa-mir-26b_639	miRNA_hsa-mir-26b	TTCAAGTAATTCAGGATCGGTTTT
640	hsa-let-7a-2_640	miRNA_hsa-let-7a-2	GAGGGTGAGGTAGTAGGTTGTATAGTT
641	AC004840.5-002_641	protein_coding_AC004840.5-002	CAGCGTTGGGCCCATGCAGG
642	RP11-526A4.1-006_642	protein_coding_RP11-526A4.1-006	GCTCCCAGGATAAAAGGTAC
643	ENST00000389680.2_643	other_TMapped_ENST00000389680.2	AAGGACATTTAACTAAAACCCCA
644	hsa-mir-12136_644	miRNA_hsa-mir-12136	GAAAAAGTCATGGAGGCCATGGGGTCAAA
645	hsa-mir-30c-2_645	miRNA_hsa-mir-30c-2	TGTACACATCCTACACTCTCAGC
646	RP11-68C8.3-001_646	protein_coding_RP11-68C8.3-001	GTAAAAGGAACTCGGCAAATA
647	AC090233.1-002_647	protein_coding_AC090233.1-002	AGTTTTTGGTGACGTGGGT
648	hsa-mir-339_648	miRNA_hsa-mir-339	TGAGCGCCTCGACGACAGAGCCGA
649	ENST00000627965.1_649	other_TMapped_ENST00000627965.1	TAAAGGCAGATTGATTTTGA
650	RNY4-201_650	YRNA_RNY4-201	ACCCCCCACTGCTAAATTTGACTGACTTTAA
651	ENST00000541795.1_651	other_TMapped_ENST00000541795.1	TGTTCCTGGTTGTCTGGTACCTG
652	hsa-mir-181b-2_652	miRNA_hsa-mir-181b-2	AACATTCATTGCTGTCGGTGATAT
653	AC130324.1-001_653	protein_coding_AC130324.1-001	CCCCCACTGCTAGATTTGACTGGCTTTA
654	ENST00000642075.1_654	other_TMapped_ENST00000642075.1	TTCGAATCTGACAGATGGCTCCA
655	AC133539.2-001_655	protein_coding_AC133539.2-001	GGCGCCGTGGTTCACGCCTGTAATCNCAGCA
656	hsa_piR_019420|gb|DQ596670|Homo_sapiens_656	piRNA_hsa_piR_019420|gb|DQ596670|Homo_sapiens	GAGGACTGATGACAAGAAAAGGC
657	hsa-let-7f-1_657	miRNA_hsa-let-7f-1	TGACGTAGTAGATTGTATAGTTG
658	RP11-656E20.2-008_658	protein_coding_RP11-656E20.2-008	ACATGGGGAAAGAGGGTG
659	RP11-466C23.3-004_659	protein_coding_RP11-466C23.3-004	CGACGGCGGGGGTCCCGGGC
660	tRNA-Asp-GTC-1-1_660	tRNA_tRNA-Asp-GTC-1-1	TCCTCGTTAGTATAGTGGTAAGTATC
661	U52111.8-003_661	protein_coding_U52111.8-003	CAACCCCTGACGCTGATGG
662	tRNA-Ala-TGC-4-1_662	tRNA_tRNA-Ala-TGC-4-1	GCACGTATGAGGCCCCGGGT
663	hsa-let-7b_663	miRNA_hsa-let-7b	AAGGTAGTAGGTTGTGTGG
664	ENST00000387347.2_664	other_TMapped_ENST00000387347.2	GTACATGCTAAGACTTCACCAGTCAAAGCGCCA
665	ENST00000365160.1_665	other_TMapped_ENST00000365160.1	NGGGTCGGAGTTAGCTCAAGCGG
666	RNY4-201_666	YRNA_RNY4-201	AACCCCCCACTGCTAAATTTGACTGGCTG
667	tRNA-Leu-AAG-4-1_667	tRNA_tRNA-Leu-AAG-4-1	GGTAACGTGGCCGAGTGGT
668	RP11-114B7.2-004_668	protein_coding_RP11-114B7.2-004	ACGGGTAACGGAGTGTTAGGGCT
669	DMBX1-202_669	protein_coding_DMBX1-202	TGAGAGGCTGGGGTGCCCG
670	RNY4P6-201_670	YRNA_RNY4P6-201	CCCATTGCTAAATTTGAC
671	tRNA-Val-CAC-4-1_671	tRNA_tRNA-Val-CAC-4-1	GTTTCCGTAGTGTAGTGGTTATAACGTTCGCCT
672	ENST00000387377.1_672	other_TMapped_ENST00000387377.1	AGTAAGGTCAGCTAAATAAGCTATCGGGCCCCCCA
673	ENST00000602478.1_673	other_TMapped_ENST00000602478.1	ATCACCGTCCCCAGCTGCGC
674	MARCH2-201_674	protein_coding_MARCH2-201	CGGGCCGGGCCGGGCCGGGA
675	ENST00000410482.1_675	other_TMapped_ENST00000410482.1	GCTAAGATCAAAGTGTAGTATCTGTTCTCA
676	hsa-mir-3184_676	miRNA_hsa-mir-3184	AGCTCGGTCTGAGGCCCCTCAGATTT
677	hsa-mir-155_677	miRNA_hsa-mir-155	TTAATGCTAATCGTGATATGGGTTT
678	ENST00000479052.5_678	other_TMapped_ENST00000479052.5	AGGCTGGTCCGATGGTAGTGGTTATCAGAAC
679	RNY4-201_679	YRNA_RNY4-201	TGCCCCCACTGCTAAATTTGACTGGCTT
680	ENST00000387449.1_680	other_TMapped_ENST00000387449.1	CATGCCCCCACGTCTAACAACATGGCT
681	RP11-840I19.1-011_681	protein_coding_RP11-840I19.1-011	TTTGAATTTTCAGTATGAA
682	ENST00000595245.1_682	other_TMapped_ENST00000595245.1	TAGAAAGACAAAGGAATAGAA
683	ENST00000387347.2_683	other_TMapped_ENST00000387347.2	GCTAAACCTAGCCCCAAACCCACTCCACCTTAC
684	RP11-274J16.3-001_684	protein_coding_RP11-274J16.3-001	TGCGCTGGGCGGCCGCCACCT
685	ENST00000364409.1_685	other_TMapped_ENST00000364409.1	CCCCCCACTGCTAAATTTGACTGCCTTAATT
686	RNY4P6-201_686	YRNA_RNY4P6-201	GGCTGGTCCNATGGTAGTGGGTTATCAGAACTTA
687	ENST00000387405.1_687	other_TMapped_ENST00000387405.1	AGAAGCAGCTTCAAACCTGCCGG
688	RNY4-201_688	YRNA_RNY4-201	CCCCCCACTGCTAAATTTGACT
689	RNY4-201_689	YRNA_RNY4-201	GCCCCCACTGCTAAATTTGACTGGTTTTT
690	hsa-mir-425_690	miRNA_hsa-mir-425	AATGACGCGATCACTCCCGTTGAG
691	RNY4P27-201_691	YRNA_RNY4P27-201	ACTGCTAAATTTGACTGGCTTAAATTTT
692	RP11-41H23.1-001_692	protein_coding_RP11-41H23.1-001	AGGAGCACCGATGGCGAAGGCA
693	ENST00000530703.1_693	other_TMapped_ENST00000530703.1	GAATAGGTGGGAGACGTTGA
694	hsa-mir-24-2_694	miRNA_hsa-mir-24-2	TTGCCTACTGAGCTGAAACACA
695	tRNA-Glu-TTC-14-1_695	tRNA_tRNA-Glu-TTC-14-1	AGTGGCTAGGATTCGGCG
696	hsa-mir-30d_696	miRNA_hsa-mir-30d	TGTAAACATCCCCGACGGGAA
697	tRNA-His-GTG-1-9_697	tRNA_tRNA-His-GTG-1-9	AGTGGTTAGTACCCTGCGTT
698	hsa_piR_020388|gb|DQ598008|Homo_sapiens_698	piRNA_hsa_piR_020388|gb|DQ598008|Homo_sapiens	GGCTCGTTGGTCTAGGGGTATGACTCTCGC
699	hsa-mir-126_699	miRNA_hsa-mir-126	CATCGTACCGTGAGTAATAATGCG
700	tRNA-Thr-TGT-3-1_700	tRNA_tRNA-Thr-TGT-3-1	GGCTCCATAGCTCAGGGGA
701	hsa-let-7a-3_701	miRNA_hsa-let-7a-3	GGTGGGTGAGGTAGTAGGTTGTATAGTT
702	RP11-203J14.1-001_702	protein_coding_RP11-203J14.1-001	CGCGAGGAAGGTGGGGATGACG
703	hsa-mir-664a_703	miRNA_hsa-mir-664a	TATTCATTTATCCCCAGCCAACAA
704	MT-ND4-201_704	protein_coding_MT-ND4-201	TACTGGGAGAACTCTCTGTGCTAGTAAAACCA
705	MT-CO2-201_705	protein_coding_MT-CO2-201	AAGAGCTTATCCCCTTTCATGATCACGCCC
706	hsa-mir-146b_706	miRNA_hsa-mir-146b	TGAGAACTGAATTCCATAGGCTGCTA
707	ENST00000387347.2_707	other_TMapped_ENST00000387347.2	ACATGCTAAGACTTCACCAG
708	ENST00000571632.5_708	other_TMapped_ENST00000571632.5	GTGGGGTGGGGAATTGAGAGGATT
709	hsa-mir-15a_709	miRNA_hsa-mir-15a	CAGCCGCACATAATGGTTTGT
710	hsa-let-7d_710	miRNA_hsa-let-7d	AGAGGTAGTAGGTTGCATAGTTGGGG
711	hsa-mir-320a_711	miRNA_hsa-mir-320a	AAAAGCTGGGTTGAGAGTGCGTAT
712	RP11-443P11.3-008_712	protein_coding_RP11-443P11.3-008	CAGGCCCCGGCTCCCTCCTGAT
713	RP11-467J12.4-002_713	protein_coding_RP11-467J12.4-002	TCCTCTTCTCTCTCCTCCCAGT
714	MMRN1-201_714	protein_coding_MMRN1-201	GTTGGAGGCACTGGAGGCATTGGAGGCGTTGGAGG
715	RNY4P28-201_715	YRNA_RNY4P28-201	GGGCTGGTCCGATGGTAGTGGGTTATCAACT
716	hsa-mir-181a-2_716	miRNA_hsa-mir-181a-2	ACCACTGACCGTTGACGGTACC
717	RP11-697H9.1-001_717	protein_coding_RP11-697H9.1-001	TAGGAGGTTTAGAATAGGTGG
718	ENST00000363154.1_718	other_TMapped_ENST00000363154.1	CACTCCCACTGCTTCTCTTGACTAGCCTT
719	ENST00000557366.5_719	other_TMapped_ENST00000557366.5	GTATTCGTATTCCATTGTCAGA
720	ENST00000389680.2_720	other_TMapped_ENST00000389680.2	ACGCATTTATATAGAGGAGACAAGTCGTA
721	RNY4P14-201_721	YRNA_RNY4P14-201	GGCTGGTCTGATGGTAGTGGGTTATCAGAATTT
722	RP11-317N8.1-001_722	protein_coding_RP11-317N8.1-001	CTCTTTCTTGATTGTATGA
723	tRNA-Glu-TTC-2-1_723	tRNA_tRNA-Glu-TTC-2-1	TAGGCGGCCCGGGTTCGACTCCCGGTGTGGGAACC
724	ENST00000643426.1_724	other_TMapped_ENST00000643426.1	CTACTCTTTGCACCCCTCTG
725	ENST00000387449.1_725	other_TMapped_ENST00000387449.1	ACTGCTAACTCATGCCCCCATGTCTAGC
726	RP11-89C21.1-001_726	protein_coding_RP11-89C21.1-001	TGATGTCGGCTCATCGCAACCTGGG
727	tRNA-Glu-TTC-4-2_727	tRNA_tRNA-Glu-TTC-4-2	GCGGCCCGGGTTCGATTCCCGGTCAGG
728	hsa-mir-223_728	miRNA_hsa-mir-223	TGTCAGTTTGTCAAATACACCATTT
729	RP11-846F4.3-001_729	protein_coding_RP11-846F4.3-001	CCCACCCAGGAACAGGGTTTGTTA
730	hsa-mir-5006_730	miRNA_hsa-mir-5006	TTTCCCTTTCCATCCTGGCAGA
731	hsa-mir-92a-1_731	miRNA_hsa-mir-92a-1	TATTGCACTTGTCCCGGCATGTA
732	tRNA-Lys-TTT-5-1_732	tRNA_tRNA-Lys-TTT-5-1	CGGATAGCTCAGCCGGTAGAGCATCAGA
733	hsa-mir-641_733	miRNA_hsa-mir-641	AAGACATAGGATAGAGTCACCTCTT
734	hsa_piR_020498|gb|DQ598180|Homo_sapiens_734	piRNA_hsa_piR_020498|gb|DQ598180|Homo_sapiens	GGGGTATAGCTCAGTTGGTAGAGC
735	tRNA-Met-CAT-1-1_735	tRNA_tRNA-Met-CAT-1-1	ATCTGAAGGTCGTGAGTTCG
736	ENST00000481799.5_736	other_TMapped_ENST00000481799.5	GCCAAGCCGGTCCCCGCCCCGGA
737	hsa-let-7b_737	miRNA_hsa-let-7b	TTGAGGTCGTAGGTTGTGTGG
738	hsa-mir-320a_738	miRNA_hsa-mir-320a	AAAAGCTGGGTTGAGAGGGCGAAACA
739	ENST00000603252.1_739	other_TMapped_ENST00000603252.1	GCCTCCAAGCAGTGGGAGGA
740	hsa-mir-548at_740	miRNA_hsa-mir-548at	AAAGGTTATTGCGGTTTTGGCT
741	RNY4P10-201_741	YRNA_RNY4P10-201	GGCTGGTCCGATGGTAGTGGGATATCAGACC
742	hsa-mir-25_742	miRNA_hsa-mir-25	GCACTTGTCTCGGTCTGAT
743	hsa-mir-95_743	miRNA_hsa-mir-95	ATTCAACGGGTATTTATTGAGA
744	RP11-107D16.2-001_744	protein_coding_RP11-107D16.2-001	GTCTCTCTGCCCCTGCCC
745	hsa-mir-652_745	miRNA_hsa-mir-652	ATGGCGCCACTAGGGTTGTAT
746	hsa-mir-2355_746	miRNA_hsa-mir-2355	ATTGTCCTTGCTGTTTGGAGATAAT
747	hsa-mir-654_747	miRNA_hsa-mir-654	TATGTCTGCTGACCATCAA
748	ENST00000387441.1_748	other_TMapped_ENST00000387441.1	TCAGATTGTGAATCTGACAACAGAGGCTTACGA
749	hsa-mir-125a_749	miRNA_hsa-mir-125a	CTCCCTGAGACCCTTTAACCTGTGA
750	hsa-mir-93_750	miRNA_hsa-mir-93	AAAGTGCTGTTCGTACAGGTAG
751	hsa-mir-328_751	miRNA_hsa-mir-328	CTGGCCCTCTCTGCCCTTTCG
752	hsa-mir-425_752	miRNA_hsa-mir-425	AATGACACGATCACTCCCGTTGGT
753	ENST00000512279.1_753	other_TMapped_ENST00000512279.1	CCTCTTTACAGTGAAAAAAAAA
754	ENST00000389680.2_754	other_TMapped_ENST00000389680.2	TCAAAGGACATTTAACTAAAACCCCTA
755	PSD3-204_755	protein_coding_PSD3-204	TCTCCTCCTGAGATTCAGCG
756	AL773602.10-001_756	protein_coding_AL773602.10-001	TTCGCCTCCCTGCAGCGCCCCCA
757	RNY4P18-201_757	YRNA_RNY4P18-201	CCCCCACTGCTAAATTTGACTGGCTTAATTT
758	PUM2-203_758	protein_coding_PUM2-203	TTCGGAGGAGGAGGGGGAG
759	hsa-mir-335_759	miRNA_hsa-mir-335	TCAAGAGCAATAACGAACAATGT
760	RP11-536K7.1-001_760	protein_coding_RP11-536K7.1-001	GATACCCCTGTAGTCCTAGCC
761	RNY4-201_761	YRNA_RNY4-201	TATACAACCTCCCACTGCTAAATTTGACTGGCTTT
762	hsa-mir-574_762	miRNA_hsa-mir-574	TTAGTGTGTGTGTGTGAGTGTG
763	hsa-mir-6892_763	miRNA_hsa-mir-6892	GTAAGGGACCGGAGAGTAGG
764	hsa-let-7b_764	miRNA_hsa-let-7b	TGAGGTAGTAGGTTGTCTGGTTGA
765	hsa-mir-16-2_765	miRNA_hsa-mir-16-2	TCGCAGCACGTAAATATTGG
766	ENST00000387449.1_766	other_TMapped_ENST00000387449.1	GAGAACGCTCACAAGAACTGCTAACTCATGCCCCC
767	RP1-68D18.1-001_767	protein_coding_RP1-68D18.1-001	AAAGAGGCTGAGACAGGAGG
768	tRNA-Ser-GCT-1-1_768	tRNA_tRNA-Ser-GCT-1-1	TGGGTTCGAATCCCACCCTCATCA
769	hsa-mir-22_769	miRNA_hsa-mir-22	AAGCTGCCAGTTGAAGACCTT
770	AC099518.3-002_770	protein_coding_AC099518.3-002	TGATTTCTGCCCAGTGCCTT
771	tRNA-Thr-TGT-6-1_771	tRNA_tRNA-Thr-TGT-6-1	TCAGGGGTTAGAGCACTG
772	RP11-506K6.2-005_772	protein_coding_RP11-506K6.2-005	GGCGCTGGCCAGCGCGGGCT
773	tRNA-Leu-CAG-1-1_773	tRNA_tRNA-Leu-CAG-1-1	GGTCGGATGGCCGAGCGGTCTAAG
774	hsa-mir-493_774	miRNA_hsa-mir-493	TTGTACATGGTAGGCTCTCATTT
775	hsa-mir-486-1_775	miRNA_hsa-mir-486-1	CGGGGCAGCTCAGTACAGGATAAA
776	hsa-mir-3184_776	miRNA_hsa-mir-3184	TTAGGGGCAGAGAGCGAGACTTTT
777	RNY4P17-201_777	YRNA_RNY4P17-201	GGCTGGTCCGATGGTAGCGGGTTATGAGAACA
778	ENST00000469942.1_778	other_TMapped_ENST00000469942.1	TTGGATTTATTGAATACTAACT
779	hsa-mir-576_779	miRNA_hsa-mir-576	ATTCTAATTTCTCCACGTCCTTG
780	ENST00000387347.2_780	other_TMapped_ENST00000387347.2	TTGTAGAGAGAGTAAAAAATT
781	RNY3-201_781	YRNA_RNY3-201	TCCGAGTGCAGTGGTGTTTACAACTAATTGA
782	ENST00000318426.6_782	other_TMapped_ENST00000318426.6	CATCTCCCAAGGCTAAATAC
783	hsa-mir-4446_783	miRNA_hsa-mir-4446	CAGGGCAGGCAGTGACATGGGT
784	hsa-mir-652_784	miRNA_hsa-mir-652	TGGCGCCACTAGGGTTGTGT
785	tRNA-His-GTG-1-1_785	tRNA_tRNA-His-GTG-1-1	GGCCGTGATCGTATAGGGGTTAGTACTCTGCGT
786	hsa-mir-340_786	miRNA_hsa-mir-340	ACGTCTCAGTTACTTTATAGCC
787	hsa-mir-3184_787	miRNA_hsa-mir-3184	GAGCTCGGTCTGAGGCCCCTCAG
788	hsa-mir-150_788	miRNA_hsa-mir-150	TCCCAACCCTTGTACCAGTGT
789	TUBA1C-210_789	protein_coding_TUBA1C-210	TTGCCACCATCAAAACCAAGCGTACC
790	RP5-1018E9.1-001_790	protein_coding_RP5-1018E9.1-001	CCTCTTCCTCCAGCCTCTGA
791	hsa-mir-106b_791	miRNA_hsa-mir-106b	CCGCACTGTGGGTACTTGCTGCTG
792	AC008821.1-004_792	protein_coding_AC008821.1-004	GGGGGAGGGGGAAAAAAAAA
793	RP5-1065O2.3-002_793	protein_coding_RP5-1065O2.3-002	CCCTCTCTGCCGTGGGCGT
794	hsa-mir-19a_794	miRNA_hsa-mir-19a	TATGCAAATCTATGCAAAACTGA
795	RP11-320E16.1-002_795	protein_coding_RP11-320E16.1-002	GGGGATGTGGCGGAATTGGCA
796	RNY4P10-201_796	YRNA_RNY4P10-201	TGGTCCGATGGTAGTGGGTGATCAGAACA
797	AC009497.1-001_797	protein_coding_AC009497.1-001	TAAGAGCGTGAACCCTATTGTG
798	RNY3-201_798	YRNA_RNY3-201	CTCCACTCACACTGCTTCACTTGACTAGCCTT
799	hsa-mir-191_799	miRNA_hsa-mir-191	CTGCGCTTGGATTTCGTCCCCCTT
800	hsa-mir-320c-2_800	miRNA_hsa-mir-320c-2	AAAAGCTGGGTTGAGAGGGAAAAT
801	hsa-mir-324_801	miRNA_hsa-mir-324	CCACTGCCCCAGGTGCTGCT
802	tRNA-iMet-CAT-1-8_802	tRNA_tRNA-iMet-CAT-1-8	ATAACCCAGAGGTCGATGGATCGTAACCATCC
803	hsa-mir-4433a_803	miRNA_hsa-mir-4433a	CAGAGTGGGGGGTGGGACGT
804	hsa-mir-26a-2_804	miRNA_hsa-mir-26a-2	TTCAAGTAATCCAGGATAGT
805	hsa_piR_016659|gb|DQ592932|Homo_sapiens_805	piRNA_hsa_piR_016659|gb|DQ592932|Homo_sapiens	CCCCCCACTGCTAAATTTGACTGATTTT
806	hsa-mir-16-1_806	miRNA_hsa-mir-16-1	TGGCAGCACGTAAATATTGGCGTT
807	AC092849.8-001_807	protein_coding_AC092849.8-001	GCCCCCGCCCGGACCGAGG
808	ENST00000387347.2_808	other_TMapped_ENST00000387347.2	ATTACCCTCACTGTCAACCCAACACAGGCAT
809	hsa_piR_021214|gb|DQ599147|Homo_sapiens_809	piRNA_hsa_piR_021214|gb|DQ599147|Homo_sapiens	GGTCGCGGGTTCGAGCCCC
810	hsa-mir-92b_810	miRNA_hsa-mir-92b	TATTGCACTCGTCCCGGCCTCGA
811	CTD-3214H19.3-006_811	protein_coding_CTD-3214H19.3-006	CAAAGGTGGTGAAGACGTTGAAGGAGAT
812	ENST00000387347.2_812	other_TMapped_ENST00000387347.2	TGGAGCTTTAATTTATTAATGCAAACAGTACCA
813	RNY3-201_813	YRNA_RNY3-201	GGTCCGAGTGCAGTGGTGTTTACAACTAAT
814	ENST00000387347.2_814	other_TMapped_ENST00000387347.2	TCAGCTGTCTCTTACTTTTAACC
815	AC125362.3-001_815	protein_coding_AC125362.3-001	AGAGCTCTTGCCATTTTTTCCCTTGC
816	ENST00000615679.1_816	other_TMapped_ENST00000615679.1	TTAAAGACCAATTGATTTTGAC
817	RP11-46C24.4-001_817	protein_coding_RP11-46C24.4-001	TAAATCCTGGATGGACAGACCCG
818	AC007881.3-001_818	protein_coding_AC007881.3-001	ATTTACAACTTTCAACAACG
819	hsa-mir-101-1_819	miRNA_hsa-mir-101-1	TACAGTACTGTGATAACTGAGA
820	hsa-mir-16-2_820	miRNA_hsa-mir-16-2	CTAGCAGCGCGTAAATATTGGCG
821	IL6R-208_821	protein_coding_IL6R-208	CTGACACTGAGCCGGACCAGA
822	hsa-mir-15a_822	miRNA_hsa-mir-15a	TAGCAGCACATAATGGTATGTG
823	AC120349.1-001_823	protein_coding_AC120349.1-001	CTAAGTAGGAGGAGGAGA
824	ENST00000481511.5_824	other_TMapped_ENST00000481511.5	TGCGGTGGGTACTGGCAGA
825	hsa-mir-146a_825	miRNA_hsa-mir-146a	TGAGAACTGAATTCCATGGGTTCAA
826	ENST00000445125.2_826	other_TMapped_ENST00000445125.2	TTAGTTGGTGGAGTGATTTTTCTGCT
827	tRNA-His-GTG-1-9_827	tRNA_tRNA-His-GTG-1-9	AGTGGTTAGTACTCTGCGTTGTGGCNGCAGCA
828	ENST00000387459.1_828	other_TMapped_ENST00000387459.1	TCGTGGTTGTAGTACGTGCGAGAATACC
829	RP5-1000E10.3-015_829	protein_coding_RP5-1000E10.3-015	TGTCGAAGGGAACGTTCAGCTGG
830	RNY4P10-201_830	YRNA_RNY4P10-201	GGCTGGACCGNTGGTAGTGGGTTATCAGAACT
831	tRNA-Glu-CTC-1-1_831	tRNA_tRNA-Glu-CTC-1-1	TCCCTGGCGGTCTAGTGGTTAGGATTCGGCG
832	ENST00000431311.1_832	other_TMapped_ENST00000431311.1	TCCCCGGCACCTCCACCACA
833	ENST00000626826.1_833	other_TMapped_ENST00000626826.1	AGTGAAATAGACCCTGAAACCA
834	ENST00000365439.1_834	other_TMapped_ENST00000365439.1	TTCTCCACTCCCACTGCTTCACCTGACTAGA
835	hsa_piR_016659|gb|DQ592932|Homo_sapiens_835	piRNA_hsa_piR_016659|gb|DQ592932|Homo_sapiens	CCCCACTGCTAAATTTGACTGGTTTC
836	ENST00000580533.1_836	other_TMapped_ENST00000580533.1	GGAGGGAGAGAACGCGGTC
837	ENST00000564774.5_837	other_TMapped_ENST00000564774.5	TGGAGGCTGATGGGAGAT
838	hsa-mir-1307_838	miRNA_hsa-mir-1307	CTCGGCGTGGCGTCGGTCGTGGTCT
839	ENST00000387347.2_839	other_TMapped_ENST00000387347.2	ATAAGACTGCGTCAGATTAAAACACT
840	RP11-18O13.1-001_840	protein_coding_RP11-18O13.1-001	GAGGAAAAGAAACCAACAGGG
841	ENST00000493133.1_841	other_TMapped_ENST00000493133.1	AATGGGAAGGACAGAGGGCTGCAAAN
842	hsa-mir-93_842	miRNA_hsa-mir-93	AAGTGCTGTTCGTGCGGGTAG
843	ENST00000510511.2_843	other_TMapped_ENST00000510511.2	CTAAATATTCCTGAATGACC
844	hsa-mir-425_844	miRNA_hsa-mir-425	ATGACACGATCACTCCCGTTGAGTAC
845	hsa-mir-182_845	miRNA_hsa-mir-182	TTTGGCAATGGTAGAACTCACACTT
846	hsa-mir-21_846	miRNA_hsa-mir-21	ATAGCTTATCAGACTGATGT
847	RP11-846F4.3-001_847	protein_coding_RP11-846F4.3-001	TCCCAAGAACAGGGTTTGTTAA
848	hsa-mir-484_848	miRNA_hsa-mir-484	TCAGGCTCAGTCCCCTCCCGATGTT
849	tRNA-Gly-CCC-2-2_849	tRNA_tRNA-Gly-CCC-2-2	TTGCGACCCGGGTTCGATTCCCGGGCGGCGCACCA
850	hsa-mir-26a-2_850	miRNA_hsa-mir-26a-2	TTCAAGTAATCCAGGATACGCC
851	hsa-mir-3615_851	miRNA_hsa-mir-3615	CTCTCGGCTCCTCGCGGCTCC
852	RP11-125E8.5-039_852	protein_coding_RP11-125E8.5-039	CGGGCTGTAGCTCCGCTTGGTAG
853	RP11-861M13.4-004_853	protein_coding_RP11-861M13.4-004	ACAAGAAGAGGGAGCTGAA
854	hsa-mir-1307_854	miRNA_hsa-mir-1307	TCGACCGGACCTCGACCGGCTCTTC
855	RNY4P10-201_855	YRNA_RNY4P10-201	GGCTGGTCCGATAGTAGTGGGTTATCAGAGCA
856	tRNA-Gln-CTG-2-1_856	tRNA_tRNA-Gln-CTG-2-1	GAGTTCAAGTCTCGGTAGAACCTCCA
857	hsa-mir-128-1_857	miRNA_hsa-mir-128-1	CTCACAGTGAACCGGTCTCTTTTT
858	PAQR5-201_858	protein_coding_PAQR5-201	TTCTAACTACTGCACTTGACTAGTCTTA
859	MT-ND4-201_859	protein_coding_MT-ND4-201	CAAGGACTTCAAACTCTACTCCC
860	hsa-mir-616_860	miRNA_hsa-mir-616	AGTCATTGGAGGGTTTGCGCAG
861	hsa-mir-369_861	miRNA_hsa-mir-369	AATAATACATGGTTGACCTTT
862	hsa-mir-132_862	miRNA_hsa-mir-132	TAACAGTCTACAGCCATGCTCG
863	ENST00000469129.1_863	other_TMapped_ENST00000469129.1	GAGCTCACAGTCTAGTAG
864	DKC1-213_864	protein_coding_DKC1-213	AGTGGCGAGTTCTTCTGTCCAGC
865	ENST00000365267.1_865	other_TMapped_ENST00000365267.1	GGCTGATCCGAGTGCAGTGG
866	hsa-mir-146a_866	miRNA_hsa-mir-146a	TTGAGAACTGAATTCCATGGGTTTAA
867	RNY4P20-201_867	YRNA_RNY4P20-201	TGGTCCGATGGTAGTGGGTTATCAGAAATA
868	AP001468.6-010_868	protein_coding_AP001468.6-010	GACGCCACCGACCTCGGCCG
869	ENST00000536009.1_869	other_TMapped_ENST00000536009.1	AAGTGTGGGGAGCAAACAGGA
870	RNY4P9-201_870	YRNA_RNY4P9-201	ACAACACCCCACTGCTAAATTTGAATGGCTT
871	hsa-mir-320d-1_871	miRNA_hsa-mir-320d-1	AAAAGCTGGGTTGAGAGGACGAC
872	ENST00000362539.1_872	other_TMapped_ENST00000362539.1	GTGCAGTGGTGTTTACAACA
873	ENST00000387347.2_873	other_TMapped_ENST00000387347.2	TAACTGAACTCCTCACACCCAATTGGATCA
874	ENST00000482892.1_874	other_TMapped_ENST00000482892.1	CACGCCTGTCTCAGGAACGG
875	RP11-6D1.4-002_875	protein_coding_RP11-6D1.4-002	CTGGACAAAGACAAGCTGAGGGAC
876	RP11-727A23.3-001_876	protein_coding_RP11-727A23.3-001	GATCAGTAGCTGGTCTGAGA
877	hsa-let-7f-2_877	miRNA_hsa-let-7f-2	GAGGTAGTAGATTGTATGGTT
878	ENST00000389680.2_878	other_TMapped_ENST00000389680.2	CAGAAAACTACGATAGCCCGTATGAAACT
879	hsa_piR_012681|gb|DQ587153|Homo_sapiens_879	piRNA_hsa_piR_012681|gb|DQ587153|Homo_sapiens	TGGAGGTGATGCACTGTCTGAGCCTGACC
880	hsa-mir-1307_880	miRNA_hsa-mir-1307	TCGATCGGACCTCGACCGGCTC
881	hsa-mir-23b_881	miRNA_hsa-mir-23b	CATCACATTGCCAGGGATTACC
882	AL773603.10-003_882	protein_coding_AL773603.10-003	CGAGCCCGTCAGGACCCACCA
883	MT-ND5-201_883	protein_coding_MT-ND5-201	TTTAAGTTTGTTGGTTAGGTAGTTGA
884	AC097461.5-001_884	protein_coding_AC097461.5-001	CCAATAAAGTAGAAAGCACT
885	RP11-350M7.1-004_885	protein_coding_RP11-350M7.1-004	TCTGGCTGAGGAGGAAGTGGTTT
886	ENST00000445125.2_886	other_TMapped_ENST00000445125.2	AGTTGGTGGAGTGATTTGTCTGCTTAA
887	RP5-1171I10.6-005_887	protein_coding_RP5-1171I10.6-005	GTGGGGTGGGAGGGATTTGGGTTGGTGGATTAA
888	ENST00000461762.5_888	other_TMapped_ENST00000461762.5	AAAAAAAAAAGAGAGGGGAGAG
889	AC073842.15-010_889	protein_coding_AC073842.15-010	AAGCTGGCGACTGAAGCCCCGG
890	hsa-mir-25_890	miRNA_hsa-mir-25	CATTGCACTTGTCTCGGTCTGTCT
891	hsa-mir-5010_891	miRNA_hsa-mir-5010	CAGGGGGATGGCAGAGCAAAA
892	RNY3P2-201_892	YRNA_RNY3P2-201	TCCAACTGCTTCACTTGACTAGCCTA
893	hsa-mir-324_893	miRNA_hsa-mir-324	GTGCATCCCCTAGGGCATTGGTG
894	MT-ND4-201_894	protein_coding_MT-ND4-201	AGTTCTGTGGCTGTGAAT
895	hsa-mir-21_895	miRNA_hsa-mir-21	TNTCTTATCAGACTGATGTTGA
896	tRNA-Gly-CCC-2-2_896	tRNA_tRNA-Gly-CCC-2-2	GCGCCGCTGGTGTAGTGGGATCATGCAAGATT
897	ENST00000387342.1_897	other_TMapped_ENST00000387342.1	TTCAACTTAACTTGACCGCTCTGACCAC
898	RNY3P2-201_898	YRNA_RNY3P2-201	CGGCTTCACTTGACTAGCCTA
899	RP5-940J5.7-051_899	protein_coding_RP5-940J5.7-051	TTGGTTTTATTTTGTTGGTTTCTAG
900	ENST00000451960.1_900	other_TMapped_ENST00000451960.1	CTGGAGTGCAAGACCGCGGACTATGGC
901	ICA1-207_901	protein_coding_ICA1-207	ATATCTTTTCTGTTTAATTAATATG
902	AC019052.2-002_902	protein_coding_AC019052.2-002	GCAGAGCTTCGATGGTGAGAGT
903	ENST00000389680.2_903	other_TMapped_ENST00000389680.2	CAAGTCAATAGAAGCCGGCGTAA
904	RP11-245B11.3-001_904	protein_coding_RP11-245B11.3-001	GACTTTTACTGTGAAAAATTAG
905	ENST00000364535.1_905	other_TMapped_ENST00000364535.1	GGCTGGTCCGATGGTAGTGGGTTACCAGAACAA
906	ENST00000387347.2_906	other_TMapped_ENST00000387347.2	ATTATTACCCTCACTGTCAAC
907	ENST00000527603.5_907	other_TMapped_ENST00000527603.5	TTCCCTCTCTGTCCCCCGCTTTT
908	RNY4P10-201_908	YRNA_RNY4P10-201	GGCTGGTCCGATGGTAGTNGGTTATCAGAACA
909	RP11-700F16.4-007_909	protein_coding_RP11-700F16.4-007	TGCTCCCCGGCCGGCTGTC
910	hsa-mir-486-2_910	miRNA_hsa-mir-486-2	TCCTTNACTGAGCTGCCCCGA
911	hsa-mir-30e_911	miRNA_hsa-mir-30e	GTAAACATCCTTGGCTGGAAG
912	RNY4P7-201_912	YRNA_RNY4P7-201	TGGGCTGGTCCGATGGTAGTGGGTTATCAGAACTT
913	hsa-mir-146a_913	miRNA_hsa-mir-146a	TGAGAACTGAATTCCATGGGC
914	ENST00000606274.1_914	other_TMapped_ENST00000606274.1	CGACTCCCCGCTTCGGAGC
915	RP11-650K20.1-001_915	protein_coding_RP11-650K20.1-001	ACTCGGGAGCCTGAGGCACGAAAA
916	hsa-mir-505_916	miRNA_hsa-mir-505	TCGACACTTGCTGGTTTCCTCT
917	AC137056.6-001_917	protein_coding_AC137056.6-001	TCTTCAACTTTGTACTTCA
918	hsa_piR_020498|gb|DQ598180|Homo_sapiens_918	piRNA_hsa_piR_020498|gb|DQ598180|Homo_sapiens	GGGGTATAGCTCAGTTGGTAGAGCGC
919	hsa-mir-18b_919	miRNA_hsa-mir-18b	AAGGTGCATCTAGTGCAGTTAG
920	hsa-mir-126_920	miRNA_hsa-mir-126	TTATTACTTTTGGTACGCGCTTT
921	ENST00000387441.1_921	other_TMapped_ENST00000387441.1	ATCAGATTGTGAATCTGACAACAGAGGC
922	RP11-770G2.9-018_922	protein_coding_RP11-770G2.9-018	CTATCCATGGGCAGGTTGAAGCGG
923	ENST00000365068.1_923	other_TMapped_ENST00000365068.1	GGCTGGTCCGATGGTAGTAGGTCATCAGAACA
924	RP3-481F12.6-001_924	protein_coding_RP3-481F12.6-001	CCCAAGAACAGGGTTTGTTAA
925	AP000609.4-001_925	protein_coding_AP000609.4-001	AGAGCCGAGGAGGCGGGGAGGC
926	hsa-mir-30a_926	miRNA_hsa-mir-30a	TGTAAACATNCTCGACTGGAAGCT
927	ENST00000387460.2_927	other_TMapped_ENST00000387460.2	TGTCCTTGGAAAAAGGTTTTCATCTCCGGT
928	hsa-mir-95_928	miRNA_hsa-mir-95	TTCAACGGGTATCTATTGAGCA
929	hsa-mir-618_929	miRNA_hsa-mir-618	AAACTCTACTTGTCCTTCTG
930	tRNA-Asp-GTC-3-1_930	tRNA_tRNA-Asp-GTC-3-1	CGCGGGAGACCGGGGTTCGATTCCCCGACGGGGC
931	AC046143.1-001_931	protein_coding_AC046143.1-001	AGACACTGGCCAGGCACCTACG
932	CTB-180A7.1-006_932	protein_coding_CTB-180A7.1-006	CCTGAGGAGGACAAGGAGGAGGAGGAGGATT
933	ENST00000410856.1_933	other_TMapped_ENST00000410856.1	TGTAGTATCTGTTCTTATCAGCTTAA
934	tRNA-His-GTG-1-1_934	tRNA_tRNA-His-GTG-1-1	GGACGTGATCGTATAGTGGTTAGTACTCTGCGTT
935	AC009061.11-001_935	protein_coding_AC009061.11-001	AAATCTCTTGTAGAACAAAAGG
936	ENST00000636709.1_936	other_TMapped_ENST00000636709.1	CTTCGTATGGGAGTGTTCGGG
937	hsa-let-7d_937	miRNA_hsa-let-7d	AGAGGTAGTAGGTTGCATAGTGAT
938	hsa-let-7f-1_938	miRNA_hsa-let-7f-1	GTGAGGTAGTAGATTGTATAGTAT
939	hsa-mir-10399_939	miRNA_hsa-mir-10399	TCTCTCGGACAAGCTATAGGTT
940	hsa-mir-766_940	miRNA_hsa-mir-766	NCTCCAGCCCCACAGCCTCAGC
941	RNY4P10-201_941	YRNA_RNY4P10-201	GGCTGGTCCGATGGTATTGGGTTATCAGAACCT
942	RP11-752G15.5-002_942	protein_coding_RP11-752G15.5-002	AGGTAGATAGAACAGGTCTTGTAA
943	hsa-mir-654_943	miRNA_hsa-mir-654	GATGTCTGCTGACCATCACCT
944	ENST00000410482.1_944	other_TMapped_ENST00000410482.1	TGCAGTACCTCCAGGAACGGTGC
945	ENST00000517148.1_945	other_TMapped_ENST00000517148.1	TTAGTACTTGGATGGGTG
946	tRNA-Asp-GTC-1-1_946	tRNA_tRNA-Asp-GTC-1-1	TCACGCGGGAGACCGGGGTTCGT
947	ENST00000387347.2_947	other_TMapped_ENST00000387347.2	GAACTGACAATTAACAGCCC
948	ENST00000362881.1_948	other_TMapped_ENST00000362881.1	TCCCAATGCTTCACTTGACTAAT
949	RP11-823O21.1-005_949	protein_coding_RP11-823O21.1-005	CAGGGACAGTCGGGGGCATTCG
950	hsa-mir-125a_950	miRNA_hsa-mir-125a	TCCCTGAGACCCTTTAACCCGTGT
951	hsa-mir-452_951	miRNA_hsa-mir-452	GTTTGCAGAGGAAACTGAG
952	AC005231.2-006_952	protein_coding_AC005231.2-006	GGGACCCTCTGGTGGACGCTC
953	hsa-mir-29a_953	miRNA_hsa-mir-29a	GCACCATCTGAAATCGGTA
954	ENST00000564066.1_954	other_TMapped_ENST00000564066.1	ACCGCGGGGCCCAGGGTTCG
955	CTD-2278I10.2-001_955	protein_coding_CTD-2278I10.2-001	CGAGGAGGAAGAGGAGGAC
956	hsa-let-7a-3_956	miRNA_hsa-let-7a-3	TGAGGTAGTAGATTGTATAGTTTGGGA
957	hsa-mir-223_957	miRNA_hsa-mir-223	CGTGTATTTGACAAGCTGGGTTGG
958	hsa-mir-6513_958	miRNA_hsa-mir-6513	TCAAGTGTCATCTGTCTCTAGA
959	hsa-let-7f-1_959	miRNA_hsa-let-7f-1	TGAGGCAGTAGATTGTATAGTTGT
960	ENST00000384686.1_960	other_TMapped_ENST00000384686.1	ACTTCCACTGCTTCACTTGACTAGTT
961	ENST00000609581.1_961	other_TMapped_ENST00000609581.1	AAGCCAGCCTGACTGCGAGAC
962	hsa_piR_016742|gb|DQ593049|Homo_sapiens_962	piRNA_hsa_piR_016742|gb|DQ593049|Homo_sapiens	CCCGTCTAGCTCAGTCGGTAGA
963	tRNA-Glu-CTC-1-7_963	tRNA_tRNA-Glu-CTC-1-7	TCCCTGGTGGTCTAGTGGTTAGGATNAGGCGCTCT
964	hsa-mir-128-1_964	miRNA_hsa-mir-128-1	TCACAGTGAACCGGTCGCTTT
965	ENST00000539508.5_965	other_TMapped_ENST00000539508.5	TTAGTAGCTGTAGGAAGAGAAA
966	hsa-mir-484_966	miRNA_hsa-mir-484	TCAGGCTCAGTCCCCTCCTGATTA
967	ENST00000387409.1_967	other_TMapped_ENST00000387409.1	TTAGGCCTCTTTTTACCA
968	tRNA-Lys-CTT-1-2_968	tRNA_tRNA-Lys-CTT-1-2	TCTTAATCCCAGGGTCGTGG
969	RP11-469L3.1-001_969	protein_coding_RP11-469L3.1-001	ATTCAGATAATTGGTTTTTGC
970	ENST00000454224.1_970	other_TMapped_ENST00000454224.1	ACCTTACTGTAGCTTTGCATT
971	hsa-mir-4433a_971	miRNA_hsa-mir-4433a	GAGTGGGGGGTGGGACGTAAGGA
972	RNY4P10-201_972	YRNA_RNY4P10-201	GGTCCGATGGTAGTGGATTATCA
973	hsa-mir-186_973	miRNA_hsa-mir-186	AATTCTCCTTTTGGGCTTAA
974	hsa-mir-30d_974	miRNA_hsa-mir-30d	TGTAAACATCCCCGACTGGAACTG
975	hsa-mir-12136_975	miRNA_hsa-mir-12136	GAAAAAGTCATGGAGGCCACGGGGTTGAA
976	ENST00000561949.1_976	other_TMapped_ENST00000561949.1	TTCTGGAGGGATGGGTAGGAGCCTT
977	hsa-mir-126_977	miRNA_hsa-mir-126	CGTACCGTGAGTAATAATGCTA
978	RP4-747G18.3-001_978	protein_coding_RP4-747G18.3-001	AGCGTGCTGAAGCCGGAGCGAGC
979	RP11-542K23.6-001_979	protein_coding_RP11-542K23.6-001	TAAAAACTGGCCCGTGGAGACTGA
980	AC004839.4-007_980	protein_coding_AC004839.4-007	GAGCCCACCTGGCGAACTGA
981	hsa_piR_004309|gb|DQ575884|Homo_sapiens_981	piRNA_hsa_piR_004309|gb|DQ575884|Homo_sapiens	GTTTCCGTAGTATAGTGGTTATCACGTTCGCCTGA
982	AC027318.6-001_982	protein_coding_AC027318.6-001	CACGCTCCTGAGACACCAG
983	ENST00000387372.1_983	other_TMapped_ENST00000387372.1	GGACTCTGAGAATCGAACCCATCCCTGAGAATC
984	hsa-let-7i_984	miRNA_hsa-let-7i	GTAGTAGTTTGTGCTGTT
985	hsa-mir-12136_985	miRNA_hsa-mir-12136	GAAAAAGTCATGGAGGTCATGGGGTT
986	ENST00000363331.1_986	other_TMapped_ENST00000363331.1	CCCCCCACTGCTAAATTTGACTAGCGT
987	RP11-215L17.2-001_987	protein_coding_RP11-215L17.2-001	AACAGCTCTTTGGACACTAGGA
988	hsa-mir-199a-1_988	miRNA_hsa-mir-199a-1	AGTAGTCTGCACATTGGTTAGGC
989	hsa-mir-330_989	miRNA_hsa-mir-330	GCAAAGCACACGGCCCGCAGAGA
990	ENST00000613956.1_990	other_TMapped_ENST00000613956.1	CCTTTCTCGGCCTTTTGGCTAA
991	AC135050.2-002_991	protein_coding_AC135050.2-002	CCTCCTGTCCTGTCCCCCTGCCCACCT
992	hsa-mir-584_992	miRNA_hsa-mir-584	GTATGGTTTGCCTGGGACTGA
993	ENST00000470839.1_993	other_TMapped_ENST00000470839.1	TTAAAATTTGTATATGATAT
994	hsa_piR_019949|gb|DQ597397|Homo_sapiens_994	piRNA_hsa_piR_019949|gb|DQ597397|Homo_sapiens	GCCCGGATAGCTCAGTTGGTAGAGC
995	AC004258.6-032_995	protein_coding_AC004258.6-032	AAAGATTGTGGGAGCTTCGCTG
996	hsa-mir-877_996	miRNA_hsa-mir-877	GTGGAGGAGATGGCGCAGGG
997	RP11-255O17.2-004_997	protein_coding_RP11-255O17.2-004	TCGAGTCCGAGCTCCCCTGCC
998	AC104759.1-001_998	protein_coding_AC104759.1-001	ATATTTGGTAGGGACCTTGACAG
999	ENST00000387429.1_999	other_TMapped_ENST00000387429.1	TAAATAGTACCGTTAACTTCCAATTAACGACCA
1000	hsa-mir-25_1000	miRNA_hsa-mir-25	CATTGCACTTGTCTCGGTCTAC
1001	AC018512.4-004_1001	protein_coding_AC018512.4-004	CTGAACCTGCAACCCCGTGCCT
1002	hsa-mir-3186_1002	miRNA_hsa-mir-3186	AAGCCATCTCTCCGCGTGACT
1003	hsa-mir-98_1003	miRNA_hsa-mir-98	TGAGGTAGTAAGTTGTATTTTTA
1004	AC004612.2-009_1004	protein_coding_AC004612.2-009	GACTTTTCAACTCACCTGGCAGCCACTCCCAGAG
1005	tRNA-Asp-GTC-3-1_1005	tRNA_tRNA-Asp-GTC-3-1	ACGCGGGAGACCGGGGTTCGATTCCCCGTCGGA
1006	ENST00000572638.1_1006	other_TMapped_ENST00000572638.1	TAATCCAAAGCTTCTGACTG
1007	hsa-mir-103b-1_1007	miRNA_hsa-mir-103b-1	AGCAGCATTGTACAGGGATAAAA
1008	RP11-68C8.3-001_1008	protein_coding_RP11-68C8.3-001	CGTTAAAGGAACTCGGCAAA
1009	hsa_piR_001152|gb|DQ571500|Homo_sapiens_1009	piRNA_hsa_piR_001152|gb|DQ571500|Homo_sapiens	GTTCGTGATGGATTTGCTTTTTTCTGAT
1010	hsa-mir-223_1010	miRNA_hsa-mir-223	GTCAGTTTGTCAAATACCCCATGA
1011	ENST00000387441.1_1011	other_TMapped_ENST00000387441.1	TGAATCTGACAACAGAGGCTTACGAGCCCT
1012	ENST00000387314.1_1012	other_TMapped_ENST00000387314.1	GTTTATGTAGCTTACCTCCCCAAAGCACCA
1013	hsa_piR_016659|gb|DQ592932|Homo_sapiens_1013	piRNA_hsa_piR_016659|gb|DQ592932|Homo_sapiens	CACTGCTAAATTTGACTGGTAAA
1014	hsa-let-7f-1_1014	miRNA_hsa-let-7f-1	TATACAATCTATTGCCTTC
1015	tRNA-Arg-CCG-2-1_1015	tRNA_tRNA-Arg-CCG-2-1	CTGGGGATTGTGGGTTCGTGTCCCATCTGGGTCG
1016	tRNA-Val-AAC-1-1_1016	tRNA_tRNA-Val-AAC-1-1	AGTTTCCGTAGTGTAGTGGTTA
1017	hsa-mir-30a_1017	miRNA_hsa-mir-30a	GTAAACATCCTCGAGTGGAAGCT
1018	ENST00000387347.2_1018	other_TMapped_ENST00000387347.2	GTTCAGACCGGAGTAATCCAGGTCGG
1019	hsa_piR_014620|gb|DQ590013|Homo_sapiens_1019	piRNA_hsa_piR_014620|gb|DQ590013|Homo_sapiens	TCGCGGTTGTAGTCCGTGCGAG
1020	RP11-582M4.2-001_1020	protein_coding_RP11-582M4.2-001	TAACTTTGGGCCAGGTGCGGTGG
1021	AC011737.1-001_1021	protein_coding_AC011737.1-001	ACTGGTACGAACAAGGGGAATC
1022	RP11-470C13.2-008_1022	protein_coding_RP11-470C13.2-008	CTGGAGCCGAAGAAGGACG
1023	hsa_piR_020500|gb|DQ598190|Homo_sapiens_1023	piRNA_hsa_piR_020500|gb|DQ598190|Homo_sapiens	GGGTGTAACTCAGTGGTAGAG
1024	tRNA-Leu-CAG-2-2_1024	tRNA_tRNA-Leu-CAG-2-2	CGAATCCCACTTCTGACACCA
1025	hsa-mir-30c-2_1025	miRNA_hsa-mir-30c-2	TGTAAACATCCTACACTCTCAGCTCTT
1026	hsa-mir-590_1026	miRNA_hsa-mir-590	TAATTTTATGTATAAGCTAGTCTT
1027	RNY1P13-201_1027	YRNA_RNY1P13-201	CCCCCTTCTCACTACTGCACTTGACTAAT
1028	RNY1-201_1028	YRNA_RNY1-201	GGCGGGTCCGAAGGTAGTGAGTTATCTCAA
1029	ENST00000473689.5_1029	other_TMapped_ENST00000473689.5	TGACAGCCACCTTTCCCCGCCATT
1030	RP11-367C15.2-010_1030	protein_coding_RP11-367C15.2-010	AAAGAGAAGGAGAAAGAGAAGGAAAAAGAAGA
1031	RNY3-201_1031	YRNA_RNY3-201	GCTCCCACTGCTTCACTTGACTAG
1032	hsa-mir-28_1032	miRNA_hsa-mir-28	AGCTCACAGTCTATTGAGA
1033	RNY4P27-201_1033	YRNA_RNY4P27-201	GGTCCGATGGTAGTGGGTTGTCAGAAC
1034	hsa-mir-10399_1034	miRNA_hsa-mir-10399	AACTACAGATTGTCTCAGAGA
1035	hsa-mir-328_1035	miRNA_hsa-mir-328	CTGGCCCTCTCTGCCCTTCCCTTT
1036	hsa-mir-140_1036	miRNA_hsa-mir-140	ACCACACGGTAGAACCACGGAC
1037	ENST00000387400.1_1037	other_TMapped_ENST00000387400.1	TGTTGACTAAGTGTTTGTGGGTTT
1038	hsa-mir-451b_1038	miRNA_hsa-mir-451b	AGACAGTTACCATTACTGAGTTT
1039	RP11-102M2.1-004_1039	protein_coding_RP11-102M2.1-004	GCTTTTCCTCCGCAACCATGTCTGACAAACCC
1040	ENST00000387347.2_1040	other_TMapped_ENST00000387347.2	CCAACCTCCGAGCAGTACATGCTAAGACTTCA
1041	ENST00000516183.1_1041	other_TMapped_ENST00000516183.1	TGGCGAGCGAAATGGGACCAGCC
1042	ENST00000459041.1_1042	other_TMapped_ENST00000459041.1	ACTGCTTCACTTGGCTAG
1043	ENST00000516952.1_1043	other_TMapped_ENST00000516952.1	CTTTTCACTACTGCACTTGACTAGT
1044	RP11-49I4.2-005_1044	protein_coding_RP11-49I4.2-005	CGCGGCGGCGGGCGGCGACGCG
1045	ENST00000363120.1_1045	other_TMapped_ENST00000363120.1	CGAGACCCGCGGGCGCTCTCCAGTCCTTTAGA
1046	SP3-208_1046	protein_coding_SP3-208	ACGGCGGCGGGGGCCCCGG
1047	RP11-846F4.3-001_1047	protein_coding_RP11-846F4.3-001	GCTATTAAAGGTTCGTTTGTTAAAAA
1048	hsa-mir-425_1048	miRNA_hsa-mir-425	AATGACGCGATCACTCCCGTTGAGT
1049	hsa-mir-29c_1049	miRNA_hsa-mir-29c	TAGCACCATTTGAAATCGGTTACT
1050	hsa-mir-301a_1050	miRNA_hsa-mir-301a	CAGTGCAATAGTATTGTCAAAGCATA
1051	ENST00000387347.2_1051	other_TMapped_ENST00000387347.2	ATAAGGCCTACTTCACAAAGCGCCTTCCC
1052	RP11-1089B7.2-001_1052	protein_coding_RP11-1089B7.2-001	GCGGGTGTGGTGGAACTGGTAGA
1053	hsa-mir-548j_1053	miRNA_hsa-mir-548j	GCAAAAGTAATTGCGGTCTTTGGT
1054	ENST00000363120.1_1054	other_TMapped_ENST00000363120.1	TCGAGACCCGCGGGCGCTCTCCAGTCCTTATT
1055	RP11-69I17.1-007_1055	protein_coding_RP11-69I17.1-007	GAAAGTGTGGCCTATCAATCC
1056	hsa-mir-4762_1056	miRNA_hsa-mir-4762	CCAAATCTTGATCAGAAGCC
1057	MT-CYB-201_1057	protein_coding_MT-CYB-201	TGAGAATAGTGTTAATGTCATTAAGGAGAGA
1058	ENST00000599363.5_1058	other_TMapped_ENST00000599363.5	AAGGGTTCCTGGGGAAGGT
1059	CTB-60E11.5-008_1059	protein_coding_CTB-60E11.5-008	TGAGGACGAAGAGGAGGAGGAA
1060	ENST00000410533.1_1060	other_TMapped_ENST00000410533.1	ATGGGTTTTTGGAGCAGG
1061	CASP8AP2-205_1061	protein_coding_CASP8AP2-205	TCTTGTTCTCTTTTCCTCAAT
1062	RNY4P16-201_1062	YRNA_RNY4P16-201	TAGTGGGTTATCAGAACTTC
1063	ENST00000516611.1_1063	other_TMapped_ENST00000516611.1	TCTCCACTCCCACTGCTTCCCTTGACTAGC
1064	hsa-mir-598_1064	miRNA_hsa-mir-598	TGCGTCATCGTTGTCATCGTCAT
1065	ENST00000468422.1_1065	other_TMapped_ENST00000468422.1	TCCACGCCACCTCTGCCAGCTGC
1066	hsa-mir-224_1066	miRNA_hsa-mir-224	CAAGTCACTAGTGGTTCCGTTTAG
1067	tRNA-Val-TAC-2-1_1067	tRNA_tRNA-Val-TAC-2-1	GAAGGTCCTGGGTTCGAGCCCCAGTGGAA
1068	RNY4P18-201_1068	YRNA_RNY4P18-201	TCCCCCACTGCTAAATTTGACTGGCTAAAA
1069	ENST00000494125.1_1069	other_TMapped_ENST00000494125.1	CAAGTCCCCCTCCTCCCTGCAG
1070	hsa-mir-130b_1070	miRNA_hsa-mir-130b	CGGTGCAATGATGAAAGGGCATC
1071	ENST00000387421.1_1071	other_TMapped_ENST00000387421.1	CACTGTAAAGCTAACTTAGCATTAACCTTTGA
1072	ENST00000363745.1_1072	other_TMapped_ENST00000363745.1	GCCCCCCACTGCTAAATTTGACCGGCTTTA
1073	RP11-465L10.11-001_1073	protein_coding_RP11-465L10.11-001	TGTAGCCGCGTCCCCTCCAGT
1074	tRNA-Glu-CTC-1-1_1074	tRNA_tRNA-Glu-CTC-1-1	GTGGTTAGGCTTCGGCGCTCTCACCGCCGC
1075	AC037198.2-001_1075	protein_coding_AC037198.2-001	GCATCGCAAAGGGGGGCGTTATT
1076	ENST00000365274.1_1076	other_TMapped_ENST00000365274.1	GGCTGGTCCGAGTGCAGTGGTGTTTGCA
1077	ENST00000623147.1_1077	other_TMapped_ENST00000623147.1	GAAAGCTGAAAAGCACTTTGA
1078	hsa-mir-103b-1_1078	miRNA_hsa-mir-103b-1	GCAGAATTGTACAGGGCTATGA
1079	RNY4P10-201_1079	YRNA_RNY4P10-201	GCTGGTCCGATGGTAGTGGGTTATCAGCGC
1080	hsa-mir-12136_1080	miRNA_hsa-mir-12136	GAAAAAGTCATGGAGGCCATGAGGT
1081	RP11-645N11.2-002_1081	protein_coding_RP11-645N11.2-002	TCCCGGGTTTCGGCACCAAAAGA
1082	ENST00000387460.2_1082	other_TMapped_ENST00000387460.2	GGAGATGAAAACCTTTTTCGAAGGACACCA
1083	AC003005.3-005_1083	protein_coding_AC003005.3-005	GTCCCTGTTCGGGCGCCAAGAA
1084	hsa-let-7e_1084	miRNA_hsa-let-7e	TGAGGTAGGAGGTTGTATTTT
1085	hsa-mir-139_1085	miRNA_hsa-mir-139	TCTACAGTGCACGTGTCTCCAGGA
1086	RP11-510J16.2-002_1086	protein_coding_RP11-510J16.2-002	TGGCCCCTCTGCCCCCACCCAGA
1087	hsa-mir-145_1087	miRNA_hsa-mir-145	GTCCAGTTTTCCCAGGAATCGCT
1088	RP11-579D7.3-002_1088	protein_coding_RP11-579D7.3-002	ATGGGGTAGGGGTGAGGGTAT
1089	ENST00000450552.1_1089	other_TMapped_ENST00000450552.1	CCTGAGAGGGATGAAGCTGAGG
1090	hsa-mir-30d_1090	miRNA_hsa-mir-30d	AACATCCCCGACTGGACGC
1091	ENST00000387314.1_1091	other_TMapped_ENST00000387314.1	AAAATGTTTAGACGGGCTCACATCAC
1092	ENST00000445125.2_1092	other_TMapped_ENST00000445125.2	GAGTGATTTGTCTGGTTGATTCC
1093	ENST00000636511.1_1093	other_TMapped_ENST00000636511.1	TTCTATTTTCTTCTTAACAGT
1094	hsa-mir-342_1094	miRNA_hsa-mir-342	GGGGTGCTATCTGTGATTGC
1095	ENST00000364950.1_1095	other_TMapped_ENST00000364950.1	ACCCCCACTGCTAAATTTGACTGGCTG
1096	hsa-mir-342_1096	miRNA_hsa-mir-342	TTCTCCCACAGAAATCGCACCCGTC
1097	ENST00000387392.1_1097	other_TMapped_ENST00000387392.1	TTCAGTTGATGCAGAGTGGGGTTA
1098	RNY4P27-201_1098	YRNA_RNY4P27-201	GTCCGAAGGTAGTGGGTTATCA
1099	ENST00000387392.1_1099	other_TMapped_ENST00000387392.1	AGTTGATGCAGAGTGGGGTTTA
1100	hsa-mir-223_1100	miRNA_hsa-mir-223	CGTGTATTTGACAAGCCGAGTTG
1101	tRNA-Glu-TTC-2-2_1101	tRNA_tRNA-Glu-TTC-2-2	CACATGGTCTAGCGGTTAGGA
1102	ENST00000387449.1_1102	other_TMapped_ENST00000387449.1	TCATGCCCCCATGTCTAACAACATGGCTTAAAA
1103	CTD-2244F11.1-001_1103	protein_coding_CTD-2244F11.1-001	AGAAGGAAAGAGAGGAGAC
1104	hsa-mir-425_1104	miRNA_hsa-mir-425	CCATGACACGATCACTCCCGTTGA
1105	tRNA-Glu-TTC-14-1_1105	tRNA_tRNA-Glu-TTC-14-1	CCTGGTGGTCTAGTGGCTAGGATTCGGCGCTTT
1106	RP5-1099E6.1-001_1106	protein_coding_RP5-1099E6.1-001	CTTTCTGACTTTTTTCCCCAGA
1107	tRNA-Arg-ACG-2-4_1107	tRNA_tRNA-Arg-ACG-2-4	AGATTCTAGGTTCGACTCCTGGCTGGCTCGCCA
1108	ENST00000595897.5_1108	other_TMapped_ENST00000595897.5	CTCCCTGTCTCTGTCCCTCTCCCTG
1109	RNY4-201_1109	YRNA_RNY4-201	GCCCCCACTGCTAAATTTGACTGGCTATTTTTT
1110	hsa_piR_020365|gb|DQ597975|Homo_sapiens_1110	piRNA_hsa_piR_020365|gb|DQ597975|Homo_sapiens	GTGATCGTATAGTGGTTAGTCCT
1111	hsa-mir-146a_1111	miRNA_hsa-mir-146a	TGAGAACTGAATTCCATGAGTTGT
1112	tRNA-Leu-AAG-1-1_1112	tRNA_tRNA-Leu-AAG-1-1	TGTCTCTTCGGAGGCGTGGGTTCG
1113	hsa-mir-425_1113	miRNA_hsa-mir-425	ACTAACACGATCACTCCCGTTGAGT
1114	hsa-mir-451b_1114	miRNA_hsa-mir-451b	AAACCGTTACCATTACTGAGTTTCG
1115	RNY4P10-201_1115	YRNA_RNY4P10-201	GCTGGTCCGATGGGAGTGGGTTATCAGAA
1116	hsa-mir-126_1116	miRNA_hsa-mir-126	CGTACAGTGAGTAATAATGCG
1117	tRNA-Glu-TTC-2-2_1117	tRNA_tRNA-Glu-TTC-2-2	GTTTTCACCCAGGCGGCCCG
1118	RP3-481F12.6-001_1118	protein_coding_RP3-481F12.6-001	CAAGAACAGGGTTTGTTAGG
1119	hsa-mir-26a-2_1119	miRNA_hsa-mir-26a-2	TNCAAGTAATCCAGGATAGGCT
1120	ENST00000387372.1_1120	other_TMapped_ENST00000387372.1	GATGGGTGTGATAGGTGGCACGGAGAATTTT
1121	tRNA-Leu-AAG-1-1_1121	tRNA_tRNA-Leu-AAG-1-1	GGTCGCGTGGCCGAGCGGTCTAA
1122	ENST00000608279.1_1122	other_TMapped_ENST00000608279.1	ATACAAAGTATTATTCTGCCCA
1123	RP11-762B21.4-027_1123	protein_coding_RP11-762B21.4-027	ACCTTCCTTGGATGTCTGAGGTG
1124	RNY4P25-201_1124	YRNA_RNY4P25-201	GGCCCGGTGGTAGTGGGTTATCA
1125	hsa-mir-1277_1125	miRNA_hsa-mir-1277	TATATATATATGTACGTAA
1126	hsa-mir-24-1_1126	miRNA_hsa-mir-24-1	GGTGGCTCAGTTCAGCAGGAACAG
1127	hsa-mir-28_1127	miRNA_hsa-mir-28	AAGGANCTCACAGTCTATTGA
1128	RNY4P10-201_1128	YRNA_RNY4P10-201	GGCTGGTCCGATGGTAGTGCGTTATCAGAACAAA
1129	RNY4P14-201_1129	YRNA_RNY4P14-201	GGCTGGTCTGATGGTAGTGGGGTATCAGAAC
1130	hsa-mir-338_1130	miRNA_hsa-mir-338	AGCATCAGTGATTTTGTTGA
1131	AC037198.2-002_1131	protein_coding_AC037198.2-002	AGACCTGGTGGATGCTGTGCGGGT
1132	RP11-68C8.3-001_1132	protein_coding_RP11-68C8.3-001	AATCTTACCCCGCCTGTTTACCAAAAACATCACC
1133	hsa-mir-584_1133	miRNA_hsa-mir-584	TTATGGTTTGCCTGGAACTGA
1134	CTB-180A7.1-006_1134	protein_coding_CTB-180A7.1-006	CCTGAGGAGGACAAGGAGGAGGAGGAGGAGAAG
1135	RP4-790G17.3-001_1135	protein_coding_RP4-790G17.3-001	TGGAGGGTGCTGTGGTGAGCT
1136	hsa_piR_018570|gb|DQ595536|Homo_sapiens_1136	piRNA_hsa_piR_018570|gb|DQ595536|Homo_sapiens	TGGTAGAATTCTCGCCTGCCC
1137	hsa-mir-148b_1137	miRNA_hsa-mir-148b	AAGTCCTGTTATACACTCAGGCT
1138	hsa-mir-223_1138	miRNA_hsa-mir-223	TGTCAGTTTGTCAAATAACCCATG
1139	tRNA-Gly-GCC-2-6_1139	tRNA_tRNA-Gly-GCC-2-6	CGCGGGAGGCNCGGGTTCGATTCCCGGNCAA
1140	RP11-437J2.2-001_1140	protein_coding_RP11-437J2.2-001	TGACTGAGGAGGACGAAATG
1141	hsa-mir-4742_1141	miRNA_hsa-mir-4742	TCAGGCAAAGGGATATTTACAGA
1142	hsa-mir-125a_1142	miRNA_hsa-mir-125a	TCCCTGAGACCCTTTAACCTGTGAAC
1143	AC022558.2-001_1143	protein_coding_AC022558.2-001	ATTTAGCCAAGATGTACTAATT
1144	AC018682.5-001_1144	protein_coding_AC018682.5-001	TCCTAGGAGGTACTGCCTG
1145	hsa-mir-1249_1145	miRNA_hsa-mir-1249	AACGACCTTCCCCCCCTTCT
1146	ENST00000362330.2_1146	other_TMapped_ENST00000362330.2	CCCCCCACTGCTAAAATTTGACTGGCTCTT
1147	hsa-mir-28_1147	miRNA_hsa-mir-28	AAGGAGCTCACAGTCTATTGTGA
1148	hsa-mir-93_1148	miRNA_hsa-mir-93	CCAAAGTGCTGTTCGTGCCGGT
1149	hsa-mir-134_1149	miRNA_hsa-mir-134	TGTGACTGGTTGACCAGAGGGGC
1150	ENST00000387372.1_1150	other_TMapped_ENST00000387372.1	GGACTATGAGAATCGAACCCACCCC
1151	RP1-298J15.1-006_1151	protein_coding_RP1-298J15.1-006	TCCTGCCTGCGGGAGTAGGAGA
1152	MT-CO2-201_1152	protein_coding_MT-CO2-201	GTAGCGTCTTGTAGACCTACTTGCGCTGCACCC
1153	ENST00000387459.1_1153	other_TMapped_ENST00000387459.1	CATTGGTCGTGGTTGCAGTCCGTGCGAG
1154	RP5-902P15.1-005_1154	protein_coding_RP5-902P15.1-005	TCTCCGCTCTGTCTCAGCCACGA
1155	ENST00000623780.1_1155	other_TMapped_ENST00000623780.1	TATTCCAGTTGTTGCAGTTAAAA
1156	CDC42SE2-202_1156	protein_coding_CDC42SE2-202	CTGGGCGGGGAGGGGGAGCCAG
1157	RP6-201G10.1-001_1157	protein_coding_RP6-201G10.1-001	AACCGCAAGGAGGGGGATGC
1158	hsa-mir-484_1158	miRNA_hsa-mir-484	TCAGGCTCAGTCCCCTCCGATT
1159	RNY4P27-201_1159	YRNA_RNY4P27-201	GACTGGTCCGATGGTAGTAGGTTATCAGAA
1160	hsa-mir-154_1160	miRNA_hsa-mir-154	CTAGGTTATCCGTGTTGCCTTCG
1161	B2M-202_1161	protein_coding_B2M-202	ATGTCTCGCTCCGTGGCC
1162	RNY4P25-201_1162	YRNA_RNY4P25-201	ACATTAGTGTCACTAAAGTTGGTATA
1163	hsa-mir-382_1163	miRNA_hsa-mir-382	AAGTTGTTCGTGGTGGATTCGAT
1164	RP3-494G10.2-001_1164	protein_coding_RP3-494G10.2-001	GATTTTTAAGAATAAAGTACTA
1165	ENST00000387347.2_1165	other_TMapped_ENST00000387347.2	CGCATAAGCCTGCGTCAGATCAAAACACT
1166	RP11-420F12.1-003_1166	protein_coding_RP11-420F12.1-003	CATGTGAACAGCAATTGG
1167	ENST00000387459.1_1167	other_TMapped_ENST00000387459.1	TTGGTCGTGGTTGTAGTCCGTGCGAGAATACCC
1168	CTD-2152M20.1-001_1168	protein_coding_CTD-2152M20.1-001	CTTACACTTAGGAGATTTA
1169	ENST00000628780.1_1169	other_TMapped_ENST00000628780.1	CCCTGAGGTCAGAGCTGCCATCG
1170	RP13-577J18.1-002_1170	protein_coding_RP13-577J18.1-002	TGGCGGCCGGCGGCGGCGGAGT
1171	RNY4P27-201_1171	YRNA_RNY4P27-201	GCTGGTCCGATGGTAGAGGGTTATCAGAACTTA
1172	ENST00000387441.1_1172	other_TMapped_ENST00000387441.1	TGAATCTGACAACAGAGGCTTACGCCCCCTTATA
1173	ENST00000445125.2_1173	other_TMapped_ENST00000445125.2	CTTAGTTGGTGGAGTGATTTGCCTGCT
1174	ENST00000387347.2_1174	other_TMapped_ENST00000387347.2	AACAAGTCATTATTACCCTCACTGTCAACCCAAC
1175	hsa-mir-339_1175	miRNA_hsa-mir-339	TCCCTGTCCTCCAGGAGCTCATGTT
1176	ENST00000363179.1_1176	other_TMapped_ENST00000363179.1	CTCCCCCTGCTTCACTTGAC
1177	hsa-mir-125a_1177	miRNA_hsa-mir-125a	TCCCTGAGACCCTTTAACCTGTGTAT
1178	CTD-2528L19.1-002_1178	protein_coding_CTD-2528L19.1-002	CAATGTGGAATGGCTTTGAGA
1179	ENST00000459041.1_1179	other_TMapped_ENST00000459041.1	TCCCACTGCTTCACTTGGCTAGCCTT
1180	ENST00000389680.2_1180	other_TMapped_ENST00000389680.2	CCAGACAACTACGATAGCCCTTATGAAA
1181	RNY1-201_1181	YRNA_RNY1-201	TCCGAAGGTAGTGAGTTAT
1182	hsa-let-7f-2_1182	miRNA_hsa-let-7f-2	TGAGGTAGTAGATTGGATAGTTA
1183	AC002094.2-001_1183	protein_coding_AC002094.2-001	TGGCGCAGGTCCTGGGAAG
1184	hsa-mir-1307_1184	miRNA_hsa-mir-1307	TCGACCGGACCTCAACCGGCTCGT
1185	RP11-809L8.1-002_1185	protein_coding_RP11-809L8.1-002	TGATAGCAATAGAGAGGGGCTTT
1186	ENST00000459584.1_1186	other_TMapped_ENST00000459584.1	TGAACAAAGGAACCCCTGAAG
1187	hsa-mir-186_1187	miRNA_hsa-mir-186	CAAAGAATTCTCCTTTTGGGCCTTTT
1188	hsa-mir-6741_1188	miRNA_hsa-mir-6741	GGTGGGTGCTGGTGGGAGCC
1189	hsa_piR_016945|gb|DQ593356|Homo_sapiens_1189	piRNA_hsa_piR_016945|gb|DQ593356|Homo_sapiens	ACGTCGCTCAGTCGGTAGAGC
1190	hsa-mir-181a-2_1190	miRNA_hsa-mir-181a-2	AACATTCCACGCTGTCGGTGA
1191	ENST00000479868.6_1191	other_TMapped_ENST00000479868.6	TAGTTGTTGGAAGTTTGAGG
1192	RP11-727F15.8-001_1192	protein_coding_RP11-727F15.8-001	TTTGGCTTAGATCAAGTGTAGTATCTGTTCTT
1193	hsa-mir-10527_1193	miRNA_hsa-mir-10527	AGCAAATGTTGGGTGAACGGCT
1194	RNY4-201_1194	YRNA_RNY4-201	TACCCCCACTGCTAAATTTGACTGGCT
1195	MT-ATP6-201_1195	protein_coding_MT-ATP6-201	ACTAACCTCCTCGGACTCCTGCCTCACT
1196	AC079328.1-018_1196	protein_coding_AC079328.1-018	GATGTCCTGAGCTGCACGTGT
1197	ENST00000548526.1_1197	other_TMapped_ENST00000548526.1	CGGGGGAAAGCAGGGGATCT
1198	hsa-mir-140_1198	miRNA_hsa-mir-140	TACCACCGGGTAGAACCACGG
1199	hsa-mir-486-2_1199	miRNA_hsa-mir-486-2	TCCTGTACTGAGCTGCCCCGTGC
1200	RP11-735A19.1-002_1200	protein_coding_RP11-735A19.1-002	GGCCAGTTAGCTCAGTTGG
1201	hsa-mir-6511a-4_1201	miRNA_hsa-mir-6511a-4	CTGCAGGCAGAAGTGGGGCTGA
1202	ENST00000364545.1_1202	other_TMapped_ENST00000364545.1	AATACCGGGTGCTGTTGACGT
1203	hsa-mir-1246_1203	miRNA_hsa-mir-1246	AAATNGATTTTTGGAGCAGG
1204	hsa-mir-150_1204	miRNA_hsa-mir-150	TCTCCCAACCCTTGTACGAGT
1205	RNY4-201_1205	YRNA_RNY4-201	CCCCCCACTGCTAAATTTGACTGGATTTTG
1206	ENST00000387347.2_1206	other_TMapped_ENST00000387347.2	TACATGCTAAGACTTCACCAGTCAAAGCGAAAA
1207	ENST00000516611.1_1207	other_TMapped_ENST00000516611.1	TCCCCCTGCTTCCCTTGACTAGCCT
1208	RNY4-201_1208	YRNA_RNY4-201	CCCGCCCCCCACTGCTAAATTTGACTGG
1209	hsa-mir-27a_1209	miRNA_hsa-mir-27a	TTCACAGTGGCTAAGTTCCGAATT
1210	hsa-mir-12136_1210	miRNA_hsa-mir-12136	GAAAAAGTCATGGAGGCCATGGGC
1211	hsa-let-7d_1211	miRNA_hsa-let-7d	AGAGTTAGTAGGTTGCATAGTTT
1212	hsa-mir-320a_1212	miRNA_hsa-mir-320a	AAAGCTGGGTTGAGAGGGCT
1213	RP11-271K21.3-001_1213	protein_coding_RP11-271K21.3-001	TGTTCTCGGCCGTCCCACCCTTT
1214	RP11-427I6.1-005_1214	protein_coding_RP11-427I6.1-005	GTAACAAGGTTGCTGTAGGG
1215	RP11-215L17.2-001_1215	protein_coding_RP11-215L17.2-001	AACTGTTAGTCCAAAGAGGA
1216	hsa-mir-25_1216	miRNA_hsa-mir-25	CNTTGCACTTGTCTCGGTC
1217	tRNA-Gly-CCC-1-2_1217	tRNA_tRNA-Gly-CCC-1-2	ACCCGGGTTCAATTCCCGGCG
1218	ENST00000387456.1_1218	other_TMapped_ENST00000387456.1	ACTTTTAAAGGATAACAGCTATCCATTGGTCTAC
1219	RNY1-201_1219	YRNA_RNY1-201	GGCTGGTCCGAAGGTAGGGAGTTATCTCAA
1220	ENST00000387441.1_1220	other_TMapped_ENST00000387441.1	TGAATCTGACAACCGAGGCTTACGACCCCTACCA
1221	ENST00000570208.2_1221	other_TMapped_ENST00000570208.2	CACTCCCTCCGGAACCTCCA
1222	tRNA-Glu-TTC-14-1_1222	tRNA_tRNA-Glu-TTC-14-1	TCCCTGGTGGACTAGTGGCTAGGATTCGGCGCT
1223	tRNA-Ser-CGA-4-1_1223	tRNA_tRNA-Ser-CGA-4-1	GACACGTTGGCCGAGTGGTTAAGG
1224	ENST00000520314.2_1224	other_TMapped_ENST00000520314.2	AATAACCAGCGGGGAAAGAAG
1225	hsa-mir-3613_1225	miRNA_hsa-mir-3613	AAAAAAAAAAAGCCCAACCCT
1226	tRNA-Asn-GTT-1-1_1226	tRNA_tRNA-Asn-GTT-1-1	TTCGGCTGTTAACCGAAAGGTTGGTGGTT
1227	RP11-68C8.3-001_1227	protein_coding_RP11-68C8.3-001	ATATAGTACCGCAAGGGAAAGATGAAACAT
1228	ENST00000383950.2_1228	other_TMapped_ENST00000383950.2	TCTCCACTCCCACTGCTTCACTTGACTAGCTA
1229	MT-ND5-201_1229	protein_coding_MT-ND5-201	TGTTGTGGGTCTCATGAGTTGGAGTGTAGGATA
1230	RNY4P7-201_1230	YRNA_RNY4P7-201	CGGCTGGTCCGATGGTAGTGGGTTATCAGAGCA
1231	hsa-mir-151a_1231	miRNA_hsa-mir-151a	TCGAGGAGCTCACAGTCTATTAA
1232	RP11-193H5.6-001_1232	protein_coding_RP11-193H5.6-001	CCAAGAACAGGGTTTGTTAAGA
1233	RP11-379F12.6-005_1233	protein_coding_RP11-379F12.6-005	GAGAGAGGGAGAGAGAGAGAGAAGAAGAGAGAGA
1234	tRNA-Asp-GTC-2-9_1234	tRNA_tRNA-Asp-GTC-2-9	TCCTCGTTAGTATAGTGGTGAGTATCC
1235	hsa-mir-96_1235	miRNA_hsa-mir-96	TTTGGCACTAGCACATTTTTGA
1236	hsa-mir-320c-2_1236	miRNA_hsa-mir-320c-2	AAAAGCTGGGTTGAGAGGGCAAGAT
1237	tRNA-Phe-GAA-3-1_1237	tRNA_tRNA-Phe-GAA-3-1	GGGATAGCTCAGTTGGGAGAG
1238	RNY4P27-201_1238	YRNA_RNY4P27-201	GCTAAATTTGACTGGCTTAATT
1239	hsa-mir-140_1239	miRNA_hsa-mir-140	ACCACAGGGTAGAACCAAGGAAA
1240	XXbac-BPG249D20.1-002_1240	protein_coding_XXbac-BPG249D20.1-002	GGGACGGGGTCGTGGGACCG
1241	hsa-mir-1307_1241	miRNA_hsa-mir-1307	ACTCGGCGTGGCGTCGGTTGTGA
1242	tRNA-Arg-CCG-2-1_1242	tRNA_tRNA-Arg-CCG-2-1	CTGGGGATTGTGGGTTCGAGTCCCATCTGGGTCG
1243	tRNA-Cys-GCA-1-1_1243	tRNA_tRNA-Cys-GCA-1-1	GCGGGCATAGCTCAGTGGTAGAGC
1244	hsa-mir-339_1244	miRNA_hsa-mir-339	TGAGCGCCTCGACGACAGAGCCAA
1245	ENST00000363745.1_1245	other_TMapped_ENST00000363745.1	GCCCCCCACTGCTAAATTTAACTGGCTT
1246	hsa-mir-1296_1246	miRNA_hsa-mir-1296	TTAGGGCCCTGGCTCCATCTCGA
1247	hsa-mir-320c-1_1247	miRNA_hsa-mir-320c-1	AAAGGCTGGGTTGAGAGGGTA
1248	tRNA-Asp-GTC-1-1_1248	tRNA_tRNA-Asp-GTC-1-1	TATAGTGGTTAGTATCCCCG
1249	hsa_piR_020485|gb|DQ598159|Homo_sapiens_1249	piRNA_hsa_piR_020485|gb|DQ598159|Homo_sapiens	GGGGATGTAGCTCACTGGTAGAGC
1250	hsa-let-7d_1250	miRNA_hsa-let-7d	CTACACGACCTGCTGCCTTTCT
1251	RP11-510J16.1-001_1251	protein_coding_RP11-510J16.1-001	AAGCTGGATGTGGTGGCAACGT
1252	hsa-mir-27a_1252	miRNA_hsa-mir-27a	TCACAGTGGCTAAGTTCCGTTAA
1253	CTC-435M10.9-001_1253	protein_coding_CTC-435M10.9-001	TTATCTTTTGATGTCACCGGAGTTGTGC
1254	hsa-mir-4999_1254	miRNA_hsa-mir-4999	TGCTGTATTGTCAGGTAGTGATA
1255	RP11-49I4.2-005_1255	protein_coding_RP11-49I4.2-005	GGACGCGGCGGCGGGCGGCGACGCG
1256	hsa-mir-548t_1256	miRNA_hsa-mir-548t	CAAAAGTGATCGTGGTTTTT
1257	ENST00000531347.1_1257	other_TMapped_ENST00000531347.1	CTTAACGAACCGCATGGCCTTG
1258	RP11-477J21.1-015_1258	protein_coding_RP11-477J21.1-015	TCAAAACAGCCTCTGACTTTT
1259	hsa-mir-142_1259	miRNA_hsa-mir-142	TGTAGTGTTTCCTACTTTGTGGA
1260	hsa-mir-494_1260	miRNA_hsa-mir-494	TGAAACATACACGGGAAACCTCT
1261	ENST00000635274.1_1261	other_TMapped_ENST00000635274.1	TACTCGGGAGGCTGAGGCTGGAGGATCGCTT
1262	hsa-mir-337_1262	miRNA_hsa-mir-337	CTCCTATATGATGCCTTTGTTC
1263	tRNA-Lys-TTT-5-1_1263	tRNA_tRNA-Lys-TTT-5-1	ATAGCTCAGTCGGTAGAGCGACG
1264	AC103741.1-001_1264	protein_coding_AC103741.1-001	AATCCGGGCTGAGCTTGCGCAG
1265	hsa-mir-143_1265	miRNA_hsa-mir-143	TGAGAAGAAGCACTGTAGCTCA
1266	AC004623.1-014_1266	protein_coding_AC004623.1-014	GTCTGAAGATGGGGGGCCCAT
1267	ENST00000387460.2_1267	other_TMapped_ENST00000387460.2	GTCCTTGGAAAAAGGTTTCCATCTCCGG
1268	MT-ATP6-201_1268	protein_coding_MT-ATP6-201	AGGCTTACTAGAAGTGTGAAAACGTAGG
1269	hsa-mir-126_1269	miRNA_hsa-mir-126	GTCCCGTGAGTAATAATGCG
1270	RNY4P20-201_1270	YRNA_RNY4P20-201	GGCTGGTCCGATGGAAGTGGGTTATCAGAAAT
1271	hsa_piR_020388|gb|DQ598008|Homo_sapiens_1271	piRNA_hsa_piR_020388|gb|DQ598008|Homo_sapiens	GGCTCGTTGGCCTAGGGGTATGA
1272	hsa-let-7e_1272	miRNA_hsa-let-7e	TGAGGTAGGAGGTTGTATAGTATTT
1273	hsa-mir-223_1273	miRNA_hsa-mir-223	CGTGTATTTGACAAGCTGGGT
1274	RNY4-201_1274	YRNA_RNY4-201	CCCCCCCACTGCTAGATTTGACTGGCTA
1275	AC006273.9-011_1275	protein_coding_AC006273.9-011	GACCCCGGCCCGAGGCACCA
1276	hsa-mir-12136_1276	miRNA_hsa-mir-12136	GGTTCGATTCCTTCCTTTTTTGACA
1277	hsa-mir-3184_1277	miRNA_hsa-mir-3184	GCTCGGTCTGAGGCCCCTCATT
1278	hsa-mir-486-2_1278	miRNA_hsa-mir-486-2	TCCTGTACTGAGCTGCCCCTAT
1279	hsa-mir-18a_1279	miRNA_hsa-mir-18a	CACTGCCCTAAGTGCTCCTTCT
1280	RP11-162E24.1-005_1280	protein_coding_RP11-162E24.1-005	AAGTGGTGTTTCCAGTGGCTGACG
1281	RNY4P10-201_1281	YRNA_RNY4P10-201	GGCTGGTCCGATGGTAGTGGGTTATCAGGGGT
1282	AC007381.4-001_1282	protein_coding_AC007381.4-001	AGGACTGGGAGGGACACACCCC
1283	AC018731.1-001_1283	protein_coding_AC018731.1-001	TGATGATATTCTCTGCAACTTTTT
1284	ENST00000387347.2_1284	other_TMapped_ENST00000387347.2	CGCATAAGCCTGCGTCAGATCAAAACAC
1285	UPF2-203_1285	protein_coding_UPF2-203	AGAAGAGGAGGAAGAGAA
1286	hsa-mir-320a_1286	miRNA_hsa-mir-320a	AAAAGCTGGGTTGAGAGGGCCAAGA
1287	hsa-mir-143_1287	miRNA_hsa-mir-143	CTGAGATGAAGCACTGTGGCTCT
1288	hsa-mir-146a_1288	miRNA_hsa-mir-146a	GAGAACTGAATTCCAAGGGTT
1289	ENST00000387449.1_1289	other_TMapped_ENST00000387449.1	AGCTCACAAGAACTGCTACCTCATGCCC
1290	RP11-18A3.3-001_1290	protein_coding_RP11-18A3.3-001	ATGAATTCTATTTTTGACTGATG
1291	RP11-694I15.3-001_1291	protein_coding_RP11-694I15.3-001	TAGAGCTGGTACGGACAGGGG
1292	hsa_piR_020499|gb|DQ598183|Homo_sapiens_1292	piRNA_hsa_piR_020499|gb|DQ598183|Homo_sapiens	GAGTAGCTCAGTGGTAGAGCATTT
1293	ENST00000387449.1_1293	other_TMapped_ENST00000387449.1	TAACTCGTGCCCCCATGTCTAACAACATGGCTA
1294	hsa-mir-193b_1294	miRNA_hsa-mir-193b	CGGGGTTTTGAGGGCGCGA
1295	PTCH2-203_1295	protein_coding_PTCH2-203	ATAAATCTTTCGCCTTTTACTA
1296	ENST00000365439.1_1296	other_TMapped_ENST00000365439.1	CTCCCACTGCTTCACCTGACTAGTT
1297	RNY4P6-201_1297	YRNA_RNY4P6-201	GGCTGGTCCTATGGTAGTGGGTTACCAGAAC
1298	RP11-583M2.1-001_1298	protein_coding_RP11-583M2.1-001	ACGCCACCGGGTCGGAGGACTACGAG
1299	RNY4P7-201_1299	YRNA_RNY4P7-201	GGCTGGTCCGCTGGTAGTGGGTTATCAN
1300	hsa-mir-92b_1300	miRNA_hsa-mir-92b	TATTGCACTCGTCCCGGCCTCTAG
1301	RP11-169K16.1-001_1301	protein_coding_RP11-169K16.1-001	AACCACCTGACCCCTTCCC
1302	MT-CO2-201_1302	protein_coding_MT-CO2-201	TAGTCCTCATCGCCCTCCCATCCCTACGA
1303	ENST00000387441.1_1303	other_TMapped_ENST00000387441.1	GAATCTGACAACAGAGGCTTACGACCCCTAA
1304	tRNA-Val-CAC-6-1_1304	tRNA_tRNA-Val-CAC-6-1	GTTGGTTATCACATTCGCCTCACACGCG
1305	hsa-mir-760_1305	miRNA_hsa-mir-760	TCGGATCTGGGTCTGTGGGGAG
1306	hsa-mir-4433a_1306	miRNA_hsa-mir-4433a	TGTCCCACCCCCACTCCTGTTTTC
1307	MT-ND1-201_1307	protein_coding_MT-ND1-201	TACTCAATCCTCTGATCAGGGTGAGCACCCA
1308	RNY4P7-201_1308	YRNA_RNY4P7-201	TGGCTGGTCCGATGGTAGTGGGGTATCAGAACTA
1309	ENST00000387377.1_1309	other_TMapped_ENST00000387377.1	AGTAAGGTCGGCTAAATAAGCTATCGGGCCCAT
1310	ENST00000363334.1_1310	other_TMapped_ENST00000363334.1	CCGGATGTGCTGACCCCTG
1311	hsa-mir-190a_1311	miRNA_hsa-mir-190a	TGATATGTTTGATATATTAGGTTGA
1312	hsa-mir-382_1312	miRNA_hsa-mir-382	GAAGTCGTTCGTGGTGGATTCG
1313	ENST00000482818.1_1313	other_TMapped_ENST00000482818.1	GGGCTGACAGCAGGTGTGTGG
1314	MT-CO3-201_1314	protein_coding_MT-CO3-201	ATTAGGAGGGCTGAGAGGGCCCCTA
1315	RNY4-201_1315	YRNA_RNY4-201	CCCCCACTGCTAAATTTGACTTTT
1316	ENST00000387347.2_1316	other_TMapped_ENST00000387347.2	CCGATGGTGCAGCCGCTATTAAAGGTTCGTTTGTT
1317	ENST00000459041.1_1317	other_TMapped_ENST00000459041.1	CTCCCCCTGCTTCACTTGGCTAGCCTT
1318	ENST00000515983.1_1318	other_TMapped_ENST00000515983.1	CTTCTCCACTCCTACTGCTTCACTTGACTAGCCTA
1319	ENST00000444889.1_1319	other_TMapped_ENST00000444889.1	AGCTCTCCAAACTCGGTCATC
1320	hsa-mir-181a-2_1320	miRNA_hsa-mir-181a-2	ACATTCAACGCTGTCGGTCA
1321	hsa-mir-151a_1321	miRNA_hsa-mir-151a	CTCGAGGAGCTCACAGGCTAGT
1322	hsa-mir-12136_1322	miRNA_hsa-mir-12136	GAAAAAGTCATGGAGGCAATG
1323	hsa-mir-433_1323	miRNA_hsa-mir-433	ATCATGATGGGCTCCTCAGTGTT
1324	ENST00000495165.5_1324	other_TMapped_ENST00000495165.5	GCTTGAGAGGATCTGTCCCTA
1325	ENST00000504091.1_1325	other_TMapped_ENST00000504091.1	TTTTTTTAGGATTGAAAATG
1326	hsa-mir-25_1326	miRNA_hsa-mir-25	CATTGCACTTGTCTCAGTCTG
1327	RP11-724F15.1-001_1327	protein_coding_RP11-724F15.1-001	ACTTGGGGAATGTGTTGGGATGGA
1328	RNY3-201_1328	YRNA_RNY3-201	GGCTGGTCCGAGTGCAGTGGCGTTTACAACT
1329	RP11-677M14.1-002_1329	protein_coding_RP11-677M14.1-002	GACACCAGCATGGACTGCTTT
1330	RNY4P10-201_1330	YRNA_RNY4P10-201	GGCTGGTCCGATGGTAGTGGGTTATCAGGTCTT
1331	XX-FW83563B9.2-001_1331	protein_coding_XX-FW83563B9.2-001	TGAGCAGCCACACTGGGACT
1332	RNY4P10-201_1332	YRNA_RNY4P10-201	GGTCCGATGGTAGTGGGTTATCTA
1333	CTD-2547L24.2-001_1333	protein_coding_CTD-2547L24.2-001	TTTGCAGACTGAAGTGGGGA
1334	hsa-mir-191_1334	miRNA_hsa-mir-191	TCACCGGAATCCCAAAAGCAGCT
1335	hsa-mir-1229_1335	miRNA_hsa-mir-1229	CTCACCACTGCCCTCCCACAGA
1336	hsa-mir-4732_1336	miRNA_hsa-mir-4732	TAGAGCAGGGAGCAGGAAG
1337	AC120057.4-007_1337	protein_coding_AC120057.4-007	AGAGCCCCGTCCGGCCCGGACCCTGTC
1338	hsa-let-7f-2_1338	miRNA_hsa-let-7f-2	ATAAGGTAGTAGATTGTATAGTT
1339	ENST00000387372.1_1339	other_TMapped_ENST00000387372.1	TCTCAGGGATGGGTTCGATTCTCATAGTCCTAG
1340	ENST00000445125.2_1340	other_TMapped_ENST00000445125.2	GAGTGATTTGTCTGGTTACTTCCGTTA
1341	hsa-mir-328_1341	miRNA_hsa-mir-328	CTGGCCCTCTCTGCCCTTACGAT
1342	ENST00000475426.1_1342	other_TMapped_ENST00000475426.1	CTCTGAGGGCAAAAGCTACG
1343	hsa_piR_020364|gb|DQ597971|Homo_sapiens_1343	piRNA_hsa_piR_020364|gb|DQ597971|Homo_sapiens	GGTATAGCTCAGTTGGTTAGAG
1344	hsa-mir-21_1344	miRNA_hsa-mir-21	AACACCAGTCGATGGGCTGTCAT
1345	hsa-mir-93_1345	miRNA_hsa-mir-93	ACTGCTGAGCTAGCACTTCTCGT
1346	RP3-438D16.3-001_1346	protein_coding_RP3-438D16.3-001	AATTCTGGTTGTATTGGGC
1347	ENST00000389680.2_1347	other_TMapped_ENST00000389680.2	AAAGCTAAAACTCACCTGAGTTGTAAACAACTC
1348	ENST00000616691.1_1348	other_TMapped_ENST00000616691.1	GAAGGGGAGGGAAAGGGGGAAA
1349	RP13-554M15.1-001_1349	protein_coding_RP13-554M15.1-001	ATGGCGGGGGCCCCGGGCAG
1350	MT-CO2-201_1350	protein_coding_MT-CO2-201	TGGGCATGAAACTGTGGTTTGCTCCACAGA
1351	hsa-mir-130a_1351	miRNA_hsa-mir-130a	GCAGTGCAATGTTAAACGGGCAT
1352	RP11-257K9.5-008_1352	protein_coding_RP11-257K9.5-008	AGGAGGGCGGCGCCGCCG
1353	AC084219.1-001_1353	protein_coding_AC084219.1-001	AGGGGCTGAGGCAGAAGG
1354	AP005264.3-001_1354	protein_coding_AP005264.3-001	CCGCCCCCGCCCCGCCGCTTAT
1355	hsa-mir-30c-2_1355	miRNA_hsa-mir-30c-2	TGTAAACATCCTACACTCTCACCT
1356	RP1-160A22.4-001_1356	protein_coding_RP1-160A22.4-001	GTTTCGGTGGTTGAGCGTCCCTT
1357	RP11-723C11.3-013_1357	protein_coding_RP11-723C11.3-013	TTCACGTCCCTCCGTCCCCACC
1358	ENST00000387441.1_1358	other_TMapped_ENST00000387441.1	AATCTGACAACAGAGGCTTACGACCCCTTATTT
1359	RNY4-201_1359	YRNA_RNY4-201	CCCNCCACTGCTAAATTTGACTGGCTTT
1360	RNY4-201_1360	YRNA_RNY4-201	GCCCCCACTGCTAAATTTGACTGGCTTATTTT
1361	ENST00000363624.1_1361	other_TMapped_ENST00000363624.1	TCCCCTCCCACTGCTTCACTTGACTAGTA
1362	AC015651.6-001_1362	protein_coding_AC015651.6-001	CCATGCTAGAGAACTGGAGGGG
1363	hsa-let-7c_1363	miRNA_hsa-let-7c	TGAGGTAGTAGGTTGTGTGGTTTATA
1364	CDC42SE1-207_1364	protein_coding_CDC42SE1-207	GCTCGGGTGGTGGAATTGGCAG
1365	AC026461.7-001_1365	protein_coding_AC026461.7-001	CTGGAAAGGGGCGTCAGAG
1366	hsa-mir-4429_1366	miRNA_hsa-mir-4429	AAAAGCTGGGCTGAGAGGAAAA
1367	hsa-mir-320b-1_1367	miRNA_hsa-mir-320b-1	CAAACGCTGGGTTGAGAGGGC
1368	RNY4P20-201_1368	YRNA_RNY4P20-201	GGCTGGGCCGATGGTAGTGGGTTATCAGAAA
1369	hsa-mir-30c-2_1369	miRNA_hsa-mir-30c-2	GTACACATCCTACACTCTCAGCT
1370	RP11-56D16.7-006_1370	protein_coding_RP11-56D16.7-006	TAAACTCAGCTGTGGGACCAGA
1371	ENST00000490232.3_1371	other_TMapped_ENST00000490232.3	GAGCCTGAGCAACATAGCGAGACCCCGTCTCTTA
1372	ENST00000387372.1_1372	other_TMapped_ENST00000387372.1	TAGGATGGGGGGTGATAGGTGGCACGGAGAATTA
1373	RNY4-201_1373	YRNA_RNY4-201	ACCCCCCACTGCTAAATTTGACTGACTTTT
1374	ENST00000534610.5_1374	other_TMapped_ENST00000534610.5	TGAAGACTGAAGTGGAGAAT
1375	hsa-mir-106b_1375	miRNA_hsa-mir-106b	TAAAGTGCTGACAGTGCAGATC
1376	hsa-mir-142_1376	miRNA_hsa-mir-142	ACCATCAAGTAGAAAGCACT
1377	ENST00000387441.1_1377	other_TMapped_ENST00000387441.1	TGAATCTGACAACAGAGGATTACGACCCCTTCCA
1378	AC004943.2-005_1378	protein_coding_AC004943.2-005	GGAGGAGGAAGAGGCGGAAG
1379	ENST00000566331.1_1379	other_TMapped_ENST00000566331.1	AGCTGGTTCTCCTCGAAATGTA
1380	ENST00000389680.2_1380	other_TMapped_ENST00000389680.2	ATCGATAAACCCCGATCAACCTCACCACCTC
1381	AC099340.3-001_1381	protein_coding_AC099340.3-001	CGGCGGGGTCTGGGGGCCG
1382	hsa-mir-7-1_1382	miRNA_hsa-mir-7-1	AACAAATCACAGTCTGCC
1383	RNY4-201_1383	YRNA_RNY4-201	CACCCCACTGCTAAATTTGACTGGATTTTTT
1384	RP3-363I18.1-024_1384	protein_coding_RP3-363I18.1-024	AGTCCCTCCGCCGCCTCCA
1385	ENST00000387372.1_1385	other_TMapped_ENST00000387372.1	TAGGATGGGGTGTGATGGGTGGCACGGAGA
1386	hsa-mir-28_1386	miRNA_hsa-mir-28	CAAGGAGCTCACAGTCTATTGAT
1387	WBP1L-202_1387	protein_coding_WBP1L-202	ACTTCACCGGTGGGCAGGCAAGA
1388	ENST00000386347.1_1388	other_TMapped_ENST00000386347.1	TCGCATAAAACTTAAAACTT
1389	RP11-133N21.3-001_1389	protein_coding_RP11-133N21.3-001	CAGGCTGGGGGCAGATGCCA
1390	hsa-mir-629_1390	miRNA_hsa-mir-629	TGGGTTTACGTTGGGAGAGC
1391	ENST00000387347.2_1391	other_TMapped_ENST00000387347.2	TGAGTTCAGACCGGAGTAATCCAGGTCGGTTAAAA
1392	RP11-81F11.1-001_1392	protein_coding_RP11-81F11.1-001	ATGGGCATGGGAGCGAAAG
1393	RNY4-201_1393	YRNA_RNY4-201	CCCCCCACTGCTAAATTTTACTGGCTTTTTT
1394	hsa-mir-30c-2_1394	miRNA_hsa-mir-30c-2	TGTAAACATCCTACACTTTCAGCT
1395	RBMS1-202_1395	protein_coding_RBMS1-202	TTTTGAATTCATAGAAAAGGA
1396	RNY4P24-201_1396	YRNA_RNY4P24-201	ACTACTAAATTTGACTGGTTT
1397	hsa-mir-125a_1397	miRNA_hsa-mir-125a	TCCCTGAGACCCTTTAACCTGTAAT
1398	hsa-let-7a-1_1398	miRNA_hsa-let-7a-1	TNAGGTAGTAGGTTGTATAGA
1399	IL6R-208_1399	protein_coding_IL6R-208	ACTGACACTGAGCCGGACCCGA
1400	tRNA-Pro-TGG-3-5_1400	tRNA_tRNA-Pro-TGG-3-5	CTAGGGGTATGATTCTCGCTT
1401	CDK19-203_1401	protein_coding_CDK19-203	AATTGCAAGGAAAATAGAAGGTC
1402	ENST00000389680.2_1402	other_TMapped_ENST00000389680.2	AATCACCACGATCAAAAGGGACAAGC
1403	AP005329.1-003_1403	protein_coding_AP005329.1-003	CCATGTCGAGCAAAAGAACAAAGT
1404	RP11-318L16.1-006_1404	protein_coding_RP11-318L16.1-006	AAAGGAGGAGGAGGAGGAGA
1405	AP000295.8-001_1405	protein_coding_AP000295.8-001	ATGGGAGGAGGAGGAGGAGGT
1406	RP11-91K11.3-001_1406	protein_coding_RP11-91K11.3-001	AATGTCGTTGCCACTAGGAGA
1407	RP11-21A7A.1-001_1407	protein_coding_RP11-21A7A.1-001	GGCGTGGTGGCAGAGGGGTCTA
1408	ENST00000387421.1_1408	other_TMapped_ENST00000387421.1	AAGATTAAGAGAACCAACACCT
1409	RP11-659O3.4-001_1409	protein_coding_RP11-659O3.4-001	GGTTCAGCTGTCTCTTACTTAA
1410	hsa-mir-92a-1_1410	miRNA_hsa-mir-92a-1	TATTGCACTTGTCCCGGCCTCAA
1411	RNY4P17-201_1411	YRNA_RNY4P17-201	GGCTGGTACGATGGTAGCGGGTTATCAGAACA
1412	hsa-mir-411_1412	miRNA_hsa-mir-411	TAGTAGACCGTATAGCGTACGC
1413	ENST00000435127.1_1413	other_TMapped_ENST00000435127.1	TTTTTGCCATCTCTGCTC
1414	hsa-mir-15b_1414	miRNA_hsa-mir-15b	TAGCAGCACATCATGGCTTGT
1415	hsa-mir-151a_1415	miRNA_hsa-mir-151a	CTAGACTGAAGCTCCTTGAGGAATTT
1416	hsa-mir-576_1416	miRNA_hsa-mir-576	GAAGATGTGGAAAAATTGGAATCC
1417	RNY4P10-201_1417	YRNA_RNY4P10-201	GGTCCGATGGTAGTGGGCTATCAGACC
1418	ENST00000537212.1_1418	other_TMapped_ENST00000537212.1	GGTCTCCTCCATCCTTCTTG
1419	RP11-129O7.1-002_1419	protein_coding_RP11-129O7.1-002	GAGAAACATGGCCGGGAGCAGC
1420	RP11-564A8.2-006_1420	protein_coding_RP11-564A8.2-006	TTCTGCAGAACCTCCTGCCC
1421	hsa-mir-223_1421	miRNA_hsa-mir-223	TATTTGACAAGCTGAGTTGGACA
1422	hsa-mir-3120_1422	miRNA_hsa-mir-3120	ACAGCAGGCACAGACAGGAAT
1423	RNY4P16-201_1423	YRNA_RNY4P16-201	CCATGGTAGTGGGTTATCAGAACT
1424	AC073284.2-007_1424	protein_coding_AC073284.2-007	TAACTTCTCGAATCGCAAGGCC
1425	RP11-845C23.1-043_1425	protein_coding_RP11-845C23.1-043	AGTCGTCTTCTCTCTCTTG
1426	ENST00000389680.2_1426	other_TMapped_ENST00000389680.2	GTTCCAGTGGGTTCACCCTCTAAATCACC
1427	RNY4P7-201_1427	YRNA_RNY4P7-201	TGGCTGGTCCGATGGTAGTGGGTTCTCAGAACA
1428	ENST00000387347.2_1428	other_TMapped_ENST00000387347.2	AAATTTCGGTTGGAGCGACCTCGGAGCAG
1429	RNY4P18-201_1429	YRNA_RNY4P18-201	GCCCCCCACTGTTAAATTTGACTGGCTTA
1430	hsa-mir-451b_1430	miRNA_hsa-mir-451b	AGCCGTTACCATTACTGAGTTTAGT
1431	hsa-mir-151a_1431	miRNA_hsa-mir-151a	TACTAGACTGAAGCTCCTCGAGA
1432	RNY4-201_1432	YRNA_RNY4-201	CCCCCCAATGCTAAATTTGACTGGCTTT
1433	ENST00000387460.2_1433	other_TMapped_ENST00000387460.2	GTCCTTGGAAAAAGGTTTTCATCTCCGGCG
1434	ENST00000484584.2_1434	other_TMapped_ENST00000484584.2	ACGTCAAGTCATCATGCCCCT
1435	hsa_piR_021214|gb|DQ599147|Homo_sapiens_1435	piRNA_hsa_piR_021214|gb|DQ599147|Homo_sapiens	CTGATCACGCCAAGGTCGCGGGT
1436	RP1-85F18.3-001_1436	protein_coding_RP1-85F18.3-001	GAGCGGGCGAGAGTGGGC
1437	ENST00000623027.1_1437	other_TMapped_ENST00000623027.1	AAGGGTTGTGTGCGTTGGG
1438	AP005379.1-001_1438	protein_coding_AP005379.1-001	GTGCCGACACTTCCCTGACC
1439	RP11-454E5.2-010_1439	protein_coding_RP11-454E5.2-010	TATAGGGTGGAGCCAGAGGAAACT
1440	hsa-mir-16-1_1440	miRNA_hsa-mir-16-1	TAGCAGCACGTAAATATTGACGA
1441	RNY4-201_1441	YRNA_RNY4-201	CCCCCCCACTGCTAAATTTGACTGGCTATTTT
1442	RP11-67M24.4-008_1442	protein_coding_RP11-67M24.4-008	AAAGGCTGGTGGTGGGAGAA
1443	ENST00000364950.1_1443	other_TMapped_ENST00000364950.1	TATACAACCCCCACTGCTAAATTTGACTGGTA
1444	RNY4P6-201_1444	YRNA_RNY4P6-201	CACCCCATTGCTAAATTTGACTGGCTT
1445	RNY4P27-201_1445	YRNA_RNY4P27-201	GACTGGTCCGCTGGTAGTGGGTTATCAGAACT
1446	ENST00000574245.1_1446	other_TMapped_ENST00000574245.1	CCCCAGCCTGAGCAACATAGCGAGACCCCGTCTC
1447	hsa_piR_016659|gb|DQ592932|Homo_sapiens_1447	piRNA_hsa_piR_016659|gb|DQ592932|Homo_sapiens	CCACTGCTAAATTTGACTGGTA
1448	hsa-mir-485_1448	miRNA_hsa-mir-485	GCCCTACACGGCTCTCCTCTCT
1449	AL121577.2-001_1449	protein_coding_AL121577.2-001	AGCGCGGGAGCGGTTTGG
1450	RNY4-201_1450	YRNA_RNY4-201	GCTCCCCACTGCTAAATTTGACTGGCTTTT
1451	RP11-429J17.9-003_1451	protein_coding_RP11-429J17.9-003	GGATGAGCAGCCACACTGGG
1452	ENST00000389680.2_1452	other_TMapped_ENST00000389680.2	TCCCCATTCCAGTGAGTTCACCCTCTAAATCACC
1453	AC084337.9-007_1453	protein_coding_AC084337.9-007	CTGTGCTTGACTGAGGTTCG
1454	RNY4P23-201_1454	YRNA_RNY4P23-201	GCTAAATTTGACTGGCTTTTC
1455	hsa-mir-3184_1455	miRNA_hsa-mir-3184	AGCTCGGTCTGATGCCCCTCAGT
1456	RNY4-201_1456	YRNA_RNY4-201	CCCCCCACTGCTAAATTTGACTGGCNTTTTTTT
1457	ENST00000626779.2_1457	other_TMapped_ENST00000626779.2	TGCGGATGGATCACCTCCTTTCT
1458	ENST00000387441.1_1458	other_TMapped_ENST00000387441.1	TGAATCTGACAACAGAGGCTTACGACCCACCA
1459	DCUN1D1-208_1459	protein_coding_DCUN1D1-208	CCGGAGGAGGAGGGGAGAGGCCTGGAGGAC
1460	hsa-mir-150_1460	miRNA_hsa-mir-150	CTGGTACAGGCCTGGGGGAC
1461	hsa-mir-425_1461	miRNA_hsa-mir-425	CATCGGGAACGTCGTGTCCGC
1462	ENST00000587528.1_1462	other_TMapped_ENST00000587528.1	GTTCCCATCCTCCTCGCGC
1463	ENST00000504799.1_1463	other_TMapped_ENST00000504799.1	AACCCCACTCCTGGTACCAAT
1464	RNY1-201_1464	YRNA_RNY1-201	NGCTGGTCCGAAGGTAGTGAGTTATCTCAA
1465	RP11-645N11.2-002_1465	protein_coding_RP11-645N11.2-002	TCCCGGGTTTCGGCACCATTTT
1466	ENST00000387400.1_1466	other_TMapped_ENST00000387400.1	TTTGTGGGTTTAAGTCCCATTGGTCTAGTA
1467	ENST00000471395.1_1467	other_TMapped_ENST00000471395.1	AGCACTGTTTGGACTAGGGGG
1468	RP11-215L17.2-001_1468	protein_coding_RP11-215L17.2-001	CAAGGGAAAGATGAAAAATTATA
1469	ENST00000387377.1_1469	other_TMapped_ENST00000387377.1	AGCTATCGGGCCCATACCACCA
1470	AC018836.3-001_1470	protein_coding_AC018836.3-001	GTGCTCCGATCTGCTGAGGTT
1471	ENST00000365068.1_1471	other_TMapped_ENST00000365068.1	NGTCCGATGGTAGTAGGTTATCAG
1472	hsa-mir-374c_1472	miRNA_hsa-mir-374c	ATATAATACAACCTGCTAAGAGA
1473	RP11-487F23.2-013_1473	protein_coding_RP11-487F23.2-013	GACAGAAACTACAACCCCCAGG
1474	CTD-2373H9.1-011_1474	protein_coding_CTD-2373H9.1-011	GCGAGCGCGCGCGGGGCGGAA
1475	RP11-676E7.1-001_1475	protein_coding_RP11-676E7.1-001	ATCCTCGCTCCAGGGCTGTCT
1476	hsa-let-7f-2_1476	miRNA_hsa-let-7f-2	TGAGGTAGTAGATTATATAGA
1477	hsa-mir-29c_1477	miRNA_hsa-mir-29c	TGACCGATTTCTCCTGGTGTAA
1478	ENST00000492718.1_1478	other_TMapped_ENST00000492718.1	ATTCTTGTGGACATTTTGGAG
1479	RP11-110C15.3-001_1479	protein_coding_RP11-110C15.3-001	GGTACTCTTTGACACTGCATC
1480	MT-CO2-201_1480	protein_coding_MT-CO2-201	AAATCTTTGAAATAGGGCCCGTA
1481	hsa-mir-222_1481	miRNA_hsa-mir-222	AAGCTCCATCTGGCTACTGGGTCTCT
1482	tRNA-Arg-CCT-5-1_1482	tRNA_tRNA-Arg-CCT-5-1	CTAAGCCAGGGATTGTGGGTTCGA
1483	RNY4-201_1483	YRNA_RNY4-201	CCCCCACTGCTAAATTTGACC
1484	ENST00000383924.1_1484	other_TMapped_ENST00000383924.1	CTTCTCACTACTGCACTTGACTAGGA
1485	RNY4-201_1485	YRNA_RNY4-201	CCCCCCACTGCTAAATTTGACTGGCTATTTGT
1486	ENST00000363867.1_1486	other_TMapped_ENST00000363867.1	CTTCTCACTACTGCACTTTACTAGA
1487	tRNA-Gly-GCC-1-1_1487	tRNA_tRNA-Gly-GCC-1-1	GCATGGGCGGTTCAGTGGTAGAATTCTCGC
1488	hsa-mir-320b-1_1488	miRNA_hsa-mir-320b-1	AAAGCTGGGTTGAGAGGGCAATTT
1489	RNY4P6-201_1489	YRNA_RNY4P6-201	GGGCTGGTCCTATGGTAGTGGGTTATCAGAACT
1490	RP11-475E11.9-001_1490	protein_coding_RP11-475E11.9-001	AAATATGTAAGAAGACCTTG
1491	RNY4P7-201_1491	YRNA_RNY4P7-201	CAGGGCTGGTCCGATGGTAGTGGGTTATCAGA
1492	hsa-mir-324_1492	miRNA_hsa-mir-324	CGCATCCCCTAGGGCATTGGTGTTTTT
1493	ENST00000472036.1_1493	other_TMapped_ENST00000472036.1	AAGACTTGAGGAAGGAGGGGAT
1494	hsa_piR_022628|gb|DQ600952|Homo_sapiens_1494	piRNA_hsa_piR_022628|gb|DQ600952|Homo_sapiens	GTAGAGCATGAGACTCTTAATCTC
1495	ENST00000387419.1_1495	other_TMapped_ENST00000387419.1	AACCATTTCATAACTTTGTCAAAGTTAAA
1496	hsa-let-7i_1496	miRNA_hsa-let-7i	TGAGGAAGTAGTTTGTGCTGTTG
1497	hsa-mir-20b_1497	miRNA_hsa-mir-20b	CAAAGTGCCCATAGTGCAGGTA
1498	hsa-mir-30b_1498	miRNA_hsa-mir-30b	CTGGGAGGTGGATGTTTACCT
1499	RP11-92K15.2-012_1499	protein_coding_RP11-92K15.2-012	AGCCGCCGGGCCGCGCTCAGCAT
1500	RP11-467E3.2-001_1500	protein_coding_RP11-467E3.2-001	TTTTGCTGCAGTGTGGATGGTAA
1501	hsa-mir-126_1501	miRNA_hsa-mir-126	CGTACCGTGAGTAATAATGCGC
1502	hsa_piR_016745|gb|DQ593052|Homo_sapiens_1502	piRNA_hsa_piR_016745|gb|DQ593052|Homo_sapiens	GCCGCCGTAGTGTAGTGGTTATCA
1503	RP4-568C11.1-001_1503	protein_coding_RP4-568C11.1-001	CGGCCGCGCGGGCTGCCCCGA
1504	RNY3-201_1504	YRNA_RNY3-201	ACAACCACTCCCACTGCTTCACTTGACTAGCCTT
1505	ENST00000442996.1_1505	other_TMapped_ENST00000442996.1	TTTACTGTGGAAGGGTGAAAG
1506	RNY4P10-201_1506	YRNA_RNY4P10-201	GGTCCGATGGTAGTGGGTTATCAGAC
1507	RP5-1184F4.6-002_1507	protein_coding_RP5-1184F4.6-002	TCCGGGACTGGTGCTTGCGCAC
1508	hsa-mir-320a_1508	miRNA_hsa-mir-320a	AAAAGCTGGGTTGAGAGGGCGTAT
1509	tRNA-Gly-CCC-2-2_1509	tRNA_tRNA-Gly-CCC-2-2	CCGCTGGTGTAGTGGTATCATGCAA
1510	ENST00000469449.1_1510	other_TMapped_ENST00000469449.1	CGAGCCGCTGGGACTACAGGCGC
1511	RNY3P2-201_1511	YRNA_RNY3P2-201	CACCCACTGCTTCACTTGACTAGCCTA
1512	ENST00000469617.3_1512	other_TMapped_ENST00000469617.3	CAGGAGTTCTGGGCTGTAGTGCGTA
1513	AC004876.7-003_1513	protein_coding_AC004876.7-003	GTACAAGCAGTGGGCGCCTA
1514	tRNA-Glu-TTC-2-1_1514	tRNA_tRNA-Glu-TTC-2-1	ACATGGTCTCGCGGTTAGGATTCCT
1515	AC018693.1-011_1515	protein_coding_AC018693.1-011	AAATCCTTGGATTTATTGAA
1516	hsa-mir-185_1516	miRNA_hsa-mir-185	GGGGCTGGCTTTCCTCTGGTAA
1517	ENST00000362589.1_1517	other_TMapped_ENST00000362589.1	TTCTCACTATTGCACTTGACTAGTA
1518	ENST00000386347.1_1518	other_TMapped_ENST00000386347.1	AACTTTACAGTCAGAGGTTCAATTCCTCTTACCC
1519	RP11-64K12.2-002_1519	protein_coding_RP11-64K12.2-002	TGGCGGCGGATGGGGACGC
1520	MT-ATP6-201_1520	protein_coding_MT-ATP6-201	TAGACTTGTGAAGATGATAAGTGTAGAGGG
1521	ENST00000365544.1_1521	other_TMapped_ENST00000365544.1	CACTGCTTCACTTGACTAGCTATTT
1522	RNY4-201_1522	YRNA_RNY4-201	CCACTGCTAAATTTGACTGACTA
1523	ENST00000575471.2_1523	other_TMapped_ENST00000575471.2	GATTAAAGTGGCACGTGAACT
1524	RP11-727F15.8-001_1524	protein_coding_RP11-727F15.8-001	TTTTGGAAATAGGAGATGGAAT
1525	hsa-mir-30d_1525	miRNA_hsa-mir-30d	TGTAAACATCCCCGACTCGAAGT
1526	RNY3-201_1526	YRNA_RNY3-201	TCTCCACTCCCACTGCTTCACTTGCC
1527	hsa-mir-4433a_1527	miRNA_hsa-mir-4433a	AAGAGTGGGGGGTGGGACGTA
1528	hsa-mir-454_1528	miRNA_hsa-mir-454	ACCCTGTCAATATTGTCTCTGC
1529	hsa-mir-92a-1_1529	miRNA_hsa-mir-92a-1	TATTGCACTTGTCCCGGCCTAAAT
1530	AC007618.2-018_1530	protein_coding_AC007618.2-018	CGTACACTCTTTTTCACCT
1531	tRNA-Gln-TTG-3-3_1531	tRNA_tRNA-Gln-TTG-3-3	TGTAATGGTTAGCACTCTGGACTTTGAAT
1532	RP11-775L16.2-001_1532	protein_coding_RP11-775L16.2-001	CTGGGAGCGGGCGGGAGCGGGA
1533	AC004637.2-001_1533	protein_coding_AC004637.2-001	AGAGCCTGTGGGGTGACTCGGA
1534	ENST00000635274.1_1534	other_TMapped_ENST00000635274.1	GCCTGGGCAACATAGCGAGACCCCGTCTCTTA
1535	hsa-mir-181b-2_1535	miRNA_hsa-mir-181b-2	AACATTCATTGCTGTCGGTGGGTAGT
1536	hsa-mir-320b-1_1536	miRNA_hsa-mir-320b-1	AAAAGCAGGGTTGAGAGGGC
1537	ENST00000387347.2_1537	other_TMapped_ENST00000387347.2	CACAGAACCCTCTAAATCCCCTTGT
1538	hsa-mir-4440_1538	miRNA_hsa-mir-4440	GTGTCGTGGGGCTTGCTGGCTTG
1539	tRNA-Gly-TCC-3-1_1539	tRNA_tRNA-Gly-TCC-3-1	GCGTTGGTGGTATAGTGGTAAGCATAGCTGCT
1540	hsa_piR_019752|gb|DQ597110|Homo_sapiens_1540	piRNA_hsa_piR_019752|gb|DQ597110|Homo_sapiens	AGCGGAGTGGCGCAGCGGA
1541	ENST00000445125.2_1541	other_TMapped_ENST00000445125.2	TAGTTGGTGGAGTGATCTGTCT
1542	ENST00000476068.1_1542	other_TMapped_ENST00000476068.1	AGTTCCAGACATTGTCAGG
1543	hsa-mir-3912_1543	miRNA_hsa-mir-3912	ACGCATAATATGGACATGTTA
1544	AC107959.4-001_1544	protein_coding_AC107959.4-001	ACCATGGCTCCTGGACCCCAAG
1545	hsa-mir-15a_1545	miRNA_hsa-mir-15a	TAGCAGCACATAATGGTTTTG
1546	tRNA-Val-AAC-2-1_1546	tRNA_tRNA-Val-AAC-2-1	TGACAAGCGAAAGGTCCCCGGT
1547	RNY4-201_1547	YRNA_RNY4-201	ACCCCCACTGCTAAATTTGACTGGCTTTT
1548	ENST00000387347.2_1548	other_TMapped_ENST00000387347.2	TAAGGCCTACTTCACAAAGCGCCTTCCCCCG
1549	RP11-258C19.1-002_1549	protein_coding_RP11-258C19.1-002	AGAGGAAGTATGGGGGCTGA
1550	ENST00000389680.2_1550	other_TMapped_ENST00000389680.2	TTCACCCTCTAAATCACCACGATCAAAAGGA
1551	ENST00000387347.2_1551	other_TMapped_ENST00000387347.2	AATTTCGGTTGGGGCGACCTCGGAGCAGAACC
1552	ENST00000387459.1_1552	other_TMapped_ENST00000387459.1	ATTGGTCGTGGCTGTAGTCCGTGCGAGAATACC
1553	hsa-mir-222_1553	miRNA_hsa-mir-222	AGCTACATCTGGCTACTGGGGCTTTT
1554	ENST00000623075.1_1554	other_TMapped_ENST00000623075.1	ATTGCTAGCTCTTTCTTGA
1555	tRNA-Val-TAC-2-1_1555	tRNA_tRNA-Val-TAC-2-1	AGGTCCTGGGTTCGAGCCCCAGTGAAA
1556	RNY4P7-201_1556	YRNA_RNY4P7-201	AGCTGGTCCGATGGTAGTGGGTTTTCAGAAC
1557	hsa-mir-223_1557	miRNA_hsa-mir-223	TGTCAGNTTGTCAAATACCCCA
1558	hsa-mir-652_1558	miRNA_hsa-mir-652	AATGGCGCCACTAGGGTTGT
1559	ENST00000413446.5_1559	other_TMapped_ENST00000413446.5	GTTCACCTCCTGTACCCTG
1560	RP11-91J19.1-001_1560	protein_coding_RP11-91J19.1-001	AGGGACGCCGGAGCCCGCCTGA
1561	RP11-621D6.1-001_1561	protein_coding_RP11-621D6.1-001	AACGGTAGAGCATGATACTG
1562	XX-FW81657B9.2-002_1562	protein_coding_XX-FW81657B9.2-002	CGAGGAGGAAGAGGAGGCGG
1563	ENST00000387342.1_1563	other_TMapped_ENST00000387342.1	CTTAGGAGATTTCAACTTAACTTGACCGAA
1564	ENST00000645513.1_1564	other_TMapped_ENST00000645513.1	TGGAGCTGAGCTGGGCAGGAAA
1565	ENST00000496780.3_1565	other_TMapped_ENST00000496780.3	GGGTTCTGGGCTGTAGTGCGC
1566	ENST00000387459.1_1566	other_TMapped_ENST00000387459.1	TTGGTCGTGGATGTAGTCCGTGCGAGAATACCA
1567	tRNA-Glu-CTC-1-7_1567	tRNA_tRNA-Glu-CTC-1-7	TAGTGGTTAGGATTCGGCGCTCTCACCGC
1568	hsa_piR_020008|gb|DQ597482|Homo_sapiens_1568	piRNA_hsa_piR_020008|gb|DQ597482|Homo_sapiens	CACACCCGTCTATGTAGCA
1569	ENST00000387377.1_1569	other_TMapped_ENST00000387377.1	GAAAATGTTGGTTATACCCTTCCCGTACTACAA
1570	ENST00000461972.5_1570	other_TMapped_ENST00000461972.5	TAGCGGGAGGTGGTGGGGCC
1571	RNY3-201_1571	YRNA_RNY3-201	GGCTGGTCCGAGTGCAGTGGTGTGTACCAC
1572	AC003003.3-001_1572	protein_coding_AC003003.3-001	TAGGATGGGGTGTGATAGC
1573	ENST00000546592.1_1573	other_TMapped_ENST00000546592.1	TTCCGCCGAAGCTTCCCTCAG
1574	hsa-mir-486-2_1574	miRNA_hsa-mir-486-2	ACCCGTACTGAGCTGCCCCGA
1575	RNY4P10-201_1575	YRNA_RNY4P10-201	GCTGGTCCGATGGTAGTGGGTTATCCGAGCT
1576	hsa_piR_016984|gb|DQ593431|Homo_sapiens_1576	piRNA_hsa_piR_016984|gb|DQ593431|Homo_sapiens	TGGGCCCATAACCCAGAGGTCGATGG
1577	ENST00000365193.1_1577	other_TMapped_ENST00000365193.1	GTTAGTACTAGGGTGGGGGAC
1578	RP11-139H15.3-002_1578	protein_coding_RP11-139H15.3-002	AAAGATCAAAATGGAAAACAAGGAA
1579	RP11-678L3.1-001_1579	protein_coding_RP11-678L3.1-001	ACAGAAGAAGAAGAAGGAGGGAA
1580	MT-CO3-201_1580	protein_coding_MT-CO3-201	CATTAGGAGGGCTGAGAGGGCCCCTA
1581	RNY4P10-201_1581	YRNA_RNY4P10-201	GGGTGGTCCGATGGTAGTGGGTTATCAGAACTC
1582	RNY4P10-201_1582	YRNA_RNY4P10-201	GGCTGGTCCGATGGTAGTGGGTTATAAGACC
1583	RP11-108L7.2-001_1583	protein_coding_RP11-108L7.2-001	CTGGACTGAAGCTCCTAGAGG
1584	tRNA-Cys-GCA-15-1_1584	tRNA_tRNA-Cys-GCA-15-1	GGGGGTATAGCTCAGGGGTAGA
1585	ENST00000445125.2_1585	other_TMapped_ENST00000445125.2	AGTTGGTGGAGTGATTTGA
1586	AC027336.1-001_1586	protein_coding_AC027336.1-001	TGGAGCAGCCACTGGTGCA
1587	hsa-mir-25_1587	miRNA_hsa-mir-25	CATTGCACTTGTCTCGGTCTAAA
1588	hsa-mir-103b-1_1588	miRNA_hsa-mir-103b-1	AGCATTGTACAGGGCTATTA
1589	hsa_piR_000823|gb|DQ571031|Homo_sapiens_1589	piRNA_hsa_piR_000823|gb|DQ571031|Homo_sapiens	GTTGGTGGTATAGTGGTG
1590	ENST00000387347.2_1590	other_TMapped_ENST00000387347.2	GACCTCGATGTTGGATCAGGACATCCCGATGGTGC
1591	RP4-747G18.4-003_1591	protein_coding_RP4-747G18.4-003	CTGCGCCCGCCGCCCGCCCCGAC
1592	RP5-963K15.1-002_1592	protein_coding_RP5-963K15.1-002	CCTTCGGGGTGGTGGGGACT
1593	hsa-mir-12136_1593	miRNA_hsa-mir-12136	AAAAAGTCATGGAGGCCATGGGGTACA
1594	RNY4-201_1594	YRNA_RNY4-201	ATACAACCCCTCACTGCTAAATTTGACTGGCTTTT
1595	ENST00000387460.2_1595	other_TMapped_ENST00000387460.2	GTCCTTGGAAACAGGTTTTCATCTCCGGC
1596	ENST00000491297.6_1596	other_TMapped_ENST00000491297.6	GAAGCAAGAAGAAGAGGAAGAAGAANG
1597	RNY4-201_1597	YRNA_RNY4-201	CCCCCACTGCTAAAATTGACTGGCTT
1598	hsa-mir-200c_1598	miRNA_hsa-mir-200c	TAATCCTGCCGGGTAATGAT
1599	hsa-mir-223_1599	miRNA_hsa-mir-223	GTCCGTTTGTCAAATACCCC
1600	hsa-mir-190a_1600	miRNA_hsa-mir-190a	TGATCTGTTTGATATATTAGG
1601	ENST00000467298.1_1601	other_TMapped_ENST00000467298.1	TTTTGATCTGAGATGAAGTGAG
1602	hsa-mir-483_1602	miRNA_hsa-mir-483	AAGACGGGAGGAAAGGAGGGAGAA
1603	hsa-mir-146b_1603	miRNA_hsa-mir-146b	GCCCTGTGGACTCAGTTCTGGTA
1604	tRNA-Thr-TGT-2-1_1604	tRNA_tRNA-Thr-TGT-2-1	GCCTCCATAGCTCAGTGGTT
1605	hsa-mir-21_1605	miRNA_hsa-mir-21	TAGCTTATCAGACTGAGGTTGAC
1606	ENST00000583863.1_1606	other_TMapped_ENST00000583863.1	TCTACAGTCCGGACGATCTGTA
1607	hsa-mir-671_1607	miRNA_hsa-mir-671	CCGGTTCTCAGGGCTCCACCAA
1608	RP11-56A21.2-003_1608	protein_coding_RP11-56A21.2-003	GGAGAAGTTTGAGTGGCTGTGGAGCTCTGGGTG
1609	hsa-mir-3120_1609	miRNA_hsa-mir-3120	ACAGCAGGCACAGACAGGCAGTAA
1610	hsa-mir-21_1610	miRNA_hsa-mir-21	AGTTTATCAGACTGATGTTG
1611	ENST00000387459.1_1611	other_TMapped_ENST00000387459.1	TTGGTCGTGGTTGCAGTCCGTGCGAGAATACCA
1612	AC005609.3-002_1612	protein_coding_AC005609.3-002	GCACCAGAAGGCGGTAGGGCGTGG
1613	RNY4P17-201_1613	YRNA_RNY4P17-201	GGCTGGTCCGATGGTAGCGGGTTATCAGAGCTT
1614	AC107382.1-005_1614	protein_coding_AC107382.1-005	CGCCCGTCCGGCGCACACT
1615	RNY4P30-201_1615	YRNA_RNY4P30-201	CCCCCCACTGCTAAATTTAAA
1616	ENST00000535934.2_1616	other_TMapped_ENST00000535934.2	TGGGTCTGAGGGAGGAATGGAGA
1617	tRNA-Glu-CTC-1-7_1617	tRNA_tRNA-Glu-CTC-1-7	TAGTGGTTAGGATTCGGCGCTCTCACCGCAGC
1618	ENST00000363745.1_1618	other_TMapped_ENST00000363745.1	CCCCCCCTGCTAAATTTGACTGGCTTTTA
1619	MT-ND2-201_1619	protein_coding_MT-ND2-201	ATTAATCCCCTGGCCCAACCCGTC
1620	hsa-let-7b_1620	miRNA_hsa-let-7b	TGAGGTAGTAGGTTGTGTGGTGCG
1621	AC111149.2-005_1621	protein_coding_AC111149.2-005	AAATTCGAATGGCGAGGATGGCA
1622	ENST00000387347.2_1622	other_TMapped_ENST00000387347.2	AACTGAACTCCTCACACCCAATTA
1623	ENST00000387459.1_1623	other_TMapped_ENST00000387459.1	TCGTGGTTGTAGTCCGTGCGAGAATACNA
1624	RP1-234P15.5-001_1624	protein_coding_RP1-234P15.5-001	CAACAACATCCGCGAGATCGAG
1625	AC135048.9-002_1625	protein_coding_AC135048.9-002	TGGGCTCAAGTGAACCTCCCGT
1626	ENST00000387449.1_1626	other_TMapped_ENST00000387449.1	CATGCCCCCATGTCTAACAACATGGCTTTCT
1627	ENST00000459091.1_1627	other_TMapped_ENST00000459091.1	CCCCCCACTGCTAAATTTGACTGGTATAAAA
1628	hsa-mir-99a_1628	miRNA_hsa-mir-99a	CAAGCTCGCTTCTATGGGTC
1629	RP11-64K12.2-002_1629	protein_coding_RP11-64K12.2-002	ACACCACTGGGTCGTCCCGCCG
1630	ENST00000384486.2_1630	other_TMapped_ENST00000384486.2	TTTCTCTGAACGTGTAGAACACT
1631	ENST00000378334.3_1631	other_TMapped_ENST00000378334.3	CAGTGGTAGAGCATCGCCTTGC
1632	hsa-mir-323b_1632	miRNA_hsa-mir-323b	CCCAATACACGGTCGCCCTCT
1633	ENST00000387459.1_1633	other_TMapped_ENST00000387459.1	GGTTTTTCATATCATTGGTCGTGGTTGTAGTA
1634	tRNA-Gln-CTG-4-2_1634	tRNA_tRNA-Gln-CTG-4-2	TGAATCCAGCGATCGGAGTT
1635	tRNA-Glu-CTC-1-7_1635	tRNA_tRNA-Glu-CTC-1-7	TCTAGTGGTTAGGATTCGGCGCTCTCACCGCCGC
1636	AC126915.1-001_1636	protein_coding_AC126915.1-001	CGAAGGTGGTTTTCCCAGG
1637	hsa-mir-128-1_1637	miRNA_hsa-mir-128-1	GCACAGTGAACCGGTCTCTTTTT
1638	hsa-mir-143_1638	miRNA_hsa-mir-143	TGAGATGAAGCACTGTACCTCA
1639	tRNA-Glu-TTC-2-1_1639	tRNA_tRNA-Glu-TTC-2-1	ACCCACATGGTCTAGCGGTTAGGATTCC
1640	ENST00000365160.1_1640	other_TMapped_ENST00000365160.1	CGGGNCGGAGTTAGCTCAAGCGG
1641	ENST00000365532.1_1641	other_TMapped_ENST00000365532.1	TCCCACTGCTTCGCTTGACTAGTT
1642	AC093402.1-005_1642	protein_coding_AC093402.1-005	AGTTCTGACCAAATGGCTTTCT
1643	ENST00000387449.1_1643	other_TMapped_ENST00000387449.1	GAGAACGCTCACAAGAACTGC
1644	BTBD18-201_1644	protein_coding_BTBD18-201	CTCGGGGGGGGAGAGCACTGTA
1645	tRNA-Gly-CCC-1-1_1645	tRNA_tRNA-Gly-CCC-1-1	TCATTGGTGGTTCAGTGGTAGGATTCTCGCCT
1646	hsa-mir-451b_1646	miRNA_hsa-mir-451b	AAGACCGTTACCATTACTGAGTT
1647	RP11-423G4.3-001_1647	protein_coding_RP11-423G4.3-001	TCTGAGAGGATGAGCAGCC
1648	RP11-150L22.2-002_1648	protein_coding_RP11-150L22.2-002	TAGTCTGAGCTGTAAACAATG
1649	AC010542.7-006_1649	protein_coding_AC010542.7-006	AGAGCGCGTGGAGGACCGA
1650	RP13-766D20.3-002_1650	protein_coding_RP13-766D20.3-002	ATTTCTCTAGAGGCTGGCAAGA
1651	RP11-405F3.3-067_1651	protein_coding_RP11-405F3.3-067	TCTCAGCCTCTATTCCCTGGCTTAT
1652	RP1-278C19.5-015_1652	protein_coding_RP1-278C19.5-015	TATCCGGGGGAATGTGGGCTTT
1653	AC040162.22-012_1653	protein_coding_AC040162.22-012	ACGCTCATCAGACACCACA
1654	MT-CO2-201_1654	protein_coding_MT-CO2-201	GGACTAGGAAGCAGATAAGGAAAATAATTATGAGG
1655	RNY4P25-201_1655	YRNA_RNY4P25-201	TATACAACCCCCCCACTGCTAAATTTGACTGGCT
1656	RP3-363I18.1-019_1656	protein_coding_RP3-363I18.1-019	AGAAGAGGAGAAGAGGAA
1657	ENST00000364300.1_1657	other_TMapped_ENST00000364300.1	ATAATTTGTGGTAGTGGGGGACT
1658	RNY4-201_1658	YRNA_RNY4-201	CCCCCCACTGCTAAATTCGACTGGCTAAA
1659	hsa-mir-223_1659	miRNA_hsa-mir-223	TGTCAGTTTGTCAAATCCCCCTA
1660	tRNA-Asn-GTT-1-1_1660	tRNA_tRNA-Asn-GTT-1-1	GAGGTTGGTGGTTCGATCCC
1661	CTB-79E8.1-003_1661	protein_coding_CTB-79E8.1-003	ATGGCTGGCGCTGAAGCGGGCC
1662	hsa-mir-99a_1662	miRNA_hsa-mir-99a	AACCCGTAGATCCGATCTTTTG
1663	RP11-830F9.1-001_1663	protein_coding_RP11-830F9.1-001	CATCCTGGGGCTGGGGCAG
1664	AC003075.3-002_1664	protein_coding_AC003075.3-002	TGCCCCGGACCGCCAGCTCAG
1665	tRNA-Trp-CCA-5-1_1665	tRNA_tRNA-Trp-CCA-5-1	TTGCGTGTTCAAATCACGTCGGGGTCATCA
1666	hsa-mir-10b_1666	miRNA_hsa-mir-10b	TACCCTGTAGAACCGAATTTGAAA
1667	RNY4P7-201_1667	YRNA_RNY4P7-201	CGGCTGGTCCGATGGTAGTGGCTTATCAGAACT
1668	tRNA-Gln-CTG-4-2_1668	tRNA_tRNA-Gln-CTG-4-2	ACTCTGGACTCTGAATCCAGC
1669	hsa-let-7b_1669	miRNA_hsa-let-7b	GAGGCAGTAGGTTGTGTGGTTT
1670	RNY4-201_1670	YRNA_RNY4-201	CGGCCGCCCCCCACTGCTAAATTTGACTGGCTT
1671	RNY4-201_1671	YRNA_RNY4-201	CCACTGCTAAATTTGACTGGCTTAT
1672	ENST00000387400.1_1672	other_TMapped_ENST00000387400.1	TAACTAAGTGTTTGTGGGTTTAAGTCCA
1673	hsa-mir-628_1673	miRNA_hsa-mir-628	AGTAAGAGTGGCAGTCGA
1674	AC137932.3-019_1674	protein_coding_AC137932.3-019	GGGCGGAGGAGGGAGCGCCC
1675	ENST00000569689.1_1675	other_TMapped_ENST00000569689.1	CCTCCCACTCCTGACACCA
1676	RNY4-201_1676	YRNA_RNY4-201	CCCTCTCCCCCCACTGCTAAATTTGACTGGCTT
1677	hsa-mir-584_1677	miRNA_hsa-mir-584	TTATGGTTTGCCTGGGCCTTT
1678	ENST00000531207.5_1678	other_TMapped_ENST00000531207.5	TGAAAAGCAATTTGGAAAGA
1679	hsa-mir-30e_1679	miRNA_hsa-mir-30e	TGTAAAGATCCTTGACTGGAAG
1680	RP11-229P13.11-001_1680	protein_coding_RP11-229P13.11-001	TACTGTCTTCTCCATCCTT
1681	hsa-mir-181b-2_1681	miRNA_hsa-mir-181b-2	AACATTCATTGCTGTCGGTGAT
1682	hsa_piR_016945|gb|DQ593356|Homo_sapiens_1682	piRNA_hsa_piR_016945|gb|DQ593356|Homo_sapiens	GGCTAGCTCAGTCGGTAGAGCATGGTA
1683	hsa-mir-191_1683	miRNA_hsa-mir-191	GCTGCGCTTGGATTTCGTCCGC
1684	RNY4-201_1684	YRNA_RNY4-201	CCCCCCACTGTTAAATTTGACTGGCTTTTTA
1685	hsa-mir-3191_1685	miRNA_hsa-mir-3191	TGGGGACGTAGCTGGCCAGACAG
1686	hsa-let-7a-1_1686	miRNA_hsa-let-7a-1	TGAGGTAGTAGGTTGTATAT
1687	tRNA-Lys-CTT-4-1_1687	tRNA_tRNA-Lys-CTT-4-1	GTCGGTAGAGCATGGGACTCTTAA
1688	tRNA-Glu-TTC-2-2_1688	tRNA_tRNA-Glu-TTC-2-2	CCACATGGTCTAGCGGTTAGGATTCCTGG
1689	tRNA-Asp-GTC-1-1_1689	tRNA_tRNA-Asp-GTC-1-1	TGGCTAGTATCCCCGCCTGT
1690	hsa_piR_020450|gb|DQ598104|Homo_sapiens_1690	piRNA_hsa_piR_020450|gb|DQ598104|Homo_sapiens	AGGGAGATGAAGAGGACAGTGACTGAGAGAA
1691	hsa-mir-412_1691	miRNA_hsa-mir-412	TGGTCGACCAGTTGGAAAG
1692	hsa-mir-486-2_1692	miRNA_hsa-mir-486-2	CCTGTACTGAGCTGCCCCGAGGA
1693	ENST00000604565.1_1693	other_TMapped_ENST00000604565.1	AAATCACCTGTAGAGTGTAAGGG
1694	ENST00000387400.1_1694	other_TMapped_ENST00000387400.1	TTACCTAAGTGTTTGTGGGTT
1695	ENST00000387405.1_1695	other_TMapped_ENST00000387405.1	TCGAAGAAGCAGCTTCAAACCTGCCGGGGCTTA
1696	tRNA-Arg-TCG-3-1_1696	tRNA_tRNA-Arg-TCG-3-1	GGATCAGAAGATTGAGGGT
1697	hsa-mir-339_1697	miRNA_hsa-mir-339	TCCCTGTCCTCCAGGAGCTCTCG
1698	ENST00000485656.1_1698	other_TMapped_ENST00000485656.1	CCCGTCATGAGCTCTGTAAAT
1699	RNY4P10-201_1699	YRNA_RNY4P10-201	CTGGTCCGATGGTAGTGGGTTATTAGAA
1700	ENST00000420330.1_1700	other_TMapped_ENST00000420330.1	CATCCCAAATCTGAAAATCCA
1701	hsa-mir-22_1701	miRNA_hsa-mir-22	AAGCTGCCAGTTGAAGATCTGT
1702	hsa-mir-26a-2_1702	miRNA_hsa-mir-26a-2	TTCAAGTAATCCAGGATAGA
1703	ENST00000389680.2_1703	other_TMapped_ENST00000389680.2	GGTCGAAGGTGGATTTAGCAG
1704	Z84721.5-006_1704	protein_coding_Z84721.5-006	TGGGGTAAGGTCGGCGCGCACG
1705	ENST00000469269.1_1705	other_TMapped_ENST00000469269.1	CCAGCCTGAGCAACATAGTGAGACCCCGTCTCTA
1706	hsa_piR_009295|gb|DQ582567|Homo_sapiens_1706	piRNA_hsa_piR_009295|gb|DQ582567|Homo_sapiens	GCATTGGTGGTTCAGTGGTAGAATTCTCGTCC
1707	ENST00000450155.5_1707	other_TMapped_ENST00000450155.5	ACTCTTAGAATCTCCAAAGCA
1708	hsa-mir-142_1708	miRNA_hsa-mir-142	CCATAAAGTAGAAAGCACT
1709	RP11-193F22.2-001_1709	protein_coding_RP11-193F22.2-001	CAAGATGAGCTCTCCCGGGG
1710	ENST00000387377.1_1710	other_TMapped_ENST00000387377.1	GTAAGGTCAGCTAAATAAGCTATCGGGCCCATACA
1711	tRNA-Glu-CTC-1-1_1711	tRNA_tRNA-Glu-CTC-1-1	AGGTTAGGATTCGGCGCTC
1712	hsa-mir-3138_1712	miRNA_hsa-mir-3138	GCCCGTGAGGTAGAGGGAGTGC
1713	RP11-544K18.1-001_1713	protein_coding_RP11-544K18.1-001	TAGTAGCAATTATTCAAATGAA
1714	AC084209.1-005_1714	protein_coding_AC084209.1-005	ATGTCAGCAGGGCCTATGG
1715	XXbac-BPG254B15.9-009_1715	protein_coding_XXbac-BPG254B15.9-009	TGGTCATGATGTCAAAACTAAGTTCTGACT
1716	RNY4P10-201_1716	YRNA_RNY4P10-201	GGCTGGTCCGATGGTAGTGGGTTCTCAGAACAAAA
1717	ENST00000387419.1_1717	other_TMapped_ENST00000387419.1	CCTATAATTTAACTTTGACA
1718	hsa-mir-103b-1_1718	miRNA_hsa-mir-103b-1	AGCAGCATTGTACAGGGCTATATA
1719	RNY4-201_1719	YRNA_RNY4-201	CCCCCACTGCTAAATTTGACCGGCTTTTTTTT
1720	RNY4P10-201_1720	YRNA_RNY4P10-201	TGCTGGTCCGATGATAGTGGGTTATCAGAACTT
1721	hsa-mir-95_1721	miRNA_hsa-mir-95	TTCAACGGGTATTTATTGCG
1722	tRNA-Gly-CCC-1-1_1722	tRNA_tRNA-Gly-CCC-1-1	GCATTGTTGGTTCAGTGGTAGAATTCTCGCC
1723	RP11-167N5.1-009_1723	protein_coding_RP11-167N5.1-009	GCCGGACTGTGGCCCTGGC
1724	ENST00000485438.1_1724	other_TMapped_ENST00000485438.1	CCTTCACTGGGTGTGGTGGGGA
1725	CTD-2542M24.1-007_1725	protein_coding_CTD-2542M24.1-007	GGACTCTAACCACAAGCGGAAC
1726	RP1-232K4.1-001_1726	protein_coding_RP1-232K4.1-001	TCAAGGAAGAGGAGGAGGATT
1727	ENST00000363899.1_1727	other_TMapped_ENST00000363899.1	TCCCACTGCTTCACTTGACTATT
1728	RP11-787I22.2-001_1728	protein_coding_RP11-787I22.2-001	TATACGACCTGATGCCTTT
1729	RP11-674E16.2-002_1729	protein_coding_RP11-674E16.2-002	CTTCCCTTCTGTAACCATAA
1730	ENST00000516950.1_1730	other_TMapped_ENST00000516950.1	GGCTGGTCCAATGGTAGTGGGTTATCAGAACTG
1731	ENST00000387347.2_1731	other_TMapped_ENST00000387347.2	CATATAACTGAACTCCTCACACCCAATTGGAAA
1732	RP11-413E1.1-001_1732	protein_coding_RP11-413E1.1-001	AACTCACCAGCCTGGAACGCCTGA
1733	hsa-mir-92a-1_1733	miRNA_hsa-mir-92a-1	TATTGCACTTGTCCCGGCTGG
1734	hsa_piR_010894|gb|DQ584698|Homo_sapiens_1734	piRNA_hsa_piR_010894|gb|DQ584698|Homo_sapiens	GCCCCCATGTCTAACAACATGGCTA
1735	hsa-mir-223_1735	miRNA_hsa-mir-223	TGTCAGTTTGTCAAATCCC
1736	ENST00000387347.2_1736	other_TMapped_ENST00000387347.2	GACCTCGATGTTGGATCAGGACATCCCGA
1737	hsa-mir-584_1737	miRNA_hsa-mir-584	TATGGTTTGCCTGGGACTGAT
1738	RNY4P18-201_1738	YRNA_RNY4P18-201	CCACCCACTGCTAAATTTGACTGGCTTA
1739	hsa_piR_020326|gb|DQ597916|Homo_sapiens_1739	piRNA_hsa_piR_020326|gb|DQ597916|Homo_sapiens	GTGGTTCAGTGGTAGACTTCTCGCC
1740	RNY4-201_1740	YRNA_RNY4-201	CCCCCCCACTGCTAAATTTGACTGGCTTTATT
1741	RNY4P7-201_1741	YRNA_RNY4P7-201	TGCTGGTCCGATGGTAGTGGGTTATGAGAACT
1742	hsa-mir-223_1742	miRNA_hsa-mir-223	TGTCAGTTTGTCAAATACCCCACA
1743	ENST00000387461.2_1743	other_TMapped_ENST00000387461.2	AAAAGTCTTTAACTCCACCATTAGCAC
1744	ENST00000387382.1_1744	other_TMapped_ENST00000387382.1	AGTAAGTTGCAATACTTAATTTCT
1745	ENST00000384252.1_1745	other_TMapped_ENST00000384252.1	CTCTAAGAAGTTCTGAGCTT
1746	hsa-mir-496_1746	miRNA_hsa-mir-496	CTGAGTATTACATGGCCAATCTC
1747	RNY4-201_1747	YRNA_RNY4-201	GGTATACAACCCCCCACTGCCAAATTTGACTGGCT
1748	ENST00000516177.1_1748	other_TMapped_ENST00000516177.1	CCTTCTCCACTCCCACTGCTTCACTTGACTAGTAT
1749	RNY4-201_1749	YRNA_RNY4-201	GCACCCCACTGCTAAATTTGACTGGCTT
1750	TARS2-205_1750	protein_coding_TARS2-205	GATCCGTCCGCCTCAGCCTCTA
1751	hsa-mir-125a_1751	miRNA_hsa-mir-125a	TCCCTGAGACCCTTTATCCTGTGT
1752	AC005253.3-014_1752	protein_coding_AC005253.3-014	AAGTCCCGCCAACGCCACCA
1753	hsa-mir-376a-1_1753	miRNA_hsa-mir-376a-1	ATCATCGAGGAAAATCCACGTT
1754	hsa-mir-320c-1_1754	miRNA_hsa-mir-320c-1	GAAAAGCTGGGTTGAGAGGGAGT
1755	RNY4P10-201_1755	YRNA_RNY4P10-201	GGCTGGTCCGATGGTAGTGGGTTATCCGAAAA
1756	AC068669.4-002_1756	protein_coding_AC068669.4-002	AGGTGCAGTATCGGTGGGAGTATA
1757	IL17RC-206_1757	protein_coding_IL17RC-206	AAGTCGGGCAGCACGCAGCTGA
1758	hsa-mir-26a-2_1758	miRNA_hsa-mir-26a-2	AAGTAATCCAGGATAGGCTGT
1759	RNY4P28-201_1759	YRNA_RNY4P28-201	TACAACCCCACACTGCTAAATTTGACTGGCTTA
1760	AC008581.1-002_1760	protein_coding_AC008581.1-002	TCGGTCCCCTTGCTCGTTGC
1761	tRNA-Gly-GCC-2-6_1761	tRNA_tRNA-Gly-GCC-2-6	CACGCGGGAGGCCCGGGTTCGGTTCCCGGCCAATG
1762	ENST00000516952.1_1762	other_TMapped_ENST00000516952.1	TTTTCACTACTGCACTTGACTAG
1763	RP11-114B6.1-001_1763	protein_coding_RP11-114B6.1-001	TAAAAGGAACTCGGCAAA
1764	tRNA-Gln-CTG-4-2_1764	tRNA_tRNA-Gln-CTG-4-2	CACTCTGGACTCTGAATCCAGCGATCCGAGTTT
1765	hsa-mir-20a_1765	miRNA_hsa-mir-20a	TAAAGTTCTTATAGTGCAGGTAG
1766	hsa-mir-12136_1766	miRNA_hsa-mir-12136	GAAAAAGTCATGGAGGCCATAGGGTTAA
1767	hsa-mir-93_1767	miRNA_hsa-mir-93	ACTGCTGAGCTAGCACTTCCCGAA
1768	RNY4P10-201_1768	YRNA_RNY4P10-201	GGCTGGTCCGNTGGTAGTGGGTTATCANAGC
1769	ENST00000486003.1_1769	other_TMapped_ENST00000486003.1	GGCCTGCATTGCACATCGCGG
1770	hsa-mir-186_1770	miRNA_hsa-mir-186	CAAAGAATTCTCCTTTTGGGCG
1771	tRNA-Leu-CAG-1-1_1771	tRNA_tRNA-Leu-CAG-1-1	GGCACGATGGCCGAGCGGTCT
1772	hsa-mir-122b_1772	miRNA_hsa-mir-122b	TGGAGTGTGACAATGGTGTTCG
1773	tRNA-Ser-CGA-1-1_1773	tRNA_tRNA-Ser-CGA-1-1	GCTGCGATGGCCGAGTGGTTAAGGC
1774	ENST00000416946.1_1774	other_TMapped_ENST00000416946.1	TGAGAGTAGGACATCGTCAGGCT
1775	ENST00000630092.1_1775	other_TMapped_ENST00000630092.1	TTTCAGGGATCATTTCTATAGTGTGTTACT
1776	KB-1043D8.7-001_1776	protein_coding_KB-1043D8.7-001	ACAATCTGAACCAATTCT
1777	ENST00000387347.2_1777	other_TMapped_ENST00000387347.2	TCGATGTTGGATCAGGACATCCCGATGGTGCCA
1778	AL022393.8-007_1778	protein_coding_AL022393.8-007	AAGTCGAACGAATCCCACCTG
1779	hsa-mir-320a_1779	miRNA_hsa-mir-320a	AAAAGCTGGGTTGAGAGTGCGATG
1780	tRNA-Gly-TCC-3-1_1780	tRNA_tRNA-Gly-TCC-3-1	GCGTTTGTGGTATAGTGGTAAGCAT
1781	ENST00000424650.1_1781	other_TMapped_ENST00000424650.1	GAGAAGGGAGGGAGTAGAG
1782	hsa-mir-4690_1782	miRNA_hsa-mir-4690	GCAGCCCAGCTGAGGCCTCTGCTGTA
1783	ENST00000602813.1_1783	other_TMapped_ENST00000602813.1	GAGTGGCACACGTAGGGCA
1784	hsa-mir-27b_1784	miRNA_hsa-mir-27b	TTCCCAGTGGCTAAGTTCTG
1785	CCM2-218_1785	protein_coding_CCM2-218	CGGGGCGGGCCGGGCGGGCA
1786	CTD-3080F16.2-003_1786	protein_coding_CTD-3080F16.2-003	ACAGCAGTCTGCACATTGGTTTT
1787	hsa-mir-222_1787	miRNA_hsa-mir-222	AGCTACATCTGGCTACTGTGTCTCTTT
1788	ENST00000592302.5_1788	other_TMapped_ENST00000592302.5	TGTTCCAGATTTGTTTCATC
1789	RP11-846F4.3-001_1789	protein_coding_RP11-846F4.3-001	GGATGGTGCAGCCGCTATTAAAGGTTCGTTTG
1790	hsa-mir-12136_1790	miRNA_hsa-mir-12136	AAAAAGTCATGGAGGCCATGGGGTTGGACCCA
1791	hsa-mir-92a-1_1791	miRNA_hsa-mir-92a-1	TATTGCACTTGTCCCGCCCTGTA
1792	hsa-mir-28_1792	miRNA_hsa-mir-28	CACNAGATTGTGAGCTCCTGGA
1793	hsa-mir-25_1793	miRNA_hsa-mir-25	ATTGCCCTTGTCTCGGTCTGAC
1794	RP1-298J15.1-006_1794	protein_coding_RP1-298J15.1-006	CTTTCTTCCCGCATGCAGTTTT
1795	ENST00000387347.2_1795	other_TMapped_ENST00000387347.2	GGTCGGTTTCTATCTACTTCAAATTCCTC
1796	AC097473.1-008_1796	protein_coding_AC097473.1-008	TGAGTGTGTGTGTGAGTGTGTAAA
1797	BTK-209_1797	protein_coding_BTK-209	TGAGACGCTGGTGCAGTTGTATGG
1798	hsa-mir-337_1798	miRNA_hsa-mir-337	TCCTATATGATGCCTTTCTTC
1799	hsa-mir-338_1799	miRNA_hsa-mir-338	TCAGCCCCAGGATATTGTTGGAG
1800	hsa-mir-199a-1_1800	miRNA_hsa-mir-199a-1	ACAGTAGTCTGCACANTGGTTA
1801	RNY4P7-201_1801	YRNA_RNY4P7-201	CCCCTACTGCTAAATTTGACTGGCTTAAAT
1802	RP11-416A17.5-001_1802	protein_coding_RP11-416A17.5-001	TATTTTGTTGGTTTGCGTTAC
1803	ENST00000387377.1_1803	other_TMapped_ENST00000387377.1	AGTAGGGTCAGCTAAATAAGCTATCGGGCC
1804	tRNA-Lys-CTT-4-1_1804	tRNA_tRNA-Lys-CTT-4-1	GTGGGTTCGAGCCCCACGGTGGGCGCCC
1805	RP11-279P10.1-002_1805	protein_coding_RP11-279P10.1-002	GACTTGTTAGCTCAGTGGTAG
1806	AC007566.8-001_1806	protein_coding_AC007566.8-001	AAAGTACAACTGAAGGCAGA
1807	AC007535.2-001_1807	protein_coding_AC007535.2-001	CAAAGAATTCTCCCTTGGGC
1808	RP11-525G7.4-001_1808	protein_coding_RP11-525G7.4-001	GAAGTTGACATGGTAGAAGG
1809	hsa-mir-3529_1809	miRNA_hsa-mir-3529	TGGAAGAGTAGTGATTTTGTTGT
1810	ENST00000387456.1_1810	other_TMapped_ENST00000387456.1	CTATCCATTGGTCTTAGCCCCCA
1811	hsa-mir-92a-1_1811	miRNA_hsa-mir-92a-1	TATTGCACTTGTCCCGGTCTGTGT
1812	hsa_piR_018570|gb|DQ595536|Homo_sapiens_1812	piRNA_hsa_piR_018570|gb|DQ595536|Homo_sapiens	TTGGTTCAGTGGTAGAATTCTCGCCTG
1813	RP1-147M19.1-008_1813	protein_coding_RP1-147M19.1-008	AAGTGAACGTGGACATGCG
1814	RNY4-201_1814	YRNA_RNY4-201	TACAAGCCCCCACTGCTAAATTTGACTGGCTT
1815	ENST00000631292.1_1815	other_TMapped_ENST00000631292.1	GGGAGAGAACGCGGTCTGA
1816	tRNA-Pro-TGG-2-1_1816	tRNA_tRNA-Pro-TGG-2-1	TTTGGGTACGAGAGGTCCCGGGTT
1817	RNY4P27-201_1817	YRNA_RNY4P27-201	TGCTGGTCCGCTGGTAGTGGGTTATCAGAACT
1818	ENST00000363435.1_1818	other_TMapped_ENST00000363435.1	CTCCCACTGCTTCACTTGGCTAGCCTGA
1819	ENST00000362765.1_1819	other_TMapped_ENST00000362765.1	TCCACTCCCACTGCTTCACTTGACTAGA
1820	RP11-727F15.8-001_1820	protein_coding_RP11-727F15.8-001	CTTTGCCTTTTGGCTTAGATCAAGTGTAGTATCTG
1821	UNC5C-205_1821	protein_coding_UNC5C-205	GTACCTGTTGGTTTGTCCC
1822	hsa-mir-486-2_1822	miRNA_hsa-mir-486-2	CCTGTACTGAGCTGCCCCGCG
1823	hsa-mir-320a_1823	miRNA_hsa-mir-320a	AAAAGCTGGGTTGAGAGGGCGCCG
1824	ENST00000387441.1_1824	other_TMapped_ENST00000387441.1	TGAATCTGACAACAGAGGCTTACGACCCCTACCAA
1825	hsa-mir-487b_1825	miRNA_hsa-mir-487b	ATCGTACAGGGTCATCCACTTAT
1826	MT-ND4-201_1826	protein_coding_MT-ND4-201	GGGGTTTGGATGAGAATGGC
1827	RP11-358N2.1-001_1827	protein_coding_RP11-358N2.1-001	CAGCAGTAGGGAATCTTGGG
1828	hsa-mir-337_1828	miRNA_hsa-mir-337	ATCCTCTATGATGCCTTTCTTC
1829	hsa-mir-21_1829	miRNA_hsa-mir-21	TAGCTTATCAGACTGATGTTTGCT
1830	RP11-546D6.1-030_1830	protein_coding_RP11-546D6.1-030	TTGAAAAGAATGATTTCAG
1831	RNY4-201_1831	YRNA_RNY4-201	TACAACCTCCCACTGCTAAATTTGACTGGCTT
1832	tRNA-Glu-CTC-1-1_1832	tRNA_tRNA-Glu-CTC-1-1	TCCATGTGGTCTAGTGGTTAGGATTCGGCGCTCT
1833	RP11-831H9.15-001_1833	protein_coding_RP11-831H9.15-001	ACAGGGGCTGTCGGGGTG
1834	MT-CYB-201_1834	protein_coding_MT-CYB-201	TGTTTGGATATATGGAGGATGGGGAT
1835	ENST00000387347.2_1835	other_TMapped_ENST00000387347.2	ACCTGTATGAATGGCTCCACGAGGG
1836	hsa-mir-34a_1836	miRNA_hsa-mir-34a	TGGCCGTGTCTTAGCTGGTTGTT
1837	tRNA-Glu-CTC-1-7_1837	tRNA_tRNA-Glu-CTC-1-7	TGGTCTAGTGGTTCGGATTCGGCGCTCTC
1838	hsa-mir-10b_1838	miRNA_hsa-mir-10b	ANCCTGTAGAACCGAATTTGT
1839	ENST00000387421.1_1839	other_TMapped_ENST00000387421.1	AGCATTAACCTTTTAAGTTAAAGATTAAGA
1840	ENST00000363899.1_1840	other_TMapped_ENST00000363899.1	CTCCCACTGCTTCACTTGACTATA
1841	hsa-mir-1229_1841	miRNA_hsa-mir-1229	CTCTCACCACTGCCCTCCCACGG
1842	hsa-mir-769_1842	miRNA_hsa-mir-769	GAGACCTCTGGGTTCTGAGCTG
1843	RP11-91K11.3-001_1843	protein_coding_RP11-91K11.3-001	AATGTAGTTGCCACTAGGAG
1844	hsa-mir-15b_1844	miRNA_hsa-mir-15b	GAATCATTATTTGCTGCTCTG
1845	RP11-148K1.5-004_1845	protein_coding_RP11-148K1.5-004	GCTGACGAGCGGGAGGCCCTCA
1846	ENST00000624339.1_1846	other_TMapped_ENST00000624339.1	GACATGCTCAGGATTGACAG
1847	CTSV-203_1847	protein_coding_CTSV-203	AATTTCAAATCTGTCAGAAATG
1848	RNY4P18-201_1848	YRNA_RNY4P18-201	GCTAAATTTGACTGGCTTA
1849	ENST00000563403.1_1849	other_TMapped_ENST00000563403.1	CACAGGAAAATTCGGGATCCCGT
1850	hsa-mir-6852_1850	miRNA_hsa-mir-6852	TGCCCTGGGGTTCTGAGGACATGA
1851	ENST00000587908.1_1851	other_TMapped_ENST00000587908.1	AAATAAGGAAGGGTGTCTGG
1852	ENST00000604760.1_1852	other_TMapped_ENST00000604760.1	GCAACGGCGCGACCTCTACTC
1853	hsa-mir-7849_1853	miRNA_hsa-mir-7849	TTGTTGATCTTGGGCCTGATGA
1854	hsa-let-7b_1854	miRNA_hsa-let-7b	TGAGGAAGTAGGTTGTGTGGTT
1855	RNY4P7-201_1855	YRNA_RNY4P7-201	CGCTGGTCCGATGGTAGTGGGTTATTAGAACT
1856	ENST00000484882.1_1856	other_TMapped_ENST00000484882.1	CTGTCTCCACGGGGGACCCG
1857	hsa-mir-3605_1857	miRNA_hsa-mir-3605	CCTCCGTGTTACCTGCCCTCT
1858	AC106782.9-001_1858	protein_coding_AC106782.9-001	ACCATACGGGGCCGGACCCGA
1859	ENST00000387347.2_1859	other_TMapped_ENST00000387347.2	ATAAGGAAAGGTTAAAAAAAGTAAAAGGAACTCG
1860	RNY4P10-201_1860	YRNA_RNY4P10-201	GCTGGTCCGATGGTAGTGGGTTATCAGCACTTAAA
1861	hsa-mir-221_1861	miRNA_hsa-mir-221	AGCTACATTGTCTGCTGGNTTTC
1862	hsa-mir-12136_1862	miRNA_hsa-mir-12136	AAAAAGTCATGGAGGCCATGGGGTTGAAAA
1863	hsa_piR_018570|gb|DQ595536|Homo_sapiens_1863	piRNA_hsa_piR_018570|gb|DQ595536|Homo_sapiens	AGTGGCAGAATTCTCGCCTGCC
1864	hsa_piR_017716|gb|DQ594453|Homo_sapiens_1864	piRNA_hsa_piR_017716|gb|DQ594453|Homo_sapiens	TCCCTGGTGGCCTAGTGGTTAGG
1865	AC138655.2-005_1865	protein_coding_AC138655.2-005	TTCGAATCCTGCTACCCCAGCC
1866	AC018731.1-001_1866	protein_coding_AC018731.1-001	TAATCCCACTTCTGACACCA
1867	tRNA-Gly-CCC-1-2_1867	tRNA_tRNA-Gly-CCC-1-2	CCCGGGTTCAATTCTCGGCG
1868	RP11-705O3.2-014_1868	protein_coding_RP11-705O3.2-014	AATGAAAAAGAATAAGGGA
1869	RNY4P10-201_1869	YRNA_RNY4P10-201	GGCTGGTCCGATGGTGGTGGGTTATCAGAACAAA
1870	ENST00000410577.1_1870	other_TMapped_ENST00000410577.1	CTTCTAACTACTGCACTTGACTAGTCTA
1871	ENST00000410344.1_1871	other_TMapped_ENST00000410344.1	TTAAATGGATTTTTGGAGCAGGGAGATG
1872	RP11-806J18.2-001_1872	protein_coding_RP11-806J18.2-001	CGTCTCTCTCCCCCGCGCCAGA
1873	hsa-mir-194-1_1873	miRNA_hsa-mir-194-1	TGTAACAGCAACTCCATGTGGAATTT
1874	hsa-mir-21_1874	miRNA_hsa-mir-21	CTGGCTTATCAGACTGATGTTGAC
1875	ENST00000363214.1_1875	other_TMapped_ENST00000363214.1	GAATCGCTGTACGGCCTTGATGAAAGC
1876	hsa-mir-151a_1876	miRNA_hsa-mir-151a	ACAAGACTGAAGCTCCTTGAGG
1877	tRNA-Glu-TTC-2-1_1877	tRNA_tRNA-Glu-TTC-2-1	CGGTTCGGATTCCTGGTTTTC
1878	ENST00000471086.3_1878	other_TMapped_ENST00000471086.3	TCCCGGGAGCGGGGGACCACCAGG
1879	RNY4P7-201_1879	YRNA_RNY4P7-201	AGCGGCTGGTCCGATGGTAGTGGGGTATCAGAAC
1880	hsa-mir-1260b_1880	miRNA_hsa-mir-1260b	ATCCCACCACTGCCACCAAAAA
1881	hsa-mir-30d_1881	miRNA_hsa-mir-30d	GTAAACATCCCCGACTGGAAACT
1882	RNY4-201_1882	YRNA_RNY4-201	CCCCCACTGCTAAATTTGACTGGCTTCTAT
1883	ENST00000364409.1_1883	other_TMapped_ENST00000364409.1	TCCCCCCACTGCTAAATTTGACCGGCTA
1884	MT-ND1-201_1884	protein_coding_MT-ND1-201	AACTACGCCCTGATCGGCGCAA
1885	RNY4P23-201_1885	YRNA_RNY4P23-201	CTGCTAAATTTGACTGGCTTTCT
1886	hsa-mir-107_1886	miRNA_hsa-mir-107	AGCAGCATTGTACAGGGCTATCT
1887	hsa-mir-486-2_1887	miRNA_hsa-mir-486-2	TCCTGTACTGAGCTGCCTCG
1888	ENST00000402221.4_1888	other_TMapped_ENST00000402221.4	TCCTGGGGCTGCAGCAGG
1889	RNY1P12-201_1889	YRNA_RNY1P12-201	CCTTCTCACTACTGCACTTGACTAGTATT
1890	RP11-271K21.3-001_1890	protein_coding_RP11-271K21.3-001	TGTTCTCGGCCGTCCCACTTT
1891	ENST00000384181.1_1891	other_TMapped_ENST00000384181.1	ACTCCGGATGTGCTGACCCCTGCGA
1892	IKZF5-205_1892	protein_coding_IKZF5-205	AGGACTTTTACTTTGAAAAAA
1893	hsa-mir-877_1893	miRNA_hsa-mir-877	GTAGAGGAGATGGCGCCGGGGT
1894	ENST00000387392.1_1894	other_TMapped_ENST00000387392.1	AAGGACTGCAAAACCCCACTCTGCATCCACT
1895	hsa-mir-29a_1895	miRNA_hsa-mir-29a	AAATAGCACCATCTGAAATCGGTTA
1896	RNY4P10-201_1896	YRNA_RNY4P10-201	GGCTGGTCCGATGGCAGTGGGTTATCAGAACTTTA
1897	ENST00000389680.2_1897	other_TMapped_ENST00000389680.2	AAGACCCAAACTGGGATTA
1898	ENST00000496058.1_1898	other_TMapped_ENST00000496058.1	ACTCCCATTCCCTTCCGCCAC
1899	hsa-mir-520a_1899	miRNA_hsa-mir-520a	AAAGTGCTTCCCTTTGGACTG
1900	hsa-mir-16-2_1900	miRNA_hsa-mir-16-2	ACAGCAGCACGTAAATATTGGCG
1901	ENST00000387347.2_1901	other_TMapped_ENST00000387347.2	GTAAATGATATCATCTCAACCTAGTATTAA
1902	hsa_piR_014620|gb|DQ590013|Homo_sapiens_1902	piRNA_hsa_piR_014620|gb|DQ590013|Homo_sapiens	TCGTGGTTGTAGTCCGTGA
1903	hsa-mir-450a-2_1903	miRNA_hsa-mir-450a-2	TTTTGCGATGTGTTCCTAATATT
1904	hsa-mir-146a_1904	miRNA_hsa-mir-146a	TGAGAACTGAATTCCATGGTTTGA
1905	tRNA-Gly-GCC-2-6_1905	tRNA_tRNA-Gly-GCC-2-6	TCGATTCCCGGCCAATGAACCA
1906	RP11-588H23.2-013_1906	protein_coding_RP11-588H23.2-013	GGTAGAATTGGGCTGTGAATCCATCTG
1907	ENST00000445125.2_1907	other_TMapped_ENST00000445125.2	TAGTTGGTGGAGTGATTTGTTTGCTT
1908	THBS2-206_1908	protein_coding_THBS2-206	GCCTTTCTGACTCGGCCCG
1909	AC013472.2-003_1909	protein_coding_AC013472.2-003	TCTTGGATTTGTTGAAGACA
1910	AC073046.11-009_1910	protein_coding_AC073046.11-009	ATGAGGGGCGAGTCGAGGTGCA
1911	AC079927.1-002_1911	protein_coding_AC079927.1-002	GTATGTGAAATTGTTGCAAGGG
1912	ENST00000384446.1_1912	other_TMapped_ENST00000384446.1	AGGGCGAGGCTTATCCATTG
1913	RNY4P18-201_1913	YRNA_RNY4P18-201	TGTCCCCCCCACTGCTAAATTTGACTGGCTT
1914	AC016692.2-004_1914	protein_coding_AC016692.2-004	AGGACGGGAGGCAAGAAGGGA
1915	AC053503.3-015_1915	protein_coding_AC053503.3-015	GCCCCAGTGGAACCACCATT
1916	ENST00000387372.1_1916	other_TMapped_ENST00000387372.1	TAGGATGGGGTGTGATGGGA
1917	hsa-mir-140_1917	miRNA_hsa-mir-140	TACCACAGGGTAGAACCCCGGACTA
1918	hsa-mir-496_1918	miRNA_hsa-mir-496	GTATTACATGGCCAATCTCC
1919	hsa-mir-487b_1919	miRNA_hsa-mir-487b	TCGTGCAGGGTCATCCACTTTTT
1920	ENST00000387449.1_1920	other_TMapped_ENST00000387449.1	ACTCATGCCCCCATGTCTAACAACATGGC
1921	AC104389.17-001_1921	protein_coding_AC104389.17-001	AAAGTGGTGGCTGGTGTGGCTAATGCCCTGG
1922	hsa-mir-1307_1922	miRNA_hsa-mir-1307	CTCGGCGTGGCGTCGGTCGGGT
1923	tRNA-Glu-CTC-1-1_1923	tRNA_tRNA-Glu-CTC-1-1	TCCCTGGTGCTCTAGTGGTTAGGATTCGGCGCTC
1924	hsa-mir-3184_1924	miRNA_hsa-mir-3184	AGNTCGGTCTGAGGCCCCTCAGT
1925	RNY4P20-201_1925	YRNA_RNY4P20-201	GGCTGGTCCGATGGTAGTAGGTTATCAGAAA
1926	hsa-mir-17_1926	miRNA_hsa-mir-17	TCAAAGTACTTACAGTGCAGGTAG
1927	ENST00000387377.1_1927	other_TMapped_ENST00000387377.1	AGTAAGGTCAGCTAAATAAGCTATCGTGCC
1928	RNY4-201_1928	YRNA_RNY4-201	ACTGCTAAATTTGACTGGCTCTT
1929	hsa-mir-21_1929	miRNA_hsa-mir-21	TATCTTATCAGACTGATGTT
1930	RNY4P24-201_1930	YRNA_RNY4P24-201	CTACTAAATTTGACTGGTTT
1931	ENST00000482659.2_1931	other_TMapped_ENST00000482659.2	TTCAATGAACCGGAACTGGG
1932	WBP1L-202_1932	protein_coding_WBP1L-202	AACTTCACCGGTGGGCAGGCAAT
1933	hsa_piR_016659|gb|DQ592932|Homo_sapiens_1933	piRNA_hsa_piR_016659|gb|DQ592932|Homo_sapiens	CCCCCACTGCTAAATATGACTGGTTT
1934	hsa-mir-576_1934	miRNA_hsa-mir-576	ATTCTAATTTCTCCACGTCTATG
1935	RNY4-201_1935	YRNA_RNY4-201	TACAACCCCCCACTGCTAAATTTGACCGGCTTCT
1936	hsa-mir-641_1936	miRNA_hsa-mir-641	AGGTGACTGTCCTATGTCTTT
1937	tRNA-Cys-GCA-4-1_1937	tRNA_tRNA-Cys-GCA-4-1	AGCTCAGTGGTAGAGCATTCGACTGCA
1938	hsa-mir-25_1938	miRNA_hsa-mir-25	NATTGCACTTGTCTCGGTCT
1939	hsa-mir-505_1939	miRNA_hsa-mir-505	CGTCAACACTTGCTGGTTCC
1940	hsa-mir-1233-2_1940	miRNA_hsa-mir-1233-2	AGTGGGAGGCCAGGGCACGG
1941	tRNA-Ile-TAT-1-1_1941	tRNA_tRNA-Ile-TAT-1-1	TGACAGTGCGAGCGGAGC
1942	RP11-424M22.2-020_1942	protein_coding_RP11-424M22.2-020	AACACTCAACTCTGAACTGG
1943	hsa-mir-342_1943	miRNA_hsa-mir-342	AGGGGTGCTATCTGTGATTGAGGTTTT
1944	RNY4P17-201_1944	YRNA_RNY4P17-201	GATGGTAGCGGGTTATCAGAA
1945	ENST00000491814.1_1945	other_TMapped_ENST00000491814.1	TCGCAAGGGAGTGGAGGTTCA
1946	hsa-mir-140_1946	miRNA_hsa-mir-140	ACCACAGGGTAGAACCACGACT
1947	RP11-68C8.3-001_1947	protein_coding_RP11-68C8.3-001	AACTCGGCAAATCTTACCCCG
1948	RNY4P20-201_1948	YRNA_RNY4P20-201	GGCTGGTCCGATGGTAGTGGGTTATCAGAAATG
1949	hsa-mir-128-1_1949	miRNA_hsa-mir-128-1	TCACAGTGAACCGGTCACTTTT
1950	ENST00000365241.1_1950	other_TMapped_ENST00000365241.1	GACCCGCGGGTGCTTTCCAGCTCTTCT
1951	tRNA-Val-TAC-4-1_1951	tRNA_tRNA-Val-TAC-4-1	CCGTGGTGTAGTGGTTATCACATTC
1952	AC023906.1-001_1952	protein_coding_AC023906.1-001	TGCGTAAGAACTTACCTTTTGGC
1953	RNY4P7-201_1953	YRNA_RNY4P7-201	CCCAACTGCTAAATTTGACTGGCTA
1954	hsa-mir-412_1954	miRNA_hsa-mir-412	TACTTCACCTGGTCCACTGGC
1955	hsa-mir-142_1955	miRNA_hsa-mir-142	CTAGTGTTTCCTACTTTATGGA
1956	hsa_piR_004880|gb|DQ576715|Homo_sapiens_1956	piRNA_hsa_piR_004880|gb|DQ576715|Homo_sapiens	AAAGTAGGACATCATCAGGCT
1957	ENST00000631292.1_1957	other_TMapped_ENST00000631292.1	AGGGAGAGAACGCGGTCTGAGTGGG
1958	RNY4P37-201_1958	YRNA_RNY4P37-201	TACTGCTAAATTTGACTGGCTT
1959	ENST00000536625.1_1959	other_TMapped_ENST00000536625.1	TGTATTTATTAGATAAAAAACC
1960	hsa-mir-142_1960	miRNA_hsa-mir-142	TGTAGTGTTTCCTACTTTATGGTG
1961	RNY4P10-201_1961	YRNA_RNY4P10-201	TGGTCCGATGGTAGTGGGTTATCAGAANT
1962	ENST00000516851.1_1962	other_TMapped_ENST00000516851.1	CCACTCCCGCTGCTTCACTTGACTAGTTT
1963	RNY4P10-201_1963	YRNA_RNY4P10-201	GGCTGGTCCGATGGTAGTGGGATATCAGGAAT
1964	hsa-mir-486-2_1964	miRNA_hsa-mir-486-2	CCTGTACTGAGCTGCCCCGAGTTTC
1965	hsa-mir-223_1965	miRNA_hsa-mir-223	TGTCAGTTTGTCAAATACCTCAAG
1966	ENST00000418524.6_1966	other_TMapped_ENST00000418524.6	CTGTTGTTTTCTTCTCTTTCA
1967	ENST00000496738.5_1967	other_TMapped_ENST00000496738.5	CGTCAGTGGGAGCCCTGGGAAG
1968	RNY4P10-201_1968	YRNA_RNY4P10-201	GGCTGGTCCGNTGGTAGTGGGTTATCATAAC
1969	hsa-mir-339_1969	miRNA_hsa-mir-339	AGCGCCTCGACGACAGAGCCGTG
1970	RP11-203L2.5-001_1970	protein_coding_RP11-203L2.5-001	ATCGGGCGGGAGCCCGGCGG
1971	MT-ND5-201_1971	protein_coding_MT-ND5-201	GAATAGGCTTCCGGCTGCCAGGCGT
1972	ENST00000387400.1_1972	other_TMapped_ENST00000387400.1	ACTAAGTGTTTGTGGGTTACA
1973	tRNA-Glu-TTC-2-1_1973	tRNA_tRNA-Glu-TTC-2-1	CCGGCGGCCCGGGTTCGACTCCCGGTGTGGGAACC
1974	hsa-mir-3620_1974	miRNA_hsa-mir-3620	CCTCACCCTGCATCCCGCACCCAG
1975	ENST00000364535.1_1975	other_TMapped_ENST00000364535.1	GGTCCGATGGTAGTGGGTTCCCA
1976	tRNA-Val-TAC-2-1_1976	tRNA_tRNA-Val-TAC-2-1	GTTCGAGCCCCAGTGGAACC
1977	AC013486.1-015_1977	protein_coding_AC013486.1-015	GTGGGAGATTGTGGATGCGCA
1978	ENST00000387342.1_1978	other_TMapped_ENST00000387342.1	CAACTTAACTTGACCGCTCTGACCC
1979	ENST00000437979.1_1979	other_TMapped_ENST00000437979.1	GTGTAGAATGAAGTCAGGGG
1980	ENST00000435568.1_1980	other_TMapped_ENST00000435568.1	TTCACCACCTTCTCCACCAGC
1981	hsa-mir-12136_1981	miRNA_hsa-mir-12136	GAAAAAGTCATGGAGGCCATGGCACC
1982	AC104802.2-003_1982	protein_coding_AC104802.2-003	AAAAAGGGAGTCAAAGGGCTAA
1983	hsa-let-7a-1_1983	miRNA_hsa-let-7a-1	TGAGGTTGTAGGTTGTATAGTTT
1984	ENST00000512423.1_1984	other_TMapped_ENST00000512423.1	TTTGGTCGGGATATTAAGCAGGG
1985	AC144568.1-003_1985	protein_coding_AC144568.1-003	GTGAGGAGGATGGTGTGGACA
1986	ENST00000479165.1_1986	other_TMapped_ENST00000479165.1	CTATAGCTCAGCTGGGAGAGC
1987	hsa_piR_015026|gb|DQ590548|Homo_sapiens_1987	piRNA_hsa_piR_015026|gb|DQ590548|Homo_sapiens	CATTGTGGTTCAGTGGTAGAATTCTCGCCT
1988	ENST00000471740.1_1988	other_TMapped_ENST00000471740.1	TTCATTCTTCTTTCCCCTTCAGA
1989	hsa-mir-190b_1989	miRNA_hsa-mir-190b	TGATATGTTTGATATTGGGCT
1990	RNY4P10-201_1990	YRNA_RNY4P10-201	GGCTGGTCCGNTGGTAGTGGGTTATCANG
1991	RP11-195F19.28-001_1991	protein_coding_RP11-195F19.28-001	TCAGTAGCTTGTCTGAGA
1992	SERPINB8-202_1992	protein_coding_SERPINB8-202	ACGCTCATCAGGCACCACAAAA
1993	hsa-mir-486-2_1993	miRNA_hsa-mir-486-2	TCCTGTACTGAGCTGCCCCAAGGA
1994	hsa_piR_019949|gb|DQ597397|Homo_sapiens_1994	piRNA_hsa_piR_019949|gb|DQ597397|Homo_sapiens	GGTAGCTCAGTTGGTAGAGCA
1995	tRNA-Glu-TTC-14-1_1995	tRNA_tRNA-Glu-TTC-14-1	TCCCTGATGGTCTAGTGGCTAGGATTCGGCGCT
1996	RNY4-201_1996	YRNA_RNY4-201	TACAACCCCCCACTGCTAATA
1997	RP11-89F17.2-001_1997	protein_coding_RP11-89F17.2-001	ATGAGGAGGATGAGGAGGATGT
1998	AC005393.3-006_1998	protein_coding_AC005393.3-006	TTCTGGTGGCGCTGCGCTTGGG
1999	hsa-mir-10b_1999	miRNA_hsa-mir-10b	ACCATGTAGAACCGAATTTGT
[truncated: 387,488 more rows]
