# Supplementary material for: Small RNA Changes in Plasma Have Potential for Early Diagnosis of Alzheimer’s Disease before Symptom Onset
Source: Cells. 2024 Jan 23;13(3):207. doi: 10.3390/cells13030207 (PMC10854972; doi:10.3390/cells13030207)
Supplement: Supplementary file 1 [file cells-13-00207-s001.zip › Supplemental table S3 EV-enriched vs EV-depleted fraction of reads.xlsx]

## Sheet: Sheet1
EV- enriched plasma fraction				EV-depleted plama fraction
biotype	gene	average read count	percentage of total reads	biotype	gene	average read count	percentage of total reads
YRNA	RNY4P10-201	1.97114e+06	35.928	miRNA	hsa-mir-486-2	755848	33.0265
YRNA	RNY4P20-201	613045	11.174	YRNA	RNY4P10-201	320485	14.0035
YRNA	RNY4P18-201	325465	5.93225	miRNA	hsa-mir-92a-1	135006	5.89903
miRNA	hsa-mir-486-2	287992	5.24922	miRNA	hsa-mir-320a	121859	5.32457
YRNA	RNY4P7-201	166506	3.03489	miRNA	hsa-let-7b	108808	4.75431
YRNA	RNY4-201	166095	3.02741	miRNA	hsa-mir-16-1	59716.3	2.60928
miRNA	hsa-let-7a-1	116841	2.12966	miRNA	hsa-mir-21	50512.2	2.20711
miRNA	hsa-mir-16-1	111293	2.02854	miRNA	hsa-mir-223	42225.9	1.84505
miRNA	hsa-mir-26a-2	106745	1.94563	YRNA	RNY4P20-201	38320.7	1.67441
miRNA	hsa-mir-21	98066.3	1.78745	miRNA	hsa-mir-451b	38203.2	1.66927
miRNA	hsa-let-7f-2	97156.9	1.77088	miRNA	hsa-mir-26a-2	31309.5	1.36805
miRNA	hsa-mir-223	92852.7	1.69243	miRNA	hsa-mir-25	30356	1.3264
miRNA	hsa-let-7b	75443.5	1.37511	miRNA	hsa-mir-3184	28205.2	1.23242
miRNA	hsa-mir-92a-1	67747.4	1.23483	miRNA	hsa-let-7a-1	22141.8	0.967476
miRNA	hsa-mir-126	61161	1.11478	YRNA	RNY4P18-201	22124.6	0.966728
miRNA	hsa-mir-320a	57308.5	1.04456	miRNA	hsa-mir-30d	21853.9	0.954898
miRNA	hsa-mir-30d	55249.9	1.00704	miRNA	hsa-mir-122b	19596.2	0.856249
miRNA	hsa-mir-451b	54142.8	0.986861	miRNA	hsa-mir-146a	17475	0.763565
miRNA	hsa-mir-26b	46824.4	0.853467	miRNA	hsa-mir-199a-1	16313.6	0.712817
YRNA	RNY4P27-201	41063.9	0.748471	miRNA	hsa-let-7f-2	15894.4	0.6945
miRNA	hsa-let-7g	40597.5	0.73997	miRNA	hsa-mir-126	15770.5	0.689084
miRNA	hsa-mir-25	35701.6	0.650733	YRNA	RNY4-201	15207.3	0.664478
miRNA	hsa-let-7i	31799.4	0.579607	miRNA	hsa-let-7i	14338.2	0.626502
miRNA	hsa-mir-146a	25499	0.46477	miRNA	hsa-let-7g	14233	0.621907
miRNA	hsa-mir-425	24332.2	0.443502	miRNA	hsa-mir-26b	13914.5	0.607991
miRNA	hsa-mir-3184	23054.8	0.420219	miRNA	hsa-let-7d	13128.2	0.57363
miRNA	hsa-mir-24-2	22703.1	0.413809	miRNA	hsa-mir-93	12700.5	0.554945
miRNA	hsa-mir-151a	22318.3	0.406795	YRNA	RNY4P7-201	12229.9	0.534379
miRNA	hsa-mir-199a-1	21269.3	0.387676	miRNA	hsa-mir-24-2	11118.9	0.485834
tRNA	tRNA-Glu-CTC-1-7	21047.9	0.38364	miRNA	hsa-mir-425	9730.5	0.425171
miRNA	hsa-let-7d	20805.3	0.379219	miRNA	hsa-mir-101-1	8999.21	0.393217
miRNA	hsa-mir-181a-2	20268.7	0.369438	miRNA	hsa-mir-181a-2	8890.95	0.388487
miRNA	hsa-mir-221	17236.1	0.314163	miRNA	hsa-mir-30e	6806.76	0.297419
miRNA	hsa-mir-150	13758.9	0.250783	miRNA	hsa-mir-4433a	6386.62	0.279061
YRNA	RNY1-201	13043.9	0.237752	miRNA	hsa-mir-221	6151.17	0.268773
miRNA	hsa-mir-93	11897	0.216846	miRNA	hsa-mir-151a	6007.6	0.2625
miRNA	hsa-mir-30e	11774.4	0.214611	miRNA	hsa-mir-16-2	5886.76	0.25722
miRNA	hsa-mir-103b-1	11132.2	0.202907	miRNA	hsa-mir-106b	5457.24	0.238452
miRNA	hsa-mir-30c-2	11089.8	0.202133	miRNA	hsa-mir-103b-1	5365.67	0.234451
tRNA	tRNA-Gly-GCC-5-1	10640.5	0.193945	YRNA	RNY4P27-201	5038.48	0.220154
piRNA	hsa_piR_020326|gb|DQ597916|Homo_sapiens	10241.5	0.186671	miRNA	hsa-mir-28	4992.07	0.218127
YRNA	RNY3-201	9458.76	0.172405	miRNA	hsa-mir-143	4747.02	0.207419
miRNA	hsa-mir-140	9304.71	0.169597	miRNA	hsa-mir-140	4047.74	0.176864
YRNA	RNY4P23-201	8984.07	0.163753	miRNA	hsa-mir-15b	3716.21	0.162379
miRNA	hsa-mir-186	8950.55	0.163142	miRNA	hsa-mir-484	3411.31	0.149056
miRNA	hsa-mir-143	8657.88	0.157807	miRNA	hsa-mir-186	3384.05	0.147865
other_TMapped	ENST00000387342.1	8255.19	0.150467	piRNA	hsa_piR_020326|gb|DQ597916|Homo_sapiens	3167.38	0.138398
miRNA	hsa-mir-98	7614.71	0.138793	tRNA	tRNA-Glu-CTC-1-7	3138.67	0.137143
miRNA	hsa-mir-28	7357.29	0.134101	miRNA	hsa-mir-22	3130.4	0.136782
miRNA	hsa-mir-10b	7322.19	0.133461	YRNA	RNY1-201	3075.57	0.134386
miRNA	hsa-mir-15b	7310.29	0.133244	miRNA	hsa-mir-432	2849.95	0.124528
miRNA	hsa-mir-142	7291.05	0.132894	miRNA	hsa-mir-98	2778.17	0.121391
YRNA	RNY4P16-201	7059.79	0.128679	miRNA	hsa-mir-378a	2764.74	0.120804
miRNA	hsa-mir-484	6836.86	0.124615	miRNA	hsa-mir-10b	2754.38	0.120352
miRNA	hsa-mir-374c	6424.95	0.117108	piRNA	hsa_piR_017723|gb|DQ594464|Homo_sapiens	2718.93	0.118803
miRNA	hsa-mir-22	6321.14	0.115215	miRNA	hsa-mir-148a	2602.55	0.113717
protein_coding	RP3-481F12.6-001	6089.98	0.111002	miRNA	hsa-mir-375	2530.24	0.110558
miRNA	hsa-mir-222	5832.48	0.106308	other_TMapped	ENST00000410794.1	2487.48	0.108689
miRNA	hsa-mir-101-1	5346.1	0.0974432	miRNA	hsa-mir-328	2313.33	0.10108
miRNA	hsa-mir-146b	5264.81	0.0959616	miRNA	hsa-mir-409	2246.4	0.0981558
miRNA	hsa-mir-30a	5091.98	0.0928114	miRNA	hsa-mir-128-1	2245.69	0.0981246
miRNA	hsa-mir-29a	4958.69	0.090382	miRNA	hsa-mir-30a	2157.29	0.0942618
miRNA	hsa-mir-106b	4882.93	0.0890011	miRNA	hsa-mir-15a	2030.05	0.0887022
miRNA	hsa-mir-27b	4787.31	0.0872582	miRNA	hsa-mir-146b	2005	0.0876077
tRNA	tRNA-Gly-GCC-1-5	4742.86	0.086448	miRNA	hsa-let-7c	2002.4	0.0874943
piRNA	hsa_piR_016659|gb|DQ592932|Homo_sapiens	4691.55	0.0855128	miRNA	hsa-mir-20a	1894.21	0.082767
miRNA	hsa-mir-23a	3989.62	0.0727187	miRNA	hsa-mir-382	1792.67	0.0783299
miRNA	hsa-let-7e	3924.02	0.0715231	other_TMapped	ENST00000416946.1	1778.43	0.0777078
miRNA	hsa-mir-4433a	3921.67	0.0714802	miRNA	hsa-mir-744	1752.52	0.0765759
other_TMapped	ENST00000387459.1	3907.71	0.0712259	miRNA	hsa-mir-1307	1741.95	0.076114
miRNA	hsa-mir-16-2	3904.36	0.0711647	miRNA	hsa-mir-27b	1714.12	0.0748978
miRNA	hsa-mir-191	3839.14	0.069976	miRNA	hsa-mir-320c-1	1667.45	0.0728587
protein_coding	RP11-846F4.3-001	3838.86	0.0699708	protein_coding	RP11-752G15.5-002	1645.14	0.0718839
miRNA	hsa-mir-125a	3785.93	0.0690061	miRNA	hsa-mir-181b-2	1583.21	0.069178
miRNA	hsa-mir-409	3673.24	0.0669521	miRNA	hsa-mir-92a-2	1532.24	0.0669506
miRNA	hsa-mir-12136	3639.17	0.066331	miRNA	hsa-mir-29a	1521.57	0.0664845
miRNA	hsa-mir-148a	3472.4	0.0632915	miRNA	hsa-mir-185	1444.14	0.0631013
miRNA	hsa-mir-1307	3291.55	0.059995	miRNA	hsa-mir-191	1444	0.063095
miRNA	hsa-mir-374a	3249.36	0.059226	miRNA	hsa-mir-4446	1416.71	0.0619028
miRNA	hsa-mir-652	3093.62	0.0563874	miRNA	hsa-mir-584	1399.29	0.0611413
other_TMapped	ENST00000387347.2	3053.74	0.0556604	YRNA	RNY4P16-201	1348.02	0.0589014
miRNA	hsa-mir-744	3040.02	0.0554105	miRNA	hsa-mir-19b-2	1325.19	0.0579037
miRNA	hsa-mir-181b-2	3017.88	0.0550069	miRNA	hsa-mir-483	1300.93	0.0568436
miRNA	hsa-mir-432	3003.38	0.0547426	piRNA	hsa_piR_018569|gb|DQ595533|Homo_sapiens	1296.57	0.0566532
other_TMapped	ENST00000387460.2	2946.24	0.053701	miRNA	hsa-mir-17	1265.93	0.0553143
piRNA	hsa_piR_018569|gb|DQ595533|Homo_sapiens	2931.98	0.0534411	miRNA	hsa-mir-652	1237.64	0.0540783
miRNA	hsa-mir-328	2779.69	0.0506654	miRNA	hsa-mir-23a	1232.24	0.0538422
miRNA	hsa-mir-185	2720.64	0.0495891	miRNA	hsa-mir-340	1225.48	0.0535467
miRNA	hsa-mir-128-1	2720.1	0.0495791	miRNA	hsa-mir-574	1208.19	0.0527914
YRNA	RNY4P17-201	2712.95	0.049449	miRNA	hsa-mir-3615	1194.19	0.0521797
miRNA	hsa-mir-378a	2704.81	0.0493005	other_TMapped	ENST00000445125.2	1182.05	0.0516491
miRNA	hsa-mir-30b	2582.86	0.0470777	miRNA	hsa-mir-182	1119.24	0.0489047
miRNA	hsa-mir-369	2498.64	0.0455427	miRNA	hsa-mir-369	1073.81	0.0469197
miRNA	hsa-mir-335	2491.81	0.0454182	miRNA	hsa-mir-485	1036.79	0.045302
YRNA	RNY4P3-201	2470.57	0.0450311	miRNA	hsa-mir-361	969.238	0.0423505
miRNA	hsa-mir-148b	2464.43	0.0449191	miRNA	hsa-mir-150	924.048	0.0403759
miRNA	hsa-mir-15a	2401.55	0.043773	miRNA	hsa-mir-1306	911.833	0.0398422
miRNA	hsa-let-7c	2358.9	0.0429957	piRNA	hsa_piR_016677|gb|DQ592953|Homo_sapiens	890.19	0.0388965
other_TMapped	ENST00000364535.1	2356.9	0.0429593	miRNA	hsa-mir-532	869.738	0.0380029
miRNA	hsa-mir-342	2337.79	0.0426108	miRNA	hsa-mir-130b	863.31	0.037722
other_TMapped	ENST00000416946.1	2313.83	0.0421742	miRNA	hsa-mir-148b	861.071	0.0376242
miRNA	hsa-mir-584	2293.79	0.0418088	miRNA	hsa-mir-152	859.452	0.0375534
other_TMapped	ENST00000387377.1	2292.6	0.0417871	miRNA	hsa-mir-374c	854.048	0.0373173
miRNA	hsa-mir-10a	2286.33	0.041673	miRNA	hsa-mir-10a	853.857	0.037309
miRNA	hsa-mir-155	2271.14	0.0413961	miRNA	hsa-mir-335	833.738	0.0364299
miRNA	hsa-mir-152	2263.79	0.041262	miRNA	hsa-mir-320b-1	828.024	0.0361802
tRNA	tRNA-Glu-CTC-1-1	2228.55	0.0406197	piRNA	hsa_piR_017716|gb|DQ594453|Homo_sapiens	825.143	0.0360543
miRNA	hsa-mir-340	2224.98	0.0405546	miRNA	hsa-mir-134	799.381	0.0349287
miRNA	hsa-mir-17	2161.29	0.0393937	tRNA	tRNA-Gly-GCC-1-5	789.881	0.0345136
protein_coding	RP11-752G15.5-002	2152.45	0.0392327	miRNA	hsa-mir-7-1	788.071	0.0344345
miRNA	hsa-mir-27a	2128.86	0.0388027	miRNA	hsa-mir-142	775.595	0.0338893
miRNA	hsa-mir-20a	2079.9	0.0379104	miRNA	hsa-mir-543	757.095	0.033081
YRNA	RNY4P24-201	2005.02	0.0365455	YRNA	RNY4P23-201	748.69	0.0327137
piRNA	hsa_piR_020009|gb|DQ597484|Homo_sapiens	1953.86	0.0356129	miRNA	hsa-let-7e	705.167	0.030812
piRNA	hsa_piR_009295|gb|DQ582567|Homo_sapiens	1913.57	0.0348786	other_TMapped	ENST00000462349.5	674.357	0.0294658
miRNA	hsa-mir-382	1900.21	0.0346352	miRNA	hsa-mir-197	640.119	0.0279698
miRNA	hsa-mir-361	1841.45	0.0335641	miRNA	hsa-mir-222	634.095	0.0277066
other_TMapped	ENST00000445125.2	1840.62	0.0335489	miRNA	hsa-mir-342	629.095	0.0274881
miRNA	hsa-mir-654	1721.12	0.0313708	miRNA	hsa-mir-92b	616.381	0.0269325
miRNA	hsa-mir-487b	1712.79	0.0312189	miRNA	hsa-mir-144	596.81	0.0260774
miRNA	hsa-mir-99b	1645.14	0.029986	miRNA	hsa-mir-101-2	593.238	0.0259213
miRNA	hsa-mir-339	1594.88	0.0290699	miRNA	hsa-mir-487b	590.19	0.0257882
YRNA	RNY4P14-201	1516.86	0.0276477	other_TMapped	ENST00000387342.1	588.548	0.0257164
other_TMapped	ENST00000387441.1	1512.79	0.0275735	miRNA	hsa-mir-942	585.476	0.0255822
miRNA	hsa-mir-3615	1453.21	0.0264877	miRNA	hsa-mir-1249	570.833	0.0249423
miRNA	hsa-mir-122b	1442.71	0.0262963	miRNA	hsa-mir-330	570.333	0.0249205
miRNA	hsa-mir-574	1418	0.0258459	miRNA	hsa-mir-576	566.714	0.0247624
miRNA	hsa-mir-130b	1408.76	0.0256775	miRNA	hsa-mir-99b	561.929	0.0245533
YRNA	RNY3P2-201	1392.76	0.0253859	miRNA	hsa-mir-30c-2	557.238	0.0243483
other_TMapped	ENST00000387400.1	1348.26	0.0245748	miRNA	hsa-mir-155	549.905	0.0240279
other_TMapped	ENST00000365068.1	1321.86	0.0240935	miRNA	hsa-mir-654	549.31	0.0240019
tRNA	tRNA-Glu-TTC-2-2	1299.17	0.0236799	miRNA	hsa-mir-192	534.762	0.0233662
other_TMapped	ENST00000410717.1	1277.14	0.0232785	miRNA	hsa-mir-125a	533.929	0.0233298
other_TMapped	ENST00000387372.1	1268.81	0.0231266	miRNA	hsa-mir-29c	519.357	0.0226931
miRNA	hsa-mir-182	1267.55	0.0231036	miRNA	hsa-mir-421	514.071	0.0224622
miRNA	hsa-mir-19b-2	1265.93	0.0230741	miRNA	hsa-mir-493	469.119	0.020498
other_TMapped	ENST00000387449.1	1259.19	0.0229513	other_TMapped	ENST00000635935.1	467.429	0.0204241
miRNA	hsa-mir-29c	1244.17	0.0226774	miRNA	hsa-mir-379	467.31	0.0204189
miRNA	hsa-mir-197	1222.98	0.0222912	other_TMapped	ENST00000387459.1	453.571	0.0198186
other_TMapped	ENST00000516950.1	1222.81	0.0222881	miRNA	hsa-mir-877	449.833	0.0196553
miRNA	hsa-mir-379	1205.69	0.0219761	YRNA	RNY4P3-201	441.167	0.0192766
tRNA	tRNA-Val-CAC-4-1	1175.55	0.0214267	miRNA	hsa-mir-19a	433.786	0.0189541
miRNA	hsa-mir-485	1161.26	0.0211663	miRNA	hsa-mir-323b	433.333	0.0189343
miRNA	hsa-mir-532	1138.12	0.0207445	miRNA	hsa-mir-374a	400.238	0.0174883
miRNA	hsa-mir-134	1080.88	0.0197012	miRNA	hsa-mir-625	398.619	0.0174175
tRNA	tRNA-Pro-TGG-1-1	1074.86	0.0195914	miRNA	hsa-mir-30b	392.048	0.0171304
other_TMapped	ENST00000362330.2	1059.95	0.0193197	YRNA	RNY4P28-201	391.476	0.0171054
miRNA	hsa-mir-92a-2	1055.45	0.0192377	miRNA	hsa-mir-27a	391.143	0.0170908
miRNA	hsa-mir-23b	1038.07	0.0189209	other_TMapped	ENST00000540957.1	369.905	0.0161628
miRNA	hsa-mir-431	1037.31	0.018907	miRNA	hsa-mir-224	367.048	0.016038
miRNA	hsa-mir-493	1010.98	0.0184271	miRNA	hsa-mir-664a	365.048	0.0159506
YRNA	RNY4P28-201	998.833	0.0182057	YRNA	RNY4P17-201	363.762	0.0158944
protein_coding	RP11-215L17.2-001	989.048	0.0180274	tRNA	tRNA-Glu-CTC-1-1	352.952	0.0154221
miRNA	hsa-mir-324	961.952	0.0175335	tRNA	tRNA-Gly-GCC-5-1	348.667	0.0152349
piRNA	hsa_piR_016658|gb|DQ592931|Homo_sapiens	946.762	0.0172566	tRNA	tRNA-Val-CAC-4-1	335.976	0.0146804
miRNA	hsa-let-7a-3	884.929	0.0161296	protein_coding	CTD-2083E4.1-002	333.667	0.0145794
other_TMapped	ENST00000464816.1	878.952	0.0160207	miRNA	hsa-mir-1-2	333.5	0.0145722
YRNA	RNY4P9-201	821.476	0.014973	miRNA	hsa-mir-1908	331.952	0.0145045
other_TMapped	ENST00000389680.2	813.881	0.0148346	other_TMapped	ENST00000364535.1	328.595	0.0143578
miRNA	hsa-mir-144	803.357	0.0146428	tRNA	tRNA-Ser-GCT-6-1	322.119	0.0140749
other_TMapped	ENST00000363120.1	796.381	0.0145156	miRNA	hsa-mir-18a	316.738	0.0138398
piRNA	hsa_piR_016677|gb|DQ592953|Homo_sapiens	759.429	0.0138421	miRNA	hsa-mir-130a	311.19	0.0135974
other_TMapped	ENST00000410794.1	739.524	0.0134793	piRNA	hsa_piR_016659|gb|DQ592932|Homo_sapiens	305.81	0.0133622
miRNA	hsa-mir-543	738.238	0.0134559	miRNA	hsa-mir-433	299.786	0.013099
protein_coding	SMC1A-202	732.762	0.013356	piRNA	hsa_piR_019752|gb|DQ597110|Homo_sapiens	295.929	0.0129305
miRNA	hsa-mir-576	708.238	0.012909	other_TMapped	ENST00000554988.1	285.786	0.0124873
other_TMapped	ENST00000500358.6	703.929	0.0128305	miRNA	hsa-mir-324	285.738	0.0124852
miRNA	hsa-mir-4446	701.238	0.0127815	protein_coding	RP3-481F12.6-001	285.167	0.0124603
miRNA	hsa-mir-7-1	683.952	0.0124664	piRNA	hsa_piR_016745|gb|DQ593052|Homo_sapiens	284.69	0.0124394
miRNA	hsa-mir-421	673.786	0.0122811	miRNA	hsa-mir-1843	284.405	0.012427
miRNA	hsa-mir-323b	669.976	0.0122116	miRNA	hsa-mir-323a	279	0.0121908
miRNA	hsa-mir-505	668.81	0.0121904	miRNA	hsa-mir-660	277.5	0.0121253
protein_coding	RP11-317N8.1-001	668.048	0.0121765	miRNA	hsa-mir-139	263.762	0.011525
miRNA	hsa-mir-139	665.095	0.0121227	miRNA	hsa-mir-505	255.476	0.0111629
miRNA	hsa-mir-320c-1	630.119	0.0114852	tRNA	tRNA-Asp-GTC-3-1	254.548	0.0111224
miRNA	hsa-mir-326	630.048	0.0114839	miRNA	hsa-mir-431	253.643	0.0110828
miRNA	hsa-mir-942	588.69	0.0107301	YRNA	RNY4P14-201	253.095	0.0110589
miRNA	hsa-mir-664a	565.976	0.010316	other_TMapped	ENST00000365160.1	253.048	0.0110568
miRNA	hsa-mir-337	562.786	0.0102579	protein_coding	RP11-9F19.1-002	247.976	0.0108352
YRNA	RNY1P12-201	550.976	0.0100426	miRNA	hsa-mir-132	243.571	0.0106428
miRNA	hsa-mir-625	550.643	0.0100366	miRNA	hsa-mir-20b	235.214	0.0102776
other_TMapped	ENST00000631292.1	544.071	0.00991678	tRNA	tRNA-Glu-TTC-2-2	233.476	0.0102017
miRNA	hsa-mir-323a	538.476	0.0098148	YRNA	RNY3-201	223.143	0.00975014
miRNA	hsa-mir-330	532.833	0.00971195	miRNA	hsa-mir-424	222.833	0.00973662
other_TMapped	ENST00000515983.1	529.619	0.00965336	protein_coding	AC013437.1-001	218.786	0.00955976
miRNA	hsa-mir-92b	528.976	0.00964164	miRNA	hsa-mir-10527	212.929	0.00930383
miRNA	hsa-mir-454	520.548	0.00948802	miRNA	hsa-mir-181c	212.881	0.00930175
miRNA	hsa-mir-1306	512.786	0.00934654	miRNA	hsa-mir-320d-1	212.357	0.00927887
miRNA	hsa-mir-130a	506.714	0.00923588	miRNA	hsa-let-7a-3	210.024	0.00917691
protein_coding	RP11-694I15.3-003	498.929	0.00909397	other_TMapped	ENST00000387377.1	209.262	0.00914362
other_TMapped	ENST00000387421.1	495.119	0.00902453	miRNA	hsa-mir-181d	206.976	0.00904375
tRNA	tRNA-Gly-GCC-3-1	485.31	0.00884573	YRNA	RNY4P24-201	206.143	0.00900733
miRNA	hsa-mir-1249	473.024	0.0086218	miRNA	hsa-mir-629	197.238	0.00861824
tRNA	tRNA-Leu-TAG-1-1	468.881	0.00854629	miRNA	hsa-mir-194-1	192.714	0.00842058
miRNA	hsa-mir-181c	464.214	0.00846123	protein_coding	RP11-846F4.3-001	190.381	0.00831862
miRNA	hsa-mir-125b-1	458.381	0.0083549	miRNA	hsa-mir-12136	189.143	0.00826453
other_TMapped	ENST00000364409.1	456.071	0.00831281	other_TMapped	ENST00000500689.1	186.881	0.00816569
miRNA	hsa-mir-495	454.238	0.00827939	tRNA	tRNA-Pro-TGG-1-1	183.333	0.00801068
miRNA	hsa-mir-224	452.238	0.00824294	miRNA	hsa-mir-339	183.071	0.00799924
miRNA	hsa-let-7f-1	444.31	0.00809842	miRNA	hsa-mir-495	182.81	0.00798779
piRNA	hsa_piR_017723|gb|DQ594464|Homo_sapiens	443.738	0.00808801	piRNA	hsa_piR_004153|gb|DQ575660|Homo_sapiens	177.286	0.00774643
tRNA	tRNA-Gly-CCC-1-1	438.238	0.00798776	protein_coding	RP3-337O18.1-012	172.167	0.00752276
miRNA	hsa-mir-660	432.5	0.00788317	miRNA	hsa-mir-769	169	0.00738439
miRNA	hsa-mir-1843	430.143	0.00784021	miRNA	hsa-mir-210	167.905	0.00733654
protein_coding	RP11-68C8.3-001	425.714	0.00775949	miRNA	hsa-mir-145	163.905	0.00716176
tRNA	tRNA-Asp-GTC-3-1	422.5	0.0077009	other_TMapped	ENST00000387372.1	162.714	0.00710974
miRNA	hsa-mir-1908	417.667	0.00761281	other_TMapped	ENST00000365068.1	159.548	0.00697137
other_TMapped	ENST00000641545.1	415.667	0.00757635	protein_coding	RP11-203J14.1-001	158.333	0.00691832
other_TMapped	ENST00000362433.1	415.429	0.00757201	piRNA	hsa_piR_020388|gb|DQ598008|Homo_sapiens	156.69	0.00684653
piRNA	hsa_piR_017716|gb|DQ594453|Homo_sapiens	413.333	0.00753382	miRNA	hsa-mir-193a	155.548	0.00679659
tRNA	tRNA-Gly-CCC-2-2	412.357	0.00751603	other_TMapped	ENST00000387347.2	155.548	0.00679659
miRNA	hsa-mir-1-2	403.905	0.00736197	protein_coding	RP11-759M17.1-001	152.429	0.00666031
miRNA	hsa-mir-192	403.119	0.00734765	protein_coding	RP11-727F15.8-001	152.048	0.00664366
tRNA	tRNA-Pro-TGG-3-5	388.238	0.00707641	miRNA	hsa-mir-10399	151.976	0.00664054
miRNA	hsa-mir-320b-1	375.381	0.00684206	piRNA	hsa_piR_019420|gb|DQ596670|Homo_sapiens	151.81	0.00663326
miRNA	hsa-mir-196b	370.024	0.00674442	miRNA	hsa-mir-99a	149.143	0.00651674
protein_coding	AC106782.9-001	358.238	0.0065296	miRNA	hsa-mir-885	146.262	0.00639086
YRNA	RNY4P37-201	341.095	0.00621714	miRNA	hsa-mir-337	145.738	0.00636797
miRNA	hsa-mir-181d	339.429	0.00618676	miRNA	hsa-mir-128-2	145.119	0.00634092
miRNA	hsa-mir-19a	339.333	0.00618502	miRNA	hsa-mir-1228	143.024	0.00624937
piRNA	hsa_piR_004153|gb|DQ575660|Homo_sapiens	336.833	0.00613946	miRNA	hsa-mir-766	140.595	0.00614326
miRNA	hsa-mir-127	333.167	0.00607262	miRNA	hsa-mir-206	138.905	0.00606939
miRNA	hsa-mir-877	332.929	0.00606829	miRNA	hsa-mir-127	138.405	0.00604754
miRNA	hsa-mir-345	327.31	0.00596587	other_TMapped	ENST00000464816.1	136.952	0.00598408
miRNA	hsa-mir-483	326.643	0.00595372	miRNA	hsa-mir-338	135.405	0.00591646
protein_coding	RP11-315I20.11-001	324.143	0.00590815	YRNA	RNY1P12-201	135.31	0.0059123
miRNA	hsa-mir-99a	323	0.00588732	miRNA	hsa-mir-6511a-4	133.667	0.00584051
miRNA	hsa-mir-411	322.643	0.00588081	miRNA	hsa-mir-598	133.262	0.00582283
miRNA	hsa-mir-101-2	320.381	0.00583958	miRNA	hsa-mir-326	131.619	0.00575104
YRNA	RNY4P6-201	320.119	0.00583481	miRNA	hsa-mir-32	131.333	0.00573856
protein_coding	RP11-694I15.3-001	320.095	0.00583437	miRNA	hsa-mir-2110	131.286	0.00573648
miRNA	hsa-mir-769	317.19	0.00578143	protein_coding	RP1-223H12.1-002	129.262	0.00564805
miRNA	hsa-mir-766	316.333	0.0057658	other_TMapped	ENST00000362330.2	127.476	0.00557002
other_TMapped	ENST00000459091.1	315.048	0.00574237	miRNA	hsa-mir-6511b-2	126.429	0.00552425
miRNA	hsa-mir-195	313.214	0.00570895	miRNA	hsa-mir-1180	124.571	0.0054431
miRNA	hsa-mir-200c	308.762	0.0056278	tRNA	tRNA-Pro-TGG-3-5	121.476	0.00530786
miRNA	hsa-mir-29b-2	300.024	0.00546853	miRNA	hsa-mir-548j	118.024	0.00515701
miRNA	hsa-mir-370	298.214	0.00543555	piRNA	hsa_piR_014620|gb|DQ590013|Homo_sapiens	117.429	0.005131
miRNA	hsa-mir-18a	296.31	0.00540083	tRNA	tRNA-Val-CAC-2-1	115.881	0.00506337
protein_coding	RP11-227B21.1-001	293.071	0.00534181	protein_coding	RP11-849F2.1-001	114.952	0.0050228
piRNA	hsa_piR_018570|gb|DQ595536|Homo_sapiens	291.762	0.00531794	miRNA	hsa-mir-301a	112.762	0.00492709
tRNA	tRNA-Ser-GCT-6-1	290.786	0.00530015	miRNA	hsa-mir-4732	112.143	0.00490004
other_TMapped	ENST00000390880.2	288.405	0.00525675	other_TMapped	ENST00000516950.1	111.405	0.00486779
piRNA	hsa_piR_020485|gb|DQ598159|Homo_sapiens	285.548	0.00520467	other_TMapped	ENST00000387460.2	110.714	0.00483762
tRNA	tRNA-Leu-CAG-2-2	280.619	0.00511484	miRNA	hsa-mir-550b-2	109.238	0.00477312
protein_coding	RP11-849F2.1-001	276.5	0.00503976	protein_coding	SMC1A-202	109.119	0.00476792
tRNA	tRNA-Val-CAC-3-1	275.071	0.00501372	miRNA	hsa-mir-1273h	107.548	0.00469925
protein_coding	CTB-61I7.2-001	268.19	0.0048883	other_TMapped	ENST00000365138.1	107.167	0.00468261
other_TMapped	ENST00000554988.1	265.19	0.00483362	protein_coding	AC008555.4-002	106.69	0.0046618
miRNA	hsa-mir-194-1	263.476	0.00480238	other_TMapped	ENST00000362512.1	105.833	0.00462435
miRNA	hsa-mir-145	261	0.00475724	protein_coding	RP11-823O21.1-005	105.405	0.00460562
miRNA	hsa-mir-889	255.5	0.004657	miRNA	hsa-mir-195	103.214	0.00450991
miRNA	hsa-mir-329-1	254.81	0.00464441	miRNA	hsa-mir-6741	102.5	0.0044787
tRNA	tRNA-Gly-TCC-3-1	248.929	0.00453722	protein_coding	RP11-392P7.4-001	101.881	0.00445165
miRNA	hsa-mir-32	246.81	0.00449859	miRNA	hsa-mir-125b-1	101.381	0.0044298
protein_coding	RP11-727F15.8-001	245.548	0.00447559	miRNA	hsa-mir-136	100.976	0.00441212
miRNA	hsa-mir-331	244.214	0.00445129	miRNA	hsa-mir-7706	99.6429	0.00435386
tRNA	tRNA-Lys-CTT-4-1	243.31	0.0044348	tRNA	tRNA-Glu-TTC-14-1	98.6905	0.00431224
other_TMapped	ENST00000364596.1	240.262	0.00437925	miRNA	hsa-mir-6819	98.0714	0.00428519
other_TMapped	ENST00000365241.1	239.762	0.00437014	protein_coding	AC097382.3-001	97.119	0.00424358
miRNA	hsa-mir-4286	238.238	0.00434236	miRNA	hsa-mir-3620	96.7619	0.00422798
other_TMapped	ENST00000467525.5	236.857	0.00431719	miRNA	hsa-mir-24-1	93.9524	0.00410521
miRNA	hsa-mir-132	236.714	0.00431459	miRNA	hsa-mir-106a	93.2381	0.004074
miRNA	hsa-mir-381	231.548	0.00422042	miRNA	hsa-mir-376c	93.2143	0.00407296
piRNA	hsa_piR_001170|gb|DQ571526|Homo_sapiens	229.333	0.00418006	miRNA	hsa-mir-6734	93.1429	0.00406984
piRNA	hsa_piR_000823|gb|DQ571031|Homo_sapiens	228.452	0.004164	miRNA	hsa-mir-6852	91.9524	0.00401782
miRNA	hsa-mir-598	228.429	0.00416356	tRNA	tRNA-Gly-CCC-2-2	90.0476	0.0039346
other_TMapped	ENST00000387314.1	224.571	0.00409326	YRNA	RNY4P9-201	87.9048	0.00384097
protein_coding	LA16c-390E6.1-002	217.524	0.0039648	miRNA	hsa-mir-345	87.0238	0.00380247
miRNA	hsa-mir-24-1	216.857	0.00395265	miRNA	hsa-mir-29b-2	86.5952	0.00378375
other_TMapped	ENST00000363624.1	214.071	0.00390188	tRNA	tRNA-Leu-CAG-2-2	85.9524	0.00375566
miRNA	hsa-mir-107	210.69	0.00384025	miRNA	hsa-mir-23b	85.8571	0.0037515
miRNA	hsa-mir-10399	210.381	0.00383461	miRNA	hsa-mir-200c	85.8333	0.00375046
protein_coding	AC040162.22-012	209.119	0.00381161	other_TMapped	ENST00000387449.1	85.7143	0.00374525
tRNA	tRNA-Glu-TTC-14-1	207.786	0.00378731	miRNA	hsa-mir-11400	84.4762	0.00369116
piRNA	hsa_piR_001312|gb|DQ571813|Homo_sapiens	206.69	0.00376734	miRNA	hsa-mir-363	83.4286	0.00364538
miRNA	hsa-mir-629	206.167	0.0037578	miRNA	hsa-mir-100	82.6905	0.00361313
protein_coding	CTB-54O9.4-002	201.857	0.00367925	miRNA	hsa-mir-454	82.0238	0.003584
miRNA	hsa-mir-548j	201.81	0.00367838	other_TMapped	ENST00000389680.2	81.2857	0.00355175
miRNA	hsa-mir-136	198.81	0.0036237	miRNA	hsa-mir-376a-1	78.9762	0.00345084
protein_coding	RP13-554M15.1-001	195.619	0.00356555	other_TMapped	ENST00000410344.1	78.6429	0.00343627
miRNA	hsa-mir-410	191.143	0.00348396	protein_coding	AC124074.1-005	77.2857	0.00337697
miRNA	hsa-mir-550b-2	190.738	0.00347658	protein_coding	AC025750.4-002	76.4286	0.00333952
other_TMapped	ENST00000635935.1	190.262	0.0034679	miRNA	hsa-mir-196b	76.1429	0.00332703
other_TMapped	ENST00000387409.1	189.571	0.00345532	tRNA	tRNA-Lys-CTT-4-1	76.0714	0.00332391
protein_coding	RP11-382F24.7-001	189.452	0.00345315	YRNA	RNY3P2-201	75.9524	0.00331871
miRNA	hsa-mir-628	188.762	0.00344056	YRNA	RNY4P6-201	75.2619	0.00328854
miRNA	hsa-mir-433	186.643	0.00340194	miRNA	hsa-mir-3173	74.881	0.0032719
miRNA	hsa-mir-375	185.833	0.00338718	miRNA	hsa-mir-671	74.1429	0.00323964
protein_coding	RP11-192K2.3-014	185.714	0.00338501	miRNA	hsa-mir-3529	74.0476	0.00323548
other_TMapped	ENST00000384478.1	184.024	0.0033542	piRNA	hsa_piR_000823|gb|DQ571031|Homo_sapiens	73.7857	0.00322404
protein_coding	MT-CO2-201	178.81	0.00325916	miRNA	hsa-mir-628	73.2857	0.00320219
miRNA	hsa-mir-95	176.167	0.00321099	piRNA	hsa_piR_020365|gb|DQ597975|Homo_sapiens	73.2857	0.00320219
protein_coding	RP11-469L3.1-001	173.881	0.00316933	tRNA	tRNA-Gly-GCC-3-1	72.2619	0.00315746
miRNA	hsa-mir-26a-1	173.833	0.00316846	tRNA	tRNA-Lys-TTT-5-1	71.381	0.00311896
miRNA	hsa-mir-424	171.69	0.0031294	miRNA	hsa-mir-939	71.1667	0.0031096
protein_coding	RP11-203J14.1-001	167.976	0.0030617	miRNA	hsa-let-7f-1	70.2619	0.00307007
protein_coding	RP11-177A2.2-001	165.476	0.00301613	miRNA	hsa-mir-3120	69.4286	0.00303366
tRNA	tRNA-Val-AAC-1-1	164.5	0.00299834	other_TMapped	ENST00000390880.2	69.2381	0.00302533
other_TMapped	ENST00000387461.2	164.452	0.00299747	other_TMapped	ENST00000363331.1	67.5952	0.00295355
miRNA	hsa-mir-338	161.214	0.00293845	miRNA	hsa-mir-760	67.0476	0.00292962
other_TMapped	ENST00000479052.5	161.048	0.00293541	YRNA	RNY4P25-201	66.2381	0.00289425
other_TMapped	ENST00000362765.1	159.857	0.00291371	miRNA	hsa-mir-320b-2	66.1905	0.00289217
miRNA	hsa-mir-20b	156.357	0.00284992	piRNA	hsa_piR_015249|gb|DQ590830|Homo_sapiens	66.1667	0.00289113
piRNA	hsa_piR_015249|gb|DQ590830|Homo_sapiens	151.143	0.00275488	miRNA	hsa-mir-1301	66.1429	0.00289009
miRNA	hsa-mir-590	149.952	0.00273318	piRNA	hsa_piR_015026|gb|DQ590548|Homo_sapiens	65.5714	0.00286512
protein_coding	AC005263.8-002	149.167	0.00271886	miRNA	hsa-mir-411	65.3333	0.00285472
other_TMapped	ENST00000365160.1	148.548	0.00270758	protein_coding	CTB-54O9.4-003	64.7143	0.00282767
miRNA	hsa-mir-1273h	148.119	0.00269976	other_TMapped	ENST00000635449.1	63.9762	0.00279542
piRNA	hsa_piR_014620|gb|DQ590013|Homo_sapiens	145.786	0.00265723	miRNA	hsa-mir-381	63.3095	0.00276629
miRNA	hsa-mir-133a-2	144.476	0.00263337	protein_coding	RP11-29B2.2-002	63.0476	0.00275484
other_TMapped	ENST00000363331.1	144.381	0.00263163	piRNA	hsa_piR_009295|gb|DQ582567|Homo_sapiens	62.8095	0.00274444
other_TMapped	ENST00000363171.1	143.619	0.00261774	other_TMapped	ENST00000387441.1	62.7381	0.00274132
miRNA	hsa-mir-181a-1	143.238	0.0026108	piRNA	hsa_piR_016970|gb|DQ593407|Homo_sapiens	62.6429	0.00273716
protein_coding	MMRN1-201	141.857	0.00258563	other_TMapped	ENST00000425645.2	62.4762	0.00272987
tRNA	tRNA-His-GTG-1-9	141.762	0.00258389	miRNA	hsa-mir-3138	62.381	0.00272571
miRNA	hsa-mir-11400	138.81	0.00253008	protein_coding	RP11-317N8.1-001	61.9286	0.00270595
piRNA	hsa_piR_001311|gb|DQ571812|Homo_sapiens	138.619	0.00252661	miRNA	hsa-mir-889	60.9524	0.00266329
tRNA	tRNA-Gly-TCC-1-1	135.905	0.00247713	tRNA	tRNA-Leu-TAG-1-1	60.8571	0.00265913
piRNA	hsa_piR_020829|gb|DQ598677|Homo_sapiens	134	0.00244242	protein_coding	RP11-295J3.5-001	60.3333	0.00263624
other_TMapped	ENST00000386347.1	131.357	0.00239425	other_TMapped	ENST00000516795.1	60.3333	0.00263624
miRNA	hsa-mir-1301	131.31	0.00239338	other_TMapped	ENST00000551112.1	59.881	0.00261648
miRNA	hsa-mir-589	130.381	0.00237645	protein_coding	AC069368.3-001	59.5	0.00259983
miRNA	hsa-mir-363	129.286	0.00235649	miRNA	hsa-mir-374b	58.9762	0.00257694
miRNA	hsa-mir-190a	127.095	0.00231656	protein_coding	RP11-293P20.1-001	58.7381	0.00256654
miRNA	hsa-mir-1277	126.786	0.00231092	protein_coding	RP1-159A19.1-015	58.619	0.00256134
miRNA	hsa-mir-671	126.738	0.00231005	protein_coding	CTB-61I7.2-001	57.7619	0.00252388
miRNA	hsa-mir-2110	125.595	0.00228922	miRNA	hsa-mir-133a-2	56.3571	0.0024625
other_TMapped	ENST00000364678.1	124.19	0.00226362	other_TMapped	ENST00000451362.1	55.7381	0.00243546
protein_coding	PAQR5-201	124.167	0.00226318	other_TMapped	ENST00000500358.6	55.1905	0.00241153
other_TMapped	ENST00000490232.3	123.667	0.00225407	miRNA	hsa-mir-320c-2	55.0714	0.00240633
protein_coding	RP11-193H5.6-001	122.167	0.00222673	other_TMapped	ENST00000363314.1	54.6667	0.00238864
protein_coding	RP11-18O13.1-004	120.881	0.0022033	piRNA	hsa_piR_004309|gb|DQ575884|Homo_sapiens	54.619	0.00238656
tRNA	tRNA-Asp-GTC-2-9	119.333	0.00217509	piRNA	hsa_piR_016742|gb|DQ593049|Homo_sapiens	53.7143	0.00234703
miRNA	hsa-mir-6852	119.143	0.00217162	protein_coding	RP11-227B21.1-001	53.3333	0.00233038
piRNA	hsa_piR_020388|gb|DQ598008|Homo_sapiens	118.095	0.00215252	tRNA	tRNA-Gly-TCC-1-1	52.881	0.00231061
miRNA	hsa-mir-2355	117.548	0.00214254	protein_coding	AC005263.8-002	52.2381	0.00228252
tRNA	tRNA-Gln-CTG-4-2	117.119	0.00213473	miRNA	hsa-mir-2355	52.0714	0.00227524
piRNA	hsa_piR_000291|gb|DQ570344|Homo_sapiens	117.048	0.00213343	piRNA	hsa_piR_016658|gb|DQ592931|Homo_sapiens	51.5238	0.00225131
other_TMapped	ENST00000363745.1	116.81	0.00212909	other_TMapped	ENST00000412740.6	50.9286	0.0022253
miRNA	hsa-mir-6511a-4	116.714	0.00212735	tRNA	tRNA-His-GTG-1-9	50.8333	0.00222114
other_TMapped	ENST00000414659.5	116.714	0.00212735	miRNA	hsa-mir-590	50.119	0.00218993
miRNA	hsa-mir-154	116.167	0.00211737	miRNA	hsa-mir-589	50.0476	0.00218681
tRNA	tRNA-Lys-TTT-5-1	114.119	0.00208005	tRNA	tRNA-iMet-CAT-1-8	49.6429	0.00216913
miRNA	hsa-mir-181b-1	114	0.00207788	miRNA	hsa-mir-107	49.619	0.00216809
miRNA	hsa-mir-301a	113.476	0.00206833	miRNA	hsa-mir-410	49.5714	0.002166
tRNA	tRNA-Arg-CCT-5-1	112.81	0.00205618	miRNA	hsa-mir-452	49.4524	0.0021608
other_TMapped	ENST00000362512.1	110.024	0.0020054	other_TMapped	ENST00000451853.1	49.1905	0.00214936
miRNA	hsa-mir-10527	109.762	0.00200063	other_TMapped	ENST00000487558.1	49.1429	0.00214728
tRNA	tRNA-iMet-CAT-1-8	109.643	0.00199846	protein_coding	RP11-215L17.2-001	47.8095	0.00208902
tRNA	tRNA-Glu-TTC-1-2	108.881	0.00198457	protein_coding	Z84721.5-006	47.2381	0.00206405
protein_coding	MT-ND5-201	108.214	0.00197242	piRNA	hsa_piR_020829|gb|DQ598677|Homo_sapiens	46.8333	0.00204636
miRNA	hsa-let-7a-2	107.81	0.00196504	protein_coding	AC090282.2-003	45.7857	0.00200059
miRNA	hsa-mir-210	106.524	0.00194161	miRNA	hsa-mir-3617	45.5952	0.00199227
protein_coding	RP3-337O18.1-012	105.857	0.00192946	tRNA	tRNA-Gly-TCC-3-1	45.2143	0.00197562
miRNA	hsa-mir-6741	105.857	0.00192946	other_TMapped	ENST00000572227.1	44.9286	0.00196314
protein_coding	RP11-295J3.5-001	103.429	0.00188519	miRNA	hsa-mir-181b-1	44.7381	0.00195481
protein_coding	RP1-159A19.1-015	103.048	0.00187825	other_TMapped	ENST00000414659.5	44.3095	0.00193609
protein_coding	RP11-645N11.2-002	102.786	0.00187347	miRNA	hsa-mir-4742	44.2143	0.00193193
tRNA	tRNA-Pro-TGG-3-1	102.167	0.00186219	protein_coding	RP11-469L3.1-001	44.119	0.00192777
other_TMapped	ENST00000365448.1	102.048	0.00186002	miRNA	hsa-mir-181a-1	43.9048	0.0019184
other_TMapped	ENST00000387456.1	102	0.00185915	miRNA	hsa-mir-1976	43.7619	0.00191216
other_TMapped	ENST00000540957.1	101.571	0.00185134	miRNA	hsa-mir-26a-1	43	0.00187887
protein_coding	CTD-2083E4.1-002	100.738	0.00183615	miRNA	hsa-mir-1229	42.5476	0.0018591
tRNA	tRNA-Gly-CCC-2-1	100.476	0.00183138	piRNA	hsa_piR_020485|gb|DQ598159|Homo_sapiens	42.2381	0.00184558
miRNA	hsa-mir-494	100.429	0.00183051	other_TMapped	ENST00000448737.1	42.0238	0.00183621
piRNA	hsa_piR_019752|gb|DQ597110|Homo_sapiens	100.31	0.00182834	other_TMapped	ENST00000416316.1	41.881	0.00182997
other_TMapped	ENST00000635449.1	99.8571	0.00182009	miRNA	hsa-mir-548e	41.8571	0.00182893
other_TMapped	ENST00000387392.1	98.9286	0.00180317	piRNA	hsa_piR_020009|gb|DQ597484|Homo_sapiens	41.7619	0.00182477
miRNA	hsa-mir-320d-1	98.6905	0.00179883	protein_coding	AC106782.9-001	41.5476	0.00181541
miRNA	hsa-mir-3120	98.4048	0.00179362	miRNA	hsa-mir-320e	41.1905	0.0017998
miRNA	hsa-mir-376c	96.5476	0.00175977	tRNA	tRNA-Glu-TTC-1-2	41.119	0.00179668
protein_coding	MT-ND1-201	95.8571	0.00174719	miRNA	hsa-mir-636	41.0238	0.00179252
piRNA	hsa_piR_015026|gb|DQ590548|Homo_sapiens	95.5952	0.00174241	protein_coding	CTB-54O9.4-002	40.5714	0.00177275
other_TMapped	ENST00000469309.1	94.7143	0.00172636	miRNA	hsa-mir-5010	40.2143	0.00175715
protein_coding	RP11-184I16.1-001	94.1667	0.00171637	other_TMapped	ENST00000641545.1	39.8333	0.0017405
piRNA	hsa_piR_004309|gb|DQ575884|Homo_sapiens	92.0714	0.00167818	other_TMapped	ENST00000647441.1	39.7619	0.00173738
other_TMapped	ENST00000387405.1	91.5952	0.00166951	other_TMapped	ENST00000510841.1	39.0952	0.00170825
piRNA	hsa_piR_020365|gb|DQ597975|Homo_sapiens	91.4048	0.00166603	miRNA	hsa-mir-4646	38.6429	0.00168849
protein_coding	RP11-114B6.1-001	90.3333	0.0016465	protein_coding	RP11-192K2.3-014	37.8333	0.00165311
protein_coding	RP1-223H12.1-002	90.2143	0.00164433	protein_coding	RP11-100H21.3-001	37.8095	0.00165207
miRNA	hsa-mir-1246	90.0714	0.00164173	miRNA	hsa-mir-3200	37.7857	0.00165103
miRNA	hsa-mir-6511b-2	87.8095	0.0016005	protein_coding	RP11-474L7.5-001	37.5952	0.00164271
miRNA	hsa-mir-6819	87.3333	0.00159182	protein_coding	CTC-326K19.5-003	37.5714	0.00164167
protein_coding	RP1-179N16.4-001	87.2619	0.00159052	tRNA	tRNA-Val-CAC-3-1	37.4048	0.00163439
miRNA	hsa-mir-374b	85.6429	0.00156101	protein_coding	AC104389.17-004	37.3571	0.00163231
miRNA	hsa-mir-103a-1	85.1429	0.0015519	tRNA	tRNA-Val-CAC-6-1	36.6905	0.00160318
tRNA	tRNA-Val-TAC-2-1	84.1429	0.00153367	tRNA	tRNA-Val-AAC-1-1	36.5714	0.00159797
tRNA	tRNA-Val-CAC-6-1	83.119	0.00151501	piRNA	hsa_piR_019951|gb|DQ597403|Homo_sapiens	36.381	0.00158965
miRNA	hsa-mir-100	82.9048	0.0015111	miRNA	hsa-mir-941-5	36.3333	0.00158757
tRNA	tRNA-Val-CAC-2-1	82.7857	0.00150893	protein_coding	RP13-554M15.1-001	36.2857	0.00158549
miRNA	hsa-mir-500a	80.4048	0.00146554	other_TMapped	ENST00000567819.1	35.8571	0.00156676
miRNA	hsa-mir-556	79.119	0.0014421	miRNA	hsa-mir-616	35.8095	0.00156468
protein_coding	AC013437.1-001	78.7143	0.00143472	tRNA	tRNA-Thr-CGT-4-1	35.7381	0.00156156
protein_coding	RP11-18O13.1-001	78.381	0.00142865	tRNA	tRNA-Gln-CTG-4-2	35.619	0.00155636
protein_coding	AC008555.4-002	77.8571	0.0014191	miRNA	hsa-mir-3928	35.4048	0.001547
other_TMapped	ENST00000500689.1	77.7143	0.0014165	protein_coding	RP11-177A2.2-001	35	0.00152931
other_TMapped	ENST00000468083.1	76.9048	0.00140174	other_TMapped	ENST00000417432.1	34.8095	0.00152099
miRNA	hsa-mir-106a	76.8333	0.00140044	protein_coding	RP4-773A18.1-003	34.5238	0.0015085
protein_coding	CTB-54O9.4-003	76.3571	0.00139176	piRNA	hsa_piR_020499|gb|DQ598183|Homo_sapiens	34.2143	0.00149498
miRNA	hsa-mir-941-5	76.0952	0.00138699	protein_coding	CTB-25B13.2-004	34.1429	0.00149186
protein_coding	AC097382.3-001	75.5238	0.00137657	miRNA	hsa-mir-8072	34.0714	0.00148874
piRNA	hsa_piR_019951|gb|DQ597403|Homo_sapiens	74.5238	0.00135834	other_TMapped	ENST00000468083.1	34.0476	0.0014877
other_TMapped	ENST00000622201.1	74.4048	0.00135617	other_TMapped	ENST00000613023.1	33.8571	0.00147938
protein_coding	AC018731.1-001	73.6429	0.00134229	miRNA	hsa-mir-200b	33.4048	0.00145961
miRNA	hsa-mir-376a-1	73.5	0.00133968	miRNA	hsa-mir-331	33.381	0.00145857
miRNA	hsa-mir-3620	72.381	0.00131929	protein_coding	RP11-158H5.1-001	32.9524	0.00143984
other_TMapped	ENST00000362645.1	71.6429	0.00130583	miRNA	hsa-mir-503	32.8571	0.00143568
tRNA	tRNA-Pro-AGG-2-1	71.0238	0.00129455	protein_coding	RP11-67H12.1-003	32.6429	0.00142632
miRNA	hsa-mir-1296	70.0952	0.00127763	protein_coding	RP11-277J24.3-001	32.619	0.00142528
tRNA	tRNA-Asp-GTC-1-1	69.5	0.00126678	protein_coding	RP11-694I15.3-001	32.1905	0.00140655
tRNA	tRNA-Ala-TGC-3-2	69.3095	0.0012633	miRNA	hsa-mir-154	32.1905	0.00140655
piRNA	hsa_piR_019420|gb|DQ596670|Homo_sapiens	69.0238	0.0012581	miRNA	hsa-mir-487a	32.0476	0.00140031
protein_coding	AC004098.3-005	69.0238	0.0012581	miRNA	hsa-mir-6842	31.7619	0.00138782
miRNA	hsa-mir-9-2	68.6667	0.00125159	miRNA	hsa-mir-193b	31.2619	0.00136598
miRNA	hsa-mir-452	68.3571	0.00124594	protein_coding	U47924.23-006	31.2143	0.0013639
miRNA	hsa-mir-487a	68.0476	0.0012403	other_TMapped	ENST00000515924.1	31.1667	0.00136182
other_TMapped	ENST00000623544.1	66.881	0.00121904	miRNA	hsa-mir-1277	30.6905	0.00134101
other_TMapped	ENST00000465244.1	66.3095	0.00120862	protein_coding	RP11-694I15.3-003	30.4048	0.00132852
miRNA	hsa-mir-760	65.6667	0.00119691	tRNA	tRNA-Asp-GTC-1-1	30.2619	0.00132228
tRNA	tRNA-Gln-TTG-3-3	65.5952	0.0011956	piRNA	hsa_piR_018570|gb|DQ595536|Homo_sapiens	30.0476	0.00131292
other_TMapped	ENST00000551112.1	65.5238	0.0011943	other_TMapped	ENST00000438412.5	29.9286	0.00130772
miRNA	hsa-mir-204	63.881	0.00116436	miRNA	hsa-mir-6810	29.8333	0.00130356
protein_coding	RP11-837J7.2-010	63.619	0.00115958	protein_coding	RP1-287G14.6-008	29.7857	0.00130148
other_TMapped	ENST00000550403.5	63.0714	0.0011496	protein_coding	RP11-399J11.2-001	29.7143	0.00129835
other_TMapped	ENST00000365274.1	62.9286	0.001147	other_TMapped	ENST00000585366.1	29.619	0.00129419
other_TMapped	ENST00000384541.1	62.881	0.00114613	other_TMapped	ENST00000363120.1	29.5476	0.00129107
protein_coding	MT-CO3-201	61.619	0.00112313	protein_coding	RP11-393H10.3-001	29.4524	0.00128691
miRNA	hsa-mir-548e	61.2143	0.00111575	miRNA	hsa-mir-95	29.4524	0.00128691
other_TMapped	ENST00000363899.1	61	0.00111185	miRNA	hsa-mir-3605	29.2381	0.00127755
miRNA	hsa-mir-656	60.7381	0.00110707	protein_coding	RP11-203M5.5-003	28.9286	0.00126402
protein_coding	AC005789.6-002	60.7143	0.00110664	other_TMapped	ENST00000384478.1	28.9286	0.00126402
protein_coding	RP11-203M5.5-002	60.6429	0.00110534	protein_coding	AC005789.6-002	28.7143	0.00125466
protein_coding	RP1-287G14.6-008	60.619	0.0011049	miRNA	hsa-mir-203b	28.5	0.0012453
YRNA	RNY1P13-201	60.2619	0.00109839	protein_coding	RP11-301A5.1-001	28.3571	0.00123905
tRNA	tRNA-Arg-TCT-2-1	59.8095	0.00109015	miRNA	hsa-mir-1468	28.2143	0.00123281
protein_coding	RP11-9F19.1-002	58.7143	0.00107018	other_TMapped	ENST00000384093.1	28	0.00122345
miRNA	hsa-mir-200b	58.6667	0.00106932	miRNA	hsa-mir-1246	27.9524	0.00122137
miRNA	hsa-mir-1260b	57.5714	0.00104935	miRNA	hsa-mir-6721	27.7857	0.00121409
tRNA	tRNA-Asn-GTT-6-1	57.4524	0.00104718	protein_coding	RP11-68C8.3-001	27.6905	0.00120992
protein_coding	RP4-659I19.2-002	57.0476	0.00103981	miRNA	hsa-mir-4466	27.6905	0.00120992
protein_coding	AC139452.3-001	56.1429	0.00102332	other_TMapped	ENST00000623544.1	27.6429	0.00120784
other_TMapped	ENST00000572227.1	55.9524	0.00101984	miRNA	hsa-mir-329-1	27.619	0.0012068
piRNA	hsa_piR_000805|gb|DQ571003|Homo_sapiens	55.5714	0.0010129	other_TMapped	ENST00000362765.1	27.619	0.0012068
other_TMapped	ENST00000491451.3	55.5	0.0010116	other_TMapped	ENST00000387400.1	27.5714	0.00120472
tRNA	tRNA-Trp-CCA-2-1	55.381	0.00100943	piRNA	hsa_piR_019825|gb|DQ597218|Homo_sapiens	27.5476	0.00120368
protein_coding	RP11-260H5__B.1-002	55.3333	0.00100856	miRNA	hsa-mir-1287	27.5238	0.00120264
miRNA	hsa-mir-503	55.3095	0.00100813	other_TMapped	ENST00000362645.1	27.5	0.0012016
protein_coding	CTC-471J1.6-002	54.8571	0.000999881	protein_coding	CTD-3199J23.1-022	27.119	0.00118496
miRNA	hsa-mir-7706	54.7143	0.000997277	miRNA	hsa-mir-548ax	27.0714	0.00118288
miRNA	hsa-mir-548ax	54.381	0.000991201	tRNA	tRNA-Gln-TTG-3-3	26.7381	0.00116831
miRNA	hsa-mir-3173	53.8333	0.00098122	piRNA	hsa_piR_019949|gb|DQ597397|Homo_sapiens	26.7143	0.00116727
miRNA	hsa-mir-539	53.1905	0.000969502	miRNA	hsa-mir-190b	26.6905	0.00116623
tRNA	tRNA-Met-CAT-1-1	52.9524	0.000965162	miRNA	hsa-mir-6777	26.5476	0.00115999
miRNA	hsa-mir-3138	52.7143	0.000960823	protein_coding	RP11-141E21.1-001	26.4762	0.00115687
tRNA	tRNA-Glu-TTC-4-2	52.5476	0.000957785	protein_coding	RP3-493F7.3-001	26.2619	0.0011475
piRNA	hsa_piR_000794|gb|DQ570992|Homo_sapiens	52.4524	0.000956049	protein_coding	ABC13-47488600E17.1-002	26.2143	0.00114542
tRNA	tRNA-Gly-CCC-1-2	52.3571	0.000954313	miRNA	hsa-mir-542	26.0952	0.00114022
miRNA	hsa-mir-501	51.9762	0.000947369	miRNA	hsa-mir-4665	25.9524	0.00113398
other_TMapped	ENST00000563151.1	51.2857	0.000934784	other_TMapped	ENST00000387461.2	25.9524	0.00113398
other_TMapped	ENST00000605196.1	51.1429	0.00093218	protein_coding	RP4-543J19.3-001	25.9286	0.00113294
miRNA	hsa-mir-1180	50.9286	0.000928274	protein_coding	RP11-184I16.1-001	25.7857	0.0011267
miRNA	hsa-mir-6842	50.3571	0.000917859	miRNA	hsa-mir-7110	25.7857	0.0011267
protein_coding	RP11-301A5.1-001	50.3095	0.000916991	protein_coding	RP11-382F24.7-001	25.619	0.00111941
protein_coding	CTB-25B13.1-003	49.4762	0.000901802	protein_coding	RP11-395B7.1-001	25.5714	0.00111733
other_TMapped	ENST00000567819.1	49.3333	0.000899198	protein_coding	RP11-411B6.1-002	25.3095	0.00110589
protein_coding	AC090260.5-001	49.3333	0.000899198	piRNA	hsa_piR_000805|gb|DQ571003|Homo_sapiens	25.2619	0.00110381
miRNA	hsa-mir-3617	49.119	0.000895292	protein_coding	AC108476.2-003	25.2619	0.00110381
miRNA	hsa-mir-496	48.3333	0.000880971	other_TMapped	ENST00000490232.3	25.0238	0.00109341
miRNA	hsa-mir-128-2	48.2857	0.000880103	miRNA	hsa-mir-1292	24.8333	0.00108508
tRNA	tRNA-Phe-GAA-1-6	48	0.000874895	YRNA	RNY4P37-201	24.8095	0.00108404
other_TMapped	ENST00000387382.1	48	0.000874895	protein_coding	RP11-30K9.3-004	24.7381	0.00108092
miRNA	hsa-mir-655	47.0476	0.000857536	other_TMapped	ENST00000585237.2	24.6429	0.00107676
other_TMapped	ENST00000365208.1	46.6905	0.000851027	tRNA	tRNA-Glu-TTC-4-2	24.5952	0.00107468
protein_coding	RP11-39C2.1-003	46.5238	0.000847989	other_TMapped	ENST00000387456.1	24.5714	0.00107364
miRNA	hsa-mir-4732	46.3095	0.000844083	other_TMapped	ENST00000536317.5	24.5476	0.0010726
miRNA	hsa-mir-758	46.1667	0.000841479	protein_coding	AL135747.3-003	24.381	0.00106532
other_TMapped	ENST00000387419.1	46.1667	0.000841479	tRNA	tRNA-Asp-GTC-2-9	24.3571	0.00106428
protein_coding	AC103858.1-003	45.9524	0.000837574	miRNA	hsa-mir-1294	24.2857	0.00106116
other_TMapped	ENST00000444889.1	45.7381	0.000833668	piRNA	hsa_piR_000291|gb|DQ570344|Homo_sapiens	24.2619	0.00106011
other_TMapped	ENST00000646170.1	45.5476	0.000830196	miRNA	hsa-mir-548l	24.1667	0.00105595
other_TMapped	ENST00000364545.1	45.4286	0.000828026	protein_coding	RP11-242O24.1-016	23.881	0.00104347
tRNA	tRNA-Cys-GCA-4-1	45.0952	0.00082195	miRNA	hsa-mir-3127	23.8095	0.00104035
protein_coding	AL157871.1-002	44.9524	0.000819347	miRNA	hsa-mir-548q	23.6905	0.00103515
piRNA	hsa_piR_020499|gb|DQ598183|Homo_sapiens	44.4762	0.000810667	miRNA	hsa-mir-500a	23.6667	0.00103411
miRNA	hsa-mir-203b	44.1905	0.000805459	protein_coding	Z84721.6-006	23.5238	0.00102786
protein_coding	AC025750.4-002	44.1905	0.000805459	miRNA	hsa-mir-548k	23.5238	0.00102786
tRNA	tRNA-Thr-CGT-4-1	43.5476	0.000793742	miRNA	hsa-mir-4429	23.4286	0.0010237
other_TMapped	ENST00000635274.1	43.5238	0.000793308	miRNA	hsa-mir-5187	23.3571	0.00102058
piRNA	hsa_piR_019914|gb|DQ597347|Homo_sapiens	43.4286	0.000791572	protein_coding	CTD-2325H11.3-001	23.1429	0.00101122
protein_coding	RP4-543J19.3-001	43.119	0.00078593	miRNA	hsa-mir-370	23.119	0.00101018
protein_coding	AL135747.3-003	42.9286	0.000782459	miRNA	hsa-mir-651	23.0476	0.00100706
tRNA	tRNA-Val-CAC-14-1	42.8333	0.000780723	other_TMapped	ENST00000602813.1	22.9286	0.00100186
miRNA	hsa-mir-1255a	42.7381	0.000778987	protein_coding	AL157871.1-002	22.9048	0.00100081
miRNA	hsa-mir-5010	42.6667	0.000777685	miRNA	hsa-mir-5193	22.881	0.000999775
miRNA	hsa-mir-377	42.4762	0.000774213	other_TMapped	ENST00000387409.1	22.881	0.000999775
miRNA	hsa-mir-548k	42.1667	0.000768571	other_TMapped	ENST00000597346.1	22.8571	0.000998734
tRNA	tRNA-Gln-CTG-5-1	42.0952	0.000767269	other_TMapped	ENST00000362433.1	22.5952	0.00098729
miRNA	hsa-mir-3928	42	0.000765534	piRNA	hsa_piR_001312|gb|DQ571813|Homo_sapiens	22.5	0.000983129
miRNA	hsa-mir-1468	41.9524	0.000764666	YRNA	RNY4P13-201	22.3571	0.000976887
protein_coding	AC015689.1-001	41.7857	0.000761628	tRNA	tRNA-Arg-CCT-5-1	22.2381	0.000971685
protein_coding	MT-CYB-201	41.5476	0.000757288	miRNA	hsa-mir-1270	22.1905	0.000969605
miRNA	hsa-mir-627	41.4286	0.000755118	protein_coding	AC011236.1-001	22.0238	0.000962322
miRNA	hsa-mir-616	40.7381	0.000742533	protein_coding	MT-ND5-201	21.9048	0.00095712
protein_coding	AC130324.1-001	40.1905	0.000732551	miRNA	hsa-mir-194-2	21.8571	0.00095504
tRNA	tRNA-Gly-GCC-1-1	40.119	0.000731249	other_TMapped	ENST00000384147.1	21.7143	0.000948798
tRNA	tRNA-Leu-TAG-3-1	40.0952	0.000730815	miRNA	hsa-mir-18b	21.619	0.000944636
other_TMapped	ENST00000578159.1	40.0714	0.000730381	tRNA	tRNA-Gly-CCC-1-1	21.4762	0.000938394
protein_coding	RP11-312N17.3-003	39.8571	0.000726476	protein_coding	AC080089.1-002	21.4762	0.000938394
miRNA	hsa-mir-183	39.7619	0.00072474	protein_coding	RP11-39C2.1-003	21.4286	0.000936313
piRNA	hsa_piR_020364|gb|DQ597971|Homo_sapiens	39.7143	0.000723872	other_TMapped	ENST00000363745.1	21.381	0.000934233
YRNA	RNY4P25-201	39.619	0.000722136	other_TMapped	ENST00000387421.1	21.3571	0.000933192
protein_coding	RP11-823O21.1-005	39.5476	0.000720834	miRNA	hsa-mir-497	21.3095	0.000931112
other_TMapped	ENST00000387365.1	39.4286	0.000718664	other_TMapped	ENST00000602361.1	21.2619	0.000929031
protein_coding	AC074130.2-001	39.381	0.000717796	miRNA	hsa-mir-9-2	21	0.000917587
protein_coding	RP11-29B2.2-002	39	0.000710853	protein_coding	AC106763.1-002	20.9048	0.000913426
other_TMapped	ENST00000506329.2	38.8095	0.000707381	other_TMapped	ENST00000458902.1	20.881	0.000912385
other_TMapped	ENST00000567327.1	38.6667	0.000704777	protein_coding	RP11-420A6.1-001	20.8571	0.000911345
protein_coding	Z84721.5-006	38.5238	0.000702173	miRNA	hsa-mir-5189	20.8333	0.000910305
other_TMapped	ENST00000412740.6	38.5	0.000701739	protein_coding	AC005082.9-008	20.7619	0.000907184
tRNA	tRNA-Ser-TGA-1-1	38.3095	0.000698267	miRNA	hsa-mir-4286	20.7381	0.000906143
protein_coding	AC142472.3-001	38.119	0.000694795	protein_coding	RP11-69I17.1-001	20.6429	0.000901982
miRNA	hsa-mir-1976	37.5952	0.000685248	miRNA	hsa-mir-205	20.6429	0.000901982
protein_coding	AC003005.3-005	37.5238	0.000683946	tRNA	tRNA-Leu-AAG-4-1	20.619	0.000900942
protein_coding	AC104389.17-004	37.4286	0.00068221	protein_coding	RP11-315I20.5-001	20.5714	0.000898861
protein_coding	AC093401.1-001	37.4286	0.00068221	piRNA	hsa_piR_004987|gb|DQ576872|Homo_sapiens	20.4524	0.000893659
other_TMapped	ENST00000363314.1	37.3571	0.000680908	protein_coding	AC090582.4-018	20.4286	0.000892619
protein_coding	AC104389.17-001	37.1429	0.000677002	protein_coding	RP11-837J7.2-010	20.3095	0.000887417
protein_coding	RP11-762B21.4-027	37.0238	0.000674833	other_TMapped	ENST00000511920.1	20.1905	0.000882215
other_TMapped	ENST00000504799.1	36.9286	0.000673097	tRNA	tRNA-Lys-TTT-3-1	20.1667	0.000881175
miRNA	hsa-mir-190b	36.7143	0.000669191	other_TMapped	ENST00000469617.3	20.1429	0.000880135
miRNA	hsa-mir-6721	36.6667	0.000668323	other_TMapped	ENST00000362698.1	20.1429	0.000880135
piRNA	hsa_piR_020828|gb|DQ598675|Homo_sapiens	36.619	0.000667455	protein_coding	RP11-90L20.4-001	20.0238	0.000874933
miRNA	hsa-mir-193a	36.4048	0.000663549	other_TMapped	ENST00000378256.3	19.9048	0.000869731
piRNA	hsa_piR_016742|gb|DQ593049|Homo_sapiens	36.1905	0.000659643	piRNA	hsa_piR_016945|gb|DQ593356|Homo_sapiens	19.881	0.000868691
miRNA	hsa-mir-34a	36.1429	0.000658775	other_TMapped	ENST00000467525.5	19.7857	0.000864529
miRNA	hsa-mir-4772	36.119	0.000658341	other_TMapped	ENST00000387405.1	19.5714	0.000855166
protein_coding	CTD-2644F13.1-001	35.9524	0.000655304	other_TMapped	ENST00000387392.1	19.5476	0.000854126
other_TMapped	ENST00000384770.1	35.9048	0.000654436	protein_coding	LA16c-390E6.1-002	19.2143	0.000839561
other_TMapped	ENST00000469617.3	35.8095	0.0006527	protein_coding	LL0XNC01-136G2.2-001	19.1905	0.000838521
protein_coding	RP11-203M5.5-003	35.7857	0.000652266	miRNA	hsa-mir-11401	19.1905	0.000838521
other_TMapped	ENST00000460343.5	35.7857	0.000652266	protein_coding	AC011944.1-012	19.1905	0.000838521
other_TMapped	ENST00000449439.1	35.7619	0.000651832	protein_coding	AC114766.1-008	19.119	0.0008354
tRNA	tRNA-Val-TAC-3-1	35.7143	0.000650964	other_TMapped	ENST00000459091.1	18.9524	0.000828117
miRNA	hsa-mir-6513	35.5238	0.000647492	miRNA	hsa-mir-1255a	18.8571	0.000823956
tRNA	tRNA-Arg-CCG-2-1	34.881	0.000635775	other_TMapped	ENST00000455567.1	18.8095	0.000821875
miRNA	hsa-mir-874	34.6429	0.000631435	protein_coding	RP11-18O13.1-004	18.619	0.000813552
protein_coding	RP11-89F17.2-001	34.5	0.000628831	other_TMapped	ENST00000362883.1	18.4286	0.00080523
other_TMapped	ENST00000451853.1	34.0238	0.000620152	miRNA	hsa-mir-6803	18.3571	0.000802108
other_TMapped	ENST00000453187.1	33.5714	0.000611906	other_TMapped	ENST00000384770.1	18.3333	0.000801068
protein_coding	AC124916.10-001	33.5238	0.000611038	miRNA	hsa-mir-129-1	18.2381	0.000796907
other_TMapped	ENST00000443316.2	33.4524	0.000609736	protein_coding	AC005933.2-003	18.0952	0.000790665
protein_coding	RP11-11K16.4-001	33.1429	0.000604094	protein_coding	AC104389.17-001	18.0476	0.000788584
miRNA	hsa-mir-2277	33.0714	0.000602793	protein_coding	RP1-179N16.4-001	18.0238	0.000787544
tRNA	tRNA-Thr-TGT-2-1	33	0.000601491	tRNA	tRNA-Tyr-GTA-1-1	17.9048	0.000782342
protein_coding	MT-ND6-201	32.9524	0.000600623	other_TMapped	ENST00000363899.1	17.9048	0.000782342
tRNA	tRNA-Val-TAC-1-2	32.7619	0.000597151	protein_coding	AC005944.1-004	17.9048	0.000782342
piRNA	hsa_piR_005019|gb|DQ576918|Homo_sapiens	32.619	0.000594547	miRNA	hsa-mir-494	17.8095	0.00077818
other_TMapped	ENST00000515924.1	32.5714	0.000593679	other_TMapped	ENST00000364300.1	17.7857	0.00077714
protein_coding	MT-ND4-201	32.1429	0.000585867	piRNA	hsa_piR_021190|gb|DQ599117|Homo_sapiens	17.7381	0.000775059
protein_coding	RP11-392P7.4-001	32.0238	0.000583698	other_TMapped	ENST00000516611.1	17.6905	0.000772979
protein_coding	AC105094.1-001	32	0.000583264	protein_coding	AC040162.22-012	17.6905	0.000772979
piRNA	hsa_piR_016946|gb|DQ593358|Homo_sapiens	31.9524	0.000582396	tRNA	tRNA-Arg-TCG-1-1	17.6667	0.000771938
protein_coding	RP11-348N5.2-001	31.8095	0.000579792	other_TMapped	ENST00000390392.3	17.6429	0.000770898
tRNA	tRNA-Cys-GCA-21-1	31.7857	0.000579358	tRNA	tRNA-Arg-ACG-2-4	17.5714	0.000767777
miRNA	hsa-mir-1287	31.7143	0.000578056	miRNA	hsa-mir-6812	17.5714	0.000767777
miRNA	hsa-mir-5193	31.5476	0.000575018	other_TMapped	ENST00000449439.1	17.5476	0.000766737
miRNA	hsa-mir-6734	31.5238	0.000574584	protein_coding	RP11-708B6.1-001	17.5	0.000764656
tRNA	tRNA-Arg-ACG-2-4	31.2857	0.000570244	other_TMapped	ENST00000528321.1	17.4286	0.000761535
protein_coding	CTB-25B13.2-004	31.2857	0.000570244	protein_coding	AC142472.3-001	17.4048	0.000760495
miRNA	hsa-mir-7110	31.0714	0.000566339	other_TMapped	ENST00000631292.1	17.3571	0.000758414
miRNA	hsa-mir-29b-1	31	0.000565037	other_TMapped	ENST00000595789.5	17.3571	0.000758414
other_TMapped	ENST00000595789.5	30.8095	0.000561565	miRNA	hsa-mir-1-1	17.3333	0.000757374
miRNA	hsa-mir-4742	30.6905	0.000559395	miRNA	hsa-mir-3187	17.2619	0.000754252
protein_coding	RP1-257A7.1-005	30.381	0.000553753	miRNA	hsa-mir-1304	17.2619	0.000754252
protein_coding	AC108476.2-003	30.0476	0.000547678	tRNA	tRNA-Pro-TGG-3-1	17.2381	0.000753212
miRNA	hsa-mir-30c-1	30.0238	0.000547244	protein_coding	RP11-315I20.11-001	17.0238	0.000743849
tRNA	tRNA-Lys-CTT-1-2	30	0.00054681	protein_coding	MT-CO2-201	16.9524	0.000740728
tRNA	tRNA-His-GTG-1-1	29.8095	0.000543338	miRNA	hsa-mir-6516	16.9048	0.000738647
protein_coding	RP11-598F7.2-002	29.8095	0.000543338	protein_coding	AC099539.1-002	16.6429	0.000727203
miRNA	hsa-mir-548l	29.7619	0.00054247	protein_coding	CTD-2036P10.1-001	16.5	0.000720961
protein_coding	AC078834.6-007	29.7619	0.00054247	piRNA	hsa_piR_000794|gb|DQ570992|Homo_sapiens	16.4524	0.000718881
miRNA	hsa-mir-651	29.4524	0.000536828	protein_coding	AC018731.1-001	16.4286	0.00071784
protein_coding	RP11-904M10.4-001	29.3333	0.000534658	protein_coding	RP11-466F5.2-001	16.381	0.00071576
piRNA	hsa_piR_004987|gb|DQ576872|Homo_sapiens	29.3095	0.000534224	tRNA	tRNA-Thr-TGT-2-1	16.3571	0.000714719
protein_coding	KB-1615E4.4-002	29.0952	0.000530319	protein_coding	CTC-338M12.12-017	16.2857	0.000711598
miRNA	hsa-mir-320b-2	29.0714	0.000529885	miRNA	hsa-mir-496	16.119	0.000704316
protein_coding	AC125435.1-003	28.8095	0.000525111	tRNA	tRNA-Phe-GAA-1-6	16.0952	0.000703275
piRNA	hsa_piR_004307|gb|DQ575881|Homo_sapiens	28.6905	0.000522941	miRNA	hsa-mir-377	16.0476	0.000701195
other_TMapped	ENST00000364300.1	28.6667	0.000522507	miRNA	hsa-mir-190a	16.0476	0.000701195
other_TMapped	ENST00000384621.1	28.5952	0.000521205	piRNA	hsa_piR_005019|gb|DQ576918|Homo_sapiens	15.9762	0.000698074
tRNA	tRNA-Lys-TTT-3-1	28.5	0.000519469	other_TMapped	ENST00000363179.1	15.9524	0.000697033
miRNA	hsa-mir-1229	28.4762	0.000519035	tRNA	tRNA-Ser-TGA-1-1	15.9286	0.000695993
piRNA	hsa_piR_019949|gb|DQ597397|Homo_sapiens	28.4524	0.000518601	miRNA	hsa-mir-6859-4	15.881	0.000693912
protein_coding	RP4-674K6.1-010	28.3571	0.000516865	other_TMapped	ENST00000390378.1	15.881	0.000693912
protein_coding	AC093861.1-001	28.3571	0.000516865	protein_coding	RP11-691N7.5-001	15.8571	0.000692872
tRNA	tRNA-Ser-CGA-4-1	28.2619	0.000515129	miRNA	hsa-mir-34a	15.8571	0.000692872
protein_coding	RP11-161A14.2-001	28.1667	0.000513394	miRNA	hsa-mir-6729	15.619	0.000682468
other_TMapped	ENST00000606622.1	27.9286	0.000509054	miRNA	hsa-mir-7854	15.5714	0.000680388
other_TMapped	ENST00000410949.1	27.9048	0.00050862	other_TMapped	ENST00000420273.2	15.5	0.000677267
tRNA	tRNA-Leu-CAA-3-1	27.7857	0.00050645	other_TMapped	ENST00000363624.1	15.5	0.000677267
tRNA	tRNA-Ile-AAT-1-1	27.7619	0.000506016	tRNA	tRNA-Val-TAC-2-1	15.4524	0.000675186
miRNA	hsa-mir-380	27.1905	0.0004956	miRNA	hsa-mir-6793	15.4286	0.000674146
protein_coding	MT-ND2-201	27.119	0.000494299	miRNA	hsa-mir-556	15.4048	0.000673105
miRNA	hsa-mir-497	27.119	0.000494299	miRNA	hsa-mir-4511	15.4048	0.000673105
protein_coding	AC104135.1-002	27.0714	0.000493431	other_TMapped	ENST00000364596.1	15.2381	0.000665823
miRNA	hsa-mir-296	26.9524	0.000491261	tRNA	tRNA-Asp-GTC-2-1	15.1905	0.000663742
protein_coding	AC018890.3-001	26.881	0.000489959	miRNA	hsa-mir-301b	15.0714	0.00065854
tRNA	tRNA-Val-AAC-2-1	26.6667	0.000486053	protein_coding	RP11-297K8.6-001	15.0476	0.0006575
miRNA	hsa-mir-3605	26.5	0.000483015	tRNA	tRNA-Cys-GCA-10-1	14.9286	0.000652298
miRNA	hsa-mir-542	26.4762	0.000482581	miRNA	hsa-mir-6891	14.9048	0.000651258
miRNA	hsa-mir-887	26.3333	0.000479977	miRNA	hsa-mir-3155b	14.8571	0.000649177
miRNA	hsa-mir-125b-2	26.1905	0.000477374	other_TMapped	ENST00000476609.1	14.8095	0.000647097
other_TMapped	ENST00000508752.1	26.0714	0.000475204	tRNA	tRNA-Arg-CCG-2-1	14.7143	0.000642935
tRNA	tRNA-Cys-GCA-1-1	25.9762	0.000473468	miRNA	hsa-mir-212	14.7143	0.000642935
protein_coding	RP11-837J7.2-004	25.9524	0.000473034	protein_coding	AC093616.2-001	14.6429	0.000639814
YRNA	RNY1P11-201	25.9286	0.0004726	other_TMapped	ENST00000363548.1	14.619	0.000638774
miRNA	hsa-mir-3679	25.881	0.000471732	piRNA	hsa_piR_020364|gb|DQ597971|Homo_sapiens	14.5952	0.000637733
miRNA	hsa-mir-1294	25.7381	0.000469128	protein_coding	RP6-59H18.3-001	14.5	0.000633572
miRNA	hsa-mir-3529	25.7143	0.000468694	other_TMapped	ENST00000602522.1	14.4762	0.000632532
other_TMapped	ENST00000626826.1	25.7143	0.000468694	miRNA	hsa-mir-4772	14.4524	0.000631491
other_TMapped	ENST00000362487.1	25.4286	0.000463486	miRNA	hsa-mir-1296	14.4524	0.000631491
miRNA	hsa-mir-5187	25.3571	0.000462184	tRNA	tRNA-Ala-TGC-3-2	14.4286	0.000630451
YRNA	RNY3P1-201	25.3095	0.000461316	protein_coding	AC090260.5-001	14.4286	0.000630451
miRNA	hsa-mir-548ag-2	25.1429	0.000458279	miRNA	hsa-mir-1233-2	14.381	0.00062837
miRNA	hsa-mir-5189	25.119	0.000457845	other_TMapped	ENST00000636161.1	14.3571	0.00062733
miRNA	hsa-mir-4662a	25.119	0.000457845	tRNA	tRNA-Cys-GCA-6-1	14.3333	0.00062629
miRNA	hsa-mir-212	25.0714	0.000456977	tRNA	tRNA-Val-CAC-14-1	14.2619	0.000623169
miRNA	hsa-mir-1247	25.0476	0.000456543	protein_coding	RP11-641I15.1-005	14.2619	0.000623169
miRNA	hsa-mir-6516	25.0238	0.000456109	miRNA	hsa-mir-29b-1	14.2619	0.000623169
other_TMapped	ENST00000619225.1	24.9524	0.000454807	miRNA	hsa-mir-4662a	14.2143	0.000621088
tRNA	tRNA-Gln-CTG-2-1	24.9286	0.000454373	piRNA	hsa_piR_016735|gb|DQ593039|Homo_sapiens	14.1667	0.000619007
other_TMapped	ENST00000462349.5	24.8333	0.000452637	miRNA	hsa-mir-200a	14.0714	0.000614846
other_TMapped	ENST00000410669.1	24.6905	0.000450033	other_TMapped	ENST00000619225.1	14.0714	0.000614846
protein_coding	Z84721.6-006	24.3571	0.000443957	tRNA	tRNA-Met-CAT-1-1	13.881	0.000606523
other_TMapped	ENST00000448737.1	24.2619	0.000442221	piRNA	hsa_piR_004307|gb|DQ575881|Homo_sapiens	13.881	0.000606523
protein_coding	AC040162.22-011	24	0.000437448	other_TMapped	ENST00000491451.3	13.8095	0.000603402
other_TMapped	ENST00000459189.1	23.9286	0.000436146	other_TMapped	ENST00000365663.1	13.7381	0.000600281
protein_coding	MT-CO1-201	23.9048	0.000435712	other_TMapped	ENST00000436670.1	13.6905	0.0005982
other_TMapped	ENST00000384138.1	23.8333	0.00043441	protein_coding	AC003005.3-005	13.619	0.000595079
protein_coding	AP000442.2-001	23.8095	0.000433976	miRNA	hsa-mir-199b	13.5714	0.000592998
other_TMapped	ENST00000487558.1	23.7619	0.000433108	protein_coding	AC093414.6-001	13.5238	0.000590918
protein_coding	AC091171.3-017	23.6429	0.000430938	piRNA	hsa_piR_020496|gb|DQ598175|Homo_sapiens	13.4286	0.000586756
piRNA	hsa_piR_016970|gb|DQ593407|Homo_sapiens	23.5714	0.000429636	other_TMapped	ENST00000556078.1	13.381	0.000584676
tRNA	tRNA-Ser-TGA-3-1	23.5476	0.000429202	piRNA	hsa_piR_016946|gb|DQ593358|Homo_sapiens	13.3095	0.000581555
other_TMapped	ENST00000364950.1	23.5	0.000428334	tRNA	tRNA-Trp-CCA-2-1	13.2857	0.000580514
miRNA	hsa-mir-1179	23.4286	0.000427032	piRNA	hsa_piR_021214|gb|DQ599147|Homo_sapiens	13.2857	0.000580514
miRNA	hsa-mir-301b	23.4048	0.000426598	tRNA	tRNA-Arg-TCT-1-1	13.1905	0.000576353
miRNA	hsa-mir-450b	23.381	0.000426164	miRNA	hsa-mir-627	13.1905	0.000576353
other_TMapped	ENST00000585366.1	23.2381	0.00042356	protein_coding	AC012184.7-001	13.1667	0.000575313
other_TMapped	ENST00000643426.1	22.9524	0.000418353	miRNA	hsa-mir-1224	13.119	0.000573232
protein_coding	RP11-712B9.1-003	22.8571	0.000416617	protein_coding	RP11-203M5.5-002	13.0476	0.000570111
other_TMapped	ENST00000377178.3	22.8571	0.000416617	other_TMapped	ENST00000365053.1	13.0476	0.000570111
tRNA	tRNA-SeC-TCA-1-1	22.619	0.000412277	tRNA	tRNA-Leu-TAG-3-1	13.0238	0.00056907
other_TMapped	ENST00000628531.2	22.5952	0.000411843	other_TMapped	ENST00000633719.1	13	0.00056803
protein_coding	RP11-294J22.1-001	22.5	0.000410107	other_TMapped	ENST00000643426.1	12.9524	0.000565949
miRNA	hsa-mir-218-1	22.4762	0.000409673	tRNA	tRNA-Cys-GCA-4-1	12.8571	0.000561788
protein_coding	AL137230.3-001	22.4762	0.000409673	other_TMapped	ENST00000403963.5	12.8571	0.000561788
tRNA	tRNA-Tyr-GTA-1-1	22.3095	0.000406635	other_TMapped	ENST00000508752.1	12.8333	0.000560748
miRNA	hsa-mir-1299	22.1905	0.000404466	miRNA	hsa-mir-4685	12.7619	0.000557627
piRNA	hsa_piR_016745|gb|DQ593052|Homo_sapiens	22.0238	0.000401428	other_TMapped	ENST00000461075.1	12.7619	0.000557627
protein_coding	CTC-458I2.1-001	21.9762	0.00040056	tRNA	tRNA-Gly-CCC-1-2	12.7381	0.000556586
other_TMapped	ENST00000510841.1	21.9524	0.000400126	protein_coding	AL773603.10-003	12.7143	0.000555546
miRNA	hsa-mir-199b	21.9286	0.000399692	miRNA	hsa-mir-6802	12.6667	0.000553465
other_TMapped	ENST00000384093.1	21.8571	0.00039839	other_TMapped	ENST00000462488.1	12.6429	0.000552425
protein_coding	RP11-474L7.5-001	21.7619	0.000396654	protein_coding	AC103858.1-003	12.6429	0.000552425
tRNA	tRNA-Arg-TCG-1-1	21.7381	0.00039622	protein_coding	RP11-3D4.1-009	12.5952	0.000550344
miRNA	hsa-mir-450a-2	21.7381	0.00039622	protein_coding	RP11-294J22.1-001	12.5714	0.000549304
tRNA	tRNA-Asp-GTC-2-1	21.7143	0.000395786	miRNA	hsa-mir-6515	12.5714	0.000549304
other_TMapped	ENST00000391267.1	21.7143	0.000395786	tRNA	tRNA-Cys-GCA-16-1	12.5476	0.000548264
protein_coding	AL773603.10-003	21.6905	0.000395352	protein_coding	AC068657.1-001	12.5476	0.000548264
other_TMapped	ENST00000516177.1	21.5238	0.000392314	protein_coding	RP11-148L5.2-001	12.4524	0.000544102
other_TMapped	ENST00000383869.1	21.5	0.00039188	miRNA	hsa-mir-6514	12.4524	0.000544102
other_TMapped	ENST00000365138.1	21.5	0.00039188	other_TMapped	ENST00000494995.5	12.4048	0.000542021
miRNA	hsa-mir-551b	21.4762	0.000391446	protein_coding	AC105314.2-001	12.381	0.000540981
protein_coding	XXbac-BPG1H2.1-001	21.4524	0.000391012	protein_coding	RP11-114B6.1-001	12.3571	0.000539941
protein_coding	AC113189.4-002	21.2381	0.000387107	other_TMapped	ENST00000591467.1	12.3571	0.000539941
miRNA	hsa-mir-196a-1	21.1667	0.000385805	miRNA	hsa-mir-6877	12.2857	0.00053682
protein_coding	CTD-2140B24.5-001	21.1667	0.000385805	protein_coding	AC004846.4-001	12.2857	0.00053682
miRNA	hsa-mir-362	21.1429	0.000385371	protein_coding	RP4-659I19.2-002	12.2619	0.000535779
protein_coding	RP11-247I13.2-005	21.0952	0.000384503	other_TMapped	ENST00000444889.1	12.1905	0.000532658
other_TMapped	ENST00000451362.1	21	0.000382767	protein_coding	RP11-247I13.2-005	12.119	0.000529537
protein_coding	CTD-2325H11.3-001	20.9048	0.000381031	miRNA	hsa-mir-204	12.0952	0.000528497
other_TMapped	ENST00000363179.1	20.7857	0.000378861	other_TMapped	ENST00000554169.1	12	0.000524336
protein_coding	AC093414.6-001	20.7857	0.000378861	other_TMapped	ENST00000490156.1	12	0.000524336
miRNA	hsa-mir-9-3	20.7143	0.000377559	tRNA	tRNA-Ser-CGA-4-1	11.9286	0.000521214
protein_coding	AC012363.1-006	20.6905	0.000377125	miRNA	hsa-mir-668	11.9286	0.000521214
other_TMapped	ENST00000622550.2	20.6667	0.000376691	miRNA	hsa-mir-1179	11.9286	0.000521214
protein_coding	RP11-337C18.3-001	20.6429	0.000376257	miRNA	hsa-let-7a-2	11.9286	0.000521214
tRNA	tRNA-Arg-CCT-4-1	20.619	0.000375823	protein_coding	Z84721.6-001	11.9048	0.000520174
protein_coding	RP11-158H5.1-001	20.5952	0.000375389	protein_coding	AC006451.2-001	11.8095	0.000516013
piRNA	hsa_piR_001205|gb|DQ571589|Homo_sapiens	20.5952	0.000375389	miRNA	hsa-mir-196a-1	11.7381	0.000512892
miRNA	hsa-mir-548o-2	20.5714	0.000374955	tRNA	tRNA-Glu-TTC-2-1	11.6905	0.000510811
tRNA	tRNA-Gly-GCC-2-1	20.5238	0.000374087	tRNA	tRNA-Gln-CTG-5-1	11.6905	0.000510811
other_TMapped	ENST00000607097.1	20.4048	0.000371917	other_TMapped	ENST00000364346.1	11.6905	0.000510811
tRNA	tRNA-Glu-TTC-2-1	20.3571	0.000371049	tRNA	tRNA-Gly-GCC-1-1	11.6667	0.000509771
miRNA	hsa-mir-3613	20.3095	0.000370181	miRNA	hsa-mir-9-3	11.6429	0.00050873
miRNA	hsa-mir-4646	20.2619	0.000369314	protein_coding	RP11-645N11.2-002	11.619	0.00050769
protein_coding	CTC-338M12.12-017	20	0.00036454	miRNA	hsa-mir-2277	11.619	0.00050769
miRNA	hsa-mir-641	19.9524	0.000363672	miRNA	hsa-mir-96	11.5714	0.000505609
protein_coding	RP11-353D5.1-004	19.9048	0.000362804	other_TMapped	ENST00000363171.1	11.5714	0.000505609
tRNA	tRNA-Val-CAC-5-1	19.881	0.00036237	protein_coding	XXbac-BPG181M17.2-002	11.5238	0.000503529
other_TMapped	ENST00000541739.6	19.8571	0.000361936	protein_coding	AC139452.3-001	11.5	0.000502488
protein_coding	RP11-147L20.3-001	19.6667	0.000358464	miRNA	hsa-mir-4687	11.4762	0.000501448
tRNA	tRNA-Lys-TTT-4-1	19.5952	0.000357162	protein_coding	AC105094.1-001	11.4524	0.000500407
other_TMapped	ENST00000597346.1	19.5238	0.00035586	tRNA	tRNA-Lys-TTT-4-1	11.4048	0.000498327
other_TMapped	ENST00000546601.1	19.5238	0.00035586	miRNA	hsa-mir-183	11.4048	0.000498327
other_TMapped	ENST00000610674.1	19.5	0.000355426	protein_coding	CTC-241F20.5-003	11.4048	0.000498327
protein_coding	RP3-468K18.1-001	19.2381	0.000350653	protein_coding	RP3-429G5.4-001	11.381	0.000497286
miRNA	hsa-mir-193b	19.2381	0.000350653	protein_coding	RP5-1050D4.1-002	11.2619	0.000492085
protein_coding	ABC13-47488600E17.1-002	19.2381	0.000350653	miRNA	hsa-mir-1237	11.2619	0.000492085
protein_coding	RP11-600N23.2-022	19.1905	0.000349785	protein_coding	RP11-837J7.2-004	11.2381	0.000491044
miRNA	hsa-mir-151b	19.1905	0.000349785	miRNA	hsa-mir-486-1	11.2143	0.000490004
protein_coding	AC105903.1-001	19.1905	0.000349785	other_TMapped	ENST00000364678.1	11.1905	0.000488964
protein_coding	RP11-49I4.1-001	19.1667	0.000349351	miRNA	hsa-mir-6882	11.1667	0.000487923
miRNA	hsa-mir-6810	19	0.000346313	protein_coding	MT-ND4-201	11.1429	0.000486883
piRNA	hsa_piR_010894|gb|DQ584698|Homo_sapiens	18.9762	0.000345879	other_TMapped	ENST00000426112.1	11.1429	0.000486883
miRNA	hsa-mir-502	18.9286	0.000345011	protein_coding	RP11-150D20.2-004	11.0952	0.000484802
miRNA	hsa-mir-548q	18.8571	0.000343709	tRNA	tRNA-Cys-GCA-17-1	11.0714	0.000483762
miRNA	hsa-mir-885	18.8095	0.000342841	other_TMapped	ENST00000606420.1	11.0714	0.000483762
miRNA	hsa-mir-939	18.7619	0.000341973	other_TMapped	ENST00000448031.1	11.0714	0.000483762
piRNA	hsa_piR_021190|gb|DQ599117|Homo_sapiens	18.7381	0.000341539	protein_coding	AC025448.5-007	11.0476	0.000482722
other_TMapped	ENST00000487309.3	18.6429	0.000339803	miRNA	hsa-mir-1299	10.9048	0.000476479
tRNA	tRNA-Ile-AAT-12-1	18.5952	0.000338935	miRNA	hsa-mir-362	10.8571	0.000474399
miRNA	hsa-mir-642b	18.4286	0.000335897	tRNA	tRNA-Cys-GCA-1-1	10.8333	0.000473358
protein_coding	RP11-69I17.1-001	18.381	0.000335029	other_TMapped	ENST00000383884.1	10.7857	0.000471278
miRNA	hsa-mir-205	18.3333	0.000334161	protein_coding	ARMC8-223	10.7619	0.000470237
other_TMapped	ENST00000391033.1	18.3333	0.000334161	protein_coding	RP11-771O11.3-001	10.7381	0.000469197
tRNA	tRNA-Pro-TGG-2-1	18.3095	0.000333727	other_TMapped	ENST00000564593.1	10.7381	0.000469197
miRNA	hsa-mir-3143	18.2857	0.000333294	protein_coding	CTD-2644F13.1-001	10.6905	0.000467116
miRNA	hsa-mir-6515	18.119	0.000330256	miRNA	hsa-mir-215	10.6667	0.000466076
other_TMapped	ENST00000536317.5	18.0714	0.000329388	tRNA	tRNA-Val-CAC-5-1	10.5238	0.000459834
other_TMapped	ENST00000417432.1	18.0238	0.00032852	other_TMapped	ENST00000443093.2	10.5	0.000458794
protein_coding	CTC-241F20.5-003	18.0238	0.00032852	other_TMapped	ENST00000383869.1	10.4524	0.000456713
miRNA	hsa-mir-378c	17.9762	0.000327652	tRNA	tRNA-iMet-CAT-2-1	10.4286	0.000455673
tRNA	tRNA-Arg-TCT-1-1	17.9048	0.00032635	other_TMapped	ENST00000364409.1	10.381	0.000453592
tRNA	tRNA-Met-CAT-4-3	17.8571	0.000325482	tRNA	tRNA-Lys-TTT-3-5	10.3333	0.000451511
protein_coding	RP11-411B6.1-002	17.8571	0.000325482	miRNA	hsa-mir-376b	10.3333	0.000451511
other_TMapped	ENST00000516935.1	17.8571	0.000325482	protein_coding	CTA-228A9.2-002	10.3333	0.000451511
protein_coding	CTD-3199J23.1-022	17.8333	0.000325048	miRNA	hsa-mir-7849	10.3095	0.000450471
protein_coding	AC005082.9-008	17.7857	0.00032418	protein_coding	IKZF5-205	10.2857	0.00044943
tRNA	tRNA-Leu-CAG-1-7	17.7381	0.000323312	protein_coding	CTB-14D10.3-001	10.2857	0.00044943
miRNA	hsa-mir-4659b	17.7381	0.000323312	protein_coding	AP000442.2-001	10.2381	0.00044735
other_TMapped	ENST00000387439.1	17.5714	0.000320274	protein_coding	AC013701.1-003	10.2381	0.00044735
miRNA	hsa-mir-33a	17.5	0.000318972	piRNA	hsa_piR_019914|gb|DQ597347|Homo_sapiens	10.2143	0.000446309
tRNA	tRNA-Ser-CGA-3-1	17.4762	0.000318538	miRNA	hsa-mir-450a-2	10.1667	0.000444229
protein_coding	AC074212.7-019	17.4762	0.000318538	other_TMapped	ENST00000559400.1	10.1667	0.000444229
miRNA	hsa-mir-6747	17.4524	0.000318104	other_TMapped	ENST00000510711.5	10.1429	0.000443188
other_TMapped	ENST00000391023.1	17.3095	0.0003155	protein_coding	RP11-212B22.1-002	10.0476	0.000439027
tRNA	tRNA-Ser-GCT-3-1	17.2619	0.000314633	miRNA	hsa-mir-4440	10	0.000436946
protein_coding	RP11-371I20.1-001	17.2619	0.000314633	other_TMapped	ENST00000410717.1	9.95238	0.000434866
other_TMapped	ENST00000384446.1	17.2619	0.000314633	miRNA	hsa-mir-6513	9.92857	0.000433825
other_TMapped	ENST00000580533.1	17.2143	0.000313765	protein_coding	RP11-314N13.7-003	9.88095	0.000431745
miRNA	hsa-mir-320c-2	17.1905	0.000313331	miRNA	hsa-mir-6861	9.88095	0.000431745
protein_coding	CTC-425F1.3-001	17.1905	0.000313331	protein_coding	CAMK2D-201	9.88095	0.000431745
protein_coding	RP11-99I12.1-005	17.0952	0.000311595	piRNA	hsa_piR_001311|gb|DQ571812|Homo_sapiens	9.85714	0.000430704
miRNA	hsa-mir-299	16.9762	0.000309425	other_TMapped	ENST00000571632.5	9.83333	0.000429664
piRNA	hsa_piR_016735|gb|DQ593039|Homo_sapiens	16.9762	0.000309425	other_TMapped	ENST00000515982.1	9.83333	0.000429664
protein_coding	RP11-550P17.3-001	16.9524	0.000308991	protein_coding	SETDB2-202	9.80952	0.000428623
protein_coding	RP11-284N8.1-002	16.9524	0.000308991	protein_coding	PDE5A-203	9.78571	0.000427583
tRNA	tRNA-Leu-TAA-1-1	16.9048	0.000308123	miRNA	hsa-mir-1247	9.78571	0.000427583
protein_coding	AC093616.2-001	16.9048	0.000308123	other_TMapped	ENST00000508319.1	9.78571	0.000427583
protein_coding	RP11-727A23.3-001	16.8571	0.000307255	other_TMapped	ENST00000516869.1	9.7381	0.000425502
tRNA	tRNA-Ala-AGC-7-1	16.8095	0.000306387	other_TMapped	ENST00000475491.1	9.7381	0.000425502
miRNA	hsa-mir-668	16.8095	0.000306387	tRNA	tRNA-Gly-CCC-2-1	9.71429	0.000424462
miRNA	hsa-mir-1304	16.7143	0.000304651	protein_coding	CTC-471J1.6-002	9.69048	0.000423422
other_TMapped	ENST00000362883.1	16.5476	0.000301613	protein_coding	RP3-400N23.7-003	9.66667	0.000422381
other_TMapped	ENST00000569858.1	16.5238	0.000301179	other_TMapped	ENST00000410482.1	9.66667	0.000422381
other_TMapped	ENST00000523472.1	16.5238	0.000301179	tRNA	tRNA-Ser-GCT-1-1	9.64286	0.000421341
other_TMapped	ENST00000528321.1	16.5	0.000300745	miRNA	hsa-mir-6749	9.52381	0.000416139
other_TMapped	ENST00000383972.1	16.4524	0.000299877	piRNA	hsa_piR_001205|gb|DQ571589|Homo_sapiens	9.52381	0.000416139
miRNA	hsa-mir-486-1	16.4048	0.000299009	miRNA	hsa-mir-656	9.5	0.000415099
other_TMapped	ENST00000574245.1	16.381	0.000298575	miRNA	hsa-mir-548f-1	9.47619	0.000414059
miRNA	hsa-mir-6803	16.3333	0.000297707	other_TMapped	ENST00000606809.1	9.47619	0.000414059
protein_coding	U47924.23-006	16.2619	0.000296406	protein_coding	DROSHA-202	9.45238	0.000413018
miRNA	hsa-mir-135a-1	16.119	0.000293802	other_TMapped	ENST00000509932.2	9.40476	0.000410938
miRNA	hsa-mir-1226	16.119	0.000293802	protein_coding	RP11-43N16.1-001	9.38095	0.000409897
piRNA	hsa_piR_021214|gb|DQ599147|Homo_sapiens	16.0238	0.000292066	protein_coding	AC005321.1-005	9.35714	0.000408857
piRNA	hsa_piR_019521|gb|DQ596805|Homo_sapiens	15.9524	0.000290764	miRNA	hsa-mir-642b	9.33333	0.000407817
other_TMapped	ENST00000411039.1	15.9524	0.000290764	other_TMapped	ENST00000594655.5	9.30952	0.000406776
protein_coding	CTC-326K19.5-003	15.9524	0.000290764	other_TMapped	ENST00000386347.1	9.30952	0.000406776
YRNA	RNY4P29-201	15.9286	0.00029033	protein_coding	AC004702.1-018	9.28571	0.000405736
piRNA	hsa_piR_009051|gb|DQ582264|Homo_sapiens	15.8571	0.000289028	protein_coding	RP11-260H5__B.1-002	9.2381	0.000403655
other_TMapped	ENST00000387429.1	15.8333	0.000288594	miRNA	hsa-mir-548o-2	9.21429	0.000402615
other_TMapped	ENST00000469129.1	15.8095	0.00028816	miRNA	hsa-mir-6837	9.16667	0.000400534
protein_coding	RP11-362A9.1-008	15.7857	0.000287726	miRNA	hsa-mir-6511a-1	9.16667	0.000400534
miRNA	hsa-mir-636	15.7857	0.000287726	other_TMapped	ENST00000411553.3	9.14286	0.000399494
tRNA	tRNA-Arg-TCT-3-2	15.7619	0.000287292	miRNA	hsa-mir-135a-1	9.11905	0.000398453
other_TMapped	ENST00000363338.1	15.7381	0.000286858	miRNA	hsa-mir-1260b	9.11905	0.000398453
protein_coding	CTD-2231E14.1-015	15.6905	0.00028599	miRNA	hsa-mir-548at	9.07143	0.000396373
piRNA	hsa_piR_020541|gb|DQ598252|Homo_sapiens	15.619	0.000284688	miRNA	hsa-mir-548ag-2	9.07143	0.000396373
protein_coding	AC012169.1-001	15.619	0.000284688	protein_coding	RP13-820C6.3-001	9.04762	0.000395332
other_TMapped	ENST00000420042.1	15.5952	0.000284254	protein_coding	RP11-463O12.4-004	9.02381	0.000394292
miRNA	hsa-mir-664b	15.5	0.000282518	protein_coding	MT-CO1-201	9.02381	0.000394292
other_TMapped	ENST00000443504.1	15.4762	0.000282084	protein_coding	RP1-68O2.1-001	9	0.000393252
other_TMapped	ENST00000629441.1	15.381	0.000280348	protein_coding	RP11-712B9.1-003	8.97619	0.000392211
protein_coding	AC006369.1-001	15.3333	0.00027948	other_TMapped	ENST00000525013.1	8.97619	0.000392211
protein_coding	RP11-23J9.2-001	15.1429	0.000276009	protein_coding	RP11-923C2.1-002	8.95238	0.000391171
miRNA	hsa-mir-320e	15.1429	0.000276009	protein_coding	RP11-498E2.1-001	8.95238	0.000391171
protein_coding	RP11-141E21.1-001	15.119	0.000275575	protein_coding	RP4-758N20.2-001	8.92857	0.000390131
other_TMapped	ENST00000439898.1	15.0952	0.000275141	miRNA	hsa-mir-6758	8.92857	0.000390131
protein_coding	RP11-433J6.3-001	15.0714	0.000274707	other_TMapped	ENST00000522827.1	8.92857	0.000390131
tRNA	tRNA-Gly-TCC-2-6	15.0238	0.000273839	protein_coding	AC006547.12-001	8.90476	0.00038909
protein_coding	CTA-256D12.3-010	15.0238	0.000273839	protein_coding	RP1-54B20.8-002	8.88095	0.00038805
miRNA	hsa-mir-6514	14.7857	0.000269499	miRNA	hsa-mir-501	8.83333	0.000385969
miRNA	hsa-mir-582	14.7619	0.000269065	miRNA	hsa-mir-1284	8.78571	0.000383888
tRNA	tRNA-Arg-TCT-5-1	14.6667	0.000267329	other_TMapped	ENST00000590268.1	8.78571	0.000383888
protein_coding	CTD-2544E12.1-001	14.6429	0.000266895	other_TMapped	ENST00000469309.1	8.78571	0.000383888
miRNA	hsa-mir-6802	14.619	0.000266461	tRNA	tRNA-Val-TAC-1-2	8.7381	0.000381808
miRNA	hsa-mir-4685	14.5714	0.000265593	protein_coding	RP11-467L13.2-010	8.7381	0.000381808
protein_coding	RP11-452K12.1-001	14.4762	0.000263857	other_TMapped	ENST00000578067.5	8.71429	0.000380767
tRNA	tRNA-Lys-TTT-3-5	14.4524	0.000263423	other_TMapped	ENST00000439898.1	8.71429	0.000380767
other_TMapped	hsa_circ_001671	14.4048	0.000262555	other_TMapped	ENST00000363688.1	8.71429	0.000380767
piRNA	hsa_piR_017724|gb|DQ594465|Homo_sapiens	14.381	0.000262121	protein_coding	AL079303.7-002	8.66667	0.000378687
miRNA	hsa-mir-11401	14.3571	0.000261687	protein_coding	RP1-234H5.1-001	8.64286	0.000377646
miRNA	hsa-mir-3200	14.3095	0.00026082	protein_coding	AC093861.1-001	8.64286	0.000377646
protein_coding	RP11-148L5.2-001	14.2857	0.000260386	miRNA	hsa-mir-380	8.61905	0.000376606
other_TMapped	ENST00000364930.1	14.2619	0.000259952	miRNA	hsa-mir-548au	8.59524	0.000375566
miRNA	hsa-mir-940	14.2143	0.000259084	miRNA	hsa-mir-3191	8.59524	0.000375566
piRNA	hsa_piR_019825|gb|DQ597218|Homo_sapiens	14.2143	0.000259084	other_TMapped	ENST00000637770.1	8.59524	0.000375566
tRNA	tRNA-Ala-AGC-1-1	14.0714	0.00025648	other_TMapped	ENST00000602298.2	8.59524	0.000375566
other_TMapped	ENST00000403963.5	14.0476	0.000256046	tRNA	tRNA-Val-AAC-2-1	8.57143	0.000374525
tRNA	tRNA-Trp-CCA-4-1	14.0238	0.000255612	protein_coding	AC093401.1-001	8.57143	0.000374525
protein_coding	RP11-181E22.3-001	14.0238	0.000255612	miRNA	hsa-mir-937	8.54762	0.000373485
other_TMapped	ENST00000613023.1	14.0238	0.000255612	other_TMapped	ENST00000459579.1	8.54762	0.000373485
protein_coding	MT-ATP6-201	14	0.000255178	miRNA	hsa-mir-539	8.52381	0.000372445
protein_coding	RP11-102M2.1-004	13.9762	0.000254744	protein_coding	AC011372.4-009	8.5	0.000371404
other_TMapped	ENST00000363674.1	13.9524	0.00025431	other_TMapped	ENST00000532446.5	8.47619	0.000370364
other_TMapped	ENST00000633719.1	13.9286	0.000253876	miRNA	hsa-mir-320d-2	8.45238	0.000369324
protein_coding	AF233439.8-001	13.9286	0.000253876	protein_coding	AC104759.1-001	8.45238	0.000369324
miRNA	hsa-mir-491	13.8095	0.000251706	protein_coding	RP11-697H9.1-001	8.40476	0.000367243
protein_coding	ZBTB43-203	13.7619	0.000250838	miRNA	hsa-mir-6732	8.40476	0.000367243
other_TMapped	ENST00000421465.2	13.7619	0.000250838	YRNA	RNY1P13-201	8.35714	0.000365162
miRNA	hsa-mir-3127	13.7381	0.000250404	tRNA	tRNA-Ser-GCT-2-1	8.33333	0.000364122
other_TMapped	ENST00000506773.7	13.7381	0.000250404	miRNA	hsa-mir-4533	8.33333	0.000364122
other_TMapped	ENST00000473014.1	13.7143	0.00024997	miRNA	hsa-mir-499b	8.30952	0.000363082
protein_coding	RP4-768P8.1-001	13.6905	0.000249536	other_TMapped	ENST00000362534.1	8.28571	0.000362041
protein_coding	CTB-175E5.6-002	13.6905	0.000249536	miRNA	hsa-mir-758	8.2381	0.00035996
protein_coding	AC099539.1-002	13.6429	0.000248668	miRNA	hsa-mir-545	8.2381	0.00035996
tRNA	tRNA-Ile-AAT-7-1	13.619	0.000248234	protein_coding	AC005229.6-001	8.2381	0.00035996
protein_coding	RP11-708B6.1-001	13.619	0.000248234	protein_coding	RP11-328C17.1-001	8.21429	0.00035892
piRNA	hsa_piR_016984|gb|DQ593431|Homo_sapiens	13.619	0.000248234	miRNA	hsa-mir-4645	8.21429	0.00035892
protein_coding	AC120057.4-007	13.5714	0.000247366	miRNA	hsa-mir-125b-2	8.21429	0.00035892
protein_coding	RP3-493F7.3-001	13.5476	0.000246932	miRNA	hsa-mir-3188	8.19048	0.00035788
miRNA	hsa-mir-1292	13.5476	0.000246932	protein_coding	RP11-2I17.2-005	8.16667	0.000356839
miRNA	hsa-mir-4440	13.5238	0.000246498	protein_coding	RP11-531E13.1-001	8.14286	0.000355799
miRNA	hsa-mir-3158-1	13.5238	0.000246498	miRNA	hsa-mir-6805	8.14286	0.000355799
protein_coding	RP11-67H12.1-003	13.4762	0.00024563	miRNA	hsa-mir-4748	8.14286	0.000355799
protein_coding	RP11-393H10.3-001	13.4762	0.00024563	other_TMapped	ENST00000434796.5	8.14286	0.000355799
protein_coding	RP11-343K8.1-001	13.4524	0.000245196	protein_coding	RP11-432J22.4-001	8.09524	0.000353718
miRNA	hsa-mir-6793	13.4524	0.000245196	miRNA	hsa-mir-450b	8.04762	0.000351638
other_TMapped	ENST00000364044.1	13.4524	0.000245196	protein_coding	RP11-89F17.2-001	8.02381	0.000350597
other_TMapped	ENST00000442067.5	13.4286	0.000244762	other_TMapped	ENST00000442067.5	8.02381	0.000350597
piRNA	hsa_piR_008488|gb|DQ581533|Homo_sapiens	13.381	0.000243894	protein_coding	RP13-152O15.6-001	8	0.000349557
other_TMapped	ENST00000378256.3	13.3333	0.000243027	piRNA	hsa_piR_020450|gb|DQ598104|Homo_sapiens	8	0.000349557
protein_coding	CTD-2545M3.4-002	13.3333	0.000243027	miRNA	hsa-mir-1226	7.97619	0.000348517
protein_coding	CTD-2320O4.1-001	13.3333	0.000243027	other_TMapped	ENST00000569858.1	7.97619	0.000348517
other_TMapped	ENST00000516869.1	13.2857	0.000242159	other_TMapped	ENST00000512854.1	7.97619	0.000348517
protein_coding	RP11-124H7.2-003	13.2143	0.000240857	protein_coding	CTD-2231E14.1-015	7.97619	0.000348517
protein_coding	RP11-297K8.6-001	13.1905	0.000240423	miRNA	hsa-mir-6747	7.95238	0.000347476
miRNA	hsa-mir-200a	13.1905	0.000240423	miRNA	hsa-mir-582	7.92857	0.000346436
miRNA	hsa-mir-7977	13.1429	0.000239555	miRNA	hsa-mir-3143	7.92857	0.000346436
other_TMapped	ENST00000384653.1	13.1429	0.000239555	tRNA	tRNA-Leu-CAA-3-1	7.90476	0.000345396
protein_coding	AC106886.6-012	13.119	0.000239121	other_TMapped	ENST00000459584.1	7.90476	0.000345396
protein_coding	RP11-134P9.2-001	13.0952	0.000238687	protein_coding	CTB-61I7.1-002	7.90476	0.000345396
protein_coding	RP11-122A17.1-001	13.0952	0.000238687	piRNA	hsa_piR_019091|gb|DQ596211|Homo_sapiens	7.88095	0.000344355
protein_coding	RP11-983P16.1-001	13.0476	0.000237819	other_TMapped	ENST00000618872.1	7.88095	0.000344355
miRNA	hsa-mir-548ap	13.0476	0.000237819	protein_coding	RP11-111M22.1-001	7.85714	0.000343315
other_TMapped	ENST00000537212.1	13.0476	0.000237819	tRNA	tRNA-Gly-GCC-2-6	7.80952	0.000341234
other_TMapped	ENST00000391203.1	13.0476	0.000237819	other_TMapped	ENST00000610674.1	7.80952	0.000341234
protein_coding	MYH13-203	13.0238	0.000237385	protein_coding	RP11-122A17.1-001	7.78571	0.000340194
protein_coding	AC098850.2-006	13	0.000236951	protein_coding	AC005798.3-001	7.78571	0.000340194
other_TMapped	ENST00000630472.1	12.9524	0.000236083	protein_coding	AC004098.3-005	7.7381	0.000338113
piRNA	hsa_piR_005018|gb|DQ576917|Homo_sapiens	12.9048	0.000235215	piRNA	hsa_piR_017724|gb|DQ594465|Homo_sapiens	7.71429	0.000337073
protein_coding	RP11-30K9.3-004	12.8571	0.000234347	tRNA	tRNA-Ser-TGA-3-1	7.66667	0.000334992
piRNA	hsa_piR_016926|gb|DQ593325|Homo_sapiens	12.8095	0.000233479	miRNA	hsa-mir-664b	7.66667	0.000334992
protein_coding	RP1-132F22.1-001	12.7619	0.000232611	other_TMapped	ENST00000364968.1	7.66667	0.000334992
miRNA	hsa-mir-1343	12.7619	0.000232611	tRNA	tRNA-Lys-CTT-1-1	7.64286	0.000333952
piRNA	hsa_piR_016240|gb|DQ592148|Homo_sapiens	12.7381	0.000232177	protein_coding	RP1-132F22.1-001	7.64286	0.000333952
YRNA	RNY1P5-201	12.7143	0.000231743	other_TMapped	ENST00000508158.5	7.64286	0.000333952
other_TMapped	ENST00000444571.5	12.7143	0.000231743	other_TMapped	ENST00000443316.2	7.61905	0.000332911
miRNA	hsa-mir-1185-1	12.6905	0.000231309	protein_coding	AC104643.1-001	7.61905	0.000332911
piRNA	hsa_piR_019912|gb|DQ597341|Homo_sapiens	12.6667	0.000230875	piRNA	hsa_piR_020828|gb|DQ598675|Homo_sapiens	7.57143	0.000330831
other_TMapped	ENST00000475491.1	12.6667	0.000230875	tRNA	tRNA-Tyr-GTA-4-1	7.54762	0.00032979
YRNA	RNY4P34-201	12.5714	0.000229139	tRNA	tRNA-Gly-GCC-4-1	7.54762	0.00032979
other_TMapped	ENST00000358748.1	12.5238	0.000228271	miRNA	hsa-mir-1538	7.54762	0.00032979
other_TMapped	ENST00000476609.1	12.5	0.000227837	protein_coding	AC012321.2-006	7.54762	0.00032979
other_TMapped	ENST00000625783.2	12.4286	0.000226535	other_TMapped	ENST00000444770.1	7.5	0.00032771
protein_coding	XXbac-BPG1H2.4-001	12.4048	0.000226101	other_TMapped	ENST00000387314.1	7.47619	0.000326669
miRNA	hsa-mir-18b	12.4048	0.000226101	other_TMapped	ENST00000362487.1	7.47619	0.000326669
piRNA	hsa_piR_020497|gb|DQ598177|Homo_sapiens	12.4048	0.000226101	protein_coding	RP3-467L1.1-001	7.45238	0.000325629
miRNA	hsa-mir-618	12.381	0.000225667	miRNA	hsa-mir-655	7.45238	0.000325629
protein_coding	Z84721.6-001	12.3571	0.000225233	other_TMapped	ENST00000527295.5	7.45238	0.000325629
miRNA	hsa-mir-412	12.3571	0.000225233	other_TMapped	ENST00000459503.1	7.45238	0.000325629
tRNA	tRNA-Ser-GCT-2-1	12.3333	0.0002248	other_TMapped	ENST00000477425.1	7.42857	0.000324589
piRNA	hsa_piR_016945|gb|DQ593356|Homo_sapiens	12.3095	0.000224366	protein_coding	RP11-43F13.2-001	7.40476	0.000323548
other_TMapped	ENST00000602813.1	12.2857	0.000223932	other_TMapped	ENST00000441013.5	7.40476	0.000323548
miRNA	hsa-mir-873	12.2619	0.000223498	miRNA	hsa-mir-30c-1	7.38095	0.000322508
miRNA	hsa-mir-4665	12.2619	0.000223498	protein_coding	MSRB1-206	7.35714	0.000321468
protein_coding	AC069185.4-005	12.2619	0.000223498	other_TMapped	ENST00000563475.1	7.35714	0.000321468
tRNA	tRNA-Leu-CAG-1-1	12.2381	0.000223064	miRNA	hsa-mir-6726	7.33333	0.000320427
other_TMapped	ENST00000489107.1	12.2143	0.00022263	other_TMapped	ENST00000635274.1	7.33333	0.000320427
other_TMapped	ENST00000364469.1	12.2143	0.00022263	miRNA	hsa-mir-3180-2	7.30952	0.000319387
other_TMapped	ENST00000627545.2	12.1667	0.000221762	protein_coding	RP11-467E3.2-001	7.28571	0.000318347
other_TMapped	ENST00000554200.1	12.1667	0.000221762	miRNA	hsa-mir-33a	7.28571	0.000318347
protein_coding	RP11-90L20.4-001	12.1429	0.000221328	protein_coding	AC136431.1-001	7.2619	0.000317306
protein_coding	RP11-168O22.2-001	12.119	0.000220894	other_TMapped	ENST00000443930.1	7.21429	0.000315226
other_TMapped	ENST00000523009.1	12.0952	0.00022046	other_TMapped	ENST00000617626.1	7.16667	0.000313145
protein_coding	RP3-431A14.3-001	12.0476	0.000219592	protein_coding	RP11-380J17.2-001	7.14286	0.000312104
protein_coding	AC004702.1-018	12.0476	0.000219592	miRNA	hsa-mir-548ap	7.14286	0.000312104
protein_coding	ST6GALNAC6-215	12.0238	0.000219158	other_TMapped	ENST00000548526.1	7.14286	0.000312104
miRNA	hsa-mir-4326	12.0238	0.000219158	other_TMapped	ENST00000451607.5	7.14286	0.000312104
piRNA	hsa_piR_020496|gb|DQ598175|Homo_sapiens	12.0238	0.000219158	miRNA	hsa-mir-3064	7.11905	0.000311064
other_TMapped	ENST00000479165.1	12.0238	0.000219158	protein_coding	RP3-431A14.3-001	7.09524	0.000310024
other_TMapped	ENST00000512854.1	12	0.000218724	protein_coding	RP11-158L12.1-001	7.09524	0.000310024
miRNA	hsa-mir-1233-2	11.9524	0.000217856	other_TMapped	ENST00000550403.5	7.09524	0.000310024
other_TMapped	ENST00000493744.5	11.9286	0.000217422	other_TMapped	ENST00000453187.1	7.07143	0.000308983
protein_coding	RP11-111M22.1-001	11.9048	0.000216988	other_TMapped	ENST00000410423.1	7.07143	0.000308983
miRNA	hsa-mir-548au	11.881	0.000216554	protein_coding	CYP4F22-202	7.07143	0.000308983
tRNA	tRNA-Gly-CCC-3-1	11.8333	0.000215686	miRNA	hsa-mir-502	7.04762	0.000307943
protein_coding	MR1-209	11.8333	0.000215686	other_TMapped	ENST00000464067.1	7.04762	0.000307943
other_TMapped	ENST00000362710.1	11.8333	0.000215686	other_TMapped	ENST00000444017.1	7.04762	0.000307943
protein_coding	AC069368.3-001	11.8333	0.000215686	protein_coding	AC091171.3-021	7.04762	0.000307943
tRNA	tRNA-iMet-CAT-2-1	11.8095	0.000215252	protein_coding	XXbac-BPG1H2.1-001	7.02381	0.000306903
other_TMapped	ENST00000362698.1	11.8095	0.000215252	protein_coding	RP11-18O13.1-001	7.02381	0.000306903
protein_coding	SDC1-202	11.7619	0.000214384	protein_coding	RP11-153I24.3-004	7.02381	0.000306903
tRNA	tRNA-Gln-CTG-6-1	11.6667	0.000212648	other_TMapped	ENST00000563623.5	7.02381	0.000306903
protein_coding	AC068657.1-001	11.6667	0.000212648	other_TMapped	ENST00000551938.1	7.02381	0.000306903
protein_coding	LL0XNC01-136G2.2-001	11.619	0.00021178	tRNA	tRNA-Cys-GCA-15-1	6.97619	0.000304822
miRNA	hsa-mir-6777	11.619	0.00021178	protein_coding	LA16c-312E8.5-001	6.97619	0.000304822
other_TMapped	ENST00000564741.1	11.619	0.00021178	miRNA	hsa-mir-624	6.97619	0.000304822
other_TMapped	ENST00000363079.2	11.5952	0.000211346	protein_coding	XXbac-BPG254B15.9-008	6.95238	0.000303782
miRNA	hsa-mir-3177	11.5476	0.000210478	protein_coding	RP11-147L20.3-001	6.95238	0.000303782
piRNA	hsa_piR_020008|gb|DQ597482|Homo_sapiens	11.5238	0.000210044	other_TMapped	ENST00000603779.1	6.95238	0.000303782
other_TMapped	ENST00000561009.5	11.5	0.00020961	protein_coding	RP4-559A3.1-001	6.92857	0.000302741
tRNA	tRNA-Val-TAC-4-1	11.4762	0.000209176	tRNA	tRNA-Trp-CCA-4-1	6.90476	0.000301701
miRNA	hsa-mir-4687	11.4762	0.000209176	protein_coding	RP11-685I11.4-002	6.90476	0.000301701
miRNA	hsa-mir-211	11.4048	0.000207874	tRNA	tRNA-Leu-CAA-1-2	6.88095	0.000300661
protein_coding	AC016546.1-001	11.3571	0.000207007	miRNA	hsa-mir-509-3	6.88095	0.000300661
other_TMapped	ENST00000537582.1	11.3333	0.000206573	other_TMapped	ENST00000365436.1	6.88095	0.000300661
other_TMapped	ENST00000444770.1	11.3333	0.000206573	tRNA	tRNA-Ile-AAT-12-1	6.85714	0.00029962
protein_coding	AC137935.3-003	11.3333	0.000206573	protein_coding	RP11-714M16.2-001	6.85714	0.00029962
other_TMapped	ENST00000635628.1	11.2619	0.000205271	miRNA	hsa-mir-643	6.85714	0.00029962
protein_coding	RP11-100H21.3-001	11.2381	0.000204837	miRNA	hsa-mir-378e	6.85714	0.00029962
other_TMapped	ENST00000628590.1	11.2381	0.000204837	other_TMapped	ENST00000595498.5	6.85714	0.00029962
other_TMapped	ENST00000390392.3	11.2381	0.000204837	other_TMapped	ENST00000465244.1	6.85714	0.00029962
miRNA	hsa-mir-4511	11.1905	0.000203969	tRNA	tRNA-Ala-TGC-4-1	6.80952	0.00029754
miRNA	hsa-mir-1270	11.1905	0.000203969	protein_coding	RP11-762B21.4-027	6.80952	0.00029754
protein_coding	AC008443.3-002	11.1905	0.000203969	protein_coding	RP11-529L18.2-002	6.80952	0.00029754
other_TMapped	ENST00000448031.1	11.1667	0.000203535	miRNA	hsa-mir-4326	6.80952	0.00029754
protein_coding	RP11-923C2.1-002	11.1429	0.000203101	protein_coding	RP5-1046G13.1-003	6.7619	0.000295459
other_TMapped	ENST00000496978.5	11.1429	0.000203101	tRNA	tRNA-Cys-GCA-21-1	6.7381	0.000294419
protein_coding	RP11-821O7.4-001	11.0952	0.000202233	protein_coding	RP11-126K1.7-019	6.71429	0.000293378
miRNA	hsa-mir-3115	11.0476	0.000201365	other_TMapped	ENST00000465794.1	6.71429	0.000293378
protein_coding	RP5-1033K19.3-001	11.0238	0.000200931	tRNA	tRNA-Val-TAC-4-1	6.69048	0.000292338
other_TMapped	ENST00000363558.1	11.0238	0.000200931	other_TMapped	ENST00000384756.1	6.69048	0.000292338
protein_coding	AC124074.1-005	10.9286	0.000199195	protein_coding	RP1-85F18.3-001	6.66667	0.000291298
miRNA	hsa-mir-3188	10.8571	0.000197893	miRNA	hsa-mir-6791	6.66667	0.000291298
other_TMapped	ENST00000644126.1	10.8571	0.000197893	other_TMapped	ENST00000553596.2	6.66667	0.000291298
other_TMapped	ENST00000364578.1	10.8571	0.000197893	protein_coding	RP11-395B7.3-001	6.61905	0.000289217
tRNA	tRNA-Cys-GCA-10-1	10.8333	0.000197459	other_TMapped	ENST00000479165.1	6.61905	0.000289217
other_TMapped	ENST00000365053.1	10.8095	0.000197025	protein_coding	AP000721.3-001	6.59524	0.000288176
protein_coding	AC103858.1-006	10.8095	0.000197025	tRNA	tRNA-Ser-GCT-3-1	6.57143	0.000287136
other_TMapped	ENST00000410482.1	10.7857	0.000196591	protein_coding	RP5-1099D15.2-002	6.57143	0.000287136
protein_coding	AC018931.2-004	10.7619	0.000196157	protein_coding	AC015720.1-001	6.54762	0.000286096
miRNA	hsa-mir-4677	10.7381	0.000195723	protein_coding	RP11-112J3.20-001	6.52381	0.000285055
other_TMapped	ENST00000362761.1	10.7143	0.000195289	protein_coding	MT-CYB-201	6.52381	0.000285055
miRNA	hsa-mir-7849	10.6905	0.000194855	other_TMapped	ENST00000472564.1	6.52381	0.000285055
other_TMapped	ENST00000447583.2	10.6905	0.000194855	miRNA	hsa-mir-103a-1	6.5	0.000284015
protein_coding	AC007381.4-002	10.6905	0.000194855	tRNA	tRNA-Val-TAC-3-1	6.47619	0.000282975
protein_coding	RP11-396C23.1-003	10.6429	0.000193987	miRNA	hsa-mir-218-1	6.47619	0.000282975
protein_coding	RP11-713C19.3-003	10.5714	0.000192685	other_TMapped	ENST00000488743.6	6.45238	0.000281934
miRNA	hsa-mir-548a-3	10.5476	0.000192251	protein_coding	CTD-2323A1.1-004	6.42857	0.000280894
protein_coding	RP11-422P24.2-001	10.5238	0.000191817	miRNA	hsa-mir-1255b-2	6.40476	0.000279854
miRNA	hsa-mir-5006	10.5238	0.000191817	other_TMapped	ENST00000629083.1	6.40476	0.000279854
protein_coding	AC006451.2-001	10.5238	0.000191817	protein_coding	AC104135.1-002	6.40476	0.000279854
protein_coding	RP11-467L13.2-010	10.4524	0.000190515	miRNA	hsa-mir-3682	6.38095	0.000278813
other_TMapped	ENST00000417720.1	10.4524	0.000190515	protein_coding	FBN2-201	6.38095	0.000278813
protein_coding	CTD-3018O17.2-004	10.4286	0.000190081	protein_coding	RP11-139H14.1-001	6.35714	0.000277773
protein_coding	AC106763.1-002	10.4286	0.000190081	miRNA	hsa-mir-5003	6.33333	0.000276733
miRNA	hsa-mir-1228	10.4048	0.000189647	other_TMapped	ENST00000637374.1	6.33333	0.000276733
protein_coding	Z84721.1-001	10.3571	0.00018878	miRNA	hsa-mir-887	6.30952	0.000275692
other_TMapped	ENST00000554631.2	10.3571	0.00018878	miRNA	hsa-mir-3146	6.30952	0.000275692
protein_coding	RP11-49I4.2-002	10.3333	0.000188346	protein_coding	AC090150.1-001	6.30952	0.000275692
other_TMapped	ENST00000531871.3	10.3333	0.000188346	tRNA	tRNA-Gly-GCC-2-1	6.28571	0.000274652
other_TMapped	ENST00000511897.5	10.3333	0.000188346	protein_coding	RP11-530C5.3-019	6.28571	0.000274652
other_TMapped	ENST00000477178.1	10.3095	0.000187912	other_TMapped	ENST00000634453.1	6.28571	0.000274652
protein_coding	RP11-159D12.4-003	10.2857	0.000187478	tRNA	tRNA-Ser-TGA-4-1	6.2619	0.000273612
protein_coding	AC012321.2-006	10.2857	0.000187478	miRNA	hsa-mir-184	6.2619	0.000273612
other_TMapped	ENST00000623477.1	10.2381	0.00018661	protein_coding	CTD-2510G9.1-001	6.2619	0.000273612
tRNA	tRNA-Gly-GCC-2-6	10.1905	0.000185742	protein_coding	AL121656.1-001	6.2381	0.000272571
protein_coding	RP11-722P11.5-001	10.1905	0.000185742	tRNA	tRNA-Arg-TCT-3-2	6.21429	0.000271531
protein_coding	RP11-65N13.5-001	10.1905	0.000185742	protein_coding	RP5-902P8.6-007	6.21429	0.000271531
protein_coding	AP000313.6-004	10.1905	0.000185742	protein_coding	RP5-867C24.2-001	6.21429	0.000271531
protein_coding	CTB-61I7.1-002	10.1667	0.000185308	piRNA	hsa_piR_004308|gb|DQ575882|Homo_sapiens	6.21429	0.000271531
protein_coding	AC011461.6-003	10.1667	0.000185308	protein_coding	AC090440.1-001	6.21429	0.000271531
other_TMapped	ENST00000524450.1	10.1429	0.000184874	miRNA	hsa-mir-211	6.19048	0.000270491
other_TMapped	ENST00000459041.1	10.1429	0.000184874	protein_coding	AC018931.2-004	6.19048	0.000270491
protein_coding	AC104759.1-001	10.1429	0.000184874	protein_coding	RP11-312N17.3-003	6.16667	0.00026945
YRNA	RNY3P4-201	10.119	0.00018444	other_TMapped	ENST00000363426.1	6.16667	0.00026945
other_TMapped	ENST00000390378.1	10.0952	0.000184006	protein_coding	AC011556.1-001	6.16667	0.00026945
other_TMapped	ENST00000383978.1	10.0952	0.000184006	other_TMapped	ENST00000609940.5	6.14286	0.00026841
protein_coding	RP11-410F19.1-016	10.0714	0.000183572	protein_coding	RP5-1033K19.3-001	6.11905	0.000267369
other_TMapped	ENST00000563670.1	10.0714	0.000183572	other_TMapped	ENST00000384446.1	6.11905	0.000267369
YRNA	RNY4P13-201	10.0476	0.000183138	other_TMapped	ENST00000363564.1	6.11905	0.000267369
protein_coding	RP3-370M22.7-001	10.0238	0.000182704	protein_coding	AC005726.13-002	6.11905	0.000267369
miRNA	hsa-mir-4707	10.0238	0.000182704	protein_coding	RP11-56N19.3-001	6.09524	0.000266329
protein_coding	AC009570.2-001	10.0238	0.000182704	miRNA	hsa-mir-550a-3	6.09524	0.000266329
protein_coding	RP11-531E13.1-001	10	0.00018227	other_TMapped	ENST00000411039.1	6.09524	0.000266329
protein_coding	AC005390.1-002	9.97619	0.000181836	other_TMapped	ENST00000590721.5	6.07143	0.000265289
piRNA	hsa_piR_019091|gb|DQ596211|Homo_sapiens	9.95238	0.000181402	protein_coding	AC103858.1-006	6.07143	0.000265289
other_TMapped	ENST00000360737.4	9.95238	0.000181402	miRNA	hsa-mir-6772	6.04762	0.000264248
miRNA	hsa-mir-3187	9.90476	0.000180534	other_TMapped	ENST00000523009.1	6.04762	0.000264248
protein_coding	RP11-74A12.1-014	9.88095	0.0001801	other_TMapped	ENST00000453185.5	6.04762	0.000264248
miRNA	hsa-mir-6861	9.85714	0.000179666	protein_coding	AC009570.3-005	6.04762	0.000264248
tRNA	tRNA-Leu-CAA-4-1	9.83333	0.000179232	piRNA	hsa_piR_020498|gb|DQ598180|Homo_sapiens	6.02381	0.000263208
other_TMapped	ENST00000606915.1	9.80952	0.000178798	protein_coding	RP1-167A14.1-001	6	0.000262168
protein_coding	RP11-49I4.2-005	9.78571	0.000178364	other_TMapped	ENST00000363079.2	6	0.000262168
protein_coding	AC009078.5-001	9.78571	0.000178364	protein_coding	RP11-141M3.4-003	5.97619	0.000261127
protein_coding	AC006547.12-001	9.78571	0.000178364	protein_coding	MMRN1-201	5.97619	0.000261127
tRNA	tRNA-Asn-GTT-1-1	9.7619	0.00017793	protein_coding	RP11-371I20.1-001	5.95238	0.000260087
protein_coding	AC015720.1-001	9.7619	0.00017793	protein_coding	AC005390.1-003	5.95238	0.000260087
miRNA	hsa-mir-490	9.7381	0.000177496	protein_coding	AC005390.1-002	5.95238	0.000260087
piRNA	hsa_piR_020498|gb|DQ598180|Homo_sapiens	9.7381	0.000177496	tRNA	tRNA-Tyr-GTA-8-1	5.92857	0.000259047
protein_coding	CTA-228A9.2-002	9.7381	0.000177496	miRNA	hsa-mir-6509	5.92857	0.000259047
protein_coding	RP11-315I20.5-001	9.71429	0.000177062	piRNA	hsa_piR_020541|gb|DQ598252|Homo_sapiens	5.92857	0.000259047
miRNA	hsa-mir-376b	9.71429	0.000177062	other_TMapped	ENST00000602172.1	5.92857	0.000259047
miRNA	hsa-mir-6812	9.69048	0.000176628	tRNA	tRNA-Leu-CAG-1-1	5.90476	0.000258006
other_TMapped	ENST00000459579.1	9.69048	0.000176628	protein_coding	AC092798.4-002	5.90476	0.000258006
protein_coding	CTD-2510G9.1-001	9.69048	0.000176628	protein_coding	RP1-178F15.2-005	5.88095	0.000256966
other_TMapped	ENST00000410535.1	9.66667	0.000176194	protein_coding	CPA4-202	5.88095	0.000256966
tRNA	tRNA-Arg-TCG-3-1	9.59524	0.000174892	protein_coding	RP11-52A20.1-005	5.85714	0.000255926
protein_coding	RP11-659O3.4-001	9.59524	0.000174892	miRNA	hsa-mir-6833	5.85714	0.000255926
other_TMapped	ENST00000441013.5	9.59524	0.000174892	miRNA	hsa-mir-4659b	5.85714	0.000255926
tRNA	tRNA-Lys-CTT-2-5	9.57143	0.000174458	other_TMapped	ENST00000550262.1	5.83333	0.000254885
protein_coding	XXbac-BPG181M17.2-002	9.54762	0.000174024	other_TMapped	ENST00000384621.1	5.83333	0.000254885
other_TMapped	ENST00000581956.1	9.54762	0.000174024	protein_coding	AC104389.18-004	5.83333	0.000254885
other_TMapped	ENST00000638356.1	9.5	0.000173156	protein_coding	AC091654.4-001	5.83333	0.000254885
protein_coding	AC012184.7-001	9.47619	0.000172722	protein_coding	RP11-452K12.1-001	5.80952	0.000253845
miRNA	hsa-mir-548at	9.45238	0.000172288	protein_coding	RP1-18D14.6-002	5.80952	0.000253845
miRNA	hsa-mir-4701	9.45238	0.000172288	other_TMapped	ENST00000363066.1	5.80952	0.000253845
miRNA	hsa-mir-6837	9.38095	0.000170987	other_TMapped	ENST00000504799.1	5.78571	0.000252805
miRNA	hsa-mir-624	9.38095	0.000170987	miRNA	hsa-mir-3677	5.7619	0.000251764
protein_coding	AC106782.8-001	9.38095	0.000170987	protein_coding	AP001269.1-001	5.7619	0.000251764
protein_coding	RP11-46A10.3-001	9.33333	0.000170119	protein_coding	AC064852.3-001	5.7619	0.000251764
miRNA	hsa-mir-6882	9.28571	0.000169251	protein_coding	RP5-858B16.1-026	5.7381	0.000250724
miRNA	hsa-mir-499b	9.2619	0.000168817	other_TMapped	ENST00000362627.1	5.7381	0.000250724
protein_coding	DKC1-213	9.2619	0.000168817	protein_coding	AC078834.6-007	5.7381	0.000250724
protein_coding	RP3-429G5.4-001	9.2381	0.000168383	protein_coding	RP11-691N7.5-007	5.71429	0.000249684
protein_coding	RP11-175J10.3-001	9.21429	0.000167949	protein_coding	RP11-124H7.2-003	5.71429	0.000249684
other_TMapped	ENST00000578934.1	9.21429	0.000167949	other_TMapped	ENST00000605778.1	5.71429	0.000249684
other_TMapped	ENST00000451607.5	9.21429	0.000167949	protein_coding	CTD-2515A14.2-023	5.71429	0.000249684
miRNA	hsa-mir-6843	9.19048	0.000167515	piRNA	hsa_piR_016240|gb|DQ592148|Homo_sapiens	5.69048	0.000248643
miRNA	hsa-mir-6791	9.19048	0.000167515	tRNA	tRNA-Gln-CTG-2-1	5.66667	0.000247603
miRNA	hsa-mir-206	9.11905	0.000166213	protein_coding	RP11-670E13.4-001	5.66667	0.000247603
miRNA	hsa-mir-1237	9.09524	0.000165779	protein_coding	AC013439.1-001	5.66667	0.000247603
other_TMapped	ENST00000362552.1	9.09524	0.000165779	other_TMapped	ENST00000581764.1	5.64286	0.000246563
tRNA	tRNA-Leu-AAG-1-1	9.07143	0.000165345	protein_coding	CTD-3026N16.1-001	5.64286	0.000246563
protein_coding	RP11-399J11.2-001	9.07143	0.000165345	protein_coding	AC027682.2-005	5.64286	0.000246563
protein_coding	IKZF5-205	9.07143	0.000165345	protein_coding	AC006369.1-001	5.64286	0.000246563
miRNA	hsa-mir-4750	9.07143	0.000165345	miRNA	hsa-mir-548aa-1	5.61905	0.000245522
protein_coding	RP1-34B20.6-001	9.02381	0.000164477	miRNA	hsa-mir-4738	5.61905	0.000245522
miRNA	hsa-mir-129-1	9.02381	0.000164477	tRNA	tRNA-Ala-TGC-6-1	5.59524	0.000244482
other_TMapped	ENST00000447430.1	9.02381	0.000164477	miRNA	hsa-mir-3691	5.59524	0.000244482
protein_coding	CTD-2013N17.5-008	9.02381	0.000164477	miRNA	hsa-mir-151b	5.54762	0.000242401
protein_coding	RP11-691N7.5-001	8.97619	0.000163609	protein_coding	RP11-23J9.2-001	5.52381	0.000241361
miRNA	hsa-mir-365b	8.95238	0.000163175	miRNA	hsa-mir-19b-1	5.52381	0.000241361
other_TMapped	ENST00000459503.1	8.95238	0.000163175	piRNA	hsa_piR_020497|gb|DQ598177|Homo_sapiens	5.52381	0.000241361
other_TMapped	ENST00000605778.1	8.88095	0.000161873	other_TMapped	ENST00000365241.1	5.47619	0.00023928
protein_coding	RP5-1050D4.1-002	8.85714	0.000161439	protein_coding	RP11-749I16.2-003	5.42857	0.000237199
other_TMapped	ENST00000512374.1	8.85714	0.000161439	protein_coding	RP11-473M20.12-005	5.42857	0.000237199
protein_coding	AC010095.4-001	8.85714	0.000161439	protein_coding	RP11-193H5.6-001	5.42857	0.000237199
protein_coding	AC006547.9-012	8.85714	0.000161439	miRNA	hsa-mir-6780a	5.42857	0.000237199
tRNA	tRNA-Ala-TGC-6-1	8.83333	0.000161005	protein_coding	CTD-2335L22.3-002	5.42857	0.000237199
miRNA	hsa-mir-184	8.80952	0.000160571	tRNA	tRNA-Tyr-GTA-5-5	5.40476	0.000236159
tRNA	tRNA-Arg-CCT-1-1	8.78571	0.000160137	miRNA	hsa-mir-6855	5.40476	0.000236159
miRNA	hsa-mir-4676	8.78571	0.000160137	other_TMapped	ENST00000387419.1	5.38095	0.000235119
other_TMapped	ENST00000483901.2	8.78571	0.000160137	protein_coding	RP11-494H4.1-013	5.35714	0.000234078
piRNA	hsa_piR_014733|gb|DQ590165|Homo_sapiens	8.7619	0.000159703	protein_coding	MAGEA4-201	5.35714	0.000234078
tRNA	tRNA-Ser-GCT-1-1	8.7381	0.000159269	protein_coding	DROSHA-201	5.33333	0.000233038
protein_coding	RP11-196G18.9-001	8.7381	0.000159269	protein_coding	CTD-2545M3.4-002	5.33333	0.000233038
other_TMapped	ENST00000363244.1	8.7381	0.000159269	protein_coding	CTD-2369P2.9-001	5.33333	0.000233038
other_TMapped	ENST00000362534.1	8.71429	0.000158835	tRNA	tRNA-His-GTG-1-1	5.30952	0.000231998
protein_coding	RP11-463C8.1-001	8.69048	0.000158401	protein_coding	AC092647.8-002	5.30952	0.000231998
miRNA	hsa-mir-31	8.69048	0.000158401	protein_coding	RP11-102M2.1-004	5.28571	0.000230957
protein_coding	AC005954.1-001	8.66667	0.000157967	protein_coding	ZNF843-203	5.2619	0.000229917
tRNA	tRNA-Tyr-GTA-5-5	8.64286	0.000157533	other_TMapped	ENST00000574072.5	5.2619	0.000229917
tRNA	tRNA-Asn-GTT-5-1	8.64286	0.000157533	other_TMapped	ENST00000492581.5	5.2619	0.000229917
miRNA	hsa-mir-550a-3	8.64286	0.000157533	protein_coding	AC130324.1-001	5.2619	0.000229917
miRNA	hsa-mir-1538	8.64286	0.000157533	protein_coding	RP5-1066H13.2-005	5.2381	0.000228877
other_TMapped	ENST00000411288.1	8.64286	0.000157533	other_TMapped	ENST00000606915.1	5.2381	0.000228877
YRNA	RNY3P5-201	8.59524	0.000156665	other_TMapped	ENST00000391023.1	5.2381	0.000228877
miRNA	hsa-mir-548h-4	8.59524	0.000156665	protein_coding	RP11-112J3.1-001	5.21429	0.000227836
miRNA	hsa-mir-545	8.59524	0.000156665	other_TMapped	ENST00000510511.2	5.19048	0.000226796
protein_coding	RP5-1042K10.8-001	8.57143	0.000156231	YRNA	RNY1P5-201	5.16667	0.000225756
miRNA	hsa-mir-6772	8.57143	0.000156231	other_TMapped	ENST00000504184.3	5.16667	0.000225756
tRNA	tRNA-Pro-AGG-1-1	8.54762	0.000155797	other_TMapped	ENST00000479052.5	5.16667	0.000225756
protein_coding	AC090150.1-001	8.54762	0.000155797	protein_coding	AC120057.4-007	5.16667	0.000225756
protein_coding	AC004846.4-001	8.54762	0.000155797	protein_coding	RP11-161H23.4-006	5.14286	0.000224715
protein_coding	RP11-483E23.8-001	8.52381	0.000155363	other_TMapped	ENST00000523485.5	5.14286	0.000224715
protein_coding	RP11-346L1.1-001	8.52381	0.000155363	other_TMapped	ENST00000476268.6	5.14286	0.000224715
other_TMapped	ENST00000451608.2	8.52381	0.000155363	other_TMapped	ENST00000410708.1	5.14286	0.000224715
other_TMapped	ENST00000410344.1	8.5	0.000154929	protein_coding	AC083982.2-003	5.14286	0.000224715
protein_coding	AC020663.8-001	8.5	0.000154929	protein_coding	AC016699.2-001	5.14286	0.000224715
miRNA	hsa-mir-188	8.47619	0.000154495	tRNA	tRNA-Arg-TCT-5-1	5.11905	0.000223675
piRNA	hsa_piR_020500|gb|DQ598190|Homo_sapiens	8.47619	0.000154495	other_TMapped	ENST00000626826.1	5.11905	0.000223675
tRNA	tRNA-Tyr-GTA-4-1	8.45238	0.000154061	other_TMapped	ENST00000564176.5	5.11905	0.000223675
protein_coding	AC099689.1-006	8.45238	0.000154061	other_TMapped	ENST00000386037.1	5.11905	0.000223675
miRNA	hsa-mir-3064	8.42857	0.000153627	tRNA	tRNA-Ala-AGC-6-1	5.09524	0.000222635
other_TMapped	ENST00000554169.1	8.42857	0.000153627	other_TMapped	ENST00000597199.1	5.09524	0.000222635
other_TMapped	ENST00000384377.1	8.42857	0.000153627	other_TMapped	ENST00000571815.1	5.09524	0.000222635
miRNA	hsa-mir-1284	8.40476	0.000153193	protein_coding	AC013448.3-002	5.09524	0.000222635
piRNA	hsa_piR_018165|gb|DQ595023|Homo_sapiens	8.40476	0.000153193	other_TMapped	ENST00000433843.1	5.07143	0.000221594
other_TMapped	ENST00000384550.1	8.40476	0.000153193	other_TMapped	ENST00000365208.1	5.07143	0.000221594
other_TMapped	ENST00000365532.1	8.35714	0.000152326	protein_coding	RP11-141M3.2-008	5.04762	0.000220554
protein_coding	AC104389.18-004	8.35714	0.000152326	miRNA	hsa-mir-219a-1	5.04762	0.000220554
protein_coding	XXbac-BPG157A10.10-001	8.33333	0.000151892	other_TMapped	ENST00000595467.1	5.04762	0.000220554
tRNA	tRNA-Leu-CAA-1-2	8.33333	0.000151892	protein_coding	AC016656.2-009	5.04762	0.000220554
protein_coding	AC005391.1-001	8.28571	0.000151024	protein_coding	RP11-307E17.10-004	5.02381	0.000219513
protein_coding	AC004142.2-001	8.28571	0.000151024	miRNA	hsa-mir-3154	5.02381	0.000219513
miRNA	hsa-mir-219a-1	8.2619	0.00015059	protein_coding	RP11-280I23.2-001	5	0.000218473
piRNA	hsa_piR_010791|gb|DQ584559|Homo_sapiens	8.2619	0.00015059	protein_coding	RP11-245J9.9-003	5	0.000218473
other_TMapped	ENST00000516993.1	8.2619	0.00015059	protein_coding	AC009061.11-001	5	0.000218473
protein_coding	RP11-77K12.6-011	8.2381	0.000150156	tRNA	tRNA-Ile-AAT-1-1	4.97619	0.000217433
other_TMapped	ENST00000623600.1	8.2381	0.000150156	protein_coding	CTB-50L17.15-001	4.97619	0.000217433
other_TMapped	ENST00000580897.1	8.2381	0.000150156	protein_coding	AC003991.2-001	4.97619	0.000217433
other_TMapped	ENST00000572747.1	8.21429	0.000149722	tRNA	tRNA-Lys-CTT-1-2	4.95238	0.000216392
tRNA	tRNA-Gln-CTG-4-1	8.19048	0.000149288	protein_coding	RP11-23J16.1-011	4.95238	0.000216392
protein_coding	AC114291.5-002	8.19048	0.000149288	other_TMapped	ENST00000463397.3	4.95238	0.000216392
protein_coding	RP11-240G22.2-001	8.16667	0.000148854	protein_coding	AC005321.1-009	4.95238	0.000216392
other_TMapped	ENST00000593093.5	8.14286	0.00014842	miRNA	hsa-mir-3913-2	4.92857	0.000215352
protein_coding	RP11-314N13.7-003	8.11905	0.000147986	other_TMapped	ENST00000397772.2	4.92857	0.000215352
miRNA	hsa-mir-605	8.11905	0.000147986	other_TMapped	ENST00000364545.1	4.92857	0.000215352
protein_coding	FAM20A-207	8.11905	0.000147986	protein_coding	AF233439.8-001	4.92857	0.000215352
other_TMapped	ENST00000637770.1	8.11905	0.000147986	protein_coding	U52112.3-020	4.90476	0.000214312
protein_coding	AC009948.9-022	8.11905	0.000147986	tRNA	tRNA-Leu-TAA-1-1	4.90476	0.000214312
protein_coding	VDAC2-214	8.09524	0.000147552	protein_coding	RP4-693M11.1-001	4.90476	0.000214312
other_TMapped	ENST00000379640.1	8.07143	0.000147118	protein_coding	RP11-712B9.1-001	4.90476	0.000214312
other_TMapped	ENST00000362921.1	8.07143	0.000147118	other_TMapped	ENST00000623477.1	4.90476	0.000214312
protein_coding	AC011944.1-012	8.07143	0.000147118	piRNA	hsa_piR_019912|gb|DQ597341|Homo_sapiens	4.85714	0.000212231
protein_coding	RP11-98D18.10-001	8.04762	0.000146684	other_TMapped	ENST00000557366.5	4.85714	0.000212231
protein_coding	RP11-395B7.3-001	8.04762	0.000146684	other_TMapped	ENST00000469271.1	4.85714	0.000212231
other_TMapped	ENST00000634453.1	8.04762	0.000146684	tRNA	tRNA-Trp-CCA-5-1	4.83333	0.000211191
tRNA	tRNA-Ala-TGC-4-1	8.02381	0.00014625	protein_coding	DKC1-213	4.83333	0.000211191
protein_coding	RP11-245B11.3-001	8.02381	0.00014625	protein_coding	AC016630.4-003	4.83333	0.000211191
protein_coding	AC010542.7-006	8.02381	0.00014625	piRNA	hsa_piR_017458|gb|DQ594126|Homo_sapiens	4.80952	0.00021015
tRNA	tRNA-Ser-CGA-1-1	8	0.000145816	miRNA	hsa-mir-6804	4.78571	0.00020911
protein_coding	RP5-1056L3.4-005	8	0.000145816	miRNA	hsa-mir-490	4.78571	0.00020911
protein_coding	CHMP7-201	8	0.000145816	protein_coding	AC005774.2-004	4.78571	0.00020911
protein_coding	AC004971.6-006	8	0.000145816	miRNA	hsa-mir-4436b-2	4.7619	0.00020807
protein_coding	RP11-197N18.5-006	7.97619	0.000145382	other_TMapped	ENST00000451035.2	4.7619	0.00020807
miRNA	hsa-mir-3667	7.97619	0.000145382	miRNA	hsa-mir-4750	4.7381	0.000207029
other_TMapped	ENST00000551938.1	7.95238	0.000144948	miRNA	hsa-mir-3174	4.7381	0.000207029
other_TMapped	ENST00000363548.1	7.95238	0.000144948	other_TMapped	ENST00000605265.1	4.7381	0.000207029
protein_coding	AC114766.1-008	7.95238	0.000144948	protein_coding	CTD-2320O4.1-001	4.7381	0.000207029
miRNA	hsa-mir-4738	7.92857	0.000144514	protein_coding	AC130456.3-006	4.7381	0.000207029
protein_coding	AC135893.1-001	7.92857	0.000144514	YRNA	RNY1P11-201	4.71429	0.000205989
protein_coding	UQCC3-201	7.90476	0.00014408	protein_coding	AP000275.65-002	4.71429	0.000205989
tRNA	tRNA-Gln-TTG-4-1	7.90476	0.00014408	protein_coding	RP5-882C2.1-001	4.69048	0.000204949
protein_coding	RP11-242O24.1-016	7.88095	0.000143646	protein_coding	RP4-621F18.1-001	4.69048	0.000204949
other_TMapped	ENST00000510711.5	7.88095	0.000143646	protein_coding	RP1-257A7.1-005	4.66667	0.000203908
protein_coding	AC079336.2-001	7.88095	0.000143646	miRNA	hsa-mir-6807	4.66667	0.000203908
protein_coding	CTB-14D10.3-001	7.85714	0.000143212	other_TMapped	ENST00000411160.1	4.64286	0.000202868
protein_coding	RP11-765O14.3-002	7.83333	0.000142778	protein_coding	AP000487.2-002	4.64286	0.000202868
piRNA	hsa_piR_020362|gb|DQ597968|Homo_sapiens	7.83333	0.000142778	protein_coding	AC093162.4-002	4.64286	0.000202868
other_TMapped	ENST00000451452.1	7.83333	0.000142778	protein_coding	RP11-713C19.3-001	4.61905	0.000201828
other_TMapped	ENST00000365436.1	7.83333	0.000142778	protein_coding	RP11-435A10.1-002	4.61905	0.000201828
protein_coding	AC005390.1-003	7.83333	0.000142778	miRNA	hsa-mir-296	4.61905	0.000201828
miRNA	hsa-mir-3913-2	7.80952	0.000142344	other_TMapped	ENST00000238138.2	4.61905	0.000201828
miRNA	hsa-mir-3191	7.80952	0.000142344	protein_coding	AC074212.7-019	4.61905	0.000201828
other_TMapped	ENST00000365645.1	7.80952	0.000142344	protein_coding	RP11-785H5.1-002	4.59524	0.000200787
protein_coding	AC115115.5-001	7.80952	0.000142344	miRNA	hsa-mir-6843	4.59524	0.000200787
other_TMapped	ENST00000410577.1	7.78571	0.00014191	miRNA	hsa-mir-6788	4.59524	0.000200787
protein_coding	AC124068.2-001	7.7619	0.000141476	protein_coding	RP11-1012A1.6-002	4.57143	0.000199747
tRNA	tRNA-Ile-AAT-8-1	7.7381	0.000141042	other_TMapped	ENST00000475015.5	4.57143	0.000199747
tRNA	tRNA-Ser-TGA-4-1	7.71429	0.000140608	protein_coding	AC092683.2-001	4.57143	0.000199747
tRNA	tRNA-Gln-TTG-3-1	7.71429	0.000140608	protein_coding	AC015689.1-001	4.57143	0.000199747
protein_coding	RP1-18D14.6-002	7.71429	0.000140608	protein_coding	AC010542.7-006	4.57143	0.000199747
piRNA	hsa_piR_004993|gb|DQ576880|Homo_sapiens	7.66667	0.00013974	protein_coding	RP11-337C18.3-001	4.54762	0.000198707
tRNA	tRNA-Ala-AGC-6-1	7.64286	0.000139306	other_TMapped	ENST00000460537.3	4.54762	0.000198707
other_TMapped	ENST00000411160.1	7.64286	0.000139306	protein_coding	RP11-379P1.1-002	4.52381	0.000197666
protein_coding	RP11-722A15.1-001	7.61905	0.000138872	protein_coding	RP11-196G18.9-001	4.52381	0.000197666
protein_coding	PDE5A-203	7.61905	0.000138872	miRNA	hsa-mir-7151	4.52381	0.000197666
miRNA	hsa-mir-194-2	7.61905	0.000138872	protein_coding	RP11-546M21.5-008	4.5	0.000196626
other_TMapped	ENST00000618872.1	7.61905	0.000138872	protein_coding	RP11-20B24.1-012	4.5	0.000196626
other_TMapped	ENST00000364358.1	7.61905	0.000138872	miRNA	hsa-mir-6832	4.5	0.000196626
protein_coding	CTD-2619J13.28-001	7.61905	0.000138872	other_TMapped	ENST00000511897.5	4.5	0.000196626
miRNA	hsa-mir-4466	7.59524	0.000138438	other_TMapped	ENST00000364248.1	4.5	0.000196626
miRNA	hsa-mir-3614	7.59524	0.000138438	miRNA	hsa-mir-618	4.47619	0.000195585
other_TMapped	ENST00000606526.1	7.59524	0.000138438	other_TMapped	ENST00000646642.1	4.47619	0.000195585
protein_coding	RP11-69M1.5-024	7.57143	0.000138004	other_TMapped	ENST00000531871.3	4.47619	0.000195585
miRNA	hsa-mir-548f-1	7.57143	0.000138004	protein_coding	AC093899.4-005	4.47619	0.000195585
protein_coding	MT-ND3-201	7.54762	0.00013757	miRNA	hsa-mir-548h-4	4.45238	0.000194545
miRNA	hsa-mir-548am	7.52381	0.000137136	other_TMapped	ENST00000515983.1	4.45238	0.000194545
other_TMapped	ENST00000548526.1	7.52381	0.000137136	tRNA	tRNA-Asn-GTT-1-1	4.42857	0.000193505
protein_coding	RP13-152O15.6-001	7.47619	0.000136268	protein_coding	RP11-692M12.1-003	4.42857	0.000193505
other_TMapped	ENST00000516003.1	7.47619	0.000136268	protein_coding	AC130686.5-008	4.42857	0.000193505
protein_coding	AC132812.1-002	7.47619	0.000136268	piRNA	hsa_piR_018165|gb|DQ595023|Homo_sapiens	4.40476	0.000192464
other_TMapped	ENST00000525013.1	7.42857	0.0001354	other_TMapped	ENST00000364469.1	4.40476	0.000192464
other_TMapped	ENST00000585237.2	7.40476	0.000134967	protein_coding	AF196969.1-001	4.40476	0.000192464
other_TMapped	ENST00000556078.1	7.38095	0.000134533	protein_coding	MYH13-203	4.38095	0.000191424
other_TMapped	ENST00000453185.5	7.38095	0.000134533	other_TMapped	ENST00000471395.1	4.38095	0.000191424
protein_coding	CYP4F22-202	7.38095	0.000134533	protein_coding	AC000082.3-003	4.38095	0.000191424
miRNA	hsa-mir-3691	7.35714	0.000134099	protein_coding	RP11-469A15.1-003	4.35714	0.000190384
protein_coding	AC105020.1-001	7.35714	0.000134099	miRNA	hsa-mir-6881	4.35714	0.000190384
protein_coding	RP11-293P20.1-001	7.33333	0.000133665	other_TMapped	ENST00000516935.1	4.35714	0.000190384
miRNA	hsa-mir-153-1	7.33333	0.000133665	tRNA	tRNA-SeC-TCA-2-1	4.33333	0.000189343
other_TMapped	ENST00000606420.1	7.33333	0.000133665	protein_coding	RP11-806J18.2-001	4.33333	0.000189343
miRNA	hsa-mir-5196	7.30952	0.000133231	other_TMapped	ENST00000465215.1	4.33333	0.000189343
protein_coding	CTD-2036P10.1-001	7.30952	0.000133231	other_TMapped	ENST00000460909.1	4.33333	0.000189343
tRNA	tRNA-Val-AAC-5-1	7.28571	0.000132797	protein_coding	CTD-2589C9.2-001	4.33333	0.000189343
miRNA	hsa-mir-19b-1	7.28571	0.000132797	protein_coding	CTD-2342J14.10-003	4.33333	0.000189343
protein_coding	RP11-713C19.3-001	7.2619	0.000132363	protein_coding	AC025448.4-002	4.33333	0.000189343
other_TMapped	ENST00000636161.1	7.2619	0.000132363	protein_coding	RP5-929G5.1-002	4.30952	0.000188303
other_TMapped	ENST00000461075.1	7.2619	0.000132363	protein_coding	RP11-659E9.1-001	4.30952	0.000188303
protein_coding	AC009061.11-001	7.2619	0.000132363	protein_coding	RP11-421M1.7-002	4.30952	0.000188303
miRNA	hsa-mir-7854	7.21429	0.000131495	protein_coding	LA16c-314G4.3-001	4.30952	0.000188303
miRNA	hsa-mir-141	7.21429	0.000131495	protein_coding	CTB-59C6.1-001	4.30952	0.000188303
other_TMapped	ENST00000615386.4	7.21429	0.000131495	protein_coding	AP000313.6-004	4.30952	0.000188303
protein_coding	AC006023.7-001	7.21429	0.000131495	protein_coding	AC027318.7-006	4.30952	0.000188303
protein_coding	RP5-1119A7.2-001	7.19048	0.000131061	protein_coding	AC004471.5-001	4.30952	0.000188303
protein_coding	RP11-502H18.1-001	7.19048	0.000131061	protein_coding	RP13-503K1.3-005	4.28571	0.000187263
protein_coding	RP11-589F4.1-001	7.16667	0.000130627	protein_coding	AC026689.1-001	4.28571	0.000187263
other_TMapped	ENST00000629083.1	7.16667	0.000130627	protein_coding	RP3-431A14.2-002	4.2619	0.000186222
other_TMapped	ENST00000619449.2	7.16667	0.000130627	protein_coding	RP11-422N19.4-003	4.2619	0.000186222
other_TMapped	ENST00000553027.1	7.16667	0.000130627	protein_coding	RP1-300I2.1-001	4.2619	0.000186222
other_TMapped	ENST00000364164.1	7.16667	0.000130627	protein_coding	RP1-160A22.3-001	4.2619	0.000186222
protein_coding	RP11-84H15.2-002	7.14286	0.000130193	protein_coding	FZD3-204	4.2619	0.000186222
miRNA	hsa-mir-6891	7.14286	0.000130193	other_TMapped	ENST00000617998.4	4.2619	0.000186222
protein_coding	AC105314.2-001	7.11905	0.000129759	other_TMapped	ENST00000580897.1	4.2619	0.000186222
protein_coding	RP11-152H18.1-011	7.09524	0.000129325	miRNA	hsa-mir-216b	4.2381	0.000185182
tRNA	tRNA-Thr-AGT-6-1	7.04762	0.000128457	other_TMapped	ENST00000384541.1	4.2381	0.000185182
protein_coding	RP11-793H13.2-006	7.04762	0.000128457	protein_coding	AC099539.1-003	4.2381	0.000185182
protein_coding	RP11-20B24.1-012	7.04762	0.000128457	protein_coding	RP11-433J6.3-001	4.21429	0.000184142
other_TMapped	ENST00000550262.1	7.04762	0.000128457	miRNA	hsa-mir-378c	4.21429	0.000184142
protein_coding	AC009118.6-009	7.04762	0.000128457	other_TMapped	ENST00000476053.2	4.21429	0.000184142
miRNA	hsa-mir-548n	7.02381	0.000128023	protein_coding	RP11-778N14.3-001	4.19048	0.000183101
other_TMapped	ENST00000426112.1	7	0.000127589	protein_coding	AC113611.1-002	4.19048	0.000183101
protein_coding	DMBT1-207	7	0.000127589	protein_coding	AC079336.2-001	4.19048	0.000183101
protein_coding	RP11-43N16.1-001	6.97619	0.000127155	tRNA	tRNA-Arg-TCT-2-1	4.16667	0.000182061
other_TMapped	ENST00000490156.1	6.97619	0.000127155	protein_coding	RP11-290D2.1-008	4.16667	0.000182061
protein_coding	CRYZ-205	6.97619	0.000127155	protein_coding	RP11-174N3.1-001	4.16667	0.000182061
protein_coding	AC005291.1-001	6.95238	0.000126721	miRNA	hsa-mir-6876	4.16667	0.000182061
protein_coding	AC004953.3-001	6.92857	0.000126287	miRNA	hsa-mir-4669	4.16667	0.000182061
tRNA	tRNA-Cys-GCA-15-1	6.90476	0.000125853	other_TMapped	ENST00000408792.1	4.16667	0.000182061
YRNA	RNY4P19-201	6.90476	0.000125853	other_TMapped	ENST00000391033.1	4.16667	0.000182061
protein_coding	FBN2-201	6.90476	0.000125853	protein_coding	ZNF217-201	4.14286	0.000181021
other_TMapped	ENST00000524293.1	6.90476	0.000125853	tRNA	tRNA-Val-AAC-6-1	4.14286	0.000181021
protein_coding	RP11-546M21.5-002	6.88095	0.000125419	protein_coding	RP4-747H23.2-001	4.14286	0.000181021
protein_coding	AC008746.4-010	6.88095	0.000125419	miRNA	hsa-mir-6730	4.14286	0.000181021
protein_coding	RP11-510J16.1-001	6.85714	0.000124985	other_TMapped	ENST00000475830.5	4.14286	0.000181021
other_TMapped	ENST00000563846.5	6.85714	0.000124985	protein_coding	CTD-2517O10.2-022	4.14286	0.000181021
protein_coding	AC133528.3-001	6.85714	0.000124985	protein_coding	TARS2-205	4.11905	0.00017998
protein_coding	RP11-712B9.1-001	6.83333	0.000124551	miRNA	hsa-mir-548n	4.11905	0.00017998
miRNA	hsa-mir-675	6.83333	0.000124551	other_TMapped	ENST00000451608.2	4.11905	0.00017998
miRNA	hsa-mir-1255b-2	6.83333	0.000124551	protein_coding	AC144556.1-001	4.11905	0.00017998
protein_coding	AC003991.2-001	6.83333	0.000124551	protein_coding	AC106782.10-001	4.11905	0.00017998
protein_coding	RP11-88B8.1-003	6.80952	0.000124117	protein_coding	AC006946.11-001	4.11905	0.00017998
other_TMapped	ENST00000494995.5	6.80952	0.000124117	protein_coding	RP11-713C19.3-003	4.09524	0.00017894
protein_coding	DROSHA-201	6.80952	0.000124117	YRNA	RNY4P34-201	4.09524	0.00017894
protein_coding	AC006483.1-010	6.80952	0.000124117	miRNA	hsa-mir-6850	4.09524	0.00017894
protein_coding	RP11-1148L6.7-006	6.78571	0.000123683	protein_coding	XXbac-BPG27H4.4-001	4.07143	0.0001779
protein_coding	AC105921.1-001	6.78571	0.000123683	miRNA	hsa-mir-6736	4.07143	0.0001779
protein_coding	CTD-2369P2.9-001	6.7619	0.000123249	other_TMapped	ENST00000514040.1	4.07143	0.0001779
other_TMapped	ENST00000364879.1	6.7381	0.000122815	tRNA	tRNA-Thr-AGT-6-1	4.04762	0.000176859
protein_coding	AC013436.8-001	6.7381	0.000122815	protein_coding	RP11-332E3.3-005	4.04762	0.000176859
miRNA	hsa-mir-548w	6.71429	0.000122381	other_TMapped	ENST00000554631.2	4.04762	0.000176859
protein_coding	CTD-2510G9.1-007	6.66667	0.000121513	protein_coding	RP13-218O1.1-001	4.02381	0.000175819
miRNA	hsa-mir-8072	6.64286	0.000121079	protein_coding	RP11-7O11.5-010	4.02381	0.000175819
protein_coding	CTD-2530N21.3-001	6.64286	0.000121079	miRNA	hsa-mir-6836	4.02381	0.000175819
protein_coding	RP11-771O11.3-001	6.61905	0.000120645	piRNA	hsa_piR_017295|gb|DQ593909|Homo_sapiens	4.02381	0.000175819
protein_coding	RP1-102G20.1-001	6.59524	0.000120211	other_TMapped	ENST00000624945.1	4.02381	0.000175819
miRNA	hsa-mir-3155b	6.59524	0.000120211	other_TMapped	ENST00000563670.1	4.02381	0.000175819
protein_coding	AC009570.3-005	6.59524	0.000120211	other_TMapped	ENST00000440377.2	4.02381	0.000175819
protein_coding	NOL4L-210	6.57143	0.000119777	protein_coding	AP006309.3-006	4.02381	0.000175819
tRNA	tRNA-Phe-GAA-4-1	6.54762	0.000119343	protein_coding	RP13-577J18.1-002	4	0.000174779
protein_coding	RP11-379F12.6-003	6.54762	0.000119343	miRNA	hsa-mir-6787	4	0.000174779
protein_coding	AC020659.1-005	6.54762	0.000119343	other_TMapped	ENST00000637966.1	4	0.000174779
protein_coding	AC005321.1-005	6.54762	0.000119343	other_TMapped	ENST00000591616.1	4	0.000174779
miRNA	hsa-mir-1250	6.52381	0.000118909	other_TMapped	ENST00000417720.1	4	0.000174779
other_TMapped	ENST00000384756.1	6.52381	0.000118909	miRNA	hsa-mir-4701	3.97619	0.000173738
other_TMapped	ENST00000384750.1	6.52381	0.000118909	other_TMapped	ENST00000564224.1	3.97619	0.000173738
protein_coding	AC016699.2-001	6.52381	0.000118909	other_TMapped	ENST00000487309.3	3.97619	0.000173738
protein_coding	RP11-480K16.2-002	6.5	0.000118475	other_TMapped	ENST00000365448.1	3.97619	0.000173738
other_TMapped	ENST00000559231.1	6.5	0.000118475	protein_coding	AC096574.2-007	3.97619	0.000173738
other_TMapped	ENST00000503909.5	6.5	0.000118475	protein_coding	AC008410.1-001	3.97619	0.000173738
other_TMapped	ENST00000364662.1	6.5	0.000118475	protein_coding	RP11-701H16.1-002	3.95238	0.000172698
protein_coding	WNK1-209	6.47619	0.000118041	protein_coding	RP11-1078H9.3-001	3.95238	0.000172698
protein_coding	RP5-929G5.1-002	6.47619	0.000118041	miRNA	hsa-mir-378g	3.95238	0.000172698
miRNA	hsa-mir-500b	6.47619	0.000118041	other_TMapped	ENST00000628531.2	3.95238	0.000172698
other_TMapped	ENST00000579553.1	6.47619	0.000118041	other_TMapped	ENST00000419909.6	3.95238	0.000172698
other_TMapped	ENST00000363664.1	6.47619	0.000118041	protein_coding	CTB-186G2.2-002	3.95238	0.000172698
miRNA	hsa-mir-4454	6.45238	0.000117607	protein_coding	RP11-90L1.2-001	3.92857	0.000171657
other_TMapped	ENST00000510511.2	6.45238	0.000117607	miRNA	hsa-mir-3667	3.92857	0.000171657
other_TMapped	ENST00000477009.2	6.45238	0.000117607	other_TMapped	ENST00000540299.1	3.92857	0.000171657
protein_coding	RP5-973N23.3-020	6.40476	0.00011674	protein_coding	AC108004.1-015	3.92857	0.000171657
piRNA	hsa_piR_004308|gb|DQ575882|Homo_sapiens	6.40476	0.00011674	protein_coding	AC010525.3-003	3.92857	0.000171657
tRNA	tRNA-Lys-CTT-3-1	6.38095	0.000116306	tRNA	tRNA-Leu-CAA-1-1	3.90476	0.000170617
miRNA	hsa-mir-6749	6.38095	0.000116306	tRNA	tRNA-Gln-CTG-6-1	3.90476	0.000170617
miRNA	hsa-mir-5001	6.38095	0.000116306	protein_coding	KB-1153C10.1-015	3.90476	0.000170617
other_TMapped	ENST00000643494.1	6.38095	0.000116306	piRNA	hsa_piR_016984|gb|DQ593431|Homo_sapiens	3.90476	0.000170617
protein_coding	XXbac-BPG32J3.11-001	6.35714	0.000115872	other_TMapped	ENST00000576171.1	3.90476	0.000170617
protein_coding	CTD-2589C9.2-001	6.35714	0.000115872	protein_coding	AC073464.2-003	3.90476	0.000170617
protein_coding	AC016630.4-008	6.35714	0.000115872	protein_coding	AC105105.2-003	3.88095	0.000169577
protein_coding	RP11-12M5.2-001	6.30952	0.000115004	protein_coding	AC011492.4-002	3.88095	0.000169577
other_TMapped	ENST00000571632.5	6.30952	0.000115004	other_TMapped	ENST00000606115.1	3.85714	0.000168536
protein_coding	RP11-290D2.1-008	6.28571	0.00011457	protein_coding	AC105752.1-001	3.85714	0.000168536
miRNA	hsa-mir-6833	6.28571	0.00011457	protein_coding	AC005329.5-001	3.85714	0.000168536
protein_coding	RP1-34B20.12-001	6.2619	0.000114136	protein_coding	RP11-47G11.1-001	3.83333	0.000167496
piRNA	hsa_piR_000765|gb|DQ570956|Homo_sapiens	6.2619	0.000114136	protein_coding	RP11-25C19.2-001	3.83333	0.000167496
other_TMapped	ENST00000521619.1	6.2619	0.000114136	protein_coding	RP11-249L4.1-001	3.83333	0.000167496
other_TMapped	ENST00000362396.1	6.2619	0.000114136	miRNA	hsa-mir-548ac	3.83333	0.000167496
other_TMapped	ENST00000408792.1	6.21429	0.000113268	other_TMapped	ENST00000506873.5	3.83333	0.000167496
other_TMapped	ENST00000386037.1	6.21429	0.000113268	other_TMapped	ENST00000365510.1	3.83333	0.000167496
tRNA	tRNA-Thr-AGT-5-1	6.16667	0.0001124	protein_coding	AC006023.7-001	3.83333	0.000167496
protein_coding	RP4-566D2.2-001	6.16667	0.0001124	protein_coding	AC004953.3-001	3.83333	0.000167496
protein_coding	AC007283.1-001	6.16667	0.0001124	protein_coding	AC003695.1-004	3.83333	0.000167496
tRNA	tRNA-Lys-CTT-1-1	6.14286	0.000111966	protein_coding	AC003967.1-010	3.80952	0.000166456
tRNA	tRNA-Leu-AAG-4-1	6.14286	0.000111966	tRNA	tRNA-Tyr-GTA-2-1	3.78571	0.000165415
other_TMapped	ENST00000620268.1	6.14286	0.000111966	protein_coding	RP5-885A10.1-001	3.78571	0.000165415
other_TMapped	ENST00000463779.3	6.14286	0.000111966	protein_coding	RP13-259F12.1-003	3.78571	0.000165415
protein_coding	AC090282.2-003	6.14286	0.000111966	protein_coding	RP11-214I20.2-001	3.78571	0.000165415
tRNA	tRNA-Leu-TAA-3-1	6.11905	0.000111532	protein_coding	XXbac-BPG24O18.5-002	3.7619	0.000164375
protein_coding	RP5-1167H4.3-002	6.11905	0.000111532	protein_coding	RP11-386G11.2-001	3.7619	0.000164375
protein_coding	RP11-867G23.11-001	6.09524	0.000111098	protein_coding	RP11-350M7.1-004	3.7619	0.000164375
protein_coding	RP11-831H9.15-001	6.09524	0.000111098	protein_coding	RP11-115M6.5-001	3.7619	0.000164375
other_TMapped	ENST00000629249.1	6.09524	0.000111098	protein_coding	AC114291.1-001	3.7619	0.000164375
other_TMapped	ENST00000557366.5	6.09524	0.000111098	other_TMapped	ENST00000567216.5	3.7381	0.000163335
other_TMapped	ENST00000508158.5	6.09524	0.000111098	other_TMapped	ENST00000533109.6	3.7381	0.000163335
miRNA	hsa-mir-5683	6.07143	0.000110664	other_TMapped	ENST00000415338.1	3.7381	0.000163335
miRNA	hsa-mir-1273c	6.07143	0.000110664	protein_coding	CTD-3105H18.3-001	3.7381	0.000163335
protein_coding	RP11-284N8.1-008	6.04762	0.00011023	protein_coding	AC008781.8-001	3.7381	0.000163335
protein_coding	RP11-148L5.2-002	6.04762	0.00011023	protein_coding	RP11-73M18.1-001	3.71429	0.000162294
other_TMapped	ENST00000529392.1	6.04762	0.00011023	protein_coding	RP11-218E20.1-001	3.71429	0.000162294
other_TMapped	ENST00000384147.1	6.04762	0.00011023	protein_coding	RP11-161A14.2-001	3.71429	0.000162294
protein_coding	CTD-2270P14.4-001	6.04762	0.00011023	protein_coding	NKX2-3-202	3.71429	0.000162294
protein_coding	RP4-693M11.1-001	6.02381	0.000109796	protein_coding	MTMR2-203	3.71429	0.000162294
protein_coding	RP11-714M16.2-001	6.02381	0.000109796	miRNA	hsa-mir-3613	3.71429	0.000162294
other_TMapped	ENST00000609940.5	6.02381	0.000109796	miRNA	hsa-mir-299	3.71429	0.000162294
protein_coding	AC091491.1-002	6.02381	0.000109796	other_TMapped	ENST00000568142.2	3.71429	0.000162294
protein_coding	RP3-525N14.6-001	6	0.000109362	other_TMapped	ENST00000505081.5	3.71429	0.000162294
protein_coding	RP11-161H23.4-006	6	0.000109362	other_TMapped	ENST00000417358.1	3.71429	0.000162294
piRNA	hsa_piR_017033|gb|DQ593538|Homo_sapiens	6	0.000109362	other_TMapped	ENST00000380931.6	3.69048	0.000161254
protein_coding	XXbac-BPG34K20.2-001	5.97619	0.000108928	protein_coding	CTD-2560E9.1-008	3.69048	0.000161254
miRNA	hsa-mir-3174	5.97619	0.000108928	protein_coding	AC108449.1-001	3.69048	0.000161254
other_TMapped	ENST00000362627.1	5.97619	0.000108928	tRNA	tRNA-SeC-TCA-1-1	3.66667	0.000160214
other_TMapped	ENST00000363566.1	5.95238	0.000108494	protein_coding	RP11-63P12.8-001	3.66667	0.000160214
protein_coding	AC015969.2-001	5.95238	0.000108494	protein_coding	RP11-436A20.1-001	3.66667	0.000160214
miRNA	hsa-mir-548aa-1	5.92857	0.00010806	protein_coding	RP11-305O6.1-001	3.66667	0.000160214
miRNA	hsa-mir-4429	5.92857	0.00010806	miRNA	hsa-mir-412	3.66667	0.000160214
other_TMapped	ENST00000365157.1	5.92857	0.00010806	other_TMapped	ENST00000540865.5	3.66667	0.000160214
protein_coding	CTD-3026N16.1-001	5.92857	0.00010806	other_TMapped	ENST00000529348.1	3.66667	0.000160214
protein_coding	AC005027.2-001	5.92857	0.00010806	other_TMapped	ENST00000390856.1	3.66667	0.000160214
other_TMapped	ENST00000625232.2	5.88095	0.000107192	protein_coding	AC009090.10-001	3.66667	0.000160214
other_TMapped	ENST00000559443.1	5.88095	0.000107192	protein_coding	U82671.15-004	3.64286	0.000159173
other_TMapped	ENST00000547854.1	5.88095	0.000107192	protein_coding	RP11-335O13.1-002	3.64286	0.000159173
protein_coding	AC005944.1-004	5.88095	0.000107192	protein_coding	PAQR5-201	3.64286	0.000159173
tRNA	tRNA-Met-CAT-6-1	5.85714	0.000106758	other_TMapped	ENST00000578934.1	3.64286	0.000159173
protein_coding	AC092117.10-003	5.85714	0.000106758	protein_coding	AC040162.22-011	3.64286	0.000159173
protein_coding	RP11-410F19.1-008	5.83333	0.000106324	protein_coding	AC009690.3-001	3.64286	0.000159173
protein_coding	RP1-68O2.1-001	5.83333	0.000106324	protein_coding	RP13-225O21.1-001	3.61905	0.000158133
protein_coding	AP005668.3-008	5.83333	0.000106324	protein_coding	CTD-2510G9.1-007	3.61905	0.000158133
other_TMapped	ENST00000563623.5	5.80952	0.00010589	protein_coding	AP000662.7-002	3.61905	0.000158133
protein_coding	RP11-212B22.1-002	5.78571	0.000105456	YRNA	RNY4P19-201	3.59524	0.000157093
protein_coding	RP1-93H18.2-014	5.78571	0.000105456	miRNA	hsa-mir-378f	3.59524	0.000157093
miRNA	hsa-mir-6503	5.78571	0.000105456	other_TMapped	ENST00000602478.1	3.59524	0.000157093
other_TMapped	ENST00000363005.1	5.78571	0.000105456	tRNA	tRNA-Asn-GTT-5-1	3.57143	0.000156052
other_TMapped	ENST00000612344.1	5.7619	0.000105022	protein_coding	RP11-89C21.1-001	3.57143	0.000156052
protein_coding	AL079303.7-002	5.7619	0.000105022	protein_coding	RP11-727A23.3-001	3.57143	0.000156052
tRNA	tRNA-Pro-CGG-1-3	5.7381	0.000104588	protein_coding	RP1-34B21.3-003	3.57143	0.000156052
protein_coding	RP11-82I1.4-003	5.7381	0.000104588	miRNA	hsa-mir-6813	3.57143	0.000156052
protein_coding	RP11-2I17.2-005	5.7381	0.000104588	other_TMapped	ENST00000484221.1	3.57143	0.000156052
protein_coding	RP11-1280I22.3-001	5.7381	0.000104588	tRNA	tRNA-Met-CAT-4-3	3.54762	0.000155012
other_TMapped	ENST00000384737.1	5.7381	0.000104588	protein_coding	RP3-337O18.8-001	3.54762	0.000155012
protein_coding	AC004906.1-011	5.7381	0.000104588	miRNA	hsa-mir-429	3.54762	0.000155012
miRNA	hsa-mir-6895	5.71429	0.000104154	other_TMapped	ENST00000550946.5	3.54762	0.000155012
protein_coding	AC019254.1-001	5.71429	0.000104154	other_TMapped	ENST00000426627.1	3.54762	0.000155012
miRNA	hsa-mir-6816	5.69048	0.00010372	protein_coding	TNNI1-207	3.52381	0.000153972
miRNA	hsa-mir-548ay	5.69048	0.00010372	protein_coding	RP5-1042K10.8-001	3.52381	0.000153972
other_TMapped	ENST00000602172.1	5.69048	0.00010372	protein_coding	RP11-787I22.2-002	3.52381	0.000153972
protein_coding	AC005626.2-002	5.69048	0.00010372	miRNA	hsa-mir-873	3.52381	0.000153972
tRNA	tRNA-Cys-GCA-20-1	5.66667	0.000103286	miRNA	hsa-mir-4755	3.52381	0.000153972
miRNA	hsa-mir-6832	5.66667	0.000103286	other_TMapped	ENST00000629869.1	3.52381	0.000153972
other_TMapped	ENST00000419069.1	5.66667	0.000103286	other_TMapped	ENST00000571763.5	3.52381	0.000153972
protein_coding	AC002985.1-001	5.66667	0.000103286	other_TMapped	ENST00000503946.1	3.52381	0.000153972
protein_coding	RP11-87C7.1-001	5.64286	0.000102852	protein_coding	CTD-2244F11.1-001	3.52381	0.000153972
protein_coding	RP11-844E22.2-003	5.64286	0.000102852	protein_coding	CTA-299D3.7-001	3.52381	0.000153972
protein_coding	MAGEA4-201	5.64286	0.000102852	protein_coding	RP11-197N18.1-010	3.5	0.000152931
other_TMapped	ENST00000434796.5	5.64286	0.000102852	miRNA	hsa-mir-3176	3.5	0.000152931
protein_coding	RP13-608F4.3-005	5.61905	0.000102418	protein_coding	AC018836.3-001	3.5	0.000152931
protein_coding	RP11-692M12.1-003	5.61905	0.000102418	miRNA	hsa-mir-6786	3.47619	0.000151891
protein_coding	RP11-141M3.4-003	5.61905	0.000102418	miRNA	hsa-mir-548ak	3.47619	0.000151891
other_TMapped	ENST00000391152.1	5.61905	0.000102418	other_TMapped	ENST00000577087.2	3.47619	0.000151891
protein_coding	RP1-249H1.1-001	5.59524	0.000101984	other_TMapped	ENST00000492744.3	3.47619	0.000151891
protein_coding	AC022007.2-005	5.59524	0.000101984	protein_coding	AC021593.2-001	3.47619	0.000151891
protein_coding	RP3-400N23.7-003	5.57143	0.00010155	tRNA	tRNA-Ile-GAT-1-3	3.45238	0.00015085
other_TMapped	ENST00000390851.1	5.57143	0.00010155	protein_coding	RP11-74E22.1-001	3.45238	0.00015085
protein_coding	RP11-86E10.1-001	5.54762	0.000101116	protein_coding	RP11-356O22.3-001	3.45238	0.00015085
protein_coding	RP11-132A1.5-007	5.54762	0.000101116	protein_coding	RP1-96H9.4-004	3.45238	0.00015085
other_TMapped	ENST00000391017.1	5.54762	0.000101116	miRNA	hsa-mir-6735	3.45238	0.00015085
other_TMapped	ENST00000362750.1	5.54762	0.000101116	piRNA	hsa_piR_004993|gb|DQ576880|Homo_sapiens	3.45238	0.00015085
protein_coding	RP3-438D16.3-001	5.52381	0.000100682	protein_coding	AC012360.5-006	3.45238	0.00015085
miRNA	hsa-mir-6877	5.52381	0.000100682	protein_coding	SNX12-206	3.42857	0.00014981
other_TMapped	ENST00000459424.1	5.52381	0.000100682	miRNA	hsa-mir-3115	3.42857	0.00014981
other_TMapped	ENST00000430270.5	5.52381	0.000100682	protein_coding	CTC-326K19.5-005	3.42857	0.00014981
protein_coding	AC104643.1-001	5.52381	0.000100682	tRNA	tRNA-Ala-AGC-1-1	3.40476	0.00014877
protein_coding	RP11-562N2.1-001	5.5	0.000100248	protein_coding	RP4-790G17.5-005	3.40476	0.00014877
protein_coding	RP11-392O18.1-002	5.5	0.000100248	protein_coding	RP11-968A15.4-001	3.40476	0.00014877
miRNA	hsa-mir-5586	5.5	0.000100248	protein_coding	RP11-815N9.1-001	3.40476	0.00014877
protein_coding	AC106782.10-001	5.5	0.000100248	protein_coding	RP1-171N11.1-001	3.40476	0.00014877
tRNA	tRNA-Gly-GCC-4-1	5.47619	9.98145e-05	miRNA	hsa-mir-1250	3.40476	0.00014877
protein_coding	RP11-646I6.2-012	5.47619	9.98145e-05	protein_coding	FOXO3-202	3.40476	0.00014877
protein_coding	RP11-432J22.4-001	5.45238	9.93805e-05	other_TMapped	ENST00000599648.1	3.40476	0.00014877
protein_coding	LA16c-314G4.3-001	5.45238	9.93805e-05	other_TMapped	ENST00000547563.1	3.40476	0.00014877
miRNA	hsa-mir-6885	5.45238	9.93805e-05	protein_coding	AC006388.4-001	3.40476	0.00014877
other_TMapped	ENST00000363301.1	5.45238	9.93805e-05	protein_coding	RP5-1167H4.3-002	3.38095	0.000147729
protein_coding	AC009852.1-001	5.45238	9.93805e-05	protein_coding	RP11-11C20.2-002	3.38095	0.000147729
protein_coding	RP11-73M18.1-001	5.42857	9.89465e-05	miRNA	hsa-mir-548w	3.38095	0.000147729
miRNA	hsa-mir-6758	5.42857	9.89465e-05	miRNA	hsa-mir-4708	3.38095	0.000147729
miRNA	hsa-mir-3146	5.42857	9.89465e-05	other_TMapped	ENST00000474934.1	3.38095	0.000147729
tRNA	tRNA-SeC-TCA-2-1	5.40476	9.85125e-05	other_TMapped	ENST00000446889.1	3.38095	0.000147729
protein_coding	RP11-1078H9.3-001	5.40476	9.85125e-05	protein_coding	RP11-99I12.1-001	3.35714	0.000146689
YRNA	RNY3P9-201	5.40476	9.85125e-05	protein_coding	RP11-148G20.3-005	3.35714	0.000146689
other_TMapped	ENST00000441655.2	5.40476	9.85125e-05	protein_coding	RP1-267L14.5-001	3.35714	0.000146689
other_TMapped	ENST00000384052.1	5.40476	9.85125e-05	miRNA	hsa-mir-491	3.35714	0.000146689
other_TMapped	ENST00000363435.1	5.40476	9.85125e-05	other_TMapped	ENST00000604760.1	3.35714	0.000146689
other_TMapped	ENST00000418039.2	5.38095	9.80786e-05	protein_coding	RP11-244E17.1-001	3.33333	0.000145649
protein_coding	AC005224.1-001	5.38095	9.80786e-05	other_TMapped	ENST00000519998.1	3.33333	0.000145649
other_TMapped	ENST00000461319.5	5.35714	9.76446e-05	other_TMapped	ENST00000493726.1	3.33333	0.000145649
tRNA	tRNA-Ala-AGC-11-1	5.33333	9.72106e-05	protein_coding	CTC-861O14.2-002	3.33333	0.000145649
other_TMapped	ENST00000487842.1	5.33333	9.72106e-05	protein_coding	TMEM179-206	3.30952	0.000144608
protein_coding	RP11-79P21.1-006	5.30952	9.67766e-05	protein_coding	RP11-66D24.1-001	3.30952	0.000144608
protein_coding	RP11-235C23.1-006	5.30952	9.67766e-05	protein_coding	KIAA1671-201	3.30952	0.000144608
protein_coding	RP11-108O10.5-001	5.30952	9.67766e-05	other_TMapped	ENST00000586937.2	3.30952	0.000144608
miRNA	hsa-mir-4449	5.30952	9.67766e-05	other_TMapped	ENST00000528017.1	3.30952	0.000144608
miRNA	hsa-mir-3912	5.30952	9.67766e-05	tRNA	tRNA-Ala-AGC-16-1	3.28571	0.000143568
other_TMapped	ENST00000616691.1	5.30952	9.67766e-05	protein_coding	RP11-431I8.1-002	3.28571	0.000143568
other_TMapped	ENST00000464067.1	5.30952	9.67766e-05	miRNA	hsa-mir-511	3.28571	0.000143568
protein_coding	AL352979.4-003	5.30952	9.67766e-05	miRNA	hsa-mir-1281	3.28571	0.000143568
protein_coding	RP11-71H17.2-001	5.28571	9.63427e-05	protein_coding	AL137230.3-001	3.28571	0.000143568
protein_coding	RP11-313L9.2-001	5.28571	9.63427e-05	protein_coding	RP5-1112D6.6-001	3.2619	0.000142528
miRNA	hsa-mir-6798	5.28571	9.63427e-05	miRNA	hsa-mir-874	3.2619	0.000142528
other_TMapped	ENST00000591467.1	5.28571	9.63427e-05	miRNA	hsa-mir-6763	3.2619	0.000142528
other_TMapped	ENST00000523485.5	5.28571	9.63427e-05	miRNA	hsa-mir-610	3.2619	0.000142528
protein_coding	AC004258.6-005	5.28571	9.63427e-05	miRNA	hsa-mir-4676	3.2619	0.000142528
protein_coding	RP11-429A20.1-001	5.2619	9.59087e-05	piRNA	hsa_piR_020582|gb|DQ598312|Homo_sapiens	3.2619	0.000142528
miRNA	hsa-mir-6729	5.2381	9.54747e-05	other_TMapped	ENST00000623177.1	3.2619	0.000142528
miRNA	hsa-mir-4645	5.2381	9.54747e-05	protein_coding	DMBT1-207	3.2619	0.000142528
other_TMapped	ENST00000602361.1	5.2381	9.54747e-05	protein_coding	AC006023.6-009	3.2619	0.000142528
other_TMapped	ENST00000380931.6	5.2381	9.54747e-05	protein_coding	ST3GAL1-201	3.2381	0.000141487
other_TMapped	ENST00000364581.1	5.2381	9.54747e-05	protein_coding	RP11-377G16.1-001	3.2381	0.000141487
protein_coding	AP001157.4-002	5.2381	9.54747e-05	other_TMapped	ENST00000464324.5	3.2381	0.000141487
protein_coding	RP11-566D24.2-001	5.21429	9.50407e-05	other_TMapped	ENST00000377178.3	3.2381	0.000141487
protein_coding	RP11-552F3.1-002	5.21429	9.50407e-05	other_TMapped	ENST00000365274.1	3.2381	0.000141487
other_TMapped	ENST00000430785.1	5.21429	9.50407e-05	protein_coding	CTB-174O21.1-021	3.2381	0.000141487
protein_coding	AC074121.3-001	5.21429	9.50407e-05	protein_coding	XXbac-BPG34K20.2-001	3.21429	0.000140447
protein_coding	RP11-178G16.3-002	5.19048	9.46067e-05	protein_coding	RP11-91K11.3-001	3.21429	0.000140447
protein_coding	RP11-13A2.3-006	5.19048	9.46067e-05	protein_coding	RP11-823E8.2-001	3.21429	0.000140447
tRNA	tRNA-Val-TAC-1-1	5.16667	9.41728e-05	protein_coding	RP11-71H17.2-001	3.21429	0.000140447
miRNA	hsa-mir-659	5.16667	9.41728e-05	piRNA	hsa_piR_001042|gb|DQ571335|Homo_sapiens	3.21429	0.000140447
other_TMapped	ENST00000522827.1	5.16667	9.41728e-05	other_TMapped	ENST00000491724.1	3.21429	0.000140447
protein_coding	AC013448.3-002	5.16667	9.41728e-05	protein_coding	AL352979.4-003	3.21429	0.000140447
protein_coding	RP11-658F2.1-002	5.14286	9.37388e-05	protein_coding	AL135749.1-001	3.21429	0.000140447
YRNA	RNY3P8-201	5.14286	9.37388e-05	protein_coding	AC113133.2-002	3.21429	0.000140447
other_TMapped	ENST00000602478.1	5.14286	9.37388e-05	protein_coding	AC006042.4-001	3.21429	0.000140447
other_TMapped	ENST00000364696.1	5.14286	9.37388e-05	protein_coding	VDAC2-214	3.19048	0.000139407
protein_coding	RP11-571M6.14-001	5.11905	9.33048e-05	tRNA	tRNA-Gln-TTG-2-1	3.19048	0.000139407
piRNA	hsa_piR_001169|gb|DQ571525|Homo_sapiens	5.11905	9.33048e-05	protein_coding	RP11-466L14.1-013	3.19048	0.000139407
other_TMapped	ENST00000602282.2	5.11905	9.33048e-05	other_TMapped	ENST00000646170.1	3.19048	0.000139407
protein_coding	CTD-2529P6.1-001	5.11905	9.33048e-05	other_TMapped	ENST00000601451.5	3.19048	0.000139407
miRNA	hsa-mir-579	5.09524	9.28708e-05	other_TMapped	ENST00000544339.1	3.19048	0.000139407
protein_coding	RP11-599B13.1-004	5.07143	9.24369e-05	protein_coding	XX-FW83563B9.3-006	3.16667	0.000138366
protein_coding	AC093899.4-005	5.07143	9.24369e-05	protein_coding	RP11-548O1.2-001	3.16667	0.000138366
protein_coding	RP11-117L5.2-001	5.04762	9.20029e-05	protein_coding	RP11-465K4.2-004	3.16667	0.000138366
miRNA	hsa-mir-665	5.04762	9.20029e-05	protein_coding	RP11-21L23.1-004	3.16667	0.000138366
miRNA	hsa-mir-4632	5.04762	9.20029e-05	protein_coding	RP11-134G8.1-002	3.16667	0.000138366
other_TMapped	ENST00000601801.3	5.04762	9.20029e-05	miRNA	hsa-mir-1185-1	3.16667	0.000138366
other_TMapped	ENST00000576171.1	5.04762	9.20029e-05	other_TMapped	ENST00000507781.1	3.16667	0.000138366
other_TMapped	ENST00000516408.1	5.04762	9.20029e-05	other_TMapped	ENST00000441655.2	3.16667	0.000138366
protein_coding	AC011500.11-003	5.04762	9.20029e-05	protein_coding	CTD-2589J4.2-003	3.16667	0.000138366
protein_coding	RP11-102P23.1-001	5.02381	9.15689e-05	protein_coding	AC106886.6-012	3.16667	0.000138366
miRNA	hsa-mir-708	5.02381	9.15689e-05	protein_coding	AC090286.3-003	3.16667	0.000138366
miRNA	hsa-mir-378e	5.02381	9.15689e-05	protein_coding	AC020894.1-007	3.16667	0.000138366
miRNA	hsa-mir-6726	5	9.11349e-05	protein_coding	AC007036.3-002	3.16667	0.000138366
other_TMapped	ENST00000534610.5	5	9.11349e-05	protein_coding	RP1-281H8.5-003	3.14286	0.000137326
other_TMapped	ENST00000498313.5	5	9.11349e-05	protein_coding	LY6G6E-225	3.14286	0.000137326
protein_coding	CTC-251H24.11-013	5	9.11349e-05	miRNA	hsa-mir-3180-4	3.14286	0.000137326
protein_coding	RP11-670E13.4-001	4.95238	9.0267e-05	other_TMapped	ENST00000578711.1	3.14286	0.000137326
protein_coding	RP11-431I8.1-002	4.95238	9.0267e-05	other_TMapped	ENST00000568314.1	3.14286	0.000137326
protein_coding	RP11-356O22.3-001	4.95238	9.0267e-05	protein_coding	RP3-486I3.3-001	3.11905	0.000136286
protein_coding	RP11-158L12.1-001	4.95238	9.0267e-05	protein_coding	RP11-284N8.1-008	3.11905	0.000136286
miRNA	hsa-mir-96	4.95238	9.0267e-05	protein_coding	RP11-112L15.1-001	3.11905	0.000136286
other_TMapped	ENST00000364481.1	4.95238	9.0267e-05	protein_coding	RP1-63M2.2-001	3.11905	0.000136286
other_TMapped	ENST00000364407.1	4.95238	9.0267e-05	miRNA	hsa-mir-6767	3.11905	0.000136286
protein_coding	AF030876.1-002	4.95238	9.0267e-05	miRNA	hsa-mir-5090	3.11905	0.000136286
protein_coding	AC090844.6-001	4.95238	9.0267e-05	piRNA	hsa_piR_010791|gb|DQ584559|Homo_sapiens	3.11905	0.000136286
protein_coding	AC005321.1-009	4.95238	9.0267e-05	other_TMapped	ENST00000625269.1	3.11905	0.000136286
protein_coding	AC004686.3-001	4.95238	9.0267e-05	other_TMapped	ENST00000619449.2	3.11905	0.000136286
protein_coding	RP11-413G22.1-001	4.92857	8.9833e-05	other_TMapped	ENST00000594081.1	3.11905	0.000136286
other_TMapped	ENST00000555130.1	4.92857	8.9833e-05	other_TMapped	ENST00000529209.1	3.11905	0.000136286
other_TMapped	ENST00000511920.1	4.92857	8.9833e-05	protein_coding	AP005329.2-001	3.11905	0.000136286
other_TMapped	ENST00000473385.1	4.92857	8.9833e-05	protein_coding	RP4-697K14.7-003	3.09524	0.000135245
protein_coding	RP4-728D4.1-003	4.90476	8.9399e-05	protein_coding	RP11-84H15.2-002	3.09524	0.000135245
protein_coding	MTMR2-203	4.90476	8.9399e-05	protein_coding	RP11-362A9.1-008	3.09524	0.000135245
protein_coding	RP11-297O4.1-001	4.88095	8.89651e-05	protein_coding	RP11-154J22.2-001	3.09524	0.000135245
protein_coding	RP11-700F16.4-007	4.85714	8.85311e-05	protein_coding	RP11-112L6.1-001	3.09524	0.000135245
protein_coding	RP11-546M21.1-005	4.85714	8.85311e-05	YRNA	RNY3P1-201	3.09524	0.000135245
protein_coding	RP11-342I1.1-001	4.85714	8.85311e-05	miRNA	hsa-mir-5009	3.09524	0.000135245
other_TMapped	ENST00000460565.2	4.85714	8.85311e-05	other_TMapped	ENST00000602976.1	3.09524	0.000135245
protein_coding	TNNI1-207	4.83333	8.80971e-05	other_TMapped	ENST00000480929.1	3.09524	0.000135245
miRNA	hsa-mir-3198-2	4.83333	8.80971e-05	protein_coding	AP000358.4-002	3.09524	0.000135245
other_TMapped	ENST00000408612.1	4.83333	8.80971e-05	tRNA	tRNA-Asn-GTT-6-1	3.07143	0.000134205
protein_coding	LENG8-209	4.80952	8.76631e-05	protein_coding	RP11-631M21.2-002	3.07143	0.000134205
protein_coding	KB-1153C10.1-015	4.80952	8.76631e-05	other_TMapped	ENST00000635408.1	3.07143	0.000134205
other_TMapped	ENST00000595467.1	4.80952	8.76631e-05	other_TMapped	ENST00000515217.1	3.07143	0.000134205
other_TMapped	ENST00000590268.1	4.80952	8.76631e-05	other_TMapped	ENST00000469300.6	3.07143	0.000134205
other_TMapped	ENST00000484550.1	4.80952	8.76631e-05	other_TMapped	ENST00000408314.1	3.07143	0.000134205
miRNA	hsa-mir-6817	4.78571	8.72292e-05	other_TMapped	ENST00000365193.1	3.07143	0.000134205
protein_coding	WRNIP1-205	4.7619	8.67952e-05	protein_coding	CTA-286B10.5-008	3.07143	0.000134205
miRNA	hsa-mir-937	4.7619	8.67952e-05	protein_coding	AC124068.2-001	3.07143	0.000134205
other_TMapped	ENST00000384413.1	4.7619	8.67952e-05	protein_coding	AC099057.4-017	3.07143	0.000134205
protein_coding	RP11-399J11.3-003	4.7381	8.63612e-05	protein_coding	XX-FW83563B9.1-015	3.04762	0.000133165
protein_coding	CTD-3193O13.9-002	4.7381	8.63612e-05	protein_coding	RP4-534D1.4-001	3.04762	0.000133165
protein_coding	AC108004.1-015	4.7381	8.63612e-05	protein_coding	RP11-175O19.1-015	3.04762	0.000133165
protein_coding	RP11-3D4.1-009	4.71429	8.59272e-05	miRNA	hsa-mir-1256	3.04762	0.000133165
protein_coding	RP1-237K10.1-001	4.71429	8.59272e-05	piRNA	hsa_piR_004801|gb|DQ576605|Homo_sapiens	3.04762	0.000133165
other_TMapped	ENST00000644426.1	4.71429	8.59272e-05	other_TMapped	ENST00000636354.1	3.04762	0.000133165
protein_coding	RP11-144G6.1-004	4.69048	8.54933e-05	other_TMapped	ENST00000573376.1	3.04762	0.000133165
miRNA	hsa-mir-4422	4.69048	8.54933e-05	protein_coding	AC020663.8-001	3.04762	0.000133165
protein_coding	ESPNL-206	4.69048	8.54933e-05	tRNA	tRNA-Arg-CCT-4-1	3.02381	0.000132124
other_TMapped	ENST00000390856.1	4.69048	8.54933e-05	protein_coding	RP11-889L3.3-001	3.02381	0.000132124
other_TMapped	ENST00000383884.1	4.69048	8.54933e-05	protein_coding	RP11-348N5.2-001	3.02381	0.000132124
other_TMapped	ENST00000365512.1	4.69048	8.54933e-05	other_TMapped	ENST00000410692.1	3.02381	0.000132124
protein_coding	CTD-2360A17.1-002	4.69048	8.54933e-05	protein_coding	CTA-256D12.3-010	3.02381	0.000132124
protein_coding	AC073610.3-001	4.69048	8.54933e-05	protein_coding	AC009948.9-022	3.02381	0.000132124
protein_coding	RP13-820C6.3-001	4.66667	8.50593e-05	protein_coding	WNK3-201	3	0.000131084
miRNA	hsa-mir-4533	4.66667	8.50593e-05	protein_coding	U52111.5-005	3	0.000131084
other_TMapped	ENST00000586054.2	4.66667	8.50593e-05	miRNA	hsa-mir-4525	3	0.000131084
protein_coding	AC007036.3-002	4.66667	8.50593e-05	miRNA	hsa-mir-1238	3	0.000131084
other_TMapped	ENST00000569238.1	4.64286	8.46253e-05	other_TMapped	ENST00000511103.1	3	0.000131084
protein_coding	AC012146.4-002	4.64286	8.46253e-05	other_TMapped	ENST00000465524.5	3	0.000131084
protein_coding	AC011533.2-001	4.64286	8.46253e-05	other_TMapped	ENST00000424349.1	3	0.000131084
protein_coding	CYTH2-213	4.61905	8.41913e-05	protein_coding	AC131097.1-001	3	0.000131084
protein_coding	XXbac-BPG254B15.9-008	4.59524	8.37574e-05	protein_coding	AC093513.6-001	3	0.000131084
miRNA	hsa-mir-935	4.59524	8.37574e-05	protein_coding	XXbac-BPG1H2.4-001	2.97619	0.000130044
miRNA	hsa-mir-4435-2	4.59524	8.37574e-05	protein_coding	TBC1D1-219	2.97619	0.000130044
other_TMapped	ENST00000599648.1	4.59524	8.37574e-05	protein_coding	RP5-1104E15.8-001	2.97619	0.000130044
other_TMapped	ENST00000527295.5	4.59524	8.37574e-05	protein_coding	RP11-811I7.1-001	2.97619	0.000130044
other_TMapped	ENST00000362935.1	4.59524	8.37574e-05	protein_coding	RP11-36N22.4-001	2.97619	0.000130044
protein_coding	AC016700.1-001	4.59524	8.37574e-05	protein_coding	RP11-331F9.7-001	2.97619	0.000130044
protein_coding	RP11-97E23.2-003	4.57143	8.33234e-05	protein_coding	RP11-269C23.2-001	2.97619	0.000130044
protein_coding	RP11-933I1.1-001	4.57143	8.33234e-05	other_TMapped	ENST00000509041.5	2.97619	0.000130044
protein_coding	RP11-156G14.2-001	4.57143	8.33234e-05	protein_coding	AP000688.10-006	2.97619	0.000130044
miRNA	hsa-mir-1227	4.57143	8.33234e-05	protein_coding	AC013791.8-005	2.97619	0.000130044
other_TMapped	ENST00000564809.1	4.57143	8.33234e-05	protein_coding	AC011500.11-003	2.97619	0.000130044
tRNA	tRNA-Gln-CTG-1-1	4.54762	8.28894e-05	other_TMapped	ENST00000579553.1	2.95238	0.000129003
protein_coding	RP13-577J18.1-002	4.54762	8.28894e-05	other_TMapped	ENST00000564379.1	2.95238	0.000129003
protein_coding	RP11-697H9.1-001	4.54762	8.28894e-05	other_TMapped	ENST00000384592.1	2.95238	0.000129003
protein_coding	RP11-241K3.1-002	4.54762	8.28894e-05	protein_coding	AC127537.3-019	2.95238	0.000129003
protein_coding	RP11-239B6.1-001	4.54762	8.28894e-05	protein_coding	AC011461.6-004	2.95238	0.000129003
miRNA	hsa-mir-429	4.54762	8.28894e-05	protein_coding	AC009118.6-009	2.95238	0.000129003
miRNA	hsa-mir-3909	4.54762	8.28894e-05	protein_coding	Z97630.3-001	2.92857	0.000127963
other_TMapped	ENST00000629536.1	4.54762	8.28894e-05	protein_coding	RP4-800J21.1-001	2.92857	0.000127963
other_TMapped	ENST00000516795.1	4.54762	8.28894e-05	protein_coding	RP1-237K10.1-001	2.92857	0.000127963
other_TMapped	ENST00000460537.3	4.54762	8.28894e-05	miRNA	hsa-mir-6847	2.92857	0.000127963
tRNA	tRNA-Ile-AAT-6-1	4.52381	8.24554e-05	protein_coding	FAM20A-207	2.92857	0.000127963
protein_coding	RP11-498E2.1-001	4.52381	8.24554e-05	other_TMapped	ENST00000463779.3	2.92857	0.000127963
protein_coding	RP11-179G5.2-001	4.52381	8.24554e-05	protein_coding	AC106782.8-001	2.92857	0.000127963
miRNA	hsa-mir-6763	4.52381	8.24554e-05	tRNA	tRNA-Tyr-GTA-7-1	2.90476	0.000126922
miRNA	hsa-mir-3150a	4.52381	8.24554e-05	miRNA	hsa-mir-5584	2.90476	0.000126922
other_TMapped	ENST00000636354.1	4.52381	8.24554e-05	miRNA	hsa-mir-1343	2.90476	0.000126922
other_TMapped	ENST00000581764.1	4.52381	8.24554e-05	miRNA	hsa-mir-1275	2.90476	0.000126922
protein_coding	AC080089.1-002	4.52381	8.24554e-05	other_TMapped	ENST00000512928.1	2.90476	0.000126922
protein_coding	RP5-943F2.2-001	4.5	8.20214e-05	other_TMapped	ENST00000440150.5	2.90476	0.000126922
protein_coding	RP11-625L16.2-001	4.5	8.20214e-05	YRNA	RNY1P1-201	2.88095	0.000125882
protein_coding	RP11-600N23.2-013	4.5	8.20214e-05	miRNA	hsa-mir-4785	2.88095	0.000125882
protein_coding	RP11-38P22.1-001	4.5	8.20214e-05	miRNA	hsa-mir-329-2	2.88095	0.000125882
miRNA	hsa-mir-5583-2	4.5	8.20214e-05	miRNA	hsa-mir-3198-2	2.88095	0.000125882
piRNA	hsa_piR_001168|gb|DQ571524|Homo_sapiens	4.5	8.20214e-05	other_TMapped	ENST00000471270.5	2.88095	0.000125882
other_TMapped	ENST00000364684.1	4.5	8.20214e-05	other_TMapped	ENST00000466982.1	2.88095	0.000125882
protein_coding	CTD-2589J4.4-006	4.5	8.20214e-05	other_TMapped	ENST00000364578.1	2.88095	0.000125882
protein_coding	AC005213.3-001	4.5	8.20214e-05	other_TMapped	ENST00000364044.1	2.88095	0.000125882
protein_coding	RP13-563D5.1-004	4.47619	8.15875e-05	protein_coding	CTA-268H5.11-001	2.88095	0.000125882
protein_coding	RP11-88G17.4-001	4.47619	8.15875e-05	protein_coding	AC005328.4-009	2.88095	0.000125882
miRNA	hsa-mir-9985	4.47619	8.15875e-05	tRNA	tRNA-Pro-TGG-2-1	2.85714	0.000124842
miRNA	hsa-mir-3176	4.47619	8.15875e-05	miRNA	hsa-mir-1197	2.85714	0.000124842
other_TMapped	ENST00000363651.1	4.47619	8.15875e-05	piRNA	hsa_piR_020500|gb|DQ598190|Homo_sapiens	2.85714	0.000124842
protein_coding	RP11-701H16.1-002	4.45238	8.11535e-05	other_TMapped	ENST00000639461.1	2.85714	0.000124842
protein_coding	RP11-641I15.1-005	4.45238	8.11535e-05	other_TMapped	ENST00000416553.1	2.85714	0.000124842
protein_coding	RP3-402L9.1-020	4.42857	8.07195e-05	protein_coding	CTC-487M23.3-001	2.85714	0.000124842
other_TMapped	ENST00000517013.1	4.42857	8.07195e-05	protein_coding	AC026407.2-001	2.85714	0.000124842
other_TMapped	ENST00000475653.5	4.42857	8.07195e-05	protein_coding	XXbac-BPG13B8.3-002	2.83333	0.000123801
other_TMapped	ENST00000317902.7	4.42857	8.07195e-05	protein_coding	RP11-792G9.2-001	2.83333	0.000123801
protein_coding	NKX2-3-202	4.40476	8.02855e-05	protein_coding	RP11-603J24.2-005	2.83333	0.000123801
miRNA	hsa-mir-1197	4.40476	8.02855e-05	protein_coding	RP11-500M8.3-001	2.83333	0.000123801
other_TMapped	ENST00000363688.1	4.40476	8.02855e-05	miRNA	hsa-mir-3179-4	2.83333	0.000123801
protein_coding	XXbac-BPG27H4.4-001	4.35714	7.94176e-05	miRNA	hsa-mir-141	2.83333	0.000123801
protein_coding	MAMLD1-204	4.35714	7.94176e-05	piRNA	hsa_piR_020793|gb|DQ598619|Homo_sapiens	2.83333	0.000123801
protein_coding	KB-1198A4.1-006	4.35714	7.94176e-05	other_TMapped	ENST00000363244.1	2.83333	0.000123801
miRNA	hsa-mir-6769b	4.35714	7.94176e-05	other_TMapped	ENST00000363046.1	2.83333	0.000123801
protein_coding	CTD-2314I6.2-003	4.35714	7.94176e-05	other_TMapped	ENST00000362761.1	2.83333	0.000123801
protein_coding	ADGRF1-201	4.35714	7.94176e-05	protein_coding	CTD-3065J16.4-008	2.83333	0.000123801
tRNA	tRNA-Pro-CGG-1-1	4.33333	7.89836e-05	protein_coding	AC069444.3-001	2.83333	0.000123801
protein_coding	RP11-467E3.2-001	4.33333	7.89836e-05	protein_coding	AC022007.2-005	2.83333	0.000123801
protein_coding	RP11-25C19.2-001	4.33333	7.89836e-05	protein_coding	TTC8-207	2.80952	0.000122761
other_TMapped	ENST00000539498.1	4.33333	7.89836e-05	protein_coding	RP5-850E9.3-001	2.80952	0.000122761
other_TMapped	ENST00000508873.1	4.33333	7.89836e-05	other_TMapped	ENST00000642861.1	2.80952	0.000122761
other_TMapped	ENST00000479945.1	4.33333	7.89836e-05	other_TMapped	ENST00000556973.1	2.80952	0.000122761
protein_coding	AC016734.1-001	4.33333	7.89836e-05	protein_coding	AC069523.15-004	2.80952	0.000122761
tRNA	tRNA-Lys-CTT-9-1	4.30952	7.85496e-05	protein_coding	AC034198.2-005	2.80952	0.000122761
other_TMapped	ENST00000605265.1	4.30952	7.85496e-05	tRNA	tRNA-Ala-AGC-7-1	2.78571	0.000121721
other_TMapped	ENST00000362554.1	4.30952	7.85496e-05	protein_coding	RP5-895C5.1-007	2.78571	0.000121721
protein_coding	AC092296.2-001	4.30952	7.85496e-05	protein_coding	RP11-84A1.2-001	2.78571	0.000121721
tRNA	tRNA-Trp-CCA-5-1	4.28571	7.81157e-05	protein_coding	RP11-148L5.2-002	2.78571	0.000121721
miRNA	hsa-mir-5584	4.28571	7.81157e-05	other_TMapped	ENST00000494227.3	2.78571	0.000121721
other_TMapped	ENST00000411383.1	4.28571	7.81157e-05	tRNA	tRNA-Lys-CTT-7-1	2.7619	0.00012068
other_TMapped	ENST00000410708.1	4.28571	7.81157e-05	protein_coding	RP11-49P4.5-001	2.7619	0.00012068
protein_coding	AC006946.11-001	4.28571	7.81157e-05	miRNA	hsa-mir-3158-1	2.7619	0.00012068
protein_coding	RP11-452G18.3-016	4.2619	7.76817e-05	protein_coding	CTD-2140B24.5-001	2.7619	0.00012068
miRNA	hsa-mir-4762	4.2619	7.76817e-05	protein_coding	CTD-2013N17.5-008	2.7619	0.00012068
protein_coding	DROSHA-202	4.2619	7.76817e-05	protein_coding	AC024060.2-004	2.7619	0.00012068
protein_coding	RP11-573G6.1-001	4.2381	7.72477e-05	miRNA	hsa-mir-4677	2.7381	0.00011964
other_TMapped	ENST00000436123.1	4.2381	7.72477e-05	other_TMapped	ENST00000646046.1	2.7381	0.00011964
other_TMapped	ENST00000415758.1	4.2381	7.72477e-05	other_TMapped	ENST00000606622.1	2.7381	0.00011964
protein_coding	CTC-251H24.13-012	4.2381	7.72477e-05	other_TMapped	ENST00000415758.1	2.7381	0.00011964
protein_coding	AC122713.4-007	4.2381	7.72477e-05	protein_coding	CTD-3064H18.3-001	2.7381	0.00011964
protein_coding	AC094107.3-003	4.2381	7.72477e-05	protein_coding	CTD-2619J13.28-001	2.7381	0.00011964
protein_coding	AC002543.3-005	4.2381	7.72477e-05	protein_coding	AC093214.4-001	2.7381	0.00011964
tRNA	tRNA-Leu-TAA-2-1	4.21429	7.68137e-05	protein_coding	Z84721.1-001	2.71429	0.0001186
protein_coding	RP11-510N19.1-002	4.21429	7.68137e-05	protein_coding	RP11-793H13.2-006	2.71429	0.0001186
protein_coding	RP11-503K16.1-012	4.21429	7.68137e-05	protein_coding	RP11-74A12.1-014	2.71429	0.0001186
piRNA	hsa_piR_002468|gb|DQ573323|Homo_sapiens	4.21429	7.68137e-05	protein_coding	RP11-379F12.6-003	2.71429	0.0001186
other_TMapped	ENST00000469300.6	4.21429	7.68137e-05	other_TMapped	ENST00000628590.1	2.71429	0.0001186
other_TMapped	ENST00000463397.3	4.21429	7.68137e-05	other_TMapped	ENST00000534945.2	2.71429	0.0001186
protein_coding	AC007249.2-002	4.21429	7.68137e-05	other_TMapped	ENST00000514186.5	2.71429	0.0001186
protein_coding	AC006388.4-001	4.21429	7.68137e-05	other_TMapped	ENST00000510822.1	2.71429	0.0001186
protein_coding	TCF7L2-216	4.19048	7.63798e-05	protein_coding	CTD-2517O10.2-001	2.71429	0.0001186
protein_coding	RP11-112J3.1-001	4.19048	7.63798e-05	protein_coding	CTB-161A2.6-002	2.71429	0.0001186
protein_coding	RP11-107D16.3-001	4.19048	7.63798e-05	protein_coding	RP5-1119A7.12-007	2.69048	0.000117559
miRNA	hsa-mir-6859-4	4.19048	7.63798e-05	protein_coding	RP11-472N19.2-001	2.69048	0.000117559
miRNA	hsa-mir-6855	4.19048	7.63798e-05	protein_coding	RP11-1146N6.1-015	2.69048	0.000117559
protein_coding	CTD-3035K23.5-008	4.19048	7.63798e-05	protein_coding	RP1-249H1.1-001	2.69048	0.000117559
protein_coding	CSMD2-210	4.19048	7.63798e-05	miRNA	hsa-mir-4654	2.69048	0.000117559
protein_coding	AP001462.2-001	4.19048	7.63798e-05	protein_coding	AC074130.2-001	2.69048	0.000117559
protein_coding	AC144556.1-001	4.19048	7.63798e-05	protein_coding	AC015982.1-003	2.69048	0.000117559
protein_coding	AC136007.1-001	4.19048	7.63798e-05	protein_coding	RP11-4K3__A.1-001	2.66667	0.000116519
protein_coding	RP3-431A14.2-002	4.16667	7.59458e-05	protein_coding	RP11-247L20.1-003	2.66667	0.000116519
protein_coding	SNX12-206	4.14286	7.55118e-05	protein_coding	RP11-181L23.6-011	2.66667	0.000116519
protein_coding	RP11-66D24.1-001	4.14286	7.55118e-05	miRNA	hsa-mir-708	2.66667	0.000116519
miRNA	hsa-mir-548ak	4.14286	7.55118e-05	miRNA	hsa-mir-4647	2.66667	0.000116519
miRNA	hsa-mir-4785	4.14286	7.55118e-05	miRNA	hsa-mir-3679	2.66667	0.000116519
protein_coding	AC124781.1-004	4.14286	7.55118e-05	other_TMapped	ENST00000449895.5	2.66667	0.000116519
protein_coding	RP11-715N9.1-001	4.11905	7.50778e-05	protein_coding	RP11-625L16.2-001	2.64286	0.000115479
other_TMapped	ENST00000441006.5	4.11905	7.50778e-05	protein_coding	RP11-407H12.2-001	2.64286	0.000115479
tRNA	tRNA-Leu-CAA-1-1	4.09524	7.46439e-05	miRNA	hsa-mir-4743	2.64286	0.000115479
protein_coding	RP11-659E9.1-001	4.09524	7.46439e-05	other_TMapped	ENST00000356215.5	2.64286	0.000115479
protein_coding	RP11-357H14.3-001	4.09524	7.46439e-05	protein_coding	AP002956.3-004	2.64286	0.000115479
protein_coding	RP11-325J6.1-004	4.09524	7.46439e-05	protein_coding	AC005027.2-001	2.64286	0.000115479
miRNA	hsa-mir-378f	4.09524	7.46439e-05	tRNA	tRNA-Pro-CGG-1-1	2.61905	0.000114438
other_TMapped	ENST00000638132.1	4.09524	7.46439e-05	tRNA	tRNA-Cys-GCA-20-1	2.61905	0.000114438
other_TMapped	ENST00000525114.1	4.09524	7.46439e-05	protein_coding	ST3GAL2-201	2.61905	0.000114438
other_TMapped	ENST00000430998.6	4.09524	7.46439e-05	protein_coding	RP5-1007M22.1-005	2.61905	0.000114438
protein_coding	AC019068.1-001	4.09524	7.46439e-05	miRNA	hsa-mir-6826	2.61905	0.000114438
tRNA	tRNA-Leu-AAG-2-1	4.07143	7.42099e-05	miRNA	hsa-mir-548ad	2.61905	0.000114438
protein_coding	RP11-49P4.5-001	4.07143	7.42099e-05	miRNA	hsa-mir-4657	2.61905	0.000114438
protein_coding	RP11-212K13.1-001	4.07143	7.42099e-05	other_TMapped	ENST00000494299.1	2.61905	0.000114438
protein_coding	MUC15-201	4.07143	7.42099e-05	other_TMapped	ENST00000461319.5	2.61905	0.000114438
other_TMapped	ENST00000397772.2	4.07143	7.42099e-05	other_TMapped	ENST00000363188.1	2.61905	0.000114438
other_TMapped	ENST00000363981.1	4.07143	7.42099e-05	protein_coding	AC011825.2-009	2.61905	0.000114438
protein_coding	AC110809.4-002	4.07143	7.42099e-05	protein_coding	AC007277.1-005	2.61905	0.000114438
tRNA	tRNA-Trp-CCA-3-3	4.04762	7.37759e-05	protein_coding	AC002985.1-001	2.61905	0.000114438
protein_coding	RP11-1012A1.6-002	4.04762	7.37759e-05	protein_coding	RP11-178C10.1-001	2.59524	0.000113398
other_TMapped	ENST00000477425.1	4.04762	7.37759e-05	miRNA	hsa-mir-7108	2.59524	0.000113398
protein_coding	RP11-472N19.2-001	4.02381	7.33419e-05	other_TMapped	ENST00000607097.1	2.59524	0.000113398
protein_coding	RP1-273F20.1-001	4.02381	7.33419e-05	other_TMapped	ENST00000580533.1	2.59524	0.000113398
protein_coding	RP1-160A22.3-001	4.02381	7.33419e-05	protein_coding	CTB-175E5.6-002	2.59524	0.000113398
miRNA	hsa-mir-6894	4.02381	7.33419e-05	protein_coding	AC125362.3-001	2.59524	0.000113398
protein_coding	AC084702.1-001	4.02381	7.33419e-05	protein_coding	AC005752.6-001	2.59524	0.000113398
protein_coding	AC025180.1-001	4.02381	7.33419e-05	protein_coding	XXbac-BPG254B15.9-009	2.57143	0.000112358
protein_coding	MICAL2-204	4	7.2908e-05	tRNA	tRNA-Ile-AAT-7-1	2.57143	0.000112358
miRNA	hsa-mir-6770-3	4	7.2908e-05	protein_coding	RP4-700P11.1-001	2.57143	0.000112358
other_TMapped	ENST00000577346.1	4	7.2908e-05	protein_coding	RP11-400F19.3-002	2.57143	0.000112358
other_TMapped	ENST00000384677.1	4	7.2908e-05	protein_coding	RP11-261N11.1-023	2.57143	0.000112358
protein_coding	AC097473.1-008	4	7.2908e-05	piRNA	hsa_piR_022628|gb|DQ600952|Homo_sapiens	2.57143	0.000112358
protein_coding	AC000093.4-014	4	7.2908e-05	other_TMapped	ENST00000623486.1	2.57143	0.000112358
tRNA	tRNA-Pro-CGG-2-1	3.97619	7.2474e-05	other_TMapped	ENST00000571033.1	2.57143	0.000112358
protein_coding	RP11-603J24.2-005	3.97619	7.2474e-05	other_TMapped	ENST00000509244.1	2.57143	0.000112358
protein_coding	RP11-47A8.4-001	3.97619	7.2474e-05	other_TMapped	ENST00000469129.1	2.57143	0.000112358
protein_coding	RP11-163B6.3-002	3.97619	7.2474e-05	protein_coding	AC126915.1-001	2.57143	0.000112358
other_TMapped	ENST00000617626.1	3.97619	7.2474e-05	protein_coding	AC007249.2-002	2.57143	0.000112358
other_TMapped	ENST00000571815.1	3.97619	7.2474e-05	protein_coding	AC003972.1-002	2.57143	0.000112358
other_TMapped	ENST00000384384.1	3.97619	7.2474e-05	protein_coding	XXbac-BPG157A10.20-007	2.54762	0.000111317
protein_coding	AP001443.4-001	3.97619	7.2474e-05	tRNA	tRNA-Pro-AGG-2-1	2.54762	0.000111317
protein_coding	AC087491.4-001	3.97619	7.2474e-05	protein_coding	RP11-360E11.1-002	2.54762	0.000111317
tRNA	tRNA-Arg-CCT-2-1	3.95238	7.204e-05	protein_coding	RP11-218L14.1-001	2.54762	0.000111317
tRNA	tRNA-Ala-AGC-8-2	3.95238	7.204e-05	protein_coding	RP1-159A15.1-001	2.54762	0.000111317
protein_coding	RP11-405F3.3-067	3.95238	7.204e-05	miRNA	hsa-mir-3912	2.54762	0.000111317
protein_coding	RP11-244E17.1-001	3.95238	7.204e-05	other_TMapped	ENST00000622550.2	2.54762	0.000111317
protein_coding	RP11-17E13.1-002	3.95238	7.204e-05	other_TMapped	ENST00000442996.1	2.54762	0.000111317
protein_coding	RP11-112L6.1-001	3.95238	7.204e-05	other_TMapped	ENST00000384024.1	2.54762	0.000111317
protein_coding	RP1-170O19.13-001	3.95238	7.204e-05	protein_coding	AC005618.2-001	2.54762	0.000111317
miRNA	hsa-mir-6716	3.95238	7.204e-05	tRNA	tRNA-Ser-CGA-3-1	2.52381	0.000110277
miRNA	hsa-mir-4799	3.92857	7.1606e-05	protein_coding	RP11-181E22.3-001	2.52381	0.000110277
miRNA	hsa-mir-3161	3.92857	7.1606e-05	other_TMapped	ENST00000529392.1	2.52381	0.000110277
miRNA	hsa-mir-1323	3.92857	7.1606e-05	other_TMapped	ENST00000476896.5	2.52381	0.000110277
other_TMapped	ENST00000634334.1	3.92857	7.1606e-05	protein_coding	AC137630.2-001	2.52381	0.000110277
other_TMapped	ENST00000594655.5	3.92857	7.1606e-05	protein_coding	XXbac-BPG296P20.7-001	2.5	0.000109237
other_TMapped	ENST00000515217.1	3.92857	7.1606e-05	tRNA	tRNA-Leu-AAG-1-1	2.5	0.000109237
other_TMapped	ENST00000467903.5	3.92857	7.1606e-05	protein_coding	RP5-894A10.3-001	2.5	0.000109237
protein_coding	AC027682.2-005	3.92857	7.1606e-05	protein_coding	RP11-353K22.1-001	2.5	0.000109237
tRNA	tRNA-Thr-CGT-3-1	3.90476	7.1172e-05	protein_coding	RP1-62O9.4-001	2.5	0.000109237
protein_coding	RP4-559A3.1-001	3.90476	7.1172e-05	protein_coding	RP1-161P9.2-019	2.5	0.000109237
other_TMapped	ENST00000384371.1	3.90476	7.1172e-05	protein_coding	MT-ND6-201	2.5	0.000109237
other_TMapped	ENST00000364916.1	3.90476	7.1172e-05	protein_coding	HSPA14-204	2.5	0.000109237
other_TMapped	ENST00000364853.2	3.90476	7.1172e-05	miRNA	hsa-mir-2278	2.5	0.000109237
other_TMapped	ENST00000363959.1	3.90476	7.1172e-05	miRNA	hsa-mir-219b	2.5	0.000109237
protein_coding	AC093249.5-001	3.90476	7.1172e-05	other_TMapped	ENST00000623854.1	2.5	0.000109237
protein_coding	RP11-255A11.5-002	3.88095	7.07381e-05	other_TMapped	ENST00000610254.1	2.5	0.000109237
miRNA	hsa-mir-6736	3.88095	7.07381e-05	other_TMapped	ENST00000364874.1	2.5	0.000109237
protein_coding	GOLGA8N-201	3.88095	7.07381e-05	protein_coding	AC069523.15-003	2.5	0.000109237
other_TMapped	ENST00000465794.1	3.88095	7.07381e-05	protein_coding	AC005071.12-003	2.5	0.000109237
protein_coding	CPEB2-209	3.88095	7.07381e-05	tRNA	tRNA-Arg-TCG-3-1	2.47619	0.000108196
protein_coding	AC019011.1-002	3.88095	7.07381e-05	protein_coding	RP3-524E15.1-001	2.47619	0.000108196
protein_coding	LILRB1-201	3.85714	7.03041e-05	protein_coding	RP11-700F16.4-012	2.47619	0.000108196
miRNA	hsa-mir-548ac	3.85714	7.03041e-05	protein_coding	RP1-193B12.8-001	2.47619	0.000108196
other_TMapped	ENST00000517285.1	3.85714	7.03041e-05	miRNA	hsa-mir-1227	2.47619	0.000108196
protein_coding	AC104802.2-003	3.85714	7.03041e-05	piRNA	hsa_piR_005018|gb|DQ576917|Homo_sapiens	2.47619	0.000108196
protein_coding	RP11-735A19.1-002	3.83333	6.98701e-05	other_TMapped	ENST00000564809.1	2.47619	0.000108196
protein_coding	RP11-64K12.2-002	3.83333	6.98701e-05	other_TMapped	ENST00000476966.5	2.47619	0.000108196
miRNA	hsa-mir-4748	3.83333	6.98701e-05	other_TMapped	ENST00000364923.1	2.47619	0.000108196
other_TMapped	ENST00000641232.1	3.83333	6.98701e-05	protein_coding	CTD-2527I21.13-007	2.47619	0.000108196
other_TMapped	ENST00000364854.1	3.83333	6.98701e-05	protein_coding	AC093535.2-033	2.47619	0.000108196
protein_coding	AC113611.1-002	3.83333	6.98701e-05	protein_coding	RP5-1056L3.4-005	2.45238	0.000107156
protein_coding	RP11-500M8.3-001	3.80952	6.94361e-05	protein_coding	RP11-49I4.1-001	2.45238	0.000107156
protein_coding	RP11-261P4.6-001	3.80952	6.94361e-05	protein_coding	RP11-156G14.2-001	2.45238	0.000107156
protein_coding	RP11-1191J2.1-003	3.80952	6.94361e-05	protein_coding	LA16c-398G5.1-005	2.45238	0.000107156
protein_coding	RP1-193H18.1-001	3.80952	6.94361e-05	miRNA	hsa-mir-378b	2.45238	0.000107156
other_TMapped	ENST00000528276.1	3.80952	6.94361e-05	other_TMapped	ENST00000612499.1	2.45238	0.000107156
protein_coding	CTB-59C6.1-001	3.80952	6.94361e-05	other_TMapped	ENST00000535402.1	2.45238	0.000107156
protein_coding	AP006309.3-006	3.80952	6.94361e-05	other_TMapped	ENST00000468868.1	2.45238	0.000107156
protein_coding	RP5-1051J4.2-001	3.78571	6.90022e-05	protein_coding	AC098476.1-002	2.45238	0.000107156
miRNA	hsa-mir-2276	3.78571	6.90022e-05	protein_coding	RP5-1181K21.3-001	2.42857	0.000106116
other_TMapped	ENST00000624468.1	3.78571	6.90022e-05	protein_coding	RP3-434O14.6-001	2.42857	0.000106116
other_TMapped	ENST00000558345.5	3.78571	6.90022e-05	protein_coding	RP11-646I6.2-012	2.42857	0.000106116
protein_coding	RP5-1009E24.2-001	3.7619	6.85682e-05	miRNA	hsa-mir-3192	2.42857	0.000106116
protein_coding	RP11-811I7.1-001	3.7619	6.85682e-05	other_TMapped	ENST00000608886.1	2.42857	0.000106116
protein_coding	RP11-749I16.2-003	3.7619	6.85682e-05	other_TMapped	ENST00000530819.1	2.42857	0.000106116
protein_coding	RP1-267L14.5-001	3.7619	6.85682e-05	other_TMapped	ENST00000483385.1	2.42857	0.000106116
miRNA	hsa-mir-6783	3.7619	6.85682e-05	protein_coding	AL133453.4-001	2.42857	0.000106116
other_TMapped	ENST00000529209.1	3.7619	6.85682e-05	protein_coding	AC135048.8-003	2.42857	0.000106116
protein_coding	AL121656.1-001	3.7619	6.85682e-05	protein_coding	AC104759.2-001	2.42857	0.000106116
tRNA	tRNA-Lys-CTT-5-1	3.7381	6.81342e-05	protein_coding	AC006077.1-001	2.42857	0.000106116
protein_coding	RP11-52A20.1-005	3.7381	6.81342e-05	protein_coding	AC005796.3-005	2.42857	0.000106116
protein_coding	RP11-510J16.2-001	3.7381	6.81342e-05	protein_coding	AC005796.3-001	2.42857	0.000106116
protein_coding	RP11-466F5.2-001	3.7381	6.81342e-05	tRNA	tRNA-Arg-TCG-5-1	2.40476	0.000105075
other_TMapped	ENST00000364874.1	3.7381	6.81342e-05	protein_coding	GS1-393G12.5-012	2.40476	0.000105075
protein_coding	CTD-2216L1.1-002	3.7381	6.81342e-05	other_TMapped	ENST00000532353.1	2.40476	0.000105075
protein_coding	AC008074.2-003	3.7381	6.81342e-05	other_TMapped	ENST00000517280.1	2.40476	0.000105075
protein_coding	RP11-350M7.1-004	3.71429	6.77002e-05	other_TMapped	ENST00000415675.3	2.40476	0.000105075
protein_coding	OR7A17-201	3.71429	6.77002e-05	other_TMapped	ENST00000410669.1	2.40476	0.000105075
miRNA	hsa-mir-3180-2	3.71429	6.77002e-05	other_TMapped	ENST00000384072.1	2.40476	0.000105075
other_TMapped	ENST00000626073.1	3.71429	6.77002e-05	protein_coding	AF121781.16-009	2.40476	0.000105075
other_TMapped	ENST00000579401.1	3.71429	6.77002e-05	protein_coding	AC018809.5-001	2.40476	0.000105075
other_TMapped	ENST00000458981.1	3.71429	6.77002e-05	tRNA	tRNA-Leu-CAG-1-7	2.38095	0.000104035
other_TMapped	ENST00000364533.1	3.71429	6.77002e-05	protein_coding	RP11-805J14.1-007	2.38095	0.000104035
protein_coding	CTB-174O21.1-021	3.71429	6.77002e-05	protein_coding	RP11-66D17.10-002	2.38095	0.000104035
tRNA	tRNA-Glu-TTC-1-1	3.69048	6.72663e-05	protein_coding	RP11-629N8.1-005	2.38095	0.000104035
protein_coding	RP1-121G13.4-001	3.69048	6.72663e-05	protein_coding	RP11-178G16.3-002	2.38095	0.000104035
protein_coding	LY6G6E-225	3.69048	6.72663e-05	miRNA	hsa-mir-6809	2.38095	0.000104035
protein_coding	AC024910.1-032	3.69048	6.72663e-05	miRNA	hsa-mir-4714	2.38095	0.000104035
protein_coding	AC019140.1-002	3.69048	6.72663e-05	protein_coding	GS1-393G12.7-001	2.38095	0.000104035
protein_coding	RP4-543J19.6-035	3.66667	6.68323e-05	other_TMapped	ENST00000623921.1	2.38095	0.000104035
miRNA	hsa-mir-2278	3.66667	6.68323e-05	other_TMapped	ENST00000501695.3	2.38095	0.000104035
piRNA	hsa_piR_001101|gb|DQ571419|Homo_sapiens	3.66667	6.68323e-05	other_TMapped	ENST00000487169.5	2.38095	0.000104035
other_TMapped	ENST00000435306.1	3.66667	6.68323e-05	other_TMapped	ENST00000449168.1	2.38095	0.000104035
other_TMapped	ENST00000416316.1	3.66667	6.68323e-05	protein_coding	AC104850.1-002	2.38095	0.000104035
protein_coding	CTD-3065J16.3-003	3.66667	6.68323e-05	protein_coding	RP11-526I8.1-001	2.35714	0.000102994
protein_coding	AC005933.2-003	3.66667	6.68323e-05	protein_coding	RP11-156E22.1-007	2.35714	0.000102994
miRNA	hsa-mir-1-1	3.64286	6.63983e-05	miRNA	hsa-mir-676	2.35714	0.000102994
other_TMapped	ENST00000520134.1	3.64286	6.63983e-05	other_TMapped	ENST00000630757.1	2.35714	0.000102994
other_TMapped	ENST00000477275.1	3.64286	6.63983e-05	other_TMapped	ENST00000628622.1	2.35714	0.000102994
protein_coding	AC116914.1-001	3.64286	6.63983e-05	other_TMapped	ENST00000625783.2	2.35714	0.000102994
protein_coding	XXbac-BPG254B15.4-001	3.61905	6.59643e-05	other_TMapped	ENST00000557424.1	2.35714	0.000102994
tRNA	tRNA-Ile-GAT-1-3	3.61905	6.59643e-05	other_TMapped	ENST00000553027.1	2.35714	0.000102994
protein_coding	RP4-790G17.5-005	3.61905	6.59643e-05	other_TMapped	ENST00000454521.1	2.35714	0.000102994
protein_coding	RP4-621F18.1-001	3.61905	6.59643e-05	other_TMapped	ENST00000424643.3	2.35714	0.000102994
protein_coding	RP4-534D1.4-001	3.61905	6.59643e-05	other_TMapped	ENST00000390963.1	2.35714	0.000102994
protein_coding	RP11-685I11.4-002	3.61905	6.59643e-05	other_TMapped	ENST00000365157.1	2.35714	0.000102994
YRNA	RNY3P13-201	3.61905	6.59643e-05	protein_coding	AC004142.2-002	2.35714	0.000102994
miRNA	hsa-mir-7151	3.61905	6.59643e-05	protein_coding	RP11-837J7.2-008	2.33333	0.000101954
miRNA	hsa-mir-643	3.61905	6.59643e-05	protein_coding	RP11-346L1.1-001	2.33333	0.000101954
other_TMapped	ENST00000429033.1	3.61905	6.59643e-05	protein_coding	RP11-296K13.2-001	2.33333	0.000101954
other_TMapped	ENST00000416553.1	3.61905	6.59643e-05	protein_coding	RP11-21B21.2-001	2.33333	0.000101954
protein_coding	AC006042.4-001	3.61905	6.59643e-05	protein_coding	PTCH2-203	2.33333	0.000101954
piRNA	hsa_piR_020450|gb|DQ598104|Homo_sapiens	3.59524	6.55304e-05	miRNA	hsa-mir-6779	2.33333	0.000101954
other_TMapped	ENST00000475015.5	3.59524	6.55304e-05	miRNA	hsa-mir-6751	2.33333	0.000101954
protein_coding	AC016656.2-009	3.59524	6.55304e-05	other_TMapped	ENST00000525716.2	2.33333	0.000101954
protein_coding	SMAD4-201	3.57143	6.50964e-05	other_TMapped	ENST00000498313.5	2.33333	0.000101954
protein_coding	RP3-524E15.1-001	3.57143	6.50964e-05	other_TMapped	ENST00000364009.1	2.33333	0.000101954
miRNA	hsa-mir-7848	3.57143	6.50964e-05	protein_coding	CTD-3116E22.5-001	2.33333	0.000101954
miRNA	hsa-mir-1256	3.57143	6.50964e-05	protein_coding	AP000348.4-001	2.33333	0.000101954
other_TMapped	ENST00000564205.1	3.57143	6.50964e-05	protein_coding	AC018643.3-001	2.33333	0.000101954
other_TMapped	ENST00000516851.1	3.57143	6.50964e-05	protein_coding	AC015684.1-005	2.33333	0.000101954
other_TMapped	ENST00000471989.5	3.57143	6.50964e-05	protein_coding	RP11-391H5.2-001	2.30952	0.000100914
other_TMapped	ENST00000465464.5	3.57143	6.50964e-05	protein_coding	MT-ND1-201	2.30952	0.000100914
protein_coding	CTC-523E23.7-003	3.57143	6.50964e-05	miRNA	hsa-mir-6862-2	2.30952	0.000100914
protein_coding	RP11-19J3.3-003	3.54762	6.46624e-05	other_TMapped	ENST00000644426.1	2.30952	0.000100914
protein_coding	PCGF3-213	3.54762	6.46624e-05	other_TMapped	ENST00000627545.2	2.30952	0.000100914
protein_coding	NSD1-202	3.54762	6.46624e-05	other_TMapped	ENST00000584239.2	2.30952	0.000100914
protein_coding	HSPA14-204	3.54762	6.46624e-05	other_TMapped	ENST00000561356.1	2.30952	0.000100914
miRNA	hsa-mir-3675	3.54762	6.46624e-05	other_TMapped	ENST00000475904.1	2.30952	0.000100914
other_TMapped	ENST00000592937.1	3.54762	6.46624e-05	other_TMapped	ENST00000459674.5	2.30952	0.000100914
other_TMapped	ENST00000504678.1	3.54762	6.46624e-05	other_TMapped	ENST00000416009.2	2.30952	0.000100914
other_TMapped	ENST00000455567.1	3.54762	6.46624e-05	other_TMapped	ENST00000391017.1	2.30952	0.000100914
other_TMapped	ENST00000365529.1	3.54762	6.46624e-05	protein_coding	AP001360.1-011	2.30952	0.000100914
protein_coding	AC136431.1-001	3.54762	6.46624e-05	protein_coding	AC133528.3-001	2.30952	0.000100914
protein_coding	AC004142.2-002	3.54762	6.46624e-05	protein_coding	AC019254.1-001	2.30952	0.000100914
protein_coding	RP11-394G8.1-001	3.52381	6.42284e-05	protein_coding	AC011461.6-003	2.30952	0.000100914
protein_coding	RP11-165P7.2-012	3.52381	6.42284e-05	protein_coding	AC007093.1-001	2.30952	0.000100914
YRNA	RNY1P14-201	3.52381	6.42284e-05	protein_coding	RP11-99I12.1-005	2.28571	9.98734e-05
miRNA	hsa-mir-6787	3.52381	6.42284e-05	other_TMapped	ENST00000489038.5	2.28571	9.98734e-05
miRNA	hsa-mir-329-2	3.52381	6.42284e-05	other_TMapped	ENST00000465317.3	2.28571	9.98734e-05
miRNA	hsa-mir-320d-2	3.52381	6.42284e-05	protein_coding	AC007787.4-001	2.28571	9.98734e-05
other_TMapped	ENST00000623543.1	3.52381	6.42284e-05	tRNA	tRNA-Lys-CTT-5-1	2.2619	9.88331e-05
other_TMapped	ENST00000591616.1	3.52381	6.42284e-05	protein_coding	ST6GALNAC6-215	2.2619	9.88331e-05
other_TMapped	ENST00000578067.5	3.52381	6.42284e-05	protein_coding	RP11-715N9.1-001	2.2619	9.88331e-05
other_TMapped	ENST00000441524.1	3.52381	6.42284e-05	protein_coding	RP11-480K16.2-002	2.2619	9.88331e-05
other_TMapped	ENST00000364326.1	3.52381	6.42284e-05	protein_coding	RP11-193E15.3-003	2.2619	9.88331e-05
protein_coding	AC009307.2-015	3.52381	6.42284e-05	protein_coding	MLLT10-202	2.2619	9.88331e-05
protein_coding	AC007277.1-005	3.52381	6.42284e-05	miRNA	hsa-mir-607	2.2619	9.88331e-05
protein_coding	RP11-506G7.6-004	3.5	6.37945e-05	miRNA	hsa-mir-548a-3	2.2619	9.88331e-05
protein_coding	RP11-477H21.1-017	3.5	6.37945e-05	miRNA	hsa-mir-4660	2.2619	9.88331e-05
protein_coding	RP11-280I23.2-001	3.5	6.37945e-05	miRNA	hsa-mir-3688-2	2.2619	9.88331e-05
other_TMapped	ENST00000639461.1	3.5	6.37945e-05	piRNA	hsa_piR_012753|gb|DQ587269|Homo_sapiens	2.2619	9.88331e-05
other_TMapped	ENST00000561402.5	3.5	6.37945e-05	other_TMapped	ENST00000464213.1	2.2619	9.88331e-05
other_TMapped	ENST00000553596.2	3.5	6.37945e-05	protein_coding	EIF4G2-232	2.2619	9.88331e-05
other_TMapped	ENST00000458902.1	3.5	6.37945e-05	protein_coding	CTC-458I2.1-001	2.2619	9.88331e-05
protein_coding	DAZ1-206	3.5	6.37945e-05	protein_coding	AP001443.4-005	2.2619	9.88331e-05
protein_coding	AL355075.3-003	3.5	6.37945e-05	protein_coding	AC009078.5-001	2.2619	9.88331e-05
protein_coding	AC037198.2-001	3.5	6.37945e-05	protein_coding	SRC-201	2.2381	9.77927e-05
protein_coding	AC004943.2-002	3.5	6.37945e-05	protein_coding	RP11-69D4.1-001	2.2381	9.77927e-05
protein_coding	TRIM66-201	3.47619	6.33605e-05	protein_coding	RP11-510N19.1-002	2.2381	9.77927e-05
protein_coding	RP11-863H1.2-002	3.47619	6.33605e-05	miRNA	hsa-mir-6884	2.2381	9.77927e-05
protein_coding	RP11-691N7.5-007	3.47619	6.33605e-05	other_TMapped	ENST00000553639.1	2.2381	9.77927e-05
protein_coding	PTCRA-204	3.47619	6.33605e-05	other_TMapped	ENST00000465324.1	2.2381	9.77927e-05
other_TMapped	ENST00000565396.5	3.47619	6.33605e-05	other_TMapped	ENST00000443504.1	2.2381	9.77927e-05
other_TMapped	ENST00000485298.3	3.47619	6.33605e-05	protein_coding	CTB-79E8.1-003	2.2381	9.77927e-05
other_TMapped	ENST00000383855.1	3.47619	6.33605e-05	protein_coding	CTA-437B22.1-002	2.2381	9.77927e-05
other_TMapped	ENST00000363046.1	3.47619	6.33605e-05	protein_coding	CSMD2-210	2.2381	9.77927e-05
protein_coding	AC037199.1-016	3.47619	6.33605e-05	protein_coding	AC010480.1-003	2.2381	9.77927e-05
protein_coding	AC012360.5-006	3.47619	6.33605e-05	protein_coding	AC005933.2-001	2.2381	9.77927e-05
protein_coding	AC008870.10-001	3.47619	6.33605e-05	protein_coding	U52111.9-003	2.21429	9.67524e-05
tRNA	tRNA-Ala-AGC-4-1	3.45238	6.29265e-05	tRNA	tRNA-Thr-CGT-3-1	2.21429	9.67524e-05
protein_coding	RP5-894A10.3-001	3.45238	6.29265e-05	tRNA	tRNA-Gly-CCC-3-1	2.21429	9.67524e-05
protein_coding	RP11-792G9.2-001	3.45238	6.29265e-05	protein_coding	RP5-1163L11.1-003	2.21429	9.67524e-05
protein_coding	RP11-679B17.1-001	3.45238	6.29265e-05	protein_coding	RP4-671G15.1-001	2.21429	9.67524e-05
protein_coding	RP11-666A1.6-002	3.45238	6.29265e-05	protein_coding	RP11-297O4.1-001	2.21429	9.67524e-05
other_TMapped	ENST00000568314.1	3.45238	6.29265e-05	protein_coding	RP11-168K11.4-008	2.21429	9.67524e-05
other_TMapped	ENST00000478402.5	3.45238	6.29265e-05	protein_coding	RP1-160A22.4-001	2.21429	9.67524e-05
protein_coding	CTD-2659N19.7-001	3.45238	6.29265e-05	protein_coding	L29074.2-004	2.21429	9.67524e-05
protein_coding	RP3-467L1.1-001	3.42857	6.24925e-05	miRNA	hsa-mir-548b	2.21429	9.67524e-05
other_TMapped	ENST00000465215.1	3.42857	6.24925e-05	miRNA	hsa-mir-3150a	2.21429	9.67524e-05
other_TMapped	ENST00000464165.1	3.42857	6.24925e-05	other_TMapped	ENST00000610032.1	2.21429	9.67524e-05
protein_coding	AC105391.3-004	3.42857	6.24925e-05	other_TMapped	ENST00000541303.5	2.21429	9.67524e-05
protein_coding	AC009961.1-005	3.42857	6.24925e-05	other_TMapped	ENST00000526857.2	2.21429	9.67524e-05
protein_coding	AC006023.6-004	3.42857	6.24925e-05	other_TMapped	ENST00000384377.1	2.21429	9.67524e-05
protein_coding	RP11-766F14.2-001	3.40476	6.20586e-05	protein_coding	AC124916.11-007	2.21429	9.67524e-05
protein_coding	RP11-63P12.8-001	3.40476	6.20586e-05	protein_coding	AC018890.3-001	2.21429	9.67524e-05
protein_coding	RP11-521B24.6-002	3.40476	6.20586e-05	protein_coding	AC012443.2-001	2.21429	9.67524e-05
protein_coding	RP11-493P1.1-001	3.40476	6.20586e-05	tRNA	tRNA-Leu-AAG-2-4	2.19048	9.5712e-05
protein_coding	RP11-21L23.1-004	3.40476	6.20586e-05	protein_coding	RP11-493G17.5-015	2.19048	9.5712e-05
other_TMapped	ENST00000520036.1	3.40476	6.20586e-05	protein_coding	RP11-483E23.8-001	2.19048	9.5712e-05
other_TMapped	ENST00000517148.1	3.40476	6.20586e-05	protein_coding	RP11-124D2.4-004	2.19048	9.5712e-05
other_TMapped	ENST00000384198.1	3.40476	6.20586e-05	protein_coding	MOB3C-202	2.19048	9.5712e-05
protein_coding	CTD-2517O10.2-022	3.40476	6.20586e-05	miRNA	hsa-mir-4728	2.19048	9.5712e-05
protein_coding	XX-FW83563B9.2-005	3.38095	6.16246e-05	other_TMapped	ENST00000554200.1	2.19048	9.5712e-05
tRNA	tRNA-Cys-GCA-17-1	3.38095	6.16246e-05	other_TMapped	ENST00000550483.5	2.19048	9.5712e-05
protein_coding	RP5-940J5.7-024	3.38095	6.16246e-05	other_TMapped	ENST00000384138.1	2.19048	9.5712e-05
protein_coding	RP11-254O21.1-001	3.38095	6.16246e-05	protein_coding	CTD-2314I6.2-003	2.19048	9.5712e-05
protein_coding	RP11-245J9.9-003	3.38095	6.16246e-05	protein_coding	AC000093.4-004	2.19048	9.5712e-05
protein_coding	RP1-130E4.2-009	3.38095	6.16246e-05	protein_coding	RP5-943F2.2-001	2.16667	9.46717e-05
piRNA	hsa_piR_004801|gb|DQ576605|Homo_sapiens	3.38095	6.16246e-05	protein_coding	RP5-1003J2.1-008	2.16667	9.46717e-05
other_TMapped	ENST00000515982.1	3.38095	6.16246e-05	protein_coding	RP11-290P14.1-001	2.16667	9.46717e-05
protein_coding	AC135056.2-002	3.38095	6.16246e-05	protein_coding	RP11-122K13.1-001	2.16667	9.46717e-05
protein_coding	AC091984.2-001	3.38095	6.16246e-05	miRNA	hsa-mir-6886	2.16667	9.46717e-05
protein_coding	AC008151.1-001	3.38095	6.16246e-05	miRNA	hsa-mir-3675	2.16667	9.46717e-05
protein_coding	RP11-901L6.2-001	3.35714	6.11906e-05	other_TMapped	ENST00000609127.1	2.16667	9.46717e-05
protein_coding	RP11-439E19.2-001	3.35714	6.11906e-05	other_TMapped	ENST00000566331.1	2.16667	9.46717e-05
protein_coding	RP11-277J24.3-001	3.35714	6.11906e-05	other_TMapped	ENST00000553951.1	2.16667	9.46717e-05
protein_coding	RP1-172B20.4-002	3.35714	6.11906e-05	other_TMapped	ENST00000487297.5	2.16667	9.46717e-05
miRNA	hsa-mir-3154	3.35714	6.11906e-05	protein_coding	CTA-256D12.10-008	2.16667	9.46717e-05
other_TMapped	ENST00000645956.1	3.35714	6.11906e-05	protein_coding	AC037198.2-001	2.16667	9.46717e-05
other_TMapped	ENST00000607089.1	3.35714	6.11906e-05	protein_coding	AC005663.3-002	2.16667	9.46717e-05
other_TMapped	ENST00000572877.1	3.35714	6.11906e-05	protein_coding	XXbac-BPG118E17.1-001	2.14286	9.36313e-05
protein_coding	AC092545.2-002	3.35714	6.11906e-05	protein_coding	RP5-820A21.1-002	2.14286	9.36313e-05
protein_coding	RP1-197L1.2-001	3.33333	6.07566e-05	protein_coding	RP4-786G8.2-001	2.14286	9.36313e-05
miRNA	hsa-mir-1225	3.33333	6.07566e-05	protein_coding	RP11-80A15.5-009	2.14286	9.36313e-05
other_TMapped	ENST00000417358.1	3.33333	6.07566e-05	protein_coding	RP11-481K16.1-001	2.14286	9.36313e-05
protein_coding	S100A13-203	3.30952	6.03227e-05	protein_coding	RP11-1143G9.3-004	2.14286	9.36313e-05
protein_coding	RP11-92K15.2-012	3.30952	6.03227e-05	protein_coding	MT-ATP6-201	2.14286	9.36313e-05
protein_coding	RP11-770G2.9-018	3.30952	6.03227e-05	other_TMapped	ENST00000623195.1	2.14286	9.36313e-05
protein_coding	RP11-438H8.4-001	3.30952	6.03227e-05	other_TMapped	ENST00000477202.1	2.14286	9.36313e-05
protein_coding	RP11-126L15.7-003	3.30952	6.03227e-05	protein_coding	AC009003.1-012	2.14286	9.36313e-05
protein_coding	GRN-222	3.30952	6.03227e-05	protein_coding	RP11-599B13.4-002	2.11905	9.2591e-05
other_TMapped	ENST00000510832.5	3.30952	6.03227e-05	protein_coding	RP11-571M6.14-001	2.11905	9.2591e-05
other_TMapped	ENST00000500009.2	3.30952	6.03227e-05	protein_coding	RP11-369L17.2-003	2.11905	9.2591e-05
protein_coding	CTD-3014M21.2-002	3.30952	6.03227e-05	miRNA	hsa-mir-641	2.11905	9.2591e-05
protein_coding	AP000487.2-002	3.30952	6.03227e-05	miRNA	hsa-mir-605	2.11905	9.2591e-05
protein_coding	AC113133.2-002	3.30952	6.03227e-05	other_TMapped	hsa_circ_001671	2.11905	9.2591e-05
protein_coding	RP4-761J14.6-006	3.28571	5.98887e-05	other_TMapped	ENST00000636554.1	2.11905	9.2591e-05
protein_coding	RP1-85F18.3-001	3.28571	5.98887e-05	other_TMapped	ENST00000581956.1	2.11905	9.2591e-05
miRNA	hsa-mir-610	3.28571	5.98887e-05	other_TMapped	ENST00000521841.1	2.11905	9.2591e-05
protein_coding	FOXP4-203	3.28571	5.98887e-05	other_TMapped	ENST00000490729.1	2.11905	9.2591e-05
other_TMapped	ENST00000644221.1	3.28571	5.98887e-05	other_TMapped	ENST00000456614.2	2.11905	9.2591e-05
other_TMapped	ENST00000462488.1	3.28571	5.98887e-05	other_TMapped	ENST00000387429.1	2.11905	9.2591e-05
protein_coding	AC009464.1-002	3.28571	5.98887e-05	protein_coding	AP001094.2-001	2.11905	9.2591e-05
protein_coding	RP11-677M14.1-002	3.2619	5.94547e-05	protein_coding	AC005606.17-004	2.11905	9.2591e-05
protein_coding	RP11-45B20.2-001	3.2619	5.94547e-05	protein_coding	RP13-1056D16.4-001	2.09524	9.15506e-05
protein_coding	RP11-269F19.8-002	3.2619	5.94547e-05	protein_coding	RP11-47A8.4-001	2.09524	9.15506e-05
protein_coding	RP1-228H13.3-001	3.2619	5.94547e-05	protein_coding	RP11-103J18.2-001	2.09524	9.15506e-05
protein_coding	RP1-109M1.1-001	3.2619	5.94547e-05	protein_coding	MT-CO3-201	2.09524	9.15506e-05
miRNA	hsa-mir-6805	3.2619	5.94547e-05	protein_coding	IL6R-208	2.09524	9.15506e-05
other_TMapped	ENST00000624224.1	3.2619	5.94547e-05	miRNA	hsa-mir-4734	2.09524	9.15506e-05
other_TMapped	ENST00000607520.1	3.2619	5.94547e-05	other_TMapped	ENST00000575511.1	2.09524	9.15506e-05
other_TMapped	ENST00000466982.1	3.2619	5.94547e-05	other_TMapped	ENST00000484693.1	2.09524	9.15506e-05
other_TMapped	ENST00000434943.1	3.2619	5.94547e-05	other_TMapped	ENST00000457707.1	2.09524	9.15506e-05
protein_coding	AC087579.1-005	3.2619	5.94547e-05	other_TMapped	ENST00000391203.1	2.09524	9.15506e-05
protein_coding	AC005726.13-002	3.2619	5.94547e-05	protein_coding	CTD-2231E14.1-001	2.09524	9.15506e-05
tRNA	tRNA-Val-CAC-1-1	3.2381	5.90207e-05	protein_coding	CTB-54O9.8-015	2.09524	9.15506e-05
protein_coding	RP5-1112D6.6-001	3.2381	5.90207e-05	protein_coding	AC105391.3-001	2.09524	9.15506e-05
protein_coding	RP11-98D18.8-009	3.2381	5.90207e-05	protein_coding	AC104802.2-003	2.09524	9.15506e-05
protein_coding	RP11-112J3.20-001	3.2381	5.90207e-05	protein_coding	AC026803.13-001	2.09524	9.15506e-05
miRNA	hsa-mir-6881	3.2381	5.90207e-05	protein_coding	RP11-46A10.1-001	2.07143	9.05103e-05
other_TMapped	ENST00000533685.1	3.2381	5.90207e-05	protein_coding	RP1-93H18.2-014	2.07143	9.05103e-05
other_TMapped	ENST00000408376.1	3.2381	5.90207e-05	protein_coding	LL0XNC01-16G2.2-001	2.07143	9.05103e-05
protein_coding	AL627171.4-001	3.2381	5.90207e-05	miRNA	hsa-mir-4775	2.07143	9.05103e-05
protein_coding	RP5-858B16.1-026	3.21429	5.85867e-05	protein_coding	CTA-109D1.2-003	2.07143	9.05103e-05
miRNA	hsa-mir-6732	3.21429	5.85867e-05	protein_coding	AC005922.2-003	2.07143	9.05103e-05
protein_coding	RP4-747L4.1-001	3.19048	5.81528e-05	protein_coding	RP4-620E11.6-001	2.04762	8.94699e-05
protein_coding	RP11-968A15.4-001	3.19048	5.81528e-05	protein_coding	RP11-661O13.3-001	2.04762	8.94699e-05
miRNA	hsa-mir-6813	3.19048	5.81528e-05	protein_coding	RP11-474I11.4-002	2.04762	8.94699e-05
other_TMapped	ENST00000563403.1	3.19048	5.81528e-05	protein_coding	RP11-190J1.8-001	2.04762	8.94699e-05
protein_coding	AC023421.2-003	3.19048	5.81528e-05	protein_coding	RP11-157L14.3-005	2.04762	8.94699e-05
protein_coding	RP13-225O21.1-001	3.16667	5.77188e-05	protein_coding	RP1-59D14.2-001	2.04762	8.94699e-05
protein_coding	RP11-32L2.1-001	3.16667	5.77188e-05	miRNA	hsa-mir-6754	2.04762	8.94699e-05
miRNA	hsa-mir-3677	3.16667	5.77188e-05	miRNA	hsa-mir-5698	2.04762	8.94699e-05
miRNA	hsa-mir-3648-2	3.16667	5.77188e-05	miRNA	hsa-mir-548ay	2.04762	8.94699e-05
other_TMapped	ENST00000638002.1	3.16667	5.77188e-05	piRNA	hsa_piR_009051|gb|DQ582264|Homo_sapiens	2.04762	8.94699e-05
other_TMapped	ENST00000609858.1	3.16667	5.77188e-05	other_TMapped	ENST00000440735.2	2.04762	8.94699e-05
protein_coding	AC136940.8-001	3.16667	5.77188e-05	other_TMapped	ENST00000422631.1	2.04762	8.94699e-05
protein_coding	AC007535.2-001	3.16667	5.77188e-05	protein_coding	AC113189.4-002	2.04762	8.94699e-05
protein_coding	RP11-747H7.2-003	3.14286	5.72848e-05	protein_coding	AC098850.2-006	2.04762	8.94699e-05
protein_coding	RP11-420F12.1-003	3.14286	5.72848e-05	protein_coding	XXbac-BPG296P20.2-002	2.02381	8.84296e-05
protein_coding	RP1-160A22.4-001	3.14286	5.72848e-05	protein_coding	RP5-890O3.5-004	2.02381	8.84296e-05
miRNA	hsa-mir-4436b-2	3.14286	5.72848e-05	protein_coding	RP3-325F22.4-001	2.02381	8.84296e-05
piRNA	hsa_piR_017295|gb|DQ593909|Homo_sapiens	3.14286	5.72848e-05	protein_coding	RP11-469H8.5-002	2.02381	8.84296e-05
other_TMapped	ENST00000610128.2	3.14286	5.72848e-05	protein_coding	RP11-383J24.3-001	2.02381	8.84296e-05
other_TMapped	ENST00000582192.1	3.14286	5.72848e-05	protein_coding	RP11-240G22.2-001	2.02381	8.84296e-05
other_TMapped	ENST00000547694.2	3.14286	5.72848e-05	protein_coding	RP1-309I22.1-001	2.02381	8.84296e-05
other_TMapped	ENST00000497563.5	3.14286	5.72848e-05	miRNA	hsa-mir-365b	2.02381	8.84296e-05
protein_coding	CTC-398G3.7-001	3.14286	5.72848e-05	miRNA	hsa-mir-2116	2.02381	8.84296e-05
protein_coding	AC124916.11-007	3.14286	5.72848e-05	other_TMapped	ENST00000547694.2	2.02381	8.84296e-05
protein_coding	RP4-697K14.7-003	3.11905	5.68508e-05	other_TMapped	ENST00000516914.2	2.02381	8.84296e-05
protein_coding	RP11-301N24.1-005	3.11905	5.68508e-05	other_TMapped	ENST00000491455.5	2.02381	8.84296e-05
miRNA	hsa-mir-6786	3.11905	5.68508e-05	other_TMapped	ENST00000464112.5	2.02381	8.84296e-05
other_TMapped	ENST00000637374.1	3.11905	5.68508e-05	protein_coding	CRYZ-205	2.02381	8.84296e-05
other_TMapped	ENST00000593445.5	3.11905	5.68508e-05	protein_coding	AC097473.1-008	2.02381	8.84296e-05
protein_coding	CTD-2024I7.11-001	3.11905	5.68508e-05	protein_coding	AC007766.3-001	2.02381	8.84296e-05
protein_coding	AC005177.1-001	3.11905	5.68508e-05	tRNA	tRNA-Thr-AGT-5-1	2	8.73893e-05
protein_coding	XXbac-BPG249D20.1-001	3.09524	5.64169e-05	tRNA	tRNA-Phe-GAA-4-1	2	8.73893e-05
tRNA	tRNA-Gln-TTG-2-1	3.09524	5.64169e-05	protein_coding	RP3-473J16.4-006	2	8.73893e-05
protein_coding	RP11-420A6.1-001	3.09524	5.64169e-05	protein_coding	RP3-424M6.5-001	2	8.73893e-05
miRNA	hsa-mir-6754	3.09524	5.64169e-05	protein_coding	RP11-478C1.5-006	2	8.73893e-05
miRNA	hsa-mir-6731	3.09524	5.64169e-05	miRNA	hsa-mir-4762	2	8.73893e-05
miRNA	hsa-mir-378g	3.09524	5.64169e-05	miRNA	hsa-mir-4449	2	8.73893e-05
miRNA	hsa-mir-3180-4	3.09524	5.64169e-05	protein_coding	GPR39-203	2	8.73893e-05
other_TMapped	ENST00000619475.1	3.09524	5.64169e-05	protein_coding	EPB41-201	2	8.73893e-05
other_TMapped	ENST00000615610.1	3.09524	5.64169e-05	other_TMapped	ENST00000625232.2	2	8.73893e-05
other_TMapped	ENST00000586791.5	3.09524	5.64169e-05	other_TMapped	ENST00000603234.1	2	8.73893e-05
other_TMapped	ENST00000429137.1	3.09524	5.64169e-05	other_TMapped	ENST00000531658.1	2	8.73893e-05
other_TMapped	ENST00000364968.1	3.09524	5.64169e-05	protein_coding	CTC-425F1.3-001	2	8.73893e-05
other_TMapped	ENST00000331301.8	3.09524	5.64169e-05	protein_coding	AP000313.6-001	2	8.73893e-05
protein_coding	AC015849.10-015	3.09524	5.64169e-05	protein_coding	AC136007.1-001	2	8.73893e-05
protein_coding	AC008443.4-001	3.09524	5.64169e-05	protein_coding	AC018755.12-002	2	8.73893e-05
tRNA	tRNA-Tyr-GTA-8-1	3.07143	5.59829e-05	protein_coding	AC006128.1-002	2	8.73893e-05
protein_coding	RP4-811H24.2-001	3.07143	5.59829e-05	protein_coding	AC006117.1-001	2	8.73893e-05
protein_coding	RP11-546M21.5-008	3.07143	5.59829e-05	protein_coding	AC000093.4-014	2	8.73893e-05
miRNA	hsa-mir-4654	3.07143	5.59829e-05	tRNA	tRNA-Ile-AAT-6-1	1.97619	8.63489e-05
other_TMapped	ENST00000641330.1	3.07143	5.59829e-05	protein_coding	RP11-88G17.4-001	1.97619	8.63489e-05
other_TMapped	ENST00000590120.1	3.07143	5.59829e-05	protein_coding	RP11-87C7.1-016	1.97619	8.63489e-05
other_TMapped	ENST00000534468.1	3.07143	5.59829e-05	protein_coding	RP11-666L21.1-001	1.97619	8.63489e-05
other_TMapped	ENST00000508319.1	3.07143	5.59829e-05	protein_coding	RP11-493P1.1-001	1.97619	8.63489e-05
other_TMapped	ENST00000446889.1	3.07143	5.59829e-05	protein_coding	RP11-235C23.1-006	1.97619	8.63489e-05
protein_coding	AC073464.2-003	3.07143	5.59829e-05	protein_coding	RP11-215B13.1-001	1.97619	8.63489e-05
protein_coding	XXbac-BPG157A10.20-007	3.04762	5.55489e-05	protein_coding	RP11-175J10.3-001	1.97619	8.63489e-05
protein_coding	TARS2-205	3.04762	5.55489e-05	protein_coding	RP11-167N20.1-002	1.97619	8.63489e-05
protein_coding	RP11-526I8.1-001	3.04762	5.55489e-05	protein_coding	RP11-119K7.1-001	1.97619	8.63489e-05
protein_coding	RP11-494O16.2-001	3.04762	5.55489e-05	miRNA	hsa-mir-6737	1.97619	8.63489e-05
[truncated: 20,387 more rows]
