# Supplementary material for: Small RNA Changes in Plasma Have Potential for Early Diagnosis of Alzheimer’s Disease before Symptom Onset
Source: Cells. 2024 Jan 23;13(3):207. doi: 10.3390/cells13030207 (PMC10854972; doi:10.3390/cells13030207)
Supplement: Supplementary file 1 [file cells-13-00207-s001.zip › Supplemental table S4 DEG tables all comparisons.xlsx]

## Sheet: control vs PART at autopsy
	baseMean	log2FoldChange	lfcSE	stat	pvalue	padj
hsa-mir-484_49919	65.6473	-2.14417	0.427564	-5.01486	5.3071e-07	0.00119675
hsa-mir-25_16193	20.9932	1.46388	0.318843	4.59122	4.40669e-06	NA
hsa-mir-361_153985	59.0159	-1.35604	0.301703	-4.49462	6.96929e-06	0.00785788
hsa-mir-532_375881	53.6892	2.48529	0.586144	4.24007	2.23449e-05	0.0167959
hsa-mir-379_228632	36.8569	-3.87956	0.948964	-4.0882	4.34729e-05	0.0245078
hsa-let-7e_311990	14.4264	-2.56505	0.651089	-3.93963	8.16077e-05	NA
hsa-mir-451b_95918	40.9329	3.11796	0.836326	3.72816	0.000192883	0.0869904
hsa-mir-3615_156614	16.7848	2.96531	0.801508	3.69967	0.000215883	NA
hsa-mir-186_39204	207.445	1.62903	0.446389	3.64935	0.000262905	0.0982408
hsa-mir-103b-1_309187	140.202	2.07672	0.578278	3.59122	0.000329131	0.0982408
hsa-mir-486-2_356320	60.3675	2.02262	0.565567	3.57627	0.000348526	0.0982408
hsa-mir-486-2_113120	280.442	2.29441	0.647599	3.54295	0.000395685	0.0990157
hsa-mir-451b_82148	45.0493	2.57244	0.735352	3.49825	0.00046833	0.0990157
hsa-mir-486-2_228667	57.3709	2.50931	0.718998	3.49001	0.000483004	0.0990157
hsa-mir-1306_185594	151.848	-1.19629	0.353892	-3.38038	0.000723867	0.136027
hsa-mir-486-2_387945	36.0354	2.29156	0.685437	3.34321	0.000828163	0.143654
hsa-mir-25_278266	12.1431	1.30417	0.395879	3.29437	0.00098644	NA
hsa-mir-25_132490	37.5039	1.3636	0.41547	3.28207	0.00103049	0.155577
hsa-mir-16-2_293401	49.5926	1.45773	0.44738	3.25837	0.00112055	0.155577
hsa-mir-29c_243024	32.9985	1.92893	0.592859	3.25362	0.00113946	0.155577
hsa-mir-432_198137	50.1121	-2.43434	0.752399	-3.23544	0.00121457	0.155577
hsa-mir-22_52166	69.7946	1.73601	0.537616	3.22909	0.00124186	0.155577
hsa-mir-486-2_367491	14.0413	2.20564	0.684525	3.22215	0.00127232	NA
hsa-mir-451b_328069	31.7787	2.4543	0.764144	3.21183	0.0013189	0.156533
hsa-mir-92a-1_173636	14.201	-2.62451	0.817647	-3.20983	0.00132812	NA
hsa-mir-25_107390	28.1599	1.29499	0.40937	3.16337	0.00155952	NA
hsa-mir-451b_295282	28925.1	2.52716	0.799055	3.16268	0.00156323	0.163887
hsa-let-7b_302847	12.2936	2.02757	0.641853	3.15893	0.00158351	NA
hsa-mir-223_72592	14.5927	-1.55963	0.496802	-3.13934	0.00169329	NA
hsa-mir-425_57677	96.194	1.89622	0.606088	3.12862	0.00175632	0.163887
hsa-mir-25_164373	24487	1.04373	0.334394	3.12126	0.00180082	0.163887
hsa-mir-130b_74380	114.033	0.991169	0.317604	3.12077	0.00180378	0.163887
hsa-mir-576_15162	80.5988	2.42202	0.778345	3.11176	0.00185979	0.163887
hsa-mir-29c_188400	113.517	1.90417	0.612187	3.11044	0.00186809	0.163887
hsa-mir-223_125617	2257.37	-0.702914	0.226232	-3.10706	0.00188961	0.163887
hsa-mir-140_33301	23.4551	1.87326	0.606642	3.08792	0.00201561	NA
hsa-mir-484_82267	231.248	2.21039	0.718711	3.0755	0.00210152	0.175515
hsa-mir-484_136842	2019.34	1.33559	0.438181	3.04804	0.00230342	0.185507
hsa-mir-451b_117475	63.9971	2.76691	0.915002	3.02394	0.00249504	0.189021
hsa-mir-224_1066	155.229	-2.15027	0.715377	-3.00579	0.00264892	0.189021
hsa-mir-194-1_74646	147.713	1.69865	0.565684	3.00283	0.00267484	0.189021
hsa-mir-16-1_32936	262.175	1.43863	0.480861	2.99178	0.00277355	0.189021
ENST00000410794.1_314086	179.521	2.33397	0.78049	2.99039	0.00278624	0.189021
hsa-mir-543_309573	32.5415	-3.00406	1.00734	-2.98218	0.00286203	0.189021
RNY4-201_172354	177.634	-1.0188	0.34347	-2.96619	0.00301512	0.189021
hsa-mir-15b_323026	261.288	2.71661	0.915937	2.96594	0.00301763	0.189021
hsa-mir-486-2_156609	167.848	1.97257	0.668369	2.95132	0.00316421	0.189261
RNY4P10-201_336474	1637.9	-3.99583	1.35682	-2.94499	0.00322964	0.189261
hsa-mir-22_249460	137.673	1.9497	0.662974	2.94084	0.00327325	0.189261
hsa-mir-486-2_295307	36.9575	2.30383	0.789218	2.91913	0.00351005	0.197879
hsa-mir-16-2_201841	84.4366	1.21911	0.418901	2.91027	0.00361118	0.198615
hsa-mir-451b_373012	178.909	2.44018	0.841638	2.89932	0.00373974	0.200788
hsa-mir-210_88609	26.7185	2.4469	0.852738	2.86946	0.00411172	NA
hsa-mir-320c-1_105547	15.527	2.07716	0.726338	2.85977	0.00423953	NA
hsa-mir-130a_65677	62.0798	1.06826	0.374048	2.85595	0.00429079	0.225017
RNY4-201_105298	638.172	-0.907159	0.320103	-2.83396	0.00459746	0.23562
hsa-mir-199a-1_116289	12.8096	-2.40324	0.848105	-2.83366	0.00460179	NA
hsa-mir-17_45481	12.0001	-3.08346	1.09415	-2.81813	0.00483046	NA
hsa-mir-451b_173960	31.1981	2.48345	0.88313	2.81209	0.004922	0.244705
hsa-mir-425_329176	817.203	1.74373	0.621083	2.80756	0.00499177	0.244705
hsa-mir-486-2_227217	82.8131	2.06175	0.738591	2.79146	0.00524709	0.24879
hsa-mir-93_291517	183.743	1.24489	0.446443	2.78847	0.00529574	0.24879
hsa-mir-451b_380114	27.0073	2.71865	0.975908	2.78577	0.0053401	NA
hsa-mir-140_22504	826.394	1.25385	0.455614	2.75199	0.00592342	0.272598
hsa-mir-451b_25065	350.556	2.2785	0.830476	2.74361	0.00607683	0.274065
hsa-mir-486-2_260369	137.92	1.97079	0.720342	2.73591	0.00622084	0.275059
hsa-mir-16-2_361359	134.758	1.20194	0.440731	2.72716	0.00638822	0.276697
hsa-mir-486-2_254515	26.4974	2.17947	0.799232	2.72696	0.00639209	NA
hsa-mir-451b_262653	75.3848	2.80752	1.0317	2.72126	0.00650345	0.276697
hsa-mir-484_195889	45.0569	-2.37312	0.875799	-2.70966	0.00673518	0.276697
hsa-mir-486-2_346953	50.5206	1.83473	0.677274	2.709	0.00674872	0.276697
hsa-mir-3184_264669	22.8544	2.44263	0.906324	2.69509	0.00703691	NA
ENST00000365448.1_96188	77.9787	1.89914	0.705849	2.69057	0.00713299	0.28723
hsa-mir-425_121535	126.697	2.13083	0.794754	2.68112	0.00733758	0.290282
hsa-mir-486-2_369505	152.309	1.94823	0.728227	2.6753	0.00746624	0.290282
hsa-mir-451b_99625	27.0954	2.23574	0.839553	2.66301	0.00774451	NA
hsa-mir-186_360555	1216.54	0.935506	0.351431	2.66199	0.00776806	0.293652
hsa-mir-25_332432	203.683	2.4206	0.909988	2.66003	0.00781336	0.293652
hsa-mir-16-1_227523	29.0664	1.1788	0.445822	2.64411	0.00819054	NA
hsa-mir-142_235814	806.12	0.982371	0.373974	2.62684	0.00861808	0.318587
hsa-mir-484_61622	130.567	-0.967637	0.36989	-2.61602	0.00889626	0.323566
hsa-mir-431_101787	160.511	-1.46988	0.563755	-2.60731	0.00912572	0.326643
hsa-mir-22_311454	19.6171	2.23221	0.856972	2.60477	0.00919368	NA
hsa-mir-30d_292268	655.546	0.938689	0.363746	2.58062	0.00986237	0.344497
RNY4-201_318931	14.6127	-3.09574	1.20044	-2.57883	0.00991342	NA
hsa-mir-451b_300149	14899.5	1.62986	0.632157	2.57825	0.00993007	0.344497
hsa-mir-486-2_323804	45.2788	2.17318	0.845055	2.57164	0.0101218	0.345828
hsa-mir-486-2_197874	95.8298	1.7335	0.678555	2.5547	0.0106281	0.353856
hsa-mir-3615_311421	164.666	2.08914	0.81821	2.5533	0.0106706	0.353856
hsa-mir-486-2_373964	41.3041	1.92152	0.756002	2.54169	0.0110319	0.360534
hsa-mir-26a-2_356240	14.9498	-2.45322	0.970432	-2.52797	0.0114725	NA
hsa-mir-301a_11813	34.4154	-1.5075	0.59732	-2.52378	0.0116102	0.363687
hsa-mir-25_47345	3617.45	1.3776	0.547114	2.51794	0.0118043	0.363687
hsa-mir-16-1_256869	80.2264	1.86491	0.744383	2.50531	0.0122346	0.363687
hsa-mir-486-2_271985	192.221	-0.818153	0.326608	-2.505	0.0122452	0.363687
hsa-mir-146a_17405	89.3772	-1.37392	0.549174	-2.5018	0.0123565	0.363687
hsa-mir-16-1_192231	71553.8	1.0692	0.42746	2.5013	0.0123739	0.363687
RNY4-201_53290	599.976	-0.54242	0.217235	-2.49693	0.0125274	0.363687
RNY1-201_320329	172.094	2.24683	0.900104	2.49619	0.0125534	0.363687
RNY1-201_346103	411.469	1.72169	0.689934	2.49545	0.0125799	0.363687
hsa-mir-1246_279549	42.9154	2.16291	0.871459	2.48194	0.0130669	0.365332
hsa-mir-451b_18787	11631.7	2.32987	0.939145	2.48084	0.0131072	0.365332
hsa-mir-25_2368	223.62	0.984652	0.39697	2.48042	0.0131228	0.365332
hsa-mir-16-1_2996	4518.07	1.67148	0.677259	2.46801	0.0135868	0.373637
hsa-mir-140_319420	23.9035	2.10383	0.85397	2.46359	0.0137554	NA
hsa-mir-486-2_327004	10752.9	1.9627	0.796941	2.46279	0.0137859	0.37385
hsa-mir-16-1_83326	32.3706	0.878162	0.357183	2.45857	0.013949	0.37385
hsa-mir-128-1_97513	302.569	-0.929645	0.379423	-2.45016	0.0142795	0.37385
RNY4P23-201_37417	17.6056	-1.864	0.762123	-2.4458	0.0144533	NA
hsa-mir-25_224288	1957.67	1.57393	0.643915	2.44432	0.0145127	0.37385
hsa-mir-486-2_256116	132.24	1.70806	0.699176	2.44297	0.0145671	0.37385
hsa-mir-654_278783	84.9175	-1.79523	0.736592	-2.43722	0.0148008	0.37385
hsa-mir-3615_276526	16.084	-2.05173	0.841959	-2.43685	0.0148157	NA
hsa-mir-486-2_353802	30.59	1.57215	0.64585	2.43423	0.0149236	0.37385
ENST00000387377.1_231586	36.6342	3.44272	1.41708	2.42944	0.015122	0.37385
hsa-mir-92a-1_191807	84.9686	-1.17596	0.484564	-2.42685	0.0152307	0.37385
hsa-mir-106b_388159	92.8856	1.73385	0.714598	2.42633	0.0152524	0.37385
hsa-mir-451b_81093	20.8887	2.65431	1.10076	2.41135	0.0158937	NA
CTD-2083E4.1-002_128732	45.008	1.80372	0.748095	2.41109	0.0159051	0.385656
hsa-let-7b_80587	21.5687	1.04892	0.435152	2.41048	0.0159317	NA
hsa-mir-340_64846	14.7712	-2.40693	0.998994	-2.40936	0.0159806	NA
tRNA-Gln-CTG-4-2_117108	16.6374	-2.11119	0.879514	-2.40041	0.0163769	NA
tRNA-Glu-TTC-14-1_262131	20.1914	3.1304	1.30592	2.39708	0.0165265	NA
hsa-mir-486-2_205817	68.593	1.52949	0.638676	2.39479	0.01663	0.398942
hsa-mir-155_280158	125.273	1.02141	0.427351	2.3901	0.0168439	0.399821
hsa-mir-486-2_71158	8.75728	1.86567	0.781332	2.3878	0.0169496	NA
hsa-mir-486-2_375007	16.5778	1.7105	0.716821	2.38623	0.0170222	NA
hsa-mir-1843_254490	27.7146	-1.09926	0.460684	-2.38616	0.0170255	NA
hsa-mir-486-2_242498	155.071	1.72805	0.724913	2.3838	0.017135	0.402495
hsa-mir-4433a_295984	98.1804	-1.60842	0.677525	-2.37396	0.0175986	0.404516
hsa-mir-486-2_70222	1174.04	1.58057	0.667904	2.36646	0.0179592	0.404516
hsa-mir-191_81813	27.7303	1.85342	0.78322	2.36641	0.0179616	NA
hsa-let-7g_139621	55.9683	1.35664	0.573692	2.36475	0.0180421	0.404516
ENST00000384770.1_28741	16.2274	-1.92381	0.814351	-2.36238	0.0181581	NA
hsa-mir-486-2_250900	99038	1.70842	0.724142	2.35923	0.0183127	0.404516
hsa-mir-550b-2_7575	73.5476	2.16805	0.919563	2.3577	0.0183887	0.404516
hsa-mir-486-2_245656	297.458	1.67553	0.71099	2.35661	0.0184425	0.404516
hsa-mir-30d_82143	957.113	0.931543	0.39613	2.35161	0.0186925	0.404516
ENST00000387377.1_328845	67.1244	3.63137	1.54443	2.35126	0.0187099	0.404516
hsa-mir-330_145504	34.9255	-2.33939	0.996005	-2.34877	0.0188355	0.404516
hsa-let-7b_312702	5562.6	1.26098	0.538495	2.34168	0.0191973	0.408396
ENST00000567819.1_79652	45.9996	0.96333	0.413253	2.33109	0.0197487	0.416199
hsa-let-7d_14272	589.74	1.19165	0.514235	2.31732	0.0204863	0.427746
hsa-mir-4433a_375976	35.0264	-2.23777	0.967777	-2.31228	0.0207622	0.42845
hsa-mir-486-2_192408	106.233	1.55766	0.674376	2.30979	0.0209	0.42845
hsa-mir-486-2_146579	57.5347	1.80027	0.781106	2.30477	0.0211797	0.430273
hsa-let-7a-1_88684	4583.39	1.08628	0.472496	2.29902	0.0215036	0.432952
hsa-mir-92a-1_46180	172.989	1.68325	0.733638	2.29439	0.0217683	0.433651
RNY4-201_139615	43.4145	1.29618	0.565599	2.2917	0.0219229	0.433651
hsa-mir-185_68917	12.3891	-1.9662	0.862262	-2.28028	0.0225913	NA
hsa-mir-7-1_43281	47.6123	1.55802	0.683501	2.27947	0.0226392	0.443926
hsa-mir-486-2_210674	26.3066	1.78359	0.783725	2.27578	0.0228591	NA
hsa-mir-140_185995	1894.23	0.877874	0.385917	2.27477	0.0229195	0.444167
hsa-mir-486-2_159889	76.1671	1.66238	0.731461	2.27268	0.0230455	0.444167
hsa-mir-122b_82585	666.257	-1.91044	0.843067	-2.26606	0.0234479	0.44531
ENST00000387441.1_250030	36.1938	3.82902	1.69761	2.25554	0.0240995	0.44531
hsa-mir-486-2_188471	55.7132	1.16021	0.514491	2.25506	0.0241297	0.44531
hsa-mir-3184_355412	120.403	0.965778	0.428583	2.25342	0.0242326	0.44531
hsa-mir-155_31202	29.0439	1.57267	0.698273	2.25222	0.0243082	NA
hsa-mir-140_334324	31.4978	1.08085	0.482026	2.2423	0.0249422	0.44531
hsa-mir-103b-1_272020	527.04	2.06779	0.922276	2.24205	0.0249582	0.44531
hsa-mir-1246_231014	61.8325	2.06784	0.922765	2.24092	0.0250315	0.44531
RNY4P10-201_177569	4461.12	-2.99426	1.33643	-2.24049	0.025059	0.44531
hsa-mir-16-2_23043	102.684	1.07303	0.478928	2.24049	0.0250593	0.44531
hsa-mir-451b_388657	24.842	2.25919	1.00923	2.23853	0.0251862	NA
hsa-mir-486-2_251876	185.692	1.58345	0.707492	2.23811	0.0252136	0.44531
ENST00000387441.1_5845	54.6062	2.93221	1.31476	2.23022	0.0257327	0.44531
hsa-mir-425_184806	4103.16	0.701303	0.314498	2.22991	0.0257535	0.44531
hsa-mir-652_128503	1163.13	-0.540935	0.242645	-2.22932	0.0257924	0.44531
hsa-let-7a-1_337648	236.261	-0.914769	0.411227	-2.22448	0.026116	0.44531
hsa-mir-223_11016	19757.1	-0.650578	0.293063	-2.21992	0.0264241	0.44531
hsa-mir-12136_42680	41.1038	1.82405	0.822605	2.21741	0.0265951	0.44531
hsa-mir-425_146815	70.5237	0.970005	0.437507	2.21712	0.0266148	0.44531
hsa-mir-106b_351513	641.246	0.846286	0.381817	2.21647	0.0266594	0.44531
RNY4P7-201_181016	17.6838	2.56653	1.15822	2.21593	0.0266962	NA
hsa-mir-30c-2_5252	183.365	0.519551	0.234819	2.21256	0.0269278	0.446486
hsa-mir-16-1_170393	23.5933	1.06979	0.485721	2.20249	0.0276308	NA
RNY4P10-201_116166	240.021	-1.20441	0.547601	-2.19944	0.0278469	0.458356
hsa-mir-326_23508	13.6101	-1.44989	0.660987	-2.19353	0.0282692	NA
hsa-mir-16-1_73952	188.803	1.07856	0.492348	2.19064	0.028478	0.458745
hsa-mir-451b_214810	37.8534	1.92499	0.880601	2.18599	0.0288161	0.458745
hsa-mir-342_360573	29.0302	-1.41758	0.649115	-2.18387	0.0289721	NA
hsa-mir-3615_83212	596.101	0.889316	0.407233	2.1838	0.0289771	0.458745
hsa-mir-126_159506	685.478	-0.687305	0.315169	-2.18075	0.0292017	0.458745
hsa-mir-146a_56286	40.5523	-1.65795	0.760376	-2.18043	0.0292257	0.458745
hsa-mir-92a-1_191157	298.943	-1.12293	0.515167	-2.17974	0.0292771	0.458745
hsa-mir-15b_97617	447.131	1.68154	0.771528	2.1795	0.0292946	0.458745
hsa-mir-486-2_78120	725.02	1.63752	0.752642	2.17569	0.0295782	0.459991
hsa-mir-223_118907	10.9848	1.80702	0.831672	2.17276	0.0297985	NA
hsa-mir-486-2_297819	22.54	1.50048	0.691827	2.16887	0.0300925	NA
hsa-mir-16-1_94708	5292.25	0.815645	0.376342	2.1673	0.0302121	0.466632
hsa-mir-185_279082	21.1295	-2.60852	1.20479	-2.16513	0.0303776	NA
hsa-mir-486-2_215223	162471	1.52931	0.708123	2.15967	0.0307983	0.469928
hsa-mir-23a_207528	68.2447	-1.14793	0.531669	-2.1591	0.0308423	0.469928
hsa-let-7e_247600	28.1635	-1.58915	0.736379	-2.15806	0.0309232	NA
hsa-mir-3184_324039	104.791	-1.2669	0.588643	-2.15224	0.0313785	0.471735
hsa-mir-16-2_122524	254.778	1.46934	0.684695	2.14597	0.0318753	0.471735
ENST00000631292.1_19911	41.8031	2.76014	1.28725	2.14422	0.0320155	0.471735
RP11-846F4.3-001_248632	16.3333	-1.79503	0.838567	-2.14059	0.0323068	NA
hsa-let-7b_262166	317.946	0.809991	0.37842	2.14045	0.0323181	0.471735
ENST00000410794.1_318435	66.0794	1.62666	0.759987	2.14038	0.0323242	0.471735
hsa-mir-486-2_271979	183.966	1.56919	0.735136	2.13456	0.0327968	0.471735
hsa-mir-21_207987	16.5063	1.32824	0.622449	2.13389	0.0328516	NA
hsa-mir-323a_160948	163.911	-1.29219	0.605736	-2.13326	0.0329036	0.471735
hsa-mir-21_66709	49.5645	-1.20768	0.566226	-2.13287	0.0329358	0.471735
hsa-mir-144_62017	29.9938	1.29442	0.607248	2.13162	0.0330382	0.471735
hsa-mir-23b_273824	71.2917	-1.29551	0.608526	-2.12894	0.0332595	0.471735
hsa-mir-223_12237	1175.93	-0.629241	0.29557	-2.12891	0.033262	0.471735
hsa-mir-320a_54210	145.574	0.948625	0.446777	2.12326	0.0337318	0.473464
hsa-mir-339_346375	40.3628	1.80817	0.852226	2.1217	0.0338629	0.473464
hsa-mir-146a_140852	38.5975	-1.48394	0.700002	-2.11991	0.0340138	0.473464
hsa-mir-95_179987	19.9431	1.50331	0.709315	2.11938	0.0340584	NA
hsa-mir-30c-2_178103	145.583	-1.20371	0.568888	-2.11589	0.034354	0.475265
hsa-let-7b_47738	492.098	0.430492	0.203843	2.11188	0.034697	0.477084
hsa-mir-486-2_339588	61.2159	1.59577	0.756526	2.10934	0.0349151	0.477173
hsa-mir-654_129121	12.0985	-1.9995	0.948691	-2.10764	0.0350619	NA
hsa-mir-409_70991	75.8887	-1.72544	0.819237	-2.10616	0.0351904	0.478038
RNY4-201_325012	21.4195	1.87486	0.890367	2.10572	0.0352289	NA
hsa-let-7b_106018	273.685	0.641845	0.30544	2.10138	0.0356075	0.480808
ENST00000491451.3_58306	60.8489	1.59903	0.766283	2.08674	0.0369121	0.491688
hsa-mir-30d_386110	115.666	0.826393	0.396382	2.08484	0.037084	0.491688
hsa-mir-140_35439	546.229	0.639151	0.306662	2.08422	0.0371403	0.491688
hsa-mir-24-2_277985	18.1291	1.5695	0.753501	2.08295	0.0372559	NA
hsa-mir-3184_316542	131.026	0.778683	0.373895	2.08262	0.0372854	0.491688
hsa-mir-155_311817	547.738	0.586126	0.281952	2.07881	0.0376345	0.493406
hsa-mir-30b_207652	11.5729	-2.04783	0.987505	-2.07374	0.0381031	NA
RNY4P16-201_236477	945.601	-1.07259	0.5174	-2.07304	0.0381687	0.497517
RP11-846F4.3-001_174940	11.9088	-1.96039	0.94604	-2.0722	0.0382467	NA
hsa-mir-486-2_286917	305.827	1.30743	0.631875	2.06913	0.0385337	0.499387
hsa-mir-92a-1_221468	339.93	1.54395	0.748312	2.06324	0.0390901	0.502868
RP3-481F12.6-001_293971	977.774	-0.859171	0.416968	-2.06052	0.0393487	0.502868
hsa-mir-487b_270677	126.889	-1.56602	0.761482	-2.05654	0.0397308	0.502868
hsa-mir-223_347976	30.0474	-2.18911	1.06458	-2.05632	0.0397519	0.502868
hsa-mir-16-1_319390	14.7868	1.18811	0.578031	2.05544	0.0398362	NA
hsa-mir-486-2_44982	68.2625	-1.07057	0.521232	-2.05391	0.039984	0.502868
RNY4P7-201_181420	28.0959	2.86529	1.39587	2.0527	0.0401019	NA
RNY4P10-201_382259	309.11	-1.20198	0.585672	-2.0523	0.0401403	0.502868
hsa-mir-140_13827	124.2	0.977326	0.477154	2.04824	0.0405365	0.505027
hsa-mir-128-1_340674	51.0006	-0.798737	0.390954	-2.04305	0.0410478	0.506541
hsa-mir-486-2_148163	20.5856	1.07196	0.524841	2.04245	0.0411065	NA
hsa-mir-144_246958	66.603	1.39339	0.682215	2.04245	0.0411073	0.506541
hsa-mir-574_375417	54.8947	-1.0845	0.532473	-2.03672	0.0416781	0.510201
hsa-mir-432_294000	646.21	-1.20962	0.594424	-2.03494	0.0418568	0.510201
hsa-mir-532_215886	167.36	1.05348	0.518747	2.03081	0.0422742	0.512517
hsa_piR_016659|gb|DQ592932|Homo_sapiens_144016	13.5161	-1.83054	0.902129	-2.02914	0.0424445	NA
hsa-mir-451b_241593	16.376	2.10086	1.0371	2.02571	0.0427946	NA
hsa-mir-10b_190341	39.277	1.40939	0.695808	2.02555	0.0428113	0.516253
RNY4-201_57661	5708.52	-0.810258	0.401616	-2.0175	0.0436438	0.517518
hsa-mir-15b_167915	355.379	0.928674	0.460432	2.01696	0.0436997	0.517518
hsa-mir-15a_160828	174.875	-0.600986	0.298122	-2.01591	0.0438098	0.517518
hsa-mir-92a-1_318788	37.1764	1.41935	0.704157	2.01567	0.0438342	0.517518
hsa-mir-223_79240	29.2761	-0.674557	0.334755	-2.01508	0.0438964	NA
hsa-mir-451b_310112	6636.89	1.23611	0.614178	2.01262	0.0441541	0.518581
hsa-mir-150_14738	20.5945	1.5212	0.758176	2.00639	0.0448147	NA
hsa-mir-324_388008	145.836	0.709596	0.353894	2.00511	0.0449516	0.525212
hsa-mir-128-1_208597	1113.8	-0.574895	0.287674	-1.99843	0.0456705	0.528348
ENST00000410717.1_242635	99.2945	-1.3375	0.669331	-1.99826	0.0456886	0.528348
hsa-mir-22_284493	64.0385	1.01279	0.507657	1.99503	0.0460395	0.52969
ENST00000387441.1_35244	51.117	2.9933	1.50616	1.98738	0.0468808	0.536631
RP3-337O18.1-012_248127	20.9975	1.8974	0.954896	1.98703	0.0469196	NA
hsa-mir-486-2_23660	37.1266	1.02674	0.517408	1.98439	0.0472123	0.537696
hsa-mir-654_172269	61.8207	-1.30355	0.661324	-1.97113	0.0487092	0.55081
tRNA-Glu-TTC-2-2_324784	167.098	1.13972	0.578572	1.96988	0.0488524	0.55081
RNY1-201_196932	49.1467	2.81954	1.43489	1.96498	0.0494161	0.552883
hsa-mir-126_238497	44.186	-1.29601	0.659874	-1.96403	0.0495266	0.552883
hsa-mir-486-2_229448	15.1494	1.02107	0.520082	1.96328	0.049614	NA
hsa-let-7d_86986	13.1528	-1.6307	0.83264	-1.95847	0.0501753	NA
tRNA-Glu-CTC-1-7_258532	71.433	2.75169	1.40758	1.95491	0.0505938	0.558614
hsa-mir-496_327207	8.68212	2.36567	1.21039	1.95447	0.0506452	NA
hsa-let-7a-1_357992	51.6431	-0.765494	0.392016	-1.95271	0.0508537	0.558614
hsa_piR_016658|gb|DQ592931|Homo_sapiens_267799	123.685	-1.46301	0.749722	-1.95141	0.0510085	0.558614
hsa-mir-744_344834	183.563	-0.528576	0.270895	-1.95122	0.0510308	0.558614
hsa-mir-29a_16787	25.4363	1.74389	0.894612	1.94933	0.0512561	NA
hsa-mir-193a_212493	11.8176	-2.13146	1.09362	-1.94899	0.0512964	NA
hsa-mir-16-2_378727	55.8146	0.954202	0.489957	1.94752	0.0514723	0.560156
hsa-mir-223_100383	25.0292	1.33835	0.687709	1.94611	0.0516421	NA
RNY4P7-201_199405	61.9211	2.95486	1.51852	1.94589	0.0516685	0.560156
hsa-mir-92a-1_259425	6018.77	1.50379	0.773649	1.94376	0.0519241	0.560233
hsa-mir-451b_28774	15.2655	1.56378	0.804789	1.9431	0.0520044	NA
hsa-mir-30d_66019	97.2545	1.97993	1.02193	1.93744	0.0526913	0.563698
hsa-mir-25_166606	40.6494	0.967535	0.499501	1.937	0.0527452	0.563698
hsa-mir-4433a_40128	29.1842	-2.0386	1.05285	-1.93628	0.0528339	NA
hsa-mir-7-1_14493	140.873	0.963111	0.498532	1.93189	0.0533728	0.565813
ENST00000410717.1_283120	523.35	-1.32819	0.687716	-1.93131	0.0534449	0.565813
hsa-mir-345_178322	16.7934	0.980584	0.507968	1.93041	0.0535566	NA
hsa-mir-1249_274136	165.974	-0.884305	0.458513	-1.92864	0.053776	0.566658
hsa-mir-20a_106686	119.874	-1.06906	0.555112	-1.92584	0.0541238	0.567671
hsa-mir-92a-1_177768	95.4042	1.65314	0.860496	1.92115	0.0547126	0.568315
RNY4P7-201_221643	11.9267	2.55144	1.32968	1.91883	0.0550055	NA
hsa-mir-16-2_164190	23.2815	0.997645	0.521183	1.91419	0.0555954	NA
ENST00000387421.1_285086	20.268	-1.28829	0.673044	-1.91413	0.0556042	NA
RNY3-201_253702	25.4722	-1.34379	0.702654	-1.91245	0.055818	NA
hsa-mir-92a-1_327593	1282.88	-0.924431	0.483532	-1.91183	0.055898	0.568315
ENST00000362512.1_337937	19.8198	-1.93601	1.01272	-1.9117	0.0559152	NA
hsa-mir-486-2_128704	34.4641	1.50024	0.784803	1.91161	0.0559264	0.568315
hsa-mir-199a-1_111165	40.0476	-1.38287	0.723934	-1.91022	0.0561053	0.568315
RP11-752G15.5-002_330089	161.968	-1.31398	0.688228	-1.90923	0.056233	0.568315
hsa-mir-486-2_29847	70.4418	1.90741	1.00046	1.90654	0.0565806	0.568315
hsa-mir-128-1_227737	116.676	1.18942	0.624177	1.90558	0.0567053	0.568315
RNY4P18-201_107978	16.0781	-1.82879	0.959719	-1.90555	0.0567088	NA
hsa-mir-421_189811	132.968	0.682364	0.358118	1.90542	0.0567255	0.568315
hsa-mir-486-2_338827	43361	1.26028	0.661662	1.90472	0.0568163	0.568315
hsa-mir-324_148421	57.4668	1.03341	0.542697	1.90421	0.0568824	0.568315
hsa-mir-223_319955	67.9961	-0.801235	0.420897	-1.90364	0.0569575	0.568315
hsa-mir-223_379138	27507.6	-0.540409	0.284439	-1.89991	0.057445	0.570654
hsa-mir-340_355700	15.9336	-2.4567	1.2972	-1.89385	0.0582453	NA
hsa-mir-486-2_291585	18.4871	1.42896	0.754798	1.89317	0.0583353	NA
hsa-let-7f-2_298080	1913.16	0.877927	0.463838	1.89274	0.0583918	0.577516
hsa-mir-484_285702	177.147	-0.708429	0.375159	-1.88834	0.05898	0.580786
hsa-let-7i_57189	685.094	1.16849	0.62049	1.88318	0.0596763	0.585087
hsa-mir-186_60176	20.5361	1.69445	0.900535	1.88161	0.0598894	NA
hsa_piR_016659|gb|DQ592932|Homo_sapiens_132497	14.6408	2.78822	1.48232	1.88098	0.0599744	NA
RNY4P7-201_79305	83.8962	2.86593	1.52622	1.87779	0.0604097	0.589714
hsa-mir-15b_22930	71.979	-0.647003	0.345821	-1.87092	0.0613565	0.591768
hsa-mir-125a_48966	11.9782	1.35727	0.726407	1.86848	0.0616956	NA
CTD-2083E4.1-002_54147	78.9519	1.32519	0.709494	1.8678	0.0617897	0.591768
hsa-mir-130b_42509	52.0047	-1.03763	0.555592	-1.86762	0.0618153	0.591768
hsa-let-7b_103143	19.5056	1.28111	0.686145	1.86711	0.0618864	NA
hsa-mir-130b_113566	15.7184	1.15599	0.619614	1.86566	0.0620895	NA
hsa-mir-122b_271490	361.954	-1.53885	0.825514	-1.86411	0.0623064	0.591768
hsa-mir-574_13392	72.3164	1.25939	0.675618	1.86406	0.0623133	0.591768
RNY4P14-201_285430	68.4564	1.26996	0.681296	1.86404	0.0623168	0.591768
hsa-mir-451b_309627	121.347	1.40469	0.753977	1.86304	0.0624571	0.591768
hsa-mir-92b_162638	18.4967	2.19592	1.18507	1.85299	0.0638844	NA
ENST00000387400.1_204453	72.935	0.971522	0.524793	1.85125	0.0641339	0.605113
hsa-mir-223_57633	93.2645	-0.920323	0.498458	-1.84634	0.0648429	0.60697
hsa-mir-486-2_34632	73.783	1.93338	1.04725	1.84616	0.064869	0.60697
hsa-mir-126_269354	199.961	-0.57588	0.312284	-1.84409	0.0651704	0.60727
RNY4P10-201_105378	113.198	0.78757	0.429029	1.83571	0.0664013	0.616193
tRNA-Leu-TAG-1-1_376687	15.5555	-1.38364	0.753765	-1.83564	0.066411	NA
RNY1P12-201_58926	144.56	0.830065	0.45322	1.83148	0.0670286	0.618989
hsa-mir-26a-2_3021	63.0653	-1.14972	0.628389	-1.82964	0.0673045	0.618989
hsa-let-7d_88215	105.507	-0.715906	0.391837	-1.82705	0.067692	0.618989
hsa-let-7d_275847	1407.02	-0.534042	0.292413	-1.82633	0.0678006	0.618989
hsa-mir-16-2_169027	27.2201	0.872269	0.478436	1.82317	0.0682778	NA
hsa-mir-451b_309497	16.8796	2.41207	1.32447	1.82117	0.0685814	NA
hsa-mir-340_227325	14.2346	-1.99373	1.09595	-1.81918	0.0688838	NA
hsa-let-7d_374627	2333.52	-0.565812	0.311164	-1.81837	0.0690074	0.627467
hsa-mir-26a-2_218556	12.5243	-1.15775	0.637044	-1.81738	0.0691585	NA
ENST00000540957.1_194067	33.7688	-1.28444	0.708142	-1.81382	0.0697051	0.631265
ENST00000554988.1_222090	21.0744	-1.4877	0.820475	-1.81322	0.0697979	NA
tRNA-Glu-CTC-1-7_117067	20.7673	0.693278	0.382792	1.81111	0.0701238	NA
hsa-mir-196b_278020	65.8096	0.801072	0.443543	1.80608	0.0709066	0.639578
hsa-mir-328_357042	929.51	-0.502826	0.279034	-1.80202	0.071542	0.642738
hsa-mir-532_242003	38.3671	0.923958	0.514302	1.79653	0.0724109	0.645797
hsa-mir-146a_387114	287.766	-0.665152	0.370301	-1.79625	0.0724553	0.645797
hsa-mir-3615_27665	15.9343	1.59692	0.889856	1.79458	0.0727206	NA
hsa-mir-199a-1_337750	589.285	-0.667884	0.37286	-1.79125	0.0732537	0.649364
hsa_piR_018570|gb|DQ595536|Homo_sapiens_86916	17.4368	2.57826	1.4401	1.79034	0.0734	NA
hsa-mir-411_75002	36.5006	-1.02406	0.572138	-1.78989	0.0734724	0.649364
hsa-let-7b_154028	17.3738	2.26372	1.26497	1.78954	0.0735277	NA
hsa-mir-223_116964	18.7329	-0.896764	0.501524	-1.78808	0.0737635	NA
hsa-let-7a-2_25678	28.1665	-1.2383	0.692584	-1.78794	0.0737863	NA
hsa-mir-93_280982	16.4042	1.63921	0.917302	1.78698	0.07394	NA
hsa-mir-223_348788	87.9552	1.13224	0.633681	1.78676	0.0739764	0.649364
hsa-mir-375_149617	20.9246	1.33165	0.745552	1.78613	0.074078	NA
hsa-mir-486-2_159224	251.081	1.36065	0.762087	1.78542	0.0741928	0.649364
hsa-mir-92a-2_184400	62.8926	-1.06632	0.597756	-1.78387	0.0744446	0.649364
hsa-mir-30d_118230	1410.7	-0.569716	0.319523	-1.78302	0.0745832	0.649364
hsa-mir-16-2_329303	116.612	0.941618	0.529294	1.77901	0.0752384	0.651093
hsa-mir-30c-2_322632	258.722	1.01706	0.571936	1.77827	0.0753593	0.651093
RP11-846F4.3-001_316474	41.5014	-1.74491	0.983612	-1.77398	0.0760658	0.652362
hsa-mir-146a_97502	807.461	-0.723246	0.407722	-1.77387	0.0760848	0.652362
hsa-let-7f-2_386158	60.5132	-0.84776	0.478613	-1.77129	0.0765132	0.65355
hsa-mir-15a_53605	94.1932	-0.690662	0.390483	-1.76874	0.0769379	0.654698
hsa-mir-30c-2_281099	26.5265	1.79609	1.0158	1.76815	0.0770366	NA
hsa-let-7f-1_231804	62.9207	-1.27305	0.720701	-1.76641	0.0773274	0.655538
hsa-mir-877_101302	23.6822	1.16139	0.658648	1.76329	0.0778517	NA
RP11-846F4.3-001_222164	34.784	-0.854626	0.484996	-1.76213	0.0780477	0.659167
ENST00000365274.1_158024	31.5336	-1.14084	0.649468	-1.75658	0.0789893	0.662314
RNY4P23-201_12764	55.9666	-2.20809	1.25712	-1.75647	0.0790077	0.662314
hsa-mir-29b-2_53190	10.9713	-1.7002	0.970072	-1.75266	0.0796608	NA
RNY4-201_77586	116.843	-1.08394	0.618569	-1.75234	0.0797153	0.664363
hsa-mir-223_340143	211.142	-0.784285	0.447752	-1.75161	0.0798415	0.664363
hsa-mir-486-2_321265	41.0463	1.96117	1.12098	1.74951	0.0802034	0.664921
hsa-mir-92a-1_354683	130.941	-0.846978	0.485078	-1.74606	0.0807997	0.665276
hsa-mir-29a_352458	70.6712	0.710534	0.406983	1.74585	0.0808362	0.665276
tRNA-Glu-CTC-1-7_319879	13.9567	1.41998	0.813831	1.7448	0.0810188	NA
hsa-let-7i_24180	153.976	1.02929	0.591826	1.73917	0.0820047	0.672438
hsa-mir-25_92510	15.7448	0.918726	0.528643	1.7379	0.0822292	NA
hsa-mir-486-2_386489	93.522	1.49407	0.861655	1.73396	0.0829256	0.677304
hsa-mir-486-2_232727	24.0511	1.4479	0.835448	1.73308	0.0830814	NA
RNY4P18-201_67247	20.1706	-1.96049	1.13134	-1.73289	0.0831149	NA
hsa-mir-1249_351187	88.364	-1.06312	0.61366	-1.73242	0.0831988	0.677304
hsa-mir-132_322910	9.45125	-1.64418	0.951073	-1.72877	0.083851	NA
hsa-mir-27b_102749	33.7821	-0.793955	0.459276	-1.72871	0.0838612	0.680241
hsa-mir-3184_40887	1807.24	1.23189	0.714269	1.72469	0.0845841	0.683646
hsa-mir-194-1_388745	22.0759	-1.31576	0.763141	-1.72414	0.0846833	NA
hsa-mir-320b-1_345809	30.1516	1.32291	0.768152	1.7222	0.085033	0.684819
hsa-mir-378a_156311	20.9945	1.04407	0.607897	1.71752	0.0858848	NA
hsa-mir-654_84321	26.5343	-0.976244	0.568565	-1.71703	0.0859732	NA
RP11-752G15.5-002_164610	20.7877	1.98681	1.15879	1.71456	0.0864268	NA
hsa-let-7d_256447	44.8205	-0.942772	0.552599	-1.70607	0.0879952	0.706154
RNY3-201_259692	28.0405	2.51828	1.4763	1.7058	0.0880445	NA
hsa-mir-127_217052	21.9096	-1.70933	1.00302	-1.70418	0.088347	NA
hsa-mir-328_89631	227.536	-0.588378	0.345389	-1.70352	0.08847	0.706515
hsa_piR_020829|gb|DQ598677|Homo_sapiens_342976	37.7059	0.646414	0.379987	1.70115	0.0889153	0.706515
hsa-mir-92a-1_55913	1148.44	-0.515442	0.303058	-1.7008	0.0889802	0.706515
hsa-let-7c_115512	36.6326	1.06042	0.625151	1.69627	0.0898352	0.710802
ENST00000387459.1_151301	20.7584	-1.45552	0.858579	-1.69527	0.090025	NA
hsa-mir-556_58822	22.7223	-1.50346	0.887481	-1.69407	0.0902511	NA
hsa-mir-342_37534	40.4171	1.08569	0.64187	1.69145	0.0907506	0.713881
hsa-mir-486-2_31931	29.8644	1.04744	0.619461	1.69089	0.0908576	0.713881
hsa-mir-3615_294119	17.0491	1.69824	1.0046	1.69046	0.0909401	NA
hsa-let-7d_98492	53.1493	-0.729598	0.43279	-1.6858	0.0918341	0.71425
hsa-mir-181b-2_63530	39.0573	0.862413	0.512234	1.68363	0.0922532	0.71425
hsa-mir-652_177032	280.231	-0.518894	0.308844	-1.68011	0.0929351	0.71425
hsa-mir-320b-1_287521	28.0589	-2.2244	1.324	-1.68007	0.0929442	NA
hsa-mir-151a_301748	333.001	0.555816	0.330852	1.67996	0.092966	0.71425
hsa-mir-92a-1_209375	843.808	-0.65118	0.387621	-1.67994	0.0929692	0.71425
RNY4-201_221171	170.542	-1.0051	0.598556	-1.67921	0.0931116	0.71425
hsa-mir-15a_225925	543.289	1.28068	0.76277	1.67899	0.0931539	0.71425
hsa-mir-223_214688	12.3791	-0.991118	0.590481	-1.67849	0.0932509	NA
hsa-mir-425_21609	20.6807	1.61454	0.962196	1.67797	0.0933525	NA
hsa-mir-146a_77366	13.6233	-1.79336	1.0688	-1.67792	0.0933632	NA
hsa-mir-323a_370846	171.388	-0.950066	0.566347	-1.67753	0.0934385	0.71425
hsa-mir-92a-2_337828	19.5336	0.963477	0.57506	1.67544	0.0938481	NA
hsa-mir-142_94181	21.6033	-1.32694	0.792997	-1.67332	0.0942647	NA
RNY4-201_290984	1184.67	-0.711705	0.425764	-1.67159	0.0946044	0.716467
hsa-mir-25_240313	32.8725	1.87576	1.12367	1.66933	0.0950529	0.716467
hsa-mir-484_68837	861.33	-0.517823	0.310244	-1.66908	0.0951012	0.716467
RP11-752G15.5-002_248882	25.9219	-2.16459	1.29768	-1.66804	0.0953069	NA
RP11-846F4.3-001_259358	71.6642	-0.942459	0.56511	-1.66774	0.0953664	0.716467
hsa-mir-21_95115	58.0502	0.855771	0.513257	1.66734	0.0954476	0.716467
hsa-mir-126_83940	4719.78	-0.457365	0.274648	-1.66527	0.095858	0.716467
hsa-mir-342_320143	43.5116	-1.35584	0.814418	-1.6648	0.0959526	0.716467
hsa-mir-127_88319	18.6601	-1.67024	1.00517	-1.66164	0.0965853	NA
ENST00000449439.1_152365	25.6272	1.24755	0.750861	1.66149	0.0966152	NA
hsa-mir-15b_63568	201.236	0.791228	0.476785	1.65951	0.0970134	0.719587
hsa-mir-376c_227711	30.6144	-1.25863	0.758612	-1.65912	0.0970922	0.719587
RNY4-201_246270	18.8543	2.13222	1.28524	1.65901	0.0971146	NA
RP11-846F4.3-001_329761	20.3215	-1.8429	1.11134	-1.65827	0.0972631	NA
ENST00000390392.3_192118	18.1924	-2.0214	1.21914	-1.65806	0.0973055	NA
hsa-mir-486-2_122626	354.136	-0.837722	0.5055	-1.65722	0.097476	0.719587
hsa-mir-92b_52761	46.5654	1.10679	0.668408	1.65587	0.097749	0.719587
RNY4-201_104678	134.002	-2.06539	1.2489	-1.65377	0.0981737	0.719587
hsa-mir-146a_25522	4053.45	-0.753979	0.456117	-1.65304	0.0983228	0.719587
ENST00000631292.1_378204	55.1038	1.70912	1.03499	1.65134	0.098669	0.719587
hsa-mir-451b_125517	40.5772	1.98788	1.20471	1.6501	0.0989233	0.719587
hsa-mir-21_18582	21.4629	-0.962977	0.583874	-1.64929	0.0990883	NA
hsa-mir-150_69561	19.9223	1.24451	0.755911	1.64637	0.0996878	NA
hsa-mir-16-1_34005	24.7266	-1.27266	0.773072	-1.64624	0.0997146	NA
hsa-mir-106b_76157	30.6635	0.800096	0.487366	1.64167	0.100658	0.726389
hsa-mir-486-2_69594	24.257	1.6583	1.01036	1.6413	0.100735	NA
hsa-mir-4433a_295873	31.0074	-1.61147	0.982061	-1.64091	0.100817	0.726389
hsa-let-7a-1_178948	15.3176	-0.87443	0.533153	-1.64011	0.100982	NA
hsa-mir-425_225847	157.458	0.639625	0.390122	1.63955	0.101098	0.726389
hsa-mir-223_66968	26.2078	-0.715306	0.436617	-1.63829	0.101361	NA
hsa-mir-361_30784	17.0234	1.53462	0.936941	1.63791	0.101441	NA
RNY4P10-201_181448	124.843	2.7684	1.69031	1.63781	0.101462	0.726389
hsa-let-7d_251956	36.0612	-1.34609	0.821904	-1.63777	0.101469	0.726389
hsa-mir-26a-2_60254	18.907	1.65581	1.01159	1.63684	0.101664	NA
hsa-mir-10b_40203	86.2037	0.837717	0.51257	1.63435	0.102186	0.727738
RP11-846F4.3-001_3905	158.994	-0.87109	0.533192	-1.63373	0.102316	0.727738
hsa-mir-181a-2_319304	3032.09	-0.451024	0.27632	-1.63226	0.102626	0.727738
hsa-mir-432_167722	279.169	-1.17056	0.71859	-1.62897	0.10332	0.728211
hsa-mir-17_141595	172.813	-0.94155	0.578035	-1.62888	0.103338	0.728211
hsa-mir-16-1_59183	15.886	0.877104	0.538742	1.62806	0.103512	NA
hsa-mir-223_126531	16.6448	-1.6512	1.01472	-1.62725	0.103684	NA
hsa-mir-148a_148527	21.8072	1.21743	0.74847	1.62656	0.103831	NA
hsa-mir-328_70729	15.4294	1.99332	1.22978	1.62088	0.105044	NA
hsa-mir-1976_260297	11.6795	1.92997	1.19196	1.61916	0.105413	NA
RNY4-201_197299	867.991	-0.99444	0.614306	-1.6188	0.10549	0.741058
hsa-mir-29c_313926	22.0761	1.60265	0.990829	1.61748	0.105774	NA
tRNA-Asp-GTC-2-9_87812	17.8854	2.04236	1.26271	1.61744	0.105784	NA
RP11-846F4.3-001_37208	68.1679	-0.762376	0.47193	-1.61544	0.106215	0.743834
RNY4-201_215978	43.4765	-2.01317	1.24785	-1.61331	0.106678	0.744686
hsa-mir-25_196240	98.7691	2.29794	1.42632	1.6111	0.107158	0.744686
hsa-mir-92a-1_157430	2565.76	1.01036	0.627482	1.61018	0.107357	0.744686
RP3-337O18.1-012_386202	33.1273	1.07886	0.670596	1.60881	0.107657	0.744686
hsa-let-7b_239309	23.4368	1.4777	0.918739	1.6084	0.107749	NA
hsa-mir-24-2_286810	36.3129	-0.771502	0.480086	-1.60701	0.108053	0.74492
RNY4P16-201_18896	214.101	-0.57812	0.360099	-1.60545	0.108395	0.74492
hsa-mir-142_331749	88.809	-0.742062	0.463131	-1.60227	0.109095	0.74492
hsa-mir-486-2_276514	84.0068	1.34522	0.839763	1.60191	0.109175	0.74492
hsa-mir-30a_73268	14.7607	-1.56301	0.976161	-1.60118	0.109337	NA
hsa-mir-16-2_323337	125.462	1.29698	0.810026	1.60115	0.109343	0.74492
RP11-846F4.3-001_113286	10.5675	2.2705	1.41848	1.60066	0.109452	NA
hsa-mir-374a_275759	144.633	-0.910533	0.569893	-1.59773	0.110104	0.747639
hsa-mir-16-2_327064	93.0842	0.879739	0.551313	1.59572	0.110552	0.747639
hsa-mir-223_102627	31.2875	-1.03674	0.65042	-1.59395	0.110947	0.747639
RP11-694I15.3-001_349359	11.0669	-2.33787	1.46696	-1.59369	0.111007	NA
RNY4P10-201_131705	87.9018	2.56955	1.61261	1.59341	0.111068	0.747639
hsa-mir-26a-2_141330	20.0723	-0.848506	0.532958	-1.59207	0.111369	NA
hsa-mir-15a_234346	678.764	0.765717	0.481018	1.59187	0.111415	0.747739
ENST00000410794.1_87152	26.5863	1.21473	0.765003	1.58788	0.112313	NA
hsa-mir-148b_329438	339.414	-0.924112	0.582018	-1.58777	0.112338	0.751697
hsa-mir-142_188517	57.8501	1.06553	0.674057	1.58077	0.113931	0.759676
hsa-mir-486-2_203228	31.628	1.34807	0.853439	1.57958	0.114204	0.759676
hsa-mir-12136_150999	26.9366	2.02864	1.28508	1.57862	0.114424	NA
hsa-mir-92a-2_262162	15.234	0.787841	0.49946	1.57738	0.114707	NA
tRNA-Ser-GCT-6-1_288120	56.3444	0.585447	0.371447	1.57613	0.114997	0.762315
RP3-481F12.6-001_351854	64.608	0.944787	0.60008	1.57443	0.115387	0.762315
hsa-mir-3615_162933	50.6862	1.07632	0.684049	1.57345	0.115615	0.762315
hsa-mir-29b-2_167309	60.3953	1.0811	0.688338	1.5706	0.116277	0.762723
hsa-mir-25_222963	29.2808	1.21699	0.77511	1.57008	0.116396	NA
tRNA-Leu-CAG-2-2_325725	27.4351	-1.91069	1.21812	-1.56857	0.116749	NA
hsa-mir-25_231405	14.1551	1.42384	0.907937	1.56821	0.116832	NA
hsa-mir-330_241722	44.8374	-0.665544	0.4245	-1.56783	0.11692	0.762723
hsa-mir-139_33895	17.2396	-1.30569	0.833113	-1.56724	0.117059	NA
hsa-let-7f-2_275609	6071.18	-0.435547	0.278152	-1.56586	0.117381	0.762723
hsa-mir-340_345456	465.229	-0.977246	0.624654	-1.56446	0.11771	0.762723
hsa-mir-320a_17488	36.5536	-1.52001	0.972038	-1.56374	0.117879	0.762723
hsa-mir-150_361602	67.2901	0.934297	0.597661	1.56326	0.117992	0.762723
RNY4P14-201_313417	55.9881	-1.18419	0.757624	-1.56303	0.118045	0.762723
ENST00000387400.1_163357	101.893	0.894463	0.572796	1.56158	0.118388	0.762757
hsa-mir-18a_146886	15.6408	1.2296	0.788621	1.55917	0.118955	NA
hsa-mir-30d_131142	1367.86	0.665821	0.427588	1.55716	0.119433	0.7673
tRNA-Gly-TCC-3-1_128745	15.4258	1.45693	0.93658	1.55559	0.119807	NA
hsa-mir-15b_45232	30.92	2.04544	1.31544	1.55495	0.119957	0.767408
RP11-203J14.1-001_324339	41.227	-1.73375	1.11572	-1.55393	0.120201	0.767408
hsa-mir-409_149220	211.074	-0.898148	0.578406	-1.5528	0.120471	0.767408
tRNA-Val-CAC-4-1_279091	44.8369	2.45411	1.58337	1.54993	0.121159	0.769616
hsa-mir-100_111416	29.2524	1.82203	1.17686	1.54821	0.121571	NA
hsa-mir-10a_148343	141.42	0.803711	0.519192	1.548	0.121621	0.770382
hsa-mir-223_57423	34.6844	1.07419	0.695889	1.54362	0.12268	0.773051
hsa-mir-486-2_162670	80.1901	1.35747	0.879518	1.54342	0.122728	0.773051
hsa-mir-26b_229984	16.2323	1.35268	0.878349	1.54003	0.123554	NA
hsa-mir-139_239740	54.1791	0.840922	0.546212	1.53955	0.123669	0.776807
hsa-mir-12136_357425	33.13	0.92858	0.603865	1.53773	0.124115	0.777443
hsa-let-7b_319125	186.447	0.6623	0.431489	1.53492	0.124804	0.779595
hsa-mir-182_296622	23.6951	1.0558	0.689249	1.53181	0.125569	NA
hsa-mir-30d_334124	18.9348	-1.30341	0.852325	-1.52923	0.126206	NA
hsa-mir-199a-1_192709	281.224	-0.629951	0.412179	-1.52834	0.126427	0.787162
hsa-mir-26a-2_258584	1016.53	0.570367	0.373535	1.52694	0.126775	0.787162
hsa-mir-484_271349	49.0767	0.872516	0.571847	1.52579	0.127063	0.787162
hsa-mir-550b-2_368866	29.2675	-1.11188	0.729152	-1.5249	0.127285	NA
RNY4P10-201_100942	23.0458	1.98954	1.30602	1.52336	0.127669	NA
hsa-mir-223_109179	25.5467	-1.2199	0.802903	-1.51936	0.128672	NA
hsa-mir-10b_12801	304.732	0.879062	0.578587	1.51932	0.128681	0.787912
hsa-let-7b_201643	31.069	0.813307	0.535563	1.5186	0.128863	0.787912
hsa-mir-3184_131420	268.685	0.9515	0.626714	1.51824	0.128955	0.787912
hsa-mir-629_374173	72.4876	1.10201	0.726101	1.51771	0.129087	0.787912
hsa-mir-505_317694	19.2504	-1.41051	0.929739	-1.5171	0.129241	NA
hsa-mir-30c-2_301270	53.8609	1.02635	0.676689	1.51672	0.129338	0.787912
hsa-mir-320c-1_310012	54.0159	-1.08379	0.7146	-1.51664	0.129357	0.787912
RP11-147L20.3-001_104192	12.6176	1.53017	1.00932	1.51603	0.129511	NA
hsa-mir-486-2_160534	220.216	1.09253	0.721906	1.5134	0.130179	0.787912
hsa-mir-223_162627	182.974	-0.855389	0.565324	-1.51309	0.130256	0.787912
hsa-mir-15a_196342	152.263	-0.823858	0.544879	-1.512	0.130533	0.787912
hsa-mir-411_305915	43.6797	-1.33257	0.881663	-1.51143	0.130678	0.787912
hsa-let-7b_197740	12.5312	1.28052	0.847229	1.51142	0.130681	NA
hsa-mir-128-1_369261	14.4514	1.59588	1.05619	1.51098	0.130795	NA
hsa-mir-28_150223	36.3206	0.83463	0.552752	1.50995	0.131055	0.788079
hsa-mir-181a-2_142095	16.9532	-1.82406	1.20874	-1.50906	0.131282	NA
hsa-mir-25_169999	14.6694	-1.15476	0.765354	-1.50879	0.131351	NA
RNY3-201_227725	29.7997	-1.06729	0.708259	-1.50692	0.131831	0.790637
RNY4P7-201_134413	26.4214	2.01463	1.33989	1.50358	0.132689	NA
hsa-mir-182_250289	359.895	-0.66141	0.440387	-1.50188	0.133127	0.795776
hsa-mir-106b_99152	21.9985	1.16672	0.777484	1.50063	0.133451	NA
hsa-mir-30a_148664	32.957	0.974338	0.64973	1.4996	0.133717	0.795776
RP11-9F19.1-002_248569	20.0465	2.02677	1.35168	1.49944	0.13376	NA
hsa-mir-16-2_377040	31.4009	0.773986	0.516929	1.49728	0.134321	0.795776
ENST00000631292.1_200542	88.5102	2.26403	1.51212	1.49726	0.134326	0.795776
RNY4P10-201_160572	127.075	2.31733	1.54822	1.49677	0.134453	0.795776
hsa-let-7f-2_206938	27.9315	-0.637964	0.426734	-1.49499	0.134917	NA
RNY4P7-201_107132	121.394	-1.14046	0.763164	-1.49439	0.135074	0.797362
hsa-mir-103b-1_197495	4202.12	-0.550605	0.36903	-1.49203	0.13569	0.798023
RNY4P7-201_254947	72.8657	2.25805	1.51419	1.49126	0.135894	0.798023
RNY4P23-201_236645	14.4054	-1.42371	0.957942	-1.48622	0.137221	NA
hsa-mir-433_55275	101.621	-1.38267	0.930807	-1.48546	0.137423	0.804907
hsa-mir-92a-2_18914	26.8568	1.19402	0.803971	1.48515	0.137503	NA
hsa-mir-1307_175765	316.483	0.357501	0.241298	1.48158	0.138453	0.805755
hsa-mir-26a-2_95803	49.8793	1.02793	0.693994	1.48119	0.138557	0.805755
hsa-mir-92a-1_119155	59.8554	0.857174	0.5793	1.47967	0.138961	0.805755
hsa-mir-328_355682	129.983	-0.786796	0.532073	-1.47874	0.139211	0.805755
hsa-mir-361_3222	114.218	0.448724	0.303704	1.4775	0.13954	0.805755
hsa-mir-4433a_255320	13.7351	-1.90442	1.28896	-1.47749	0.139544	NA
hsa-mir-493_383039	96.7334	-1.48208	1.00473	-1.4751	0.140186	0.805755
hsa-mir-15a_8704	44.1624	-1.39722	0.947417	-1.47477	0.140275	0.805755
hsa-mir-26b_140684	16.0142	-2.06427	1.39998	-1.4745	0.140346	NA
RNY4P23-201_222243	2504.3	-0.76844	0.521629	-1.47315	0.14071	0.805755
RNY4P14-201_289370	20.1867	-1.96232	1.33227	-1.47291	0.140774	NA
RP11-846F4.3-001_202402	275.838	-0.862925	0.585877	-1.47288	0.140784	0.805755
hsa-mir-27a_162428	52.8651	-0.92466	0.631233	-1.46485	0.142962	0.814434
hsa-mir-425_8847	33.2038	-0.79607	0.543688	-1.4642	0.143138	0.814434
ENST00000362765.1_212617	39.3361	-0.899999	0.615045	-1.46331	0.143384	0.814434
RNY4-201_333477	28.3595	1.25968	0.861059	1.46294	0.143483	NA
RNY4P10-201_380951	86.0335	2.31296	1.58262	1.46147	0.143885	0.815229
hsa_piR_016659|gb|DQ592932|Homo_sapiens_389395	50.6993	2.01525	1.38371	1.45641	0.145278	0.819418
hsa-mir-15b_358452	21.6203	0.654998	0.449959	1.45569	0.14548	NA
hsa-mir-17_108999	24.9967	-1.29564	0.890526	-1.45491	0.145693	NA
hsa-mir-4433a_326219	53.7071	-0.60538	0.416342	-1.45404	0.145934	0.819418
hsa-mir-3184_102770	928.23	-0.75165	0.51708	-1.45364	0.146045	0.819418
ENST00000384478.1_23036	60.724	0.563065	0.387679	1.4524	0.146391	0.819418
hsa-mir-326_130773	103.133	-0.547393	0.376936	-1.45222	0.146441	0.819418
hsa-mir-486-2_119821	115.874	1.04019	0.717388	1.44997	0.147066	0.819785
hsa-mir-10b_163854	139.896	0.677885	0.46771	1.44937	0.147234	0.819785
hsa-let-7i_325262	18.4064	-1.66787	1.15078	-1.44934	0.147242	NA
RP11-317N8.1-001_132601	23.868	-1.66027	1.14743	-1.44695	0.14791	NA
hsa-mir-425_8959	22.0974	1.08718	0.751398	1.44688	0.147931	NA
hsa-mir-4446_293370	33.2216	-1.58966	1.09913	-1.44628	0.148098	0.821277
hsa-mir-486-2_253079	12.5219	1.10561	0.764648	1.44591	0.148202	NA
hsa-mir-320a_364398	139.704	0.945248	0.653784	1.44581	0.14823	0.821277
hsa-mir-451b_33791	26.1202	1.14561	0.792535	1.4455	0.148317	NA
hsa-let-7b_231475	31.376	0.922413	0.638656	1.4443	0.148654	0.821604
RNY4P20-201_322127	15.0394	2.29499	1.59439	1.43942	0.150033	NA
hsa-mir-10b_141624	46.9103	0.972479	0.675619	1.43939	0.15004	0.827239
hsa-mir-204_99708	18.8885	-1.59121	1.10603	-1.43866	0.150246	NA
hsa-mir-3184_244505	47.0436	-0.57128	0.397563	-1.43695	0.150731	0.829021
RNY4-201_140303	28.9402	1.94542	1.35551	1.43519	0.151234	NA
hsa-mir-486-2_311138	26.1335	1.17529	0.819398	1.43434	0.151476	NA
hsa-mir-106b_239215	31.8336	0.919332	0.641264	1.43362	0.151679	0.832207
RNY3P2-201_108942	22.9012	1.89115	1.31916	1.4336	0.151686	NA
hsa-mir-26a-2_214755	372.037	-0.538581	0.376198	-1.43164	0.152246	0.833289
hsa-mir-21_244101	2125.43	-0.630938	0.441262	-1.42985	0.15276	0.834078
hsa-mir-155_15534	241.777	0.584817	0.409623	1.42769	0.15338	0.834869
hsa-mir-370_94665	87.6114	-1.12397	0.788556	-1.42535	0.154057	0.834869
RP11-192K2.3-014_277388	35.1612	-1.9519	1.37021	-1.42453	0.154295	0.834869
hsa-mir-30a_107952	72.9137	0.793752	0.5578	1.423	0.154735	0.834869
RP11-823O21.1-005_271090	21.0626	1.68081	1.18217	1.4218	0.155084	NA
RNY4P16-201_282944	434.553	-0.705209	0.496334	-1.42084	0.155364	0.834869
RP11-752G15.5-002_70492	344.884	-0.472231	0.332462	-1.42041	0.155489	0.834869
RP11-694I15.3-001_326385	84.1615	-1.5649	1.10196	-1.42011	0.155577	0.834869
RNY4P10-201_211782	33.0219	2.06615	1.45595	1.41911	0.155867	0.834869
hsa-mir-106b_119634	86.6989	-1.26076	0.890738	-1.41542	0.156947	0.838661
hsa-let-7i_60043	10.6038	-1.81793	1.28577	-1.41389	0.157395	NA
hsa-let-7f-2_290723	38.3832	-0.495245	0.350808	-1.41173	0.15803	0.842453
hsa-mir-26b_254081	73.741	0.647094	0.4592	1.40918	0.158783	0.844472
hsa-mir-340_316545	19.3341	-1.57663	1.12143	-1.40592	0.159748	NA
hsa-mir-181a-2_59539	42.7182	-1.19545	0.850891	-1.40495	0.160038	0.849141
hsa_piR_017716|gb|DQ594453|Homo_sapiens_267354	28.5118	0.925204	0.65859	1.40483	0.160073	NA
hsa-mir-12136_153809	22.4667	2.01229	1.43528	1.40202	0.160909	NA
hsa_piR_016658|gb|DQ592931|Homo_sapiens_265442	54.3312	1.95439	1.39625	1.39975	0.161589	0.85475
hsa-mir-543_238522	45.871	-0.905603	0.647731	-1.39812	0.162078	0.85475
hsa-mir-222_340061	85.4643	2.0139	1.44097	1.3976	0.162232	0.85475
AC005263.8-002_239765	9.2134	1.87695	1.34707	1.39336	0.163511	NA
RP11-215L17.2-001_294643	52.8948	-1.09483	0.786514	-1.392	0.163922	0.861641
hsa-mir-101-1_145885	15.7893	1.50062	1.07839	1.39153	0.164063	NA
hsa-mir-320a_186451	66.5393	-1.65939	1.19405	-1.38971	0.164617	0.863282
hsa-mir-223_197400	26.8399	-0.584423	0.420884	-1.38856	0.164966	NA
hsa-let-7a-1_233712	21.7302	1.58456	1.14116	1.38855	0.164969	NA
hsa-mir-30d_44397	24.2347	-0.986907	0.711174	-1.38772	0.165224	NA
hsa-mir-199a-1_294225	58.6462	-1.05571	0.761163	-1.38697	0.165452	0.865646
ENST00000410794.1_236569	16.599	-2.09261	1.50947	-1.38632	0.16565	NA
hsa-mir-769_42828	19.1115	-1.41479	1.02104	-1.38564	0.165858	NA
ENST00000387372.1_188000	21.0752	-2.25611	1.62947	-1.38457	0.166184	NA
hsa-mir-363_105467	24.9024	1.17024	0.845959	1.38333	0.166564	NA
hsa-mir-30a_206712	39.1643	-1.11098	0.803587	-1.38253	0.166809	0.866
hsa-mir-3184_177888	72.2003	-1.01714	0.736404	-1.38123	0.16721	0.866
hsa-mir-337_1798	204.515	-1.11932	0.810852	-1.38042	0.167456	0.866
hsa-mir-10b_300404	108.518	0.63254	0.458389	1.37992	0.167612	0.866
hsa-mir-200c_82018	93.9121	-0.711105	0.515394	-1.37973	0.16767	0.866
RNY3-201_225597	57.7651	2.01135	1.45957	1.37804	0.168191	0.866
hsa-mir-379_62170	582.06	-0.954875	0.69295	-1.37799	0.168208	0.866
ENST00000387441.1_115383	151.017	2.06137	1.49843	1.37568	0.168919	0.867684
hsa-mir-409_336534	25.7146	-1.60127	1.16421	-1.37542	0.169002	NA
hsa-let-7b_222710	10.39	-1.07405	0.781617	-1.37414	0.169398	NA
ENST00000410794.1_307513	13.4242	1.35104	0.985081	1.37151	0.170217	NA
hsa-let-7i_266676	13.3855	-1.47741	1.07743	-1.37123	0.170305	NA
hsa-mir-144_98328	239.908	-0.827195	0.603606	-1.37042	0.170555	0.874095
hsa-mir-339_387678	57.6066	0.77012	0.562928	1.36806	0.171293	0.874287
hsa-mir-30c-2_54772	29.5492	-0.94511	0.690845	-1.36805	0.171297	NA
hsa-mir-660_43375	187.235	0.641503	0.469675	1.36584	0.171988	0.874287
hsa-mir-223_243506	6221.79	-0.390904	0.286293	-1.3654	0.172128	0.874287
hsa-mir-197_161450	762.132	-0.397098	0.291262	-1.36337	0.172765	0.874287
hsa-mir-328_94436	32.7318	-0.920703	0.676065	-1.36186	0.173244	0.874287
hsa-mir-24-2_357877	2505.89	-0.396479	0.29116	-1.36172	0.173286	0.874287
hsa-mir-324_265565	15.7988	0.901407	0.6624	1.36082	0.173571	NA
hsa-mir-486-2_307147	126.097	-0.749361	0.551307	-1.35924	0.174069	0.874287
RNY4P10-201_97844	205.799	2.38036	1.75272	1.3581	0.174432	0.874287
hsa-mir-4446_240100	40.9464	-1.00394	0.739593	-1.35742	0.174646	0.874287
hsa-mir-93_137706	115.777	0.453178	0.333987	1.35687	0.174822	0.874287
RNY4P16-201_229551	20.0875	-1.4523	1.07101	-1.35602	0.175094	NA
hsa-let-7a-1_250075	18.2352	-1.41585	1.04419	-1.35593	0.175123	NA
hsa-mir-493_346236	396.595	-1.00061	0.738366	-1.35517	0.175362	0.874287
hsa-mir-26a-2_5249	45.7616	-0.505424	0.373217	-1.35423	0.175662	0.874287
RNY3-201_263120	82.3449	1.98803	1.46985	1.35254	0.176202	0.874287
hsa-let-7g_252247	92.457	-0.745689	0.55137	-1.35243	0.176238	0.874287
hsa-mir-146a_258540	206.93	-0.491223	0.363359	-1.3519	0.176408	0.874287
hsa-mir-140_317708	28.0978	0.913639	0.676801	1.34994	0.177036	NA
hsa-mir-92a-1_261493	26.8764	-1.24486	0.92227	-1.34978	0.177087	NA
hsa-let-7b_328675	9518.68	0.548831	0.406621	1.34974	0.177101	0.875335
hsa-mir-24-2_169661	16.7602	-1.05445	0.781371	-1.34948	0.177181	NA
hsa-mir-486-2_73066	24.8813	1.04478	0.774577	1.34884	0.177388	NA
hsa-mir-22_251695	25.9455	1.29969	0.963676	1.34868	0.177439	NA
RNY4P7-201_36392	35.1739	-1.13987	0.845283	-1.34851	0.177495	0.875335
hsa-mir-10b_113391	70.9324	0.820664	0.608994	1.34757	0.177796	0.875335
hsa-mir-25_193357	34.3903	0.903521	0.671541	1.34544	0.178482	0.875335
RNY4-201_58801	84.8501	1.98681	1.47696	1.3452	0.17856	0.875335
hsa-mir-92a-1_255516	18.348	-1.65842	1.23299	-1.34504	0.178611	NA
hsa-mir-1249_96148	27.0291	-1.29433	0.963661	-1.34314	0.179227	NA
hsa-mir-181a-2_256758	14.1982	-1.20553	0.899529	-1.34018	0.180188	NA
RNY4P7-201_69432	129.009	2.05896	1.53801	1.33872	0.180663	0.881387
hsa-mir-15a_132948	93.1498	-0.786054	0.58774	-1.33742	0.181087	0.881387
hsa-let-7a-1_170849	35.9675	-0.503045	0.376383	-1.33653	0.181378	0.881387
hsa-let-7f-2_321301	42524.2	-0.487231	0.364613	-1.3363	0.181453	0.881387
hsa-mir-30d_283461	15580	-0.377754	0.283742	-1.33133	0.18308	0.881387
hsa-mir-3184_384283	44.9213	-1.64648	1.237	-1.33103	0.18318	0.881387
hsa-mir-140_122744	102.895	0.612335	0.460226	1.33051	0.183351	0.881387
hsa_piR_016658|gb|DQ592931|Homo_sapiens_355730	39.042	-1.15591	0.86968	-1.32913	0.183807	0.881387
hsa-mir-361_123477	22.2326	1.42774	1.07441	1.32886	0.183895	NA
hsa-mir-484_261064	25.8828	-0.676272	0.509119	-1.32832	0.184073	NA
RNY1-201_373291	57.2422	0.528393	0.397911	1.32792	0.184206	0.881387
hsa-mir-199a-1_246823	363.441	-0.538027	0.405206	-1.32779	0.184248	0.881387
hsa-mir-324_376540	12.6723	1.51566	1.14234	1.32681	0.184571	NA
hsa-mir-942_3568	94.6563	0.904023	0.682695	1.3242	0.185437	0.881387
hsa-mir-199a-1_309133	907.334	-0.470379	0.35597	-1.3214	0.186368	0.881387
hsa-mir-30d_356678	29.7651	-0.559436	0.424355	-1.31832	0.187397	0.881387
hsa-mir-186_114752	1339.69	-0.483355	0.366727	-1.31802	0.187496	0.881387
hsa-mir-223_190886	12.7849	-0.738783	0.560969	-1.31698	0.187847	NA
hsa-mir-30e_369968	124.018	0.774077	0.5883	1.31579	0.188246	0.881387
hsa-mir-382_249289	8.97757	-1.87753	1.42733	-1.31541	0.188372	NA
ENST00000387409.1_314432	66.215	-1.25294	0.952642	-1.31523	0.188433	0.881387
hsa-mir-320a_81431	9.53629	-1.14499	0.87091	-1.3147	0.188611	NA
hsa-let-7d_265944	27.4185	-1.26051	0.959868	-1.31321	0.189112	NA
hsa-mir-29c_209899	271.828	0.613586	0.467256	1.31317	0.189126	0.881387
hsa-mir-629_132800	17.3962	1.65153	1.25794	1.31289	0.189222	NA
hsa-mir-21_221815	20.0538	0.832283	0.634227	1.31228	0.189426	NA
hsa-mir-132_266196	20.699	-1.46728	1.12049	-1.30949	0.190367	NA
hsa-mir-146a_383110	39.5592	1.81042	1.38306	1.309	0.190535	0.881387
hsa-mir-151a_298040	151.074	-0.421321	0.322134	-1.30791	0.190905	0.881387
hsa-mir-335_62543	70.1659	-0.889122	0.680438	-1.30669	0.191318	0.881387
hsa-let-7c_25130	43.1147	-0.892263	0.683396	-1.30563	0.191678	0.881387
hsa-let-7f-2_298416	28.3343	-0.718756	0.550812	-1.3049	0.191926	NA
RNY4P10-201_140697	131.893	2.01918	1.54808	1.30432	0.192126	0.881387
hsa-mir-92a-1_103397	19.6533	0.775722	0.595027	1.30368	0.192344	NA
RNY4P23-201_358216	462.761	-0.862434	0.66162	-1.30352	0.192398	0.881387
hsa-mir-320a_314673	37.7791	-1.00635	0.772148	-1.30331	0.192469	0.881387
RNY1-201_226004	1807.5	2.26384	1.73724	1.30313	0.192532	0.881387
hsa-mir-223_297507	30.095	-0.882884	0.678355	-1.30151	0.193085	0.881387
hsa_piR_020326|gb|DQ597916|Homo_sapiens_267783	97.3776	-2.39522	1.84123	-1.30088	0.1933	0.881387
RNY4-201_688	74.6071	-1.15662	0.889494	-1.30031	0.193493	0.881387
hsa-mir-6511a-4_166495	49.6291	-0.973415	0.748784	-1.3	0.193603	0.881387
hsa-mir-425_2973	101.561	1.95878	1.50808	1.29885	0.193995	0.881387
RP11-846F4.3-001_113226	19.8118	-1.24038	0.955698	-1.29788	0.19433	NA
RP11-846F4.3-001_65578	666.755	-0.704869	0.543702	-1.29642	0.194829	0.881387
hsa-mir-185_333569	36.7421	1.37285	1.05921	1.29611	0.194939	0.881387
hsa-mir-361_277613	17.7629	-0.904341	0.697811	-1.29597	0.194986	NA
hsa-mir-425_345566	162.686	0.435938	0.336566	1.29525	0.195234	0.881387
hsa-mir-328_223924	25.3529	-0.940273	0.727757	-1.29201	0.196352	NA
hsa-mir-146b_293150	585.566	-0.467604	0.361964	-1.29185	0.196409	0.881387
RP11-846F4.3-001_302981	131.72	-0.579729	0.448946	-1.29131	0.196596	0.881387
hsa-let-7f-2_117550	2330.67	-0.502587	0.389596	-1.29002	0.197044	0.881387
hsa-mir-505_322378	129.164	-0.724136	0.561499	-1.28965	0.197173	0.881387
hsa-mir-25_117130	15.2945	1.1977	0.928871	1.28941	0.197254	NA
hsa-mir-421_119004	159.409	-0.438691	0.340258	-1.28929	0.197298	0.881387
RNY4P10-201_116497	165.414	2.00735	1.55881	1.28774	0.197835	0.881387
hsa-mir-199a-1_83010	246.871	-0.59799	0.464436	-1.28756	0.197899	0.881387
hsa-mir-21_129437	22464.2	-0.432023	0.335832	-1.28642	0.198295	0.881387
hsa-let-7a-3_382347	158.079	0.530803	0.412637	1.28637	0.198315	0.881387
hsa_piR_020326|gb|DQ597916|Homo_sapiens_29076	49.1581	-1.15665	0.899241	-1.28625	0.198357	0.881387
hsa-mir-92b_38655	22.4725	1.16335	0.90461	1.28602	0.198436	NA
hsa-let-7f-2_4260	30.5152	-0.614214	0.477625	-1.28598	0.198451	0.881387
hsa-let-7d_189652	5998.9	-0.541799	0.421347	-1.28587	0.198488	0.881387
hsa-mir-584_274588	21.3205	1.12675	0.87627	1.28585	0.198497	NA
hsa-mir-29a_99134	11.7708	1.12771	0.878223	1.28409	0.199112	NA
hsa-mir-487b_379702	77.3857	-1.08956	0.848856	-1.28356	0.199296	0.881387
RNY4P10-201_371910	67.763	1.91314	1.49075	1.28334	0.199372	0.881387
tRNA-Gly-GCC-1-5_354741	243.002	-2.67673	2.087	-1.28257	0.199642	0.881387
hsa-mir-21_35039	20.9152	-1.71271	1.33566	-1.28229	0.19974	NA
hsa-mir-766_145862	107.763	-0.638449	0.49827	-1.28133	0.200077	0.881387
hsa-mir-361_17298	479.806	-0.447161	0.349025	-1.28117	0.200134	0.881387
RP11-184I16.1-001_128082	29.5022	-1.47072	1.14848	-1.28059	0.200339	NA
hsa-mir-425_48705	6927.55	0.287423	0.224605	1.27968	0.200657	0.881387
hsa-mir-151a_39802	195.607	0.644136	0.50344	1.27947	0.200732	0.881387
hsa-mir-381_297718	148.267	-1.10709	0.865892	-1.27855	0.201054	0.881387
hsa-mir-92a-1_212023	62.415	0.538016	0.421009	1.27792	0.201277	0.881387
hsa-mir-26b_190519	415.693	0.579922	0.453816	1.27788	0.201292	0.881387
RNY4P10-201_297365	62.901	1.84957	1.45036	1.27525	0.202221	0.882605
hsa-mir-23a_196572	194.596	0.47129	0.369675	1.27488	0.202353	0.882605
hsa-mir-4433a_317960	32.7573	-1.7794	1.39783	-1.27298	0.203025	0.882985
hsa-mir-128-1_103537	14.4413	-1.11114	0.873086	-1.27266	0.203139	NA
tRNA-Glu-TTC-2-2_353366	71.6361	1.79978	1.41445	1.27242	0.203224	0.882985
hsa-mir-151a_341589	29.1975	-0.806216	0.634305	-1.27102	0.203721	NA
hsa-mir-484_253213	1260.71	-0.340749	0.268155	-1.27071	0.20383	0.883919
hsa_piR_020009|gb|DQ597484|Homo_sapiens_153774	112.669	-0.603039	0.475331	-1.26867	0.204558	0.885007
ENST00000459091.1_233604	25.2864	-1.10208	0.869074	-1.26811	0.20476	NA
hsa-mir-486-2_329588	85.6407	1.02779	0.810684	1.26781	0.204866	0.885007
hsa-mir-29a_350967	71.1604	0.689028	0.544066	1.26644	0.205355	0.885422
hsa-mir-409_54654	325.215	-0.873387	0.691378	-1.26325	0.206498	0.888649
hsa-mir-10527_139311	11.2215	-1.20535	0.95418	-1.26323	0.206506	NA
hsa-mir-941-5_346703	15.0888	1.41551	1.12231	1.26124	0.207221	NA
hsa-mir-339_285870	19.1863	-1.22805	0.974826	-1.25976	0.207756	NA
tRNA-Gly-CCC-1-1_224496	17.7839	2.12662	1.68832	1.25961	0.20781	NA
hsa-mir-155_29885	13.7331	-0.88368	0.701574	-1.25957	0.207825	NA
hsa-mir-103b-1_156198	45.1679	-1.0468	0.831214	-1.25936	0.207899	0.892977
hsa-mir-146a_303130	14.705	-1.39498	1.10875	-1.25816	0.208335	NA
hsa-mir-92a-1_206190	985.909	0.479119	0.38091	1.25783	0.208455	0.893461
hsa-mir-142_39983	491.177	-0.485071	0.386049	-1.2565	0.208934	0.893461
hsa-mir-4433a_16147	55.2394	-1.67955	1.3388	-1.25452	0.209654	0.893461
hsa-mir-103b-1_308939	377.597	0.588236	0.469345	1.25331	0.210092	0.893461
hsa-mir-130a_13434	86.2031	-0.609461	0.486546	-1.25263	0.210342	0.893461
hsa-mir-223_265602	60.901	-0.790805	0.631812	-1.25165	0.210699	0.893461
hsa-mir-654_302105	146.666	-1.12323	0.899248	-1.24908	0.211637	0.893461
RP11-846F4.3-001_278470	105.377	-0.734772	0.588414	-1.24873	0.211762	0.893461
hsa-mir-6511b-2_341682	27.7094	0.53927	0.431968	1.2484	0.211884	NA
hsa_piR_020326|gb|DQ597916|Homo_sapiens_243686	9.9723	-1.25482	1.00535	-1.24814	0.211979	NA
hsa-mir-25_63835	31.4169	-0.891096	0.714348	-1.24743	0.212241	0.893461
hsa-mir-486-2_386450	117.531	0.66619	0.534182	1.24712	0.212353	0.893461
RNY4P23-201_292258	65.8797	0.883611	0.709765	1.24493	0.213156	0.893461
hsa-mir-4433a_119167	58.8637	-0.77186	0.621158	-1.24261	0.21401	0.893461
RNY4P7-201_163622	144.126	1.93928	1.56168	1.24179	0.214315	0.893461
hsa-mir-125a_39152	897.902	0.398233	0.320915	1.24093	0.214632	0.893461
hsa-mir-628_308985	13.3796	1.24206	1.00176	1.23989	0.215018	NA
hsa_piR_016659|gb|DQ592932|Homo_sapiens_29462	53.1197	-0.644303	0.519658	-1.23986	0.215027	0.893461
hsa-mir-25_117257	15.4407	1.16838	0.942545	1.2396	0.215123	NA
hsa-mir-340_353495	372.29	-0.665844	0.537228	-1.23941	0.215195	0.893461
RNY4P7-201_237422	75.6983	1.81757	1.4672	1.2388	0.215419	0.893461
hsa-mir-340_9282	54.504	-0.975713	0.787941	-1.23831	0.215602	0.893461
hsa-mir-486-2_67372	73.9832	0.909146	0.734947	1.23702	0.216078	0.893461
RNY4P23-201_118422	187.083	-0.571124	0.461821	-1.23668	0.216206	0.893461
hsa-mir-378a_125774	482.46	0.529975	0.428665	1.23634	0.216332	0.893461
hsa-mir-486-2_104919	10.5129	0.667096	0.540173	1.23497	0.216842	NA
hsa-mir-130b_55334	12.286	1.34912	1.09259	1.23479	0.216908	NA
hsa-mir-874_329554	11.9288	1.27868	1.03562	1.23471	0.21694	NA
hsa-mir-223_119217	50.3785	0.457297	0.370674	1.23369	0.217318	0.89588
hsa-mir-345_175733	81.2404	0.872504	0.707838	1.23263	0.217713	0.89588
ENST00000390880.2_125502	84.4888	-0.553906	0.451596	-1.22655	0.219991	0.903606
hsa-mir-4772_66180	27.3948	-1.0176	0.830116	-1.22585	0.220254	NA
hsa-mir-195_3764	18.4179	0.803195	0.655507	1.2253	0.220461	NA
tRNA-Gly-GCC-3-1_43755	15.3293	1.13291	0.925192	1.22451	0.220761	NA
hsa-mir-23a_173260	22.8368	1.241	1.01438	1.2234	0.221177	NA
RP11-177A2.2-001_67170	9.75093	1.25723	1.02787	1.22315	0.221275	NA
hsa-mir-10b_103516	1316.86	0.648491	0.530281	1.22292	0.22136	0.907577
hsa-mir-92a-1_360443	2667.67	-0.531629	0.436084	-1.2191	0.222807	0.90768
RNY4P10-201_374647	458.71	-0.718106	0.589194	-1.21879	0.222923	0.90768
hsa-mir-98_316343	3185.16	-0.538951	0.442466	-1.21806	0.2232	0.90768
RP11-846F4.3-001_370470	36.6787	-1.14708	0.942008	-1.2177	0.223337	0.90768
hsa-mir-4433a_201672	49.6621	-2.39636	1.96819	-1.21754	0.223398	0.90768
hsa-mir-324_147235	27.2372	-0.426306	0.350348	-1.21681	0.223678	NA
ENST00000387441.1_351126	21.5037	2.1105	1.7353	1.21621	0.223904	NA
hsa-let-7d_351699	834.611	-0.695991	0.572759	-1.21516	0.224307	0.909734
RNY4P10-201_220469	153.787	0.494177	0.407578	1.21247	0.225331	0.910725
hsa-mir-487b_54746	75.007	-0.855685	0.705777	-1.2124	0.225359	0.910725
hsa-let-7e_213643	214.313	-0.324722	0.26899	-1.20719	0.22736	0.912689
hsa-mir-103a-1_385274	57.8147	-0.525152	0.435274	-1.20648	0.227631	0.912689
hsa-mir-320a_194039	20.5269	1.10277	0.914167	1.20632	0.227696	NA
hsa-mir-16-1_338265	18.2528	1.37676	1.14187	1.20571	0.227931	NA
hsa-mir-451b_70557	25.178	-2.15731	1.7905	-1.20487	0.228254	NA
RNY4P16-201_63661	204.892	-0.749691	0.62329	-1.2028	0.229055	0.912689
hsa-mir-32_231011	75.3895	1.08965	0.906153	1.2025	0.22917	0.912689
tRNA-Glu-CTC-1-7_266805	30.8408	1.66442	1.3862	1.20071	0.229865	0.912689
hsa-let-7d_25116	423.144	0.860614	0.716897	1.20047	0.229956	0.912689
tRNA-Leu-TAG-1-1_351047	239.498	0.690994	0.575883	1.19989	0.230184	0.912689
RNY4P28-201_275842	74.135	1.80196	1.50264	1.1992	0.230452	0.912689
hsa-mir-127_7702	73.1556	-0.982295	0.819392	-1.19881	0.230602	0.912689
hsa-mir-140_194149	44.1892	1.16377	0.970817	1.19875	0.230625	0.912689
hsa-mir-374a_253183	104.523	-1.03235	0.861273	-1.19863	0.230672	0.912689
RNY4P10-201_84308	185.61	2.05568	1.71514	1.19855	0.230702	0.912689
hsa-mir-181a-2_123624	12.9988	1.22231	1.02025	1.19805	0.230896	NA
hsa-mir-548k_77185	29.5585	-0.784787	0.65521	-1.19776	0.231009	NA
hsa-mir-12136_314764	21.4204	1.78527	1.49155	1.19692	0.231336	NA
hsa-let-7a-1_41176	13.5813	-1.52972	1.28191	-1.19331	0.232748	NA
hsa-mir-144_175086	93.5957	-1.40099	1.17619	-1.19113	0.233603	0.920784
hsa-mir-186_294232	11.5551	-1.24687	1.0477	-1.19011	0.234005	NA
hsa-mir-431_86737	409.951	-0.80173	0.673877	-1.18973	0.234154	0.920784
hsa-let-7b_346371	15.9232	-1.52187	1.27931	-1.1896	0.234203	NA
RP11-846F4.3-001_383667	397.772	-0.738138	0.620683	-1.18924	0.234347	0.920784
hsa-mir-27b_132733	53.397	0.592091	0.497912	1.18915	0.234381	0.920784
tRNA-Glu-CTC-1-7_60112	10.2524	0.988293	0.831763	1.18819	0.234758	NA
hsa-mir-103b-1_98789	407.178	-0.71465	0.601811	-1.1875	0.235031	0.921731
hsa-mir-21_106184	25.9722	-0.446107	0.375794	-1.18711	0.235186	NA
hsa-let-7a-3_37445	47.326	-0.69538	0.586394	-1.18586	0.235679	0.922366
hsa-mir-409_276576	184.298	-0.822357	0.693963	-1.18502	0.236011	0.922366
hsa-mir-320c-1_170897	24.2337	-1.3536	1.14288	-1.18437	0.236266	NA
tRNA-Glu-TTC-1-2_225755	13.1588	1.34594	1.13665	1.18413	0.236362	NA
hsa-let-7b_130777	9.16107	0.650831	0.54985	1.18365	0.236551	NA
hsa-mir-769_4906	61.3776	-0.587014	0.496216	-1.18298	0.236816	0.923911
hsa-let-7f-2_76485	40.9511	-0.826312	0.699536	-1.18123	0.237512	0.925024
RNY4P16-201_16993	19.5681	-1.52905	1.29524	-1.18051	0.237797	NA
hsa-mir-12136_217774	28.8649	1.82389	1.54774	1.17842	0.238631	NA
hsa-mir-26a-2_388644	52.3636	-0.859883	0.731166	-1.17604	0.239578	0.931461
hsa-mir-21_369611	28.6645	-1.41278	1.20326	-1.17413	0.240345	NA
RNY3P2-201_327755	23.2513	-1.42224	1.21267	-1.17281	0.240872	NA
hsa-mir-505_85443	17.7152	-0.955908	0.815646	-1.17196	0.241211	NA
hsa-mir-190a_128649	21.9407	-1.20451	1.02869	-1.17092	0.24163	NA
hsa-let-7f-2_383755	30.2064	-0.488202	0.417104	-1.17046	0.241817	0.936778
hsa-mir-26a-2_126919	68.0481	-0.423275	0.361663	-1.17036	0.241857	0.936778
hsa-mir-486-2_108531	10.1756	1.24816	1.06672	1.17009	0.241966	NA
hsa-mir-320a_263607	16.1999	1.02999	0.880992	1.16913	0.242351	NA
hsa-mir-25_217382	28.7342	-1.1484	0.982326	-1.16906	0.242381	NA
hsa-mir-340_147890	13.5415	1.02205	0.875135	1.16788	0.242856	NA
RNY3P2-201_299682	94.7879	-0.845269	0.724125	-1.1673	0.243091	0.936778
hsa-let-7g_98120	29.7837	-0.495718	0.424948	-1.16654	0.243397	0.936778
hsa-mir-486-2_174446	37.4897	-1.17231	1.00518	-1.16626	0.243509	0.936778
hsa-mir-92b_14892	32.5677	0.789127	0.676971	1.16567	0.243746	0.936778
hsa-mir-98_100994	113.059	0.6539	0.56109	1.16541	0.243853	0.936778
hsa-mir-181a-1_284959	13.9295	-1.12227	0.963101	-1.16527	0.243911	NA
ENST00000389680.2_389160	12.4301	1.11956	0.960828	1.1652	0.243937	NA
tRNA-Glu-TTC-14-1_97062	23.7853	1.51346	1.29894	1.16515	0.243957	NA
RNY4-201_337516	18.7354	-1.36836	1.17603	-1.16354	0.244609	NA
hsa-mir-3184_59600	130.063	-0.924272	0.794864	-1.16281	0.244908	0.939232
hsa-mir-664a_206739	15.8465	0.889911	0.766135	1.16156	0.245415	NA
ENST00000631292.1_214322	10.6949	1.66441	1.43529	1.15964	0.246197	NA
hsa-mir-16-1_313608	80.9393	0.653626	0.563653	1.15962	0.246202	0.940082
hsa-mir-151a_72807	57.1496	-0.558635	0.481785	-1.15951	0.246248	0.940082
hsa-mir-5010_291913	15.3122	0.980736	0.846342	1.15879	0.24654	NA
hsa-mir-106b_31535	298.106	-0.540436	0.46638	-1.15879	0.246543	0.940082
tRNA-Val-CAC-3-1_66062	66.65	1.59025	1.37308	1.15816	0.246797	0.940082
hsa-mir-941-5_265550	22.9524	0.982759	0.849456	1.15693	0.247302	NA
ENST00000631292.1_388901	16.6152	1.07495	0.93	1.15586	0.247739	NA
hsa_piR_016658|gb|DQ592931|Homo_sapiens_18870	25.5608	-1.45577	1.26175	-1.15378	0.248592	NA
hsa-mir-487b_172009	650.44	-0.815131	0.706961	-1.15301	0.248907	0.945457
hsa-mir-221_375633	30.4656	0.583688	0.506569	1.15224	0.249223	0.945457
SMC1A-202_275705	25.0172	1.52082	1.32045	1.15175	0.249425	NA
hsa-mir-126_182124	15.2146	-0.428861	0.372381	-1.15167	0.249456	NA
hsa-mir-320a_317470	35.0747	-1.19146	1.03457	-1.15165	0.249467	0.945457
hsa-mir-505_257179	18.4857	-1.27879	1.11069	-1.15134	0.249591	NA
tRNA-Gly-CCC-2-2_338638	13.5159	1.29552	1.12638	1.15017	0.250075	NA
AC005263.8-002_230222	111.548	0.368623	0.321141	1.14785	0.251029	0.948596
hsa-mir-181b-2_14972	30.6686	0.96699	0.842893	1.14723	0.251288	0.948596
RNY4-201_321880	17.5919	1.89934	1.65763	1.14581	0.251872	NA
hsa-mir-192_350274	31.5806	-1.09702	0.957569	-1.14563	0.251948	0.948596
hsa-mir-24-2_89954	86.4778	-0.599932	0.523771	-1.14541	0.25204	0.948596
hsa-mir-103b-1_195904	35.4241	1.42726	1.24701	1.14454	0.252398	0.948596
hsa-mir-320a_161578	583.737	-0.732504	0.641296	-1.14222	0.253361	0.949042
hsa-mir-26b_200310	19.9773	-0.601977	0.527085	-1.14209	0.253418	NA
hsa_piR_004309|gb|DQ575884|Homo_sapiens_32351	50.801	1.88532	1.65171	1.14144	0.253688	0.949042
hsa-mir-151a_204748	55.1387	-0.454687	0.398772	-1.14022	0.254195	0.949042
hsa-mir-28_173944	60.3858	0.555293	0.487011	1.14021	0.2542	0.949042
tRNA-Pro-TGG-1-1_371526	16.4673	-1.06437	0.934837	-1.13856	0.254888	NA
hsa-mir-320a_218042	130.19	-0.986463	0.867943	-1.13655	0.255725	0.95052
hsa-mir-126_385000	15.1173	-1.20952	1.06448	-1.13625	0.255851	NA
hsa-mir-22_309163	3835.19	0.413328	0.363854	1.13597	0.255968	0.95052
hsa-mir-4446_249885	65.8204	-1.0278	0.905107	-1.13556	0.256141	0.95052
hsa-mir-146a_336207	2131.32	-0.475468	0.418833	-1.13522	0.256282	0.95052
RNY4P7-201_133644	14.7036	1.41895	1.25053	1.13468	0.256511	NA
hsa-mir-29a_64735	21.0048	0.920927	0.815132	1.12979	0.258566	NA
hsa-mir-486-2_260579	13.1664	1.30723	1.15758	1.12929	0.258778	NA
hsa-mir-4433a_53236	18.0523	-1.35386	1.19925	-1.12892	0.258932	NA
hsa-mir-181a-2_180913	8.93155	-1.04041	0.921983	-1.12845	0.259129	NA
hsa-mir-3184_16756	425.456	-0.296392	0.262683	-1.12833	0.259182	0.959531
hsa-mir-92b_353015	127.223	-0.54439	0.483138	-1.12678	0.259836	0.959531
ENST00000445125.2_362594	80.1592	-1.40781	1.24981	-1.12642	0.259988	0.959531
hsa-mir-223_144033	13.0144	-0.573383	0.509042	-1.1264	0.259997	NA
hsa-mir-486-2_236747	25419.6	0.480931	0.427859	1.12404	0.260996	0.960686
hsa-mir-432_168869	818.529	-0.806458	0.7177	-1.12367	0.261153	0.960686
hsa-mir-106b_97144	21.505	0.94731	0.844528	1.1217	0.261989	NA
hsa-mir-10a_220412	16.075	-1.1698	1.04327	-1.12128	0.262167	NA
hsa-mir-24-2_307050	40.4382	0.572789	0.511076	1.12075	0.262393	0.962653
RP11-849F2.1-001_182592	102.296	-0.576329	0.51472	-1.11969	0.262844	0.962653
hsa-mir-146b_168735	33.5308	-0.705587	0.630325	-1.1194	0.262969	0.962653
hsa-mir-23a_81573	64.7277	0.800761	0.716907	1.11697	0.264008	0.962893
hsa-mir-550b-2_244855	15.0191	1.51116	1.35464	1.11555	0.264617	NA
hsa-mir-4433a_268823	103.788	-1.49822	1.34561	-1.11341	0.265531	0.962893
hsa-mir-409_216302	18.9992	-0.998386	0.898173	-1.11157	0.266321	NA
hsa-let-7f-2_154426	72.2428	-0.477075	0.430033	-1.10939	0.26726	0.962893
hsa-mir-133a-2_206057	31.2801	-1.03141	0.93005	-1.10898	0.267438	0.962893
hsa-mir-20b_167190	77.5334	0.490497	0.442343	1.10886	0.26749	0.962893
hsa-mir-30e_242937	695.796	-0.50894	0.459053	-1.10867	0.267571	0.962893
RNY4P23-201_300108	210.73	0.62256	0.561775	1.1082	0.267774	0.962893
hsa-mir-92a-1_126392	18.7311	0.672965	0.607597	1.10758	0.268041	NA
RNY4-201_296672	183.249	-0.441086	0.398983	-1.10553	0.268932	0.962893
hsa-mir-126_365762	48.3745	-0.495562	0.448352	-1.1053	0.269031	0.962893
hsa-mir-17_151956	85.8371	-0.577595	0.522647	-1.10513	0.269102	0.962893
hsa-mir-3615_193389	24.3916	1.01354	0.917487	1.10469	0.269292	NA
hsa-mir-15b_310857	1500.5	-0.354874	0.321243	-1.10469	0.269293	0.962893
hsa-mir-26a-2_370766	74.0612	-0.517705	0.468834	-1.10424	0.269489	0.962893
hsa-mir-223_169147	15.2203	1.04335	0.945039	1.10403	0.26958	NA
hsa-mir-140_246794	21.9054	-1.22706	1.11184	-1.10364	0.269751	NA
hsa-mir-10a_360093	50.6762	0.488035	0.443017	1.10162	0.270628	0.962893
hsa-mir-16-2_261129	30.2362	1.12885	1.02558	1.1007	0.271026	0.962893
hsa-mir-199a-1_132847	94.0764	-0.506601	0.461054	-1.09879	0.27186	0.962893
RP11-645N11.2-002_5102	20.2502	1.08936	0.991582	1.09861	0.27194	NA
hsa-mir-320a_23159	34.0614	-0.794302	0.723161	-1.09838	0.27204	0.962893
RNY4-201_51314	35.7369	-1.6613	1.51327	-1.09783	0.27228	0.962893
hsa-mir-320a_151590	516.787	-0.765808	0.698072	-1.09703	0.272627	0.962893
RNY4P16-201_38229	445.017	-0.455606	0.415797	-1.09574	0.273192	0.962893
hsa-mir-382_142810	66.526	-1.12539	1.0276	-1.09517	0.273442	0.962893
hsa-mir-425_84590	80.6837	-0.701626	0.640761	-1.09499	0.273521	0.962893
hsa-mir-320a_133469	57.5926	1.59195	1.45399	1.09489	0.273566	0.962893
ENST00000631292.1_241831	94.3586	0.58883	0.537908	1.09467	0.273663	0.962893
hsa-mir-221_386067	14.8797	1.11268	1.01712	1.09396	0.273975	NA
hsa-mir-378a_27695	1371.31	0.455581	0.416521	1.09378	0.274053	0.962893
hsa-mir-182_63019	152.337	0.867537	0.793976	1.09265	0.274548	0.962893
hsa-mir-125b-1_131790	189.298	0.453661	0.415544	1.09173	0.274953	0.962893
hsa-mir-195_342952	39.5005	0.479249	0.43929	1.09096	0.275289	0.962893
RNY4P7-201_183755	245.117	1.7106	1.56832	1.09072	0.275394	0.962893
RP11-846F4.3-001_378044	48.1976	-0.791225	0.725447	-1.09067	0.275417	0.962893
MT-CO2-201_311323	44.6181	0.930108	0.854599	1.08836	0.276438	0.964685
hsa-mir-625_326249	20.3132	-1.34868	1.23955	-1.08804	0.276576	NA
RNY4P10-201_263593	60.4074	1.60589	1.47659	1.08757	0.276785	0.964685
hsa-mir-101-1_387423	10.4041	1.00905	0.92844	1.08682	0.277117	NA
hsa-mir-320a_113874	3171.68	0.694373	0.639125	1.08644	0.277283	0.96488
hsa-let-7f-2_114556	100.482	-0.74893	0.689936	-1.08551	0.277697	0.96488
hsa-mir-140_96810	187.374	0.398383	0.367845	1.08302	0.2788	0.966778
hsa-mir-877_170840	28.7804	-1.0099	0.933075	-1.08234	0.279103	NA
hsa-mir-1307_40231	40.1207	0.614238	0.567969	1.08146	0.279491	0.966778
hsa-let-7i_106014	125.505	0.341805	0.316112	1.08128	0.279574	0.966778
hsa-mir-133a-2_267525	51.5789	-1.16909	1.08208	-1.08041	0.279958	0.966778
hsa-mir-223_212919	3717.69	-0.33678	0.312142	-1.07893	0.280619	0.967578
hsa-mir-26a-2_265379	24.8416	0.773873	0.717529	1.07852	0.2808	NA
hsa-let-7f-2_281870	7.29627	-0.816206	0.756826	-1.07846	0.280828	NA
ENST00000464816.1_278137	24.4657	-1.29768	1.20382	-1.07797	0.281045	NA
hsa-mir-1306_139212	85.2487	-0.425657	0.394933	-1.0778	0.281125	0.967843
AL135747.3-003_47627	21.5421	-0.770137	0.715693	-1.07607	0.281895	NA
hsa-mir-24-2_131159	34.9365	0.584993	0.543702	1.07594	0.281953	0.968291
tRNA-Val-CAC-6-1_22000	21.6716	-0.950597	0.884315	-1.07495	0.282396	NA
hsa-let-7g_252420	16150.4	-0.399088	0.371296	-1.07485	0.282441	0.968291
hsa-mir-25_149586	19.1107	0.830503	0.774582	1.07219	0.283633	NA
hsa-mir-30c-2_158525	4593.46	-0.443885	0.414295	-1.07142	0.283979	0.968291
hsa-mir-21_34569	19.3763	-0.531658	0.496311	-1.07122	0.28407	NA
hsa-mir-125a_103710	921.396	0.384408	0.359089	1.07051	0.28439	0.968291
hsa-mir-3184_161589	28.2889	0.658576	0.616166	1.06883	0.285147	NA
hsa-mir-26a-2_12921	44159.1	-0.338482	0.316782	-1.0685	0.285294	0.968291
RP11-846F4.3-001_108561	96.0663	-0.72716	0.681397	-1.06716	0.285899	0.968291
hsa-mir-15b_123295	59.1442	0.619456	0.58057	1.06698	0.285981	0.968291
hsa-mir-146b_62721	71.2162	-0.833198	0.780916	-1.06695	0.285995	0.968291
hsa-mir-532_25486	64.0952	-0.747524	0.701053	-1.06629	0.286294	0.968291
hsa-mir-92a-1_389272	12.5361	-1.15212	1.08061	-1.06617	0.286346	NA
hsa-mir-101-1_354021	36.7833	-0.832759	0.781399	-1.06573	0.286546	0.968291
RNY4-201_348771	31.9802	1.45985	1.37051	1.06519	0.28679	0.968291
hsa-mir-17_386691	763.834	-0.274306	0.257813	-1.06397	0.287341	0.968291
hsa-mir-99b_125450	494.017	0.409407	0.385108	1.0631	0.287738	0.968291
RNY4-201_167539	75.0117	1.67454	1.5768	1.06199	0.28824	0.968291
hsa-mir-128-1_74369	46.4423	-0.668357	0.629985	-1.06091	0.288731	0.968291
RNY4P20-201_269039	13.9638	-1.18123	1.11472	-1.05967	0.289296	NA
tRNA-Gly-CCC-1-1_16018	56.8434	1.62201	1.5314	1.05917	0.289523	0.968291
hsa-let-7f-2_366267	16.0997	0.74817	0.706454	1.05905	0.289577	NA
RNY4-201_379762	28.5554	-0.762072	0.719699	-1.05888	0.289656	NA
hsa-mir-4286_383540	7.69094	1.14594	1.08368	1.05745	0.290307	NA
hsa-mir-1301_149058	13.9919	0.887634	0.840448	1.05614	0.290903	NA
RNY4P6-201_381130	24.7963	-1.23444	1.16898	-1.056	0.29097	NA
hsa-mir-28_196447	49.8496	-0.750843	0.711112	-1.05587	0.291026	0.968291
hsa-mir-25_262760	20.8004	0.776186	0.736863	1.05337	0.292173	NA
hsa-mir-320a_377219	2871.11	-0.563391	0.534902	-1.05326	0.292222	0.968291
hsa-mir-486-2_327529	242.98	-0.43909	0.41704	-1.05287	0.292399	0.968291
RNY4P10-201_379024	37.9395	-1.60757	1.52804	-1.05205	0.292779	0.968291
hsa-let-7b_68877	26.7427	1.09497	1.04113	1.05171	0.292935	NA
ENST00000387347.2_249777	23.0397	-1.3259	1.26087	-1.05157	0.292995	NA
RNY4P27-201_190269	248.516	1.62312	1.5444	1.05097	0.293271	0.968291
hsa-mir-199a-1_318521	3624.05	-0.437958	0.416808	-1.05074	0.293377	0.968291
hsa-mir-197_25332	9.20817	-1.04244	0.992237	-1.0506	0.293445	NA
hsa-mir-1307_289649	396.976	-0.47238	0.449733	-1.05036	0.293554	0.968291
hsa-mir-10399_128854	32.2221	-0.442595	0.421533	-1.04996	0.293734	0.968291
hsa-mir-30b_343240	13.4756	-1.16695	1.11197	-1.04945	0.293973	NA
hsa-mir-92a-1_70633	46.9385	-0.514844	0.49115	-1.04824	0.294527	0.968291
hsa-let-7i_153894	2051.95	0.431023	0.411416	1.04766	0.294796	0.968291
hsa-mir-26a-2_231466	818.727	-0.451245	0.431065	-1.04681	0.295185	0.968291
hsa-mir-30c-2_49339	11.952	-1.0898	1.04115	-1.04672	0.295229	NA
RNY4P23-201_69062	21.3676	-1.14289	1.09203	-1.04657	0.295298	NA
hsa-let-7i_66086	90.4896	-0.601887	0.575396	-1.04604	0.295542	0.968291
hsa-mir-369_60692	28.4649	-0.988587	0.945872	-1.04516	0.295949	NA
RNY4P23-201_198416	280.072	-0.571339	0.546784	-1.04491	0.296066	0.968291
hsa-mir-664a_16640	39.4901	-0.877088	0.8398	-1.0444	0.2963	0.968291
hsa-mir-93_228311	26.4235	0.811717	0.777352	1.04421	0.29639	NA
hsa-mir-487b_370495	21.263	-1.51767	1.45409	-1.04372	0.296613	NA
hsa-mir-409_50698	30.9484	-1.01481	0.972704	-1.04329	0.296816	0.968291
hsa-mir-340_238362	120.208	-0.597094	0.572584	-1.04281	0.297038	0.968291
hsa-let-7g_324881	15.5857	0.864608	0.829278	1.0426	0.297132	NA
hsa-mir-505_101149	81.3226	-0.402418	0.386009	-1.04251	0.297176	0.968291
hsa-mir-361_132694	309.219	-0.412273	0.395651	-1.04201	0.297407	0.968291
hsa-mir-186_235385	55.0914	0.498513	0.478494	1.04184	0.297487	0.968291
hsa-mir-126_45281	444.893	-0.259484	0.249091	-1.04172	0.297539	0.968291
hsa-mir-146a_79960	9268.28	-0.419255	0.402665	-1.0412	0.297782	0.968291
hsa-mir-151a_89732	61.7082	-0.487621	0.468493	-1.04083	0.297956	0.968291
tRNA-Lys-CTT-1-2_96818	10.2591	1.17946	1.13384	1.04023	0.298232	NA
tRNA-Gly-TCC-1-1_189681	20.7251	-0.942804	0.906351	-1.04022	0.298238	NA
RP11-846F4.3-001_3599	11.2595	0.668858	0.643076	1.04009	0.298298	NA
CTB-54O9.4-003_349026	14.9827	0.905767	0.871305	1.03955	0.298548	NA
ENST00000516950.1_212769	75.0688	1.50708	1.45068	1.03888	0.298861	0.968291
hsa-let-7g_133155	12.9361	0.770213	0.74162	1.03855	0.299012	NA
RNY4P10-201_384817	197.094	1.71836	1.6553	1.03809	0.299227	0.968291
hsa-mir-142_330633	1119.85	-0.355056	0.342049	-1.03803	0.299257	0.968291
hsa-mir-140_38632	49.5036	0.615905	0.593591	1.03759	0.299461	0.968291
hsa-mir-199a-1_18907	15.4451	-0.975342	0.94049	-1.03706	0.299709	NA
hsa-mir-15b_150915	1356.9	-0.406135	0.391631	-1.03704	0.299719	0.968291
hsa-mir-222_230701	33.8717	1.20089	1.15934	1.03583	0.30028	0.968431
hsa-let-7e_138736	103.918	-0.445174	0.43014	-1.03495	0.300692	0.968431
hsa-mir-146b_324259	38.3411	-0.528927	0.511444	-1.03418	0.301051	0.968431
hsa-mir-451b_76539	13.852	0.919294	0.890797	1.03199	0.302077	NA
hsa-mir-324_274091	21.8049	1.13633	1.10128	1.03182	0.302156	NA
RNY4-201_128527	31.908	1.46829	1.42622	1.02949	0.303247	0.972962
hsa-mir-92a-1_340618	17.8039	1.07347	1.04419	1.02804	0.303929	NA
ENST00000387377.1_167378	28.3458	1.4128	1.37433	1.02799	0.303955	NA
ENST00000364596.1_333674	10.4121	-1.13128	1.10127	-1.02725	0.304302	NA
hsa-mir-221_223399	564.894	0.417876	0.40749	1.02549	0.305134	0.972962
hsa-let-7g_351822	24.8396	-0.840212	0.819527	-1.02524	0.30525	NA
hsa-let-7f-2_225818	58.4759	-0.566077	0.552775	-1.02406	0.305805	0.972962
RP11-227B21.1-001_11953	18.0119	1.36491	1.33321	1.02377	0.305942	NA
hsa-mir-19b-2_81413	670.628	-0.357704	0.349422	-1.0237	0.305976	0.972962
hsa-mir-26a-2_70181	113.203	-0.633917	0.619522	-1.02324	0.306196	0.972962
hsa-mir-30e_344085	258.787	0.284713	0.278459	1.02246	0.306564	0.972962
hsa-mir-99a_351109	55.7674	0.365699	0.357754	1.02221	0.306682	0.972962
hsa-mir-12136_58251	440.693	1.62612	1.59235	1.0212	0.307158	0.972962
RNY4P7-201_103854	59.2684	1.52159	1.49005	1.02117	0.307174	0.972962
hsa-mir-93_260900	166.317	-0.329761	0.323065	-1.02073	0.307383	0.972962
ENST00000362330.2_308024	36.7649	1.44373	1.41514	1.0202	0.307632	0.972962
hsa-mir-223_158608	1532.45	-0.330958	0.324567	-1.01969	0.307875	0.972962
hsa-mir-32_4942	19.2677	0.828011	0.813428	1.01793	0.308713	NA
hsa-mir-320a_109808	214.612	-0.509841	0.500999	-1.01765	0.308845	0.972962
hsa-mir-486-2_302945	20.5824	0.939663	0.923543	1.01745	0.308937	NA
hsa-mir-186_102312	32.4871	0.846298	0.832323	1.01679	0.309253	0.972962
ENST00000365241.1_326216	53.3664	2.00294	1.97234	1.01552	0.309859	0.972962
RP11-727F15.8-001_184826	15.2015	1.01744	1.0022	1.01521	0.310007	NA
hsa-mir-320a_99290	59.1918	-0.548009	0.539868	-1.01508	0.310068	0.972962
tRNA-Glu-CTC-1-1_154090	171.671	1.54058	1.51776	1.01504	0.310089	0.972962
hsa-mir-15b_43976	14.77	1.03605	1.02078	1.01497	0.310122	NA
hsa-let-7b_285339	34.5742	0.274818	0.270824	1.01475	0.310226	0.972962
RNY4P10-201_364898	20.6178	1.3066	1.28834	1.01418	0.310498	NA
hsa-let-7d_176007	29.8333	-0.865909	0.854714	-1.0131	0.311013	0.972992
hsa-mir-379_68424	25.4234	-0.858103	0.847774	-1.01218	0.31145	NA
hsa-mir-99a_293058	72.5219	0.46966	0.464162	1.01185	0.311612	0.972992
RNY4P10-201_134488	1477.8	-0.624719	0.617854	-1.01111	0.311963	0.972992
hsa-mir-486-2_17436	28.0068	0.824918	0.816221	1.01065	0.312182	NA
hsa-mir-223_367902	312.226	-0.301759	0.298686	-1.01029	0.312358	0.972992
hsa-mir-486-2_32560	205.528	0.706745	0.699728	1.01003	0.312482	0.972992
hsa-mir-4433a_240937	219.101	-0.60667	0.601072	-1.00931	0.312824	0.972992
hsa-mir-152_271119	132.552	-0.285943	0.283608	-1.00824	0.313341	0.973258
ENST00000387400.1_231612	25.7928	0.90453	0.898039	1.00723	0.313825	NA
hsa-mir-10a_270052	29.8218	0.856986	0.851534	1.0064	0.314222	0.97465
hsa-mir-664a_193649	20.6268	0.959887	0.955117	1.00499	0.3149	NA
hsa-mir-21_101079	19.6247	-0.464814	0.462663	-1.00465	0.315065	NA
hsa-mir-30d_143223	10319.3	-0.295172	0.293904	-1.00431	0.315228	0.975419
hsa-mir-181a-2_338902	365.973	-0.388851	0.387349	-1.00388	0.315437	0.975419
hsa-mir-421_213884	15.9222	1.03716	1.03362	1.00342	0.315656	NA
hsa-mir-222_360567	79.8698	0.717041	0.714758	1.00319	0.315768	0.975419
RNY4P14-201_287787	13.0773	0.786935	0.784804	1.00272	0.315998	NA
ENST00000464816.1_121348	16.5587	-1.41363	1.41039	-1.0023	0.316197	NA
RP11-846F4.3-001_241657	27.0159	-0.91765	0.918365	-0.999222	0.317687	NA
hsa-mir-374c_123683	33.517	-0.870172	0.871164	-0.998861	0.317862	0.978923
ENST00000445125.2_250755	33.6816	-1.6051	1.60853	-0.997865	0.318345	0.978923
hsa-let-7g_162577	31.9961	-0.893955	0.8967	-0.996939	0.318794	0.978923
hsa-mir-223_166714	202.068	-0.444056	0.445497	-0.996766	0.318878	0.978923
hsa-mir-199a-1_122498	25.2909	0.983095	0.986332	0.996718	0.318901	NA
hsa-let-7b_372918	31.6322	0.995973	0.999605	0.996366	0.319073	0.978923
hsa-mir-20a_153808	21.429	-0.745986	0.748828	-0.996204	0.319151	NA
hsa-mir-425_59144	246.988	0.413097	0.415302	0.99469	0.319887	0.980089
hsa-mir-151a_135844	1336.8	-0.340049	0.342603	-0.992543	0.320933	0.980213
hsa-mir-424_145145	55.2601	-1.06407	1.07226	-0.992362	0.321021	0.980213
hsa-mir-155_58638	15.8068	0.666385	0.671907	0.991782	0.321304	NA
hsa-mir-26a-2_315236	23.9111	-0.848856	0.856143	-0.991488	0.321447	NA
RP11-846F4.3-001_34739	43.2532	1.56745	1.58144	0.991153	0.321611	0.980213
hsa-mir-30d_325302	12.1531	-0.927818	0.93619	-0.991057	0.321658	NA
hsa-mir-126_192882	375.353	-0.468187	0.47242	-0.991039	0.321666	0.980213
hsa-mir-140_210524	15.5343	0.72301	0.729629	0.990928	0.321721	NA
RNY4P16-201_16599	11.7987	-1.20674	1.21831	-0.990503	0.321928	NA
hsa-mir-26a-2_101255	12.0832	-1.04292	1.05437	-0.989142	0.322593	NA
hsa-mir-4286_160236	20.4256	1.02187	1.03312	0.989105	0.322612	NA
hsa-mir-330_90467	19.486	-0.84414	0.854137	-0.988296	0.323008	NA
hsa-mir-486-2_352405	38.6329	0.52849	0.535727	0.98649	0.323893	0.985665
ENST00000387449.1_225978	15.0627	-1.05676	1.07231	-0.985496	0.32438	NA
RNY4P10-201_383736	90.7186	1.91464	1.94375	0.985023	0.324613	0.986525
hsa-let-7a-1_331959	15.6763	1.05104	1.06815	0.98398	0.325125	NA
hsa-mir-151a_22148	54.9397	-0.839252	0.853271	-0.98357	0.325327	0.9869
tRNA-Gly-GCC-1-5_332833	15.3107	-1.29504	1.3171	-0.983248	0.325486	NA
hsa-mir-125b-1_374809	98.1956	0.539953	0.549295	0.982992	0.325611	0.9869
hsa-mir-486-2_243250	9.22328	0.94632	0.963619	0.982047	0.326077	NA
ENST00000387342.1_142606	31.51	-0.966499	0.98443	-0.981786	0.326205	0.987374
hsa-mir-30a_109525	19.338	0.661471	0.675182	0.979692	0.327238	NA
hsa-let-7a-1_247503	157.998	-0.3615	0.369086	-0.979446	0.32736	0.988064
hsa-mir-10b_254995	3338.97	0.412355	0.42124	0.978908	0.327625	0.988064
tRNA-Leu-CAG-2-2_88942	20.131	1.09717	1.12089	0.978842	0.327658	NA
hsa-mir-126_274372	57.6497	0.615265	0.628681	0.97866	0.327748	0.988064
hsa-mir-324_216570	80.4221	0.777633	0.795707	0.977285	0.328428	0.988483
hsa-mir-146a_255194	99.8423	-0.454667	0.465611	-0.976497	0.328818	0.988483
hsa-mir-486-2_139208	27.1092	0.820723	0.840533	0.976432	0.32885	NA
hsa-mir-151a_83353	22.4289	-0.607281	0.622441	-0.975645	0.32924	NA
RNY4P10-201_156655	17.3335	1.37725	1.41212	0.975307	0.329408	NA
hsa-mir-320a_336052	3014.35	-0.541499	0.555682	-0.974476	0.32982	0.988483
hsa-mir-199a-1_309719	18.9724	0.742077	0.761747	0.974178	0.329968	NA
hsa-mir-20a_351079	40.8613	-0.883133	0.907996	-0.972618	0.330743	0.988483
hsa-mir-146a_320984	8.35646	-0.858471	0.882706	-0.972544	0.33078	NA
hsa-mir-7-1_221672	230.317	-0.531231	0.547278	-0.970678	0.331709	0.988483
hsa-let-7b_318816	72.3401	0.490152	0.505126	0.970356	0.331869	0.988483
ENST00000387377.1_160765	350.344	1.57396	1.62214	0.970298	0.331898	0.988483
ENST00000387347.2_102497	14.9941	1.31708	1.35958	0.968739	0.332676	NA
hsa-mir-320a_201853	21.1757	-1.29005	1.3323	-0.968289	0.3329	NA
hsa-mir-107_365784	47.9228	-0.830563	0.858196	-0.9678	0.333144	0.988483
ENST00000551112.1_320339	31.8061	-1.37697	1.42384	-0.967084	0.333502	0.988483
hsa-mir-185_300140	241.925	0.383565	0.396668	0.966967	0.333561	0.988483
hsa-mir-146b_252619	15.6946	0.938433	0.971101	0.96636	0.333864	NA
RNY4P23-201_181378	32.6326	-0.718698	0.743796	-0.966257	0.333916	0.988483
hsa-mir-26a-2_379023	5493.83	-0.414635	0.429467	-0.965464	0.334312	0.988483
tRNA-Glu-CTC-1-7_380191	1385.87	1.67652	1.73856	0.964315	0.334888	0.988483
ENST00000500358.6_53779	91.327	0.922851	0.957148	0.964167	0.334962	0.988483
hsa-mir-27a_331029	22.9723	0.659872	0.68451	0.964007	0.335043	NA
hsa-mir-548j_176866	22.0676	-0.929722	0.96458	-0.963862	0.335115	NA
hsa-mir-21_84532	44.8525	-0.48136	0.499475	-0.963733	0.33518	0.988483
hsa-mir-199a-1_259740	28.7215	-0.789063	0.818786	-0.963699	0.335197	NA
hsa-mir-671_162937	20.1464	-1.01512	1.05669	-0.960654	0.336726	NA
hsa-mir-126_269593	520.932	-0.234676	0.244475	-0.959919	0.337096	0.988483
hsa-mir-4446_229244	32.4065	-0.747576	0.779873	-0.958587	0.337767	0.988483
hsa_piR_020009|gb|DQ597484|Homo_sapiens_93225	20.6326	-0.901551	0.941564	-0.957504	0.338313	NA
hsa-mir-23a_282670	547.346	-0.348753	0.364537	-0.956703	0.338717	0.988483
ENST00000464816.1_368720	22.1614	1.70477	1.78362	0.955791	0.339178	NA
hsa-let-7b_296243	16.6149	0.872869	0.913544	0.955475	0.339337	NA
hsa-mir-106b_205021	270.087	0.257494	0.269624	0.955014	0.33957	0.988483
hsa-let-7a-1_105755	52980.2	-0.304409	0.318778	-0.954926	0.339615	0.988483
hsa-mir-3184_159349	75.6633	-0.344215	0.360716	-0.954254	0.339955	0.988483
hsa_piR_018570|gb|DQ595536|Homo_sapiens_271091	61.0601	-0.568115	0.595698	-0.953696	0.340237	0.988483
hsa-mir-378a_268345	33.4443	0.817546	0.857532	0.95337	0.340403	0.988483
ENST00000572227.1_77856	55.7783	-1.07776	1.13064	-0.953225	0.340476	0.988483
hsa-mir-1-2_265226	131.491	-1.04982	1.10166	-0.952938	0.340622	0.988483
hsa-mir-30a_355731	56.1399	-0.458718	0.481793	-0.952105	0.341044	0.988483
hsa-mir-345_52205	19.6503	0.813513	0.855073	0.951396	0.341403	NA
hsa-mir-21_216457	1920.34	-0.48492	0.509728	-0.951332	0.341436	0.988483
hsa-let-7d_84425	7.94608	-0.893743	0.940691	-0.950092	0.342065	NA
ENST00000387347.2_352836	39.1176	1.32254	1.3949	0.948127	0.343065	0.988483
hsa-let-7b_172837	13.861	0.816147	0.862435	0.946329	0.343981	NA
tRNA-Glu-CTC-1-7_278262	2781.36	1.68987	1.78687	0.945713	0.344295	0.988483
RNY4P10-201_49548	348.538	1.53482	1.62329	0.945502	0.344402	0.988483
AC106782.9-001_274526	126.443	-0.986363	1.04365	-0.94511	0.344603	0.988483
hsa-mir-361_205650	15.7027	-0.395307	0.418312	-0.945004	0.344657	NA
hsa-mir-18a_235875	97.2244	-0.890771	0.943254	-0.94436	0.344986	0.988483
hsa-mir-652_1558	74.9128	1.09507	1.16008	0.94396	0.34519	0.988483
tRNA-Val-AAC-1-1_226130	126.645	1.41159	1.49561	0.943822	0.345261	0.988483
hsa-mir-128-1_86170	136.415	0.345726	0.367597	0.940503	0.346959	0.988483
RNY1-201_334946	1484.73	1.6238	1.72804	0.93968	0.347382	0.988483
ENST00000387441.1_234844	89.4486	1.38591	1.47525	0.93944	0.347505	0.988483
hsa-mir-24-2_309411	41.2901	-0.793903	0.845155	-0.939358	0.347547	0.988483
ENST00000416946.1_2607	707.792	-0.795371	0.847017	-0.939026	0.347717	0.988483
hsa-mir-186_122545	220.652	0.388426	0.413919	0.938413	0.348032	0.988483
hsa_piR_016659|gb|DQ592932|Homo_sapiens_250620	15.1584	-1.00357	1.07138	-0.936706	0.34891	NA
hsa-mir-339_273986	21.5244	-1.11472	1.19255	-0.934734	0.349926	NA
hsa-mir-10a_45549	40.2195	0.433753	0.464471	0.933866	0.350373	0.988483
RNY4-201_113992	40.15	0.906641	0.971055	0.933665	0.350477	0.988483
RNY4P10-201_164680	220.769	1.48719	1.59336	0.933363	0.350633	0.988483
hsa-mir-142_108887	37.4522	-0.619961	0.664256	-0.933317	0.350656	0.988483
hsa-mir-16-1_297369	19.0481	0.63856	0.685013	0.932187	0.35124	NA
hsa-mir-98_266892	527.942	-0.312334	0.335431	-0.931142	0.35178	0.988483
ENST00000387400.1_181210	50.2592	1.02991	1.10625	0.930995	0.351856	0.988483
hsa-mir-151a_243933	1230.29	-0.460416	0.494959	-0.930211	0.352262	0.988483
hsa-mir-9-2_236307	22.3486	-0.915045	0.984252	-0.929686	0.352534	NA
hsa-mir-126_256764	20.1163	-0.719947	0.775226	-0.928693	0.353048	NA
hsa-mir-493_200222	33.4628	-0.993172	1.06967	-0.928487	0.353155	0.988483
RNY4P10-201_75849	95.2442	-0.824781	0.888519	-0.928265	0.35327	0.988483
hsa-let-7e_273015	16.4937	-1.24482	1.34114	-0.92818	0.353314	NA
hsa-mir-3615_252353	23.521	0.79895	0.861254	0.92766	0.353584	NA
hsa-mir-143_171206	17.04	0.758273	0.817634	0.927399	0.353719	NA
hsa-mir-223_329595	58.7455	0.636256	0.686434	0.926901	0.353978	0.988483
hsa-mir-320c-1_54530	31.1174	0.630386	0.680129	0.926861	0.353998	0.988483
hsa-mir-144_126839	50.3449	1.00322	1.08304	0.926307	0.354287	0.988483
RNY1-201_148133	207.771	1.42398	1.53752	0.926156	0.354365	0.988483
ENST00000387421.1_58892	41.1612	-0.636936	0.687751	-0.926114	0.354387	0.988483
AC090260.5-001_326792	15.6948	1.06342	1.14919	0.925363	0.354777	NA
hsa-mir-320a_140039	67.8398	-0.6299	0.681121	-0.924799	0.35507	0.988483
RNY4P10-201_106634	21.0276	1.2326	1.33335	0.924439	0.355258	NA
ENST00000387377.1_205741	59.3617	1.31086	1.41958	0.923417	0.35579	0.988483
hsa-mir-21_207515	14.2149	-0.552099	0.598116	-0.923063	0.355974	NA
hsa-mir-139_108018	127.473	-0.332371	0.360251	-0.922611	0.35621	0.988483
hsa-mir-451b_229863	724.859	-0.59593	0.646021	-0.922462	0.356288	0.988483
hsa-mir-223_67388	15.3609	0.627432	0.681238	0.921017	0.357041	NA
hsa-mir-181a-2_27339	23.7463	-0.709785	0.770837	-0.920798	0.357156	NA
hsa-mir-10b_381432	1642.15	0.486915	0.528823	0.920753	0.35718	0.988483
hsa-mir-342_74532	16.9053	-0.821834	0.892948	-0.92036	0.357385	NA
hsa-mir-30d_241217	5568.23	0.275465	0.29938	0.920118	0.357511	0.988483
hsa-mir-454_227668	38.6158	-0.894588	0.972508	-0.919877	0.357637	0.988483
ENST00000387377.1_188161	76.6717	1.33378	1.45189	0.918653	0.358277	0.988483
hsa-mir-23b_325328	10.0989	1.02354	1.11419	0.918643	0.358282	NA
RNY4P27-201_99301	93.6828	1.41871	1.54441	0.918605	0.358302	0.988483
hsa-mir-10a_22406	74.8044	0.350545	0.381615	0.918583	0.358314	0.988483
hsa-mir-379_322388	7.96173	-1.53566	1.67252	-0.918172	0.358529	NA
hsa-mir-155_141326	78.5315	0.538563	0.586774	0.917838	0.358704	0.988483
hsa-mir-942_95599	94.0709	-0.304055	0.331428	-0.917408	0.358929	0.988483
hsa-mir-25_367105	15.0349	1.03201	1.12513	0.917238	0.359018	NA
RNY4P7-201_181623	45.5133	1.36405	1.48729	0.917139	0.35907	0.988483
hsa-mir-28_275135	129.07	-0.508684	0.554789	-0.916895	0.359198	0.988483
RNY4P20-201_348553	34.8593	1.66644	1.81762	0.916827	0.359233	0.988483
hsa-mir-151a_140843	34.5245	0.409643	0.446918	0.916595	0.359355	0.988483
hsa-mir-142_225748	10.4545	1.14113	1.245	0.91657	0.359368	NA
hsa-let-7i_153634	16.9829	0.483613	0.528582	0.914925	0.360231	NA
hsa-mir-197_52583	74.7014	0.416724	0.455692	0.914486	0.360461	0.988483
hsa-mir-222_250888	21.9045	1.09061	1.19269	0.914413	0.3605	NA
hsa-mir-223_300599	385.792	0.310848	0.340077	0.914052	0.360689	0.988483
hsa-mir-26b_16349	16.8319	-1.00342	1.09791	-0.913941	0.360748	NA
hsa-mir-484_221571	52.5034	-0.60469	0.661968	-0.913473	0.360994	0.988483
hsa-mir-150_351511	461.349	0.319702	0.350369	0.912473	0.36152	0.988483
hsa-mir-320a_117120	12.1236	0.840577	0.921716	0.911969	0.361785	NA
hsa-mir-320a_329546	16.4465	-0.90362	0.991361	-0.911495	0.362035	NA
hsa-mir-28_44074	11.3449	-1.26496	1.39269	-0.908284	0.363728	NA
hsa-mir-486-2_336652	13.8025	0.669041	0.736611	0.908269	0.363736	NA
hsa-mir-320a_47918	32.9193	-0.524337	0.577815	-0.907449	0.364169	0.988483
hsa-mir-181b-2_22160	34.8478	0.507053	0.558808	0.907383	0.364205	0.988483
RNY4P6-201_74125	24.005	1.24442	1.37276	0.906514	0.364664	NA
hsa-mir-222_85662	8.62103	-0.956274	1.05528	-0.906184	0.364839	NA
hsa-mir-625_373055	60.4411	-0.365391	0.403602	-0.905325	0.365293	0.988483
hsa-mir-338_8122	12.6951	1.30859	1.447	0.904346	0.365812	NA
hsa-mir-3184_246435	19.2018	0.588786	0.651063	0.904345	0.365812	NA
hsa-mir-152_98966	449.756	-0.404487	0.447605	-0.90367	0.366171	0.988483
hsa-mir-26b_140017	47.1569	-0.421664	0.46673	-0.903443	0.366291	0.988483
hsa-mir-125a_134980	407.045	0.512987	0.567818	0.903436	0.366295	0.988483
hsa-mir-330_56411	91.761	-0.449132	0.49793	-0.901998	0.367058	0.988483
hsa-mir-590_135536	14.3064	-0.931497	1.03353	-0.901276	0.367442	NA
hsa-mir-320a_199845	20.4359	-0.795398	0.882724	-0.901072	0.36755	NA
hsa-mir-130b_164059	270.238	-0.316376	0.351123	-0.901039	0.367568	0.988483
ENST00000362765.1_74722	46.9859	-0.38512	0.427843	-0.900143	0.368044	0.988483
RNY4P20-201_212178	14.3668	1.52506	1.69745	0.898441	0.368951	NA
hsa-mir-146a_69461	182.711	-0.31517	0.350902	-0.898171	0.369094	0.988483
hsa-mir-451b_129810	14.8894	1.21913	1.35805	0.897708	0.369341	NA
hsa-mir-21_329161	42.6185	0.38745	0.432095	0.896677	0.369891	0.988483
hsa-mir-374a_340673	37.434	-0.458471	0.512209	-0.895087	0.370741	0.988483
hsa-let-7a-1_33941	4114.97	-0.409492	0.457511	-0.895043	0.370764	0.988483
hsa-let-7c_147780	24.0309	-0.812374	0.907894	-0.894789	0.3709	NA
hsa-mir-21_197793	17.6337	-1.09064	1.21933	-0.894459	0.371076	NA
hsa-let-7a-1_197117	11456	-0.223906	0.250673	-0.89322	0.371739	0.988483
hsa-mir-140_122707	89.9154	0.37263	0.417512	0.892502	0.372124	0.988483
hsa-mir-181a-2_16363	549.784	-0.259206	0.290458	-0.892407	0.372175	0.988483
hsa-let-7b_386977	17.9758	1.10992	1.24377	0.892384	0.372187	NA
hsa-mir-222_276581	12.7065	-1.01113	1.13405	-0.891609	0.372602	NA
hsa-mir-144_283561	14.6115	1.27053	1.4251	0.891539	0.37264	NA
hsa-mir-432_6834	117	-0.6466	0.726084	-0.89053	0.373181	0.988483
RNY4P16-201_324889	36.9429	-1.0523	1.18175	-0.890454	0.373222	0.988483
hsa-mir-221_300710	43.7108	0.640785	0.719805	0.89022	0.373348	0.988483
hsa-mir-92a-1_354518	73.1892	-0.491933	0.552849	-0.889814	0.373566	0.988483
hsa-mir-3184_124277	574.139	-0.370958	0.417093	-0.889388	0.373794	0.988483
RNY4P10-201_383018	296.598	1.47613	1.66048	0.888975	0.374017	0.988483
ENST00000362330.2_41385	19.0579	1.52206	1.71277	0.888653	0.37419	NA
hsa-mir-223_113424	34.9029	-0.303121	0.341108	-0.888636	0.374199	0.988483
hsa-let-7b_139933	119.464	0.538422	0.605996	0.888492	0.374276	0.988483
hsa-mir-652_123579	27.7709	-0.885055	0.996324	-0.88832	0.374368	NA
hsa-mir-374a_189382	819.703	-0.414196	0.4666	-0.88769	0.374707	0.988483
hsa-mir-130a_323698	105.384	0.240858	0.271349	0.887632	0.374739	0.988483
ENST00000445125.2_320309	13.3702	-1.28034	1.44335	-0.887066	0.375043	NA
RNY4P20-201_317536	165.516	1.37973	1.55539	0.887061	0.375046	0.988483
tRNA-Glu-TTC-2-2_348039	100.751	1.51308	1.70988	0.884903	0.376209	0.988483
RNY4P18-201_341754	75.3605	-1.00634	1.1375	-0.884695	0.376321	0.988483
hsa-mir-140_80503	1079.21	-0.298287	0.337494	-0.883828	0.376789	0.988483
hsa-mir-106b_85315	11.6023	0.92616	1.04808	0.883674	0.376872	NA
hsa-mir-140_227790	18.986	1.0073	1.14094	0.882868	0.377308	NA
hsa-mir-3184_110948	888.415	0.401762	0.455506	0.882013	0.37777	0.988483
tRNA-Pro-TGG-1-1_51610	22.1391	0.990619	1.12318	0.88198	0.377788	NA
hsa-let-7f-2_317329	18.107	0.704275	0.798526	0.881969	0.377793	NA
hsa-mir-223_306262	12.56	-0.730139	0.827934	-0.88188	0.377842	NA
hsa-mir-21_245837	142.717	-0.40069	0.454458	-0.881686	0.377947	0.988483
hsa-mir-106b_368694	13.4964	0.990898	1.12434	0.881312	0.378149	NA
hsa-mir-942_55321	19.5554	1.5314	1.73933	0.880457	0.378612	NA
tRNA-Lys-CTT-4-1_124198	21.7031	0.843678	0.958472	0.880232	0.378733	NA
tRNA-Gly-GCC-1-5_357681	25.36	-0.951931	1.08164	-0.880079	0.378816	NA
RNY4P10-201_119772	154.821	1.4066	1.59853	0.879933	0.378896	0.988483
hsa-mir-1908_52801	147.327	-0.530635	0.603381	-0.879435	0.379165	0.988483
ENST00000364535.1_323918	142.947	1.35463	1.54067	0.879243	0.379269	0.988483
RNY4P10-201_295636	115.506	1.32039	1.50293	0.87855	0.379645	0.988483
RNY4-201_376505	118.57	1.35812	1.54603	0.878452	0.379698	0.988483
hsa-mir-21_299359	19.947	-0.391535	0.445808	-0.878261	0.379802	NA
hsa-mir-181b-2_35370	102.951	-0.34243	0.390576	-0.876731	0.380633	0.988483
RNY4-201_372350	121.818	-0.488919	0.558591	-0.875272	0.381426	0.988483
RNY4P10-201_227525	297.479	1.42633	1.62975	0.875185	0.381473	0.988483
ENST00000445125.2_33782	39.7908	-1.45127	1.65828	-0.875167	0.381483	0.988483
RNY4P10-201_278129	317.839	1.43254	1.63694	0.875133	0.381502	0.988483
hsa-mir-26b_268966	17.7233	-0.588683	0.672764	-0.875022	0.381562	NA
PAQR5-201_309975	55.899	1.25699	1.43705	0.874701	0.381736	0.988483
hsa-mir-223_213079	31.887	0.865796	0.990567	0.874041	0.382096	0.988483
RP3-481F12.6-001_279623	212.369	-0.502388	0.574803	-0.874017	0.382109	0.988483
hsa-mir-26a-2_201231	61.0805	-0.517828	0.593165	-0.872992	0.382668	0.988483
hsa-mir-3620_13629	18.8919	-0.473198	0.542825	-0.871733	0.383354	NA
hsa-mir-326_228954	235.683	-0.378908	0.434676	-0.871702	0.383371	0.988483
hsa-mir-101-1_9835	37.9253	-0.486808	0.55914	-0.870637	0.383953	0.988483
hsa-mir-99b_362070	49.282	0.332681	0.382273	0.870271	0.384152	0.988483
hsa-mir-12136_23534	293.038	1.38231	1.58855	0.870166	0.38421	0.988483
hsa-mir-2355_282122	46.7249	-1.0037	1.15377	-0.869933	0.384337	0.988483
hsa-mir-543_93913	205.319	-0.793726	0.912556	-0.869783	0.384419	0.988483
hsa-mir-151a_123286	50.3892	-0.707169	0.814446	-0.868282	0.38524	0.988483
hsa-mir-16-2_235184	331.928	0.258983	0.298286	0.868236	0.385265	0.988483
RNY3P2-201_46167	124.759	1.29978	1.49728	0.868096	0.385342	0.988483
hsa-mir-342_307315	98.7427	-0.393981	0.454119	-0.867574	0.385628	0.988483
hsa_piR_000823|gb|DQ571031|Homo_sapiens_37959	13.1083	0.821024	0.948684	0.865434	0.386801	NA
hsa-mir-342_28467	287.896	-0.254015	0.293723	-0.864812	0.387142	0.988483
hsa-mir-380_338449	16.3891	0.786372	0.909641	0.864486	0.387321	NA
hsa-mir-29a_340338	292.539	0.41014	0.47551	0.862527	0.388398	0.988483
tRNA-Glu-TTC-14-1_249117	24.6001	1.29106	1.49685	0.862517	0.388403	NA
SMC1A-202_29474	45.8714	-0.999537	1.1599	-0.861743	0.388829	0.988483
hsa-mir-942_354687	33.0125	0.704616	0.81795	0.861442	0.388995	0.988483
hsa-mir-345_48371	58.9109	0.371615	0.432419	0.859386	0.390127	0.988483
hsa-mir-27b_367976	257.522	-0.327743	0.38147	-0.859157	0.390254	0.988483
AC090260.5-001_277036	24.8905	-0.683751	0.796498	-0.858446	0.390646	NA
RP11-752G15.5-002_350775	786.288	-0.344727	0.401821	-0.857913	0.390941	0.988483
hsa-mir-3184_106639	4788.89	-0.367562	0.428781	-0.857225	0.39132	0.988483
hsa-mir-92a-2_101127	10.7786	0.419094	0.489175	0.856737	0.39159	NA
hsa-let-7g_188854	923.457	-0.283596	0.331633	-0.855149	0.392469	0.988483
RNY4P14-201_69791	22.2428	-0.879853	1.0298	-0.854388	0.39289	NA
ENST00000387460.2_145385	183.243	1.571	1.83964	0.853971	0.393121	0.988483
tRNA-Glu-CTC-1-7_341161	25.2184	1.38032	1.61998	0.852062	0.39418	NA
hsa_piR_020326|gb|DQ597916|Homo_sapiens_150614	68.8333	-1.03818	1.21869	-0.85188	0.394281	0.988483
hsa-let-7a-3_352218	16.9349	1.08976	1.28148	0.850389	0.395109	NA
hsa-mir-335_331039	398.006	-0.325215	0.382683	-0.84983	0.395419	0.988483
tRNA-Glu-TTC-14-1_120208	43.1501	1.43106	1.68507	0.849256	0.395739	0.988483
ENST00000387400.1_335182	13.5892	1.29168	1.52099	0.849234	0.395751	NA
hsa-mir-92a-1_194499	46.5173	0.437611	0.515439	0.849007	0.395877	0.988483
RNY4P10-201_2951	160.524	1.32715	1.56592	0.84752	0.396706	0.988483
hsa-mir-92a-1_43606	180.94	-0.496622	0.586158	-0.847249	0.396856	0.988483
ENST00000551112.1_219893	19.9082	-1.27973	1.51222	-0.846262	0.397406	NA
hsa-mir-20a_386050	90.5629	-0.502848	0.595235	-0.84479	0.398228	0.988483
hsa-mir-484_370357	13.4454	0.904806	1.07116	0.844693	0.398282	NA
RP11-18O13.1-004_115585	72.7391	1.03719	1.23052	0.842884	0.399293	0.988483
hsa-mir-487b_82745	69.4464	-0.433709	0.515037	-0.842094	0.399735	0.988483
RNY4-201_300532	1132.66	-0.388441	0.461347	-0.84197	0.399805	0.988483
hsa-mir-30c-2_122405	21.875	1.53287	1.82155	0.841519	0.400057	NA
RP11-193H5.6-001_351401	26.6418	1.115	1.32559	0.841134	0.400273	NA
hsa-mir-142_25802	169.239	-0.391797	0.466133	-0.840525	0.400614	0.988483
DKC1-213_251334	11.3266	1.11407	1.32568	0.84038	0.400696	NA
hsa-let-7b_77688	371.91	-0.49536	0.589457	-0.840367	0.400703	0.988483
ENST00000416946.1_362172	967.41	-0.745831	0.887725	-0.84016	0.400819	0.988483
hsa-mir-143_203455	22.5733	0.581843	0.692766	0.839883	0.400974	NA
hsa-mir-17_131365	48.5976	-0.937273	1.11669	-0.83933	0.401284	0.988483
hsa-mir-181b-2_152157	19.1908	-0.693395	0.826183	-0.839275	0.401315	NA
hsa-mir-25_244339	608.992	0.27717	0.330303	0.839138	0.401392	0.988483
RNY4P3-201_124666	208.958	1.34044	1.59806	0.838793	0.401586	0.988483
hsa-let-7d_56389	19.0592	1.01184	1.2087	0.837131	0.402519	NA
hsa-mir-454_343771	81.9207	-0.681986	0.814739	-0.837061	0.402558	0.988483
hsa-mir-126_107243	9.82747	-1.09771	1.31148	-0.837001	0.402592	NA
hsa-mir-210_93088	73.2154	-0.58963	0.70465	-0.83677	0.402722	0.988483
hsa-mir-374c_44845	615.561	0.327396	0.391829	0.83556	0.403402	0.988483
hsa-mir-320a_307805	36.6181	-0.837565	1.00467	-0.833675	0.404464	0.988483
hsa-mir-103b-1_145429	1220.86	-0.314879	0.37837	-0.832197	0.405298	0.988483
ENST00000445125.2_355929	31.5873	0.710262	0.854166	0.831528	0.405676	0.988483
RNY4-201_25199	290.9	0.537687	0.647546	0.830345	0.406344	0.988483
hsa-mir-12136_281214	62.7083	1.1993	1.44456	0.830223	0.406413	0.988483
hsa-mir-584_194896	63.0368	-0.412539	0.49694	-0.830159	0.406449	0.988483
RNY1-201_372714	517.93	1.35095	1.62784	0.829907	0.406591	0.988483
hsa-mir-224_2540	12.7169	-1.31937	1.59082	-0.829369	0.406896	NA
hsa-mir-486-2_11543	110.477	0.65524	0.791191	0.828168	0.407575	0.988483
hsa-let-7f-2_16319	19.8176	-0.381814	0.461158	-0.827947	0.4077	NA
RNY3-201_34578	19.6715	1.12388	1.35862	0.827223	0.408111	NA
RNY4P16-201_317202	115.346	-0.669853	0.809997	-0.826982	0.408247	0.988483
hsa-mir-320c-1_167670	12.2344	-0.825815	0.999109	-0.826552	0.408491	NA
hsa-mir-150_213722	11.1033	-0.436935	0.528879	-0.826152	0.408718	NA
hsa-mir-151b_383745	22.2782	0.439834	0.532777	0.825551	0.409059	NA
hsa-mir-21_252221	165.931	-0.22587	0.273697	-0.825256	0.409226	0.988483
hsa-mir-574_324721	304.209	0.37476	0.454461	0.824627	0.409584	0.988483
RNY4P10-201_353533	796.07	0.353202	0.428488	0.824299	0.40977	0.988483
hsa-mir-92b_322636	31.054	0.745306	0.904594	0.823912	0.40999	0.988483
ENST00000416946.1_138916	534.058	-0.714988	0.868675	-0.823078	0.410463	0.988483
RNY4P10-201_230460	101.77	1.24277	1.51071	0.822642	0.410712	0.988483
hsa-mir-12136_129496	30.3687	1.31174	1.59576	0.822017	0.411067	0.988483
RNY4P10-201_201253	189.693	1.30399	1.58789	0.821208	0.411528	0.988483
hsa-mir-10a_151108	71.4722	0.559568	0.681404	0.821198	0.411533	0.988483
hsa-mir-12136_24592	79.6914	1.18664	1.44546	0.820941	0.41168	0.988483
hsa-mir-151a_180172	25.7879	0.782465	0.953824	0.820345	0.412019	NA
hsa-mir-10a_44529	666.326	0.257551	0.314057	0.820077	0.412172	0.988483
RNY4P10-201_115365	23.6976	1.10513	1.35113	0.81793	0.413397	NA
RNY4P20-201_63638	671.438	1.39204	1.70199	0.817892	0.413419	0.988483
hsa-mir-382_284322	34.5018	0.812773	0.994036	0.81765	0.413557	0.988483
tRNA-Val-CAC-4-1_254422	76.5826	1.21513	1.48681	0.817274	0.413772	0.988483
tRNA-Thr-CGT-4-1_47036	12.8091	-0.85917	1.05126	-0.817273	0.413772	NA
hsa-mir-16-2_295697	30.7153	-0.874693	1.07081	-0.816848	0.414015	0.988483
hsa-mir-106b_130288	1398.92	0.451949	0.553809	0.816074	0.414458	0.988483
hsa-mir-186_25085	841.004	-0.304943	0.373821	-0.815746	0.414645	0.988483
hsa-mir-30b_277000	15.9832	-0.622943	0.76369	-0.815701	0.414671	NA
RNY4-201_351334	34.2336	1.24982	1.533	0.815281	0.414911	0.988483
hsa-mir-181a-2_357750	61.8448	-0.306632	0.376395	-0.814656	0.415269	0.988483
hsa-let-7b_382980	15.0553	0.43364	0.532337	0.814596	0.415304	NA
hsa-mir-21_25940	14.082	0.885897	1.08918	0.813358	0.416013	NA
RNY4P9-201_6345	63.3192	1.16662	1.43497	0.812993	0.416222	0.988483
hsa-mir-223_258447	33.9252	-0.944136	1.16371	-0.811318	0.417183	0.988483
hsa-mir-483_4669	63.5137	-0.58378	0.719797	-0.811034	0.417346	0.988483
hsa-mir-98_181750	86.8536	-0.682923	0.842583	-0.810511	0.417646	0.988483
RNY4P10-201_327018	257.736	1.29432	1.59814	0.809891	0.418003	0.988483
hsa-mir-185_32536	52.7296	0.399913	0.494015	0.809516	0.418218	0.988483
hsa_piR_020485|gb|DQ598159|Homo_sapiens_53759	105.454	-0.334699	0.41376	-0.808921	0.418561	0.988483
hsa-mir-28_47493	87.8425	-0.685255	0.847272	-0.808778	0.418643	0.988483
hsa-let-7f-2_62819	13.9547	0.533435	0.659788	0.808494	0.418806	NA
RNY4P7-201_53529	164.584	1.26812	1.56891	0.808276	0.418932	0.988483
tRNA-Glu-CTC-1-7_61701	7949.57	1.52677	1.88936	0.808088	0.41904	0.988483
RP3-481F12.6-001_296261	569.439	-0.437465	0.54142	-0.807996	0.419093	0.988483
hsa-mir-146b_322274	443.048	-0.278277	0.34472	-0.807255	0.41952	0.988483
hsa-mir-142_174090	40.2554	-0.650986	0.806569	-0.807105	0.419606	0.988483
RNY1P12-201_48006	60.201	-0.552769	0.685134	-0.806805	0.419779	0.988483
hsa-mir-16-1_272362	125.073	-0.368685	0.457006	-0.806741	0.419816	0.988483
hsa-mir-30b_14850	1312.28	-0.281682	0.349497	-0.805965	0.420263	0.988483
hsa-mir-30d_382764	10.574	-0.826736	1.02648	-0.80541	0.420583	NA
hsa-mir-30a_288499	394.617	0.350097	0.434919	0.804971	0.420836	0.988483
hsa-let-7b_77010	21.8824	0.263701	0.327631	0.804873	0.420893	NA
hsa-mir-185_81680	1237.49	-0.271212	0.337158	-0.804405	0.421163	0.988483
hsa-let-7f-2_140514	226.8	-0.456953	0.568193	-0.804222	0.421269	0.988483
hsa-mir-320a_3961	48.1288	0.631789	0.785839	0.803966	0.421416	0.988483
hsa-mir-329-1_252558	15.8504	-1.1124	1.38385	-0.803842	0.421488	NA
hsa-let-7a-3_2823	12.036	0.825252	1.02748	0.803177	0.421872	NA
hsa-let-7i_384371	24.736	-0.677333	0.844374	-0.802172	0.422453	NA
hsa-mir-21_289904	12.493	-0.460171	0.573688	-0.802129	0.422478	NA
hsa-mir-140_32850	32.0441	-0.625858	0.780396	-0.801975	0.422567	0.988483
hsa-let-7a-1_199965	152.333	-0.446471	0.556948	-0.801639	0.422762	0.988483
RNY1-201_323848	186.941	1.21943	1.52122	0.801615	0.422776	0.988483
hsa-let-7b_131255	14.4107	-0.894045	1.11587	-0.801207	0.423012	NA
hsa-mir-942_66178	36.5075	-0.424471	0.529805	-0.801183	0.423026	0.988483
RNY1-201_379967	98.1324	1.2086	1.50938	0.800729	0.423288	0.988483
hsa-mir-146b_354351	1455.08	-0.277405	0.346813	-0.799868	0.423787	0.988483
hsa-mir-486-2_185380	225.966	0.383922	0.480125	0.799631	0.423925	0.988483
RNY4P7-201_276271	208.494	1.27916	1.60062	0.799164	0.424195	0.988483
hsa-let-7e_20074	441.829	-0.285474	0.357346	-0.798874	0.424363	0.988483
hsa-mir-495_158727	95.9914	-0.776002	0.97211	-0.798265	0.424717	0.988483
RNY1-201_295577	214.221	1.23509	1.54991	0.796879	0.425521	0.988483
hsa-mir-30e_186936	4253.72	-0.259872	0.326219	-0.79662	0.425672	0.988483
hsa-mir-21_235688	111.777	-0.5329	0.669081	-0.796465	0.425762	0.988483
hsa-mir-4446_320378	281.319	-0.206429	0.259343	-0.795968	0.426051	0.988483
hsa-mir-374c_67124	1987	-0.31959	0.401697	-0.795601	0.426264	0.988483
RP3-481F12.6-001_361192	9.40567	-0.614879	0.773084	-0.795358	0.426405	NA
ENST00000387460.2_381893	131.357	1.42806	1.79606	0.795109	0.42655	0.988483
hsa-mir-486-2_303074	34.0176	-0.685248	0.862586	-0.794411	0.426956	0.988483
RNY4P23-201_12592	424.794	0.321992	0.405329	0.794395	0.426965	0.988483
RNY4P16-201_288146	292.443	-0.396326	0.498945	-0.794328	0.427004	0.988483
ENST00000445125.2_222815	64.2149	-0.95391	1.20191	-0.793661	0.427393	0.988483
hsa-mir-103b-1_337709	362.235	-0.299617	0.37808	-0.792469	0.428087	0.988625
RP11-315I20.11-001_367192	48.3997	-1.0836	1.36809	-0.79205	0.428331	0.988625
hsa-mir-30e_118316	21.1988	-0.977048	1.23361	-0.792027	0.428345	NA
hsa-mir-320a_223747	29.2938	-0.688453	0.871454	-0.790006	0.429524	NA
hsa-mir-769_250279	106.621	-0.377244	0.477708	-0.789695	0.429706	0.989906
tRNA-Glu-TTC-2-2_19840	111.168	0.410777	0.520238	0.789595	0.429764	0.989906
hsa-mir-140_372828	32.3366	0.412375	0.52365	0.787501	0.430989	0.990935
ENST00000623544.1_58256	30.704	1.28472	1.63553	0.78551	0.432155	0.990935
hsa-mir-26b_35208	108.547	0.446306	0.568541	0.785002	0.432452	0.990935
ENST00000641545.1_323849	113.878	-0.894292	1.13938	-0.784892	0.432517	0.990935
hsa-mir-12136_347580	150.84	1.21984	1.55494	0.784489	0.432753	0.990935
RNY1-201_249890	35.2319	1.05096	1.34104	0.783692	0.433221	0.990935
RNY4P10-201_245217	30.3307	1.65684	2.11445	0.78358	0.433287	0.990935
hsa-mir-378a_187591	187.538	0.438941	0.560911	0.782549	0.433892	0.991313
RNY4P27-201_256085	20.2004	1.07873	1.37887	0.78233	0.434021	NA
hsa-mir-432_242398	19.5156	-0.791392	1.01372	-0.780682	0.434989	NA
hsa-mir-20a_87860	863.465	-0.357397	0.4581	-0.780173	0.435289	0.991951
RNY4-201_172978	25.8122	1.03669	1.3293	0.779879	0.435462	NA
ENST00000365068.1_278501	58.7115	1.17776	1.51208	0.778897	0.436041	0.991951
ENST00000387460.2_242299	57.1391	1.32071	1.69578	0.778821	0.436085	0.991951
RNY4P10-201_337666	39.2026	1.14169	1.46608	0.778736	0.436135	0.991951
hsa-mir-486-2_89891	30.8736	0.677203	0.870755	0.777719	0.436734	0.991951
hsa-mir-320a_298121	126.724	0.310028	0.398703	0.77759	0.43681	0.991951
hsa-mir-181c_8405	11.6237	-0.855292	1.10166	-0.776363	0.437534	NA
hsa-mir-550b-2_69148	73.4102	0.697834	0.899669	0.775657	0.437952	0.993488
hsa-mir-29c_97594	13.8266	-0.663872	0.857141	-0.774519	0.438624	NA
hsa-mir-103b-1_355942	76.639	-0.709925	0.91666	-0.774469	0.438654	0.993488
RNY4-201_383160	33.4887	1.31116	1.69355	0.774206	0.438809	0.993488
hsa-mir-26a-2_138135	62.9255	0.412849	0.534025	0.773089	0.43947	0.993986
hsa-mir-142_310976	8.26262	0.851162	1.10227	0.772189	0.440003	NA
hsa-mir-140_52225	31.3272	0.645168	0.836134	0.771608	0.440347	0.994972
RNY4P10-201_264609	15372.1	1.46637	1.90332	0.770424	0.441049	0.995432
hsa-mir-320a_34567	21.082	0.367381	0.47703	0.770143	0.441215	NA
hsa-mir-186_162741	17.9996	-1.02728	1.33438	-0.769856	0.441385	NA
hsa-mir-25_157275	285.922	-0.191521	0.248864	-0.76958	0.441549	0.995432
RNY3-201_315486	31.4284	1.24606	1.62194	0.768248	0.44234	0.995432
hsa-mir-584_88525	89.902	-0.627578	0.818379	-0.766855	0.443168	0.995432
hsa-mir-329-1_57770	49.8438	-0.714728	0.932056	-0.766829	0.443183	0.995432
hsa-mir-27a_247659	51.0435	-0.626166	0.816863	-0.76655	0.443349	0.995432
hsa-mir-484_123028	13.5481	-0.775049	1.01149	-0.766248	0.443529	NA
hsa-mir-320a_220237	121.731	-0.520193	0.67905	-0.766061	0.44364	0.995432
hsa-let-7b_106740	15.7926	-0.742097	0.969169	-0.765704	0.443853	NA
ENST00000416946.1_272024	369.348	-0.657122	0.858648	-0.765298	0.444094	0.99546
RNY4-201_377845	24.16	1.08004	1.41394	0.763852	0.444956	NA
ENST00000487558.1_233958	14.695	-0.853613	1.11784	-0.763626	0.44509	NA
hsa-mir-28_345222	395.991	-0.391316	0.512599	-0.763396	0.445227	0.996775
hsa-let-7b_287706	22.1846	0.570809	0.748813	0.762286	0.445889	NA
RNY4P20-201_373629	94.268	1.16114	1.52518	0.761313	0.44647	0.996775
ENST00000387460.2_201220	353.682	1.46305	1.92299	0.760821	0.446764	0.996775
RNY4P27-201_223286	29.3556	1.09392	1.4392	0.760094	0.447198	NA
hsa-mir-26a-2_132631	25.6989	-0.497615	0.654837	-0.759907	0.44731	NA
hsa-mir-143_320961	1427.52	-0.413147	0.543967	-0.759507	0.447549	0.996775
hsa-mir-27b_33523	29.2297	-0.95936	1.26315	-0.759498	0.447555	NA
hsa-mir-12136_286251	230.931	1.16736	1.538	0.759009	0.447847	0.996775
hsa-mir-92a-2_202089	50.0783	0.498603	0.656982	0.75893	0.447895	0.996775
hsa-mir-484_7654	43.698	-0.770886	1.01586	-0.758852	0.447941	0.996775
hsa-let-7f-2_27881	2086.85	-0.331004	0.437142	-0.757199	0.44893	0.996775
hsa-mir-126_372981	147.487	0.300155	0.396472	0.757066	0.44901	0.996775
MMRN1-201_343963	30.8693	0.535167	0.707793	0.756106	0.449585	0.996775
hsa-let-7b_295024	72.8213	0.473211	0.626372	0.755479	0.449962	0.996775
hsa-mir-146a_192079	235.553	-0.340457	0.450799	-0.755231	0.45011	0.996775
hsa-mir-134_249721	18.3518	-1.06601	1.41316	-0.754344	0.450643	NA
RNY4P6-201_34475	14.6447	1.00333	1.33232	0.75307	0.451408	NA
RNY3P2-201_257881	17.3924	-0.907486	1.20603	-0.752457	0.451776	NA
hsa-mir-532_230143	641.423	-0.222168	0.29527	-0.752422	0.451797	0.996775
hsa-mir-221_176407	208.454	-0.275219	0.366064	-0.751833	0.452152	0.996775
hsa-mir-223_367280	24.7191	-0.531339	0.707218	-0.751308	0.452467	NA
hsa-mir-411_223555	46.329	-0.591226	0.787331	-0.750924	0.452698	0.996775
RNY4P17-201_203211	172.645	1.18873	1.58447	0.750241	0.45311	0.996775
hsa-mir-26b_216762	56.591	0.423565	0.564946	0.749744	0.453409	0.996775
RNY4P7-201_382053	236.803	1.17795	1.57199	0.749337	0.453654	0.996775
RP11-752G15.5-002_201172	34.7617	-0.750138	1.00249	-0.748276	0.454294	0.996775
hsa-mir-382_79913	47.3905	-0.743231	0.993979	-0.747733	0.454621	0.996775
hsa-mir-148b_89366	120.235	-0.550864	0.737205	-0.747232	0.454923	0.996775
hsa-mir-1843_197097	38.9808	-0.512825	0.686542	-0.746968	0.455083	0.996775
RNY4-201_203661	11.9475	-1.34761	1.80503	-0.746585	0.455314	NA
hsa-mir-485_270073	750.982	-0.547599	0.733691	-0.746362	0.455449	0.996775
hsa-mir-24-2_296035	12.1537	0.740742	0.9927	0.746189	0.455553	NA
hsa-mir-26b_117785	119.006	0.310972	0.416884	0.745944	0.455701	0.996775
RNY4P10-201_203479	50.127	1.11354	1.4929	0.745894	0.455732	0.996775
hsa-mir-26a-1_95668	17.4557	0.80377	1.07805	0.745576	0.455923	NA
hsa-mir-320a_339339	16.6664	-0.646611	0.868352	-0.744642	0.456488	NA
RNY4P14-201_271880	10.092	-0.710335	0.954211	-0.744421	0.456622	NA
tRNA-Gly-TCC-3-1_7078	108.075	0.473083	0.635753	0.744131	0.456797	0.997786
hsa-mir-26a-1_279273	17.8836	0.608307	0.817923	0.743722	0.457045	NA
hsa-mir-92a-1_125943	115.131	-0.624361	0.839572	-0.743666	0.457079	0.997786
hsa-mir-584_182575	73.1007	-0.536448	0.722549	-0.742438	0.457822	0.998301
hsa-mir-29a_328009	34.9765	0.589112	0.794198	0.741769	0.458227	0.998301
SMC1A-202_186134	110.746	-0.876067	1.18214	-0.741083	0.458643	0.998301
RNY3P2-201_59056	16.7445	-1.13948	1.53896	-0.740419	0.459046	NA
hsa-mir-495_306030	7.77973	-0.945307	1.27735	-0.740055	0.459267	NA
hsa-mir-125b-1_6739	105.607	0.478376	0.646697	0.739722	0.459469	0.999015
hsa-mir-126_133141	28.7441	-0.723833	0.978522	-0.739721	0.459469	NA
hsa-mir-29c_353435	11.3411	0.928648	1.25567	0.739562	0.459566	NA
hsa-mir-181a-2_271230	22.1122	-0.536169	0.725281	-0.739257	0.459751	NA
PAQR5-201_42882	33.6297	1.02612	1.38837	0.739082	0.459857	0.999015
hsa-mir-221_195748	26.4654	-0.768936	1.04051	-0.738996	0.459909	NA
tRNA-Glu-TTC-2-2_368151	19.0677	-1.32596	1.79592	-0.738321	0.460319	NA
RNY4P7-201_301831	58.861	1.05334	1.427	0.738151	0.460423	0.999282
hsa-mir-146a_243769	14.9868	-0.802933	1.08995	-0.736667	0.461325	NA
hsa-mir-150_346055	21.2911	0.64365	0.873742	0.736659	0.46133	NA
RNY3-201_358120	28.1847	1.0292	1.39987	0.735212	0.46221	NA
hsa-mir-15b_24034	14.6725	-0.987893	1.34398	-0.735052	0.462308	NA
hsa-mir-589_353717	37.3466	0.518008	0.705024	0.734739	0.462498	0.999745
hsa-mir-12136_149940	8.26942	0.945127	1.28825	0.733651	0.463162	NA
hsa-mir-3184_6446	11.8897	0.806898	1.10041	0.733271	0.463393	NA
hsa-let-7b_257038	12.7345	-0.899561	1.22696	-0.733163	0.463459	NA
hsa-mir-155_121977	316.09	0.270648	0.369711	0.732054	0.464136	0.999745
RNY3-201_155951	63.4044	1.05363	1.43942	0.731985	0.464178	0.999745
ENST00000465244.1_273307	12.7718	-1.0572	1.44435	-0.731954	0.464196	NA
hsa-let-7c_77183	107.389	0.351062	0.479915	0.731509	0.464469	0.999745
hsa-mir-320a_243093	124.413	-0.597216	0.817067	-0.730927	0.464824	0.999745
hsa_piR_015249|gb|DQ590830|Homo_sapiens_121389	23.3156	0.738019	1.01321	0.728398	0.46637	NA
hsa-mir-378a_388523	45.0039	-0.368268	0.50574	-0.728176	0.466506	0.999745
RNY4P7-201_167560	26.8207	0.992202	1.3637	0.727581	0.46687	NA
hsa-mir-150_5049	24.2155	0.564538	0.775915	0.727576	0.466873	NA
hsa-mir-29c_236693	12.9855	0.583282	0.802198	0.727104	0.467162	NA
hsa-mir-363_293854	11.933	0.873632	1.20263	0.726433	0.467574	NA
tRNA-Glu-CTC-1-7_102180	48.4011	0.412868	0.568769	0.725897	0.467902	0.999745
hsa-mir-199a-1_135505	22.4724	-0.381775	0.526208	-0.725522	0.468132	NA
hsa-mir-122b_179495	64.5063	-0.652787	0.90227	-0.723494	0.469377	0.999745
RNY4-201_135528	23.867	1.1581	1.60232	0.722767	0.469823	NA
RNY4-201_122745	46.2396	1.18584	1.6411	0.722584	0.469935	0.999745
hsa-mir-191_223343	38.5934	0.370431	0.512805	0.722363	0.470072	0.999745
RNY4P7-201_322772	289.567	1.16797	1.61742	0.722119	0.470221	0.999745
CTB-25B13.1-003_296738	30.5886	0.842752	1.16735	0.721934	0.470335	0.999745
RP11-203J14.1-001_88152	41.7658	-0.757242	1.05065	-0.720735	0.471073	0.999745
hsa-mir-151a_61495	51.4958	0.344748	0.478376	0.720664	0.471116	0.999745
hsa-mir-3184_165903	26.4039	0.523843	0.727931	0.719633	0.471751	NA
hsa-mir-24-2_159701	8886.49	-0.190676	0.26506	-0.719372	0.471912	0.999745
RP11-317N8.1-001_181822	34.3196	-0.573517	0.798349	-0.718379	0.472524	0.999745
tRNA-Pro-TGG-1-1_9944	23.2275	1.14191	1.59017	0.718106	0.472692	NA
tRNA-Leu-CAG-1-7_311317	10.7366	0.917937	1.27848	0.717993	0.472762	NA
hsa-mir-942_296302	40.4023	-0.572008	0.797781	-0.716999	0.473375	0.999745
hsa-mir-140_60891	15.5973	-0.8074	1.12841	-0.715523	0.474286	NA
RP11-192K2.3-014_336706	21.2473	0.924782	1.29353	0.714927	0.474654	NA
hsa-mir-877_5653	23.2088	0.595011	0.832278	0.714919	0.474659	NA
hsa-mir-24-2_190898	626.898	0.182612	0.255621	0.714386	0.474989	0.999745
hsa-let-7a-1_165002	17.5155	-0.81458	1.14088	-0.713991	0.475233	NA
RP3-481F12.6-001_16984	3577.12	-0.355765	0.499078	-0.712845	0.475942	0.999745
RNY4P16-201_367529	36.3962	0.617386	0.866321	0.712653	0.476061	0.999745
hsa-mir-361_210751	42.9746	-0.321075	0.450631	-0.712501	0.476155	0.999745
RNY4P10-201_265734	18.2966	0.973991	1.36978	0.711057	0.477049	NA
tRNA-Thr-TGT-2-1_308309	11.4728	0.79051	1.11175	0.711049	0.477054	NA
hsa-mir-126_333323	19.9276	0.338128	0.475674	0.710839	0.477184	NA
AC005944.1-004_269129	12.2539	-1.00473	1.41474	-0.710182	0.477591	NA
hsa-mir-339_142965	304.588	-0.283954	0.400849	-0.70838	0.478709	0.999745
hsa-mir-146b_208063	70.9074	-0.40563	0.572918	-0.708008	0.47894	0.999745
RNY4P14-201_127365	94.4228	1.10492	1.56068	0.707973	0.478962	0.999745
hsa-mir-92a-1_262441	19.7263	0.424825	0.600508	0.707443	0.479291	NA
hsa-mir-324_302482	93.8578	-0.568	0.803077	-0.707281	0.479392	0.999745
hsa-mir-30d_52856	32.1684	-0.427456	0.604404	-0.707235	0.47942	0.999745
hsa-mir-101-1_176225	34.4159	-0.673538	0.9528	-0.706904	0.479626	0.999745
hsa-mir-181a-2_376829	3858.71	-0.189349	0.268717	-0.704642	0.481033	0.999745
hsa-mir-98_146843	18.0652	-0.422641	0.599904	-0.704514	0.481113	NA
hsa-mir-195_4600	102.897	0.380034	0.539434	0.704505	0.481118	0.999745
hsa-mir-24-2_316019	916.281	0.202496	0.287568	0.704169	0.481328	0.999745
hsa-mir-584_2011	17.5686	-0.449617	0.640705	-0.701754	0.482833	NA
hsa-mir-3615_88305	16.5452	-0.709121	1.0107	-0.701612	0.482921	NA
hsa-mir-486-2_34183	22.6934	-0.524115	0.747035	-0.701594	0.482933	NA
hsa-mir-143_256394	1703.42	-0.368654	0.525609	-0.701385	0.483063	0.999745
hsa-mir-223_130986	78.2176	0.299528	0.42724	0.701077	0.483255	0.999745
hsa-mir-140_109124	31.2933	0.705446	1.00654	0.700861	0.48339	0.999745
hsa-mir-143_72095	30.2804	-0.438657	0.627235	-0.699351	0.484333	0.999745
hsa-mir-339_359493	29.4639	-0.561677	0.803423	-0.699104	0.484487	NA
RNY4P10-201_347988	23.7298	1.08214	1.55188	0.697309	0.485609	NA
hsa-mir-143_190018	167.45	-0.440029	0.631696	-0.696583	0.486064	0.999745
hsa-mir-6852_280926	53.724	0.395823	0.568594	0.696143	0.486339	0.999745
RNY4P10-201_76417	31.698	0.996501	1.43193	0.695915	0.486482	0.999745
hsa-let-7i_83171	15.6031	0.641315	0.921602	0.69587	0.48651	NA
ENST00000500358.6_27491	153.935	0.837754	1.20421	0.695685	0.486626	0.999745
hsa-mir-378a_335037	352.455	0.343179	0.493498	0.695401	0.486804	0.999745
hsa-mir-95_211780	47.3068	0.434429	0.625783	0.694217	0.487546	0.999745
hsa-mir-320a_383011	319.555	-0.478755	0.69	-0.693848	0.487778	0.999745
tRNA-Glu-CTC-1-7_41741	30.2789	-0.394184	0.56855	-0.693316	0.488112	0.999745
hsa-mir-27b_352234	16.9067	0.373992	0.53958	0.693117	0.488236	NA
hsa-mir-26b_227170	2097.92	-0.279338	0.403301	-0.69263	0.488542	0.999745
hsa-mir-342_300376	37.5641	-0.591034	0.853452	-0.692521	0.48861	0.999745
RNY4P10-201_299239	54.7589	0.984773	1.42267	0.692203	0.48881	0.999745
hsa_piR_016659|gb|DQ592932|Homo_sapiens_314449	16.6533	0.600709	0.868321	0.691805	0.48906	NA
hsa-mir-320a_15078	14.9248	0.628303	0.908514	0.691572	0.489206	NA
hsa-mir-21_156477	26.1761	0.634438	0.918756	0.690541	0.489854	NA
RNY4P27-201_363523	26.8041	0.947671	1.37519	0.689118	0.490749	NA
hsa-mir-185_180760	15.8695	0.735695	1.06789	0.688926	0.49087	NA
hsa-mir-28_371107	30.8374	0.511613	0.74283	0.688735	0.49099	0.999745
hsa_piR_020326|gb|DQ597916|Homo_sapiens_204722	69.2184	-0.72033	1.04655	-0.688289	0.491271	0.999745
hsa-mir-320a_199857	396.218	-0.301976	0.438857	-0.688096	0.491392	0.999745
hsa-mir-1307_62707	69.9763	-0.346578	0.503894	-0.6878	0.491579	0.999745
RNY4-201_374278	56.547	1.14532	1.6668	0.687141	0.491994	0.999745
hsa-mir-30e_20641	375.191	0.271054	0.394471	0.687132	0.491999	0.999745
ENST00000387459.1_67257	171.256	1.26399	1.84242	0.686048	0.492683	0.999745
hsa-mir-126_152960	378.695	-0.235169	0.343202	-0.685219	0.493206	0.999745
hsa-mir-29a_127262	20.3777	0.627145	0.916893	0.683989	0.493982	NA
hsa-mir-320a_59398	34.378	0.307153	0.449413	0.683453	0.494321	0.999745
hsa-mir-21_295217	22283.8	-0.186903	0.273535	-0.683288	0.494425	0.999745
hsa-mir-4433a_311899	26.2144	0.652732	0.955636	0.683034	0.494585	NA
RP11-694I15.3-003_122763	75.6575	-0.67113	0.982672	-0.682964	0.49463	0.999745
hsa-let-7a-1_88584	15.3669	-0.77201	1.13056	-0.682858	0.494697	NA
hsa-mir-3184_130604	16.5772	-0.832723	1.22015	-0.682475	0.494939	NA
hsa-let-7i_235261	22.4585	-0.676142	0.990789	-0.682428	0.494968	NA
RNY1-201_135799	10.1862	-1.04061	1.52599	-0.681925	0.495286	NA
RNY3-201_304933	78.3503	0.988141	1.45218	0.680454	0.496217	0.999745
RP11-215L17.2-001_145449	53.4957	1.14779	1.68883	0.679637	0.496735	0.999745
ENST00000390880.2_256084	10.8778	0.777989	1.1451	0.679407	0.49688	NA
hsa-mir-378a_152632	82.4411	0.437978	0.645381	0.678635	0.497369	0.999745
RNY4P10-201_153683	663.289	-0.371674	0.547712	-0.678594	0.497395	0.999745
hsa-mir-27b_190106	1405.91	-0.234322	0.345538	-0.678136	0.497685	0.999745
RNY4P20-201_191518	130.199	1.03448	1.53106	0.675665	0.499254	0.999745
RP3-481F12.6-001_388160	25.7012	-0.484412	0.717013	-0.675597	0.499296	NA
hsa-mir-425_160545	19.374	-0.347678	0.514815	-0.675345	0.499457	NA
CTB-54O9.4-002_111388	69.3404	0.938572	1.39012	0.675172	0.499567	0.999745
RNY4-201_308824	27.4992	1.16693	1.72903	0.674904	0.499737	NA
hsa-let-7b_242853	1932.49	-0.333295	0.494063	-0.674601	0.499929	0.999745
hsa-mir-223_285165	192.283	-0.21726	0.322555	-0.673562	0.50059	0.999745
hsa-let-7g_346937	13.2879	-0.543864	0.807635	-0.673403	0.500691	NA
ENST00000410794.1_39082	34.2198	0.673947	1.00167	0.672827	0.501057	0.999745
hsa-mir-93_16140	122.845	0.247987	0.369061	0.671941	0.501621	0.999745
hsa-mir-339_123896	71.1372	0.384967	0.573314	0.671477	0.501917	0.999745
hsa-mir-28_82976	788.21	0.190896	0.284306	0.671445	0.501937	0.999745
RNY3-201_370067	54.6364	0.986075	1.46871	0.671389	0.501973	0.999745
hsa-mir-181b-2_110912	315.255	-0.24156	0.360024	-0.670955	0.502249	0.999745
hsa-mir-92a-1_115314	17.9842	0.576436	0.859202	0.670896	0.502287	NA
hsa-mir-106b_33071	39.6146	0.587989	0.876428	0.670893	0.502289	0.999745
RP11-317N8.1-001_13767	16.1267	0.888517	1.32553	0.670311	0.502659	NA
hsa-mir-132_50628	122.838	-0.306345	0.458126	-0.668693	0.503691	0.999745
hsa-mir-1843_369799	11.5455	0.698133	1.04474	0.668239	0.503981	NA
hsa-mir-28_321994	304.376	-0.170472	0.255118	-0.668207	0.504002	0.999745
tRNA-Ser-GCT-6-1_373174	119.937	0.175315	0.262499	0.667868	0.504218	0.999745
hsa_piR_018570|gb|DQ595536|Homo_sapiens_336204	14.4516	-0.642273	0.9621	-0.667574	0.504405	NA
ENST00000387449.1_245131	16.7966	0.750035	1.12387	0.667365	0.504539	NA
ENST00000467525.5_281150	11.0609	0.67337	1.00946	0.667057	0.504736	NA
hsa-mir-148a_328640	68.3168	-0.445441	0.668218	-0.666611	0.505021	0.999745
hsa-mir-495_188734	108.382	-0.578299	0.868204	-0.666087	0.505356	0.999745
hsa-mir-339_377918	34.6232	0.574998	0.863553	0.665852	0.505506	0.999745
hsa-mir-20b_196044	10.5379	-0.879603	1.32341	-0.664647	0.506276	NA
hsa-mir-126_100268	18.6426	0.623964	0.940891	0.663163	0.507226	NA
hsa-let-7a-3_90374	15.75	-0.7796	1.17603	-0.662908	0.507389	NA
tRNA-Glu-CTC-1-1_267530	93.7363	1.07013	1.61482	0.662696	0.507525	0.999745
RNY4P28-201_177293	198.891	1.0658	1.60952	0.662182	0.507855	0.999745
hsa-mir-92a-1_211180	134.235	-0.423223	0.63922	-0.662092	0.507912	0.999745
RNY4-201_150104	105.35	-0.50629	0.764933	-0.661876	0.508051	0.999745
hsa-mir-425_300239	11.5624	0.353628	0.534467	0.661646	0.508198	NA
tRNA-Leu-CAG-2-2_54636	16.5773	-0.743329	1.12407	-0.661282	0.508432	NA
hsa-mir-126_69651	11.7837	0.293812	0.444314	0.661272	0.508438	NA
hsa-mir-21_97706	13.9842	-0.781637	1.18235	-0.661086	0.508557	NA
RNY4P10-201_150537	41.5761	-0.594872	0.900285	-0.66076	0.508766	0.999745
hsa-mir-877_306277	28.02	-0.576046	0.871825	-0.660736	0.508782	NA
hsa-mir-320c-1_389181	124.02	-0.570844	0.863959	-0.660731	0.508785	0.999745
hsa-mir-20a_333730	104.415	-0.282313	0.427348	-0.660617	0.508858	0.999745
AL157871.1-002_388138	26.1452	-0.793646	1.20154	-0.660522	0.508919	NA
hsa-mir-30e_18661	144.809	0.339045	0.513299	0.660521	0.50892	0.999745
RP1-287G14.6-008_106291	20.2993	-0.709739	1.07663	-0.659222	0.509753	NA
RP11-752G15.5-002_116907	8.48919	-0.625174	0.949628	-0.658336	0.510322	NA
AC004098.3-005_4065	21.4371	0.755621	1.14808	0.658162	0.510434	NA
hsa-mir-144_17506	96.9964	-0.485881	0.738402	-0.658017	0.510527	0.999745
RNY4P10-201_149024	76.6001	-0.324959	0.493943	-0.657888	0.51061	0.999745
ENST00000387441.1_143128	38.2624	-0.747411	1.13711	-0.657287	0.510996	0.999745
ENST00000387449.1_188183	43.5595	1.15171	1.7534	0.656847	0.511279	0.999745
hsa-mir-485_131406	20.805	-0.583283	0.888279	-0.656644	0.51141	NA
hsa-mir-199a-1_45639	311.905	-0.274831	0.418836	-0.656178	0.51171	0.999745
RNY4P10-201_201208	260.76	1.05628	1.61006	0.656048	0.511793	0.999745
hsa-mir-625_63616	33.6026	-0.669859	1.02249	-0.655123	0.512388	0.999745
hsa-mir-30d_161360	11.7606	-0.375168	0.573434	-0.654247	0.512953	NA
RNY4P7-201_152699	136.996	1.01294	1.54848	0.654152	0.513014	0.999745
hsa-let-7b_94800	14.1177	-0.782331	1.19726	-0.653436	0.513475	NA
hsa-mir-3184_15621	29.3334	0.53523	0.819189	0.653366	0.51352	NA
hsa-let-7d_357309	34.2502	0.405604	0.621066	0.653077	0.513707	0.999745
hsa-mir-330_339617	19.4986	-0.474726	0.727109	-0.652895	0.513824	NA
hsa-mir-29a_72730	11.2104	-0.478524	0.733871	-0.652055	0.514366	NA
hsa-mir-27a_109698	11.8556	-0.758455	1.16325	-0.652015	0.514391	NA
RNY4P16-201_312063	397.679	-0.462765	0.710494	-0.651329	0.514834	0.999745
ENST00000635935.1_364217	30.1913	-0.86319	1.32546	-0.651237	0.514893	0.999745
hsa-mir-125a_298986	129.353	0.354518	0.544398	0.651212	0.51491	0.999745
hsa-mir-339_175839	16.2309	0.828478	1.2735	0.650555	0.515334	NA
RNY4P10-201_211144	70.7933	0.961315	1.47835	0.650263	0.515523	0.999745
hsa-mir-28_200405	1685.09	0.180359	0.277673	0.649537	0.515991	0.999745
hsa-mir-26a-2_238533	246.498	-0.320148	0.492932	-0.649477	0.51603	0.999745
hsa-let-7f-2_385909	12.5566	-0.32203	0.495951	-0.649318	0.516133	NA
ENST00000387441.1_210775	18.06	0.644545	0.993053	0.649054	0.516304	NA
hsa-let-7a-3_50647	17.0241	-0.75185	1.15947	-0.648442	0.516699	NA
hsa-mir-152_243687	74.0523	-0.495247	0.76414	-0.648111	0.516913	0.999745
RNY4P10-201_211476	17.382	0.871567	1.34497	0.64802	0.516972	NA
hsa-mir-181b-2_233302	244.033	-0.188505	0.291042	-0.64769	0.517185	0.999745
hsa-mir-93_241697	117.283	-0.267989	0.414097	-0.647165	0.517525	0.999745
hsa-mir-103b-1_35272	18.8082	-0.630686	0.976149	-0.646096	0.518217	NA
hsa-mir-29a_270128	154.398	0.300545	0.465299	0.645918	0.518332	0.999745
hsa-mir-4433a_103896	19.1867	-0.591482	0.916396	-0.645443	0.51864	NA
RNY3P2-201_269549	85.3066	0.979747	1.51928	0.644876	0.519007	0.999745
RNY4P10-201_151847	181.419	1.02863	1.59702	0.644095	0.519514	0.999745
RP11-846F4.3-001_245475	16.1999	-0.682001	1.05927	-0.64384	0.519679	NA
RP11-645N11.2-002_141411	21.4213	0.544346	0.845598	0.643741	0.519743	NA
RNY4P20-201_252201	268.541	1.03876	1.61405	0.643575	0.519851	0.999745
hsa-mir-126_218646	6260.56	-0.146639	0.228066	-0.642969	0.520244	0.999745
hsa-mir-26b_219101	14.7916	0.333281	0.51888	0.642309	0.520673	NA
RP11-846F4.3-001_339743	34.8997	-0.589059	0.917885	-0.641757	0.521031	0.999745
hsa-mir-10b_166392	97.5618	0.361996	0.564107	0.641716	0.521058	0.999745
RNY4P20-201_320344	144.505	1.05681	1.64693	0.641686	0.521077	0.999745
hsa-mir-486-2_367000	1167.16	-0.226415	0.352998	-0.641407	0.521258	0.999745
hsa-mir-223_211261	9.41681	-0.682958	1.06492	-0.641323	0.521313	NA
hsa-mir-16-1_217120	379.174	0.335489	0.523147	0.64129	0.521334	0.999745
hsa-mir-370_373699	19.9939	-0.839463	1.31118	-0.640236	0.522019	NA
hsa-mir-30e_260937	31.4828	-0.616006	0.962534	-0.639984	0.522183	0.999745
hsa-let-7b_71612	59.6566	0.338964	0.529945	0.639621	0.522419	0.999745
hsa-mir-589_201048	13.237	0.665606	1.04103	0.639373	0.52258	NA
tRNA-Pro-TGG-1-1_313115	443.194	0.687669	1.07598	0.639107	0.522754	0.999745
ENST00000445125.2_49511	17.1883	0.987303	1.5469	0.638244	0.523315	NA
hsa-mir-28_73278	466.939	-0.264475	0.415246	-0.636911	0.524183	0.999745
ENST00000387456.1_179571	17.1685	0.629428	0.989123	0.63635	0.524548	NA
hsa-mir-361_293249	17.1357	-0.6582	1.03435	-0.636339	0.524555	NA
hsa-mir-148a_24725	82.0511	-0.538214	0.845798	-0.636339	0.524556	0.999745
RNY4P10-201_384185	401.174	1.0704	1.68401	0.635623	0.525022	0.999745
ENST00000387342.1_380800	1185.54	1.12306	1.76827	0.635119	0.525351	0.999745
hsa-mir-150_101784	13.9836	0.331625	0.523987	0.632888	0.526807	NA
hsa-mir-486-2_42573	10.5939	0.611524	0.966911	0.632451	0.527092	NA
hsa-mir-26a-2_245676	24.5182	0.699779	1.10758	0.631811	0.527511	NA
hsa-mir-22_7338	14.5968	-0.617067	0.97679	-0.63173	0.527563	NA
hsa-mir-92a-1_15745	30.9022	0.580821	0.919502	0.631669	0.527603	0.999745
RP3-481F12.6-001_924	18.835	0.661295	1.04752	0.631293	0.527849	NA
tRNA-Glu-TTC-2-2_240958	32.9499	-0.456241	0.723408	-0.630683	0.528248	0.999745
hsa-mir-320a_205118	9.96341	0.559178	0.886701	0.630628	0.528284	NA
CTB-54O9.4-002_266013	18.0557	-0.924162	1.4657	-0.630528	0.528349	NA
hsa-mir-130b_92768	135.624	-0.392627	0.6227	-0.630523	0.528353	0.999745
hsa-mir-130b_154977	30.6353	-0.469356	0.744463	-0.630464	0.528391	0.999745
RNY4P27-201_131478	14.8949	-0.88593	1.40729	-0.629529	0.529003	NA
hsa-let-7e_218969	46.1862	0.455973	0.724374	0.629472	0.52904	0.999745
hsa-mir-148a_40664	321.489	0.452515	0.719298	0.629106	0.52928	0.999745
RNY1-201_317416	295.835	0.996167	1.5851	0.628457	0.529704	0.999745
tRNA-Pro-TGG-3-1_356299	51.5866	0.910512	1.45063	0.627665	0.530223	0.999745
hsa-mir-1296_56308	39.7211	-0.326078	0.519973	-0.627106	0.53059	0.999745
hsa-mir-16-1_100089	1636.88	0.211283	0.337295	0.626404	0.53105	0.999745
hsa-mir-146a_29401	20.9289	-0.655804	1.04732	-0.626177	0.531199	NA
RNY4P7-201_87610	43.2731	0.941902	1.50545	0.625661	0.531537	0.999745
RNY4-201_201168	30.1491	1.04554	1.67119	0.625628	0.531559	0.999745
hsa-mir-223_98661	14.743	-0.305395	0.488196	-0.625558	0.531605	NA
RNY4P20-201_264772	49.5227	-1.29483	2.07117	-0.625171	0.531859	0.999745
hsa-mir-200b_18137	7.70176	0.78715	1.25923	0.625103	0.531903	NA
hsa-let-7d_254033	25.8621	0.488894	0.782193	0.62503	0.531952	NA
hsa-mir-18a_8080	43.35	0.577693	0.92506	0.624492	0.532304	0.999745
hsa-mir-146b_134051	57.5074	1.04022	1.66577	0.62447	0.532319	0.999745
RNY4-201_53172	30.9126	0.88353	1.41718	0.62344	0.532995	0.999745
ENST00000445125.2_325351	15.5129	-0.94202	1.51446	-0.622017	0.53393	NA
hsa_piR_018569|gb|DQ595533|Homo_sapiens_257148	1722.78	1.03528	1.66531	0.621673	0.534157	0.999745
hsa-let-7i_270119	2034.08	-0.328131	0.528113	-0.621328	0.534384	0.999745
hsa-mir-654_370409	578.513	-0.411329	0.662843	-0.620553	0.534894	0.999745
hsa-let-7g_388387	568.973	0.251226	0.404853	0.620537	0.534904	0.999745
hsa-mir-486-2_348346	91.1107	-0.247154	0.398511	-0.620193	0.535131	0.999745
RNY4-201_285839	30.5404	1.01615	1.63854	0.620158	0.535154	0.999745
hsa-mir-28_182090	237.051	0.260656	0.420557	0.619789	0.535397	0.999745
RP11-312N17.3-003_321823	25.1313	0.390716	0.631288	0.618918	0.53597	NA
ENST00000387460.2_180918	15.2475	-0.569922	0.92097	-0.618828	0.536029	NA
hsa_piR_019420|gb|DQ596670|Homo_sapiens_119128	38.6043	0.636108	1.02815	0.61869	0.536121	0.999745
hsa-mir-584_112832	45.5879	-0.306649	0.495725	-0.618586	0.536189	0.999745
hsa-let-7i_219058	12.4736	-0.71108	1.14997	-0.618347	0.536347	NA
hsa-mir-342_304317	383.441	0.20004	0.323562	0.618245	0.536414	0.999745
ENST00000362433.1_39567	13.7939	-0.587805	0.951013	-0.618083	0.53652	NA
hsa-mir-652_192221	111.399	-0.312194	0.505175	-0.617991	0.536581	0.999745
hsa-mir-25_69758	36.3058	-0.313101	0.506817	-0.617778	0.536722	0.999745
hsa-mir-486-2_23675	2732.41	0.326856	0.529407	0.617401	0.53697	0.999745
ENST00000387461.2_217952	15.2686	0.623935	1.01064	0.617365	0.536994	NA
ENST00000362433.1_320768	109.829	0.92217	1.49409	0.617212	0.537095	0.999745
RNY4P10-201_265056	130.29	0.928598	1.50531	0.616881	0.537313	0.999745
RP11-18O13.1-001_840	34.7907	0.792626	1.28622	0.616246	0.537732	0.999745
RP11-469L3.1-001_69701	15.9812	0.835656	1.35849	0.615138	0.538464	NA
tRNA-Glu-TTC-2-2_364445	24.3108	1.00049	1.62768	0.614671	0.538772	NA
ENST00000362330.2_229058	87.4604	0.964066	1.56924	0.614353	0.538982	0.999745
hsa-mir-4433a_166366	103.29	-0.648853	1.0566	-0.614097	0.539151	0.999745
hsa-mir-134_182031	24.9211	0.691106	1.12545	0.614069	0.53917	NA
ENST00000387460.2_237844	44.3116	1.03133	1.68132	0.613407	0.539607	0.999745
RNY3-201_76128	98.1964	0.971334	1.58378	0.613301	0.539677	0.999745
hsa-mir-6741_100105	57.0588	-0.249402	0.407316	-0.612305	0.540336	0.999745
hsa-mir-3184_298331	50.4431	-0.558883	0.913041	-0.612111	0.540464	0.999745
hsa-mir-126_263440	19.4724	-0.459657	0.751033	-0.612033	0.540516	NA
hsa-mir-324_228147	17.0952	0.73225	1.1965	0.611991	0.540543	NA
hsa-mir-1180_16301	16.1842	0.864077	1.41238	0.61179	0.540677	NA
hsa-mir-130b_114433	30.631	0.284725	0.465615	0.611503	0.540867	0.999745
RNY4P10-201_8098	11.7988	0.51426	0.841191	0.611348	0.540969	NA
hsa_piR_017723|gb|DQ594464|Homo_sapiens_204595	13.8865	0.745377	1.2199	0.611017	0.541188	NA
RNY3-201_379743	56.1446	-0.789848	1.29355	-0.610605	0.541461	0.999745
hsa-let-7a-1_251316	15.4287	0.466494	0.764236	0.610405	0.541594	NA
RP11-227B21.1-001_198814	16.2043	-0.839447	1.37529	-0.610377	0.541612	NA
RP11-846F4.3-001_3177	139.427	0.933756	1.53101	0.609894	0.541932	0.999745
hsa-let-7b_74869	24.9947	-0.535855	0.880002	-0.608925	0.542574	NA
hsa-mir-584_72613	41.0488	-0.618048	1.01508	-0.608864	0.542615	0.999745
hsa-let-7g_92501	34.1394	-0.400966	0.658844	-0.60859	0.542797	0.999745
hsa-mir-26a-2_79868	14.9336	0.578071	0.949927	0.608542	0.542828	NA
hsa-mir-126_265758	106.434	0.306333	0.503449	0.608469	0.542877	0.999745
hsa-mir-320c-1_74673	71.5371	-0.27463	0.451802	-0.607855	0.543284	0.999745
hsa-mir-146a_180513	29.0861	-0.54878	0.903068	-0.607684	0.543397	NA
hsa-mir-127_362514	11.4444	-0.810173	1.33405	-0.607303	0.54365	NA
hsa-mir-6842_240623	12.0025	0.546082	0.899439	0.607137	0.54376	NA
hsa-let-7a-3_119603	46.2831	-0.598778	0.98735	-0.60645	0.544216	0.999745
hsa-mir-10527_99884	55.1241	-0.263627	0.434711	-0.606441	0.544222	0.999745
hsa-let-7a-1_169708	12.7133	-0.335694	0.553557	-0.606431	0.544229	NA
hsa-mir-26b_256763	14.9907	-0.698959	1.15279	-0.606322	0.544301	NA
RP13-554M15.1-001_37777	29.3139	-0.958792	1.58133	-0.60632	0.544302	NA
RNY4P10-201_380206	516.775	1.13971	1.88078	0.60598	0.544528	0.999745
AC040162.22-012_118933	43.7225	0.944047	1.55845	0.605759	0.544675	0.999745
ENST00000387342.1_155659	582.178	1.02163	1.68772	0.605328	0.544961	0.999745
hsa-mir-769_354947	23.8205	-0.658472	1.08889	-0.604718	0.545366	NA
RNY4P3-201_326627	16.5864	0.82804	1.3696	0.604586	0.545454	NA
hsa-mir-126_160718	461.755	0.237544	0.393345	0.603908	0.545905	0.999745
hsa-mir-146a_242798	21.0579	0.509837	0.846276	0.602448	0.546876	NA
hsa-let-7d_383741	262.601	-0.247803	0.411428	-0.6023	0.546974	0.999745
hsa-mir-486-2_20750	1081.53	0.325365	0.540462	0.602013	0.547166	0.999745
hsa-mir-30d_153843	101.34	-0.373426	0.622133	-0.600235	0.548349	0.999745
hsa-mir-576_317512	30.2237	0.613776	1.02498	0.598818	0.549294	0.999745
hsa-mir-486-2_10941	749.726	-0.259562	0.43352	-0.598731	0.549352	0.999745
hsa-mir-664a_148043	22.86	0.674781	1.12779	0.59832	0.549627	NA
hsa-mir-378a_3239	34.5905	0.746499	1.24816	0.598081	0.549786	0.999745
hsa-mir-182_301389	71.8629	0.297424	0.497314	0.598061	0.549799	0.999745
RNY4P10-201_226502	31.8761	0.839446	1.40472	0.59759	0.550114	0.999745
hsa-let-7b_315318	19.8891	-0.274368	0.459471	-0.597139	0.550415	NA
hsa-mir-221_98005	105.263	0.406096	0.681297	0.596064	0.551133	0.999745
hsa-let-7a-1_207520	50.0549	-0.429237	0.720875	-0.59544	0.55155	0.999745
hsa-mir-942_151088	74.1055	0.208431	0.350058	0.595418	0.551564	0.999745
hsa-mir-106a_275306	23.8559	-0.240751	0.404429	-0.595287	0.551652	NA
tRNA-Gly-GCC-5-1_150138	4766.47	1.09833	1.84676	0.594736	0.55202	0.999745
hsa-mir-143_137405	203.227	-0.302103	0.508016	-0.594672	0.552063	0.999745
hsa-mir-223_336348	24.8501	-0.194773	0.32764	-0.594472	0.552196	NA
hsa-mir-26a-2_222570	707.938	-0.233719	0.393718	-0.593621	0.552765	0.999745
hsa-mir-486-2_354484	30.4161	0.729636	1.22931	0.593534	0.552824	0.999745
RP11-317N8.1-001_8685	36.7596	0.697706	1.17616	0.593204	0.553044	0.999745
RNY4P9-201_368197	134.763	0.922676	1.5569	0.592639	0.553423	0.999745
RNY4P20-201_129263	197216	1.24697	2.1078	0.591597	0.554121	0.999745
hsa-mir-378a_212659	19.3938	-0.607095	1.02644	-0.591457	0.554214	NA
RNY4P20-201_182889	192.609	0.963707	1.63019	0.591163	0.554411	0.999745
CTB-61I7.2-001_175888	122.686	-0.370736	0.627665	-0.59066	0.554748	0.999745
hsa-mir-140_340239	237.277	0.249595	0.423122	0.58989	0.555264	0.999745
hsa-mir-627_70228	12.5023	0.742505	1.26034	0.58913	0.555774	NA
hsa-mir-199a-1_296212	15.4983	0.580216	0.985986	0.588462	0.556222	NA
RP1-179N16.4-001_32479	15.7262	-0.772524	1.31282	-0.588447	0.556232	NA
ENST00000362330.2_271794	205.44	0.939573	1.59831	0.587853	0.556631	0.999745
hsa-mir-146a_337050	22.8197	-0.384144	0.653725	-0.587623	0.556786	NA
RNY4P16-201_341055	38.8362	-0.581761	0.990519	-0.587329	0.556983	0.999745
RNY4P17-201_255709	389.896	0.972153	1.65539	0.587266	0.557025	0.999745
tRNA-Val-CAC-3-1_188680	29.7257	1.00309	1.7114	0.586122	0.557793	0.999745
ENST00000363120.1_344251	14.2569	-0.66713	1.13955	-0.585434	0.558256	NA
hsa-mir-3184_139086	69.1175	-0.197313	0.337366	-0.584864	0.558639	0.999745
hsa-mir-222_139762	15.7675	-0.373554	0.639133	-0.58447	0.558904	NA
RNY4-201_288334	22.2498	1.09585	1.87562	0.58426	0.559045	NA
ENST00000410794.1_351499	43.6528	0.669323	1.1475	0.583286	0.559701	0.999745
tRNA-Pro-TGG-3-1_19120	48.2378	0.750992	1.28771	0.5832	0.559759	0.999745
RNY3-201_292802	38.3058	0.932523	1.59984	0.582886	0.55997	0.999745
hsa-mir-409_150512	42.6143	-0.680796	1.16823	-0.582757	0.560057	0.999745
hsa-mir-454_231703	53.6816	-0.481579	0.826412	-0.582735	0.560072	0.999745
hsa-mir-3173_257585	13.7503	0.737724	1.26597	0.582733	0.560073	NA
hsa-mir-30e_78394	353.502	0.252344	0.433106	0.582638	0.560137	0.999745
ENST00000387459.1_259004	89.2	-0.46956	0.806412	-0.582283	0.560376	0.999745
hsa-mir-27b_309462	21.5297	0.546452	0.938647	0.58217	0.560452	NA
RNY4P27-201_47852	20.1156	0.807138	1.38784	0.581577	0.560852	NA
hsa-let-7b_174912	18.9251	-0.27707	0.476836	-0.581058	0.561201	NA
hsa-mir-25_105343	8.12816	-0.636808	1.09732	-0.58033	0.561692	NA
hsa-mir-1908_284186	36.6006	0.423597	0.730023	0.580252	0.561745	0.999745
RP3-481F12.6-001_141227	32.7208	0.7167	1.23575	0.579973	0.561933	0.999745
hsa-mir-664a_114326	107.079	0.279447	0.482393	0.579294	0.562391	0.999745
hsa-mir-335_241675	24.2104	-0.529352	0.914138	-0.579072	0.562541	NA
ENST00000387377.1_385813	29.7834	0.961735	1.66097	0.57902	0.562576	0.999745
RNY4P16-201_349724	14.617	-0.752006	1.29916	-0.578839	0.562698	NA
hsa-let-7b_320155	249.867	-0.245508	0.42423	-0.578713	0.562783	0.999745
hsa-mir-126_165887	20.8889	-0.23987	0.414688	-0.578433	0.562972	NA
hsa_piR_016677|gb|DQ592953|Homo_sapiens_291587	162.155	0.892743	1.54354	0.578373	0.563012	0.999745
hsa-let-7a-1_321544	27.6852	-0.417154	0.72192	-0.577839	0.563373	NA
hsa-let-7b_21060	13.2024	-0.327919	0.567691	-0.577636	0.56351	NA
hsa-mir-1908_174035	10.8407	-0.689344	1.19342	-0.577619	0.563522	NA
hsa-mir-25_8981	34.5945	0.510557	0.884489	0.577233	0.563782	0.999745
RNY4P7-201_14080	36.0773	0.80606	1.39828	0.576467	0.5643	0.999745
hsa-let-7f-2_67899	61.7146	0.255231	0.442901	0.576271	0.564432	0.999745
hsa-mir-199a-1_17100	16.3183	0.646971	1.12291	0.576154	0.564511	NA
hsa-let-7a-1_275362	176.645	0.200816	0.348731	0.575847	0.564719	0.999745
hsa-mir-199a-1_215076	256.467	-0.372366	0.646703	-0.575791	0.564757	0.999745
tRNA-Pro-TGG-1-1_321592	43.8438	0.775437	1.34676	0.575779	0.564765	0.999745
RP11-317N8.1-001_185862	51.4235	0.677138	1.17709	0.575265	0.565112	0.999745
hsa-mir-4446_331416	34.4664	-0.563182	0.979716	-0.574842	0.565398	0.999745
RNY3P2-201_132129	47.1736	-0.701756	1.22156	-0.574475	0.565646	0.999745
ENST00000500358.6_164855	57.4029	0.713785	1.24262	0.574417	0.565685	0.999745
RNY4-201_332930	106.924	0.915837	1.59486	0.574244	0.565803	0.999745
hsa-mir-486-2_50017	67.0305	-0.310629	0.541014	-0.57416	0.565859	0.999745
ENST00000387347.2_231913	58.5044	1.00955	1.75902	0.573926	0.566018	0.999745
hsa_piR_004153|gb|DQ575660|Homo_sapiens_11330	219.175	0.903589	1.57579	0.573421	0.56636	0.999745
RP11-317N8.1-001_201908	21.5034	-0.851106	1.48429	-0.57341	0.566367	NA
tRNA-Glu-CTC-1-1_8087	641.308	0.980707	1.71082	0.573239	0.566483	0.999745
RNY4P7-201_72111	132.687	0.894284	1.56064	0.573024	0.566628	0.999745
hsa-mir-146a_237856	20.0372	-0.331418	0.57912	-0.57228	0.567132	NA
hsa-mir-584_338271	43.5514	0.368189	0.644268	0.571485	0.567671	0.999745
hsa-mir-30c-2_276258	1650.26	-0.154166	0.269829	-0.571349	0.567763	0.999745
hsa_piR_020364|gb|DQ597971|Homo_sapiens_3466	9.0323	0.562378	0.984958	0.570967	0.568022	NA
RP11-694I15.3-003_251349	14.8617	0.714624	1.25294	0.570356	0.568436	NA
tRNA-Pro-TGG-1-1_181434	20.1495	0.897578	1.57446	0.570087	0.568619	NA
RP13-554M15.1-001_145841	47.2863	-0.862879	1.51405	-0.569914	0.568736	0.999745
hsa-mir-320a_189152	64.8683	-0.477397	0.837915	-0.569744	0.568852	0.999745
tRNA-Pro-TGG-1-1_94171	130.325	0.70219	1.23354	0.569246	0.569189	0.999745
ENST00000362433.1_16593	96.7646	0.852806	1.49932	0.568795	0.569496	0.999745
tRNA-Asp-GTC-3-1_166656	30.1712	-0.60995	1.07307	-0.568414	0.569754	0.999745
ENST00000467525.5_81295	209.802	0.36202	0.637349	0.56801	0.570028	0.999745
hsa-mir-369_57641	71.0911	-0.482632	0.849953	-0.567833	0.570148	0.999745
hsa-mir-181b-2_174010	39.2694	0.512615	0.902879	0.567756	0.5702	0.999745
hsa-mir-320a_1508	73.7452	-0.490678	0.864577	-0.567535	0.57035	0.999745
ENST00000387459.1_275461	562.583	1.12117	1.9822	0.565619	0.571653	0.999745
hsa-let-7f-2_373834	38.2905	-0.637192	1.12704	-0.565367	0.571824	0.999745
hsa-mir-3184_183763	5349.61	-0.133245	0.236318	-0.563837	0.572865	0.999745
ENST00000387342.1_197510	16.1528	0.427102	0.758213	0.563301	0.57323	NA
hsa-let-7b_223909	10928.6	-0.195985	0.348358	-0.562596	0.57371	0.999745
CTD-2644F13.1-001_227032	14.3486	0.670057	1.19515	0.560647	0.575038	NA
hsa-mir-425_2291	102.86	0.251651	0.448969	0.560509	0.575132	0.999745
hsa-mir-1273h_162654	15.1321	-0.524945	0.936822	-0.560346	0.575243	NA
hsa-mir-93_347099	13.3644	0.622514	1.11283	0.559399	0.575889	NA
hsa-let-7a-1_177168	39.4728	-0.25805	0.461849	-0.558733	0.576344	0.999745
hsa-mir-151a_255688	87.6211	-0.431626	0.772699	-0.558595	0.576438	0.999745
hsa-mir-320a_125173	34.869	0.566662	1.01518	0.558188	0.576716	0.999745
hsa-mir-186_209163	47.4907	-0.277334	0.497115	-0.557887	0.576922	0.999745
RNY4P10-201_33657	163.237	0.878635	1.57624	0.557424	0.577238	0.999745
hsa-mir-652_361496	17.7166	0.627539	1.12639	0.557123	0.577444	NA
RNY4P10-201_121679	9.50714	-0.711769	1.2781	-0.556897	0.577598	NA
hsa-mir-4433a_375244	44.7342	-1.12459	2.02043	-0.556609	0.577794	0.999745
hsa-mir-320c-1_309971	42.405	0.52978	0.952214	0.556366	0.577961	0.999745
hsa-mir-181a-2_292851	78.0549	-0.420008	0.755377	-0.556024	0.578194	0.999745
[truncated: 1,582 more rows]

## Sheet: control vs AD
	baseMean	log2FoldChange	lfcSE	stat	pvalue	padj
hsa-mir-125a_16373	538.445	1.90706	0.3439	5.54539	2.93293e-08	0.00010016
hsa-mir-191_20120	707.832	2.22466	0.416476	5.34163	9.21165e-08	0.000157289
hsa-mir-191_374673	47.4531	2.53095	0.502455	5.03717	4.72468e-07	0.000537826
hsa-mir-142_235814	950.247	0.785173	0.159	4.9382	7.88487e-07	0.000673171
hsa-mir-139_97503	59.438	1.32865	0.274275	4.84424	1.27097e-06	0.00086807
hsa-mir-23a_310408	581.7	1.43162	0.3079	4.64961	3.3256e-06	0.00189282
tRNA-Leu-TAG-1-1_351047	392.633	1.32909	0.28853	4.6064	4.09698e-06	0.00199874
ENST00000410794.1_314086	186.156	1.84135	0.409481	4.4968	6.89848e-06	0.0026245
hsa-mir-92a-1_77925	20.5106	1.96852	0.437816	4.49624	6.91669e-06	0.0026245
hsa-mir-191_253879	63.7738	1.67507	0.380102	4.40689	1.04866e-05	0.00358117
tRNA-Leu-CAG-2-2_309767	130.252	1.17754	0.270337	4.35582	1.32568e-05	0.00411562
hsa-mir-23a_199622	96.5725	1.42454	0.332426	4.28527	1.82519e-05	0.00473664
hsa-mir-27b_132733	99.5668	1.06066	0.247557	4.28452	1.83138e-05	0.00473664
RNY4-201_53290	1584.18	1.38798	0.324942	4.27148	1.94181e-05	0.00473664
RNY4P7-201_268722	87.1973	2.87241	0.68072	4.21967	2.44664e-05	0.00557018
hsa-mir-150_12904	27.5213	1.53421	0.365834	4.19375	2.74384e-05	0.00585639
hsa_piR_015249|gb|DQ590830|Homo_sapiens_121389	32.5602	1.77098	0.424335	4.17355	2.99894e-05	0.00602435
RNY3-201_80001	22.7465	1.71202	0.411756	4.15786	3.21248e-05	0.00604738
hsa-mir-99a_189990	75.8377	1.43185	0.346169	4.13629	3.5297e-05	0.00604738
RNY4P7-201_79305	427.546	3.10962	0.752709	4.13124	3.60811e-05	0.00604738
hsa-mir-22_249460	100.988	0.967708	0.234776	4.12183	3.75879e-05	0.00604738
hsa-mir-191_74716	39.5379	2.14826	0.522237	4.11357	3.89582e-05	0.00604738
hsa-mir-23a_282670	1148.24	1.11733	0.274793	4.06609	4.78088e-05	0.00709857
hsa-mir-342_290655	278.15	1.29794	0.323926	4.0069	6.15214e-05	0.00845001
hsa-mir-10a_44529	904.026	0.838237	0.209266	4.0056	6.18595e-05	0.00845001
RP11-727F15.8-001_247531	74.1852	1.7506	0.440064	3.97806	6.94793e-05	0.00912584
hsa-mir-23a_68435	49.5598	1.7533	0.447448	3.91846	8.9118e-05	0.0112718
hsa-mir-146a_25522	3686.66	-0.535794	0.137602	-3.89381	9.86822e-05	0.0118558
RNY4P10-201_103899	1467.22	2.97639	0.765346	3.88895	0.000100679	0.0118558
hsa-mir-363_105467	35.2799	1.22918	0.321864	3.81894	0.000134025	0.0152565
hsa-mir-99b_362070	77.5996	1.19687	0.316755	3.77855	0.000157744	0.0173773
hsa-mir-150_119626	65.2754	1.13508	0.303392	3.7413	0.000183071	0.0195371
RNY4-201_46538	57.3632	2.39542	0.644409	3.71724	0.000201411	0.0202112
hsa-mir-29c_243024	24.4337	1.15193	0.310287	3.71248	0.000205241	0.0202112
hsa-mir-486-2_305222	382.802	0.859935	0.231779	3.71014	0.000207142	0.0202112
tRNA-Leu-TAG-1-1_361255	24.6077	1.3658	0.371692	3.67456	0.000238262	0.0219548
hsa-mir-342_304317	522.312	0.81702	0.223067	3.66266	0.000249609	0.0219548
RP11-227B21.1-001_315293	31.5188	2.13497	0.583716	3.65755	0.000254633	0.0219548
hsa-mir-10b_300404	148.775	1.12745	0.308281	3.65722	0.000254969	0.0219548
RNY4-201_92446	72.8416	1.12279	0.307191	3.65502	0.000257158	0.0219548
hsa-mir-451b_95918	23.0288	1.24197	0.342291	3.6284	0.000285183	0.0237536
hsa-mir-744_344834	167.354	-0.580081	0.160251	-3.61984	0.00029479	0.0238543
RNY4P7-201_190326	93.5918	2.45108	0.678034	3.61499	0.000300362	0.0238543
hsa-mir-142_55632	21.4582	1.24993	0.346464	3.60766	0.000308969	0.0239802
hsa-mir-10b_12801	308.583	0.989914	0.278891	3.54946	0.000386016	0.0292943
hsa-mir-99a_324028	59.5769	1.38748	0.392172	3.53793	0.000403278	0.029939
hsa-mir-363_293854	26.783	1.26033	0.36274	3.47447	0.000511871	0.0367898
hsa-mir-92a-2_236612	66.0078	1.07243	0.308903	3.47174	0.000517103	0.0367898
SMC1A-202_275705	38.1225	1.85533	0.5386	3.44474	0.000571619	0.038535
hsa-mir-30d_82143	992.376	0.460717	0.133792	3.44354	0.000574143	0.038535
hsa-mir-223_66968	26.3386	-0.431134	0.125224	-3.44291	0.000575486	0.038535
hsa-mir-3184_244505	79.6268	1.00264	0.292135	3.43212	0.000598892	0.0393311
hsa-mir-150_361602	77.0498	1.04215	0.305036	3.41647	0.000634396	0.0407744
hsa-mir-320a_186451	54.9797	-1.27351	0.373239	-3.41206	0.000644749	0.0407744
hsa-mir-330_145504	22.6817	-1.30626	0.383904	-3.40257	0.000667564	0.0414497
ENST00000540957.1_194067	38.7758	-1.02062	0.300645	-3.39477	0.000686871	0.0415168
hsa-mir-486-2_24765	397.211	0.715717	0.21098	3.39235	0.000692959	0.0415168
hsa-mir-139_239740	45.0087	0.895496	0.264371	3.38726	0.000705936	0.041565
hsa-mir-324_376540	18.3178	1.19111	0.352278	3.38116	0.000721818	0.0417798
RNY4-201_139615	87.3049	1.3592	0.404741	3.35819	0.000784536	0.0445944
hsa-mir-150_346055	32.2133	1.08976	0.324915	3.35399	0.000796562	0.0445944
hsa-let-7b_47738	571.708	0.574141	0.171762	3.34265	0.000829821	0.0457071
ENST00000445125.2_208216	130.923	1.21828	0.36678	3.32156	0.000895158	0.0479339
hsa-mir-342_28467	442.295	0.653827	0.196902	3.32058	0.000898322	0.0479339
hsa-mir-484_271349	51.0709	0.695749	0.210657	3.30275	0.000957421	0.0497308
RNY4P10-201_165553	64.1567	2.29241	0.694318	3.30167	0.000961122	0.0497308
hsa-mir-92a-2_186498	54.385	1.67989	0.51057	3.29023	0.00100104	0.0510232
hsa-mir-195_3764	27.7542	0.943703	0.287894	3.27795	0.00104562	0.0520749
hsa-mir-27a_343656	24.1945	1.07292	0.327737	3.27373	0.00106137	0.0520749
hsa-mir-223_125617	2185.27	-0.395337	0.12082	-3.27213	0.00106742	0.0520749
hsa-mir-451b_380114	17.1226	1.2486	0.38212	3.26756	0.00108478	0.0521762
RNY4P23-201_292258	133.703	1.24084	0.381391	3.25348	0.00114003	0.053849
hsa-mir-30a_14752	92.1537	0.673372	0.207152	3.25061	0.00115156	0.053849
tRNA-Glu-TTC-1-2_225755	22.7638	1.50221	0.46319	3.24319	0.00118199	0.053849
RP11-752G15.5-002_70492	330.966	-0.581976	0.179464	-3.24286	0.00118336	0.053849
ENST00000365448.1_96188	81.9019	1.22981	0.379838	3.23771	0.00120492	0.053849
hsa-mir-95_211780	57.5733	1.01407	0.313417	3.23553	0.00121416	0.053849
hsa-mir-29a_127262	27.2006	0.932486	0.289941	3.21613	0.00129933	0.0568875
hsa-mir-451b_117475	37.0765	1.27159	0.397188	3.20147	0.00136728	0.0582473
hsa-mir-1301_137162	17.2083	1.4645	0.458052	3.19723	0.00138753	0.0582473
hsa-let-7b_117482	21.1571	1.62222	0.508187	3.19217	0.0014121	0.0582473
hsa-mir-30a_286113	235.503	0.802967	0.251653	3.19077	0.00141895	0.0582473
hsa-mir-451b_373012	122.674	1.14733	0.359736	3.18936	0.00142589	0.0582473
RP11-317N8.1-001_8685	33.9229	1.12947	0.354473	3.18634	0.00144086	0.0582473
hsa-mir-30a_70438	52.7917	0.904639	0.284082	3.18443	0.00145039	0.0582473
RNY3-201_111402	35.7575	1.5456	0.485982	3.18036	0.00147091	0.0582473
RNY4P10-201_337666	145.776	2.05716	0.64735	3.17781	0.0014839	0.0582473
hsa-mir-451b_295282	17351.3	0.999846	0.315837	3.1657	0.0015471	0.0590626
hsa-mir-223_244059	357.833	-0.697011	0.220327	-3.16354	0.00155865	0.0590626
hsa-mir-23a_246903	74.0242	1.05256	0.333068	3.16018	0.0015767	0.0590626
hsa-let-7f-2_67899	71.6877	0.843391	0.266926	3.15964	0.00157965	0.0590626
RP11-694I15.3-003_251349	28.6468	1.82413	0.577708	3.15753	0.00159114	0.0590626
hsa-mir-150_267228	78.6028	1.04525	0.332133	3.14709	0.00164902	0.0605528
hsa-mir-10b_163854	175.368	0.889125	0.283124	3.14041	0.00168711	0.0612923
hsa-mir-223_285165	197.939	-0.446748	0.142588	-3.13313	0.0017295	0.0616455
hsa-mir-30c-2_109025	29.8041	0.98461	0.314316	3.13255	0.00173293	0.0616455
hsa-mir-10b_190341	42.6964	1.15737	0.370122	3.12699	0.00176605	0.062176
hsa-mir-3184_170600	24.5294	1.25108	0.40133	3.11734	0.0018249	0.0635923
hsa-let-7d_351699	1132.79	-0.769438	0.247856	-3.10438	0.00190677	0.065774
hsa-mir-320a_218042	153.542	-0.867689	0.280375	-3.09474	0.00196985	0.0672704
hsa-mir-25_222963	23.824	0.803089	0.260437	3.08362	0.002045	0.0691453
hsa_piR_009295|gb|DQ582567|Homo_sapiens_64163	44.9315	1.86236	0.60584	3.07402	0.00211198	0.07071
hsa-mir-223_11016	19996.3	-0.341548	0.111945	-3.05102	0.00228062	0.0754721
hsa-mir-139_15057	63.508	0.962837	0.316099	3.046	0.00231907	0.0754721
hsa-mir-98_181750	118.155	-0.784388	0.257677	-3.04407	0.00233397	0.0754721
tRNA-Val-TAC-2-1_94795	18.6527	1.39955	0.45993	3.04296	0.00234262	0.0754721
RNY4-201_333477	36.2778	1.23454	0.406834	3.0345	0.00240932	0.0768957
RNY1-201_51470	30.973	1.85284	0.613134	3.02191	0.00251183	0.0788712
hsa-let-7d_275847	1617.65	-0.408209	0.135324	-3.01652	0.00255695	0.0788712
hsa-mir-30d_292268	596.548	0.405749	0.134681	3.01268	0.00258954	0.0788712
hsa_piR_009295|gb|DQ582567|Homo_sapiens_158852	412.059	2.64308	0.877783	3.01108	0.00260318	0.0788712
hsa-mir-17_141595	152.837	-0.574836	0.190987	-3.00982	0.00261402	0.0788712
hsa-mir-93_87314	5414.99	-0.44154	0.146818	-3.0074	0.00263494	0.0788712
hsa_piR_016658|gb|DQ592931|Homo_sapiens_267799	115.991	-0.922057	0.306707	-3.00631	0.00264438	0.0788712
hsa-mir-125b-1_317477	52.4622	0.739433	0.246194	3.00346	0.00266929	0.0788712
hsa-mir-30d_131142	1349.38	0.474835	0.158155	3.00235	0.00267908	0.0788712
hsa-mir-744_297711	1146.2	-0.456676	0.152355	-2.99744	0.00272254	0.0793637
hsa-mir-320a_377219	3370.44	-0.617794	0.206258	-2.99524	0.00274229	0.0793637
tRNA-Pro-TGG-1-1_9944	24.3082	1.54627	0.518818	2.98037	0.00287896	0.0814976
hsa-mir-486-2_352405	60.2897	0.872522	0.292838	2.97953	0.00288687	0.0814976
hsa-mir-222_137871	185.167	0.424108	0.142344	2.97946	0.00288762	0.0814976
hsa-let-7d_338544	407.635	-0.637854	0.214279	-2.97675	0.00291322	0.0815464
hsa-mir-425_121535	77.8489	0.595177	0.20039	2.97009	0.00297711	0.0826572
hsa-mir-486-2_10941	837.933	-0.465283	0.157029	-2.96304	0.00304615	0.0836463
hsa-mir-150_14738	16.1454	1.17438	0.396552	2.96147	0.00306172	0.0836463
RP1-179N16.4-001_379289	38.4315	1.44691	0.489943	2.95323	0.00314468	0.0845328
tRNA-Gly-CCC-2-2_164921	56.9346	1.79826	0.609435	2.95071	0.00317046	0.0845328
RP11-694I15.3-003_228850	72.2413	1.54251	0.522798	2.95049	0.00317274	0.0845328
hsa-mir-451b_262653	39.081	1.29147	0.438008	2.9485	0.00319318	0.0845328
hsa-mir-486-2_201671	14.2248	1.16234	0.394413	2.94702	0.00320849	NA
hsa-let-7b_154028	18.1658	1.16846	0.397172	2.94195	0.00326151	0.0856773
hsa-mir-29a_340338	367.201	0.590954	0.201406	2.93415	0.00334466	0.0867992
hsa-let-7b_319125	179.957	0.642265	0.219128	2.93101	0.00337861	0.0867992
hsa-mir-10b_252256	97.3901	0.914577	0.312053	2.93084	0.00338047	0.0867992
hsa-mir-140_122707	137.906	0.666979	0.228023	2.92505	0.00344403	0.0871566
hsa-mir-210_93088	48.089	-0.886143	0.303003	-2.92454	0.00344967	0.0871566
hsa-mir-200c_81015	89.7591	-0.450687	0.154206	-2.92262	0.00347095	0.0871566
RP11-247I13.2-005_177688	27.5308	1.51797	0.521106	2.91297	0.00358004	0.0892398
RNY4P7-201_38656	50.2781	1.75893	0.605061	2.90703	0.00364883	0.0902952
hsa-mir-99b_125450	728.431	0.659563	0.227082	2.90452	0.00367817	0.0903666
RP11-469L3.1-001_60872	27.7231	1.32548	0.458424	2.89138	0.00383555	0.092335
RP11-18O13.1-004_115585	76.7723	1.19637	0.414223	2.88821	0.00387439	0.092335
hsa_piR_019914|gb|DQ597347|Homo_sapiens_254916	29.597	2.00082	0.692988	2.88723	0.00388645	0.092335
hsa-mir-30a_107952	79.5151	0.739384	0.25615	2.88653	0.0038952	0.092335
hsa-mir-10b_254995	3670.67	0.799913	0.277149	2.88622	0.00389904	0.092335
RNY4P10-201_100072	147.625	1.87286	0.649518	2.88346	0.00393329	0.092335
hsa-mir-21_231528	17.6269	-0.529622	0.183749	-2.88232	0.00394756	0.092335
hsa-mir-486-2_327529	319.314	-0.447802	0.155485	-2.88003	0.00397633	0.0923754
hsa-mir-4433a_375976	21.9894	-1.12718	0.392384	-2.87265	0.00407039	0.0939215
hsa-mir-92a-1_278263	37.6261	1.01063	0.352126	2.87006	0.0041039	0.0940592
hsa-mir-98_98498	338.286	-0.780028	0.272348	-2.86409	0.00418211	0.0950621
hsa-mir-22_284493	55.4035	0.896543	0.313204	2.86249	0.00420333	0.0950621
hsa-mir-486-2_319215	94.9561	-0.612748	0.214435	-2.8575	0.00426996	0.0958815
hsa-let-7d_189652	7422.65	-0.567492	0.198823	-2.85425	0.00431381	0.0958815
hsa-mir-10b_113391	63.979	0.870423	0.305035	2.85352	0.00432379	0.0958815
RNY4P7-201_352456	108.201	1.78542	0.626705	2.8489	0.00438713	0.0963997
hsa-mir-146a_387114	288.168	-0.466721	0.163894	-2.8477	0.00440362	0.0963997
hsa-mir-10b_40203	79.6303	0.916861	0.322532	2.8427	0.00447338	0.0973031
hsa-mir-26b_254081	81.5707	0.419824	0.148266	2.83156	0.00463218	0.0990917
RNY4-201_325012	16.3959	1.11471	0.393738	2.8311	0.00463887	0.0990917
hsa-mir-92a-1_389272	25.7832	1.13649	0.401467	2.83084	0.00464266	0.0990917
hsa-mir-30d_52856	47.0309	0.661989	0.234162	2.82706	0.00469774	0.0993043
hsa-mir-3615_27665	18.7535	1.12291	0.397768	2.82302	0.00475733	0.0993043
hsa-mir-425_389306	736.141	-0.422876	0.149834	-2.82231	0.00476794	0.0993043
RNY4P10-201_299239	113.238	1.68282	0.597177	2.81795	0.00483311	0.0993043
RNY4P10-201_380206	521.382	2.02668	0.719504	2.81677	0.0048509	0.0993043
hsa-mir-106b_194035	114.442	-0.57187	0.203073	-2.81609	0.00486126	0.0993043
RP11-694I15.3-001_387798	123.132	1.48205	0.526481	2.81502	0.00487745	0.0993043
hsa-mir-486-2_34183	31.5467	-0.650211	0.231021	-2.8145	0.00488525	0.0993043
hsa-mir-486-2_49054	274.477	0.539558	0.191922	2.81135	0.00493347	0.0996911
hsa-mir-1246_279549	43.8114	1.09052	0.388414	2.80761	0.00499101	0.100261
hsa-let-7b_12323	45.742	0.972618	0.347976	2.79507	0.00518879	0.103342
RP11-317N8.1-001_286209	99.8083	0.927996	0.332131	2.79407	0.00520491	0.103342
hsa-mir-361_123477	33.199	1.14972	0.412766	2.78541	0.00534606	0.105531
hsa-mir-320a_329546	22.1037	-1.17362	0.422976	-2.77468	0.00552563	0.108448
hsa-mir-106b_99152	29.0543	0.843382	0.304661	2.76827	0.00563551	0.109209
hsa-let-7i_270119	2717.54	-0.602905	0.217925	-2.76657	0.00566488	0.109209
hsa-mir-30d_386110	118.843	0.408222	0.147587	2.76597	0.00567536	0.109209
ENST00000445125.2_159455	23.4037	1.27146	0.459841	2.765	0.00569232	0.109209
hsa-mir-328_355682	128.033	-0.437903	0.158637	-2.7604	0.00577309	0.110007
hsa-mir-199a-1_192709	373.219	-0.483407	0.175213	-2.75897	0.00579833	0.110007
hsa-let-7b_71612	72.8632	0.600184	0.217734	2.7565	0.0058423	0.110074
hsa-mir-92a-1_53276	18.0112	1.10097	0.399603	2.75516	0.00586629	0.110074
hsa-let-7c_115512	41.1453	0.575839	0.209355	2.75054	0.00594966	0.111028
hsa-mir-10a_148343	134.785	0.786571	0.286535	2.74511	0.00604899	0.111968
hsa-mir-10a_151108	102.08	0.740983	0.270017	2.74421	0.00606562	0.111968
hsa-mir-155_311817	576.787	0.362112	0.132323	2.73658	0.00620824	0.112938
hsa-mir-1307_183568	411.482	-0.462008	0.168859	-2.73605	0.00621807	0.112938
hsa-mir-125a_134980	401.068	0.768461	0.280877	2.73593	0.00622036	0.112938
hsa-mir-150_351511	547.694	0.728432	0.266401	2.73435	0.00625044	0.112938
RNY4P10-201_328904	48.4099	1.65183	0.604706	2.73163	0.00630212	0.113272
hsa-mir-30c-2_322632	257.574	0.683583	0.25053	2.72854	0.00636145	0.113516
RNY4P7-201_92968	162.836	1.92705	0.706534	2.72747	0.00638218	0.113516
hsa-mir-150_154997	389.709	0.72097	0.264859	2.72209	0.00648705	0.114784
hsa-mir-10a_360093	65.1383	0.715082	0.263111	2.7178	0.00657184	0.115223
hsa-mir-17_386691	859.145	-0.468316	0.172339	-2.71742	0.00657937	0.115223
hsa_piR_020485|gb|DQ598159|Homo_sapiens_374276	65.0697	0.915172	0.337535	2.71134	0.00670112	0.11528
hsa-mir-126_45281	618.072	0.525637	0.193915	2.71065	0.00671516	0.11528
RNY4P23-201_300108	303.559	0.8673	0.320176	2.70882	0.00675221	0.11528
AL135747.3-003_47627	17.6962	-0.874447	0.323223	-2.7054	0.00682229	0.11528
hsa-mir-361_3222	104.902	0.646659	0.239072	2.70487	0.00683301	0.11528
hsa-mir-29a_212590	53.6135	0.624163	0.23081	2.70422	0.00684641	0.11528
RP11-694I15.3-003_255096	146.794	1.36329	0.504905	2.7001	0.00693189	0.11528
hsa-mir-1908_147927	87.3351	-0.595284	0.220591	-2.69859	0.00696334	0.11528
hsa-mir-197_52583	71.6207	0.419273	0.155395	2.69811	0.00697354	0.11528
hsa-mir-29a_350967	71.2262	0.626239	0.232291	2.69593	0.00701928	0.11528
hsa_piR_020485|gb|DQ598159|Homo_sapiens_53759	137.62	0.621387	0.230502	2.6958	0.00702202	0.11528
hsa-let-7i_347742	22.5804	0.95405	0.353976	2.69524	0.00703378	0.11528
hsa-mir-103b-1_145429	1169.02	-0.324873	0.120544	-2.69505	0.00703777	0.11528
RNY4P10-201_152325	91.432	2.17023	0.805513	2.69423	0.00705522	0.11528
hsa-mir-92a-1_211180	158.94	0.842859	0.313115	2.69185	0.00710563	0.115551
ENST00000445125.2_247065	44.9057	1.21955	0.453742	2.68776	0.00719339	0.115798
hsa-mir-10a_169639	248.391	0.702688	0.261813	2.68393	0.00727624	0.115798
hsa-mir-101-1_145885	27.1469	0.906985	0.337956	2.68374	0.00728041	0.115798
hsa-let-7b_231475	33.5571	0.786343	0.293027	2.68352	0.00728513	0.115798
hsa-let-7a-1_245625	158.761	0.660534	0.246166	2.68328	0.00729037	0.115798
RP11-752G15.5-002_248882	23.4948	-1.14038	0.425355	-2.68101	0.00734002	0.116047
ENST00000464816.1_171001	24.5305	1.21124	0.454099	2.66734	0.00764549	0.119917
ENST00000445125.2_17369	54.3701	1.40499	0.526865	2.6667	0.00765994	0.119917
RP11-752G15.5-002_350775	886.395	-0.460183	0.172653	-2.66536	0.00769057	0.119917
hsa-mir-21_66709	58.781	-0.630665	0.236887	-2.6623	0.00776086	0.119917
RNY4-201_113992	42.1586	0.952726	0.357918	2.66185	0.00777117	0.119917
tRNA-Glu-CTC-1-1_388873	56.8287	1.56781	0.589223	2.6608	0.00779548	0.119917
hsa-mir-1307_62707	69.08	-0.591334	0.222877	-2.65319	0.00797349	0.121717
hsa-mir-320a_161578	639.798	-0.591294	0.223012	-2.6514	0.00801589	0.121717
RNY1-201_196932	59.4955	1.48127	0.558707	2.65125	0.00801942	0.121717
hsa-let-7b_239309	21.1073	0.929976	0.351026	2.64931	0.00806567	0.121877
ENST00000390880.2_125502	109.298	-0.667501	0.252122	-2.64753	0.00810824	0.121981
tRNA-Val-CAC-3-1_66062	68.4696	1.605	0.608359	2.63824	0.00833377	0.124756
hsa-mir-27a_74623	530.268	0.394612	0.149648	2.63694	0.00836576	0.124756
RNY4P10-201_296114	35.1612	1.48755	0.565744	2.62937	0.00855443	0.125833
hsa-mir-106b_119634	66.2715	-0.747637	0.284348	-2.6293	0.00855605	0.125833
hsa-mir-320a_307805	36.4384	-0.846463	0.322103	-2.62793	0.00859058	0.125833
hsa-mir-139_108018	189.332	0.648584	0.246904	2.62687	0.0086174	0.125833
hsa-mir-27b_262655	22.6411	0.991399	0.377434	2.62668	0.0086222	0.125833
RNY4P23-201_12592	621.953	0.801774	0.306147	2.61892	0.00882092	0.127882
hsa-let-7g_327171	75.4694	0.45752	0.174741	2.61828	0.00883753	0.127882
RNY4P10-201_123772	42.2908	1.49857	0.573838	2.61148	0.00901502	0.12948
hsa-let-7i_24180	162.945	0.566228	0.216875	2.61085	0.00903182	0.12948
RNY4-201_221171	159.712	-0.594648	0.227859	-2.60972	0.00906167	0.12948
hsa-let-7b_313571	656.355	0.633613	0.243058	2.60684	0.00913831	0.129521
hsa-mir-484_136842	1525.19	0.342937	0.131557	2.60676	0.00914043	0.129521
hsa-mir-320a_199857	420.32	-0.438799	0.168501	-2.60413	0.00921089	0.12978
hsa-let-7b_270323	32.1952	0.977029	0.375425	2.60246	0.00925565	0.12978
hsa-mir-223_72592	16.3119	-0.738364	0.283786	-2.60183	0.00927274	0.12978
hsa-mir-484_82267	159.028	0.68894	0.26498	2.59997	0.00932327	0.129885
hsa-mir-150_212412	36.6448	0.903888	0.347991	2.59744	0.00939205	0.129885
RNY4P10-201_154025	2264.64	1.87694	0.722715	2.59706	0.00940248	0.129885
hsa-mir-190a_128649	26.7219	-1.10262	0.424744	-2.59597	0.00943235	0.129885
hsa-mir-3184_264669	15.1134	1.14678	0.442091	2.594	0.0094867	NA
RNY1-201_320329	138.388	0.860664	0.331873	2.59336	0.00950445	0.130352
hsa-mir-222_250888	24.3034	0.747216	0.288699	2.58822	0.00964742	0.131784
hsa-let-7a-1_155068	15.1155	1.14018	0.440626	2.58763	0.00966388	NA
RNY4P27-201_256085	54.2604	1.42003	0.550433	2.57983	0.00988485	0.134311
hsa-mir-584_274588	15.9506	-0.82911	0.321495	-2.57892	0.00991108	0.134311
RNY4-201_372350	130.646	-0.517747	0.200941	-2.57662	0.00997714	0.134672
hsa-mir-342_307315	183.961	0.719064	0.279317	2.57436	0.0100425	0.134687
RNY4P10-201_40823	723.54	0.550031	0.213801	2.57263	0.0100928	0.134687
hsa-mir-142_88238	41.7913	0.78727	0.30611	2.57185	0.0101157	0.134687
hsa-mir-30c-2_301270	60.4628	0.644984	0.250854	2.57115	0.010136	0.134687
hsa-mir-26b_16349	31.5355	0.629381	0.244919	2.56975	0.0101772	0.13471
RNY4P10-201_43053	13.4979	1.30628	0.50873	2.56773	0.0102367	NA
hsa-mir-584_2011	14.106	-0.951081	0.37068	-2.56577	0.0102946	NA
hsa-mir-150_80110	1190.39	0.688684	0.268437	2.56553	0.0103018	0.135157
RNY4P7-201_3984	37.7638	1.43794	0.560617	2.56492	0.01032	0.135157
hsa-mir-744_80783	16.3151	-0.72863	0.284235	-2.56348	0.0103629	0.135157
tRNA-Gly-CCC-1-1_16018	168.763	1.58046	0.616583	2.56326	0.0103693	0.135157
hsa-let-7f-1_231804	69.3098	-0.671731	0.262578	-2.55821	0.0105211	0.135945
hsa-mir-320a_151590	456.551	-0.495998	0.193895	-2.55808	0.0105253	0.135945
hsa-mir-10b_166392	118.909	0.826157	0.323152	2.55655	0.0105715	0.135945
hsa-mir-93_198675	552.265	-0.688682	0.269705	-2.55347	0.0106656	0.135945
hsa-mir-29c_375181	17.6704	0.854851	0.334947	2.55219	0.0107047	0.135945
hsa_piR_016659|gb|DQ592932|Homo_sapiens_197917	147.829	-0.490096	0.192087	-2.55143	0.0107282	0.135945
hsa-mir-425_84590	88.0263	-0.572123	0.224335	-2.55031	0.0107627	0.135945
hsa-mir-3184_161589	47.3012	0.581912	0.228192	2.5501	0.0107691	0.135945
hsa-mir-99b_233957	64.9311	0.82758	0.324606	2.54949	0.010788	0.135945
hsa-mir-652_1558	71.4114	0.587047	0.230665	2.54502	0.0109271	0.137192
hsa-mir-320a_109808	246.577	-0.464785	0.182748	-2.54331	0.0109807	0.13736
ENST00000387421.1_285086	14.485	-0.965946	0.380422	-2.53914	0.0111124	NA
hsa-let-7g_98120	34.4162	-0.499694	0.196831	-2.53869	0.0111269	0.138367
tRNA-Glu-CTC-1-1_233136	28.328	1.44338	0.568661	2.5382	0.0111423	0.138367
hsa-mir-222_216660	41.0148	0.655905	0.258668	2.53571	0.0112221	0.138367
hsa-mir-329-1_252558	33.9238	0.945028	0.372694	2.53567	0.0112233	0.138367
RNY4P10-201_272401	20.5928	1.32612	0.524004	2.53074	0.0113823	0.139822
tRNA-Glu-CTC-1-7_129216	43.9519	1.3467	0.535421	2.51522	0.0118959	0.145094
hsa-mir-30d_261676	190.191	0.592324	0.235527	2.51488	0.0119072	0.145094
RP11-317N8.1-001_334567	187.144	0.751881	0.299179	2.51315	0.011966	0.145094
RP11-694I15.3-001_88136	43.6197	1.46996	0.585082	2.5124	0.0119914	0.145094
hsa-mir-342_179583	18.9865	0.952442	0.379273	2.51123	0.0120311	0.145094
hsa-mir-21_84532	50.2843	-0.437651	0.174349	-2.5102	0.0120664	0.145094
hsa-mir-26a-2_383359	42.8972	0.804691	0.32102	2.50667	0.0121873	0.146034
hsa-mir-140_122744	119.717	0.617855	0.246761	2.50386	0.0122846	0.146293
hsa-mir-26b_16105	176.74	-0.488652	0.195182	-2.50357	0.0122946	0.146293
RP11-694I15.3-003_122763	107.439	1.41044	0.564002	2.50076	0.0123926	0.146948
RNY4P7-201_356153	151.909	1.69475	0.678282	2.49859	0.0124688	0.147339
hsa-mir-26b_95108	15.528	-0.529693	0.212602	-2.49148	0.0127212	NA
hsa-mir-486-2_146579	33.639	0.699149	0.280739	2.49039	0.0127604	0.150264
hsa-mir-223_265602	67.4173	-0.69991	0.282014	-2.48183	0.0130709	0.152847
hsa-mir-29c_188400	78.868	0.67964	0.273935	2.48103	0.0131005	0.152847
hsa-mir-29a_291998	1593.46	0.331927	0.133806	2.48066	0.013114	0.152847
hsa-mir-486-2_271985	212.629	-0.395301	0.159674	-2.47568	0.0132982	0.153872
RNY4P7-201_340083	23.0216	1.40626	0.568132	2.47523	0.0133152	0.153872
ENST00000387461.2_217952	12.9363	-0.978265	0.395397	-2.47414	0.0133559	NA
RNY4-201_36466	345.845	0.712356	0.287945	2.47393	0.0133635	0.153872
hsa-mir-20a_87860	950.141	-0.48429	0.195912	-2.47198	0.0134368	0.153872
RNY4P7-201_87610	138.797	1.58446	0.641123	2.47138	0.0134592	0.153872
hsa-mir-140_334324	28.0986	0.658826	0.266699	2.4703	0.0134999	0.153872
hsa-let-7i_325262	17.7192	-0.904518	0.366225	-2.46984	0.0135173	0.153872
ENST00000464816.1_51623	163.82	1.35784	0.550479	2.46666	0.0136381	0.154731
hsa-mir-10b_103516	1222.46	0.696935	0.282688	2.46539	0.0136864	0.154766
hsa-mir-30a_288499	416.183	0.677091	0.274932	2.46275	0.0137875	0.155393
hsa-mir-125a_39152	1048.25	0.431624	0.17577	2.45562	0.014064	0.156262
hsa-let-7b_317272	668.239	0.497983	0.202814	2.45537	0.0140739	0.156262
hsa-mir-30a_150320	58.3857	0.730079	0.297437	2.45457	0.0141053	0.156262
hsa-mir-584_324307	1243.69	-0.450475	0.183533	-2.45447	0.0141094	0.156262
SMC1A-202_186134	181.76	1.28335	0.523788	2.45014	0.0142802	0.156262
hsa-mir-98_316343	3935.21	-0.565992	0.231027	-2.4499	0.0142895	0.156262
hsa-mir-155_15534	258.915	0.435276	0.177744	2.44889	0.0143299	0.156262
hsa-mir-26a-2_379023	6686.24	-0.42322	0.172888	-2.44795	0.0143672	0.156262
hsa-mir-320a_233026	43.7279	-0.458966	0.187504	-2.44776	0.0143748	0.156262
hsa-mir-486-2_354484	25.0351	1.02739	0.419811	2.44728	0.0143939	0.156262
hsa-mir-26a-2_231466	1043.41	-0.442015	0.180654	-2.44675	0.0144151	0.156262
hsa-mir-10b_381432	1529.94	0.697155	0.285363	2.44305	0.0145638	0.156262
hsa-mir-331_338442	98.6507	-0.379575	0.155424	-2.44219	0.0145983	0.156262
hsa-mir-1249_274136	144.681	-0.476139	0.194973	-2.44208	0.0146029	0.156262
hsa-mir-146a_180513	18.2007	-0.947608	0.388081	-2.44178	0.0146152	0.156262
ENST00000410794.1_87152	45.3213	0.995047	0.407722	2.44051	0.0146667	0.156262
hsa-mir-10399_128854	36.5099	-0.54038	0.221465	-2.44003	0.0146862	0.156262
RP11-192K2.3-014_72662	104.488	1.55871	0.638823	2.43998	0.0146881	0.156262
hsa-mir-223_340143	211.363	-0.431249	0.176906	-2.43773	0.0147799	0.156457
hsa-mir-451b_18787	5923.39	0.812156	0.333222	2.43728	0.0147982	0.156457
RNY4P10-201_97844	145.151	1.55547	0.638717	2.4353	0.0148796	0.156799
hsa-let-7i_288065	94.2697	-0.95625	0.39283	-2.43426	0.0149223	0.156799
hsa-mir-25_224288	1269.57	0.503526	0.207356	2.42832	0.015169	0.158902
RP11-849F2.1-001_182592	106.371	-0.469847	0.193748	-2.42504	0.0153068	0.159768
hsa-mir-17_34235	288.869	-0.651121	0.2686	-2.42413	0.0153452	0.159768
hsa-mir-181a-2_373050	54.8912	0.52337	0.216265	2.42004	0.0155186	0.161068
hsa-let-7b_279485	49.4169	0.724115	0.29953	2.41751	0.0156272	0.161068
hsa-mir-3184_159349	94.9339	0.387214	0.160179	2.41738	0.0156326	0.161068
RNY4P10-201_121679	15.7233	1.04299	0.431466	2.41733	0.015635	NA
RNY4P10-201_153683	1085.27	0.783623	0.32439	2.41568	0.0157059	0.161068
hsa-mir-222_360567	109.428	0.394298	0.163248	2.41533	0.015721	0.161068
AC015689.1-001_143202	50.5049	1.34177	0.555888	2.41375	0.0157894	0.161068
ENST00000500358.6_27491	150.295	1.27757	0.529347	2.41348	0.0158009	0.161068
tRNA-Glu-CTC-1-1_154090	354.506	1.58565	0.657535	2.41151	0.0158865	0.161068
ENST00000500358.6_119580	108.605	1.38029	0.572602	2.41056	0.015928	0.161068
ENST00000387409.1_314432	43.4819	-0.825777	0.342611	-2.41025	0.0159417	0.161068
hsa-mir-148b_329438	495.689	-0.46441	0.193025	-2.40596	0.0161301	0.162079
hsa-mir-181a-2_140600	904.275	0.34667	0.14411	2.40559	0.0161464	0.162079
hsa-mir-3184_355412	136.04	0.435247	0.180996	2.40474	0.0161842	0.162079
AC106782.9-001_125022	105.784	1.15605	0.481172	2.40258	0.0162801	0.162174
hsa-mir-425_174220	1497.54	-0.308986	0.128616	-2.40238	0.0162886	0.162174
RP11-694I15.3-001_326385	124.257	1.29127	0.537945	2.40038	0.0163781	0.162558
hsa-let-7f-2_52467	27.799	-0.562886	0.234595	-2.39939	0.0164224	0.162558
hsa-mir-4433a_119167	47.3653	-0.732214	0.305366	-2.39782	0.0164929	0.162576
hsa-mir-361_30784	17.2055	0.8827	0.368216	2.39723	0.0165194	0.162576
hsa-mir-26a-2_229542	67.3986	0.540174	0.225541	2.39501	0.0166199	0.163094
tRNA-Val-CAC-3-1_270892	39.4481	1.47617	0.616695	2.39368	0.0166803	0.163218
RP11-227B21.1-001_151550	45.4399	1.43021	0.598018	2.39158	0.0167758	0.16326
RP11-317N8.1-001_12390	33.4442	0.904352	0.378154	2.39149	0.0167802	0.16326
AC106782.9-001_268266	185.619	1.18396	0.495378	2.39002	0.0168474	0.163448
hsa-mir-340_9282	57.2777	-0.576912	0.241586	-2.38802	0.0169393	0.163875
hsa-mir-146a_336207	2242.62	-0.318743	0.133722	-2.38362	0.0171435	0.165382
hsa-mir-28_73278	469.7	-0.356364	0.149673	-2.38094	0.0172683	0.166116
hsa-let-7a-1_301188	177.134	0.541108	0.227731	2.37609	0.0174973	0.1676
hsa-mir-320a_220237	174.878	-0.622718	0.262131	-2.37559	0.0175208	0.1676
RNY4P10-201_314845	1907.3	1.69981	0.716636	2.37193	0.0176954	0.167828
hsa-mir-18a_235875	77.8772	-0.726875	0.306539	-2.37123	0.0177288	0.167828
hsa-mir-26a-2_184666	41.8507	-0.339185	0.143156	-2.36934	0.0178201	0.167828
hsa-mir-126_384889	17.5541	0.477553	0.201636	2.3684	0.0178654	0.167828
hsa-mir-21_129437	26874.5	-0.390579	0.164917	-2.36833	0.0178684	0.167828
hsa-mir-628_232448	36.3498	-0.916078	0.386803	-2.36833	0.0178686	0.167828
hsa-mir-126_160718	508.164	0.439178	0.18547	2.36792	0.0178885	0.167828
hsa-mir-3184_44557	22.3454	0.995383	0.421089	2.36383	0.018087	0.169225
hsa-mir-425_335408	20.9152	-0.813174	0.344191	-2.36256	0.018149	0.169289
hsa-mir-328_357042	984.236	-0.253598	0.107381	-2.36167	0.018193	0.169289
hsa-mir-142_225748	15.7786	0.791844	0.335354	2.36122	0.018215	NA
hsa-mir-30e_151355	81.7453	0.565613	0.239629	2.36037	0.0182567	0.16942
hsa-mir-484_202142	12.1008	0.807929	0.342429	2.35941	0.0183042	NA
ENST00000500358.6_53779	111.454	1.2502	0.530719	2.35567	0.0184892	0.171113
hsa-mir-223_336348	23.9067	-0.31625	0.13449	-2.35148	0.018699	0.171926
hsa-mir-98_266892	631.481	-0.463527	0.197137	-2.3513	0.0187081	0.171926
RNY4P10-201_156655	40.4064	1.28274	0.545939	2.3496	0.0187934	0.171926
hsa-mir-150_84914	8810.21	0.612479	0.26081	2.34837	0.0188557	0.171926
RNY1-201_346103	342.315	0.593458	0.252785	2.34768	0.0188907	0.171926
ENST00000449439.1_152365	31.1782	1.3387	0.570652	2.34592	0.0189803	0.171926
RP11-227B21.1-001_47126	74.5157	1.32418	0.564469	2.34589	0.0189816	0.171926
hsa-mir-451b_125517	30.8136	1.30163	0.554957	2.34545	0.019004	0.171926
hsa-mir-30e_265891	30.9238	0.735774	0.313807	2.34467	0.019044	0.171926
hsa-mir-486-2_297819	20.6335	0.638017	0.272336	2.34275	0.019142	0.171926
hsa-mir-4433a_297666	55.1817	0.808841	0.345444	2.34145	0.0192087	0.171926
hsa-let-7a-1_204893	29.1624	0.784927	0.335244	2.34136	0.0192137	0.171926
hsa-mir-223_348788	152.326	0.76189	0.325453	2.34101	0.0192315	0.171926
hsa-mir-26b_185583	477.806	-0.34074	0.145675	-2.33904	0.0193333	0.172384
RNY4P10-201_157181	20.0114	1.22275	0.523024	2.33785	0.0193951	0.172485
hsa-mir-21_216457	2286.78	-0.482577	0.206727	-2.33437	0.0195763	0.173645
AC004098.3-005_4065	35.7	1.25298	0.53729	2.33204	0.0196984	0.173719
hsa-mir-23a_196572	217.923	0.539052	0.231159	2.33196	0.019703	0.173719
hsa-mir-451b_173960	22.3254	0.806924	0.346125	2.3313	0.0197373	0.173719
hsa-let-7d_251956	46.5179	-0.567198	0.243445	-2.32989	0.0198122	0.17393
hsa-mir-3184_154377	13.1293	1.03385	0.443939	2.32882	0.0198686	NA
tRNA-Glu-CTC-1-7_266805	33.4498	1.29952	0.558051	2.32868	0.0198759	0.174042
hsa-mir-342_74532	28.2232	0.816946	0.351377	2.32498	0.0200728	0.175316
RNY4P24-201_248703	14.4319	1.18194	0.508691	2.3235	0.0201525	NA
hsa-mir-144_246958	70.4769	1.04713	0.450969	2.32195	0.0202354	0.176286
hsa-mir-22_311454	20.7804	0.954499	0.411444	2.31988	0.0203476	0.176812
RNY4P14-201_285430	68.6114	0.647719	0.279487	2.31753	0.020475	0.177118
hsa-mir-130a_13434	73.9585	-0.577394	0.249207	-2.31693	0.0205078	0.177118
hsa-mir-128-1_227737	96.075	0.610214	0.263464	2.31611	0.0205521	0.177118
tRNA-Glu-TTC-14-1_262131	16.8105	1.24793	0.538967	2.31541	0.0205903	0.177118
hsa-mir-148b_386145	12.067	-1.08088	0.466852	-2.31526	0.0205989	NA
hsa-mir-20a_106686	166.775	-0.715583	0.30922	-2.31415	0.0206594	0.177266
hsa_piR_019420|gb|DQ596670|Homo_sapiens_119128	38.5143	0.976197	0.423038	2.30759	0.0210222	0.179043
hsa-mir-151a_232266	772.332	-0.354739	0.153771	-2.30692	0.021059	0.179043
hsa-mir-584_32146	22.1926	-0.822407	0.35656	-2.3065	0.0210825	0.179043
hsa-mir-584_112832	54.9128	-0.457481	0.198351	-2.30642	0.0210874	0.179043
hsa-mir-29a_177349	17.0565	0.820904	0.356091	2.30532	0.0211487	0.179043
hsa-mir-576_15162	54.1533	0.824511	0.357854	2.30404	0.0212203	0.179043
hsa-mir-27a_188194	60.5191	0.521829	0.226572	2.30315	0.0212703	0.179043
RP11-846F4.3-001_383667	409.846	-0.566589	0.246112	-2.30216	0.0213263	0.179043
RNY4P18-201_205577	15.9836	-0.837951	0.364019	-2.30194	0.0213383	0.179043
hsa-mir-223_98661	13.6677	-0.436629	0.189722	-2.30141	0.0213683	NA
RNY4P7-201_163622	280.398	1.45684	0.63323	2.30066	0.021411	0.179212
hsa-mir-144_62017	31.1584	0.970606	0.422167	2.29911	0.0214989	0.179508
RNY4-201_300532	1193.9	-0.343522	0.149597	-2.29632	0.0216577	0.180084
tRNA-Pro-TGG-3-1_356299	60.6145	1.33768	0.582639	2.29589	0.021682	0.180084
hsa-mir-223_379138	31038.6	-0.263801	0.11494	-2.29512	0.0217261	0.180084
hsa-mir-22_7338	12.5581	-0.920439	0.401222	-2.29409	0.0217852	NA
hsa-mir-26a-2_1702	12.802	0.776045	0.338375	2.29344	0.0218224	NA
RP11-317N8.1-001_124333	31.4249	0.904773	0.395374	2.2884	0.0221142	0.182281
AC074130.2-001_341184	46.7776	1.18363	0.517299	2.2881	0.0221317	0.182281
ENST00000410717.1_242635	145.031	-0.677647	0.296232	-2.28755	0.0221635	0.182281
hsa-mir-30c-2_281099	20.3526	1.17045	0.512022	2.28594	0.0222578	0.182281
hsa-mir-16-1_34005	33.1984	0.658061	0.287932	2.28547	0.0222852	0.182281
hsa-mir-320a_34567	20.3887	-0.478881	0.209614	-2.28459	0.0223371	0.182281
RP11-752G15.5-002_330089	181.286	-0.498975	0.218454	-2.28411	0.0223648	0.182281
hsa-mir-425_342583	59.2418	-0.52691	0.230781	-2.28316	0.0224212	0.182306
tRNA-Pro-TGG-1-1_313115	417.347	1.0782	0.473495	2.27711	0.0227796	0.184115
RNY4P27-201_304147	20.9664	1.17321	0.515347	2.27655	0.0228131	0.184115
hsa-mir-451b_328069	30.9451	1.10592	0.485856	2.27622	0.0228327	0.184115
hsa-mir-425_329176	528.057	0.409261	0.179842	2.27567	0.0228655	0.184115
LA16c-390E6.1-002_224316	166.17	1.25807	0.553647	2.27233	0.0230664	0.184115
hsa-mir-324_103120	34.6261	0.584158	0.257107	2.27204	0.0230838	0.184115
hsa-mir-125a_298986	122.846	0.651469	0.286749	2.27192	0.0230916	0.184115
hsa-let-7f-2_225818	72.8397	-0.701161	0.30865	-2.2717	0.0231046	0.184115
hsa-mir-486-2_367000	1179.96	-0.283385	0.124802	-2.27069	0.023166	0.184115
hsa-mir-17_131365	31.2342	-0.760106	0.334788	-2.27041	0.0231828	0.184115
hsa-mir-181b-2_63530	41.0743	0.519632	0.229027	2.26887	0.0232763	0.184428
RNY4P27-201_223286	71.9337	1.28078	0.565603	2.26445	0.0235462	0.185475
hsa-let-7d_327880	65.3352	-0.938781	0.414674	-2.2639	0.0235804	0.185475
hsa-mir-320a_271104	67.4015	-0.598736	0.264549	-2.26323	0.0236212	0.185475
hsa-mir-486-2_387819	29.2156	0.77963	0.344487	2.26316	0.0236256	0.185475
hsa-mir-584_194896	77.4617	-0.616577	0.272876	-2.25955	0.0238491	0.186799
RNY4P7-201_109511	58.6964	1.22694	0.543577	2.25717	0.0239976	0.187206
hsa-mir-486-2_173213	95.5255	0.628155	0.278426	2.25609	0.0240647	0.187206
hsa_piR_020326|gb|DQ597916|Homo_sapiens_204024	206.962	1.3705	0.60747	2.25608	0.0240654	0.187206
hsa-mir-1908_52801	166.458	-0.390342	0.173176	-2.25401	0.0241954	0.187789
hsa-mir-451b_309497	18.5122	1.23633	0.548808	2.25275	0.0242747	0.187977
hsa-mir-374a_189382	1227.04	-0.621921	0.276918	-2.24586	0.0247128	0.190178
RNY4P14-201_313417	47.6671	-0.598662	0.266635	-2.24525	0.0247523	0.190178
hsa-mir-10a_220412	21.5733	0.783089	0.34879	2.24516	0.024758	0.190178
RNY4P10-201_353533	1212.2	0.572197	0.254952	2.24433	0.024811	0.190178
hsa-mir-942_3568	73.789	0.583595	0.260117	2.24359	0.0248589	0.190178
hsa-mir-361_201594	19.4581	0.859878	0.383476	2.24232	0.0249404	0.190178
hsa-mir-126_269354	239.262	-0.254308	0.113419	-2.2422	0.0249487	0.190178
hsa-mir-146a_17405	79.2815	-0.545652	0.243591	-2.24003	0.0250887	0.190398
hsa-mir-338_79170	19.2301	1.0121	0.451868	2.23982	0.0251025	0.190398
hsa-mir-23a_81573	78.8286	0.564456	0.252141	2.23865	0.0251789	0.190398
hsa-mir-140_185995	1802.94	0.349074	0.155974	2.23802	0.0252195	0.190398
hsa-mir-16-2_122524	189.705	0.657735	0.293965	2.23746	0.0252563	0.190398
hsa-mir-181a-2_245944	16.0745	0.845648	0.378268	2.23558	0.0253792	0.190903
RNY4P27-201_362669	18.3039	1.16133	0.520012	2.23328	0.0255308	0.191621
hsa-mir-339_648	11.9589	-0.883409	0.395707	-2.23249	0.0255829	NA
tRNA-Glu-TTC-2-2_151603	68.5092	-0.65089	0.291884	-2.22996	0.0257501	0.192055
hsa-let-7f-2_154426	83.8368	-0.419812	0.188354	-2.22884	0.0258245	0.192055
hsa-mir-4446_249885	41.7626	-0.660205	0.296214	-2.22881	0.0258262	0.192055
RNY4P10-201_33029	17.5445	1.1219	0.503911	2.22638	0.0259885	0.192055
hsa-mir-1277_352296	31.8296	-0.962051	0.432169	-2.2261	0.0260074	0.192055
hsa-mir-26b_197173	300.538	0.438423	0.196963	2.22591	0.0260201	0.192055
hsa-mir-6741_100105	53.4113	-0.490844	0.220528	-2.22577	0.0260295	0.192055
RNY4-201_101633	156.997	0.597713	0.268558	2.22564	0.0260385	0.192055
SMC1A-202_91374	38.7003	1.2457	0.560117	2.22399	0.026149	0.192109
hsa-mir-320a_383011	408.215	-0.50622	0.227632	-2.22385	0.0261583	0.192109
tRNA-Gly-CCC-1-1_224496	30.19	1.33082	0.59902	2.22166	0.0263064	0.192782
hsa-mir-425_21609	18.5991	0.828309	0.373016	2.22058	0.0263797	0.192905
hsa-mir-320a_251627	3054.08	-0.365581	0.164807	-2.21824	0.0265386	0.193653
hsa-mir-25_262760	21.8775	0.629299	0.284104	2.21503	0.026758	0.194447
hsa-mir-126_265758	113.317	0.462289	0.20871	2.21498	0.0267614	0.194447
hsa-mir-12136_42680	40.0065	0.80687	0.364552	2.21332	0.0268756	0.194862
hsa-mir-1180_124814	14.1914	0.845527	0.382112	2.21277	0.0269132	NA
RNY4P10-201_211476	36.596	1.16082	0.525496	2.20899	0.0271754	0.196618
hsa-mir-125b-1_6739	105.192	0.803642	0.364139	2.20697	0.0273165	0.197221
ENST00000500358.6_271709	95.6331	1.1177	0.507887	2.20068	0.0277589	0.199044
hsa-mir-3173_257585	19.4259	0.853397	0.387842	2.20038	0.0277803	0.199044
hsa-mir-3184_102770	1152.48	0.551947	0.250879	2.20005	0.0278031	0.199044
hsa-mir-23b_75879	213.552	0.342905	0.155873	2.1999	0.027814	0.199044
hsa-mir-1306_144447	21.1567	-0.761601	0.346301	-2.19925	0.0278603	0.199044
hsa-mir-27b_229390	89.3651	0.501261	0.228072	2.19782	0.0279622	0.199355
RNY4P10-201_41394	17.0284	1.18009	0.537642	2.19493	0.0281683	0.200406
hsa-mir-26a-2_132755	18.7524	-0.394346	0.179787	-2.1934	0.0282786	0.200491
tRNA-Gly-CCC-1-1_91023	37.4847	1.41431	0.645174	2.19214	0.0283695	0.200491
hsa-mir-99b_369949	17.6908	-0.60905	0.277913	-2.19151	0.0284148	0.200491
hsa-mir-186_122545	215.232	0.374277	0.170785	2.19151	0.0284151	0.200491
tRNA-Glu-CTC-1-1_79311	19.2724	1.14361	0.522561	2.18848	0.0286347	0.201254
RNY1P12-201_199154	21.5235	0.804519	0.36763	2.18839	0.0286411	0.201254
hsa-mir-15b_323026	165.056	0.737966	0.338226	2.18188	0.0291187	0.203899
hsa-mir-26a-2_356240	15.9946	-0.774029	0.354794	-2.18163	0.029137	0.203899
hsa-mir-26b_157161	61.3717	-0.376543	0.172734	-2.1799	0.0292651	0.204377
hsa-let-7g_46008	1613.11	-0.493811	0.226965	-2.17571	0.0295767	0.206042
RNY4P14-201_147016	16.392	-0.887214	0.408052	-2.17427	0.0296849	0.206042
ENST00000445125.2_269959	361.976	0.944963	0.434887	2.1729	0.0297882	0.206042
hsa-mir-146a_91637	141.096	1.45638	0.670382	2.17246	0.0298212	0.206042
hsa-mir-486-2_17436	30.9215	0.98872	0.455129	2.17239	0.029826	0.206042
AC040162.22-012_118933	60.9146	1.41764	0.652907	2.17127	0.0299105	0.206042
RP11-694I15.3-001_293575	60.243	1.30685	0.602092	2.17051	0.0299682	0.206042
hsa-mir-101-1_58536	42.8319	0.564608	0.260234	2.16961	0.0300362	0.206042
ENST00000491451.3_58306	48.8756	0.697351	0.321524	2.16889	0.0300907	0.206042
hsa-mir-486-2_386450	124.394	0.570889	0.263242	2.16868	0.0301068	0.206042
ENST00000464816.1_330848	120.3	1.23354	0.569598	2.16564	0.030339	0.207185
hsa-mir-1307_289649	421.361	-0.420219	0.194105	-2.1649	0.0303953	0.207185
hsa-mir-10a_70039	360.416	0.583465	0.26986	2.1621	0.0306101	0.207809
hsa-mir-451b_300149	10435	0.689377	0.319066	2.16061	0.0307255	0.207809
hsa-let-7g_139621	57.2677	0.526333	0.243634	2.16034	0.0307464	0.207809
hsa-mir-223_162627	207.144	-0.329117	0.152468	-2.1586	0.0308815	0.207809
RNY4P10-201_211782	65.114	1.24792	0.578279	2.15798	0.030929	0.207809
hsa-mir-150_82508	54.1522	0.634438	0.294051	2.15758	0.0309605	0.207809
hsa-mir-26a-2_60254	16.1029	0.821746	0.380898	2.15739	0.0309752	0.207809
hsa-mir-146a_192079	269.221	-0.356816	0.165438	-2.1568	0.0310216	0.207809
RP11-192K2.3-014_185407	127.732	1.20035	0.556584	2.15663	0.0310344	0.207809
hsa-mir-450b_383986	12.2898	0.880381	0.408324	2.15609	0.031077	NA
hsa-mir-23b_302650	53.8435	0.677082	0.314335	2.15401	0.0312392	0.208771
RP11-846F4.3-001_316474	43.4057	-0.588404	0.273451	-2.15177	0.0314152	0.20927
hsa-mir-126_372981	159.746	0.440188	0.204596	2.1515	0.0314365	0.20927
hsa-mir-10b_141624	56.4839	0.72187	0.335687	2.15043	0.0315216	0.209428
hsa-mir-126_312942	76.6983	0.557899	0.25958	2.14924	0.0316152	0.209486
RP11-469L3.1-001_141876	53.2452	1.16362	0.541567	2.14862	0.0316647	0.209486
hsa-mir-92a-1_206190	889.246	0.341354	0.158971	2.14728	0.0317714	0.209486
hsa-mir-186_60176	19.9525	0.723101	0.336761	2.14722	0.0317757	0.209486
hsa-mir-484_86165	72.9474	0.350931	0.16358	2.14532	0.0319272	0.21008
hsa-mir-532_242003	35.6492	0.626898	0.292525	2.14306	0.0321085	0.210866
RNY4P10-201_159161	868.544	1.45202	0.678285	2.14072	0.0322969	0.211697
RNY1-201_334946	2686.43	1.51307	0.708328	2.13611	0.0326706	0.213528
RNY4P10-201_374647	652.387	0.665677	0.311686	2.13573	0.0327013	0.213528
tRNA-Glu-TTC-14-1_97062	29.9425	1.23274	0.578474	2.13102	0.0330877	0.215638
hsa_piR_001312|gb|DQ571813|Homo_sapiens_117843	99.5971	1.2627	0.593124	2.12889	0.0332632	0.216111
hsa-mir-26a-2_5249	58.8371	-0.318673	0.149759	-2.12791	0.0333447	0.216111
hsa-mir-21_244101	2389.12	-0.379877	0.178551	-2.12755	0.0333741	0.216111
hsa-mir-126_175643	108.638	0.546837	0.257083	2.12708	0.0334134	0.216111
hsa-mir-223_33628	13.7005	-0.556759	0.261906	-2.1258	0.0335198	NA
SMC1A-202_105051	143.577	1.24322	0.58567	2.12273	0.0337766	0.21778
ENST00000445125.2_222815	68.6714	0.7815	0.368205	2.12246	0.033799	0.21778
hsa-mir-345_175733	88.5586	0.453399	0.213892	2.11975	0.0340269	0.218836
hsa-mir-150_182892	2556.36	0.566666	0.267532	2.11813	0.0341642	0.219306
hsa-mir-223_158608	1919.49	-0.307689	0.145426	-2.11577	0.0343642	0.220176
hsa-mir-16-2_323337	99.6901	0.815698	0.385835	2.11411	0.0345058	0.220463
hsa-mir-199a-1_83010	348.797	-0.488235	0.230982	-2.11373	0.0345382	0.220463
hsa-mir-92b_52761	40.5552	0.669442	0.317055	2.11144	0.0347348	0.221305
RP11-317N8.1-001_185862	44.698	0.752928	0.357497	2.10611	0.0351949	0.223726
hsa-mir-140_35439	557.318	0.338939	0.160976	2.10552	0.0352459	0.223726
hsa-mir-221_290629	82.6933	-0.582113	0.276626	-2.10433	0.0353497	0.223771
hsa-mir-152_243687	84.7498	-0.413745	0.196653	-2.10394	0.0353839	0.223771
hsa-mir-199a-1_318521	4764.48	-0.407328	0.193778	-2.10204	0.0355502	0.224406
hsa-mir-25_244339	670.625	0.208159	0.0991375	2.0997	0.0357553	0.225285
RNY4-201_290984	1910.34	0.616613	0.293794	2.09879	0.0358351	0.225372
hsa-mir-223_314262	14.5733	-0.571393	0.273138	-2.09196	0.0364424	NA
hsa-let-7b_170761	80.7776	0.553715	0.265339	2.08682	0.0369044	0.23167
hsa_piR_016658|gb|DQ592931|Homo_sapiens_355730	40.3715	-0.587969	0.282104	-2.08423	0.0371393	0.23209
RNY4P10-201_289746	20.8476	1.11163	0.534009	2.08167	0.0373731	0.23209
hsa-mir-26b_223476	12.6285	0.862788	0.414489	2.08157	0.0373815	NA
hsa-mir-30e_273785	225.149	-0.207128	0.0995218	-2.08123	0.0374125	0.23209
hsa-mir-106b_31535	360.374	-0.358035	0.172032	-2.08122	0.0374141	0.23209
hsa-mir-345_52205	27.6494	0.50437	0.242385	2.08086	0.0374468	0.23209
RP11-846F4.3-001_37208	68.0131	-0.602518	0.289658	-2.0801	0.0375162	0.23209
hsa-mir-3184_40887	1165.23	0.509226	0.244822	2.07999	0.0375266	0.23209
RNY4P20-201_220695	58.1555	1.30472	0.627472	2.07933	0.0375874	0.23209
hsa-let-7i_249774	1448.19	-0.476287	0.229121	-2.07876	0.0376392	0.23209
hsa-mir-497_149686	12.2271	-0.672251	0.323408	-2.07865	0.03765	NA
hsa-mir-181b-2_14972	27.8921	0.688449	0.331202	2.07864	0.0376508	0.23209
hsa-mir-320a_91522	4706.61	-0.393771	0.189537	-2.07754	0.0377519	0.232293
hsa-mir-1307_320902	9.81234	-0.924159	0.445027	-2.07664	0.0378351	NA
hsa-mir-25_332432	106.508	0.573419	0.276238	2.07582	0.037911	0.232853
tRNA-Asp-GTC-2-9_87812	21.6337	1.095	0.527866	2.07439	0.0380429	0.233243
hsa-mir-95_249878	25.4519	0.785612	0.379428	2.07052	0.0384038	0.235034
hsa-let-7b_77688	471.615	-0.437616	0.211602	-2.0681	0.0386302	0.235824
RNY4P23-201_358216	1041.81	0.80947	0.391517	2.06752	0.0386852	0.235824
ENST00000445125.2_160246	47.5991	0.958551	0.463754	2.06694	0.03874	0.235824
hsa-mir-27b_357526	14.9588	-0.890662	0.431485	-2.06418	0.0390008	NA
hsa-mir-361_132694	303.956	-0.247063	0.119722	-2.06364	0.0390517	0.237298
hsa-mir-92a-1_15745	25.8857	0.703842	0.341337	2.06202	0.0392063	0.237814
hsa-mir-10a_22406	75.6059	0.601765	0.292166	2.05967	0.0394303	0.238034
hsa-mir-23b_25389	234.645	0.517315	0.251262	2.05887	0.0395072	0.238034
hsa-mir-1246_231014	42.1501	0.869699	0.422428	2.05881	0.0395125	0.238034
RNY4P10-201_21570	484.995	1.36004	0.660626	2.05872	0.0395213	0.238034
hsa-mir-3184_323116	56.353	0.715158	0.347942	2.05539	0.0398413	0.239539
hsa-mir-6852_280926	55.7299	-0.403572	0.196577	-2.053	0.040073	0.239832
RNY4P14-201_271880	21.8575	0.987605	0.48106	2.05297	0.040075	0.239832
RNY4-201_29331	24.0384	-1.1888	0.579136	-2.05271	0.0401008	0.239832
RNY4P20-201_357323	46.5481	0.802766	0.391388	2.05108	0.0402594	0.24036
hsa-mir-181a-2_338902	473.396	-0.337632	0.164761	-2.04922	0.0404403	0.240452
tRNA-Glu-CTC-1-1_8087	1019.37	1.37011	0.669024	2.04793	0.0405671	0.240452
hsa-mir-30a_8012	1025.33	0.452961	0.221231	2.04746	0.0406129	0.240452
RP11-317N8.1-001_181822	52.619	0.773492	0.377795	2.04739	0.0406201	0.240452
hsa-mir-4433a_268823	94.4706	-1.00091	0.489023	-2.04676	0.0406815	0.240452
RNY4P10-201_39419	25.9132	1.08393	0.529622	2.0466	0.0406972	0.240452
hsa-mir-146b_10655	22.3271	0.845184	0.413176	2.04558	0.040798	0.24063
hsa-let-7a-1_205933	47.5445	0.592098	0.289939	2.04215	0.0411371	0.242212
hsa-let-7i_251029	16566.2	-0.356752	0.174875	-2.04004	0.0413459	0.242277
hsa-mir-190a_290447	38.0697	-0.873592	0.42837	-2.03934	0.0414158	0.242277
hsa-mir-22_369735	70.8973	-0.482548	0.236657	-2.03902	0.0414483	0.242277
hsa-mir-151a_146455	162.74	0.334277	0.163984	2.03848	0.0415023	0.242277
hsa-mir-331_14856	39.7579	-0.51802	0.254122	-2.03847	0.0415028	0.242277
RP11-694I15.3-003_330674	40.2568	1.22975	0.60351	2.03767	0.041583	0.242307
hsa-mir-223_197400	27.4174	-0.313895	0.154176	-2.03595	0.0417554	0.242307
RNY4P10-201_134488	2047.78	0.608444	0.298908	2.03556	0.0417947	0.242307
ENST00000500358.6_343360	79.7133	1.13619	0.558202	2.03544	0.0418065	0.242307
hsa-mir-320b-1_287521	30.8586	-0.753644	0.370362	-2.03488	0.0418626	0.242307
hsa-mir-29a_270128	148.968	0.360434	0.177289	2.03303	0.0420491	0.242751
AC106782.9-001_274526	140.551	0.990404	0.487233	2.03271	0.0420815	0.242751
hsa-mir-320a_149006	23929.4	-0.326988	0.161204	-2.02842	0.0425178	0.2444
hsa-mir-671_162937	18.2013	-0.769874	0.37961	-2.02806	0.0425536	0.2444
hsa-mir-29a_260983	282.902	0.248173	0.122386	2.02778	0.0425822	0.2444
hsa-mir-15a_196342	163.869	-0.448617	0.221981	-2.02097	0.0432831	0.247197
hsa-mir-26a-2_44861	65.0019	-0.271895	0.134551	-2.02076	0.0433049	0.247197
hsa-mir-320a_16656	15.1533	-0.390587	0.193302	-2.0206	0.0433208	NA
hsa-mir-15a_53605	109.09	-0.398736	0.197492	-2.019	0.0434875	0.247197
RNY4-201_688	80.7135	-0.562759	0.278762	-2.01878	0.0435097	0.247197
RNY4P10-201_313913	25.7542	1.04158	0.516077	2.01827	0.0435636	0.247197
hsa-mir-150_172951	18.1612	0.772035	0.382542	2.01817	0.0435734	0.247197
hsa-mir-451b_25065	214.912	0.766285	0.379874	2.01721	0.0436739	0.247197
RP11-227B21.1-001_29997	73.3007	1.19695	0.59372	2.01601	0.0437988	0.247197
hsa-mir-26a-2_201231	64.0703	-0.488322	0.242241	-2.01585	0.0438158	0.247197
hsa-mir-421_380249	53.0275	-0.577534	0.286504	-2.0158	0.043821	0.247197
tRNA-Leu-TAG-1-1_264928	19.9281	0.633472	0.31432	2.01537	0.0438658	0.247197
hsa-mir-486-2_353802	20.9048	0.598466	0.297781	2.00975	0.0444576	0.249575
hsa-mir-28_82976	832.081	-0.222247	0.110603	-2.00942	0.0444926	0.249575
hsa-mir-221_82969	251.332	0.324346	0.161423	2.00929	0.0445069	0.249575
hsa-mir-1307_340977	185.232	-0.371081	0.184861	-2.00735	0.0447128	0.250319
ENST00000500358.6_164855	60.18	1.22507	0.610655	2.00616	0.044839	0.250614
hsa-mir-451b_310112	4764.46	0.653537	0.32604	2.00447	0.0450201	0.251215
RNY4-201_172354	279.528	0.43066	0.214944	2.00359	0.045114	0.251328
hsa-mir-144_98328	245.89	0.611303	0.305331	2.0021	0.0452742	0.251595
hsa-mir-320a_220581	16.0881	-0.701727	0.350553	-2.00177	0.0453093	0.251595
hsa-mir-223_128809	32.4745	-0.479482	0.240002	-1.99782	0.0457361	0.253553
hsa-mir-134_322639	39.1185	-0.775676	0.388782	-1.99514	0.0460272	0.254753
tRNA-Pro-TGG-3-1_19120	41.1521	1.14054	0.572074	1.99369	0.0461856	0.255217
hsa-let-7a-1_33941	5159.66	-0.44892	0.225303	-1.99252	0.0463139	0.255512
RNY4P7-201_14080	74.4959	1.12021	0.562424	1.99175	0.0463981	0.255564
hsa-mir-425_197434	14.2437	0.669677	0.336236	1.99169	0.0464056	NA
hsa-mir-26a-2_138478	41.7649	-0.369521	0.185773	-1.9891	0.0466903	0.256441
tRNA-Val-CAC-2-1_181688	46.9096	1.28291	0.645096	1.98872	0.0467324	0.256441
ENST00000445125.2_361331	50.3066	0.789583	0.39724	1.98767	0.046848	0.256441
hsa-mir-26a-2_258584	1246.88	0.321663	0.16186	1.9873	0.0468893	0.256441
RP11-315I20.11-001_240949	54.9648	1.35021	0.679553	1.98691	0.0469329	0.256441
tRNA-Pro-TGG-1-1_321592	38.4285	1.06458	0.536078	1.98586	0.0470487	0.256663
hsa-mir-486-2_373964	23.5096	0.636201	0.320848	1.98287	0.0473817	0.258068
hsa-mir-4433a_177437	164.891	0.625879	0.315913	1.98118	0.0475715	0.258108
tRNA-Pro-TGG-1-1_349797	26.6659	1.28843	0.650763	1.97988	0.0477175	0.258108
hsa-mir-29b-2_242071	32.3207	0.605832	0.306066	1.97942	0.0477689	0.258108
ENST00000500358.6_102786	81.88	1.26069	0.636925	1.97934	0.0477773	0.258108
RP11-317N8.1-001_259845	29.6818	0.886689	0.448008	1.97918	0.0477955	0.258108
hsa-mir-30a_236326	1439.49	0.354513	0.179159	1.97876	0.0478426	0.258108
hsa-mir-223_79240	35.4695	-0.268199	0.13568	-1.97671	0.0480744	0.25895
ENST00000445125.2_28767	34.7852	1.18035	0.597406	1.97579	0.0481789	0.259104
tRNA-Leu-CAG-2-2_88942	30.9716	0.679656	0.344427	1.9733	0.0484616	0.260215
hsa-mir-16-1_272362	145.866	0.464562	0.236008	1.96842	0.0490202	0.26241
hsa-mir-152_98966	600.641	-0.375371	0.1907	-1.96838	0.0490241	0.26241
hsa-mir-320a_336052	3080.61	-0.350893	0.178484	-1.96596	0.0493029	0.263489
hsa-mir-199a-1_259740	28.317	-0.83755	0.426646	-1.9631	0.0496345	0.264846
hsa-mir-26a-2_138135	67.3701	0.409324	0.208629	1.96197	0.049766	0.265134
ENST00000445125.2_375312	26.2464	0.829056	0.422895	1.96043	0.0499454	0.265674
hsa-mir-340_316545	23.2115	-0.658396	0.336048	-1.95923	0.0500854	0.265674
hsa-mir-222_230701	22.842	0.750122	0.382891	1.9591	0.0501007	0.265674
hsa-let-7a-1_382583	14.7248	0.973878	0.49711	1.95908	0.0501035	NA
RNY4P10-201_116166	343.458	0.606889	0.310332	1.95561	0.0505105	0.267131
hsa-mir-3184_131420	217.593	0.449266	0.229752	1.95543	0.0505319	0.267131
hsa-mir-374a_275759	223.705	-0.648762	0.331893	-1.95474	0.0506142	0.267152
hsa-mir-151b_383745	18.7338	0.629037	0.322149	1.95263	0.0508636	0.268054
hsa-mir-24-2_307050	45.7808	0.464674	0.238209	1.9507	0.0510931	0.268661
hsa-mir-99b_242329	200.092	0.537732	0.275713	1.95034	0.0511361	0.268661
hsa-mir-140_331434	108.636	-0.351394	0.180384	-1.94803	0.0514111	0.269247
hsa-mir-1306_185594	175.799	-0.30716	0.157742	-1.94724	0.0515066	0.269247
hsa-mir-21_106184	32.1791	-0.33461	0.171914	-1.94638	0.0516092	0.269247
hsa-mir-660_216623	183.411	0.291653	0.149869	1.94605	0.051649	0.269247
tRNA-Val-CAC-3-1_188680	27.7889	1.20747	0.620557	1.94578	0.0516811	0.269247
hsa_piR_020388|gb|DQ598008|Homo_sapiens_348345	20.5684	1.35122	0.694555	1.94545	0.0517207	0.269247
hsa-mir-320a_10076	651.727	-0.349154	0.179615	-1.9439	0.0519077	0.26981
hsa-let-7i_22171	27.127	-0.439527	0.226213	-1.94298	0.0520188	0.269976
hsa-mir-101-1_262406	162.463	0.571142	0.294094	1.94204	0.0521326	0.27003
hsa-let-7b_103143	22.8061	0.740725	0.381505	1.94158	0.0521874	0.27003
hsa-let-7b_312702	3801.96	0.374952	0.19334	1.93934	0.0524601	0.27103
RNY4P16-201_229551	27.3011	-0.858475	0.443234	-1.93684	0.0527643	0.272019
hsa-mir-1307_40231	35.9998	-0.485822	0.250937	-1.93603	0.0528637	0.272019
hsa-mir-140_319420	16.243	0.518358	0.267773	1.93581	0.0528904	0.272019
hsa-mir-181a-2_317926	11.0326	0.661641	0.341935	1.93499	0.0529912	NA
RNY4P23-201_222243	4067.78	0.578267	0.29934	1.93181	0.0533832	0.27332
hsa-mir-24-2_309411	42.911	-0.690996	0.357695	-1.9318	0.053384	0.27332
ENST00000387459.1_151301	14.8261	-0.970136	0.502243	-1.93161	0.0534082	NA
hsa-mir-30e_369968	136.586	0.412981	0.213856	1.93112	0.0534688	0.27332
hsa-mir-26a-2_192194	43.6305	-0.583966	0.302459	-1.93073	0.0535163	0.27332
RNY1-201_226004	1717.25	1.34546	0.696947	1.93051	0.0535435	0.27332
hsa-mir-21_6198	14.7682	-0.749695	0.388644	-1.929	0.0537303	NA
hsa-mir-99a_351109	58.2284	0.483443	0.250701	1.92837	0.0538097	0.274269
hsa-mir-186_360555	1112.6	0.249852	0.129659	1.927	0.0539801	0.274727
hsa-mir-146a_242798	21.0497	0.556293	0.28882	1.92609	0.0540933	0.274818
RNY4-201_296672	192.354	-0.324003	0.168303	-1.92512	0.0542148	0.274818
hsa-mir-744_247445	14.2888	-0.766954	0.398412	-1.92502	0.0542262	NA
hsa-mir-26b_227170	2938.58	-0.394767	0.205082	-1.92492	0.0542392	0.274818
hsa-let-7e_20242	186.392	0.353425	0.183994	1.92085	0.0547506	0.27694
RNY4P7-201_199405	41.6465	1.00689	0.524341	1.9203	0.0548204	0.27694
hsa-mir-23a_207528	108.463	0.726523	0.378529	1.91933	0.0549421	0.277145
tRNA-Arg-CCT-5-1_14135	37.3692	-0.597956	0.31169	-1.91843	0.0550564	0.277312
hsa-mir-134_379530	84.313	-0.727529	0.380014	-1.91448	0.055559	0.278313
hsa-mir-548j_244554	71.0944	-0.44802	0.234033	-1.91435	0.0555759	0.278313
hsa-mir-27b_352234	19.0129	-0.716033	0.374132	-1.91385	0.0556391	0.278313
hsa-let-7f-2_383755	35.0238	-0.37455	0.195761	-1.91331	0.055709	0.278313
hsa-mir-451b_82148	22.9482	0.807794	0.422208	1.91326	0.0557144	0.278313
hsa-mir-3615_311421	81.4248	0.573137	0.299674	1.91253	0.0558077	0.278313
hsa-let-7b_242853	2318.94	-0.32555	0.170232	-1.91239	0.0558256	0.278313
hsa-let-7g_217192	109.066	0.383109	0.200486	1.9109	0.0560174	0.278862
hsa-mir-222_139762	15.4983	-0.55042	0.288325	-1.90903	0.0562584	NA
hsa-let-7b_106018	278.929	0.362345	0.189817	1.90892	0.056273	0.279326
hsa-mir-25_16193	18.0821	0.281502	0.147481	1.90873	0.0562968	0.279326
hsa-mir-125a_12747	54.6474	0.611964	0.320737	1.90799	0.0563922	0.279326
hsa-mir-30c-2_66049	29.2603	0.561797	0.294499	1.90764	0.0564377	0.279326
hsa-mir-221_195748	27.3946	-0.751284	0.394153	-1.90607	0.0566408	0.279895
RNY4P16-201_260194	271.595	0.67109	0.352224	1.90529	0.0567418	0.279895
RNY4P10-201_130916	59.2493	1.11348	0.584547	1.90486	0.0567986	0.279895
RP11-846F4.3-001_329761	15.2407	-0.734843	0.386031	-1.90359	0.0569639	NA
RNY1-201_372714	1202.67	1.30717	0.686887	1.90304	0.0570355	0.280657
ENST00000500358.6_3013	75.4911	1.05407	0.554309	1.9016	0.0572241	0.28118
hsa_piR_016658|gb|DQ592931|Homo_sapiens_311673	15.1127	-0.719069	0.378374	-1.90042	0.0573779	NA
hsa-mir-574_13392	60.7347	-0.622837	0.327809	-1.9	0.0574334	0.281803
hsa-mir-32_4942	25.105	-0.649888	0.342206	-1.89911	0.0575499	0.28197
RNY4P16-201_288146	423.809	0.534987	0.281924	1.89763	0.0577449	0.28252
hsa-mir-103b-1_197495	5005.25	-0.277452	0.146355	-1.89574	0.0579938	0.283332
hsa-let-7c_244606	162.343	-0.434006	0.229193	-1.89362	0.0582749	0.284298
hsa-let-7i_173741	15.1411	0.628522	0.332021	1.89302	0.0583553	NA
hsa-let-7c_230503	888.908	0.266369	0.140831	1.89141	0.0585693	0.284934
hsa-mir-1908_284186	42.9833	-0.497279	0.26293	-1.8913	0.0585847	0.284934
hsa-mir-320a_25760	1531.05	-0.325157	0.171971	-1.89077	0.0586556	0.284934
RP11-727F15.8-001_184826	18.4807	0.947902	0.501902	1.88862	0.0589429	0.285923
hsa-mir-486-2_15729	14.2181	0.878201	0.465221	1.88771	0.0590651	NA
hsa-mir-26b_293809	22047.9	-0.343963	0.182215	-1.88767	0.05907	0.286133
hsa-mir-494_1260	36.2775	0.796961	0.423431	1.88215	0.0598154	0.289084
RP11-694I15.3-003_60158	62.2015	1.07823	0.572951	1.88189	0.0598511	0.289084
hsa-mir-30c-2_5252	208.568	0.250798	0.133331	1.88102	0.0599693	0.289084
hsa-mir-199a-1_309719	28.701	0.671771	0.357217	1.88057	0.0600307	0.289084
hsa-mir-320a_243093	140.241	-0.404257	0.215025	-1.88004	0.0601024	0.289084
hsa-mir-26b_31153	111.386	-0.490147	0.260964	-1.87822	0.0603515	0.289874
hsa-mir-143_243317	341.301	0.365028	0.194632	1.87548	0.0607271	0.291268
RNY4P10-201_327329	82.7691	1.09758	0.585636	1.87417	0.060907	0.291331
RNY4P20-201_222041	600.179	1.23444	0.65877	1.87385	0.0609514	0.291331
hsa-mir-150_89184	31.5645	0.640112	0.341738	1.8731	0.061054	0.291331
hsa-mir-328_265825	361.014	-0.187729	0.100239	-1.87281	0.0610942	0.291331
hsa-mir-146b_378183	14.8508	0.523631	0.279665	1.87235	0.0611582	NA
hsa-mir-223_12237	1332.32	-0.230317	0.123014	-1.87229	0.0611667	0.291331
hsa-mir-26a-2_12921	57652.8	-0.287622	0.153736	-1.87088	0.0613619	0.291697
hsa-mir-486-2_174446	36.5901	-0.610551	0.326458	-1.87023	0.0614517	0.291697
hsa-mir-16-1_297369	36.549	0.622424	0.332868	1.86988	0.0614998	0.291697
RNY4P7-201_117626	53.62	1.0471	0.560231	1.86905	0.0616161	0.291843
hsa-let-7g_252420	21913.2	-0.344075	0.184174	-1.86821	0.0617326	0.29199
hsa-mir-16-1_2996	3103.91	0.509165	0.272928	1.86557	0.0621021	0.293286
hsa-mir-186_25085	901.686	-0.302987	0.162458	-1.86502	0.0621784	0.293286
hsa_piR_009295|gb|DQ582567|Homo_sapiens_187115	709.035	1.26937	0.681038	1.86388	0.0623386	0.293636
hsa-mir-3184_177888	93.3127	0.518148	0.278678	1.85931	0.0629836	0.295926
hsa-mir-425_86678	3176.12	-0.343509	0.184824	-1.85858	0.0630871	0.295926
AC106782.9-001_102806	113.64	0.98316	0.529019	1.85846	0.0631041	0.295926
SMC1A-202_62712	65.2436	1.08842	0.585809	1.85798	0.0631713	0.295926
RNY4P10-201_180660	70.8974	1.04137	0.561456	1.85477	0.0636288	0.29743
hsa-mir-874_329554	20.2414	0.639143	0.344643	1.85451	0.0636665	0.29743
RNY4P7-201_144760	35.4855	1.12408	0.606552	1.85323	0.0638499	0.297727
hsa-mir-30d_153843	153.378	0.414745	0.223842	1.85284	0.0639046	0.297727
hsa-mir-92a-2_34549	23.5805	0.422291	0.228138	1.85103	0.0641651	0.298534
RP11-694I15.3-003_251063	41.3786	1.18543	0.640773	1.85	0.0643141	0.298582
hsa-mir-101-1_9210	20.838	0.499562	0.270071	1.84974	0.0643504	0.298582
hsa-let-7g_147918	43.3177	-0.650874	0.352162	-1.84822	0.0645699	0.298878
RNY1P12-201_58926	121.248	0.312424	0.169052	1.84809	0.0645891	0.298878
RNY4-201_167539	96.0427	1.15789	0.626743	1.84747	0.0646785	0.298887
tRNA-Pro-TGG-1-1_330126	130.012	0.893144	0.484443	1.84365	0.0652341	0.300564
ENST00000464816.1_206814	232.091	1.1244	0.610069	1.84307	0.065319	0.300564
hsa-mir-106b_324484	171.755	0.363331	0.197282	1.84168	0.0655218	0.300564
hsa-mir-374c_67124	2539.52	-0.458585	0.249018	-1.84157	0.0655376	0.300564
hsa-let-7d_238696	371.752	0.257042	0.139607	1.84119	0.0655944	0.300564
RNY4P10-201_100942	34.2393	0.987433	0.53646	1.84065	0.0656733	0.300564
ENST00000500358.6_132058	79.2722	0.97235	0.528366	1.8403	0.0657244	0.300564
RP11-846F4.3-001_222164	35.4351	-0.533259	0.289794	-1.84013	0.0657492	0.300564
RNY4P20-201_191518	312.198	1.16016	0.630676	1.83956	0.0658336	0.300564
hsa-mir-30a_85651	1009.03	0.342138	0.186165	1.83782	0.0660892	0.301328
RP11-469L3.1-001_187269	54.5762	0.828563	0.451194	1.83638	0.0663016	0.301829
RNY4P10-201_49548	612.328	1.18422	0.645181	1.83548	0.0664341	0.301829
hsa-mir-132_266196	31.7141	0.523588	0.285373	1.83475	0.0665425	0.301829
hsa-mir-7-1_221672	269.934	-0.389506	0.212302	-1.83468	0.0665527	0.301829
hsa-mir-30e_113734	13.131	-0.871508	0.475196	-1.834	0.0666547	NA
hsa-mir-4433a_317960	26.7166	-0.963853	0.52655	-1.8305	0.0671745	0.304224
hsa-mir-320a_314673	31.5137	-0.528451	0.28878	-1.82994	0.0672589	0.304224
hsa-mir-26a-2_141330	27.8633	-0.323551	0.176996	-1.82802	0.0675468	0.304481
hsa-mir-30c-2_178103	150.045	-0.411367	0.225088	-1.82758	0.0676124	0.304481
hsa-mir-10b_82231	67.7002	0.717532	0.392681	1.82726	0.0676603	0.304481
RNY4P10-201_93444	19.3034	0.955535	0.522956	1.82718	0.0676724	0.304481
RNY4P10-201_233437	138.006	0.408215	0.223486	1.82658	0.0677631	0.304488
hsa-mir-664a_55740	15.0606	0.673441	0.369472	1.82271	0.068347	NA
RP11-215L17.2-001_283792	11.4042	-0.964009	0.529022	-1.82225	0.0684173	NA
hsa-mir-26a-2_70181	153.49	-0.360126	0.197654	-1.82201	0.0684537	0.306539
tRNA-Gly-GCC-5-1_150138	10357.6	1.36337	0.748375	1.82177	0.0684899	0.306539
hsa-mir-320a_339339	18.569	-0.617113	0.338821	-1.82136	0.0685528	0.306539
RNY4P10-201_372412	21.2534	0.963283	0.528932	1.82119	0.0685786	0.306539
ENST00000387372.1_260873	24.0583	1.1658	0.640618	1.81981	0.0687884	0.306814
hsa-mir-320a_1508	99.203	-0.417149	0.229302	-1.81921	0.068879	0.306814
hsa-mir-3184_110948	784.21	0.36525	0.200796	1.81901	0.0689097	0.306814
hsa-mir-190b_305522	19.5987	-0.822315	0.452265	-1.81821	0.0690315	0.306956
hsa-mir-30d_211772	264.258	1.12817	0.621532	1.81514	0.069502	0.308647
hsa-mir-185_14523	11.7528	-0.810423	0.446825	-1.81374	0.0697183	NA
hsa-mir-26b_353415	13.5546	-0.859776	0.474406	-1.81232	0.0699365	NA
hsa-mir-148b_89366	172.629	-0.517948	0.285993	-1.81105	0.070133	0.310804
hsa-mir-26a-2_370766	84.3586	-0.388871	0.214749	-1.81081	0.0701698	0.310804
RP11-694I15.3-003_20360	31.2867	1.00569	0.555943	1.80899	0.070453	0.311533
ENST00000387372.1_184135	55.162	0.572374	0.316488	1.80852	0.070526	0.311533
hsa-mir-221_375633	30.9898	0.41163	0.227673	1.80799	0.0706081	0.311533
hsa-mir-146a_140852	48.4971	-0.549928	0.30437	-1.80678	0.070797	0.311964
hsa-mir-181a-2_335893	59.2165	0.385563	0.213691	1.8043	0.0711848	0.313055
hsa-mir-25_149586	24.3624	0.696458	0.386059	1.80402	0.071228	0.313055
RNY4P7-201_188571	38.687	1.00946	0.559879	1.803	0.0713876	0.313353
hsa-let-7a-1_359648	13.2052	-0.674896	0.374557	-1.80185	0.071569	NA
hsa-let-7a-1_86785	427.334	0.314843	0.174797	1.80119	0.0716722	0.314198
hsa-mir-4433a_103896	43.3636	0.888543	0.493857	1.79919	0.0719882	0.315179
hsa-let-7f-2_321301	52021.5	-0.351497	0.195581	-1.79719	0.0723053	0.316099
hsa-mir-15b_310857	1977.51	-0.307801	0.171315	-1.7967	0.0723835	0.316099
hsa-let-7b_374171	21.1774	0.708796	0.394757	1.79553	0.07257	0.316396
hsa-mir-486-2_339588	37.8064	0.546939	0.304795	1.79445	0.0727416	0.316396
hsa-mir-29a_352458	94.9768	0.480772	0.268064	1.7935	0.0728932	0.316396
RNY4P23-201_198416	480.274	0.634781	0.353964	1.79335	0.0729168	0.316396
RP11-846F4.3-001_370470	32.9653	-0.586618	0.327127	-1.79324	0.0729344	0.316396
ENST00000445125.2_355929	27.2421	1.01482	0.566056	1.79278	0.0730074	0.316396
ENST00000467525.5_308877	22.4375	-0.733472	0.409407	-1.79155	0.0732056	0.316853
hsa-mir-320a_243630	14.0647	-0.76316	0.426278	-1.79029	0.0734079	NA
hsa-mir-421_165993	37.967	-0.641737	0.358713	-1.789	0.0736151	0.318222
hsa-mir-92a-1_177768	54.1185	0.639911	0.357893	1.788	0.0737768	0.318518
hsa_piR_009295|gb|DQ582567|Homo_sapiens_39807	82.2967	1.08911	0.609559	1.78671	0.073984	0.319009
hsa-mir-223_306262	15.1478	-0.639441	0.35803	-1.786	0.0740994	NA
RNY4P7-201_70846	27.2201	0.945569	0.529825	1.78468	0.0743129	0.319847
hsa-mir-199a-1_116289	19.2437	-0.492929	0.27625	-1.78436	0.0743656	0.319847
hsa-mir-486-2_122626	351.851	-0.245251	0.137493	-1.78373	0.0744676	0.319883
hsa-let-7f-2_2448	14.4505	-0.771691	0.433471	-1.78026	0.0750335	NA
hsa-mir-629_374173	64.1853	0.309353	0.173795	1.77999	0.0750778	0.322034
tRNA-Pro-TGG-1-1_94171	115.288	0.858074	0.482334	1.779	0.075239	0.322034
hsa_piR_000765|gb|DQ570956|Homo_sapiens_161683	19.9036	0.882919	0.49632	1.77893	0.0752512	0.322034
hsa-mir-92a-1_119155	57.2523	0.454326	0.255561	1.77776	0.0754428	0.322449
hsa-mir-146a_236713	16.6158	-0.299103	0.168377	-1.77639	0.0756682	0.323009
ENST00000410717.1_283120	699.098	-0.528789	0.297831	-1.77546	0.0758213	0.323258
hsa-mir-140_109124	41.793	0.530781	0.299236	1.77379	0.0760985	0.324035
hsa-mir-320a_23159	44.802	-0.447487	0.252531	-1.77201	0.0763932	0.324649
hsa-mir-671_204187	33.8113	-0.394223	0.222502	-1.77177	0.0764328	0.324649
hsa-let-7g_91939	18.0255	-0.363195	0.205258	-1.76945	0.076818	0.325533
RP11-18O13.1-001_54523	56.9795	1.1111	0.628095	1.769	0.0768937	0.325533
hsa-mir-329-1_57770	64.6009	0.636979	0.360268	1.76807	0.0770492	0.325533
RNY4-201_260051	20.3394	-1.01719	0.575354	-1.76793	0.0770722	0.325533
hsa-mir-342_285672	22.8946	0.581263	0.328906	1.76726	0.0771843	0.325533
hsa-let-7f-2_27881	2572.2	-0.439679	0.248815	-1.76709	0.0772128	0.325533
hsa-mir-126_47964	14.3208	0.495523	0.280425	1.76704	0.0772211	NA
hsa-let-7e_253017	17.6167	0.662647	0.375131	1.76644	0.0773217	0.32559
hsa-mir-146b_322274	559.748	0.291972	0.165454	1.76468	0.0776179	0.32638
hsa-mir-134_84953	614.203	-0.473274	0.268343	-1.76369	0.0777837	0.32638
ENST00000464816.1_372776	183.598	1.07624	0.610243	1.76362	0.077796	0.32638
hsa-mir-25_217382	37.9155	-0.449477	0.255356	-1.76019	0.0783749	0.328386
hsa-mir-320a_30645	16.5642	-0.393509	0.223629	-1.75965	0.0784666	0.328386
hsa-let-7e_335044	43.3741	-0.423967	0.241083	-1.7586	0.0786463	0.32865
ENST00000464816.1_225619	18.3527	0.947289	0.538799	1.75815	0.078722	0.32865
hsa-mir-29a_357910	14.5989	0.698172	0.39731	1.75725	0.0788754	NA
hsa-mir-103b-1_272020	256.082	0.507146	0.288782	1.75616	0.0790616	0.329275
hsa-mir-25_47345	2519.16	0.337918	0.192421	1.75614	0.0790647	0.329275
hsa-mir-342_37534	36.0117	0.491596	0.280252	1.75412	0.0794102	0.330311
hsa-mir-26a-2_116873	24.777	-0.548884	0.313446	-1.75113	0.0799238	0.332044
hsa-mir-23b_273824	96.1279	0.580838	0.331879	1.75015	0.0800921	0.332339
hsa-mir-222_189672	81.4482	-0.402514	0.230462	-1.74656	0.0807141	0.334513
hsa_piR_000291|gb|DQ570344|Homo_sapiens_224807	16.3699	-0.73042	0.418363	-1.7459	0.0808285	0.334581
hsa-mir-10a_90745	13.1875	0.626291	0.359024	1.74443	0.0810843	NA
hsa-let-7d_265944	34.6887	-0.456798	0.262005	-1.74347	0.0812509	0.335922
hsa-mir-10a_45549	47.4556	0.362055	0.207853	1.74188	0.0815298	0.33664
hsa-let-7f-2_373834	45.0828	-0.623254	0.357914	-1.74135	0.0816217	0.33664
hsa-let-7a-1_169708	14.5792	-0.38255	0.219699	-1.74125	0.0816404	NA
RNY4-201_57661	8530.99	0.501805	0.288823	1.73741	0.0823146	0.338978
hsa-let-7b_216734	773.616	0.324671	0.186915	1.737	0.082387	0.338978
AC005263.8-002_230222	120.421	-0.297943	0.171672	-1.73554	0.0826459	0.339478
hsa-mir-126_100268	18.5537	0.680914	0.392415	1.73519	0.0827073	0.339478
RNY4P10-201_119772	236.036	1.05164	0.60685	1.73295	0.083105	0.3407
hsa-mir-223_382565	37.3776	-0.251362	0.145352	-1.72933	0.0837503	0.342904
RNY4P10-201_201208	628.859	1.13428	0.656288	1.72832	0.0839303	0.342904
hsa-mir-223_109179	32.525	-0.493369	0.285526	-1.72793	0.0840011	0.342904
hsa-mir-223_113424	39.7364	-0.237048	0.137205	-1.72769	0.084044	0.342904
hsa-mir-1908_208747	19.5452	-0.583677	0.337995	-1.72688	0.0841895	0.343087
hsa-mir-369_60692	35.8874	-0.578027	0.334869	-1.72613	0.0843242	0.343226
RP11-184I16.1-001_128082	40.2068	0.906478	0.525365	1.72543	0.0844508	0.343333
hsa-mir-185_68917	28.0149	0.579799	0.33633	1.7239	0.084726	0.343648
ENST00000641545.1_127358	246.124	0.877934	0.509466	1.72325	0.0848442	0.343648
RNY4P17-201_255709	844.331	1.1408	0.662185	1.72278	0.0849279	0.343648
hsa-mir-103b-1_309187	93.8094	0.542783	0.315065	1.72277	0.0849309	0.343648
hsa-mir-486-2_303074	29.3143	-0.468573	0.272163	-1.72166	0.0851304	0.343775
hsa-mir-335_62543	79.5975	-0.398992	0.231813	-1.72118	0.0852173	0.343775
tRNA-Pro-TGG-1-1_263764	43.2703	1.01903	0.592233	1.72065	0.0853141	0.343775
RNY4P10-201_75971	41.835	0.942708	0.548016	1.72022	0.0853926	0.343775
hsa-mir-374c_52659	215.62	-0.391374	0.227567	-1.71982	0.0854655	0.343775
tRNA-Glu-CTC-1-7_134190	17.0096	-0.732415	0.426171	-1.7186	0.0856879	0.343984
RNY4P7-201_306687	54.8815	1.02471	0.596486	1.7179	0.0858141	0.343984
hsa-mir-425_57677	58.5629	0.387851	0.225774	1.71787	0.0858198	0.343984
hsa-mir-28_292566	32.1443	-0.490909	0.286203	-1.71525	0.0862995	0.344217
RP11-846F4.3-001_3905	157.198	-0.414275	0.241561	-1.71499	0.0863471	0.344217
hsa-mir-374a_154027	16.387	0.785229	0.458209	1.71369	0.0865852	0.344217
hsa-mir-29a_103402	26.7468	0.619743	0.361738	1.71323	0.0866695	0.344217
hsa-mir-22_251695	26.8962	0.405224	0.236619	1.71256	0.086794	0.344217
hsa-let-7f-2_39489	74.173	0.394509	0.230393	1.71233	0.0868363	0.344217
hsa-mir-21_235688	107.911	-0.442805	0.258603	-1.71229	0.0868425	0.344217
RP3-481F12.6-001_279623	204.083	-0.397522	0.23219	-1.71205	0.0868866	0.344217
hsa-mir-24-2_89954	114.978	-0.329969	0.192747	-1.71193	0.0869104	0.344217
hsa-mir-339_309226	20.9901	0.593854	0.346902	1.71188	0.0869188	0.344217
hsa-mir-484_235708	172.597	0.257497	0.15045	1.71151	0.0869865	0.344217
hsa-mir-29b-2_167309	58.7495	0.471537	0.275992	1.70852	0.0875401	0.346006
hsa-let-7i_310291	127.293	-0.426065	0.249525	-1.7075	0.0877287	0.346157
hsa-let-7e_247600	36.3261	0.503815	0.295358	1.70578	0.0880493	0.346157
RNY4P10-201_65064	65.0011	0.949108	0.556559	1.70532	0.0881355	0.346157
SMC1A-202_152816	186.379	0.934744	0.548417	1.70444	0.0882987	0.346157
hsa-mir-181a-2_31583	1044.33	0.231167	0.135649	1.70416	0.088352	0.346157
hsa-mir-26a-2_214755	475.015	-0.351225	0.2061	-1.70415	0.0883526	0.346157
hsa-mir-26a-2_163826	29.8994	-0.340716	0.199935	-1.70414	0.0883554	0.346157
RNY4P10-201_14260	37.1869	0.843202	0.494849	1.70396	0.0883891	0.346157
RP11-846F4.3-001_278470	110.147	-0.472011	0.277235	-1.70256	0.0886496	0.346779
hsa-mir-142_188517	45.9072	0.396055	0.232815	1.70116	0.0889132	0.347278
hsa-mir-223_116964	22.9377	-0.289782	0.17038	-1.7008	0.0889805	0.347278
RNY4P16-201_259240	21.5495	-0.746551	0.439562	-1.6984	0.0894323	0.348359
RP11-694I15.3-001_26221	29.6427	0.989854	0.582868	1.69825	0.0894614	0.348359
hsa-mir-744_122984	871.218	-0.311317	0.183692	-1.69478	0.0901171	0.350021
RNY4P10-201_97039	270.667	1.05671	0.623618	1.69448	0.0901749	0.350021
hsa-mir-576_84383	195.186	-0.304033	0.179484	-1.69392	0.0902796	0.350021
hsa-mir-9-2_236307	32.5562	-0.619461	0.365717	-1.69383	0.0902984	0.350021
hsa-mir-1307_64895	38.5082	-0.509617	0.301048	-1.69281	0.0904921	0.350375
hsa-mir-30d_99737	14.9175	0.715817	0.422966	1.69237	0.0905745	NA
RP11-215L17.2-001_19187	76.4221	-0.484578	0.286374	-1.69212	0.0906237	0.350487
RNY4P24-201_145576	1022.73	1.14095	0.674724	1.69099	0.0908378	0.350918
hsa-mir-92a-2_262162	14.9178	0.380599	0.225396	1.68858	0.0912998	NA
hsa-mir-16-2_235184	381.05	0.202062	0.119808	1.68655	0.0916896	0.353622
hsa-mir-26a-2_95803	68.3435	0.412355	0.244538	1.68626	0.0917449	0.353622
hsa-mir-2110_317216	38.2789	0.435576	0.258558	1.68464	0.0920582	0.354429
hsa-mir-20a_386050	108.396	-0.311904	0.185305	-1.68319	0.0923382	0.355107
LA16c-390E6.1-002_22810	36.9638	1.00588	0.598401	1.68094	0.0927737	0.35598
hsa-mir-26a-2_101126	60.58	-0.268092	0.159489	-1.68094	0.0927738	0.35598
hsa-mir-1249_351187	104.485	-0.206263	0.122997	-1.67697	0.0935482	0.357933
hsa-mir-320a_220574	61.2562	-0.450667	0.268863	-1.67619	0.0937005	0.357933
hsa-mir-25_148318	532.78	-0.183202	0.109317	-1.67587	0.0937641	0.357933
SMC1A-202_253221	218.489	0.96815	0.578148	1.67457	0.0940188	0.357933
RNY4P10-201_149024	92.898	0.500711	0.299024	1.67448	0.094036	0.357933
hsa-mir-335_199012	34.6275	0.464459	0.277378	1.67446	0.0940395	0.357933
hsa-mir-26a-2_73038	59.599	-0.501345	0.299475	-1.67408	0.0941146	0.357933
tRNA-Glu-CTC-1-7_258532	106.463	0.985428	0.58865	1.67405	0.0941212	0.357933
hsa-mir-12136_98109	20.4879	0.600512	0.35885	1.67344	0.0942415	0.357992
hsa-mir-26a-2_79868	16.7703	0.532277	0.318423	1.6716	0.0946024	0.358706
hsa-mir-342_323524	19.2778	0.607924	0.363814	1.67098	0.0947263	0.358706
hsa-mir-28_47493	121.893	-0.358823	0.21475	-1.67088	0.0947446	0.358706
RP11-846F4.3-001_202402	290.313	-0.360245	0.215698	-1.67013	0.0948931	0.35887
ENST00000445125.2_340468	33.8809	0.716619	0.429548	1.66831	0.0952549	0.359561
RNY4P10-201_282509	933.718	1.11594	0.668972	1.66815	0.0952863	0.359561
hsa-mir-320a_241108	23.7684	-0.627578	0.37638	-1.66741	0.0954337	0.35972
hsa-mir-532_230143	621.761	-0.17938	0.107622	-1.66676	0.0955621	0.359806
hsa-mir-4446_320378	266.391	-0.34519	0.20728	-1.66533	0.0958465	0.36048
tRNA-Glu-CTC-1-7_162274	21.3725	0.901267	0.541756	1.6636	0.0961918	0.361326
hsa-mir-1307_227000	29.4231	-0.485981	0.292259	-1.66284	0.0963435	0.361326
RP3-481F12.6-001_388160	19.8313	-0.63869	0.384359	-1.6617	0.0965728	0.361326
hsa-mir-29a_16787	23.5089	0.58796	0.353889	1.66142	0.0966283	0.361326
hsa-mir-3184_106639	5051.26	0.334238	0.201192	1.66129	0.0966557	0.361326
hsa_piR_000794|gb|DQ570992|Homo_sapiens_27752	17.5091	0.75765	0.456259	1.66057	0.0968	0.361326
RP11-849F2.1-001_145220	85.337	-0.248672	0.149756	-1.66051	0.0968122	0.361326
hsa-mir-30e_154743	34.2236	0.503957	0.303625	1.6598	0.0969542	0.361461
hsa-mir-130b_154977	36.518	-0.490443	0.295597	-1.65916	0.0970839	0.36155
hsa-mir-320a_266752	14.4944	-0.505701	0.30498	-1.65815	0.0972879	NA
hsa-mir-25_278266	12.6534	0.303199	0.182974	1.65706	0.0975064	NA
RP11-846F4.3-001_302981	122.052	-0.445394	0.268789	-1.65704	0.0975111	0.362745
hsa-mir-340_227325	11.2054	-0.864304	0.52163	-1.65693	0.0975338	NA
hsa-mir-29a_328009	47.2764	0.333803	0.201531	1.65634	0.0976528	0.362877
hsa-mir-3615_162933	56.9469	0.415099	0.250851	1.65476	0.0979728	0.363011
hsa-mir-486-2_276514	42.4006	0.621627	0.375665	1.65474	0.0979779	0.363011
RNY4P9-201_368197	300.746	1.02399	0.618981	1.65432	0.0980628	0.363011
hsa-mir-221_78341	1067.32	-0.269087	0.162718	-1.65371	0.0981873	0.363011
RP11-315I20.11-001_44448	64.2165	1.01634	0.614641	1.65354	0.0982202	0.363011
RNY4P10-201_101707	19.7522	0.920294	0.557098	1.65194	0.098546	0.363597
RP11-846F4.3-001_338323	18.3681	-0.706856	0.427952	-1.65172	0.0985918	0.363597
hsa-mir-140_63300	44.1404	0.443662	0.268766	1.65074	0.0987923	0.363944
hsa-mir-10a_36651	31.6176	0.525484	0.318871	1.64795	0.0993627	0.365651
hsa-mir-21_252221	224.516	-0.214395	0.130153	-1.64726	0.099504	0.365776
hsa-mir-122b_179495	79.275	0.627218	0.38119	1.64542	0.0998827	0.36646
hsa-mir-192_62583	11.2425	0.565753	0.343867	1.64527	0.0999147	NA
hsa-mir-16-2_361359	132.993	0.30499	0.185378	1.64524	0.099921	0.36646
hsa-mir-3184_130604	19.8837	0.633863	0.385375	1.6448	0.100012	0.36646
hsa-mir-92a-1_262441	24.7406	0.516249	0.314114	1.64351	0.100278	0.367042
hsa-mir-92a-1_221468	195.584	0.512206	0.312051	1.64142	0.100711	0.367456
hsa-mir-454_231703	73.9244	-0.485338	0.295693	-1.64136	0.100723	0.367456
hsa-mir-378a_198668	21.2416	-0.535698	0.326441	-1.64102	0.100792	0.367456
RNY4P10-201_105113	25.0219	0.895419	0.545751	1.64071	0.100857	0.367456
hsa-mir-122b_164476	205.298	0.615979	0.375513	1.64037	0.100929	0.367456
hsa-mir-106b_351513	572.926	0.249378	0.152132	1.63922	0.101167	0.367928
RNY4P27-201_331569	25.9189	0.901795	0.55102	1.63659	0.101716	0.369308
hsa-mir-342_325892	31.7907	0.493673	0.301688	1.63637	0.101762	0.369308
RNY1P12-201_168145	103.136	0.326297	0.199546	1.63519	0.102008	0.369807
hsa-mir-92a-1_318788	32.9056	0.502381	0.3074	1.63429	0.102197	0.370099
hsa-let-7b_369780	38.2176	0.477735	0.292588	1.63279	0.102513	0.370848
hsa-mir-92a-1_157430	1836.71	0.412636	0.252881	1.63174	0.102735	0.371156
ENST00000550403.5_127062	26.302	0.910423	0.558078	1.63136	0.102815	0.371156
RNY4P20-201_384384	192.293	0.534847	0.328035	1.63046	0.103005	0.37134
hsa-mir-143_72095	37.5666	-0.517169	0.317351	-1.62964	0.103177	0.37134
hsa-mir-340_345456	611.492	-0.351558	0.215736	-1.62957	0.103192	0.37134
RP11-846F4.3-001_72303	51.9674	-0.441864	0.271292	-1.62874	0.103368	0.371582
RNY1P12-201_48006	50.8767	-0.33667	0.206868	-1.62747	0.103638	0.371909
hsa-mir-16-1_319390	14.6754	0.402127	0.247129	1.6272	0.103696	NA
hsa_piR_020326|gb|DQ597916|Homo_sapiens_29076	74.6393	-0.636228	0.391112	-1.62671	0.103798	0.371909
hsa-mir-486-2_197874	65.8574	0.461621	0.283825	1.62643	0.103859	0.371909
hsa-mir-320b-1_345253	60.4574	-0.428716	0.263783	-1.62526	0.104107	0.371909
hsa-mir-486-2_192408	61.7308	0.44638	0.27466	1.62521	0.104118	0.371909
SMC1A-202_29474	56.7858	0.938535	0.577668	1.6247	0.104228	0.371909
hsa-mir-320a_17488	40.9828	-0.471403	0.290183	-1.6245	0.104268	0.371909
hsa-mir-181a-2_357750	60.0411	-0.356495	0.219547	-1.62377	0.104424	0.371909
hsa-mir-486-2_205732	30.2203	-0.428431	0.26386	-1.6237	0.104439	0.371909
hsa-let-7b_124830	14.0836	0.32874	0.202679	1.62197	0.104809	NA
hsa-mir-181a-2_16363	668.148	-0.225022	0.138741	-1.62189	0.104827	0.372902
hsa-let-7i_129910	18.9395	-0.305426	0.188572	-1.61968	0.105302	0.3742
hsa-mir-548k_77185	29.2918	-0.568103	0.350994	-1.61855	0.105543	0.374282
hsa-mir-126_168905	2085.05	0.261652	0.161678	1.61835	0.105587	0.374282
hsa-mir-223_213	36.957	-0.402357	0.248669	-1.61804	0.105654	0.374282
hsa-mir-877_170840	26.3966	-0.426419	0.263756	-1.61672	0.105939	0.374903
ENST00000362330.2_229058	178.624	0.987381	0.611164	1.61557	0.106186	0.37539
hsa-mir-151a_178424	24.2492	-0.413605	0.256186	-1.61447	0.106425	0.375611
hsa-mir-199a-1_18907	25.3527	0.550258	0.340932	1.61398	0.106531	0.375611
RNY4P27-201_328392	502.333	1.04058	0.644818	1.61376	0.106579	0.375611
RP3-481F12.6-001_16984	3525.11	-0.348951	0.216424	-1.61235	0.106886	0.375995
RP3-481F12.6-001_293971	941.63	-0.360998	0.22391	-1.61225	0.106908	0.375995
hsa-mir-486-2_274851	131.802	-0.334127	0.207335	-1.61153	0.107065	0.376158
hsa-mir-126_385000	15.1677	-0.488014	0.30334	-1.6088	0.10766	NA
RNY4P23-201_181378	36.0687	-0.607752	0.378678	-1.60493	0.108509	0.38084
hsa-mir-28_184712	88.0521	-0.2816	0.175686	-1.60286	0.108965	0.381924
RNY4P7-201_317079	32.5701	0.943534	0.588782	1.60252	0.109041	0.381924
hsa-mir-584_88525	85.0967	-0.42593	0.265967	-1.60144	0.109279	0.382004
hsa-mir-30a_148664	24.4022	0.584398	0.364929	1.6014	0.109288	0.382004
hsa-mir-223_280002	21.6824	-0.595092	0.371864	-1.60029	0.109534	0.382471
hsa-mir-16-1_59183	16.9634	0.353485	0.221103	1.59873	0.10988	0.383213
RNY1-201_373291	60.9955	0.414127	0.259205	1.59768	0.110114	0.383213
hsa-mir-421_119004	209.06	-0.290712	0.181997	-1.59734	0.110189	0.383213
hsa-let-7g_238327	61.7984	-0.500755	0.313497	-1.59732	0.110195	0.383213
hsa-let-7i_60043	11.6376	-0.618731	0.387526	-1.59662	0.110351	NA
hsa-mir-30a_186251	26.3179	0.555413	0.347885	1.59654	0.110368	0.38332
tRNA-Val-CAC-4-1_279091	33.9264	0.995803	0.623921	1.59604	0.11048	0.38332
hsa-let-7i_298376	19.2375	-0.680695	0.426708	-1.59523	0.110662	0.38332
hsa-mir-4772_66180	32.9388	0.647013	0.405607	1.59517	0.110674	0.38332
hsa-let-7g_92501	28.9569	-0.479148	0.300579	-1.59408	0.110918	0.38333
hsa-mir-92a-2_202089	35.3884	-0.515066	0.32319	-1.59369	0.111005	0.38333
ENST00000387372.1_214301	25.391	1.01479	0.636943	1.59321	0.111112	0.38333
hsa-mir-3615_83212	477.804	0.266677	0.16743	1.59277	0.111212	0.38333
RNY4P7-201_52033	885.67	1.05504	0.662443	1.59265	0.111239	0.38333
hsa-mir-181a-2_149021	289.051	0.363886	0.228674	1.59128	0.111546	0.383896
hsa-mir-3615_380926	319.03	-0.274422	0.172528	-1.59059	0.111701	0.383896
hsa-mir-21_207515	19.5325	-0.344721	0.216748	-1.59042	0.11174	0.383896
ENST00000641545.1_20201	91.8979	0.684986	0.431061	1.58907	0.112045	0.384028
hsa-mir-140_80503	1386.06	-0.235943	0.148551	-1.5883	0.112219	0.384028
hsa-mir-374a_181660	172.333	-0.34627	0.218017	-1.58827	0.112226	0.384028
hsa-let-7d_98492	57.8506	-0.27977	0.176188	-1.5879	0.112308	0.384028
hsa-mir-186_161726	17.6332	-0.520116	0.327579	-1.58776	0.112341	0.384028
hsa-mir-99a_293058	77.3252	0.421825	0.26588	1.58653	0.11262	0.384596
hsa-mir-369_57641	79.9987	-0.623721	0.393475	-1.58516	0.11293	0.385206
hsa-mir-30a_206301	97.5203	0.492394	0.310708	1.58475	0.113024	0.385206
RP11-846F4.3-001_378044	55.513	-0.373729	0.236152	-1.58258	0.113518	0.386504
ENST00000387461.2_278385	15.0798	-0.681966	0.431056	-1.58208	0.113631	NA
hsa-mir-221_22501	20.3971	-0.566871	0.358603	-1.58077	0.11393	0.38719
hsa-mir-26a-2_129175	984.791	0.29969	0.189593	1.5807	0.113946	0.38719
RNY4P7-201_382053	484.643	1.00771	0.637722	1.58017	0.114067	0.387217
ENST00000416946.1_2607	703.108	0.558684	0.354048	1.57799	0.114568	0.38853
hsa-mir-486-2_286917	241.975	0.383616	0.243338	1.57647	0.114917	0.389327
hsa-mir-126_4866	15.7198	-0.406105	0.257644	-1.57622	0.114974	NA
hsa-let-7e_138736	141.169	-0.307283	0.194991	-1.57588	0.115052	0.389399
hsa-mir-92a-1_209241	51.1901	0.393673	0.249951	1.575	0.115256	0.389703
hsa-mir-95_179987	17.6425	0.65732	0.41762	1.57397	0.115495	0.390124
hsa-mir-486-2_346953	40.2176	0.507191	0.322535	1.57252	0.115831	0.390658
hsa-mir-15b_97617	323.349	0.463971	0.29516	1.57193	0.115967	0.390658
hsa-let-7i_57189	510.646	0.346792	0.220633	1.5718	0.115996	0.390658
hsa-mir-92a-1_261493	28.9179	0.50667	0.322543	1.57086	0.116216	0.390658
hsa-mir-361_180183	112.11	0.323392	0.205915	1.57051	0.116296	0.390658
hsa-mir-221_244546	139.384	-0.345684	0.220208	-1.5698	0.116461	0.390658
hsa-mir-151a_140843	34.6243	-0.328973	0.209623	-1.56936	0.116564	0.390658
hsa-mir-101-1_387423	17.0912	0.771534	0.491881	1.56854	0.116756	0.390658
ENST00000631292.1_129509	63.5791	0.728935	0.464773	1.56837	0.116796	0.390658
hsa-mir-224_74224	23.9872	0.800823	0.510612	1.56836	0.116797	0.390658
hsa-mir-4433a_16147	55.2017	-0.751424	0.479267	-1.56786	0.116914	0.390665
hsa-mir-28_53011	13.8755	-0.487659	0.311074	-1.56766	0.116961	NA
RP11-752G15.5-002_201172	45.369	-0.342544	0.21858	-1.56713	0.117084	0.390853
hsa-mir-16-1_256869	56.7629	0.564986	0.360649	1.56658	0.117213	0.3909
hsa_piR_000765|gb|DQ570956|Homo_sapiens_387018	1823.67	1.10248	0.704212	1.56555	0.117455	0.391099
hsa-mir-146a_79960	10620.4	-0.190158	0.121491	-1.5652	0.117537	0.391099
RNY4P7-201_254947	91.747	0.9009	0.575707	1.56486	0.117616	0.391099
hsa-mir-92b_380353	15.8311	0.382302	0.244429	1.56406	0.117803	NA
hsa-mir-221_176407	291.609	-0.282887	0.181126	-1.56182	0.11833	0.393089
RNY4P28-201_62455	24.823	-0.637505	0.408341	-1.56121	0.118475	0.393189
hsa-mir-3620_94849	14.6571	-0.564308	0.361574	-1.5607	0.118594	NA
hsa-mir-26b_256763	19.0719	-0.587251	0.376729	-1.55882	0.11904	0.394591
hsa-mir-3138_24417	10.9082	-0.654071	0.419873	-1.55778	0.119285	NA
hsa-mir-93_137706	120.186	-0.298331	0.191515	-1.55774	0.119295	0.394591
hsa-mir-92a-2_337828	20.7233	0.44432	0.285302	1.55737	0.119383	0.394591
hsa-mir-451b_214810	23.2809	0.691372	0.444003	1.55713	0.119439	0.394591
hsa-mir-26b_216762	51.6716	-0.387749	0.249078	-1.55674	0.119533	0.394591
hsa-mir-486-2_327004	5565.34	0.486741	0.312761	1.55627	0.119643	0.394591
ENST00000365068.1_207122	531.673	1.05187	0.676157	1.55565	0.119791	0.394591
ENST00000516950.1_52656	470.065	0.998733	0.642056	1.55552	0.119822	0.394591
hsa-mir-486-2_31931	20.1728	0.520804	0.335257	1.55345	0.120316	0.395837
RP11-18O13.1-001_840	38.857	0.989479	0.637593	1.5519	0.120686	0.396243
RP11-315I20.11-001_175401	95.1975	1.14501	0.7381	1.55129	0.120832	0.396243
RNY4P7-201_303403	1159.95	1.04438	0.673961	1.54961	0.121234	0.396243
hsa-mir-200c_82018	116.19	-0.291119	0.187884	-1.54947	0.12127	0.396243
tRNA-Glu-TTC-2-2_19840	121.691	-0.408427	0.263702	-1.54882	0.121425	0.396243
hsa-mir-146a_138396	24.0613	0.498954	0.322266	1.54827	0.121558	0.396243
hsa-let-7f-2_57046	203.5	0.364121	0.23527	1.54767	0.121702	0.396243
tRNA-Pro-TGG-3-5_276596	75.7518	0.865751	0.5594	1.54764	0.121708	0.396243
hsa-mir-574_375417	58.0264	-0.302989	0.195824	-1.54725	0.121803	0.396243
RP11-18O13.1-004_368666	40.2714	0.793742	0.513031	1.54716	0.121825	0.396243
hsa-mir-223_171479	79.7307	-0.316359	0.204511	-1.54691	0.121886	0.396243
RNY4P16-201_16993	22.8111	-0.561836	0.363264	-1.54663	0.121952	0.396243
RNY4P10-201_25196	61.3292	0.953304	0.616657	1.54592	0.122123	0.396243
hsa-mir-181b-2_35370	133.035	0.223461	0.144592	1.54546	0.122236	0.396243
hsa-mir-382_142810	48.8841	-0.506138	0.327513	-1.5454	0.12225	0.396243
ENST00000364535.1_195788	896.261	1.02767	0.665068	1.54521	0.122296	0.396243
hsa-let-7b_207446	13.4002	-0.269003	0.174215	-1.54408	0.122568	NA
RNY4P10-201_216585	22.9824	0.976402	0.632714	1.5432	0.122783	0.397381
hsa-mir-30a_275642	28.1526	0.567444	0.367802	1.5428	0.12288	0.397381
tRNA-Leu-CAG-2-2_301873	22.3526	0.61347	0.398025	1.54129	0.123247	0.397575
ENST00000469309.1_235654	22.4489	0.751703	0.487845	1.54087	0.123349	0.397575
hsa-mir-223_126531	22.501	-0.400475	0.259942	-1.54063	0.123406	0.397575
hsa-mir-320a_140039	68.9148	-0.405546	0.263234	-1.54063	0.123406	0.397575
hsa_piR_004153|gb|DQ575660|Homo_sapiens_11330	288.891	0.974186	0.632524	1.54016	0.123522	0.397575
RNY4P10-201_73956	359.68	0.975064	0.633702	1.53868	0.123883	0.398361
hsa-mir-425_48705	7340.56	-0.126251	0.0822909	-1.53421	0.124979	0.401312
hsa-mir-345_263957	27.0791	0.581543	0.3792	1.53361	0.125127	0.401312
hsa-mir-199a-1_309133	1249.46	-0.254387	0.165932	-1.53309	0.125255	0.401312
hsa-mir-505_85443	21.1954	-0.588199	0.383688	-1.53301	0.125272	0.401312
CTB-54O9.4-002_362947	80.2291	0.747544	0.487821	1.53241	0.12542	0.401312
hsa-mir-151a_31103	440.479	-0.182601	0.119186	-1.53207	0.125505	0.401312
hsa-mir-505_49802	13.644	0.587065	0.383424	1.53111	0.125742	NA
RNY4P10-201_340947	34.2921	0.891901	0.582591	1.53092	0.125789	0.401841
AC003005.3-005_298317	17.0661	0.734276	0.480415	1.52842	0.126409	0.403445
tRNA-Glu-CTC-1-1_267530	117.68	0.902677	0.59087	1.52771	0.126585	0.40363
RNY4P14-201_69389	260.596	0.930409	0.609395	1.52678	0.126817	0.403992
hsa-mir-26b_219101	21.329	-0.322226	0.211191	-1.52575	0.127071	0.404425
hsa-mir-186_165656	2410.17	0.140316	0.0919977	1.52521	0.127207	0.40448
hsa-mir-221_98005	130.957	-0.318532	0.209048	-1.52373	0.127576	0.405049
hsa-mir-3184_128635	20.7929	0.599857	0.393848	1.52307	0.127742	0.405049
hsa-mir-3184_308332	30.1416	0.587855	0.386154	1.52233	0.127926	0.405049
hsa-mir-320a_39966	501.708	-0.380934	0.250326	-1.52176	0.12807	0.405049
hsa-mir-142_39983	712.761	-0.295476	0.194192	-1.52156	0.128118	0.405049
hsa-mir-92a-1_232082	64.4352	0.343891	0.226152	1.52062	0.128355	0.405049
CTD-2083E4.1-002_128732	27.4583	0.4625	0.304189	1.52043	0.128402	0.405049
hsa-mir-382_79913	38.4309	-0.573149	0.377076	-1.51998	0.128515	0.405049
hsa-mir-199a-1_277816	61.7501	0.968761	0.637493	1.51964	0.128601	0.405049
hsa-mir-30e_18661	176.015	-0.199912	0.131568	-1.51946	0.128647	0.405049
RNY4P10-201_165643	25.0396	0.801367	0.527463	1.51929	0.128691	0.405049
ENST00000390880.2_256084	14.5226	-0.608704	0.40098	-1.51804	0.129004	NA
hsa-mir-142_108887	66.1925	-0.45684	0.301358	-1.51594	0.129536	0.406405
hsa-mir-340_353495	431.125	-0.311425	0.205447	-1.51584	0.129561	0.406405
hsa-mir-339_142965	327.829	-0.243615	0.160739	-1.5156	0.129622	0.406405
hsa-let-7d_25116	289.888	0.421204	0.277922	1.51555	0.129634	0.406405
hsa-mir-125b-1_131790	196.944	0.357844	0.236166	1.51522	0.129716	0.406405
hsa-mir-1306_139212	110.188	-0.279959	0.185084	-1.5126	0.13038	0.40811
RNY4-201_323847	19.8292	0.821395	0.543549	1.51117	0.130745	0.408878
hsa-mir-30d_118230	1586.63	-0.25407	0.168318	-1.50947	0.131179	0.409693
hsa-mir-378a_388523	32.0816	-0.337942	0.223928	-1.50915	0.13126	0.409693
hsa-let-7i_66086	129.213	-0.374335	0.248112	-1.50874	0.131366	0.409693
hsa-mir-223_15519	20.9723	-0.581002	0.386052	-1.50498	0.132328	0.412085
RP11-260H5__B.1-002_63006	50.0995	0.826724	0.549597	1.50424	0.13252	0.412085
hsa-let-7g_388387	578.111	0.262991	0.174849	1.50411	0.132554	0.412085
hsa-mir-99b_21983	250.276	0.286537	0.190533	1.50387	0.132615	0.412085
hsa-mir-15b_22930	78.6867	-0.337727	0.224924	-1.50152	0.133221	0.413592
tRNA-Glu-CTC-1-7_132304	59.9107	-0.371887	0.247909	-1.5001	0.133589	0.414357
RNY4P10-201_240614	321.056	0.940163	0.627173	1.49905	0.133861	0.414458
hsa-mir-1273h_387490	16.6506	-0.619436	0.413228	-1.49902	0.133869	0.414458
RNY4P7-201_72111	318.996	0.935785	0.624599	1.49822	0.134077	0.414458
RNY4P10-201_134604	1085.48	1.00285	0.669413	1.4981	0.134107	0.414458
hsa-mir-194-1_388745	33.4937	0.473285	0.316217	1.49671	0.134469	0.414563
hsa-mir-99b_255851	31.7416	-0.42128	0.281536	-1.49636	0.134559	0.414563
RNY4P27-201_309238	27.334	0.809824	0.541316	1.49603	0.134646	0.414563
hsa-mir-92a-1_349959	22.0604	0.601772	0.402276	1.49592	0.134675	0.414563
hsa-mir-26b_268966	26.4247	-0.467926	0.312939	-1.49526	0.134847	0.414563
AC093401.1-001_230903	21.8647	-0.287426	0.192293	-1.49473	0.134986	0.414563
hsa-mir-194-1_74646	116.489	0.412694	0.276126	1.49458	0.135023	0.414563
RNY4P7-201_116783	34.5573	0.903878	0.604907	1.49424	0.135112	0.414563
hsa-mir-744_7389	13.0305	-0.567619	0.380173	-1.49306	0.135423	NA
hsa-mir-769_250279	130.832	-0.27074	0.181366	-1.49278	0.135495	0.415365
RNY4P27-201_388791	13509.5	1.13369	0.759739	1.49221	0.135643	0.415445
hsa-let-7a-1_199965	175.8	-0.441711	0.296363	-1.49044	0.136109	0.416497
hsa-mir-17_128749	14.9219	-0.726983	0.488	-1.48972	0.136298	NA
RNY4P10-201_277894	513.009	0.951983	0.639082	1.48961	0.136327	0.416791
hsa-mir-21_369611	28.5037	-0.562258	0.37782	-1.48816	0.136708	0.417583
hsa-mir-130b_92768	166.858	-0.355372	0.238921	-1.4874	0.136908	0.417821
hsa-let-7i_235261	23.8597	-0.599753	0.403496	-1.48639	0.137176	0.418264
RNY4P10-201_82721	1395.01	0.37627	0.253227	1.4859	0.137305	0.418286
RNY4P10-201_220469	167.777	0.28939	0.195359	1.48133	0.13852	0.420703
ENST00000364409.1_214928	24.3384	-0.867733	0.58599	-1.4808	0.13866	0.420703
hsa-mir-140_22504	718.217	0.225751	0.152491	1.48042	0.138761	0.420703
RP11-315I20.11-001_93229	43.7743	0.996	0.672889	1.48019	0.138824	0.420703
hsa-mir-16-2_201841	73.84	0.281997	0.190569	1.47977	0.138936	0.420703
hsa-mir-4433a_7331	60.6583	-0.489047	0.330509	-1.47968	0.138959	0.420703
hsa-mir-361_156314	25.8059	-0.416744	0.281717	-1.4793	0.13906	0.420703
hsa-mir-486-2_34632	40.4073	0.557833	0.377116	1.47921	0.139085	0.420703
ENST00000387459.1_259004	67.1452	-0.548654	0.371323	-1.47756	0.139525	0.421337
hsa-mir-24-2_246555	33.2336	-0.328959	0.222646	-1.4775	0.139541	0.421337
hsa-mir-223_97835	105.362	-0.265072	0.179624	-1.47571	0.140023	0.422301
hsa-let-7g_183744	64.5282	-0.457887	0.31035	-1.47539	0.140108	0.422301
hsa-let-7a-3_141075	57.7602	-0.268824	0.182373	-1.47403	0.140473	0.422322
RP13-554M15.1-001_145841	66.1493	0.899314	0.610241	1.4737	0.140562	0.422322
RNY4P10-201_34150	897.598	0.974442	0.661298	1.47353	0.140608	0.422322
hsa-mir-320a_99290	65.5204	-0.312016	0.211786	-1.47326	0.14068	0.422322
RNY4P16-201_317202	149.704	-0.464097	0.315055	-1.47307	0.140733	0.422322
hsa-mir-486-2_254515	14.336	0.45612	0.309654	1.473	0.140751	NA
hsa-mir-146a_69461	188.817	-0.221908	0.150701	-1.4725	0.140885	0.422407
hsa-mir-16-2_329303	126.841	0.361621	0.245694	1.47184	0.141065	0.422577
hsa-mir-26b_270786	18.3519	-0.334813	0.22757	-1.47125	0.141223	0.422666
hsa-mir-320a_223747	23.0922	-0.564974	0.384376	-1.46985	0.141603	0.422666
RNY4P14-201_184515	24.1405	0.754128	0.513139	1.46964	0.14166	0.422666
tRNA-Gly-GCC-1-5_340028	456.013	0.959267	0.652748	1.46958	0.141675	0.422666
RNY4P7-201_92770	868.037	0.976762	0.665448	1.46783	0.142152	0.422666
hsa-let-7a-1_257860	157.794	-0.383596	0.261393	-1.46751	0.142238	0.422666
hsa-let-7b_223909	12328.8	-0.182069	0.124092	-1.46721	0.142319	0.422666
hsa-mir-93_347099	18.3386	0.540385	0.368332	1.46712	0.142344	0.422666
CTB-61I7.2-001_175888	180.958	-0.418406	0.285234	-1.46689	0.142407	0.422666
RP11-846F4.3-001_259358	67.0568	-0.373416	0.254627	-1.46652	0.142507	0.422666
hsa-mir-92a-1_55913	1340.67	0.297245	0.202716	1.46632	0.142562	0.422666
hsa-mir-150_5049	21.7089	0.510786	0.348362	1.46625	0.14258	0.422666
RNY4P18-201_341754	45.9767	-0.686315	0.468428	-1.46514	0.142882	0.423193
hsa-mir-126_245822	20.1672	0.578204	0.395307	1.46267	0.143558	0.424826
CTB-54O9.4-002_266013	20.669	0.883468	0.604231	1.46214	0.143704	0.42489
hsa-mir-425_286911	124.039	-0.239109	0.163735	-1.46034	0.144197	0.425981
hsa-mir-25_218112	19.9248	0.432728	0.296417	1.45986	0.144328	0.425998
RNY4P6-201_74125	71.3149	0.860081	0.590597	1.45629	0.145312	0.428533
hsa-mir-24-2_296035	12.9887	0.448934	0.308434	1.45553	0.145524	NA
hsa-mir-181b-2_194442	570.608	0.236796	0.162764	1.45484	0.145713	0.429037
hsa-mir-451b_33791	17.9138	0.815805	0.560841	1.45461	0.145777	0.429037
hsa-mir-199a-1_135505	24.734	-0.414561	0.285195	-1.45361	0.146056	0.429037
RNY3P2-201_257881	28.7006	-0.6883	0.47353	-1.45355	0.146071	0.429037
RNY4P14-201_289370	19.9566	-0.583294	0.401329	-1.45341	0.146111	0.429037
hsa-let-7a-1_357992	69.2064	0.426595	0.293642	1.45277	0.146287	0.429183
hsa-mir-17_108999	27.8723	-0.568674	0.391637	-1.45204	0.146489	0.429408
hsa-mir-320a_48874	38.6819	-0.447307	0.308154	-1.45157	0.146621	0.429425
RNY4P7-201_160446	18.2451	0.71654	0.494059	1.45031	0.146972	0.429854
hsa-mir-660_43375	165.75	0.25844	0.178217	1.45014	0.147019	0.429854
hsa_piR_000823|gb|DQ571031|Homo_sapiens_235697	30.8354	0.434143	0.299611	1.44902	0.147332	0.430224
RP11-694I15.3-001_31551	32.2955	0.971856	0.670807	1.44879	0.147397	0.430224
RNY4P10-201_76417	52.2397	0.787604	0.54387	1.44815	0.147576	0.430367
hsa-mir-584_167110	20.1125	-0.469562	0.324349	-1.44771	0.147699	0.430367
ENST00000469617.3_213486	19.9147	0.683421	0.472398	1.44671	0.147979	0.430818
RNY4-201_108534	15.0006	-0.670287	0.463395	-1.44647	0.148045	NA
hsa-mir-23b_120455	18.3106	0.431855	0.298698	1.44579	0.148235	0.431195
RNY4P10-201_306878	1453.02	0.983597	0.68072	1.44494	0.148475	0.431526
hsa-let-7e_150521	15.7558	-0.434381	0.300788	-1.44414	0.148698	NA
hsa-mir-140_209039	18.3456	0.504044	0.349286	1.44307	0.149001	0.432485
hsa-let-7f-2_140514	283.434	-0.320402	0.22206	-1.44286	0.149059	0.432485
RNY4P7-201_259917	41.5412	1.1168	0.774469	1.44202	0.149296	0.432772
SMC1A-202_210660	88.8708	0.813224	0.564106	1.44162	0.149411	0.432772
RNY4P16-201_324889	52.9018	-0.590838	0.409985	-1.44112	0.149551	0.43281
hsa-mir-320a_109398	14.4896	-0.617075	0.428544	-1.43993	0.149887	NA
hsa-mir-1843_167833	11.9911	0.546	0.379321	1.43941	0.150033	NA
tRNA-Glu-TTC-2-2_348039	112.678	0.92509	0.643333	1.43796	0.150444	0.435027
RP11-752G15.5-002_26765	16.3282	-0.591343	0.412172	-1.4347	0.151373	0.436964
hsa-mir-26b_213301	30.209	0.497785	0.346977	1.43463	0.151392	0.436964
ENST00000387449.1_91631	71.3859	0.397768	0.277373	1.43405	0.151557	0.436964
ENST00000469309.1_209679	32.3721	0.745014	0.519825	1.4332	0.1518	0.436964
RNY4-201_128527	33.3851	-0.836432	0.583769	-1.43281	0.151911	0.436964
hsa-mir-3184_316542	128.825	0.260162	0.181676	1.43201	0.152141	0.436964
RNY4P27-201_302406	22.0143	0.851096	0.594372	1.43192	0.152165	0.436964
RNY1-201_12910	23.9192	0.882196	0.616208	1.43165	0.152243	0.436964
RP11-227B21.1-001_265589	26.2506	0.872984	0.609807	1.43157	0.152266	0.436964
hsa-mir-142_158287	94.9145	0.28018	0.195855	1.43055	0.15256	0.43744
hsa-mir-146a_182886	101.539	-0.253046	0.17744	-1.42609	0.153842	0.440747
hsa-let-7a-3_382347	216.375	-0.30132	0.211385	-1.42546	0.154026	0.440903
tRNA-Lys-CTT-4-1_80054	28.8635	-0.450552	0.316378	-1.42409	0.154419	0.44166
hsa-mir-27b_367976	331.002	0.204612	0.143755	1.42333	0.15464	0.441922
hsa-mir-29c_353435	17.7731	0.502182	0.352986	1.42267	0.154833	0.442102
ENST00000364596.1_135025	12.8163	-0.705948	0.49671	-1.42125	0.155244	NA
hsa-mir-769_65236	14.1995	0.555026	0.390576	1.42105	0.155303	NA
hsa-mir-369_24316	1117.42	-0.422622	0.297602	-1.42009	0.155581	0.443868
RNY4P7-201_101468	933.824	0.949382	0.668828	1.41947	0.155762	0.444013
hsa-let-7b_173136	68.4927	-0.225176	0.158724	-1.41867	0.155997	0.444311
hsa-mir-185_81680	1488.36	-0.167498	0.118167	-1.41747	0.156345	0.444932
ENST00000595789.5_135266	12.5266	-0.587034	0.414243	-1.41713	0.156446	NA
RP11-846F4.3-001_113226	17.565	-0.555756	0.39256	-1.41572	0.156856	0.446016
RP13-554M15.1-001_262444	143.013	0.856704	0.605331	1.41527	0.15699	0.446025
RNY4P10-201_85206	33.6719	0.926489	0.654856	1.4148	0.157128	0.446044
hsa-mir-186_114752	1677.68	-0.178186	0.12603	-1.41384	0.157409	0.446065
RNY4P23-201_215724	46.5556	-0.397167	0.281027	-1.41327	0.157577	0.446065
ENST00000364596.1_181554	20.3535	0.474266	0.335671	1.41289	0.157688	0.446065
tRNA-Pro-TGG-1-1_91678	18.913	0.746777	0.528624	1.41268	0.15775	0.446065
hsa-mir-320a_324113	47.8808	-0.367066	0.259931	-1.41217	0.157901	0.446065
hsa-mir-532_25486	51.9664	-0.338831	0.239947	-1.41211	0.157919	0.446065
hsa-mir-20a_351079	35.9181	-0.498263	0.353135	-1.41097	0.158254	0.446258
hsa-mir-148a_279234	68.1538	-0.36983	0.262207	-1.41045	0.158407	0.446258
CTB-61I7.2-001_289465	11.9102	-0.663865	0.470709	-1.41035	0.158436	NA
hsa-mir-30d_66019	142.333	0.883359	0.626578	1.40982	0.158594	0.446258
RNY4P10-201_320087	969.399	0.939441	0.666592	1.40932	0.158741	0.446258
hsa_piR_017716|gb|DQ594453|Homo_sapiens_267354	28.5553	-0.452257	0.320906	-1.40931	0.158742	0.446258
RNY4P7-201_107132	123.669	-0.457466	0.324624	-1.40922	0.158771	0.446258
hsa-mir-301a_11813	46.7944	-0.396636	0.281877	-1.40712	0.159391	0.44763
hsa-mir-27a_247659	67.9482	0.259814	0.185213	1.40279	0.160681	0.450578
hsa-mir-142_331749	100.314	-0.315143	0.224667	-1.40271	0.160704	0.450578
hsa-mir-1273h_320492	46.7317	-0.280409	0.199993	-1.4021	0.160886	0.450719
hsa-mir-486-2_139208	18.2081	0.539897	0.38561	1.40011	0.16148	0.451961
RNY4P10-201_340165	24.3955	0.71272	0.509235	1.39959	0.161637	0.451961
hsa-mir-320a_84334	59.3555	-0.361432	0.258297	-1.39929	0.161727	0.451961
hsa-mir-26a-2_107274	16.6492	-0.513006	0.366768	-1.39872	0.161897	0.452067
ENST00000465244.1_273307	22.0013	0.679858	0.486712	1.39684	0.162462	0.453274
hsa-mir-3184_298331	42.0124	0.500072	0.358298	1.39569	0.162808	0.453869
ENST00000363120.1_120044	30.7617	0.828549	0.594489	1.39372	0.163403	0.454926
hsa_piR_020829|gb|DQ598677|Homo_sapiens_152959	22.6499	0.860008	0.617135	1.39355	0.163454	0.454926
hsa-mir-223_212919	4964.54	-0.238594	0.171368	-1.39229	0.163834	0.455612
hsa-mir-15b_45232	22.1283	0.74199	0.533529	1.39072	0.16431	0.456566
hsa-mir-155_141326	89.0941	0.28606	0.205775	1.39016	0.164481	0.456668
hsa_piR_020009|gb|DQ597484|Homo_sapiens_93225	41.6347	0.510693	0.368068	1.3875	0.16529	0.458543
RNY4P10-201_105978	830.26	0.907074	0.654196	1.38655	0.16558	0.458973
RNY4-201_25199	210.758	0.334304	0.241256	1.38568	0.165843	0.459181
hsa-let-7a-1_53378	13.889	-0.398843	0.287875	-1.38547	0.165908	NA
hsa-mir-320a_335006	42.1421	-0.326122	0.23541	-1.38534	0.16595	0.459181
hsa-mir-151a_24570	53.4489	-0.339384	0.245046	-1.38498	0.166058	0.459181
hsa-mir-151a_215262	48.4316	-0.307757	0.22231	-1.38436	0.166248	0.459334
hsa-mir-222_115158	12.9169	0.51881	0.37483	1.38412	0.166321	NA
RP11-846F4.3-001_65578	669.256	-0.324272	0.234519	-1.38271	0.166752	0.459925
hsa-mir-24-2_221992	680.442	0.16168	0.116951	1.38246	0.166831	0.459925
ENST00000445125.2_362594	75.1278	0.586387	0.424197	1.38234	0.166866	0.459925
tRNA-Glu-CTC-1-7_117067	19.8455	-0.347027	0.251651	-1.379	0.167895	0.462082
hsa_piR_016677|gb|DQ592953|Homo_sapiens_326780	15.3139	-0.624308	0.452755	-1.37891	0.167923	NA
hsa-mir-486-2_210674	16.237	0.444705	0.322505	1.37891	0.167923	0.462082
hsa-mir-126_274372	74.3254	0.268215	0.194591	1.37835	0.168094	0.462082
hsa-mir-151a_105895	18.0337	0.426465	0.309471	1.37804	0.16819	0.462082
RNY4P27-201_173847	395.377	0.866296	0.629181	1.37686	0.168555	0.462713
hsa-mir-320a_298121	144.15	-0.297379	0.216307	-1.3748	0.169194	0.463683
AC018731.1-001_102722	18.318	0.598347	0.435402	1.37424	0.169367	0.463683
hsa-mir-146a_97502	902.283	-0.18966	0.138014	-1.37421	0.169377	0.463683
PAQR5-201_309975	47.07	0.781317	0.568713	1.37383	0.169494	0.463683
RNY3-201_227725	42.8985	-0.466783	0.339842	-1.37353	0.169587	0.463683
hsa-mir-223_102627	36.9448	-0.302356	0.220452	-1.37153	0.17021	0.465012
RNY4P7-201_125438	40.9321	0.872047	0.636069	1.371	0.170376	0.465096
RNY4P10-201_308539	925.233	0.904644	0.660427	1.36979	0.170754	0.465755
hsa-mir-26a-1_279273	12.6668	-0.586626	0.428436	-1.36923	0.170928	NA
hsa-mir-151a_360806	15.3761	-0.538503	0.393389	-1.36888	0.171036	NA
hsa-mir-29a_250659	55.5026	0.280039	0.204589	1.36879	0.171065	0.465861
RNY4P10-201_30452	22.6708	0.460985	0.336849	1.36852	0.171149	0.465861
hsa-let-7d_158304	40.0219	-0.587031	0.429006	-1.36835	0.171202	0.465861
hsa-mir-10399_119030	13.3004	-0.604181	0.441598	-1.36817	0.171258	NA
hsa-let-7a-1_88684	3383.63	0.242935	0.177628	1.36766	0.17142	0.466081
hsa-let-7f-2_188526	36.5767	0.400625	0.293344	1.36572	0.172028	0.467364
hsa-let-7b_179434	76.8773	0.309884	0.2275	1.36212	0.173159	0.470061
hsa-mir-380_338449	11.9264	-0.591234	0.434199	-1.36167	0.173303	NA
RNY4P7-201_49796	41.2278	0.760278	0.558655	1.36091	0.173543	0.470731
hsa-mir-652_123579	38.9721	-0.387581	0.285094	-1.35949	0.173992	0.471524
ENST00000445125.2_282848	41.46	0.795509	0.585316	1.35911	0.174112	0.471524
ENST00000416946.1_272024	359.224	0.473778	0.349037	1.35739	0.174659	0.472467
RNY4P10-201_274201	90.4978	0.780278	0.574943	1.35714	0.174737	0.472467
hsa-mir-425_52194	42.7536	-0.374148	0.275793	-1.35663	0.174899	0.472532
hsa-let-7b_338381	31.2211	0.393628	0.290621	1.35444	0.175597	0.473696
hsa-mir-342_185001	78.468	0.312241	0.230609	1.35398	0.175741	0.473696
hsa-mir-10a_270052	23.3134	0.548618	0.405192	1.35397	0.175746	0.473696
hsa-mir-25_69758	38.6508	-0.329569	0.243526	-1.35332	0.175952	0.473819
hsa-mir-199a-1_294225	79.9825	-0.30919	0.228529	-1.35296	0.176069	0.473819
hsa-mir-382_357884	950.33	-0.333226	0.246537	-1.35163	0.176494	0.47429
RNY4P10-201_366890	19.9522	0.60328	0.446365	1.35154	0.176522	0.47429
hsa-mir-486-2_23675	2360.38	0.216601	0.160514	1.34942	0.177203	0.475747
hsa-mir-130b_260172	143.32	-0.310444	0.230362	-1.34764	0.177775	0.476535
hsa-mir-146b_62721	97.7758	-0.243719	0.180849	-1.34763	0.177776	0.476535
hsa-mir-24-2_271437	19.7055	0.263451	0.195643	1.34659	0.178112	0.477061
hsa-mir-21_156477	33.8105	0.350195	0.260493	1.34436	0.178833	0.478409
hsa-mir-28_345222	492.723	-0.147377	0.109642	-1.34416	0.178895	0.478409
hsa-mir-221_10849	316.441	-0.272304	0.202702	-1.34337	0.179151	0.478532
hsa-mir-181b-2_110912	357.395	0.186729	0.139023	1.34315	0.179222	0.478532
RNY4P7-201_27183	1168.25	0.903451	0.674084	1.34026	0.18016	0.480047
RP11-215L17.2-001_294643	46.436	-0.535428	0.399544	-1.3401	0.180213	0.480047
hsa-mir-155_280158	131.692	0.231271	0.172649	1.33955	0.180392	0.480047
RNY4-201_375325	29.3542	-0.746296	0.55714	-1.33951	0.180404	0.480047
RNY4P3-201_339936	942.877	0.891647	0.665785	1.33924	0.180492	0.480047
hsa-mir-3184_165903	15.4911	-0.511315	0.382138	-1.33804	0.180884	NA
hsa_piR_020829|gb|DQ598677|Homo_sapiens_178667	24.8621	0.761691	0.569341	1.33785	0.180946	0.480589
tRNA-Glu-CTC-1-7_227673	21.486	-0.515334	0.385299	-1.33749	0.181063	0.480589
hsa-mir-548j_378275	22.8776	-0.498642	0.372867	-1.33732	0.181118	0.480589
hsa-mir-486-2_20750	1077.4	0.282177	0.211439	1.33456	0.182021	0.48236
RNY4-201_51314	25.2076	-0.695228	0.520998	-1.33441	0.182068	0.48236
hsa-mir-154_324056	32.4147	-0.680446	0.510772	-1.33219	0.182798	0.483918
hsa-mir-30d_46731	141.991	-0.208108	0.156414	-1.3305	0.183355	0.484814
hsa-mir-146b_354351	1824.03	-0.127996	0.0962162	-1.3303	0.18342	0.484814
tRNA-Ala-TGC-3-2_135972	52.5202	0.388737	0.292332	1.32978	0.183591	0.484891
ENST00000387342.1_369710	309.252	-0.295302	0.222726	-1.32585	0.184889	0.487941
hsa-mir-101-1_176225	54.5396	0.450192	0.340044	1.32392	0.185529	0.489251
RNY4-201_197299	1105.92	-0.33817	0.255653	-1.32277	0.185912	0.489884
hsa-mir-486-2_245656	177.871	0.36725	0.277966	1.3212	0.186434	0.490663
ENST00000416946.1_362172	897.515	0.496337	0.375723	1.32102	0.186495	0.490663
hsa_piR_020009|gb|DQ597484|Homo_sapiens_102954	15.8342	0.528481	0.400418	1.31982	0.186894	NA
tRNA-Glu-CTC-1-7_278262	3100.23	0.940208	0.712642	1.31933	0.18706	0.491748
RNY4-201_104678	181.899	0.947796	0.718614	1.31892	0.187195	0.491748
hsa-mir-140_317708	31.5455	0.355176	0.269574	1.31754	0.187657	0.492581
RNY4P7-201_88884	19.2463	0.749479	0.569168	1.3168	0.187907	0.492858
hsa-mir-199a-1_215076	320.188	-0.196558	0.14935	-1.31609	0.188143	0.493099
hsa-mir-24-2_137942	57.6282	0.286118	0.217636	1.31467	0.188622	0.493976
hsa-mir-361_210751	52.1826	0.316976	0.241258	1.31384	0.188899	0.494322
hsa-mir-320c-1_334080	77.8703	0.317283	0.242121	1.31043	0.19005	0.496953
hsa-mir-625_326249	25.1682	-0.477041	0.364578	-1.30847	0.190713	0.498305
hsa-mir-181a-2_219775	6290.28	0.156066	0.11941	1.30698	0.19122	0.498649
hsa-mir-107_365784	63.0922	-0.362957	0.277719	-1.30692	0.19124	0.498649
hsa-mir-151a_12758	278.858	-0.241632	0.184945	-1.30651	0.191379	0.498649
hsa-mir-199a-1_293445	4790.9	-0.20316	0.155523	-1.3063	0.19145	0.498649
RNY4P16-201_92521	540.706	0.428082	0.327797	1.30593	0.191575	0.498649
hsa-mir-382_161967	100.358	-0.47237	0.361971	-1.30499	0.191895	0.499102
hsa-mir-486-2_260369	66.3032	0.383681	0.294155	1.30435	0.192115	0.499293
hsa-mir-93_260900	195.503	-0.24732	0.189752	-1.30339	0.192442	0.499765
hsa-mir-139_269208	16.042	0.469984	0.360899	1.30226	0.192828	0.500385
RNY4P10-201_50556	18.6462	0.635312	0.488632	1.30018	0.193538	0.501846
RNY4P16-201_312063	545.336	0.385768	0.297013	1.29882	0.194004	0.50212
hsa-mir-25_2368	190.658	0.197551	0.152126	1.2986	0.194081	0.50212
RP11-846F4.3-001_339743	31.4303	-0.379092	0.291937	-1.29854	0.194101	0.50212
hsa-mir-320c-1_54530	21.0066	-0.332229	0.255923	-1.29816	0.194231	0.50212
hsa-mir-93_280982	13.0803	0.480396	0.370242	1.29752	0.194452	NA
hsa-mir-27b_102749	40.5625	0.310537	0.239357	1.29738	0.1945	0.502434
hsa-mir-181c_8405	12.6721	-0.594073	0.458101	-1.29682	0.194694	NA
hsa-mir-654_177575	24.8118	0.524821	0.404704	1.2968	0.194699	0.502568
hsa-mir-127_7702	82.3251	-0.431633	0.333067	-1.29593	0.194998	0.50296
hsa-mir-30d_44397	34.9559	-0.296708	0.229219	-1.29443	0.195516	0.503914
ENST00000641545.1_323849	119.424	0.523425	0.404738	1.29324	0.195927	0.504594
hsa-mir-222_42720	1249.34	-0.257329	0.199059	-1.29272	0.196107	0.504676
ENST00000387409.1_76094	23.8229	-0.449623	0.348252	-1.29109	0.196674	0.505753
hsa-mir-548ax_53186	14.7098	-0.575078	0.445703	-1.29027	0.196955	NA
RNY4P20-201_141149	390.129	0.806552	0.625621	1.2892	0.197328	0.506752
RNY4P10-201_343477	24.5684	0.71356	0.553528	1.28911	0.197359	0.506752
hsa-mir-628_334447	14.1349	0.531423	0.412623	1.28791	0.197776	NA
hsa-mir-15a_8704	73.1003	-0.321334	0.249606	-1.28736	0.197968	0.507601
hsa-let-7g_337851	23.2463	-0.276994	0.215173	-1.28731	0.197987	0.507601
hsa-mir-486-2_298116	14.9428	-0.432835	0.336482	-1.28635	0.19832	NA
tRNA-Thr-CGT-4-1_47036	15.2954	-0.538899	0.419518	-1.28457	0.198944	NA
hsa-mir-199a-1_45639	422.592	-0.285579	0.22248	-1.28362	0.199277	0.510097
RNY4P10-201_383018	440.072	0.82896	0.645986	1.28325	0.199405	0.510097
hsa-mir-30d_130736	13.958	0.421458	0.328545	1.2828	0.199562	NA
hsa-mir-148a_328640	102.024	-0.419519	0.327036	-1.28279	0.199566	0.510097
hsa-mir-26b_190519	466.962	0.259059	0.201983	1.28258	0.199639	0.510097
hsa-mir-185_279082	21.9531	-0.450358	0.351187	-1.28239	0.199707	0.510097
hsa-mir-326_130773	136.972	-0.222743	0.173863	-1.28114	0.200144	0.510832
hsa-mir-181b-2_79402	53.3057	0.296401	0.231596	1.27982	0.200608	0.511633
ENST00000364535.1_161264	19.0393	0.653933	0.51134	1.27886	0.200946	0.511722
hsa-mir-1307_235905	17.1251	-0.406901	0.318193	-1.27878	0.200973	0.511722
hsa-mir-139_33895	24.6981	0.442621	0.346218	1.27845	0.201092	0.511722
hsa-mir-186_39204	163.545	0.273593	0.214162	1.27751	0.201423	0.512181
RNY4P16-201_236477	1431.93	-0.296694	0.232723	-1.27488	0.202352	0.513161
hsa-mir-93_342577	1198.17	-0.18626	0.146122	-1.27469	0.202421	0.513161
RNY4P10-201_33657	345.006	0.815234	0.639595	1.27461	0.202448	0.513161
hsa-let-7b_182431	3292.36	0.201594	0.158197	1.27432	0.202551	0.513161
hsa-mir-223_35558	37.9068	-0.405522	0.318257	-1.2742	0.202593	0.513161
hsa-mir-320b-1_38706	15.8042	0.511965	0.401833	1.27407	0.202637	NA
hsa-mir-134_169320	19.534	-0.588403	0.461902	-1.27387	0.20271	0.513161
RNY4P28-201_177293	318.317	0.785835	0.617359	1.2729	0.203054	0.513652
hsa-mir-30e_292627	272.538	-0.224472	0.176462	-1.27207	0.203349	0.513903
hsa-mir-92a-1_259425	3453.52	0.382875	0.301242	1.27099	0.203732	0.513903
hsa-mir-181d_35369	29.5276	0.420651	0.330976	1.27094	0.203749	0.513903
hsa-mir-181b-2_35237	160.471	0.201861	0.15883	1.27092	0.203756	0.513903
tRNA-Glu-CTC-1-7_231447	15.5073	-0.760226	0.598646	-1.26991	0.204117	NA
hsa-mir-21_190634	22.0302	-0.462498	0.364215	-1.26985	0.204138	0.514489
RNY4-201_286172	24.4161	-0.755604	0.595464	-1.26893	0.204465	0.514932
hsa-mir-320a_230819	44.0206	-0.377089	0.297295	-1.2684	0.204654	0.514963
hsa-mir-342_202301	22.6507	0.476253	0.375578	1.26805	0.204779	0.514963
hsa-mir-148b_328140	26.5825	-0.552808	0.436434	-1.26665	0.205281	0.515846
hsa-mir-629_375926	56.1946	-0.348765	0.275556	-1.26568	0.205628	0.515929
hsa-mir-106b_205021	302.006	-0.16014	0.126583	-1.26509	0.205838	0.515929
hsa-mir-486-2_185380	173.746	-0.22564	0.178379	-1.26495	0.205891	0.515929
hsa-mir-93_248697	31.5041	-0.320928	0.253742	-1.26478	0.20595	0.515929
hsa-mir-92a-1_128436	33.8566	0.371365	0.29377	1.26413	0.206182	0.515929
tRNA-Pro-TGG-3-5_19618	59.5109	0.71379	0.564695	1.26403	0.206221	0.515929
hsa-mir-148a_40664	273.515	0.310073	0.245975	1.26059	0.207457	0.51837
RNY4-201_172978	37.8841	-0.666914	0.529312	-1.25996	0.207682	0.51837
tRNA-Gly-GCC-3-1_27631	52.7315	-0.341477	0.271081	-1.25969	0.207781	0.51837
hsa-mir-330_285466	46.7047	-0.34803	0.276296	-1.25963	0.207803	0.51837
hsa-mir-146b_168735	33.0445	-0.377863	0.300381	-1.25795	0.208411	0.51916
hsa-mir-21_242786	113.867	-0.337155	0.268027	-1.25791	0.208424	0.51916
hsa-mir-4433a_255320	16.2357	-0.52592	0.418748	-1.25593	0.20914	0.520563
hsa-mir-486-2_78120	411.979	0.349284	0.278793	1.25284	0.210263	0.522978
hsa-let-7d_383741	316.635	0.164838	0.131674	1.25186	0.210619	0.523483
RNY4P37-201_217691	12.9043	-0.597022	0.477514	-1.25027	0.211201	NA
RNY4P10-201_265056	167.225	0.718778	0.57543	1.24911	0.211623	0.525235
hsa-mir-221_246078	34.0276	-0.573089	0.458981	-1.24861	0.211807	0.525235
hsa-mir-185_32536	63.3269	-0.372963	0.298739	-1.24846	0.211863	0.525235
RNY4P16-201_38229	657.489	-0.264967	0.212314	-1.24799	0.212033	0.525235
hsa-let-7f-2_117550	2592.74	-0.258448	0.207118	-1.24783	0.212094	0.525235
CTB-54O9.4-002_111388	53.2419	0.728692	0.584362	1.24699	0.212402	0.52525
hsa-mir-21_50519	23.7365	-0.480339	0.385203	-1.24697	0.212407	0.52525
hsa-mir-3184_307156	14.5196	0.577719	0.463441	1.24659	0.212549	NA
hsa-mir-140_161257	40.8534	0.320121	0.256834	1.24641	0.212614	0.525381
tRNA-Glu-TTC-14-1_249117	24.8011	0.680718	0.546509	1.24558	0.21292	0.525653
tRNA-Glu-CTC-1-7_315034	4235.27	0.882203	0.708442	1.24527	0.213032	0.525653
ENST00000364596.1_191437	25.5242	-0.563103	0.452497	-1.24444	0.213339	0.526031
ENST00000387347.2_34958	14.1643	-0.580715	0.466695	-1.24431	0.213384	NA
hsa-mir-185_211019	24.5687	-0.488182	0.392566	-1.24357	0.213659	0.526114
hsa-let-7a-1_251316	18.7239	-0.3449	0.277361	-1.24351	0.213681	0.526114
RNY4P10-201_379024	77.4057	0.798661	0.64283	1.24241	0.214084	0.526468
RNY4P10-201_244961	615.476	1.03971	0.836935	1.24228	0.214133	0.526468
hsa-mir-320a_194039	22.0466	-0.492927	0.397266	-1.2408	0.214681	0.527435
ENST00000387342.1_285103	46.3074	-0.318642	0.257077	-1.23948	0.215167	0.52825
hsa-mir-374c_237289	12.3013	-0.526448	0.424805	-1.23927	0.215246	NA
hsa-mir-324_172550	13.9208	0.523167	0.422368	1.23865	0.215474	NA
hsa-mir-27b_289617	742.635	0.173956	0.140501	1.23811	0.215675	0.529118
hsa-mir-374c_93074	415.987	-0.384108	0.310639	-1.23651	0.21627	0.530111
hsa-mir-21_295217	27977.6	-0.177807	0.143842	-1.23613	0.216411	0.530111
hsa-mir-199a-1_246823	459.214	-0.229641	0.185829	-1.23576	0.216546	0.530111
RNY4P10-201_8397	46.2752	0.713083	0.577439	1.23491	0.216865	0.530194
hsa-mir-29a_6172	98.8482	-0.246942	0.199979	-1.23484	0.21689	0.530194
ENST00000387342.1_389070	193.735	-0.291414	0.236172	-1.23391	0.217238	0.530467
hsa-mir-181b-2_329254	16.3733	0.383046	0.310501	1.23364	0.217337	0.530467
RP11-192K2.3-014_277388	35.7678	0.827282	0.671094	1.23274	0.217674	0.530467
hsa-mir-142_94204	29.8595	0.329316	0.267217	1.23239	0.217803	0.530467
ENST00000387372.1_262443	26.925	0.529152	0.429377	1.23237	0.21781	0.530467
hsa-mir-30d_304612	13.5241	-0.39454	0.320172	-1.23228	0.217846	NA
PAQR5-201_42882	33.7216	0.632155	0.513096	1.23204	0.217934	0.530467
hsa-mir-4433a_50904	105.819	0.639121	0.519042	1.23135	0.218193	0.53072
RNY4-201_108850	13.023	-0.608588	0.495245	-1.22886	0.219123	NA
hsa-mir-320a_47918	45.5079	-0.451212	0.367773	-1.22688	0.219869	0.534414
hsa-mir-126_118643	13.3591	0.492259	0.40139	1.22639	0.220053	NA
RNY4P10-201_295636	227.659	0.750288	0.611938	1.22609	0.220167	0.534758
hsa-mir-26b_35208	105.408	0.294802	0.240668	1.22493	0.220601	0.535432
MT-CO2-201_311323	34.7103	0.478131	0.39059	1.22413	0.220905	0.535788
RNY4P7-201_376945	16.6526	0.629761	0.514988	1.22287	0.22138	0.53656
ENST00000387372.1_310098	38.8244	0.560247	0.458446	1.22206	0.221686	0.53692
hsa-mir-28_220485	27.9345	-0.380416	0.311532	-1.22111	0.222044	0.537357
RP11-315I20.11-001_371706	48.5826	0.820647	0.672249	1.22075	0.222181	0.537357
hsa-mir-744_378003	13.6374	0.448089	0.367409	1.21959	0.22262	NA
hsa-mir-1843_284923	56.5377	-0.381798	0.313262	-1.21878	0.222927	0.538288
hsa-mir-598_196704	110.938	-0.216983	0.178064	-1.21857	0.223007	0.538288
tRNA-Glu-CTC-1-7_61701	10076.2	0.914269	0.75049	1.21823	0.223137	0.538288
RNY4P20-201_317772	18.9624	0.607773	0.499148	1.21762	0.223368	0.538288
hsa-mir-151a_298040	158.946	-0.165319	0.135789	-1.21747	0.223427	0.538288
hsa-mir-130a_236470	92.8563	-0.405848	0.333416	-1.21724	0.223512	0.538288
hsa-mir-16-1_32936	191.168	0.279464	0.229758	1.21634	0.223855	0.53861
hsa-mir-370_210217	27.0825	0.527161	0.433596	1.21579	0.224065	0.53861
hsa-mir-204_99708	26.2956	0.472507	0.388687	1.21565	0.224119	0.53861
hsa-mir-1307_175765	368.462	0.253889	0.208933	1.21517	0.224301	0.538669
hsa-let-7b_77010	23.8571	0.205618	0.169296	1.21455	0.224539	0.538861
hsa-mir-92a-1_126392	15.6456	0.332551	0.27404	1.21351	0.224934	NA
hsa-mir-486-2_104919	21.0446	0.45156	0.372156	1.21336	0.224991	0.53927
hsa-mir-374a_340673	59.4264	-0.369056	0.304182	-1.21327	0.225025	0.53927
hsa-mir-125b-1_374809	86.4495	0.357825	0.29505	1.21276	0.225221	0.539363
hsa-mir-92a-1_327593	1438.49	-0.246074	0.203047	-1.21191	0.225547	0.539567
RNY4-201_379762	36.6679	-0.332615	0.274526	-1.2116	0.225666	0.539567
hsa-mir-199a-1_163834	17.1544	-0.399977	0.330338	-1.21081	0.225968	0.539567
hsa-mir-24-2_357877	3079.51	-0.139664	0.115371	-1.21057	0.226062	0.539567
ENST00000362330.2_218152	17.9251	-0.656019	0.541952	-1.21047	0.226097	0.539567
hsa-mir-409_216302	15.1753	-0.547314	0.452274	-1.21014	0.226226	NA
hsa-mir-223_367902	373.363	-0.169248	0.140159	-1.20754	0.227225	0.541881
tRNA-Val-CAC-4-1_369238	759.417	0.815971	0.675962	1.20713	0.227384	0.541881
hsa-mir-574_324721	325.482	-0.221221	0.183453	-1.20587	0.227867	0.542655
hsa-mir-320a_3961	44.4564	0.35319	0.293099	1.20502	0.228196	0.54304
hsa-mir-486-2_174275	17.693	-0.498173	0.413665	-1.20429	0.228477	0.54304
RNY4P7-201_183328	44.4504	0.920844	0.764803	1.20403	0.228579	0.54304
hsa-mir-486-2_89891	28.7539	0.394893	0.328101	1.20357	0.228755	0.54304
hsa-mir-584_182575	84.7385	-0.279554	0.232465	-1.20256	0.229146	0.54304
hsa-mir-451b_309627	78.7202	0.471517	0.392167	1.20234	0.229234	0.54304
RNY4P10-201_234633	246.06	0.727039	0.604697	1.20232	0.229239	0.54304
ENST00000387347.2_253192	17.1027	0.668336	0.556041	1.20195	0.229382	0.54304
hsa-mir-92a-1_173636	17.6768	-0.438061	0.364635	-1.20137	0.229609	0.54304
hsa-mir-222_77751	21.4254	0.334966	0.278876	1.20113	0.229701	0.54304
hsa-mir-16-1_217120	387.686	0.271789	0.226383	1.20057	0.229918	0.54304
RNY4P23-201_12764	47.6444	-0.423042	0.352382	-1.20052	0.229937	0.54304
RNY4P7-201_134413	60.2463	0.710943	0.592405	1.2001	0.230102	0.543053
hsa-let-7g_249543	30.9134	0.403651	0.336755	1.19865	0.230665	0.544007
hsa-mir-27b_266840	35.2541	0.428952	0.358	1.19819	0.230843	0.544051
hsa-mir-26b_30622	23.2813	-0.462754	0.386481	-1.19735	0.231168	0.544441
hsa-mir-93_369791	54.9171	-0.317309	0.265138	-1.19677	0.231397	0.544605
hsa-mir-92a-1_360443	2852.39	0.245893	0.205661	1.19562	0.231845	0.545156
hsa-mir-942_296302	40.0792	-0.301498	0.252226	-1.19535	0.231951	0.545156
hsa-mir-92a-1_46180	89.6289	0.344109	0.288112	1.19436	0.232337	0.545689
hsa-mir-32_231011	60.471	0.42546	0.356374	1.19386	0.232533	0.545774
hsa-mir-379_62170	604.545	-0.354958	0.297525	-1.19304	0.232855	0.545842
hsa-mir-339_377918	34.4016	-0.378543	0.317543	-1.1921	0.233222	0.545842
RP11-177A2.2-001_363487	71.4992	0.264212	0.221648	1.19203	0.233248	0.545842
hsa-mir-126_90944	97.2738	-0.236623	0.198546	-1.19178	0.233347	0.545842
hsa_piR_018570|gb|DQ595536|Homo_sapiens_271091	74.4881	-0.300638	0.252267	-1.19174	0.233361	0.545842
tRNA-Leu-TAG-1-1_315950	14.771	0.429914	0.360795	1.19157	0.233428	NA
hsa-mir-30a_192473	16.3065	0.435954	0.366111	1.19077	0.233744	0.546362
RNY4-201_333488	21.7481	0.393815	0.330959	1.18992	0.234077	0.546766
RP11-846F4.3-001_248632	14.8878	-0.574813	0.483153	-1.18971	0.23416	NA
hsa-mir-146a_258540	232.336	-0.166937	0.140378	-1.1892	0.234361	0.546809
hsa-let-7f-2_4260	44.8418	-0.23576	0.198274	-1.18906	0.234416	0.546809
RNY4P10-201_2951	311.953	0.735299	0.619047	1.18779	0.234915	0.54732
hsa-mir-26a-2_317582	51.5679	-0.277592	0.233759	-1.18751	0.235025	0.54732
hsa-let-7f-2_330231	13.6541	0.458743	0.386356	1.18736	0.235087	NA
hsa-mir-339_359493	29.6849	-0.382763	0.322498	-1.18687	0.235278	0.54732
ENST00000444889.1_264032	32.0042	0.85389	0.719543	1.18671	0.235342	0.54732
ENST00000387459.1_158374	115.884	-0.434021	0.365922	-1.1861	0.235582	0.54732
hsa-mir-16-2_169027	26.8833	0.262176	0.221157	1.18548	0.235828	0.54732
RNY4P7-201_112684	26.4021	0.601848	0.5078	1.18521	0.235936	0.54732
RNY4P14-201_127365	178.922	0.714572	0.603047	1.18494	0.236043	0.54732
RNY4P23-201_368459	14.2117	0.553263	0.46694	1.18487	0.236068	NA
RNY4P16-201_63661	317.442	0.285489	0.240965	1.18477	0.236107	0.54732
hsa-mir-378a_27695	1470.78	0.248361	0.209725	1.18422	0.236324	0.54732
RNY4P7-201_103854	108.112	0.682202	0.576165	1.18404	0.236398	0.54732
hsa-mir-550b-2_7575	36.2325	0.515447	0.435574	1.18338	0.23666	0.547558
hsa-mir-98_357680	12.513	-0.455757	0.385241	-1.18305	0.236791	NA
tRNA-Gly-CCC-2-1_56081	93.3302	0.91891	0.777574	1.18177	0.237299	0.548522
hsa-mir-103b-1_156198	68.4867	-0.381235	0.322701	-1.18139	0.237449	0.548522
hsa-mir-29c_313926	16.8757	0.372445	0.315435	1.18074	0.237707	0.548522
hsa-let-7f-2_386158	71.0275	-0.245999	0.208349	-1.18071	0.23772	0.548522
hsa-mir-222_276581	18.5938	0.455664	0.386175	1.17994	0.238023	0.548852
hsa-mir-1843_145435	14.6039	0.471446	0.399852	1.17905	0.238378	NA
hsa-mir-320a_125173	46.9516	0.307895	0.26118	1.17886	0.238453	0.549471
hsa-mir-151a_220985	12.3561	-0.539233	0.457436	-1.17882	0.238472	NA
hsa-mir-92a-2_303311	12.5046	0.397542	0.337596	1.17757	0.238969	NA
hsa-mir-126_302674	25.6632	0.32487	0.276219	1.17613	0.239542	0.551399
hsa-mir-106b_33071	51.9818	0.240787	0.204876	1.17528	0.239882	0.551399
hsa-mir-181d_114741	97.0007	-0.298768	0.254227	-1.1752	0.239913	0.551399
hsa-mir-30d_319141	23.1822	0.195803	0.166658	1.17488	0.240044	0.551399
hsa-mir-151a_243933	1488.73	-0.21115	0.179743	-1.17473	0.240103	0.551399
hsa-mir-22_52166	68.4689	0.259728	0.221169	1.17434	0.240258	0.551399
hsa-mir-324_228147	13.1766	-0.504648	0.429984	-1.17364	0.240538	NA
hsa-mir-486-2_386489	44.3764	0.360312	0.307086	1.17333	0.240664	0.551659
hsa-mir-320a_59398	31.7554	-0.193264	0.164725	-1.17325	0.240695	0.551659
RNY4P20-201_269039	17.5396	-0.41361	0.352722	-1.17263	0.240946	0.551865
hsa-mir-324_55571	14.8081	0.555098	0.4734	1.17258	0.240966	NA
hsa-mir-628_308985	19.7747	0.397264	0.33896	1.17201	0.241194	0.551885
ENST00000554988.1_21051	67.0841	0.349661	0.298397	1.1718	0.241278	0.551885
hsa-mir-126_152799	14.0802	0.449793	0.384053	1.17117	0.241529	NA
tRNA-Glu-CTC-1-7_326461	13.5007	-0.485118	0.414249	-1.17108	0.241568	NA
hsa_piR_016658|gb|DQ592931|Homo_sapiens_188757	26.0071	-0.70118	0.598933	-1.17072	0.241713	0.552165
RNY4P20-201_231055	27.9142	0.699686	0.59767	1.17069	0.241724	0.552165
RNY1-201_67369	32.4991	0.488339	0.417415	1.16991	0.242036	0.552509
hsa-mir-19b-2_81413	736.198	-0.229476	0.196395	-1.16844	0.242631	0.553496
hsa-mir-192_306825	15.6613	0.466104	0.399183	1.16765	0.24295	NA
hsa-let-7a-1_257958	35.7453	0.269861	0.231179	1.16732	0.24308	0.553523
hsa-mir-21_118279	51.3994	-0.170463	0.146111	-1.16667	0.243344	0.553523
hsa-mir-26b_272964	1215.41	-0.23008	0.197239	-1.1665	0.243413	0.553523
hsa-mir-12136_357425	33.2799	0.334989	0.287191	1.16643	0.243439	0.553523
hsa-mir-486-2_159889	41.3128	0.330337	0.283503	1.1652	0.243939	0.553523
hsa-mir-12136_286426	37.2872	0.492255	0.422496	1.16511	0.243974	0.553523
RP11-645N11.2-002_141411	25.1321	-0.345262	0.296396	-1.16487	0.244073	0.553523
hsa-let-7i_338759	20.9037	-0.257311	0.220898	-1.16484	0.244083	0.553523
hsa-let-7f-1_147356	159.431	-0.214174	0.183872	-1.1648	0.244101	0.553523
hsa-mir-199a-1_337750	760.262	-0.171432	0.14742	-1.16288	0.244879	0.554919
hsa-let-7g_324881	13.4482	-0.401219	0.345153	-1.16244	0.245057	NA
hsa-mir-146a_77366	17.6401	-0.42617	0.36725	-1.16043	0.245872	0.556799
RNY4P7-201_167560	48.7178	0.648718	0.559299	1.15988	0.246098	0.556942
hsa-mir-4433a_228121	512.069	0.615935	0.531635	1.15857	0.246632	0.557781
hsa-mir-199a-1_4234	274.124	-0.199098	0.172097	-1.15689	0.247317	0.558628
hsa-mir-421_189811	106.704	-0.250969	0.216942	-1.15685	0.247334	0.558628
hsa-mir-26a-2_218556	13.1737	-0.248725	0.215064	-1.15652	0.24747	NA
RNY4P17-201_203211	324.263	0.72795	0.630102	1.15529	0.247972	0.5597
hsa-mir-486-2_42573	16.0881	0.400516	0.34724	1.15343	0.248735	0.561051
RP11-752G15.5-002_23775	81.0573	-0.293647	0.254838	-1.15229	0.249202	0.561732
RNY4P10-201_294896	226.637	0.965418	0.83818	1.1518	0.249402	0.561814
hsa-mir-652_177032	372.892	-0.132172	0.114819	-1.15113	0.249679	0.562066
hsa_piR_000823|gb|DQ571031|Homo_sapiens_37959	13.1229	0.397984	0.345799	1.15091	0.249769	NA
hsa-mir-126_333323	23.3399	0.165218	0.14369	1.14982	0.250217	0.562905
tRNA-Glu-TTC-14-1_120208	47.3014	0.686575	0.597333	1.1494	0.250391	0.562926
hsa-mir-29c_163565	287.092	-0.177026	0.154156	-1.14836	0.25082	0.56352
hsa-mir-486-2_339647	13.2324	-0.53447	0.465905	-1.14716	0.251314	NA
hsa-mir-320a_387067	910.274	-0.203196	0.177237	-1.14647	0.251603	0.564368
hsa-mir-26a-2_132631	30.909	-0.206227	0.179911	-1.14628	0.251681	0.564368
hsa-mir-12136_88791	23.0341	0.742877	0.648136	1.14617	0.251723	0.564368
hsa_piR_017723|gb|DQ594464|Homo_sapiens_151756	131.972	0.679553	0.593057	1.14585	0.251858	0.564368
hsa-mir-223_243506	6767.52	-0.123168	0.107581	-1.14489	0.252257	0.564889
hsa-mir-140_52225	44.6774	-0.298221	0.260806	-1.14346	0.252848	0.565806
RNY4P18-201_67247	16.2016	-0.508432	0.44483	-1.14298	0.253047	0.565806
hsa-mir-532_215886	134.511	0.269884	0.236181	1.1427	0.253163	0.565806
hsa-mir-361_153985	65.5416	-0.249733	0.218697	-1.14192	0.253489	0.566165
RNY4P27-201_99301	168.836	0.685486	0.600702	1.14114	0.253811	0.566246
hsa-mir-320d-1_284658	17.2229	0.467157	0.409417	1.14103	0.253857	0.566246
hsa-let-7b_172837	13.4096	0.439171	0.385074	1.14049	0.254084	NA
hsa-mir-12136_15850	16.0704	0.672891	0.590675	1.13919	0.254624	0.567585
hsa-mir-151a_26678	43.3062	-0.261818	0.230098	-1.13786	0.255181	0.568455
hsa-mir-654_278783	69.4426	-0.38223	0.336133	-1.13714	0.255479	0.568749
RNY4-201_61920	66.1039	-0.394409	0.347106	-1.13628	0.25584	0.56918
hsa-mir-197_371409	14.5679	0.354414	0.312281	1.13492	0.25641	NA
hsa-mir-486-2_148163	50.9593	0.587426	0.517633	1.13483	0.256446	0.570159
RNY4P17-201_382716	59.4182	0.617558	0.544387	1.13441	0.256623	0.570181
tRNA-iMet-CAT-1-8_196532	12.1947	0.406581	0.358595	1.13381	0.256872	NA
hsa-mir-320a_295453	18.6309	0.483036	0.426051	1.13375	0.256899	0.570422
ENST00000365068.1_279710	42.5298	0.65778	0.580446	1.13323	0.257117	0.57046
hsa-mir-221_193556	22.2519	-0.289809	0.255864	-1.13267	0.257354	0.57046
hsa-mir-25_132490	33.5479	0.154796	0.136724	1.13218	0.257559	0.57046
hsa-mir-146a_183861	42.7125	-0.267159	0.235981	-1.13212	0.257584	0.57046
hsa-mir-6819_117370	29.4439	-0.400055	0.353667	-1.13116	0.257986	0.57098
hsa-mir-24-2_222759	23.1861	-0.308383	0.272894	-1.13005	0.258457	0.571651
tRNA-Val-CAC-4-1_254422	83.0887	0.676812	0.599389	1.12917	0.258826	0.572098
RP11-846F4.3-001_67294	13.5323	-0.509391	0.451243	-1.12886	0.258957	NA
hsa-mir-24-2_99744	48.3134	0.262295	0.232844	1.12648	0.25996	0.573286
hsa-mir-151a_21345	409.474	0.143238	0.127163	1.12642	0.259989	0.573286
hsa-mir-128-1_74369	46.3079	-0.294047	0.261068	-1.12633	0.260028	0.573286
hsa-let-7i_224360	11.6294	-0.240171	0.213324	-1.12585	0.260228	NA
hsa-mir-16-1_231956	13.5597	0.476231	0.423005	1.12583	0.260239	NA
RNY4P10-201_324268	26.5647	0.604243	0.537003	1.12521	0.260498	0.573286
hsa-mir-26a-1_20290	65.8089	-0.232058	0.206238	-1.12519	0.260507	0.573286
ENST00000387377.1_167378	34.9609	0.655316	0.582438	1.12512	0.260536	0.573286
hsa-let-7g_108406	17.0696	-0.226056	0.200992	-1.12471	0.260714	0.573286
hsa-mir-221_56809	17.8716	0.532867	0.473934	1.12435	0.260865	0.573286
hsa-mir-486-2_250900	53002.1	0.306371	0.272493	1.12433	0.260875	0.573286
RNY4P10-201_203479	96.825	0.646216	0.575421	1.12303	0.261424	0.573712
hsa-mir-326_23508	14.7935	-0.379325	0.338013	-1.12222	0.261769	NA
hsa-mir-151a_204748	72.6293	-0.180459	0.160812	-1.12217	0.261789	0.573712
hsa-mir-3184_185990	23.0569	0.449801	0.400993	1.12172	0.261982	0.573712
hsa-mir-21_289904	17.9597	-0.206782	0.184351	-1.12168	0.262	0.573712
hsa-mir-181c_21186	97.3058	-0.348097	0.310549	-1.12091	0.262327	0.573712
tRNA-Glu-TTC-2-2_368151	33.2255	0.778237	0.694652	1.12033	0.262575	0.573712
hsa-mir-6511b-2_341682	32.9383	-0.256508	0.228972	-1.12026	0.262604	0.573712
ENST00000384478.1_23036	67.4505	0.193341	0.172601	1.12016	0.262645	0.573712
RNY4P20-201_320344	313.918	0.702788	0.627658	1.1197	0.262842	0.573712
hsa-mir-222_154723	1105.19	0.113351	0.101249	1.11953	0.262915	0.573712
tRNA-Val-CAC-3-1_221386	42.3618	0.62031	0.554287	1.11911	0.263092	0.573712
hsa-let-7d_88215	113.846	-0.195407	0.174711	-1.11846	0.263371	0.573712
hsa-let-7b_372918	19.0871	-0.339488	0.303542	-1.11842	0.263387	0.573712
hsa-mir-486-2_29847	32.9103	0.435724	0.389615	1.11834	0.26342	0.573712
hsa-mir-101-1_9835	40.3581	-0.269045	0.24072	-1.11767	0.263709	0.573975
hsa-mir-766_145862	127.858	-0.172074	0.154185	-1.11603	0.26441	0.574514
hsa-mir-28_182090	291.242	-0.160563	0.143883	-1.11593	0.264453	0.574514
hsa-mir-486-2_156609	103.173	0.342087	0.306581	1.11582	0.264501	0.574514
hsa-let-7a-1_233712	15.7705	0.436219	0.390953	1.11578	0.264515	NA
hsa-mir-130a_96885	11.3134	-0.420713	0.37718	-1.11542	0.264672	NA
hsa-mir-382_65854	31.5321	-0.419244	0.375933	-1.11521	0.26476	0.574514
tRNA-Glu-CTC-1-1_42731	38.5686	0.678275	0.608251	1.11512	0.264798	0.574514
tRNA-Glu-TTC-2-2_94060	42.3083	0.326189	0.293104	1.11288	0.26576	0.576236
RNY4P7-201_292308	60.8857	0.63991	0.575406	1.1121	0.266094	0.576593
tRNA-Val-CAC-5-1_194119	15.4734	0.38508	0.346948	1.10991	0.267038	NA
hsa-let-7f-2_206938	34.4225	-0.222963	0.201011	-1.10921	0.267341	0.578902
hsa-mir-21_335809	34.4645	-0.177706	0.16032	-1.10844	0.26767	0.578902
hsa-mir-1843_142868	24.7244	-0.385757	0.348123	-1.10811	0.267816	0.578902
RNY4P10-201_188042	1.0207e+06	0.96917	0.874658	1.10806	0.267838	0.578902
hsa-let-7b_328675	8387.18	0.183486	0.165745	1.10704	0.268277	0.579486
hsa-mir-151a_217266	5349.61	-0.165546	0.149993	-1.10369	0.269727	0.582201
hsa-mir-128-1_340674	60.2257	-0.219405	0.198853	-1.10335	0.269875	0.582201
RNY4P7-201_152699	327.018	0.702943	0.637694	1.10232	0.270323	0.582798
hsa-let-7i_239318	13.7296	0.447536	0.406462	1.10105	0.270874	NA
hsa-mir-194-1_189711	34.8892	0.361763	0.328659	1.10072	0.271017	0.58385
ENST00000464816.1_121348	18.74	0.448013	0.407132	1.10041	0.271153	0.58385
hsa-mir-26a-2_315236	36.2879	-0.403305	0.366752	-1.09967	0.271478	0.584181
hsa-mir-15b_43976	10.9369	0.457521	0.416457	1.0986	0.271941	NA
hsa-mir-486-2_113120	150.946	0.280741	0.255548	1.09859	0.271949	0.584827
hsa-let-7g_351822	28.645	-0.346892	0.31645	-1.0962	0.272992	0.586688
hsa-mir-15a_234346	678.009	0.204044	0.186216	1.09574	0.273194	0.586688
hsa-let-7f-2_385909	15.0581	-0.306612	0.279853	-1.09562	0.273246	NA
hsa-let-7a-1_247503	173.463	-0.21735	0.198524	-1.09483	0.273593	0.586688
hsa-mir-151a_61495	63.9608	-0.274667	0.250897	-1.09474	0.273631	0.586688
hsa-mir-486-2_205817	85.111	0.427639	0.390795	1.09428	0.273832	0.586688
hsa-mir-493_368823	21.6184	-0.467836	0.427716	-1.0938	0.274042	0.586688
RNY4P16-201_367529	49.1387	0.36758	0.3362	1.09334	0.274245	0.586688
hsa-mir-30a_126152	153.179	0.200882	0.18374	1.09329	0.274265	0.586688
hsa-mir-1843_197097	48.8934	-0.240581	0.220172	-1.09269	0.274528	0.586688
LA16c-390E6.1-002_325716	29.6195	0.568665	0.520561	1.09241	0.274654	0.586688
RNY4-201_139058	51.9349	0.465529	0.426194	1.09229	0.274704	0.586688
hsa-mir-3120_372862	15.4474	-0.457318	0.419013	-1.09142	0.275089	NA
RNY4P27-201_47852	36.39	0.578452	0.530298	1.0908	0.275359	0.587438
hsa-mir-339_120818	15.9148	0.424369	0.389122	1.09058	0.275457	0.587438
hsa-mir-22_62933	46.4187	-0.390338	0.358003	-1.09032	0.275571	0.587438
RNY4P14-201_69791	26.6173	0.30564	0.280511	1.08958	0.275898	0.587767
hsa-mir-486-2_387945	21.9817	0.375319	0.344617	1.08909	0.276113	0.58786
RNY4P10-201_323683	43.2343	0.638024	0.586276	1.08827	0.276478	0.588001
tRNA-Pro-TGG-1-1_359028	43.2699	0.578886	0.532098	1.08793	0.276626	0.588001
RNY3P2-201_132129	66.6044	-0.502023	0.461515	-1.08777	0.276696	0.588001
hsa-mir-27b_309462	20.644	0.455931	0.419443	1.08699	0.277041	0.588368
hsa-mir-30d_19172	19.4959	0.317461	0.292208	1.08642	0.277293	0.588536
hsa-mir-345_69861	13.9227	0.328695	0.302592	1.08626	0.277362	NA
RP3-337O18.1-012_386202	29.6064	0.501674	0.462074	1.0857	0.277611	0.588846
hsa-mir-28_200405	2150.86	-0.105159	0.0969323	-1.08487	0.277978	0.589258
hsa-mir-148a_24725	132.698	-0.261766	0.241506	-1.08389	0.278412	0.589743
ENST00000387347.2_28342	30.6104	0.59943	0.553195	1.08358	0.278552	0.589743
hsa-mir-148a_338018	19.6651	-0.481905	0.445025	-1.08287	0.278865	0.590039
hsa-mir-345_178322	15.0478	-0.398804	0.369229	-1.0801	0.280097	NA
hsa-mir-320d-1_227510	16.1088	0.408513	0.378351	1.07972	0.280267	0.592293
hsa-mir-10527_99884	53.6834	-0.244553	0.226501	-1.0797	0.280277	0.592293
RNY4P10-201_265734	37.264	0.595598	0.55245	1.0781	0.280988	0.593428
RNY4P7-201_221049	13.7401	0.504109	0.467976	1.07721	0.281385	NA
RNY4P27-201_307111	39.3847	0.582238	0.540737	1.07675	0.281592	0.594086
hsa-mir-27b_127861	35.4397	0.288897	0.268335	1.07663	0.281647	0.594086
hsa-mir-375_149617	40.8553	-0.546333	0.507876	-1.07572	0.282052	0.594573
hsa-mir-126_178477	1041.5	0.131473	0.122359	1.07449	0.282603	0.595367
RNY4-201_124202	23.3755	0.551868	0.514204	1.07325	0.28316	0.595859
RNY4P20-201_317536	303.146	0.663884	0.618608	1.07319	0.283186	0.595859
RNY4P7-201_181623	88.5395	0.611503	0.570264	1.07232	0.283578	0.596071
RNY4P10-201_102442	42.3725	0.613624	0.57231	1.07219	0.283636	0.596071
hsa-mir-148b_339870	747.525	-0.189082	0.17649	-1.07135	0.284012	0.596359
RP11-317N8.1-001_121095	51.6998	0.384532	0.359042	1.071	0.284171	0.596359
RP3-481F12.6-001_296261	580.11	-0.235081	0.219555	-1.07072	0.284296	0.596359
hsa_piR_016677|gb|DQ592953|Homo_sapiens_229610	27.6955	0.612095	0.572726	1.06874	0.285187	0.59684
hsa-mir-195_342952	66.3577	0.30871	0.288888	1.06861	0.285244	0.59684
tRNA-Trp-CCA-2-1_82703	29.4126	0.42262	0.395494	1.06859	0.285255	0.59684
hsa-mir-3184_70694	48.7214	-0.300255	0.281105	-1.06813	0.285463	0.59684
hsa-mir-199a-1_93671	31.9924	-0.279358	0.261612	-1.06783	0.285596	0.59684
hsa-mir-93_241697	120.782	-0.191342	0.179252	-1.06745	0.285768	0.59684
ENST00000490232.3_249679	17.0097	0.457641	0.428808	1.06724	0.285864	0.59684
hsa-mir-486-2_348346	107.503	-0.213982	0.200525	-1.06711	0.285924	0.59684
hsa-mir-328_223924	32.4889	-0.328656	0.308107	-1.06669	0.28611	0.596864
hsa-mir-374a_253183	135.659	-0.276572	0.259556	-1.06556	0.286624	0.597571
hsa-mir-16-2_327064	90.5677	0.237496	0.222983	1.06508	0.286838	0.597651
ENST00000387449.1_25433	21.9779	0.668733	0.628618	1.06381	0.287413	0.598156
hsa-mir-29c_209899	257.961	0.158924	0.149396	1.06378	0.28743	0.598156
hsa-mir-24-2_190898	716.596	-0.123353	0.116104	-1.06243	0.288041	0.599062
hsa-mir-28_292873	329.362	-0.209064	0.196915	-1.06169	0.288374	0.59939
hsa-mir-483_133260	111.413	0.377348	0.355584	1.0612	0.288597	0.599488
hsa-mir-26a-2_270108	45.7069	-0.166355	0.156911	-1.06019	0.28906	0.599779
hsa-mir-20b_167190	66.2647	-0.272386	0.25695	-1.06007	0.289112	0.599779
hsa-mir-146b_226228	36.8885	-0.607593	0.573342	-1.05974	0.289264	0.599779
RNY4P10-201_131705	56.3209	0.678523	0.64071	1.05902	0.289592	0.59998
hsa-mir-146a_337050	20.2381	-0.39144	0.369718	-1.05875	0.289712	0.59998
RNY4P27-201_131478	12.4161	-0.529236	0.500123	-1.05821	0.289959	NA
hsa-mir-155_121977	311.125	0.166807	0.157704	1.05772	0.290184	0.60007
hsa-mir-340_238362	143.633	-0.240515	0.227405	-1.05765	0.290215	0.60007
RNY4P10-201_347988	445.535	0.914743	0.865004	1.0575	0.290283	0.60007
ENST00000362765.1_74722	52.5279	0.29222	0.276453	1.05703	0.290496	0.600148
hsa-mir-1307_63212	518.304	-0.196184	0.185694	-1.05649	0.290745	0.600219
hsa-mir-425_2291	126.168	-0.176297	0.16697	-1.05586	0.291034	0.600219
hsa-mir-584_338271	49.0775	-0.300009	0.284378	-1.05497	0.29144	0.600219
hsa-mir-16-2_164190	18.3523	0.250148	0.237194	1.05461	0.291602	0.600219
hsa-mir-1843_2982	17.445	0.42302	0.40137	1.05394	0.291911	0.600219
hsa-let-7f-2_114556	113.025	-0.251416	0.238552	-1.05393	0.291916	0.600219
RNY4P10-201_268557	24.6009	0.604446	0.57353	1.0539	0.291927	0.600219
RNY4P10-201_333606	28.5997	0.58406	0.554199	1.05388	0.291937	0.600219
MMRN1-201_343963	26.1441	-0.370815	0.352222	-1.05279	0.292439	0.600315
RP11-846F4.3-001_108561	98.7707	-0.279117	0.265245	-1.0523	0.292662	0.600315
RNY4P10-201_211144	123.2	0.603855	0.573851	1.05228	0.292669	0.600315
hsa-mir-486-2_174240	24.7619	-0.293664	0.279107	-1.05216	0.292727	0.600315
RNY4P7-201_130287	13.7943	0.48984	0.466063	1.05102	0.293251	NA
hsa-let-7a-3_37445	58.5971	-0.227624	0.216597	-1.05091	0.293301	0.600315
hsa-mir-324_302482	126.439	-0.222131	0.211401	-1.05075	0.293371	0.600315
hsa-mir-1249_107525	49.7509	0.243551	0.23179	1.05074	0.293379	0.600315
hsa-mir-26b_200310	36.7377	-0.214783	0.204416	-1.05071	0.29339	0.600315
hsa-mir-320a_279540	78.5924	0.276999	0.263792	1.05007	0.293688	0.600566
RNY4-201_236071	22.3108	0.618905	0.589791	1.04936	0.294011	0.600866
hsa-mir-199a-1_176254	39.0627	-0.222534	0.212343	-1.048	0.29464	0.601792
hsa-mir-130a_88728	29.122	-0.33738	0.322156	-1.04726	0.294982	0.601993
hsa-mir-92a-1_354683	151.015	-0.178387	0.170417	-1.04677	0.295207	0.601993
hsa-let-7f-2_311800	20.3624	-0.23571	0.225207	-1.04664	0.295267	0.601993
hsa-mir-301b_73971	11.2876	-0.516014	0.493247	-1.04616	0.295488	NA
hsa-mir-30c-2_112039	15.0815	-0.327286	0.312878	-1.04605	0.295537	NA
RNY4P10-201_164680	349.427	0.652848	0.625448	1.04381	0.296575	0.604044
hsa-mir-26b_15140	25.0371	-0.420388	0.402788	-1.04369	0.296627	0.604044
RNY4P20-201_348553	46.6306	0.605609	0.580538	1.04319	0.296862	0.604162
RNY4P20-201_232000	36.6654	0.529443	0.508216	1.04177	0.297519	0.605139
hsa-mir-339_346375	27.5894	0.36939	0.355014	1.0405	0.29811	0.605979
ENST00000365068.1_278501	200.362	0.671537	0.646195	1.03922	0.298704	0.606257
hsa-mir-15a_160828	238.987	-0.225733	0.217263	-1.03899	0.298811	0.606257
hsa-mir-99b_271313	48.0475	-0.250336	0.241038	-1.03858	0.299002	0.606257
hsa-mir-26b_110402	56.1312	-0.293841	0.282976	-1.03839	0.299087	0.606257
hsa-mir-532_244111	23.308	0.437416	0.421285	1.03829	0.299134	0.606257
hsa-mir-93_145834	777.166	-0.162516	0.156744	-1.03682	0.299818	0.607283
hsa-mir-26a-2_388644	76.6335	-0.207432	0.200235	-1.03594	0.30023	0.607756
RNY4P10-201_105378	133.268	0.269075	0.259881	1.03538	0.300491	0.607926
hsa-mir-221_226133	42.7519	-0.34863	0.337293	-1.03361	0.301318	0.60859
hsa-mir-20a_333730	110.318	-0.303107	0.293306	-1.03342	0.301409	0.60859
hsa-mir-379_228632	53.3667	-0.364858	0.353074	-1.03338	0.301428	0.60859
hsa-mir-30a_355731	47.2499	-0.304912	0.295128	-1.03315	0.301533	0.60859
hsa-mir-590_309700	22.3395	-0.496249	0.480737	-1.03227	0.301947	0.608707
RNY4P7-201_276271	378.721	0.646473	0.6269	1.03122	0.302437	0.608707
hsa-mir-1-2_265226	211.215	0.399116	0.387032	1.03122	0.302437	0.608707
hsa-mir-95_334212	47.8758	0.300563	0.291487	1.03114	0.302477	0.608707
RNY4P10-201_297365	105.285	0.600724	0.582591	1.03113	0.302482	0.608707
hsa-mir-30e_344085	278.953	0.153242	0.148766	1.03009	0.302968	0.609326
RNY4P7-201_276246	23.5353	0.587904	0.571016	1.02958	0.303209	0.609453
hsa-mir-223_319955	75.5598	-0.206604	0.201164	-1.02705	0.304399	0.611484
hsa-mir-92b_322636	34.7189	0.301772	0.294066	1.02621	0.304794	0.611917
hsa-mir-589_201048	12.8192	-0.491384	0.479008	-1.02584	0.304969	NA
RNY4-201_147021	19.8399	-0.574563	0.560161	-1.02571	0.305029	0.612029
hsa_piR_016658|gb|DQ592931|Homo_sapiens_18870	22.6063	-0.446865	0.436964	-1.02266	0.306469	0.614031
hsa-mir-106b_388159	50.2916	0.35714	0.349269	1.02254	0.306528	0.614031
hsa-mir-16-1_73952	188.822	0.243854	0.238498	1.02245	0.306566	0.614031
RNY4P10-201_151847	330.218	0.637492	0.624708	1.02046	0.307509	0.615559
hsa-mir-221_386067	21.1216	-0.341863	0.335429	-1.01918	0.308117	0.616196
hsa-mir-320c-1_74673	64.8562	0.213044	0.209065	1.01903	0.308188	0.616196
hsa-mir-126_139186	15.5426	0.396114	0.38874	1.01897	0.308218	NA
hsa-mir-486-2_242498	83.5189	0.289938	0.284793	1.01806	0.308647	0.616753
hsa-mir-664a_114326	96.1007	-0.190996	0.18784	-1.01681	0.309246	0.617588
ENST00000467525.5_81295	180.664	-0.215617	0.212529	-1.01453	0.31033	0.619176
RNY4P10-201_227525	487.302	0.647651	0.638473	1.01437	0.310404	0.619176
RNY4P20-201_252201	474.879	0.646997	0.638532	1.01326	0.310937	0.619878
hsa-mir-151a_268583	14.6902	-0.39741	0.392228	-1.01321	0.310959	NA
hsa-mir-196b_303320	28.0518	-0.34009	0.33662	-1.01031	0.312347	0.622325
RNY4P17-201_37024	14.6185	0.483639	0.4793	1.00905	0.31295	NA
hsa-mir-151a_39802	170.284	0.19348	0.192023	1.00759	0.313653	0.624563
hsa-mir-148a_157203	52.8595	-0.365605	0.363169	-1.00671	0.314076	0.62504
hsa-let-7i_106014	136.285	-0.162087	0.161171	-1.00569	0.314567	0.625652
RNY4P10-201_237039	38.5481	0.543003	0.540189	1.00521	0.314796	0.625744
hsa-mir-20a_153808	27.5587	-0.396862	0.39529	-1.00398	0.31539	0.626561
hsa-mir-486-2_251876	109.106	0.282607	0.281618	1.00351	0.315615	0.626643
hsa-mir-664a_206739	15.2483	-0.343496	0.342689	-1.00236	0.316172	NA
hsa-mir-26b_140684	24.9302	-0.325162	0.324888	-1.00084	0.316902	0.628833
hsa-mir-148a_102235	17.4901	0.420001	0.419833	1.0004	0.317117	0.628855
hsa-mir-30e_20641	512.954	-0.147967	0.147959	-1.00006	0.317282	0.628855
hsa-mir-15a_293290	14.5087	0.415353	0.415769	0.999	0.317795	NA
RNY4P10-201_201253	338.083	0.622864	0.62383	0.998451	0.318061	0.629595
RNY4-201_318931	17.459	-0.354548	0.355171	-0.998246	0.31816	0.629595
hsa-mir-320a_317470	16.2804	0.343977	0.344616	0.998147	0.318208	0.629595
RNY4P10-201_141230	71.2976	0.564121	0.56567	0.997263	0.318637	0.630078
ENST00000468083.1_199087	21.257	-0.321516	0.322706	-0.996312	0.319098	0.630626
hsa-mir-26a-1_95668	14.9704	-0.37854	0.379965	-0.996251	0.319128	NA
RNY4P10-201_226716	364.751	0.64513	0.648028	0.995527	0.31948	0.631014
hsa-mir-15b_24034	20.5437	-0.39813	0.400904	-0.993081	0.320671	0.633
hsa-mir-376a-1_268398	17.7068	-0.449011	0.452351	-0.992615	0.320898	0.633082
hsa-mir-664a_16640	60.1791	-0.240229	0.242338	-0.991297	0.32154	0.633984
RP11-203J14.1-001_324339	41.753	-0.477529	0.481908	-0.990914	0.321728	0.633987
hsa-mir-146a_119477	12.6604	-0.195364	0.197193	-0.990723	0.321821	NA
ENST00000516950.1_212769	152.778	0.591511	0.597749	0.989564	0.322387	0.634795
hsa-mir-328_99580	216.15	-0.118953	0.120237	-0.989315	0.322509	0.634795
hsa-mir-196b_244690	57.6532	-0.258357	0.261708	-0.987197	0.323546	0.636469
hsa-mir-185_300140	212.303	-0.15957	0.161747	-0.986541	0.323868	0.636668
hsa-mir-106a_275306	28.8206	-0.360651	0.365687	-0.98623	0.32402	0.636668
hsa-mir-144_17506	83.1476	0.349624	0.354818	0.985361	0.324447	0.637139
hsa-let-7a-1_321544	36.25	0.265447	0.269599	0.9846	0.324821	0.637508
hsa-mir-1273h_162654	14.318	0.369688	0.375533	0.984437	0.324901	NA
hsa-mir-425_77676	51.3835	-0.567388	0.576792	-0.983696	0.325265	0.638008
hsa-mir-181a-2_319304	3341.01	0.105133	0.106941	0.983094	0.325561	0.638008
hsa-mir-576_317512	32.1953	0.371806	0.378361	0.982673	0.325768	0.638008
RNY4P10-201_220979	16.4904	0.481459	0.490007	0.982556	0.325826	0.638008
hsa-mir-223_228315	47.3359	0.201737	0.205397	0.982183	0.32601	0.638008
hsa-mir-1306_291227	18.0357	-0.394803	0.402224	-0.981552	0.326321	0.638215
RNY4-201_96012	21.9595	0.564082	0.574899	0.981185	0.326501	0.638215
hsa-let-7c_77183	118.827	-0.173353	0.176741	-0.98083	0.326677	0.638215
tRNA-Phe-GAA-1-6_253779	15.6504	0.355092	0.362038	0.980814	0.326685	NA
RNY4P23-201_122731	17.9976	0.492152	0.502263	0.979871	0.32715	0.63875
hsa-mir-12136_169038	27.6665	0.603157	0.616136	0.978934	0.327612	0.63875
hsa-mir-486-2_369505	88.3736	0.292589	0.298957	0.978698	0.327729	0.63875
hsa-mir-151a_72807	73.7399	-0.232619	0.2377	-0.978627	0.327764	0.63875
tRNA-Ser-GCT-6-1_288120	62.2074	0.211061	0.21575	0.978269	0.327941	0.63875
hsa-let-7b_106573	65.474	-0.159092	0.16269	-0.977883	0.328132	0.63875
hsa-mir-21_76501	20.19	0.332267	0.339872	0.977626	0.328259	0.63875
hsa-mir-654_172269	61.8251	-0.389718	0.399612	-0.975242	0.32944	0.640648
hsa-mir-330_5493	13.1641	-0.354217	0.363244	-0.975147	0.329487	NA
hsa-mir-877_5653	32.4096	0.297804	0.305472	0.974899	0.32961	0.640648
hsa-mir-484_221571	56.2642	-0.162487	0.166839	-0.973912	0.3301	0.641082
hsa-mir-376c_227711	38.0039	-0.368048	0.377992	-0.973693	0.330209	0.641082
hsa-mir-127_48620	23.2943	0.388061	0.399054	0.972453	0.330825	0.641783
hsa-let-7d_222809	34.9401	0.274356	0.282198	0.972211	0.330946	0.641783
hsa-mir-100_295838	32.0904	0.496205	0.51064	0.971733	0.331184	0.64188
hsa-mir-4433a_295873	33.9298	-0.291091	0.299834	-0.970841	0.331628	0.642376
hsa-mir-574_129526	52.9452	-0.171343	0.176586	-0.970311	0.331892	0.642523
ENST00000362330.2_308024	56.414	0.524925	0.541309	0.969733	0.332179	0.642715
hsa-mir-320a_263607	16.4452	-0.496779	0.512851	-0.968662	0.332714	0.643385
hsa-mir-598_84647	15.5222	-0.403072	0.416559	-0.967622	0.333233	NA
hsa-mir-942_151088	97.3342	0.200162	0.206981	0.967056	0.333516	0.644571
hsa-mir-103b-1_98789	468.263	-0.214412	0.221866	-0.966404	0.333842	0.644837
hsa-mir-146b_136615	118.425	-0.205926	0.213251	-0.965648	0.33422	0.645202
hsa-mir-486-2_113521	22.1338	-0.563426	0.583802	-0.965098	0.334496	0.645369
RNY4P9-201_6345	105.635	0.552628	0.573071	0.964327	0.334882	0.645597
hsa-mir-574_233897	17.7417	-0.392977	0.407607	-0.964107	0.334992	0.645597
hsa-let-7a-1_105755	62121.1	-0.166331	0.172723	-0.962995	0.33555	0.646307
hsa-mir-16-1_94708	5480.85	0.204424	0.212663	0.961256	0.336423	0.647071
hsa-mir-361_66493	25.9446	-0.271605	0.282617	-0.961036	0.336534	0.647071
ENST00000364535.1_323918	259.489	0.584822	0.608696	0.960778	0.336664	0.647071
hsa-mir-106b_97144	29.0177	-0.248555	0.258724	-0.960698	0.336704	0.647071
hsa-mir-21_299359	26.5725	-0.182489	0.190385	-0.958528	0.337797	0.648176
hsa-mir-30e_242937	847.461	-0.14315	0.149348	-0.9585	0.337811	0.648176
hsa-mir-3184_139086	78.3299	-0.181327	0.189193	-0.958425	0.337849	0.648176
RP3-481F12.6-001_141227	31.601	-0.353562	0.369255	-0.957499	0.338315	0.648497
hsa-let-7i_384371	36.7995	0.204417	0.213526	0.957339	0.338396	0.648497
hsa-mir-181a-2_292851	100.974	0.163302	0.170779	0.956217	0.338962	0.648972
ENST00000387372.1_349538	62.8941	0.59027	0.617743	0.955526	0.339312	0.648972
tRNA-Gly-GCC-1-5_341330	110.686	0.562803	0.589024	0.955483	0.339333	0.648972
ENST00000416946.1_138916	481.049	0.334158	0.349975	0.954806	0.339676	0.648972
hsa-mir-128-1_86170	132.149	0.139781	0.146416	0.954681	0.339739	0.648972
RNY4P18-201_339557	72.1116	0.572372	0.599598	0.954593	0.339784	0.648972
RNY4P18-201_56522	833.87	-0.133281	0.139678	-0.954198	0.339983	0.64899
hsa-mir-106b_389317	38.7111	-0.306393	0.3216	-0.952714	0.340735	0.649705
hsa-let-7d_256447	41.0422	-0.264496	0.27767	-0.952555	0.340815	0.649705
hsa-mir-1307_295816	85.6484	-0.201607	0.211698	-0.952332	0.340929	0.649705
hsa-let-7f-2_290723	46.3272	-0.185395	0.194767	-0.951881	0.341157	0.64971
RNY4P7-201_53529	312.674	0.590075	0.620103	0.951577	0.341312	0.64971
ENST00000387347.2_249777	16.4519	-0.476753	0.502262	-0.949212	0.342513	0.651519
hsa-mir-221_297165	29.047	-0.292994	0.308755	-0.948953	0.342644	0.651519
hsa-mir-3184_15621	32.8583	0.253006	0.266721	0.94858	0.342834	0.651519
hsa-mir-146b_255464	15.8803	-0.254058	0.267924	-0.948245	0.343005	NA
RNY4P10-201_105738	34.4348	0.505977	0.534061	0.947415	0.343427	0.65193
hsa-mir-378a_152632	106.871	0.26548	0.280218	0.947405	0.343432	0.65193
hsa-mir-4286_160236	21.079	-0.3189	0.337008	-0.946266	0.344013	0.652669
hsa-mir-451b_337338	103.687	0.288534	0.305042	0.945883	0.344208	0.652677
hsa_piR_020364|gb|DQ597971|Homo_sapiens_3466	11.4473	0.341954	0.361643	0.945557	0.344375	NA
RNY4P10-201_383736	20.8749	0.500421	0.529581	0.944938	0.344691	0.652862
ENST00000365160.1_342663	68.1007	-0.279456	0.295854	-0.944575	0.344876	0.652862
hsa-mir-486-2_321265	23.4114	0.355517	0.376381	0.944568	0.344879	0.652862
hsa-mir-223_367280	24.1931	-0.255524	0.270757	-0.94374	0.345303	0.65317
hsa-mir-191_81813	23.7758	0.323752	0.343138	0.943501	0.345424	0.65317
RNY4P10-201_336474	493.072	0.604334	0.641573	0.941958	0.346214	0.654301
ENST00000387347.2_12689	14.6985	-0.460367	0.488977	-0.941491	0.346454	NA
hsa-mir-324_216570	76.0009	-0.187917	0.199836	-0.940358	0.347034	0.655487
RNY4P10-201_159645	61.3664	0.514525	0.547771	0.939307	0.347573	0.656143
RP11-846F4.3-001_241657	29.8992	-0.298582	0.318205	-0.938334	0.348073	0.656723
hsa-mir-328_386000	17.5031	0.37296	0.39847	0.93598	0.349283	0.658643
hsa-mir-15a_225925	341.414	0.297397	0.318394	0.934052	0.350277	0.660153
hsa-mir-25_157275	349.816	0.123752	0.132557	0.93357	0.350526	0.660185
hsa-mir-320a_307545	18.5455	-0.349324	0.374377	-0.933082	0.350778	0.660185
hsa-mir-92b_45138	28.486	0.239181	0.256386	0.932895	0.350874	0.660185
hsa-mir-4433a_90389	18.722	-0.396389	0.425138	-0.932376	0.351142	0.660325
hsa-mir-144_187603	26.6202	0.453511	0.487043	0.931153	0.351775	0.660855
hsa-let-7d_176007	25.8097	-0.282249	0.303141	-0.931082	0.351811	0.660855
hsa-mir-92a-2_151269	35.4641	0.205102	0.220401	0.930585	0.352068	0.660975
RNY4-201_41962	14.8002	0.353429	0.380277	0.929398	0.352683	NA
hsa-mir-140_33301	21.9102	0.34034	0.366661	0.928214	0.353297	0.66268
tRNA-Pro-TGG-3-5_290349	45.3763	-0.232854	0.250933	-0.927951	0.353433	0.66268
hsa-mir-425_312964	121.151	-0.204762	0.220718	-0.927709	0.353559	0.66268
hsa-mir-197_161450	853.917	-0.0949686	0.102472	-0.92678	0.354041	0.663219
hsa-mir-369_336093	25.5773	-0.445884	0.481418	-0.92619	0.354347	0.66334
RNY4P23-201_69062	36.5828	0.363747	0.393024	0.92551	0.354701	0.66334
ENST00000554988.1_155323	21.8712	-0.594124	0.642201	-0.925137	0.354895	0.66334
hsa-mir-221_167661	4575.92	-0.154681	0.167286	-0.92465	0.355148	0.66334
hsa-mir-139_109056	114.864	0.231355	0.250246	0.924509	0.355221	0.66334
hsa-mir-16-1_192231	64369.2	0.19334	0.209148	0.924414	0.355271	0.66334
RNY4P20-201_182889	338.933	0.590012	0.638782	0.923652	0.355668	0.663719
RNY4P20-201_373629	176.386	0.545505	0.591325	0.922514	0.356261	0.664072
hsa-mir-92a-1_212023	48.9882	0.197977	0.214702	0.922103	0.356475	0.664072
ENST00000387342.1_296025	19.6229	-0.549412	0.595985	-0.921856	0.356604	0.664072
[truncated: 1,783 more rows]

## Sheet: control vs MCI
	baseMean	log2FoldChange	lfcSE	stat	pvalue	padj
hsa-mir-320c-1_167670	30.0785	1.71462	0.376376	4.5556	5.22356e-06	0.0129103
RNY4P10-201_33029	59.1143	3.73257	0.829282	4.50096	6.76466e-06	0.0129103
hsa-mir-223_128809	33.8716	-1.18226	0.271913	-4.34793	1.37429e-05	0.0136528
hsa-mir-223_162627	215.991	-0.764988	0.176302	-4.33909	1.43073e-05	0.0136528
hsa-mir-486-2_148163	31.8356	1.82739	0.435184	4.19913	2.67943e-05	0.0204547
hsa-let-7d_86986	14.1426	-1.8422	0.4448	-4.14164	3.44836e-05	0.0219373
RP11-382F24.7-001_246990	17.1462	1.9247	0.501114	3.84085	0.000122609	0.0668568
hsa-mir-2110_317216	54.0381	1.39275	0.380494	3.66039	0.000251835	0.120157
hsa-mir-7706_274080	16.046	-1.88759	0.532657	-3.54372	0.000394524	0.156559
RP11-317N8.1-001_313920	23.2587	2.08569	0.59027	3.53346	0.000410163	0.156559
hsa-mir-181a-2_338902	504.154	-0.653832	0.186904	-3.49822	0.000468379	0.162527
hsa-mir-181a-2_16363	705.846	-0.485878	0.14197	-3.4224	0.0006207	0.190262
hsa-mir-486-2_352405	65.86	1.22244	0.359199	3.40325	0.00066589	0.190262
hsa-mir-181a-2_327648	20.9963	1.66533	0.497465	3.34764	0.000815017	0.190262
RNY4P10-201_165553	77.3906	3.05122	0.912562	3.34357	0.000827069	0.190262
hsa-mir-223_11016	22235	-0.412254	0.123499	-3.33811	0.0008435	0.190262
hsa-mir-125a_16373	336.38	1.12715	0.339823	3.31689	0.000910267	0.190262
hsa-mir-486-2_139208	44.4988	1.90893	0.577599	3.30494	0.000949962	0.190262
hsa-mir-23a_199622	78.3868	1.13544	0.344279	3.29804	0.000973639	0.190262
hsa-let-7a-1_169708	15.0157	-0.966124	0.293747	-3.28897	0.00100555	0.190262
hsa-mir-3184_244505	78.9173	1.12181	0.34283	3.27221	0.00106709	0.190262
tRNA-Leu-TAG-1-1_351047	329.132	1.09428	0.335207	3.26449	0.00109661	0.190262
hsa-mir-486-2_305222	375.5	0.915276	0.284636	3.2156	0.00130173	0.21603
hsa-mir-22_284493	57.6148	1.11761	0.355179	3.1466	0.00165179	0.262703
RNY4P10-201_299239	158.279	2.67427	0.863633	3.09653	0.00195799	0.293255
hsa-mir-191_374673	24.4875	1.57774	0.510495	3.0906	0.00199755	0.293255
RNY4P10-201_170392	80.2385	-1.01069	0.332918	-3.03585	0.0023986	0.303314
hsa-mir-223_125617	2500.26	-0.349332	0.115406	-3.02699	0.00247002	0.303314
hsa-mir-150_12904	22.2352	1.2785	0.423858	3.01635	0.0025584	0.303314
hsa_piR_015249|gb|DQ590830|Homo_sapiens_121389	27.2998	1.69732	0.562899	3.01532	0.00256707	0.303314
hsa-mir-146a_140852	52.9386	-0.917649	0.305288	-3.00585	0.00264844	0.303314
hsa-mir-7-1_221672	288.152	-0.721572	0.240704	-2.99775	0.00271979	0.303314
hsa-mir-425_121535	81.1091	0.721362	0.240806	2.99561	0.00273897	0.303314
CTB-25B13.1-003_296738	49.5062	1.42189	0.477369	2.97859	0.00289579	0.303314
hsa-let-7i_288065	106.538	-1.39101	0.467365	-2.97628	0.00291773	0.303314
hsa-mir-3184_102770	1326.94	0.982812	0.330764	2.97134	0.002965	0.303314
hsa-mir-22_249460	92.7172	0.829696	0.279654	2.96687	0.00300849	0.303314
hsa-let-7g_46008	1765.97	-0.709276	0.239157	-2.96573	0.00301963	0.303314
hsa-mir-221_246078	35.1091	-1.42875	0.483221	-2.95672	0.00310927	0.30431
RNY4P10-201_319436	40.5277	2.43157	0.829596	2.93103	0.00337845	0.309478
hsa-mir-486-2_160534	187.21	0.879631	0.300175	2.9304	0.0033853	0.309478
hsa-mir-486-2_49054	279.033	0.598668	0.204424	2.92856	0.00340531	0.309478
hsa-mir-425_57677	67.6043	0.794715	0.273509	2.90562	0.00366521	0.313771
hsa-mir-21_190634	23.009	-0.973679	0.335141	-2.90528	0.00366925	0.313771
RP1-257A7.1-005_389193	14.9578	-1.30479	0.450414	-2.89687	0.0037691	0.313771
RP11-193H5.6-001_377332	63.3478	1.34236	0.463765	2.89449	0.00379777	0.313771
hsa-let-7d_351699	1323.66	-0.79639	0.276625	-2.87895	0.00399005	0.313771
ENST00000416946.1_272024	516.533	1.45629	0.507424	2.86996	0.00410518	0.313771
hsa-mir-221_176407	306.574	-0.586181	0.204372	-2.8682	0.00412816	0.313771
RP3-481F12.6-001_351854	123.548	1.3144	0.458547	2.86643	0.00415127	0.313771
RNY4P23-201_181378	38.4562	-1.38322	0.485175	-2.85098	0.00435845	0.313771
hsa-mir-486-2_192408	74.5182	0.983027	0.34715	2.8317	0.00463008	0.313771
tRNA-Leu-TAG-1-1_376687	14.883	-1.19406	0.422794	-2.82422	0.00473954	0.313771
hsa-mir-10399_128854	39.3403	-0.855696	0.303485	-2.81956	0.00480888	0.313771
hsa-mir-23a_310408	419.54	0.837397	0.297268	2.81698	0.00484783	0.313771
hsa-mir-484_271349	50.9791	0.740605	0.262954	2.81648	0.00485528	0.313771
tRNA-Leu-TAG-1-1_260498	12.6248	1.3239	0.470225	2.81547	0.00487067	0.313771
hsa-mir-625_63616	41.7819	-1.02955	0.366769	-2.80708	0.00499921	0.313771
ENST00000420042.1_236731	23.2103	1.63416	0.5823	2.80638	0.00501012	0.313771
hsa-let-7g_98120	39.1454	-0.57733	0.205826	-2.80494	0.00503256	0.313771
hsa-mir-486-2_356320	48.788	1.05299	0.37564	2.80318	0.00506015	0.313771
hsa-mir-23a_282670	945.826	0.761824	0.272103	2.79976	0.00511403	0.313771
hsa-mir-25_16193	19.8795	0.589343	0.210804	2.79569	0.00517883	0.313771
hsa-mir-320a_295453	26.3304	1.48274	0.532682	2.78353	0.00537705	0.32069
hsa-let-7a-2_25678	39.3897	-0.885204	0.318865	-2.77611	0.00550136	0.322733
hsa-mir-199a-1_45639	443.361	-0.60368	0.217819	-2.77147	0.00558039	0.322733
hsa-mir-486-2_297819	22.6907	0.972784	0.352438	2.76016	0.00577735	0.328515
hsa-mir-130b_114433	31.9506	-0.636039	0.230789	-2.75593	0.00585251	0.328515
hsa-mir-29a_350967	74.528	0.794612	0.288977	2.74974	0.0059643	0.329938
tRNA-Leu-CAG-2-2_309767	108.717	0.853812	0.311597	2.74012	0.00614171	0.334899
RNY3-201_80001	16.2753	1.2066	0.442066	2.72946	0.00634383	0.336733
hsa-mir-3184_106639	5940.41	0.76655	0.281089	2.72707	0.00638993	0.336733
hsa-mir-486-2_113120	182.64	0.770257	0.282716	2.72449	0.00644001	0.336733
hsa-mir-4433a_369930	257.81	0.969098	0.357835	2.70823	0.00676438	0.337963
hsa-mir-126_269354	257.967	-0.42166	0.155951	-2.7038	0.0068552	0.337963
hsa-mir-3184_110948	926.564	0.8096	0.299473	2.70342	0.00686306	0.337963
hsa-mir-744_7389	13.5936	-1.22584	0.45358	-2.7026	0.00687995	0.337963
hsa-mir-191_253879	43.9689	1.07898	0.400019	2.69732	0.0069901	0.337963
hsa-mir-139_15057	58.9018	0.858379	0.318261	2.69709	0.00699477	0.337963
hsa-mir-486-2_353802	23.1543	0.968252	0.360495	2.68589	0.0072336	0.33884
hsa-mir-625_373055	72.1366	-0.844092	0.314305	-2.68559	0.00724026	0.33884
hsa-mir-223_97835	106.526	-0.795967	0.296583	-2.68379	0.00727924	0.33884
hsa-mir-20a_87860	1092.54	-0.449104	0.167664	-2.67859	0.00739325	0.34
ENST00000416946.1_2607	924.091	1.31967	0.494205	2.67029	0.00757861	0.344376
hsa-mir-3184_40887	1322.66	0.841564	0.317059	2.65429	0.00794761	0.353679
hsa-let-7i_270119	3110.36	-0.644331	0.242833	-2.65339	0.00796867	0.353679
hsa_piR_009295|gb|DQ582567|Homo_sapiens_64163	43.9395	2.14701	0.811029	2.64727	0.0081144	0.353777
hsa-mir-199a-1_259740	31.7893	-1.3014	0.491923	-2.64553	0.00815625	0.353777
hsa-mir-486-2_23675	2773.96	0.61106	0.232284	2.63066	0.00852194	0.360781
hsa-let-7i_106014	142.429	-0.402064	0.152927	-2.62912	0.00856054	0.360781
hsa-mir-486-2_159889	50.9159	0.899967	0.342768	2.62558	0.00865005	0.360781
hsa-mir-103b-1_197495	5400.42	-0.439812	0.168031	-2.61745	0.00885902	0.360781
hsa-mir-191_47694	13.5014	1.20414	0.461523	2.60907	0.00907895	0.360781
hsa-mir-223_33628	14.655	-1.10058	0.421884	-2.60872	0.00908817	0.360781
hsa-mir-199a-1_318521	5254.48	-0.532369	0.204095	-2.60844	0.00909554	0.360781
hsa-let-7f-2_373834	48.5662	-1.07559	0.412489	-2.60756	0.00911903	0.360781
hsa-let-7d_56389	12.5209	-1.55596	0.597134	-2.60571	0.0091684	0.360781
hsa-mir-223_379138	34074.5	-0.34369	0.132282	-2.59816	0.00937241	0.365046
RP11-215L17.2-001_146417	52.4595	1.21637	0.469098	2.59299	0.00951465	0.366843
hsa-mir-146a_91637	167.284	2.12166	0.820248	2.58661	0.00969245	0.368308
hsa-let-7b_322101	13.5032	1.01766	0.394919	2.57688	0.00996954	0.368308
hsa-mir-92a-1_209241	56.0718	0.616709	0.239441	2.57563	0.0100059	0.368308
RNY4P10-201_97844	191.916	2.42864	0.943197	2.5749	0.0100268	0.368308
hsa-mir-103b-1_35272	17.6237	-1.49291	0.58016	-2.57327	0.0100742	0.368308
hsa-mir-486-2_31931	22.993	0.94147	0.366206	2.57087	0.0101443	0.368308
hsa-mir-486-2_46607	1338.19	0.54552	0.212428	2.56802	0.0102281	0.368308
hsa-mir-486-2_24765	382.197	0.650688	0.253885	2.56292	0.0103795	0.370268
hsa-let-7d_251956	51.4387	-0.861907	0.339569	-2.53824	0.0111413	0.392423
hsa-mir-29c_188400	80.9929	0.828586	0.326834	2.53519	0.0112386	0.392423
ENST00000416946.1_138916	673.627	1.24399	0.491111	2.533	0.011309	0.392423
hsa-mir-126_182124	18.0009	-0.451192	0.178451	-2.52838	0.0114589	0.393675
hsa-let-7d_108744	12.8409	-0.691425	0.273771	-2.52556	0.0115514	0.393675
hsa-mir-17_34235	328.435	-0.761706	0.302439	-2.51854	0.0117841	0.397708
hsa-mir-223_158608	2103.16	-0.421529	0.167556	-2.51575	0.0118781	0.397708
hsa-mir-21_101079	29.6153	-0.778745	0.310929	-2.50458	0.0122598	0.40102
hsa-mir-223_12237	1446.97	-0.343671	0.137283	-2.50337	0.0123015	0.40102
RNY3-201_111402	28.3397	1.29354	0.516764	2.50316	0.012309	0.40102
hsa-mir-425_329176	552.459	0.468361	0.187297	2.50063	0.0123973	0.40102
RNY4P10-201_296114	38.7793	1.9868	0.798691	2.48757	0.012862	0.401981
hsa-mir-1843_139194	13.3804	-1.34104	0.539139	-2.48737	0.012869	0.401981
hsa-mir-92b_380353	17.934	0.745895	0.301012	2.47796	0.0132135	0.401981
hsa-mir-744_297711	1335.87	-0.356703	0.144045	-2.47633	0.013274	0.401981
hsa-mir-342_290655	220.692	0.865216	0.349707	2.47412	0.0133566	0.401981
hsa-let-7i_249774	1622.08	-0.547419	0.221441	-2.47207	0.0134332	0.401981
hsa-mir-451b_262653	35.8573	1.2736	0.516119	2.46765	0.0136003	0.401981
hsa-let-7b_51999	30.5128	0.71418	0.289824	2.46418	0.0137326	0.401981
hsa-mir-223_126531	23.8701	-0.824095	0.335029	-2.45977	0.0139026	0.401981
RP11-9F19.1-002_270746	24.7991	1.88996	0.768853	2.45815	0.0139654	0.401981
hsa-mir-451b_380114	14.9246	1.10552	0.450111	2.45611	0.0140451	0.401981
hsa-mir-486-2_34632	50.1622	1.19415	0.486988	2.45211	0.0142022	0.401981
hsa-let-7f-2_52467	30.6308	-0.800217	0.326339	-2.45211	0.0142023	0.401981
tRNA-Leu-CAG-2-2_88942	35.4858	1.13764	0.463987	2.45189	0.0142109	0.401981
hsa-mir-99b_369949	19.5732	-1.02795	0.419508	-2.45036	0.0142712	0.401981
hsa-mir-625_83812	38.1287	-1.27414	0.520507	-2.44787	0.0143702	0.401981
hsa-mir-30e_273785	243.18	-0.334024	0.136504	-2.44699	0.0144055	0.401981
ENST00000416946.1_362172	1183.07	1.24974	0.511085	2.44527	0.0144744	0.401981
hsa-mir-92a-2_236612	58.4417	0.903888	0.369897	2.44362	0.0145406	0.401981
hsa-let-7b_47738	557.888	0.471306	0.193133	2.44032	0.0146741	0.401981
hsa-let-7g_253580	75.6367	-0.561008	0.230417	-2.43475	0.0149022	0.401981
hsa-mir-29c_97594	14.8193	-0.98651	0.405493	-2.43286	0.01498	0.401981
hsa-let-7g_252420	23975.9	-0.452683	0.186316	-2.42965	0.0151136	0.401981
RNY4P27-201_61914	17.3702	-1.15931	0.47762	-2.42727	0.015213	0.401981
tRNA-Ser-GCT-6-1_373174	146.615	-0.41987	0.173343	-2.4222	0.015427	0.401981
hsa-mir-18a_235875	91.5241	-0.806962	0.333453	-2.42002	0.0155198	0.401981
hsa-mir-342_304317	487.179	0.651589	0.269254	2.41998	0.0155215	0.401981
hsa-mir-486-2_256116	89.4483	0.832013	0.343823	2.41989	0.0155253	0.401981
hsa-mir-142_235814	839.469	0.461532	0.190812	2.41877	0.0155729	0.401981
RNY4P7-201_155690	23.5923	1.84332	0.762187	2.41846	0.0155864	0.401981
hsa-let-7g_337851	24.2626	-0.612368	0.253752	-2.41325	0.0158109	0.405036
hsa-mir-484_136842	1593.85	0.369863	0.153693	2.4065	0.0161061	0.405091
hsa-mir-197_25332	12.04	-1.17786	0.489506	-2.40623	0.0161181	0.405091
hsa-let-7b_93951	17.9817	1.49714	0.622271	2.40593	0.0161315	0.405091
RNY4P10-201_380206	308.712	2.29491	0.957914	2.39574	0.016587	0.411842
hsa-mir-4433a_103896	42.674	0.991826	0.414107	2.39509	0.0166161	0.411842
hsa-mir-4446_249885	48.3196	-0.868935	0.36464	-2.383	0.0171724	0.422884
hsa-let-7d_189652	8601.54	-0.513458	0.215905	-2.37817	0.0173988	0.423167
hsa-mir-19b-2_81413	781.321	-0.477197	0.20072	-2.37742	0.0174341	0.423167
hsa-mir-199a-1_337750	799.601	-0.410177	0.172657	-2.37568	0.0175165	0.423167
hsa-mir-548k_77185	32.2362	-0.914792	0.385812	-2.37108	0.017736	0.424024
hsa-let-7e_335044	47.1217	-0.710399	0.29971	-2.37029	0.0177741	0.424024
ENST00000362765.1_212617	36.9599	-0.761662	0.321793	-2.36693	0.0179361	0.425232
hsa-mir-451b_373012	114.595	1.12	0.474104	2.36235	0.0181593	0.426933
hsa-mir-223_243506	7178.48	-0.284791	0.120701	-2.35948	0.0183007	0.426933
hsa-mir-126_4866	16.6148	-0.829573	0.35195	-2.35708	0.0184195	0.426933
hsa-let-7a-1_27670	13.1347	1.10287	0.468042	2.35635	0.0184553	0.426933
ENST00000387449.1_165196	27.6288	0.982506	0.420086	2.33882	0.0193445	0.444808
RNY4P23-201_215724	49.6309	-0.895091	0.383596	-2.33342	0.0196262	0.448582
hsa-mir-221_300710	46.5551	-0.65234	0.27997	-2.33003	0.0198044	0.449566
hsa-mir-486-2_276514	50.5854	1.09688	0.471412	2.32679	0.0199763	0.449566
hsa-let-7i_24180	160.434	0.500711	0.215286	2.3258	0.0200295	0.449566
hsa-let-7g_188854	1313.83	-0.426914	0.18372	-2.32372	0.0201404	0.449566
hsa-mir-106b_239215	30.396	0.864571	0.373639	2.31392	0.020672	0.450512
hsa-mir-652_1558	73.2798	0.654833	0.283296	2.31148	0.0208065	0.450512
hsa-mir-25_224288	1273.59	0.462266	0.200126	2.30988	0.020895	0.450512
hsa-mir-146b_62721	104.084	-0.523458	0.226655	-2.30949	0.0209164	0.450512
hsa-mir-1843_206433	13.1079	1.30086	0.56401	2.30645	0.0210857	0.450512
hsa-mir-181a-2_142095	14.3504	-1.26801	0.550486	-2.30343	0.0212544	0.450512
hsa-mir-15a_53605	123.22	-0.41167	0.179008	-2.29973	0.0214637	0.450512
hsa-mir-493_368823	22.1004	-1.24683	0.542198	-2.29959	0.0214717	0.450512
hsa-mir-223_66968	30.4025	-0.38481	0.16749	-2.2975	0.0215901	0.450512
hsa-mir-98_98498	397.804	-0.750923	0.326898	-2.29711	0.0216123	0.450512
hsa-let-7b_179434	89.3067	0.685612	0.298476	2.29704	0.0216164	0.450512
hsa-mir-3184_177888	102.548	0.804235	0.350998	2.29128	0.0219471	0.450512
hsa-mir-543_309573	23.9418	-1.17734	0.513836	-2.29127	0.0219478	0.450512
hsa-mir-548l_98939	16.535	1.34367	0.587202	2.28825	0.022123	0.450512
hsa-mir-152_243687	94.5777	-0.543326	0.238116	-2.28177	0.0225028	0.450512
hsa-mir-20a_106686	190.629	-0.82842	0.363331	-2.28007	0.0226037	0.450512
hsa-mir-92a-1_389272	23.3097	1.04852	0.459985	2.27946	0.0226398	0.450512
hsa-mir-30d_383948	13.4371	0.538205	0.236242	2.27819	0.022715	0.450512
hsa-mir-29b-2_286213	13.2545	1.19405	0.524139	2.27812	0.0227192	0.450512
hsa-let-7b_328675	9667.1	0.51093	0.224458	2.27629	0.0228289	0.450512
hsa-let-7b_295024	69.641	0.818735	0.359931	2.2747	0.0229238	0.450512
hsa-let-7d_275847	1869.96	-0.294106	0.129395	-2.27293	0.0230306	0.450512
hsa-let-7b_106018	302.084	0.524887	0.230956	2.27267	0.0230458	0.450512
hsa-mir-486-2_251876	133.821	0.814968	0.358856	2.27102	0.0231459	0.450512
hsa-mir-451b_295282	15582.8	0.81532	0.359247	2.26953	0.0232364	0.450512
hsa-mir-320a_47918	48.6042	-0.813632	0.358543	-2.26928	0.0232515	0.450512
hsa-mir-17_386691	999.419	-0.365231	0.161211	-2.26555	0.0234792	0.450585
hsa-mir-486-2_371957	75.6766	0.536476	0.237086	2.26279	0.0236487	0.450585
hsa-mir-486-2_146579	35.3729	0.887868	0.392381	2.26277	0.0236498	0.450585
hsa_piR_020009|gb|DQ597484|Homo_sapiens_102954	19.2574	1.09461	0.484015	2.26151	0.0237274	0.450585
hsa-mir-320c-1_334080	89.9497	0.719676	0.318759	2.25774	0.0239616	0.451589
hsa-mir-363_105467	30.0728	0.993966	0.441054	2.25362	0.0242203	0.451589
hsa-mir-190a_290447	43.609	-1.14204	0.506772	-2.25356	0.0242237	0.451589
hsa-mir-28_345222	522.724	-0.316425	0.14044	-2.25309	0.0242535	0.451589
RNY4P18-201_341754	51.1185	-1.18176	0.525569	-2.24854	0.0245417	0.452619
hsa-mir-99a_324028	45.3317	0.882612	0.392538	2.24847	0.024546	0.452619
hsa-mir-21_252221	240.502	-0.381498	0.170319	-2.2399	0.0250971	0.460492
hsa-mir-103b-1_98789	485.577	-0.543067	0.243101	-2.23392	0.0254885	0.460492
hsa-mir-486-2_373964	25.0581	0.874393	0.391896	2.23119	0.0256687	0.460492
hsa-mir-486-2_78120	477.873	0.71982	0.322919	2.2291	0.0258071	0.460492
hsa-mir-320c-1_74673	79.1971	0.707423	0.317514	2.228	0.0258804	0.460492
hsa-mir-486-2_205817	71.0015	0.904612	0.406532	2.2252	0.0260681	0.460492
hsa_piR_015249|gb|DQ590830|Homo_sapiens_2062	79.7748	0.708267	0.31838	2.22459	0.0261086	0.460492
hsa-mir-144_246958	65.9213	1.01612	0.456791	2.22447	0.026117	0.460492
RNY4-201_325012	15.5619	1.16154	0.522852	2.22155	0.0263138	0.460492
RNY3P2-201_299682	108.792	-0.932327	0.420671	-2.21629	0.0266719	0.460492
hsa-mir-486-2_42573	18.8617	0.834041	0.376432	2.21565	0.0267156	0.460492
hsa-let-7d_338544	477.926	-0.558591	0.252225	-2.21465	0.0267841	0.460492
hsa-mir-4433a_177437	168.571	0.748582	0.338094	2.21412	0.0268205	0.460492
hsa-mir-223_340143	241.73	-0.408035	0.18471	-2.20905	0.027171	0.460492
tRNA-Gly-GCC-3-1_27631	56.0356	-0.681514	0.308534	-2.20888	0.0271832	0.460492
hsa-mir-486-2_70222	822.956	0.700229	0.317145	2.20792	0.02725	0.460492
hsa-mir-324_194711	11.5904	-1.13335	0.51373	-2.20612	0.0273757	0.460492
RP11-317N8.1-001_101665	27.5745	1.2346	0.55964	2.20607	0.0273793	0.460492
RP11-752G15.5-002_330089	201.254	-0.689265	0.312478	-2.2058	0.0273979	0.460492
hsa-mir-17_141595	175.5	-0.629389	0.285568	-2.20399	0.0275249	0.460492
hsa-mir-25_244339	719.181	0.28407	0.128927	2.20335	0.0275704	0.460492
hsa-mir-342_74532	29.2973	0.943746	0.428494	2.20247	0.027632	0.460492
hsa-mir-93_198675	644.325	-0.652213	0.296348	-2.20083	0.0277477	0.460492
hsa-mir-181a-2_357750	65.8795	-0.515612	0.234634	-2.19751	0.0279839	0.4624
hsa-mir-486-2_295307	31.6467	1.07273	0.489155	2.19303	0.0283052	0.465694
hsa-let-7i_298376	21.4246	-0.9924	0.454265	-2.18463	0.0289161	0.473702
RNY4P10-201_211782	74.6456	1.80454	0.829498	2.17547	0.0295952	0.479927
hsa-let-7g_91939	19.8297	-0.522306	0.240246	-2.17405	0.0297017	0.479927
hsa-mir-92a-1_126392	18.6411	0.769015	0.354066	2.17195	0.0298591	0.479927
hsa-mir-199a-1_192709	424.656	-0.497013	0.229406	-2.16652	0.0302717	0.479927
hsa-mir-342_325892	35.1635	0.749822	0.346549	2.16368	0.0304887	0.479927
hsa-mir-26a-2_107274	28.064	0.996903	0.46122	2.16145	0.0306606	0.479927
ENST00000387400.1_3859	45.0327	1.15912	0.536312	2.16128	0.0306734	0.479927
hsa-mir-486-2_387945	26.3175	0.89822	0.415705	2.16072	0.0307173	0.479927
hsa-mir-221_98005	138.602	-0.610558	0.28267	-2.15997	0.0307753	0.479927
hsa-let-7d_14272	494.435	0.404644	0.187471	2.15844	0.0308938	0.479927
RNY4-201_139058	70.4086	1.27502	0.590738	2.15836	0.0308999	0.479927
RP3-481F12.6-001_141227	52.8091	1.08374	0.503042	2.15437	0.0312113	0.479927
hsa-mir-6511a-4_166495	57.7241	0.815081	0.380166	2.14402	0.0320316	0.479927
hsa-mir-486-2_215223	110528	0.721253	0.336472	2.14358	0.0320667	0.479927
hsa-mir-30a_107952	79.7056	0.770242	0.359587	2.14202	0.0321918	0.479927
hsa-mir-324_232568	81.8502	-0.473126	0.22103	-2.14056	0.0323099	0.479927
hsa-mir-24-2_221992	777.078	0.463323	0.216463	2.14042	0.0323209	0.479927
hsa-mir-26a-2_231466	1182.83	-0.438873	0.205102	-2.13977	0.0323732	0.479927
hsa-mir-223_202081	13.3336	-1.01787	0.475739	-2.13955	0.032391	0.479927
hsa-let-7g_351822	29.7218	-0.789648	0.369201	-2.13881	0.0324514	0.479927
RP11-317N8.1-001_8685	31.1057	1.06404	0.497764	2.13763	0.0325465	0.479927
hsa-mir-451b_300149	10464	0.717088	0.335608	2.13668	0.0326236	0.479927
hsa-let-7b_312702	4071.84	0.494678	0.231533	2.13653	0.0326359	0.479927
hsa-mir-223_100383	11.2135	-1.03535	0.48461	-2.13646	0.0326419	0.479927
CTD-2231E14.1-015_362951	13.8583	0.890656	0.416897	2.13639	0.0326473	0.479927
RNY4P23-201_69062	29.1528	-0.988297	0.463392	-2.13274	0.0329457	0.479927
hsa-mir-486-2_386450	126.759	0.646111	0.303055	2.13199	0.0330073	0.479927
hsa-mir-143_256394	2425.24	-0.608544	0.285922	-2.12835	0.0333078	0.479927
hsa-mir-10b_163854	162.962	0.743086	0.349201	2.12796	0.0333404	0.479927
hsa-let-7b_74169	20.3324	0.853393	0.401161	2.12731	0.0333945	0.479927
hsa-mir-486-2_329588	68.5323	0.859785	0.404389	2.12613	0.0334922	0.479927
hsa-let-7b_107737	13.9403	0.739646	0.348118	2.1247	0.0336118	0.479927
hsa-mir-486-2_236747	27484.3	0.428156	0.201518	2.12465	0.0336159	0.479927
hsa-mir-221_10849	339.632	-0.456715	0.21497	-2.12456	0.0336238	0.479927
hsa-let-7i_251029	18397.9	-0.405551	0.190968	-2.12366	0.0336987	0.479927
hsa-mir-106b_324484	182.322	0.482332	0.227328	2.12174	0.0338593	0.479927
hsa-mir-425_345566	197.549	-0.404047	0.190527	-2.12069	0.0339482	0.479927
hsa-mir-22_62933	49.2273	-0.717702	0.339036	-2.11689	0.0342694	0.48268
hsa-mir-23a_68435	32.4412	1.06166	0.502996	2.11067	0.0348009	0.484528
hsa-mir-222_196596	109.172	-0.531205	0.251799	-2.10964	0.0348895	0.484528
hsa-mir-486-2_197874	73.6386	0.741587	0.351558	2.10943	0.0349078	0.484528
hsa-mir-130a_88728	29.7026	-0.881683	0.41809	-2.10884	0.0349588	0.484528
hsa_piR_016735|gb|DQ593039|Homo_sapiens_115471	12.5323	0.968018	0.459222	2.10795	0.0350353	0.484528
hsa-mir-199a-1_83010	383.544	-0.686997	0.32707	-2.10046	0.0356883	0.490309
hsa-mir-20a_386050	114.498	-0.638941	0.304227	-2.10021	0.0357102	0.490309
hsa-mir-484_202142	12.1133	1.02238	0.487711	2.09627	0.0360579	0.492362
hsa-mir-146b_354351	1954.14	-0.240084	0.114619	-2.09463	0.0362042	0.492362
hsa-mir-374c_237289	12.9748	-1.1042	0.527279	-2.09415	0.0362467	0.492362
hsa-mir-425_342583	66.1311	-0.726073	0.347141	-2.09158	0.0364762	0.493722
hsa-mir-126_26616	233.983	-0.347975	0.166609	-2.08858	0.0367457	0.495613
hsa-mir-30a_275642	30.8934	0.872379	0.418356	2.08525	0.0370462	0.496298
hsa-mir-221_244546	152.853	-0.472962	0.226986	-2.08366	0.0371908	0.496298
hsa-mir-92a-2_34549	25.292	0.559242	0.268734	2.08102	0.0374318	0.496298
hsa-mir-361_205650	16.3978	-0.714774	0.343637	-2.08002	0.0375233	0.496298
hsa-mir-106b_119634	78.6199	-0.774516	0.372732	-2.07794	0.0377144	0.496298
hsa-mir-27b_352234	21.8238	-0.817944	0.393716	-2.0775	0.0377556	0.496298
hsa-let-7b_285339	40.9528	0.400693	0.19289	2.07731	0.0377725	0.496298
hsa-mir-100_295838	43.147	1.37254	0.663014	2.07015	0.0384381	0.496298
hsa-mir-223_35558	39.574	-0.875651	0.423204	-2.0691	0.0385371	0.496298
hsa-mir-125b-1_317477	51.5883	0.722605	0.349243	2.06906	0.0385403	0.496298
hsa-mir-26b_16105	198.904	-0.540414	0.261397	-2.06741	0.0386953	0.496298
hsa-mir-30d_211772	289.582	1.57375	0.761644	2.06625	0.0388047	0.496298
RP3-481F12.6-001_924	25.238	1.33713	0.648292	2.06254	0.039156	0.496298
RNY3-201_227725	47.0673	-0.655644	0.317882	-2.06254	0.0391563	0.496298
RNY4P10-201_211476	40.9052	1.6246	0.788233	2.06106	0.0392969	0.496298
hsa-mir-345_175733	92.225	0.525219	0.255098	2.05889	0.0395045	0.496298
hsa-mir-30d_386110	120.125	0.354501	0.172219	2.05843	0.0395485	0.496298
hsa-mir-128-1_74369	49.9101	-0.519188	0.252585	-2.0555	0.0398306	0.496298
hsa-mir-221_78341	1163.22	-0.372986	0.181489	-2.05514	0.0398654	0.496298
hsa-mir-29c_236693	14.6191	0.86733	0.422031	2.05513	0.0398661	0.496298
RNY4P23-201_12764	50.8013	-0.982552	0.478263	-2.05442	0.0399351	0.496298
hsa-mir-92a-2_186498	38.2441	1.12112	0.546539	2.05132	0.0402362	0.496298
hsa-mir-486-2_338827	33266.4	0.650614	0.317363	2.05006	0.0403585	0.496298
hsa-mir-146a_258540	247.251	-0.363297	0.177222	-2.04995	0.0403691	0.496298
hsa-mir-98_316343	4595.16	-0.45936	0.224211	-2.04878	0.0404833	0.496298
hsa-mir-330_90467	28.7641	-0.719108	0.351255	-2.04725	0.0406331	0.496298
hsa-mir-486-2_250900	61630.5	0.665726	0.325229	2.04695	0.0406635	0.496298
hsa-mir-493_346236	446.287	-0.71004	0.346907	-2.04677	0.0406805	0.496298
hsa-mir-181c_236095	74.2196	-0.581608	0.284191	-2.04654	0.0407033	0.496298
hsa-mir-21_35039	22.4623	-0.897074	0.438467	-2.04593	0.0407631	0.496298
hsa-mir-320a_329546	28.6126	-0.835743	0.40862	-2.04528	0.0408272	0.496298
hsa-mir-151a_83353	30.5128	-0.742011	0.363303	-2.04241	0.0411112	0.496795
RNY4P10-201_39419	29.2375	1.57906	0.773201	2.04223	0.0411284	0.496795
hsa-mir-877_288264	20.5939	-1.07183	0.525218	-2.04073	0.0412773	0.49702
hsa-mir-181c_356766	13.1344	-1.06522	0.523346	-2.03539	0.0418113	0.501867
hsa-mir-1307_289649	481.771	-0.406535	0.200083	-2.03184	0.0421703	0.503874
hsa-mir-320a_199845	27.7531	-0.733435	0.361304	-2.02997	0.0423599	0.503874
RNY4P23-201_236645	18.333	-1.00878	0.496981	-2.02982	0.0423745	0.503874
hsa-mir-6511a-4_175927	21.9938	0.882777	0.436491	2.02244	0.043131	0.511157
hsa-mir-223_280002	23.2652	-0.987933	0.488775	-2.02124	0.0432548	0.511157
hsa-mir-21_129437	30050.6	-0.434027	0.215194	-2.01691	0.0437049	0.511652
hsa-mir-126_365410	72.4096	-0.501474	0.248636	-2.0169	0.0437058	0.511652
RNY4P10-201_100942	40.8594	1.58882	0.788862	2.01406	0.044003	0.511652
RNY4P10-201_93444	22.8076	1.5369	0.76438	2.01065	0.0443625	0.511652
hsa-mir-425_84590	104.773	-0.430994	0.214389	-2.01034	0.044395	0.511652
RNY4P10-201_8397	64.3726	1.67156	0.83172	2.00976	0.0444565	0.511652
ENST00000445125.2_17369	46.9383	1.27528	0.634594	2.0096	0.0444737	0.511652
hsa-mir-223_246221	12.9612	-1.0718	0.533396	-2.00938	0.0444966	0.511652
hsa-mir-12136_42680	41.1799	0.923963	0.459839	2.00932	0.0445031	0.511652
RNY4P7-201_106158	38.9273	1.56594	0.78015	2.00723	0.0447248	0.512657
hsa-mir-10b_40203	73.9515	0.783065	0.390869	2.0034	0.0451346	0.515421
hsa-mir-425_389306	838.724	-0.414753	0.207233	-2.00139	0.0453507	0.515421
hsa-mir-486-2_11543	83.5029	0.751338	0.375634	2.00018	0.0454803	0.515421
hsa-mir-320b-1_345253	66.8835	-0.579776	0.290031	-1.99902	0.0456067	0.515421
hsa-mir-505_101149	96.1121	-0.379518	0.18994	-1.99809	0.0457066	0.515421
hsa-mir-30d_82143	978.253	0.33882	0.169698	1.9966	0.0458685	0.515421
hsa-mir-30a_14752	86.9234	0.504478	0.252718	1.99621	0.0459112	0.515421
RP11-312N17.3-003_321823	38.2335	0.776614	0.390121	1.9907	0.0465139	0.517602
RNY4P10-201_272401	19.7091	1.50055	0.754043	1.99001	0.04659	0.517602
hsa-mir-155_295767	99.0338	0.375676	0.188848	1.9893	0.0466678	0.517602
hsa-mir-425_21609	17.591	0.787254	0.395993	1.98805	0.0468061	0.517602
hsa-mir-486-2_327004	6129.4	0.723326	0.363905	1.98768	0.0468472	0.517602
hsa-mir-148a_157203	55.1789	-0.749007	0.37698	-1.98686	0.0469376	0.517602
hsa-mir-486-2_19856	1430.52	0.403	0.203054	1.98469	0.0471785	0.517602
hsa-mir-224_74224	24.9	0.997931	0.503169	1.98329	0.0473346	0.517602
hsa-mir-146b_168735	35.5856	-0.567391	0.286254	-1.98213	0.0474652	0.517602
hsa-mir-181b-2_329254	13.1623	-0.835353	0.422092	-1.97908	0.0478071	0.517602
hsa-mir-21_84532	56.0784	-0.529198	0.267573	-1.97777	0.0479546	0.517602
hsa-mir-320c-1_54530	29.9605	0.650012	0.328668	1.97771	0.0479609	0.517602
hsa-mir-26a-1_95668	15.514	-0.823116	0.416428	-1.97661	0.0480858	0.517602
tRNA-Glu-CTC-1-7_266805	34.5608	1.5832	0.801614	1.97502	0.0482657	0.517602
RNY4-201_92446	58.1149	0.651807	0.330111	1.97451	0.0483241	0.517602
hsa-mir-320a_3961	49.4323	0.606042	0.307353	1.97181	0.0486314	0.517602
ENST00000410794.1_314086	109.587	0.798375	0.405791	1.96745	0.049131	0.517602
hsa-mir-221_297165	30.1483	-0.731088	0.371612	-1.96734	0.0491441	0.517602
hsa-let-7a-1_337648	306.648	-0.345952	0.175849	-1.96733	0.0491456	0.517602
hsa-mir-3615_252353	27.7223	0.787168	0.400176	1.96706	0.0491769	0.517602
RP11-727F15.8-001_247531	48.9325	1.00682	0.512083	1.96613	0.0492838	0.517602
hsa-mir-323a_160948	184.32	-0.654336	0.33281	-1.96609	0.0492877	0.517602
RP11-752G15.5-002_201172	48.0546	-0.695899	0.354739	-1.96172	0.0497949	0.517602
hsa-let-7g_108406	18.2334	-0.479344	0.24439	-1.96139	0.0498333	0.517602
hsa-mir-93_101028	13.1754	-0.873737	0.445595	-1.96083	0.0498985	0.517602
hsa-mir-4433a_297666	50.1521	0.636117	0.32455	1.95999	0.0499965	0.517602
RP11-317N8.1-001_201908	26.9429	1.19449	0.609599	1.95947	0.0500579	0.517602
hsa-mir-486-2_159224	170.584	0.681961	0.348113	1.95902	0.0501106	0.517602
hsa-mir-24-2_357877	3309.91	-0.231051	0.118013	-1.95785	0.0502482	0.517602
CTD-2083E4.1-002_128732	30.2978	0.723814	0.369888	1.95685	0.0503655	0.517602
hsa-mir-339_359493	32.3414	-0.66092	0.338067	-1.95499	0.0505837	0.517602
hsa-mir-27b_132733	80.432	0.592186	0.302967	1.95462	0.0506279	0.517602
hsa-mir-155_15534	269.38	0.495036	0.253311	1.95426	0.0506709	0.517602
hsa-mir-223_171479	85.54	-0.551162	0.282125	-1.95361	0.0507476	0.517602
hsa-mir-181c_8405	13.7899	-1.03496	0.530008	-1.95273	0.0508516	0.517602
hsa-mir-103b-1_349424	36.4827	-0.842556	0.431886	-1.95088	0.0510719	0.518461
RNY4P10-201_313913	28.7043	1.48361	0.762465	1.94581	0.0516776	0.521699
RNY4-201_226020	25.2983	1.46473	0.752764	1.94581	0.0516777	0.521699
hsa-mir-223_367902	397.3	-0.341958	0.175955	-1.94344	0.0519633	0.521699
hsa-mir-106b_31535	404.96	-0.382313	0.196964	-1.94103	0.0522548	0.521699
hsa-mir-181b-2_303647	61.1919	0.55357	0.285213	1.9409	0.0522701	0.521699
hsa-mir-223_265602	78.7758	-0.73195	0.377174	-1.94062	0.0523047	0.521699
hsa-mir-148b_329438	560.869	-0.498909	0.257561	-1.93705	0.0527392	0.521699
hsa_piR_000823|gb|DQ571031|Homo_sapiens_37959	14.8948	0.716117	0.369814	1.93642	0.0528158	0.521699
hsa-mir-487b_82745	55.0545	-0.804722	0.415624	-1.93618	0.0528461	0.521699
hsa-mir-103a-1_385274	61.8238	-0.523852	0.271059	-1.93261	0.0532844	0.521699
hsa-mir-146a_192079	305.417	-0.340553	0.176291	-1.93176	0.0533888	0.521699
hsa-mir-25_278266	13.3002	0.402141	0.208333	1.93029	0.0535715	0.521699
ENST00000387460.2_180918	13.7853	-1.16037	0.601283	-1.92982	0.0536297	0.521699
hsa-mir-103b-1_145429	1317.69	-0.305724	0.158514	-1.92868	0.05377	0.521699
hsa-mir-26a-2_379023	7625.62	-0.378892	0.196619	-1.92703	0.0539757	0.521699
tRNA-Pro-TGG-1-1_321592	43.3435	1.53174	0.795012	1.92669	0.0540179	0.521699
hsa-mir-486-2_89891	32.7835	0.736083	0.382106	1.92638	0.0540566	0.521699
hsa-mir-379_228632	54.068	-0.89695	0.46571	-1.92598	0.0541066	0.521699
hsa-mir-1246_279549	41.9355	1.06495	0.553069	1.92553	0.0541634	0.521699
hsa-let-7i_338759	22.0889	-0.554456	0.288001	-1.92519	0.0542058	0.521699
hsa-mir-1307_40231	40.5788	-0.582876	0.302833	-1.92475	0.054261	0.521699
hsa-mir-150_346055	29.0708	0.955632	0.496796	1.92359	0.0544057	0.521776
hsa-mir-223_213	39.1427	-0.817541	0.426081	-1.91875	0.0550163	0.525371
hsa-let-7d_374627	3129.62	0.296446	0.154858	1.91431	0.0555809	0.525371
hsa-mir-26b_197173	305.054	0.418402	0.218571	1.91426	0.0555864	0.525371
hsa-mir-484_221571	60.1538	-0.401682	0.209889	-1.91378	0.0556481	0.525371
hsa-let-7a-1_257860	170.017	-0.60413	0.315862	-1.91264	0.0557942	0.525371
hsa-mir-454_231703	78.2215	-0.883681	0.462037	-1.91258	0.055802	0.525371
RNY4P27-201_304147	21.6934	1.45347	0.760131	1.91213	0.0558596	0.525371
hsa-mir-92a-1_261493	31.9893	0.812141	0.425453	1.90889	0.0562765	0.525371
hsa-mir-223_212919	5363.26	-0.381426	0.199958	-1.90753	0.0564522	0.525371
hsa-mir-1307_183568	482.103	-0.351391	0.184293	-1.9067	0.0565601	0.525371
RNY4P10-201_121679	14.2083	1.07182	0.562504	1.90544	0.0567232	0.525371
tRNA-Leu-TAG-1-1_361255	18.6028	0.828464	0.435005	1.90449	0.0568462	0.525371
hsa-mir-10b_254995	3475.28	0.656524	0.345008	1.90292	0.0570504	0.525371
hsa-mir-10b_12801	265.784	0.658172	0.34604	1.90201	0.05717	0.525371
RNY1-201_346103	342.661	0.598694	0.315097	1.90003	0.0574289	0.525371
hsa-mir-191_223343	59.5833	-0.471761	0.248404	-1.89917	0.057542	0.525371
hsa-mir-10a_44529	774.411	0.421108	0.221988	1.89698	0.0578299	0.525371
hsa-mir-92a-1_70633	51.4176	0.458366	0.241693	1.89648	0.0578963	0.525371
hsa-mir-425_174220	1682.58	-0.302956	0.159758	-1.89635	0.0579144	0.525371
hsa-mir-340_293144	14.3847	-0.797409	0.421177	-1.89329	0.0583195	0.525371
hsa-mir-24-2_49062	19.2582	1.06837	0.564482	1.89265	0.0584047	0.525371
MT-CO2-201_311323	41.2538	0.93392	0.493589	1.8921	0.0584775	0.525371
ENST00000459091.1_14163	27.5274	0.732018	0.386939	1.89182	0.0585156	0.525371
hsa-mir-320a_158369	13.8952	-0.991731	0.524391	-1.8912	0.058597	0.525371
hsa-mir-330_241722	63.5799	0.537647	0.284321	1.89099	0.0586262	0.525371
hsa-mir-223_109179	35.4539	-0.720051	0.38085	-1.89064	0.0586726	0.525371
hsa-mir-320a_218042	190.315	-0.661156	0.350148	-1.88822	0.0589964	0.525371
hsa-mir-92a-2_262162	15.6532	0.500645	0.265189	1.88788	0.0590422	0.525371
hsa-mir-92a-1_212023	55.5829	0.46809	0.248146	1.88635	0.0592476	0.525371
hsa-mir-194-1_388745	36.507	0.692991	0.367584	1.88526	0.059395	0.525371
hsa-mir-186_102312	42.1762	0.584257	0.310081	1.88421	0.0595367	0.525371
hsa-mir-877_265156	31.0692	0.804607	0.427203	1.88343	0.0596422	0.525371
hsa-mir-190a_128649	34.0264	-0.854232	0.453649	-1.88302	0.0596974	0.525371
hsa-let-7a-1_233712	17.4156	0.735022	0.390526	1.88214	0.0598176	0.525371
hsa-mir-378a_388523	34.6143	-0.662356	0.352012	-1.88163	0.0598864	0.525371
hsa-mir-324_117284	16.107	0.971776	0.516536	1.88133	0.0599269	0.525371
ENST00000390880.2_125502	129.412	-0.601384	0.319763	-1.88072	0.0600103	0.525371
hsa-mir-29c_243024	19.828	0.753849	0.401137	1.87928	0.0602064	0.525371
hsa-mir-1307_295816	89.8075	-0.478097	0.254636	-1.87757	0.0604395	0.525371
hsa-let-7b_279485	47.7228	0.647086	0.34476	1.87692	0.0605294	0.525371
RNY4-201_139615	69.6189	0.984469	0.524633	1.87649	0.0605879	0.525371
hsa-mir-30d_118230	1758.93	-0.266848	0.142221	-1.87629	0.0606148	0.525371
RP11-317N8.1-001_12390	31.319	0.818816	0.436543	1.87568	0.0606991	0.525371
RNY4P7-201_163622	284.572	1.75815	0.940856	1.86867	0.0616684	0.529157
hsa-mir-103b-1_110365	32.2478	-0.553806	0.296379	-1.86858	0.0616818	0.529157
hsa-mir-486-2_386489	51.002	0.704683	0.377542	1.8665	0.0619709	0.529157
RNY4P20-201_357323	44.6827	0.785088	0.420714	1.86608	0.0620296	0.529157
hsa-let-7f-2_27881	2881.33	-0.467439	0.250642	-1.86497	0.062186	0.529157
hsa-mir-486-2_369505	102.311	0.647445	0.347231	1.86459	0.0622385	0.529157
hsa-mir-766_145862	131.679	-0.513537	0.275742	-1.86238	0.0625491	0.529157
hsa-mir-92a-1_206190	920.538	0.348673	0.187392	1.86066	0.0627917	0.529157
ENST00000445125.2_28767	33.5337	1.24611	0.669959	1.85998	0.0628885	0.529157
CTB-61I7.2-001_175888	197.515	-0.622889	0.334945	-1.85968	0.0629313	0.529157
hsa-mir-146b_293150	664.608	-0.307881	0.165587	-1.85933	0.0629808	0.529157
RP11-193H5.6-001_302577	20.6698	1.0791	0.580452	1.85906	0.063018	0.529157
RP11-317N8.1-001_334567	184.764	0.741841	0.399213	1.85826	0.0631323	0.529157
hsa-let-7g_249543	34.5968	0.711742	0.38312	1.85775	0.063204	0.529157
hsa-mir-3615_83212	512.162	0.349236	0.188007	1.85757	0.0632299	0.529157
hsa-mir-92a-1_177768	54.5126	0.675427	0.363779	1.85669	0.0633546	0.529157
hsa-mir-185_211019	26.8348	-0.798901	0.43095	-1.85381	0.0637658	0.531428
RP11-645N11.2-002_141411	26.6327	-0.662528	0.358046	-1.8504	0.0642563	0.534268
hsa-mir-143_320961	2324.27	-0.605689	0.327534	-1.84924	0.0644231	0.534268
hsa-mir-486-2_260369	73.658	0.630318	0.340984	1.84852	0.0645265	0.534268
hsa-mir-103b-1_337709	447.414	-0.324135	0.175739	-1.84441	0.0651237	0.536389
hsa-mir-103b-1_195904	27.6147	0.860233	0.466451	1.84421	0.065153	0.536389
RNY4P10-201_156655	39.8991	1.48561	0.805706	1.84386	0.0652042	0.536389
hsa-mir-486-2_242498	96.3977	0.625318	0.339514	1.8418	0.0655041	0.536989
hsa-let-7b_80587	18.0231	0.375353	0.204219	1.838	0.0660631	0.536989
ENST00000387347.2_148458	13.7552	-1.03445	0.562858	-1.83786	0.0660836	0.536989
hsa-mir-185_180760	18.868	-0.822337	0.447446	-1.83785	0.0660851	0.536989
hsa-mir-139_97503	43.4468	0.677053	0.36863	1.83667	0.0662581	0.536989
hsa-mir-30e_113734	15.61	-0.967895	0.527496	-1.83489	0.0665225	0.536989
hsa-let-7d_158304	43.2223	-0.961834	0.525001	-1.83206	0.0669421	0.536989
hsa-mir-532_215886	152.125	0.534044	0.29165	1.83111	0.0670835	0.536989
hsa-mir-19b-2_262780	12.6178	-1.08493	0.592647	-1.83065	0.0671521	0.536989
RNY3P2-201_257881	32.8374	-1.11683	0.610194	-1.83029	0.067206	0.536989
hsa-mir-320a_109808	282.98	-0.473013	0.25852	-1.82969	0.0672958	0.536989
hsa-mir-1307_263961	52.8054	-0.556443	0.30413	-1.82963	0.067306	0.536989
hsa-mir-127_7702	89.4452	-0.735346	0.402159	-1.8285	0.0674749	0.536989
hsa-mir-223_292828	134.879	-0.497278	0.272219	-1.82675	0.0677367	0.536989
hsa-let-7b_77688	532.23	-0.445663	0.243978	-1.82665	0.067752	0.536989
hsa-mir-10399_322705	10.1713	0.90038	0.492959	1.82648	0.0677778	0.536989
hsa-let-7b_12323	41.9929	0.791753	0.433539	1.82626	0.0678117	0.536989
hsa-mir-223_244059	440.069	-0.401887	0.220123	-1.82573	0.0678904	0.536989
hsa-mir-24-2_286810	38.905	-0.542553	0.297417	-1.82421	0.0681196	0.536989
hsa-mir-92b_322636	39.3868	0.608985	0.333932	1.82368	0.0682008	0.536989
hsa-mir-3184_70694	52.4444	-0.535523	0.293759	-1.823	0.0683033	0.536989
hsa-mir-340_238362	150.367	-0.532154	0.292414	-1.81986	0.0687799	0.536989
hsa-mir-25_148318	580.463	-0.237116	0.130308	-1.81966	0.0688107	0.536989
hsa-mir-140_63300	46.689	0.548047	0.301509	1.81768	0.0691129	0.536989
hsa-mir-140_22504	771.429	0.295898	0.162813	1.81741	0.0691537	0.536989
ENST00000631292.1_378204	44.2984	-1.10751	0.609571	-1.81687	0.0692366	0.536989
hsa-mir-126_45281	609.616	0.4231	0.233322	1.81337	0.0697746	0.536989
RNY4P10-201_289746	21.719	1.37271	0.757158	1.81298	0.0698352	0.536989
hsa-mir-361_201594	19.7154	0.935984	0.516405	1.8125	0.0699092	0.536989
hsa-mir-320a_125173	52.2571	0.594781	0.328387	1.81122	0.0701064	0.536989
hsa-let-7b_317272	676.07	0.465257	0.256969	1.81056	0.0702093	0.536989
hsa-let-7g_346937	22.0512	-0.612948	0.338618	-1.81014	0.0702734	0.536989
ENST00000445125.2_375312	27.194	1.01264	0.559582	1.80964	0.0703512	0.536989
hsa-let-7d_256447	42.6911	-0.693251	0.383224	-1.809	0.0704515	0.536989
hsa-mir-126_280532	18.9192	0.401246	0.221845	1.80868	0.0705009	0.536989
hsa-mir-139_239740	39.9602	0.62267	0.344405	1.80796	0.070613	0.536989
hsa-mir-92a-1_221468	204.066	0.609579	0.337178	1.80788	0.0706247	0.536989
hsa-mir-3184_128635	23.9611	1.00762	0.557513	1.80735	0.0707072	0.536989
hsa-mir-486-2_238440	14.1996	0.50829	0.281291	1.80699	0.0707638	0.536989
hsa-mir-26a-2_70181	168.114	-0.488072	0.270286	-1.80576	0.0709553	0.537374
hsa-mir-143_190018	230.622	-0.62281	0.345214	-1.80413	0.071211	0.538032
hsa-mir-126_139186	18.0888	0.806444	0.447245	1.80314	0.0713665	0.538032
hsa-mir-193a_212493	19.8669	1.09244	0.606066	1.80251	0.0714651	0.538032
ENST00000469309.1_235654	25.5834	1.19052	0.661301	1.80027	0.0718176	0.539622
hsa-mir-340_227325	12.9793	-1.07437	0.597583	-1.79786	0.0721998	0.540328
hsa-mir-196b_244690	59.5647	-0.620116	0.345319	-1.79578	0.07253	0.540328
hsa-let-7c_226979	139.716	-0.436685	0.243276	-1.79502	0.0726507	0.540328
hsa-mir-25_164373	24061.6	0.184954	0.103144	1.79317	0.0729464	0.540328
hsa-let-7b_319125	168.959	0.436766	0.243616	1.79284	0.0729979	0.540328
RP11-177A2.2-001_312718	11.0988	-0.930648	0.519385	-1.79183	0.0731605	0.540328
hsa-mir-24-2_307050	37.052	-0.476317	0.265853	-1.79165	0.0731884	0.540328
RNY4P10-201_177569	2102.61	1.45511	0.813253	1.78924	0.0735758	0.540328
RP11-846F4.3-001_370470	37.903	-0.668775	0.37419	-1.78726	0.073895	0.540328
hsa-mir-191_137776	51.8129	-0.464572	0.260191	-1.78551	0.0741792	0.540328
hsa-mir-221_226133	45.7626	-0.642677	0.360126	-1.78459	0.074328	0.540328
hsa-mir-222_230701	23.1103	0.820442	0.459795	1.78436	0.0743647	0.540328
tRNA-Ala-TGC-3-2_135972	43.4686	-0.644693	0.361488	-1.78344	0.0745142	0.540328
RNY4P7-201_268722	35.2017	1.49796	0.839999	1.78329	0.0745396	0.540328
hsa-mir-6852_280926	62.3667	-0.560081	0.314122	-1.783	0.0745861	0.540328
hsa-mir-342_28467	407.342	0.388762	0.218039	1.78299	0.0745877	0.540328
hsa-mir-199a-1_246823	495.519	-0.348443	0.195439	-1.78287	0.0746073	0.540328
hsa-mir-106b_205021	324.265	-0.285166	0.160115	-1.78101	0.0749112	0.540328
hsa-let-7a-3_141075	61.9424	-0.425407	0.238874	-1.78089	0.0749309	0.540328
hsa-mir-486-2_23660	43.4394	0.541927	0.304544	1.77947	0.0751627	0.540328
hsa-mir-93_87314	6338.28	-0.28665	0.161163	-1.77864	0.0752994	0.540328
hsa-mir-140_334324	27.8383	0.621992	0.349972	1.77726	0.075525	0.540328
hsa-mir-10b_300404	120.01	0.646581	0.363864	1.77698	0.0755709	0.540328
hsa-mir-15b_150915	1905.69	-0.280243	0.157729	-1.77674	0.0756112	0.540328
hsa-let-7i_239318	16.3204	0.960241	0.540942	1.77513	0.0758767	0.540328
hsa-mir-223_197400	30.3536	-0.316263	0.178192	-1.77485	0.0759234	0.540328
hsa-mir-451b_173960	21.1424	0.72294	0.407413	1.77446	0.0759863	0.540328
hsa-mir-1246_231014	41.2068	0.865536	0.487785	1.77442	0.0759937	0.540328
RNY4P7-201_125438	49.5515	1.56429	0.882522	1.77253	0.0763072	0.540328
hsa_piR_016658|gb|DQ592931|Homo_sapiens_267799	146.755	-0.68065	0.384037	-1.77235	0.076336	0.540328
hsa-mir-223_151594	442.949	-0.249756	0.140936	-1.77213	0.0763734	0.540328
hsa-mir-28_3921	59.9846	-0.406589	0.229488	-1.77172	0.0764415	0.540328
hsa-mir-486-2_302945	15.0964	0.867001	0.489851	1.76993	0.076739	0.540675
hsa-mir-409_50698	26.3471	-0.914383	0.516786	-1.76937	0.0768328	0.540675
hsa-mir-12136_217774	44.9823	1.36788	0.77363	1.76814	0.0770381	0.540675
hsa-mir-486-2_210674	17.9611	0.704896	0.39876	1.76772	0.0771078	0.540675
hsa-mir-328_94436	49.7472	0.473656	0.26803	1.76718	0.0771988	0.540675
CTD-2083E4.1-002_54147	54.6031	0.632744	0.358342	1.76575	0.0774374	0.540834
hsa_piR_016658|gb|DQ592931|Homo_sapiens_131133	12.4817	-1.00472	0.569134	-1.76535	0.0775049	0.540834
hsa-let-7b_44366	139.63	0.420584	0.238402	1.76418	0.0777017	0.541218
hsa-mir-320a_263607	17.6496	-0.881623	0.500031	-1.76314	0.0778774	0.541454
hsa-let-7i_325262	21.6221	-0.831995	0.47226	-1.76173	0.0781149	0.542118
ENST00000387460.2_189994	43.8688	-0.966998	0.549377	-1.76017	0.0783788	0.542338
ENST00000445125.2_247065	39.5477	1.08527	0.61754	1.75741	0.0788474	0.542338
ENST00000445125.2_148529	64.0214	1.14964	0.654781	1.75577	0.0791285	0.542338
RNY4P10-201_353533	1187.44	0.501615	0.285746	1.75546	0.0791808	0.542338
hsa-mir-92a-1_46180	99.2357	0.567432	0.323535	1.75385	0.0794563	0.542338
RNY4P10-201_153683	973.188	0.501029	0.285863	1.75269	0.0796556	0.542338
hsa-mir-186_44390	16.5943	0.857285	0.489402	1.7517	0.0798259	0.542338
hsa-let-7a-1_301188	174.091	0.441339	0.252065	1.75089	0.0799646	0.542338
RNY4-201_318931	18.251	-0.831709	0.475055	-1.75077	0.0799863	0.542338
AC139452.3-001_116891	19.4535	1.14891	0.656592	1.7498	0.0801527	0.542338
hsa-let-7a-1_33941	5865.21	-0.40852	0.23349	-1.74963	0.0801828	0.542338
hsa-mir-126_159506	913.733	-0.294067	0.168233	-1.74798	0.0804682	0.542338
ENST00000464816.1_121348	22.343	0.922626	0.527836	1.74794	0.0804746	0.542338
hsa-mir-191_74716	20.8021	1.05997	0.606519	1.74763	0.0805282	0.542338
RP1-179N16.4-001_379289	31.154	1.16264	0.665288	1.74758	0.0805373	0.542338
hsa-let-7b_231475	30.1598	0.580044	0.331915	1.74757	0.0805392	0.542338
hsa-mir-505_85443	24.8277	-0.67714	0.387604	-1.74699	0.0806388	0.542338
hsa-mir-21_244101	2680.16	-0.400335	0.229302	-1.74588	0.0808315	0.542338
hsa-mir-486-2_286917	264.263	0.561467	0.321611	1.7458	0.0808464	0.542338
hsa-mir-16-2_293401	46.689	0.367344	0.210679	1.74362	0.0812249	0.542854
hsa-mir-29a_6172	104.544	-0.496051	0.284543	-1.74332	0.0812775	0.542854
hsa-mir-134_379530	98.5301	-0.822955	0.472273	-1.74254	0.0814141	0.542854
hsa-mir-451b_95918	17.3083	0.678455	0.389448	1.74209	0.0814922	0.542854
hsa-mir-103b-1_272020	270.506	0.637688	0.366285	1.74096	0.0816904	0.543227
RNY4-201_387375	12.7713	-0.886421	0.51039	-1.73675	0.082431	0.546749
hsa-mir-3615_311421	82.6259	0.573866	0.330625	1.7357	0.0826162	0.546749
hsa-mir-29b-2_53190	14.9111	-0.733243	0.422493	-1.73551	0.0826497	0.546749
hsa-mir-671_204187	38.3578	-0.473431	0.272979	-1.73431	0.0828625	0.547208
hsa-mir-1307_340977	208.895	-0.381052	0.220344	-1.72935	0.0837468	0.551452
AC008555.4-002_295065	41.3227	0.972724	0.562566	1.72908	0.0837941	0.551452
RNY4P10-201_180660	77.0423	1.41109	0.817526	1.72605	0.0843389	0.553371
hsa-mir-25_332432	106.857	0.565064	0.327413	1.72584	0.0843757	0.553371
hsa-mir-301a_11813	50.1796	-0.658478	0.382478	-1.72161	0.0851403	0.557428
hsa-mir-24-2_246555	36.6576	-0.497203	0.289444	-1.71778	0.0858364	0.561023
RNY4P10-201_157181	18.6534	1.25228	0.72956	1.71649	0.0860725	0.561604
hsa-let-7g_252247	163.182	-0.421088	0.245441	-1.71564	0.0862276	0.561656
hsa-mir-21_216457	2595.08	-0.503548	0.293993	-1.71279	0.0867513	0.564105
ENST00000387421.1_285086	18.2687	-0.845924	0.494968	-1.70905	0.0874423	0.567631
ENST00000567819.1_79652	45.4179	0.242209	0.141797	1.70814	0.0876105	0.567758
RNY4-201_25199	228.441	0.509166	0.298437	1.70611	0.0879885	0.568429
hsa-mir-30d_130736	15.9	0.702827	0.411978	1.70598	0.088012	0.568429
hsa-mir-182_63019	133.283	0.651231	0.381991	1.70483	0.0882255	0.568846
RNY4P14-201_285430	67.0052	0.632777	0.371351	1.70399	0.0883837	0.568905
hsa-mir-320a_59398	40.8903	0.427442	0.251244	1.7013	0.088886	0.570085
hsa-mir-181b-2_14972	27.2248	0.637173	0.374525	1.70128	0.0888898	0.570085
hsa-mir-320a_186451	75.099	-0.711687	0.418594	-1.70018	0.0890964	0.570085
hsa-let-7g_147918	49.4086	-0.71972	0.423409	-1.69982	0.0891644	0.570085
hsa-let-7a-1_88684	3584.99	0.303518	0.178648	1.69897	0.0893248	0.570155
ENST00000387400.1_231612	31.3318	0.893489	0.526474	1.69712	0.0896738	0.571428
hsa-mir-92a-1_211180	142.849	0.588132	0.348044	1.68982	0.0910625	0.57776
hsa-mir-338_144064	30.9305	-0.733789	0.434539	-1.68866	0.0912844	0.57776
hsa-mir-181a-2_376829	5002.9	-0.212579	0.126052	-1.68645	0.09171	0.57776
hsa-let-7f-2_2448	17.5399	-0.678788	0.402607	-1.68598	0.0917995	0.57776
RNY4P10-201_130916	145.015	1.69919	1.00788	1.68591	0.0918131	0.57776
hsa-let-7a-1_245625	149.402	0.454118	0.269408	1.68561	0.09187	0.57776
hsa-mir-301a_331943	9.65898	-1.00645	0.597153	-1.68541	0.0919098	0.57776
hsa-mir-181b-2_63530	41.7254	0.540381	0.320701	1.685	0.0919887	0.57776
ENST00000387449.1_245131	17.7691	-0.900721	0.53462	-1.68479	0.0920299	0.57776
hsa-let-7c_115512	40.8804	0.511495	0.303935	1.68291	0.0923925	0.57787
hsa-mir-25_222963	21.7078	0.575473	0.342107	1.68214	0.0925408	0.57787
hsa-mir-221_386067	21.8116	-0.85619	0.509133	-1.68166	0.0926342	0.57787
hsa-mir-143_72095	41.4014	-0.767787	0.45659	-1.68157	0.0926529	0.57787
hsa-mir-130b_164059	365.317	-0.284885	0.169768	-1.67809	0.0933302	0.579094
hsa-mir-451b_18787	5569.49	0.679939	0.405337	1.67746	0.0934517	0.579094
hsa-let-7b_214705	17.1434	-0.689997	0.41176	-1.67573	0.0937917	0.579094
hsa-mir-144_62017	27.6199	0.823172	0.491657	1.67428	0.0940753	0.579094
hsa-mir-451b_117475	29.4833	0.88189	0.526785	1.6741	0.0941112	0.579094
hsa-mir-3173_257585	18.0328	0.791501	0.472807	1.67405	0.0941217	0.579094
hsa-let-7a-1_41176	28.4448	-0.981697	0.586496	-1.67383	0.0941633	0.579094
hsa-mir-3184_298331	44.5135	0.678196	0.405283	1.67339	0.0942511	0.579094
ENST00000449439.1_152365	26.0841	1.10429	0.660134	1.67283	0.0943617	0.579094
hsa-mir-30c-2_301270	58.6862	0.54171	0.324208	1.67087	0.0947466	0.579094
hsa-mir-1296_56308	44.2993	-0.604207	0.361615	-1.67086	0.0947497	0.579094
RNY4P7-201_317079	23.3945	1.30176	0.779223	1.67058	0.0948046	0.579094
RP11-227B21.1-001_29997	74.1305	1.40933	0.8439	1.67002	0.0949144	0.579094
hsa-mir-30c-2_112039	15.7914	-0.734337	0.439794	-1.66973	0.0949732	0.579094
hsa_piR_016677|gb|DQ592953|Homo_sapiens_326780	17.4646	-0.8272	0.495821	-1.66835	0.0952471	0.579838
hsa-mir-361_132694	340.623	-0.237924	0.142778	-1.66639	0.0956351	0.581238
hsa-mir-744_80783	19.9388	-0.612725	0.367858	-1.66566	0.0957817	0.581238
hsa-mir-26a-2_207010	20.8212	-0.742989	0.446642	-1.6635	0.0962129	0.582909
hsa-mir-486-2_20750	1184.07	0.453088	0.272493	1.66275	0.0963626	0.582909
hsa-mir-4433a_295984	161.513	0.39946	0.24045	1.6613	0.0966532	0.583089
tRNA-Glu-CTC-1-1_388873	46.4459	1.3468	0.810796	1.66108	0.0966977	0.583089
RNY4P7-201_144760	36.603	1.40424	0.846713	1.65846	0.097225	0.584709
hsa-let-7f-1_231804	82.0576	-0.563999	0.340303	-1.65734	0.0974499	0.584709
RP11-846F4.3-001_113226	27.3726	0.679287	0.409911	1.65715	0.0974882	0.584709
hsa-mir-223_72592	19.7056	-0.653968	0.39474	-1.6567	0.0975791	0.584709
hsa-mir-98_266892	734.369	-0.332796	0.201031	-1.65545	0.0978338	0.585316
hsa-mir-1249_107525	55.8847	0.503978	0.304684	1.6541	0.0981072	0.585649
hsa-mir-143_203455	20.408	-0.775391	0.468966	-1.65341	0.0982479	0.585649
ENST00000459091.1_233604	21.7806	-0.88699	0.536648	-1.65284	0.0983643	0.585649
hsa-mir-486-2_128704	21.2562	0.70825	0.428932	1.65119	0.0986993	0.585649
hsa-mir-146a_25522	4434.07	-0.326359	0.197663	-1.65108	0.0987216	0.585649
RNY4-201_333477	29.7059	0.880406	0.533369	1.65065	0.09881	0.585649
hsa-mir-27b_33523	26.2676	-0.727543	0.441203	-1.649	0.0991476	0.586739
RNY4P10-201_314845	1662.22	1.71708	1.04191	1.64801	0.0993502	0.587013
hsa-mir-92a-1_103397	18.3494	0.483537	0.293537	1.64727	0.0995016	0.587013
hsa-mir-769_65236	10.2101	-0.676039	0.411021	-1.64478	0.100015	0.589133
hsa-mir-223_150885	24.4842	-0.458037	0.278881	-1.64241	0.100505	0.591104
hsa-let-7b_71612	69.2006	0.439501	0.267926	1.64039	0.100925	0.591745
hsa-mir-155_31202	19.4301	0.699891	0.427182	1.63839	0.10134	0.591745
hsa-let-7b_145218	13.5822	-0.820925	0.501337	-1.63747	0.101532	0.591745
hsa-mir-484_195889	57.7111	0.58192	0.355502	1.63689	0.101653	0.591745
hsa-mir-320a_113874	2886.05	0.444282	0.271571	1.63597	0.101845	0.591745
ENST00000387342.1_241888	390.179	0.53945	0.329787	1.63576	0.101891	0.591745
hsa-mir-26a-2_343473	17.0474	-0.687697	0.420543	-1.63526	0.101995	0.591745
hsa-mir-378a_187591	138.962	-0.472806	0.289184	-1.63497	0.102056	0.591745
hsa-mir-629_374173	69.7479	0.451629	0.27624	1.63492	0.102066	0.591745
hsa-let-7b_316390	105.029	0.296136	0.181286	1.63353	0.102358	0.591745
hsa-mir-484_82267	148.299	0.460309	0.28185	1.63317	0.102433	0.591745
hsa-let-7b_257038	17.8601	0.77742	0.47619	1.63258	0.102557	0.591745
hsa-let-7c_138439	224.857	0.313312	0.192084	1.63112	0.102864	0.591745
hsa-mir-942_151088	106.483	0.347056	0.212903	1.63011	0.103077	0.591745
hsa-let-7a-1_78189	195.788	-0.282638	0.173675	-1.6274	0.103653	0.591745
hsa-mir-125a_103710	1273.43	-0.308931	0.189884	-1.62695	0.103748	0.591745
hsa-mir-22_369735	82.53	-0.424072	0.260682	-1.62678	0.103784	0.591745
hsa-mir-140_319420	16.1406	0.474451	0.291738	1.62629	0.103887	0.591745
AC004098.3-005_4065	30.6957	1.02709	0.631561	1.62628	0.103891	0.591745
RP3-481F12.6-001_361192	11.8643	-0.565891	0.348124	-1.62554	0.104047	0.591745
hsa-mir-493_383039	103.38	-0.686741	0.422517	-1.62536	0.104086	0.591745
hsa-mir-339_648	19.9891	0.581451	0.357813	1.62501	0.104159	0.591745
RNY4P10-201_382259	431.535	0.574036	0.353376	1.62443	0.104283	0.591745
hsa-mir-92b_52761	39.7252	0.597409	0.368055	1.62315	0.104557	0.591745
hsa-mir-151a_92445	16.1408	-0.648929	0.399879	-1.62281	0.104629	0.591745
ENST00000387377.1_385813	28.3822	-1.26527	0.779709	-1.62274	0.104644	0.591745
hsa-mir-21_95115	47.3479	-0.447857	0.276111	-1.62201	0.1048	0.591749
RNY4P14-201_147016	20.5539	-0.719725	0.443933	-1.62125	0.104965	0.591802
ENST00000387461.2_278385	17.582	-0.76962	0.475056	-1.62006	0.105219	0.592361
hsa_piR_020009|gb|DQ597484|Homo_sapiens_83146	182.799	-0.479187	0.295951	-1.61915	0.105416	0.592386
hsa-mir-30d_44397	37.95	-0.461528	0.285141	-1.6186	0.105534	0.592386
hsa-mir-92a-1_157430	1901.27	0.447248	0.27645	1.61783	0.1057	0.592445
hsa-mir-122b_179495	83.1266	0.756091	0.467654	1.61677	0.105927	0.59285
hsa-mir-223_190385	39.4151	-0.376398	0.232954	-1.61576	0.106146	0.593207
hsa-mir-10a_360093	62.583	0.576335	0.357119	1.61384	0.106561	0.594656
RP11-317N8.1-001_124333	30.4133	0.934357	0.579699	1.6118	0.107006	0.596268
hsa-mir-30a_150320	55.5407	0.600678	0.372967	1.61054	0.10728	0.596921
hsa-mir-221_290629	97.6015	-0.454226	0.282326	-1.60887	0.107644	0.597261
hsa-mir-421_380249	64.3531	-0.356845	0.222006	-1.60736	0.107974	0.597261
hsa-mir-3184_355412	136.835	0.378432	0.235475	1.6071	0.108032	0.597261
hsa-mir-486-2_122626	451.768	0.341345	0.212461	1.60663	0.108136	0.597261
LA16c-390E6.1-002_325716	37.1482	1.19189	0.742235	1.60581	0.108315	0.597261
hsa-mir-155_311817	579.551	0.270532	0.168516	1.60538	0.10841	0.597261
hsa-mir-26a-2_370766	95.7613	-0.369383	0.230108	-1.60526	0.108436	0.597261
hsa-mir-223_57633	97.5706	-0.351057	0.219052	-1.60262	0.109019	0.599108
hsa-mir-30d_66019	152.379	1.2132	0.757155	1.60232	0.109086	0.599108
tRNA-Ser-GCT-6-1_288120	67.5263	0.339377	0.21194	1.60129	0.109313	0.599496
hsa-mir-1301_137162	13.129	1.09205	0.682778	1.59942	0.109727	0.6009
ENST00000500358.6_119580	90.5993	1.14035	0.713636	1.59795	0.110054	0.60183
hsa-mir-21_50519	25.7657	-0.732437	0.458974	-1.59581	0.110531	0.60357
ENST00000387421.1_293951	76.8382	-0.677493	0.424762	-1.595	0.110713	0.603702
hsa-mir-26a-1_279273	14.0021	-0.863958	0.542217	-1.59338	0.111075	0.603848
hsa-mir-29b-2_148189	51.4344	-0.550284	0.345484	-1.59279	0.111207	0.603848
hsa-let-7a-1_204893	26.4688	0.526074	0.330291	1.59276	0.111214	0.603848
hsa-mir-493_200222	36.5596	-0.70087	0.44043	-1.59133	0.111535	0.603951
hsa-mir-223_382565	41.1796	-0.29986	0.188491	-1.59085	0.111644	0.603951
hsa-mir-103b-1_309187	96.5409	0.628584	0.395246	1.59036	0.111754	0.603951
hsa_piR_000823|gb|DQ571031|Homo_sapiens_235697	34.1468	0.658058	0.414108	1.5891	0.112038	0.603951
hsa-let-7b_291732	21.7956	0.358449	0.225656	1.58848	0.112179	0.603951
hsa_piR_016658|gb|DQ592931|Homo_sapiens_188757	28.3493	-1.30816	0.823538	-1.58846	0.112183	0.603951
hsa-mir-195_3764	24.8821	0.769395	0.484723	1.58729	0.112448	0.604526
RNY4P10-201_149024	97.5078	0.620306	0.392567	1.58013	0.114078	0.609531
hsa-mir-199a-1_335914	76.4511	-0.38155	0.241477	-1.58007	0.114091	0.609531
hsa-mir-505_122469	32.7603	-0.61672	0.390424	-1.57961	0.114195	0.609531
hsa-mir-21_63219	26.43	-0.728365	0.461179	-1.57935	0.114255	0.609531
tRNA-Gly-TCC-1-1_189681	23.7562	0.581788	0.368413	1.57918	0.114296	0.609531
hsa-mir-186_39204	175.78	0.398351	0.252281	1.579	0.114337	0.609531
hsa-let-7f-2_154426	95.4903	-0.373318	0.236633	-1.57762	0.114652	0.61036
hsa-mir-99b_21983	270.372	0.416932	0.264419	1.57679	0.114844	0.610528
hsa-mir-4446_331416	34.833	-0.715146	0.454089	-1.5749	0.115279	0.61177
hsa-mir-181a-1_284959	15.9042	-0.911949	0.579494	-1.5737	0.115557	0.61177
SMC1A-202_253221	218.12	1.07931	0.685847	1.57369	0.115558	0.61177
hsa-mir-379_62170	641.123	-0.624207	0.39684	-1.57294	0.115732	0.611839
hsa-mir-27b_348948	20.2064	-0.736567	0.468731	-1.57141	0.116088	0.612874
hsa-mir-93_260900	209.736	-0.39669	0.252583	-1.57054	0.116291	0.613096
RNY4P10-201_65064	69.8832	1.27327	0.81132	1.56938	0.116559	0.613664
hsa-mir-151a_220985	13.7077	-0.879811	0.561197	-1.56774	0.116942	0.614479
hsa-mir-409_70991	72.872	-0.679604	0.433604	-1.56734	0.117036	0.614479
hsa-mir-122b_164476	210.592	0.721354	0.460524	1.56638	0.11726	0.614811
RNY4P16-201_367529	40.6855	-0.667723	0.426481	-1.56566	0.117429	0.614849
hsa-mir-27b_262655	20.58	0.812903	0.519459	1.5649	0.117606	0.614934
hsa-mir-574_328088	41.56	-0.502867	0.3215	-1.56413	0.117787	0.615039
hsa-mir-92a-1_259425	3713.45	0.537351	0.343838	1.5628	0.118099	0.615824
RNY4P23-201_16980	22.2808	-0.607015	0.388612	-1.56201	0.118287	0.615961
hsa-mir-30e_265891	21.5329	-0.72508	0.464466	-1.56111	0.118499	0.61599
hsa-mir-199a-1_293445	5230.19	-0.256941	0.164641	-1.56061	0.118615	0.61599
hsa-mir-16-2_361359	138.43	0.342382	0.219528	1.55963	0.118848	0.61625
RP11-382F24.7-001_317930	23.7457	0.733112	0.470309	1.55879	0.119047	0.61625
hsa-mir-30a_355731	51.2903	-0.501717	0.321953	-1.55835	0.119149	0.61625
hsa-mir-186_136219	61.608	-0.508265	0.32662	-1.55614	0.119676	0.61812
RNY4P27-201_362669	16.8037	1.12609	0.723958	1.55547	0.119835	0.61812
tRNA-Gln-CTG-4-2_117108	28.9837	-0.660321	0.425149	-1.55315	0.120387	0.620104
hsa-mir-29a_340338	347.547	0.380869	0.245602	1.55076	0.12096	0.620104
hsa-mir-30e_369968	138.476	0.370959	0.239262	1.55043	0.121038	0.620104
hsa-mir-486-2_323804	23.1068	0.605051	0.390397	1.54984	0.121181	0.620104
hsa-mir-26b_227170	3328.03	-0.351284	0.226806	-1.54883	0.121422	0.620104
hsa-mir-10b_103516	1166.92	0.538282	0.347622	1.54847	0.12151	0.620104
hsa-mir-26a-2_201231	72.9656	-0.494288	0.319257	-1.54824	0.121563	0.620104
hsa-mir-340_355700	23.0085	-0.819153	0.529225	-1.54783	0.121662	0.620104
hsa-mir-200c_82018	126.482	-0.4213	0.272257	-1.54743	0.121759	0.620104
hsa-mir-222_189672	91.245	-0.475811	0.307672	-1.54649	0.121987	0.620104
tRNA-Glu-TTC-2-2_151603	82.673	-0.458604	0.296692	-1.54572	0.122171	0.620104
hsa-mir-151a_61495	70.4521	-0.353738	0.228935	-1.54514	0.122311	0.620104
RP11-317N8.1-001_259845	26.6232	0.697475	0.451533	1.54468	0.122423	0.620104
hsa-let-7f-2_16319	41.9191	-0.516713	0.334574	-1.54439	0.122494	0.620104
ENST00000445125.2_314540	42.2109	1.156	0.748911	1.54357	0.122692	0.620288
hsa-let-7g_238327	68.4374	-0.641764	0.416359	-1.54137	0.123227	0.622163
hsa-mir-320a_364398	114.581	0.418076	0.271419	1.54033	0.123479	0.622387
RP3-481F12.6-001_388160	30.7294	0.56222	0.365114	1.53985	0.123597	0.622387
RP11-727F15.8-001_184826	16.9989	0.826335	0.537015	1.53876	0.123864	0.622682
hsa-mir-101-1_340065	23.833	0.754747	0.490653	1.53825	0.123987	0.622682
RP11-752G15.5-002_164610	19.0855	0.519266	0.338109	1.53579	0.124589	0.622682
hsa-mir-10b_381432	1448.08	0.525597	0.34225	1.53571	0.124609	0.622682
hsa-mir-486-2_254515	15.073	0.595441	0.387869	1.53516	0.124744	0.622682
hsa-mir-2355_282122	55.8844	-0.587905	0.383252	-1.53399	0.125032	0.622682
RP11-694I15.3-003_228850	53.485	1.03239	0.673155	1.53366	0.125112	0.622682
hsa-mir-92b_38655	20.3225	0.679871	0.443971	1.53134	0.125685	0.622682
hsa-mir-1307_320902	12.3832	-0.7699	0.503188	-1.53004	0.126006	0.622682
RNY4P7-201_36392	37.3147	-0.746563	0.487952	-1.52999	0.126019	0.622682
hsa-let-7f-2_140514	312.329	-0.371176	0.242617	-1.52988	0.126046	0.622682
hsa-mir-3184_131420	220.705	0.418547	0.273582	1.52988	0.126047	0.622682
hsa-mir-451b_82148	22.4903	0.801158	0.524225	1.52827	0.126446	0.622682
hsa-mir-4433a_7331	93.9808	0.750717	0.491265	1.52813	0.12648	0.622682
hsa-mir-150_267228	65.8544	0.633777	0.415086	1.52686	0.126797	0.622682
hsa-mir-223_34804	29.2275	-0.702603	0.460398	-1.52608	0.12699	0.622682
hsa-let-7b_106740	19.522	-0.686573	0.449915	-1.52601	0.127008	0.622682
ENST00000550403.5_129626	23.3351	0.98371	0.645191	1.52468	0.127339	0.622682
hsa-mir-21_34569	25.398	-0.420049	0.275572	-1.52428	0.127439	0.622682
RNY4-201_36466	314.822	0.438295	0.2876	1.52397	0.127515	0.622682
RP11-694I15.3-003_330674	38.1485	1.28168	0.841305	1.52345	0.127647	0.622682
RNY4P27-201_331569	27.5067	1.1893	0.781285	1.52224	0.127949	0.622682
RP11-193H5.6-001_351401	26.7369	0.726292	0.477121	1.52224	0.127949	0.622682
RNY4P6-201_381130	22.8175	-0.735901	0.483444	-1.52221	0.127957	0.622682
hsa-let-7a-1_387424	39.2188	-0.439102	0.288553	-1.52174	0.128075	0.622682
ENST00000445125.2_355929	25.3896	0.947873	0.623093	1.52124	0.1282	0.622682
RNY4-201_238927	20.308	-1.16118	0.76421	-1.51946	0.128648	0.622682
hsa-mir-598_196704	118.565	-0.392192	0.258185	-1.51904	0.128753	0.622682
hsa-mir-10b_113391	57.2979	0.578519	0.381054	1.51821	0.128962	0.622682
RP11-752G15.5-002_26765	18.808	-0.686096	0.451952	-1.51807	0.128996	0.622682
RP11-317N8.1-001_286209	86.9096	0.614261	0.40464	1.51804	0.129004	0.622682
hsa-mir-26b_190519	497.009	0.341963	0.225318	1.51769	0.129093	0.622682
hsa-let-7f-2_385909	15.8512	-0.544894	0.359065	-1.51753	0.129132	0.622682
hsa-mir-223_31837	27.1948	-0.540553	0.356939	-1.51441	0.129921	0.622682
hsa-mir-1307_375997	41.8136	-0.669602	0.442832	-1.51209	0.13051	0.622682
RNY4-201_333488	18.098	-0.678331	0.448681	-1.51183	0.130576	0.622682
RNY4P10-201_116166	330.581	0.519039	0.343373	1.51159	0.130638	0.622682
RNY4P18-201_205577	20.1221	-0.670277	0.443452	-1.5115	0.130662	0.622682
hsa-mir-139_108018	173.551	0.342324	0.226598	1.51071	0.130863	0.622682
hsa-mir-320a_69368	26.3515	0.854332	0.566005	1.50941	0.131195	0.622682
hsa-mir-126_90944	103.965	-0.392732	0.260386	-1.50827	0.131486	0.622682
hsa-mir-199a-1_4234	293.89	-0.325848	0.216118	-1.50773	0.131624	0.622682
hsa-mir-486-2_32560	171.832	0.478667	0.317834	1.50603	0.13206	0.622682
ENST00000467525.5_81295	190.827	-0.51973	0.345173	-1.50571	0.132142	0.622682
hsa-let-7c_25130	54.2378	0.504607	0.335216	1.50532	0.132242	0.622682
hsa-let-7b_208495	23890.2	0.235837	0.156686	1.50515	0.132285	0.622682
hsa-mir-10b_141624	55.8693	0.652303	0.433767	1.50381	0.13263	0.622682
RP11-317N8.1-001_121095	59.7039	0.754592	0.50179	1.5038	0.132633	0.622682
hsa-let-7g_324881	14.5673	-0.63844	0.424995	-1.50223	0.133038	0.622682
hsa-mir-487b_270677	125.908	-0.614202	0.408969	-1.50183	0.133141	0.622682
hsa-mir-185_32536	70.0999	-0.464328	0.309222	-1.5016	0.133201	0.622682
hsa-mir-26a-2_138478	46.3178	-0.489007	0.325685	-1.50147	0.133234	0.622682
hsa_piR_016677|gb|DQ592953|Homo_sapiens_145511	29.4281	1.15406	0.768803	1.50111	0.133327	0.622682
hsa-let-7e_247600	29.1566	-0.561091	0.373819	-1.50097	0.133364	0.622682
ENST00000387400.1_242032	518.246	0.495765	0.330398	1.50051	0.133483	0.622682
hsa-mir-335_176788	35.5021	-0.610192	0.406758	-1.50013	0.13358	0.622682
RNY4-201_108534	17.7394	-0.701793	0.467837	-1.50008	0.133594	0.622682
hsa-mir-486-2_245656	190.547	0.475993	0.317489	1.49924	0.133811	0.622682
RNY4P16-201_317202	164.234	-0.637839	0.425696	-1.49834	0.134044	0.622682
hsa-mir-320d-1_227510	17.7909	0.596779	0.398577	1.49727	0.134322	0.622682
hsa-mir-23a_81573	79.7427	0.52078	0.347843	1.49717	0.134349	0.622682
RNY4P7-201_14080	72.0405	1.20631	0.805778	1.49708	0.134373	0.622682
hsa-mir-26b_256763	21.7499	-0.63625	0.425153	-1.49652	0.134518	0.622682
hsa-mir-1301_149058	14.9365	0.59997	0.400923	1.49647	0.13453	0.622682
hsa-mir-21_369532	15.4631	-0.874264	0.5846	-1.49549	0.134786	0.622682
ENST00000387400.1_327819	65.1928	0.674742	0.451376	1.49486	0.134952	0.622682
hsa-mir-92a-1_46137	38177.9	0.349345	0.233719	1.49473	0.134986	0.622682
hsa-mir-107_365784	69.6915	-0.444807	0.297854	-1.49337	0.13534	0.622682
hsa-mir-584_167110	22.1719	-0.63545	0.425893	-1.49204	0.135689	0.622682
hsa-mir-93_137706	131.59	-0.401941	0.269429	-1.49182	0.135745	0.622682
hsa-mir-186_294232	24.607	0.46721	0.313193	1.49177	0.13576	0.622682
hsa-mir-99a_189990	51.6595	0.572064	0.3835	1.49169	0.13578	0.622682
hsa-mir-26b_95108	17.8919	-0.465438	0.312028	-1.49166	0.135789	0.622682
hsa-mir-3184_384283	54.1042	0.76323	0.511689	1.49159	0.135807	0.622682
hsa-mir-370_94665	96.4683	-0.634845	0.425734	-1.49118	0.135915	0.622682
hsa-mir-487b_172009	680.823	-0.50628	0.339768	-1.49007	0.136205	0.622682
hsa-mir-92a-1_354683	160.166	-0.352	0.236237	-1.49003	0.136217	0.622682
hsa-mir-98_181750	145.234	-0.511163	0.34351	-1.48806	0.136736	0.623441
ENST00000387461.2_217952	16.6498	-0.784019	0.526928	-1.48791	0.136776	0.623441
hsa-mir-26b_254081	79.5173	0.274267	0.184376	1.48754	0.136873	0.623441
RNY4P10-201_49548	625.783	1.43695	0.967191	1.48569	0.137361	0.624436
hsa-mir-222_360567	111.849	0.393529	0.265078	1.48458	0.137655	0.624436
hsa-mir-92a-1_130206	35.0275	0.52863	0.356358	1.48342	0.137962	0.624436
hsa-let-7f-2_386158	76.0681	-0.415795	0.280314	-1.48332	0.13799	0.624436
hsa-mir-10b_166392	108.571	0.595185	0.401277	1.48323	0.138014	0.624436
hsa-mir-320a_349082	285.676	0.50396	0.339824	1.48301	0.138073	0.624436
hsa_piR_017723|gb|DQ594464|Homo_sapiens_204595	17.0976	0.888236	0.599976	1.48045	0.138752	0.626304
hsa-let-7b_77010	25.4635	0.3019	0.204046	1.47957	0.138989	0.626304
RNY4P16-201_236477	1541.11	-0.440556	0.297895	-1.4789	0.139168	0.626304
hsa-let-7b_382980	15.3011	0.417007	0.282169	1.47786	0.139444	0.626304
hsa-mir-26a-2_258584	1275.8	0.289585	0.195999	1.47748	0.139548	0.626304
hsa-mir-17_108999	31.988	-0.63942	0.43279	-1.47744	0.139559	0.626304
hsa-mir-199a-1_277816	61.9141	1.14679	0.77735	1.47525	0.140145	0.626304
hsa-mir-451b_25065	204.757	0.656061	0.444826	1.47487	0.140247	0.626304
RNY3P2-201_327755	40.9446	-0.786017	0.532948	-1.47485	0.140254	0.626304
hsa-mir-151a_243933	1606.15	-0.319124	0.216495	-1.47405	0.140469	0.626304
hsa-mir-664a_193649	24.5721	0.659312	0.447336	1.47386	0.140518	0.626304
RP11-694I15.3-003_60158	61.2665	1.17412	0.797069	1.47304	0.140739	0.626304
tRNA-Glu-CTC-1-1_267530	129.951	1.25216	0.850111	1.47294	0.140767	0.626304
hsa-let-7b_313571	616.277	0.404278	0.274481	1.47288	0.140783	0.626304
hsa-mir-26b_35208	112.791	0.394784	0.26836	1.4711	0.141264	0.627712
hsa-mir-340_9282	67.0357	-0.514497	0.350157	-1.46933	0.141743	0.62911
hsa-mir-3620_94849	17.0314	-0.642562	0.437601	-1.46837	0.142003	0.629191
hsa-mir-25_193357	22.6679	0.633044	0.431254	1.46791	0.142128	0.629191
RNY4P7-201_3984	29.9964	1.11788	0.762002	1.46703	0.142367	0.629191
ENST00000464816.1_171001	20.6741	0.934931	0.637627	1.46627	0.142576	0.629191
ENST00000410717.1_283120	792.605	-0.550428	0.375403	-1.46623	0.142586	0.629191
hsa-mir-425_86678	3573.73	-0.338701	0.231292	-1.46438	0.143089	0.629335
hsa-mir-10a_270052	25.3292	0.742059	0.506767	1.4643	0.143112	0.629335
RNY4P10-201_76417	58.4261	1.17345	0.801378	1.4643	0.143113	0.629335
RP3-337O18.1-012_85170	47.5169	0.902315	0.616812	1.46287	0.143503	0.629684
RNY4P10-201_383736	42.2028	1.25493	0.857946	1.46271	0.143545	0.629684
hsa-mir-486-2_387819	28.2141	0.730563	0.499634	1.4622	0.143687	0.629684
hsa-mir-191_20120	296.641	0.487043	0.333483	1.46047	0.14416	0.630506
hsa-mir-11400_256625	47.404	-0.833111	0.570599	-1.46006	0.144273	0.630506
hsa-let-7d_238696	390.975	0.268075	0.183662	1.45961	0.144397	0.630506
hsa-mir-21_235688	120.414	-0.542526	0.371942	-1.45863	0.144667	0.630506
hsa-mir-30d_292268	591.004	0.259474	0.177904	1.45851	0.144701	0.630506
SMC1A-202_91374	34.3471	1.13424	0.778133	1.45765	0.144938	0.630819
hsa-mir-28_275135	205.006	0.272811	0.187471	1.45522	0.14561	0.631646
hsa-mir-4433a_295873	46.9644	0.578521	0.397632	1.45492	0.145692	0.631646
hsa-mir-320b-1_313494	14.2124	0.671303	0.461425	1.45485	0.145712	0.631646
hsa-mir-3615_40268	23.9109	0.573312	0.394147	1.45456	0.14579	0.631646
hsa-let-7a-1_191359	16.0353	-0.521025	0.358393	-1.45378	0.146007	0.631646
hsa-mir-126_385000	17.3791	-0.632475	0.4355	-1.45229	0.14642	0.631646
hsa-mir-130b_74380	105.925	0.238901	0.164518	1.45213	0.146466	0.631646
AC015689.1-001_143202	40.411	0.967396	0.666367	1.45175	0.146572	0.631646
tRNA-Val-CAC-4-1_279091	36.3049	1.28713	0.886948	1.45119	0.146726	0.631646
hsa-mir-181b-2_174010	41.7404	-0.479641	0.330561	-1.45099	0.146783	0.631646
hsa-mir-3184_170600	18.5141	0.605282	0.417333	1.45036	0.146959	0.631687
hsa-mir-148b_386145	15.6662	-0.6612	0.456751	-1.44762	0.147725	0.631687
hsa-let-7f-2_321301	58451.3	-0.315096	0.217761	-1.44698	0.147902	0.631687
hsa-mir-150_351511	511.697	0.502418	0.347268	1.44677	0.147961	0.631687
hsa-mir-103b-1_314347	37.6254	-0.615017	0.425159	-1.44656	0.148021	0.631687
RNY4P10-201_274201	102.109	1.19166	0.824113	1.44599	0.148179	0.631687
hsa-mir-140_209039	18.9311	0.589409	0.407649	1.44587	0.148213	0.631687
hsa-mir-30b_343240	19.2399	-0.590703	0.40867	-1.44543	0.148338	0.631687
hsa-mir-374c_67124	2912.69	-0.383699	0.2655	-1.44519	0.148404	0.631687
hsa-mir-145_268308	28.7692	-0.648866	0.449087	-1.44486	0.148499	0.631687
hsa-let-7a-3_176574	15.6547	-0.802307	0.555518	-1.44425	0.148668	0.631687
ENST00000387347.2_286793	36.2301	0.72682	0.503574	1.44332	0.148929	0.631687
hsa-let-7e_218969	55.022	-0.48777	0.33835	-1.44162	0.149411	0.631687
hsa-let-7c_328305	14.1666	0.722431	0.501392	1.44085	0.149626	0.631687
hsa-mir-598_84647	16.437	-0.776174	0.538801	-1.44056	0.149709	0.631687
hsa-mir-154_303511	49.493	-0.709446	0.492547	-1.44036	0.149765	0.631687
RP11-161A14.2-001_13111	29.6164	0.667644	0.463713	1.43978	0.14993	0.631687
hsa-mir-10b_252256	85.6049	0.570182	0.396153	1.4393	0.150066	0.631687
ENST00000387460.2_88280	1220.56	-0.742906	0.516275	-1.43897	0.150158	0.631687
hsa-mir-378a_198668	24.444	-0.672574	0.467518	-1.43861	0.150262	0.631687
RP11-215L17.2-001_283792	14.4902	-0.749831	0.521228	-1.43859	0.150268	0.631687
hsa-mir-320a_220237	209.325	-0.451915	0.314291	-1.43789	0.150466	0.631825
hsa-mir-23b_25389	225.932	0.35844	0.249471	1.4368	0.150774	0.632421
hsa-let-7a-3_382347	238.407	-0.361465	0.25195	-1.43467	0.151381	0.63427
hsa-mir-486-2_185380	224.399	0.361057	0.251815	1.43382	0.151624	0.634592
hsa-let-7c_230503	925.358	0.236134	0.164816	1.43271	0.15194	0.634676
hsa-mir-370_210217	19.838	-0.843112	0.588607	-1.43238	0.152034	0.634676
hsa-mir-486-2_271979	135.553	0.449089	0.31369	1.43163	0.152249	0.634676
hsa-mir-26b_140017	64.9428	0.286918	0.200443	1.43142	0.152309	0.634676
RNY1-201_372714	1165.31	1.45113	1.01528	1.42929	0.152921	0.636532
ENST00000363624.1_347920	21.2095	-0.689621	0.483073	-1.42757	0.153416	0.637077
RNY4P7-201_167560	57.0185	1.13669	0.796608	1.42691	0.153605	0.637077
hsa-mir-25_169999	17.9979	0.545843	0.382541	1.42689	0.153612	0.637077
hsa-mir-101-1_9210	16.6356	-0.542532	0.380399	-1.42622	0.153805	0.637077
hsa_piR_016658|gb|DQ592931|Homo_sapiens_18870	25.2877	-0.739847	0.51885	-1.42594	0.153887	0.637077
ENST00000410794.1_87152	39.6807	0.755398	0.530496	1.42395	0.154462	0.638765
hsa-mir-181b-2_180859	30.573	-0.534242	0.375391	-1.42316	0.15469	0.638829
hsa-mir-374c_52659	238.315	-0.483961	0.340162	-1.42274	0.154812	0.638829
hsa-mir-625_88966	15.7634	-0.772275	0.543135	-1.42188	0.15506	0.638961
RNY4P10-201_75971	42.8165	1.12818	0.793667	1.42148	0.155179	0.638961
hsa-mir-194-1_189711	37.9844	0.557312	0.392478	1.41998	0.155613	0.639306
hsa-let-7f-2_4260	48.7713	-0.318588	0.224364	-1.41996	0.155619	0.639306
RNY1-201_320329	122.327	0.572128	0.403169	1.41908	0.155876	0.639306
tRNA-Leu-TAG-1-1_264928	19.6804	0.608456	0.429093	1.418	0.15619	0.639306
hsa-mir-142_55632	15.3475	0.489906	0.345697	1.41715	0.156438	0.639306
AC090260.5-001_326792	21.0161	-0.700845	0.494703	-1.4167	0.156571	0.639306
hsa-let-7f-2_159090	13.9245	-0.539097	0.380533	-1.41669	0.156574	0.639306
CTB-54O9.4-002_243193	14.2257	0.983603	0.694345	1.41659	0.156602	0.639306
hsa-let-7f-2_117550	2838.86	-0.305165	0.215736	-1.41453	0.157207	0.640407
hsa-mir-21_242786	126.474	-0.37566	0.265573	-1.41453	0.157208	0.640407
hsa_piR_016659|gb|DQ592932|Homo_sapiens_373640	13.2753	-0.67827	0.480385	-1.41193	0.15797	0.642829
hsa-mir-150_5049	22.8708	0.615451	0.436538	1.40985	0.158585	0.643964
hsa-mir-30a_85651	1047.41	0.331753	0.235418	1.40921	0.158774	0.643964
hsa-mir-320c-1_389181	116.674	0.499833	0.354855	1.40856	0.158966	0.643964
hsa-mir-144_126839	53.818	0.834825	0.592964	1.40789	0.159165	0.643964
hsa-mir-486-2_138652	595.521	0.325947	0.231655	1.40703	0.159417	0.643964
hsa-mir-3615_228758	70.5365	-0.406827	0.289202	-1.40672	0.15951	0.643964
RNY4P7-201_306687	54.036	1.14522	0.814598	1.40588	0.159761	0.643964
hsa-let-7i_66086	148.104	-0.291729	0.207513	-1.40583	0.159773	0.643964
ENST00000631292.1_117574	38.9798	-0.874803	0.622419	-1.40549	0.159876	0.643964
hsa-mir-16-1_227523	28.7391	0.309546	0.220745	1.40228	0.160831	0.643964
hsa-mir-92a-1_119155	57.5028	0.398858	0.284615	1.4014	0.161095	0.643964
hsa-mir-877_89505	13.6491	0.758237	0.541209	1.40101	0.161212	0.643964
hsa-mir-25_47345	2561.88	0.266679	0.190428	1.40042	0.161387	0.643964
hsa-mir-486-2_339588	37.8723	0.521633	0.372601	1.39998	0.16152	0.643964
RNY4P20-201_191518	306.197	1.30195	0.930179	1.39967	0.161611	0.643964
hsa-mir-132_322910	15.9905	0.691267	0.494085	1.39909	0.161787	0.643964
hsa-mir-26b_268966	29.5156	-0.585016	0.418212	-1.39885	0.161857	0.643964
ENST00000631292.1_241831	62.6042	-0.743792	0.531729	-1.39882	0.161867	0.643964
hsa-mir-26a-2_311153	37.5313	0.454088	0.324762	1.39822	0.162048	0.643964
hsa-mir-186_60176	14.4813	-0.563739	0.403241	-1.39802	0.162108	0.643964
hsa-mir-625_39885	17.4786	-0.752241	0.53809	-1.39799	0.162117	0.643964
hsa-mir-320a_307805	46.4897	-0.456483	0.32653	-1.39798	0.162118	0.643964
hsa-mir-339_142965	364.507	-0.270128	0.193232	-1.39794	0.16213	0.643964
hsa-mir-223_275125	188.791	-0.296334	0.212268	-1.39603	0.162705	0.643967
hsa-mir-182_83446	287.454	0.52775	0.378172	1.39553	0.162856	0.643967
hsa-mir-21_207515	21.6601	-0.367855	0.263847	-1.3942	0.163258	0.643967
hsa-mir-26a-2_12921	64283.2	-0.270024	0.193692	-1.39409	0.163292	0.643967
tRNA-Gly-CCC-2-1_56081	99.2762	1.21687	0.872928	1.39402	0.163313	0.643967
RNY1P12-201_58926	124.101	0.296777	0.212928	1.39379	0.163381	0.643967
RNY4P10-201_97039	279.501	1.30573	0.938122	1.39186	0.163965	0.643967
hsa-mir-151a_176992	19.9576	-0.481679	0.346073	-1.39184	0.16397	0.643967
hsa-mir-320a_23159	51.2092	-0.432417	0.310732	-1.39161	0.164041	0.643967
hsa_piR_000291|gb|DQ570344|Homo_sapiens_138454	80.8958	-0.372627	0.267772	-1.39158	0.164049	0.643967
RNY4P18-201_59605	26.9977	-1.2064	0.867225	-1.39111	0.164192	0.643967
hsa-let-7i_384371	33.4653	-0.379452	0.27284	-1.39075	0.164301	0.643967
hsa-mir-181c_49804	11.7274	0.70152	0.504445	1.39068	0.164324	0.643967
hsa-mir-26a-2_129175	1027.76	0.304078	0.218781	1.38988	0.164566	0.644254
tRNA-Pro-TGG-3-5_19618	65.8405	1.05057	0.757393	1.38709	0.165413	0.646593
hsa-mir-543_93913	192.749	-0.426564	0.307588	-1.3868	0.165502	0.646593
hsa-let-7b_287706	24.2655	0.422468	0.30476	1.38623	0.165677	0.646613
RNY4P6-201_74125	74.6643	1.1433	0.825111	1.38563	0.165861	0.646673
hsa-mir-106b_33071	55.9695	0.363911	0.263267	1.38229	0.166883	0.648712
hsa-mir-324_376540	13.515	0.509105	0.368381	1.38201	0.16697	0.648712
hsa-mir-454_343771	107.857	-0.482813	0.34964	-1.38089	0.167314	0.648712
hsa-mir-150_119626	49.063	0.456987	0.331039	1.38046	0.167445	0.648712
RNY4P17-201_255709	860.803	1.3729	0.994608	1.38034	0.167483	0.648712
hsa-mir-342_162983	13.927	-0.573017	0.415161	-1.38023	0.167516	0.648712
RNY1P12-201_242365	121.403	0.329767	0.239015	1.37969	0.167681	0.648712
RNY4P23-201_300108	261.405	0.457393	0.331567	1.37949	0.167744	0.648712
hsa-mir-25_69758	42.4478	-0.432923	0.314037	-1.37857	0.168027	0.649147
RNY1-201_196932	45.7126	1.05421	0.765375	1.37738	0.168396	0.649514
hsa-mir-130b_154977	41.5894	-0.540874	0.392745	-1.37716	0.168462	0.649514
hsa-mir-18a_126553	14.6579	-0.588549	0.427853	-1.37559	0.168949	0.650737
RNY3-201_379743	65.5384	-0.777074	0.565319	-1.37458	0.169263	0.651288
hsa-mir-15b_310857	2218.41	-0.27604	0.200981	-1.37347	0.169608	0.651549
RNY4P10-201_201208	638.505	1.35312	0.985712	1.37273	0.169836	0.651549
hsa-mir-26a-2_229542	64.9222	0.36385	0.265158	1.3722	0.170001	0.651549
hsa-mir-12136_190638	16.4373	0.968856	0.706081	1.37216	0.170014	0.651549
RNY4P10-201_101707	20.274	1.08187	0.789748	1.36989	0.17072	0.6536
hsa-mir-222_205827	690.906	-0.29533	0.215703	-1.36915	0.170952	0.653833
hsa-mir-320c-1_170897	24.5211	0.660712	0.483197	1.36738	0.171507	0.653985
hsa-mir-93_241697	130.636	-0.314054	0.229705	-1.36721	0.17156	0.653985
RNY4P20-201_222041	575.792	1.33443	0.976595	1.36642	0.171809	0.653985
tRNA-Asp-GTC-2-9_87812	20.4652	1.03151	0.754953	1.36633	0.171835	0.653985
hsa-mir-95_334212	53.7159	0.5334	0.390401	1.36629	0.171849	0.653985
hsa-mir-26b_15140	26.8119	-0.714939	0.524102	-1.36412	0.172529	0.654437
RNY3-201_253702	30.4919	-0.570112	0.417964	-1.36402	0.17256	0.654437
hsa-mir-26a-2_141330	31.2032	-0.350101	0.256716	-1.36377	0.172641	0.654437
hsa-mir-151a_89732	83.5109	-0.277771	0.203685	-1.36373	0.172653	0.654437
hsa-mir-92b_45138	32.1053	0.523138	0.384049	1.36217	0.173146	0.655201
RP11-694I15.3-001_326385	104.296	1.03983	0.763519	1.36189	0.173231	0.655201
ENST00000362512.1_73138	11.5513	-0.658669	0.483821	-1.36139	0.17339	0.655201
hsa-mir-16-2_164190	19.1956	0.376436	0.276808	1.35992	0.173856	0.655201
SMC1A-202_105051	120.495	0.963868	0.708949	1.35957	0.173965	0.655201
hsa-mir-584_89510	10.2374	-0.638848	0.469997	-1.35926	0.174065	0.655201
hsa-mir-340_345456	684.406	-0.360204	0.265034	-1.35908	0.17412	0.655201
hsa-let-7d_383741	346.087	0.290128	0.213592	1.35833	0.17436	0.655201
hsa-mir-17_322902	16.0606	-0.57382	0.422538	-1.35803	0.174453	0.655201
hsa-mir-146a_77366	19.6425	-0.597667	0.440218	-1.35766	0.174572	0.655201
hsa-mir-21_326357	364.321	-0.310834	0.229064	-1.35698	0.174789	0.655373
hsa-mir-30a_155313	21.1754	0.737833	0.544224	1.35575	0.175178	0.656026
hsa-mir-451b_125517	25.7962	0.974194	0.718778	1.35535	0.175307	0.656026
hsa-mir-432_167722	287.058	-0.546534	0.40393	-1.35304	0.176042	0.658017
hsa-mir-320b-1_287521	37.8656	-0.581229	0.429713	-1.3526	0.176184	0.658017
RNY4P7-201_48092	16.8724	-0.9874	0.730317	-1.35202	0.17637	0.658069
ENST00000387421.1_127711	28.7887	-1.12913	0.836405	-1.34999	0.177021	0.659852
hsa-let-7a-1_25858	341.179	-0.328092	0.243183	-1.34916	0.177286	0.660157
RNY4P10-201_282509	959.056	1.35867	1.00743	1.34865	0.177449	0.660157
hsa-mir-379_68424	35.2917	-0.613341	0.455123	-1.34764	0.177775	0.660644
hsa-mir-223_113424	43.6748	-0.27167	0.20169	-1.34697	0.17799	0.660644
ENST00000365448.1_96188	62.7382	0.667948	0.496446	1.34546	0.178477	0.660644
tRNA-Glu-CTC-1-1_154090	282.444	1.27263	0.946078	1.34516	0.178573	0.660644
hsa-mir-146b_136615	124.712	-0.433119	0.322172	-1.34437	0.178829	0.660644
hsa-mir-16-1_277185	14.1563	0.629448	0.468363	1.34393	0.178971	0.660644
hsa-mir-191_210740	1378.07	-0.200603	0.149368	-1.34301	0.179268	0.660644
hsa-mir-130a_13434	89.4565	-0.388101	0.289034	-1.34275	0.179352	0.660644
hsa-mir-152_98966	692.013	-0.25586	0.190642	-1.3421	0.179564	0.660644
hsa-mir-222_216660	38.1601	0.455631	0.339524	1.34197	0.179606	0.660644
hsa-mir-148b_89366	200.477	-0.421444	0.314097	-1.34176	0.179672	0.660644
RNY4P6-201_240315	31.7193	1.07987	0.804938	1.34155	0.179742	0.660644
hsa-mir-126_129638	14.6505	0.622832	0.464356	1.34128	0.17983	0.660644
hsa-mir-26a-2_138135	68.3925	0.414281	0.309265	1.33957	0.180386	0.661985
ENST00000445125.2_340468	33.853	0.739674	0.552414	1.33898	0.180576	0.661985
RNY4P10-201_336474	593.42	1.14452	0.855319	1.33812	0.180857	0.661985
hsa-mir-324_265565	20.4634	0.533272	0.398677	1.3376	0.181025	0.661985
RNY1-201_373291	62.6977	0.383734	0.287026	1.33693	0.181246	0.661985
RP11-752G15.5-002_350775	1050.77	-0.249084	0.186405	-1.33625	0.181467	0.661985
hsa-mir-7-1_43281	48.9862	0.643579	0.481675	1.33613	0.181507	0.661985
hsa-mir-26b_229984	17.2774	0.427449	0.320134	1.33522	0.181804	0.661985
RNY4P16-201_282944	610.039	0.392926	0.294405	1.33465	0.181992	0.661985
hsa-mir-425_225847	191.779	0.272655	0.204333	1.33436	0.182084	0.661985
hsa-mir-99a_351109	60.1499	0.469755	0.352058	1.33431	0.182102	0.661985
hsa-mir-3184_116800	253.661	0.404786	0.303747	1.33264	0.182649	0.663342
hsa-mir-654_370409	616.697	-0.486979	0.365713	-1.33159	0.182995	0.663967
hsa-mir-1908_147927	107.587	-0.327228	0.246332	-1.3284	0.184045	0.664253
hsa-let-7e_20074	505.461	-0.188883	0.142206	-1.32824	0.1841	0.664253
hsa-mir-532_244111	24.4535	0.646637	0.486882	1.32812	0.184139	0.664253
hsa-mir-486-2_29847	36.5737	0.678003	0.5108	1.32733	0.184398	0.664253
hsa-let-7f-2_67899	60.2856	0.379892	0.286258	1.32709	0.184478	0.664253
MT-CO2-201_9976	33.7625	0.607332	0.457676	1.32699	0.184511	0.664253
hsa-mir-186_161726	20.2997	-0.629887	0.474794	-1.32665	0.184624	0.664253
hsa-mir-16-2_323337	89.6277	0.577777	0.435521	1.32663	0.18463	0.664253
ENST00000387400.1_105237	22.6065	0.653808	0.492844	1.3266	0.184641	0.664253
hsa-mir-92a-2_328257	25.6991	0.429738	0.324349	1.32492	0.185197	0.665627
hsa-mir-196b_303320	30.0923	-0.566319	0.427788	-1.32383	0.185559	0.665656
hsa-mir-1249_351187	130.636	0.290572	0.219575	1.32334	0.185722	0.665656
hsa-mir-4433a_240937	360.508	0.459697	0.347584	1.32255	0.185985	0.665656
ENST00000387460.2_64782	17.704	-0.82125	0.620984	-1.3225	0.186003	0.665656
hsa-mir-532_375881	39.065	0.564019	0.426673	1.3219	0.186202	0.665656
ENST00000410794.1_318435	69.7267	0.623245	0.47153	1.32175	0.186251	0.665656
hsa-mir-7-1_303869	41.0178	-0.374701	0.283635	-1.32107	0.186479	0.665773
RP11-317N8.1-001_181822	50.5924	0.670742	0.507904	1.32061	0.186633	0.665773
hsa-mir-16-1_32936	197.963	0.278034	0.210659	1.31983	0.186892	0.666076
hsa-mir-140_372828	36.1353	-0.401987	0.304967	-1.31813	0.187459	0.667193
hsa-mir-151a_105895	19.1737	0.506063	0.384168	1.31729	0.18774	0.667193
hsa-let-7i_153634	19.2135	-0.345331	0.262407	-1.31601	0.18817	0.667193
hsa-let-7d_265944	39.0359	-0.528802	0.402032	-1.31532	0.188402	0.667193
hsa-mir-3615_162933	57.1385	0.381671	0.290199	1.31521	0.188441	0.667193
hsa-mir-196b_278020	89.138	-0.354578	0.269694	-1.31474	0.188596	0.667193
hsa-mir-10b_190341	33.4601	0.585949	0.445756	1.31451	0.188676	0.667193
hsa-mir-221_251346	2527.17	-0.232944	0.177257	-1.31416	0.188794	0.667193
hsa-let-7i_57189	521.852	0.309356	0.235472	1.31377	0.188924	0.667193
ENST00000500358.6_53779	92.3291	0.926043	0.705247	1.31308	0.189157	0.667193
hsa-mir-22_251695	28.3142	0.52442	0.399414	1.31297	0.189192	0.667193
hsa-mir-182_250289	370.028	0.351839	0.268232	1.3117	0.189622	0.667193
hsa-mir-155_280158	139.521	0.310571	0.236845	1.31129	0.189761	0.667193
hsa-mir-92a-2_275239	59.2756	-0.503723	0.384175	-1.31118	0.189796	0.667193
hsa-mir-150_154997	358.928	0.446188	0.340318	1.31109	0.189827	0.667193
RNY4P27-201_328392	517.299	1.27204	0.971075	1.30993	0.19022	0.66736
RNY4P10-201_119772	234.358	1.18894	0.908664	1.30845	0.190722	0.66736
hsa-mir-15a_196342	190.431	-0.334153	0.255566	-1.3075	0.191041	0.66736
RNY4-201_298928	19.7882	-1.02291	0.782521	-1.30719	0.191147	0.66736
hsa-mir-151a_204748	79.7061	-0.234222	0.179196	-1.30707	0.191188	0.66736
hsa-mir-140_185995	1831.97	0.256403	0.196167	1.30707	0.191191	0.66736
hsa-mir-26b_270786	20.2074	-0.369018	0.282525	-1.30614	0.191504	0.66736
hsa-mir-330_145504	31.8986	-0.572081	0.438124	-1.30575	0.191637	0.66736
hsa-mir-320a_176483	544.578	0.349759	0.267879	1.30566	0.191668	0.66736
hsa-mir-200c_81015	104.496	-0.336779	0.258037	-1.30516	0.191839	0.66736
RNY4P23-201_292258	102.871	0.647326	0.496077	1.30489	0.191931	0.66736
hsa-mir-21_118279	54.964	-0.287117	0.220053	-1.30476	0.191973	0.66736
hsa-mir-151a_373888	17.7323	0.554039	0.424908	1.3039	0.192266	0.667771
hsa-mir-451b_310112	4531.65	0.46393	0.356272	1.30218	0.192855	0.669206
hsa-mir-140_331434	124.91	-0.263856	0.202818	-1.30095	0.193275	0.669814
hsa-let-7e_273015	21.6503	-0.474043	0.364487	-1.30057	0.193404	0.669814
hsa-mir-142_225748	14.4066	0.612573	0.471203	1.30002	0.193594	0.669814
hsa-mir-9-2_236307	48.9291	0.587306	0.452082	1.29911	0.193905	0.669814
hsa-mir-142_39983	780.107	-0.387068	0.298299	-1.29759	0.19443	0.669814
hsa-mir-409_150512	32.6562	-0.679259	0.523487	-1.29757	0.194436	0.669814
hsa-mir-199a-1_93671	34.5051	-0.4824	0.371797	-1.29748	0.194465	0.669814
ENST00000516950.1_52656	484.201	1.23659	0.953447	1.29697	0.194642	0.669814
RNY4P9-201_368197	304.55	1.2086	0.932019	1.29675	0.194717	0.669814
hsa-mir-221_22501	23.3317	-0.673303	0.519476	-1.29612	0.194934	0.669814
hsa-mir-140_246794	25.3706	-0.521653	0.402496	-1.29604	0.19496	0.669814
hsa-let-7d_84425	13.1456	0.578402	0.446563	1.29523	0.195241	0.670174
hsa-mir-769_354947	18.3729	-0.549229	0.424252	-1.29458	0.195464	0.670339
hsa-mir-148a_328640	113.519	-0.480485	0.371497	-1.29338	0.195881	0.671165
hsa-mir-486-2_34183	38.198	-0.389278	0.301232	-1.29229	0.196258	0.671852
tRNA-Gly-CCC-2-2_338638	14.3342	-0.704446	0.545686	-1.29094	0.196726	0.672851
RNY3P2-201_132129	75.674	-0.689131	0.534766	-1.28866	0.197516	0.67452
hsa-let-7d_293056	16.3732	-0.364919	0.283251	-1.28832	0.197633	0.67452
hsa-mir-342_320143	38.7547	-0.522205	0.405437	-1.28801	0.197744	0.67452
hsa-mir-320a_339339	22.2465	-0.475933	0.369779	-1.28707	0.198068	0.675024
hsa-mir-432_198137	56.2755	-0.581319	0.452155	-1.28566	0.198561	0.675279
hsa-mir-301b_73971	17.1314	0.677515	0.527092	1.28538	0.198659	0.675279
hsa-mir-376a-1_268398	19.2936	-0.719412	0.559793	-1.28514	0.198744	0.675279
hsa-mir-3615_27665	14.0578	0.506436	0.394263	1.28451	0.198963	0.675279
hsa-mir-16-2_122524	175.981	0.401141	0.312429	1.28394	0.199161	0.675279
hsa-mir-486-2_271985	279.825	0.263401	0.20517	1.28382	0.199205	0.675279
hsa-mir-30a_148664	24.9805	0.60015	0.46816	1.28193	0.199866	0.676541
hsa-mir-92a-1_15745	24.6532	0.586422	0.457517	1.28175	0.199931	0.676541
hsa-mir-342_285672	23.1748	0.538661	0.421234	1.27877	0.200978	0.679021
hsa-mir-24-2_99744	44.0337	-0.438548	0.342977	-1.27865	0.20102	0.679021
hsa-mir-486-2_293096	81.7489	0.303668	0.237593	1.2781	0.201214	0.679075
hsa-mir-222_327846	235.856	-0.182136	0.142591	-1.27734	0.201483	0.679143
hsa-mir-154_324056	36.8042	-0.868985	0.680714	-1.27658	0.201751	0.679143
hsa-mir-486-2_220203	111.237	0.409377	0.320824	1.27602	0.20195	0.679143
hsa-mir-26a-2_319995	18.3694	-0.466936	0.366127	-1.27534	0.20219	0.679143
RNY4P10-201_340165	25.9448	0.945153	0.741262	1.27506	0.202289	0.679143
hsa-let-7e_186169	24.0775	-0.557991	0.437647	-1.27498	0.202316	0.679143
hsa-let-7i_141053	39.2838	-0.523755	0.410943	-1.27452	0.20248	0.679143
hsa-mir-185_81680	1640.79	-0.174675	0.13717	-1.27341	0.202871	0.679441
hsa-mir-21_147762	44.6984	0.369277	0.2902	1.27249	0.203199	0.679441
hsa-let-7i_52329	74.1442	-0.561342	0.441465	-1.27154	0.203536	0.679441
ENST00000364596.1_135025	15.3884	-0.763505	0.600604	-1.27123	0.203647	0.679441
hsa-mir-127_217052	26.9904	-0.512472	0.403235	-1.2709	0.203764	0.679441
hsa-mir-1249_32126	14.5964	-0.728493	0.573336	-1.27062	0.203863	0.679441
hsa-mir-106b_85315	10.5007	-0.660175	0.51994	-1.26972	0.204186	0.679441
hsa-mir-150_82508	51.8704	0.479397	0.37767	1.26936	0.204314	0.679441
hsa-mir-26a-2_388644	80.9413	-0.424506	0.33443	-1.26934	0.204318	0.679441
ENST00000500358.6_271709	84.6235	0.930296	0.732944	1.26926	0.204349	0.679441
hsa-mir-19a_287325	173.256	-0.441529	0.348755	-1.26602	0.205507	0.680577
hsa-let-7g_183744	72.6827	-0.475558	0.375737	-1.26567	0.205633	0.680577
hsa-mir-181a-1_291010	98.3512	-0.342244	0.270412	-1.26564	0.205641	0.680577
hsa-mir-30e_18661	192.746	-0.234369	0.185183	-1.26561	0.205652	0.680577
RNY1-201_12910	24.5153	1.06993	0.845443	1.26553	0.205683	0.680577
RNY4P10-201_323683	49.3478	1.07163	0.84693	1.26531	0.20576	0.680577
RNY4P20-201_215136	408.922	0.440006	0.348299	1.2633	0.206482	0.681604
ENST00000384478.1_23036	72.1478	0.309029	0.244622	1.26329	0.206485	0.681604
hsa-mir-16-2_377040	39.869	0.30738	0.243382	1.26295	0.206606	0.681604
RP11-694I15.3-003_20360	29.3939	0.971084	0.769374	1.26217	0.206886	0.681938
hsa-mir-3184_23240	37.1498	-0.408298	0.323638	-1.26159	0.207097	0.682044
hsa-mir-25_2368	199.472	0.201584	0.16006	1.25943	0.207876	0.68402
RP11-18O13.1-004_115585	60.5314	0.684574	0.543965	1.25849	0.208215	0.684498
hsa-mir-345_178322	17.0098	-0.527177	0.419049	-1.25803	0.20838	0.684498
hsa-mir-361_277613	21.1285	0.388589	0.30908	1.25724	0.208665	0.684844
hsa-mir-381_297718	148.619	-0.514435	0.409961	-1.25484	0.209537	0.686182
RP11-227B21.1-001_47126	59.6192	0.943587	0.752465	1.25399	0.209844	0.686182
hsa-mir-140_52225	47.7176	-0.464736	0.370641	-1.25387	0.209888	0.686182
hsa-mir-25_107390	26.3493	0.207592	0.165574	1.25377	0.209924	0.686182
hsa-mir-98_53756	14.1332	-0.692798	0.552627	-1.25364	0.209971	0.686182
hsa-mir-152_178998	34.4666	-0.446859	0.356948	-1.25189	0.21061	0.687681
hsa-mir-92a-1_43606	244.175	0.262782	0.210214	1.25007	0.211274	0.689258
hsa-mir-126_365762	54.2302	-0.407103	0.326309	-1.2476	0.212179	0.691619
hsa-mir-382_79913	44.8548	-0.526732	0.422471	-1.24679	0.212475	0.691887
RP11-846F4.3-001_3599	12.8474	0.531509	0.426595	1.24593	0.212789	0.691887
hsa-mir-26b_110402	61.3457	-0.384424	0.308869	-1.24462	0.213272	0.691887
hsa-mir-23b_302650	51.3242	0.581385	0.467164	1.2445	0.213316	0.691887
hsa-mir-181a-2_271230	23.0153	-0.549169	0.44141	-1.24412	0.213454	0.691887
hsa-mir-181a-2_230799	97.9565	-1.00013	0.803991	-1.24395	0.213517	0.691887
hsa-mir-345_263957	25.7008	0.512047	0.41164	1.24392	0.21353	0.691887
hsa-mir-486-2_156609	110.687	0.419736	0.337729	1.24282	0.213935	0.692318
ENST00000445125.2_361331	46.5679	0.56104	0.451651	1.2422	0.214163	0.692318
LA16c-390E6.1-002_195126	29.4759	0.916904	0.738464	1.24164	0.214371	0.692318
SMC1A-202_62712	58.9565	0.948252	0.76417	1.24089	0.214646	0.692318
RP11-694I15.3-003_255096	112.089	0.844823	0.680852	1.24083	0.214668	0.692318
hsa-mir-15a_293290	16.5209	0.786632	0.634299	1.24016	0.214916	0.692318
RNY4P16-201_260194	250.266	0.4353	0.351015	1.24012	0.214932	0.692318
ENST00000500358.6_102786	67.2328	0.920479	0.742834	1.23914	0.215292	0.692892
RNY4P16-201_40364	23.515	-0.712612	0.575563	-1.23811	0.215675	0.693471
RNY4-201_379762	40.8087	-0.43355	0.350314	-1.2376	0.215863	0.693471
hsa-mir-142_75628	45.9662	0.520106	0.420456	1.237	0.216086	0.693471
RNY4P10-201_181448	71.0568	1.05829	0.856289	1.23591	0.216493	0.693471
ENST00000387342.1_296025	21.4613	-1.04489	0.845447	-1.2359	0.216497	0.693471
hsa-mir-664a_148043	19.6917	-0.536049	0.433795	-1.23572	0.216562	0.693471
RP11-846F4.3-001_67294	15.3762	-0.61095	0.49488	-1.23454	0.217001	0.694293
RNY4P16-201_38229	719.932	-0.312684	0.253541	-1.23327	0.217477	0.695233
ENST00000572227.1_77856	49.7986	0.776657	0.630044	1.2327	0.217687	0.695323
hsa-mir-21_106184	36.0993	-0.304571	0.247269	-1.23174	0.218046	0.695418
hsa-mir-1307_62707	84.6145	-0.367848	0.298664	-1.23165	0.218081	0.695418
hsa_piR_020326|gb|DQ597916|Homo_sapiens_29076	88.1746	-0.616412	0.501249	-1.22975	0.21879	0.696692
hsa-mir-320a_232688	168.953	0.294718	0.239702	1.22951	0.218879	0.696692
hsa-mir-34a_267422	11.3046	-0.75281	0.612481	-1.22912	0.219028	0.696692
ENST00000387441.1_250030	30.9391	1.0641	0.866658	1.22782	0.219516	0.697661
hsa-mir-30e_186936	5441.96	-0.169852	0.138578	-1.22567	0.220322	0.699642
hsa-mir-30d_131142	1274.66	0.197997	0.1618	1.22372	0.221059	0.70046
hsa-mir-28_173944	74.8535	0.362608	0.29632	1.2237	0.221065	0.70046
hsa-mir-361_123477	25.787	0.572321	0.467763	1.22353	0.22113	0.70046
hsa-mir-629_132800	19.8778	0.576797	0.471903	1.22228	0.221603	0.700589
ENST00000364596.1_191437	29.6835	-0.667508	0.546191	-1.22212	0.221664	0.700589
SMC1A-202_186134	143.578	0.8377	0.685536	1.22196	0.221722	0.700589
hsa-mir-486-2_188471	65.8566	0.49636	0.406634	1.22065	0.222217	0.701345
hsa-mir-150_80110	1105.73	0.421848	0.345712	1.22023	0.222378	0.701345
hsa-mir-671_162937	22.3284	-0.681134	0.558364	-1.21988	0.222512	0.701345
hsa-mir-222_139762	18.236	-0.58449	0.480216	-1.21714	0.223551	0.703501
RNY1-201_135799	15.2387	-0.640784	0.526482	-1.2171	0.223565	0.703501
tRNA-Glu-CTC-1-7_341161	44.0168	-0.986837	0.811524	-1.21603	0.223974	0.703951
hsa-mir-30e_66287	34.7037	-0.467864	0.385013	-1.21519	0.224294	0.703951
hsa-mir-92a-1_189169	24.5089	0.348574	0.286891	1.215	0.224365	0.703951
hsa-mir-134_169320	22.5032	-0.645997	0.531921	-1.21446	0.224572	0.703951
hsa-mir-15b_323026	152.34	0.529929	0.436685	1.21353	0.224929	0.703951
hsa-mir-320a_377219	4158.16	-0.295449	0.243472	-1.21348	0.224946	0.703951
tRNA-Gly-CCC-1-1_16018	122.415	1.02543	0.845131	1.21334	0.224999	0.703951
hsa-mir-484_86165	73.2239	0.225047	0.185704	1.21186	0.225566	0.705063
hsa-mir-486-2_348346	133.434	0.267957	0.221365	1.21048	0.226096	0.705063
hsa-mir-223_300599	625.481	-0.302699	0.250198	-1.20984	0.22634	0.705063
hsa-mir-331_55989	22.0606	-0.543315	0.449138	-1.20968	0.2264	0.705063
hsa-mir-532_25486	48.8616	-0.281771	0.23304	-1.20911	0.226621	0.705063
hsa-mir-21_245837	215.68	-0.308909	0.255586	-1.20863	0.226805	0.705063
hsa_piR_016658|gb|DQ592931|Homo_sapiens_355730	48.7545	-0.42782	0.35399	-1.20856	0.226831	0.705063
ENST00000387377.1_91686	17.3136	0.667889	0.552632	1.20856	0.226832	0.705063
hsa-mir-223_144033	24.0057	-0.471792	0.390774	-1.20733	0.227307	0.705964
hsa-mir-151a_232266	888.556	-0.231023	0.1915	-1.20639	0.227668	0.706512
ENST00000387347.2_197272	16.2316	0.716455	0.594236	1.20567	0.227943	0.706716
ENST00000390880.2_389479	13.9965	-0.676108	0.560966	-1.20526	0.228104	0.706716
hsa-mir-1307_331045	17.9724	-0.455003	0.377884	-1.20408	0.228558	0.707147
tRNA-Lys-CTT-4-1_80054	32.4551	-0.502774	0.417688	-1.20371	0.228703	0.707147
hsa-mir-433_55275	107.279	-0.460296	0.382478	-1.20346	0.228799	0.707147
hsa-mir-30c-2_322632	232.858	0.354939	0.295419	1.20148	0.229566	0.708943
hsa-mir-27b_357526	19.5127	-0.460592	0.384054	-1.19929	0.230415	0.709561
hsa-mir-744_281284	14.5741	-0.602145	0.502453	-1.19841	0.230757	0.709561
hsa-mir-221_167661	4955.51	-0.2173	0.181379	-1.19804	0.2309	0.709561
RNY1-201_334946	2175.68	1.24092	1.0362	1.19756	0.231087	0.709561
hsa-mir-1307_68733	108.741	-0.263345	0.219903	-1.19755	0.231093	0.709561
hsa-mir-409_234067	531.761	-0.379171	0.316674	-1.19736	0.231168	0.709561
hsa-let-7f-2_275609	7519.19	-0.205856	0.172011	-1.19676	0.231398	0.709561
hsa-mir-148a_40664	289.232	0.37079	0.309836	1.19673	0.231412	0.709561
hsa-mir-3184_15621	35.3893	0.412739	0.345056	1.19615	0.231638	0.709561
hsa-mir-25_231405	18.6671	0.419038	0.350498	1.19555	0.231871	0.709561
hsa-mir-21_329161	54.1154	-0.301198	0.252033	-1.19507	0.232059	0.709561
RNY4P10-201_73956	364.472	1.1393	0.953437	1.19494	0.23211	0.709561
hsa-mir-29a_36837	1126.33	-0.232387	0.194603	-1.19416	0.232417	0.709561
hsa-mir-26a-2_116873	28.3202	-0.586298	0.491171	-1.19367	0.232606	0.709561
RNY4P10-201_265734	42.1833	0.97137	0.814417	1.19272	0.23298	0.709561
hsa-mir-126_74195	29.9804	-0.247365	0.207444	-1.19244	0.233088	0.709561
hsa-mir-425_314895	20.3099	0.502205	0.421634	1.19109	0.233617	0.709561
hsa-mir-486-2_228667	38.2744	0.56969	0.478476	1.19064	0.233796	0.709561
hsa-mir-3184_120918	18.9397	0.484603	0.407183	1.19013	0.233994	0.709561
hsa-mir-30a_109525	20.1538	-0.647101	0.54394	-1.18966	0.234182	0.709561
tRNA-Val-CAC-3-1_66062	47.4843	0.936084	0.786869	1.18963	0.234191	0.709561
ENST00000445125.2_269959	315.72	0.62382	0.524524	1.18931	0.234319	0.709561
hsa-mir-22_17192	64.5721	-0.344296	0.289704	-1.18844	0.23466	0.709561
hsa_piR_009295|gb|DQ582567|Homo_sapiens_39807	76.1715	1.01316	0.852838	1.18799	0.234837	0.709561
hsa-let-7e_138736	160.768	-0.2442	0.205624	-1.1876	0.23499	0.709561
hsa-mir-221_65081	52.0441	0.403506	0.339995	1.1868	0.235307	0.709561
hsa-mir-143_137405	298.945	-0.357345	0.301239	-1.18625	0.235523	0.709561
hsa-mir-199a-1_163834	18.8219	-0.538851	0.454327	-1.18604	0.235606	0.709561
hsa-mir-106b_362808	30.7883	-0.446975	0.376919	-1.18587	0.235675	0.709561
hsa-mir-15b_22930	88.3784	-0.328048	0.276639	-1.18583	0.235688	0.709561
ENST00000363120.1_120044	31.7187	1.0052	0.848356	1.18488	0.236067	0.709561
ENST00000445125.2_208216	97.9694	0.555139	0.468665	1.18451	0.23621	0.709561
hsa-mir-1843_142868	28.2473	-0.441803	0.373577	-1.18263	0.236956	0.709561
hsa-let-7g_133155	16.6026	-0.538516	0.455404	-1.1825	0.237007	0.709561
hsa-mir-486-2_346953	40.2846	0.456246	0.386071	1.18177	0.237298	0.709561
hsa-mir-484_235708	177.823	0.194062	0.164274	1.18134	0.237469	0.709561
hsa-mir-103b-1_293752	59.7243	-0.535802	0.45361	-1.1812	0.237525	0.709561
hsa-mir-15b_43976	11.5054	0.569184	0.481976	1.18094	0.237627	0.709561
hsa-let-7f-2_225818	90.1184	-0.379866	0.321808	-1.18041	0.237837	0.709561
hsa-let-7b_185161	77.9669	0.300083	0.254223	1.1804	0.237843	0.709561
AC074130.2-001_341184	38.6446	0.80238	0.680019	1.17994	0.238025	0.709561
hsa_piR_016658|gb|DQ592931|Homo_sapiens_44262	15.5801	-0.898349	0.761412	-1.17984	0.238062	0.709561
hsa-let-7d_176007	28.2746	-0.467541	0.396415	-1.17942	0.23823	0.709561
hsa-mir-200b_191296	10.724	-0.483278	0.40996	-1.17884	0.238461	0.709561
hsa-mir-374a_189382	1479.31	-0.35625	0.302281	-1.17854	0.238582	0.709561
hsa-mir-151a_178424	27.6627	-0.410353	0.348242	-1.17836	0.238655	0.709561
hsa-let-7a-3_352218	14.2253	0.482706	0.409644	1.17836	0.238655	0.709561
hsa_piR_016659|gb|DQ592932|Homo_sapiens_197917	173.392	-0.354454	0.300826	-1.17827	0.238689	0.709561
RNY4P7-201_49796	42.7933	0.934699	0.794923	1.17584	0.239661	0.711894
hsa-mir-486-2_299908	15.9528	0.343327	0.292404	1.17415	0.240334	0.713138
RNY4P23-201_12592	543.365	0.396096	0.337432	1.17386	0.240453	0.713138
hsa-mir-199a-1_309133	1392.38	-0.232385	0.198097	-1.17309	0.240761	0.713498
hsa-mir-320a_16656	19.5501	0.290593	0.247901	1.17221	0.241111	0.713611
hsa-mir-30c-2_69222	15.3003	-0.472774	0.403456	-1.17181	0.241273	0.713611
hsa-mir-186_25085	1033.78	-0.182428	0.155733	-1.17142	0.24143	0.713611
hsa-mir-92a-1_191157	345.679	-0.309669	0.264495	-1.17079	0.241682	0.713611
hsa-mir-1273h_387490	19.0394	-0.774874	0.662064	-1.17039	0.241844	0.713611
hsa-mir-25_196240	54.6616	0.604316	0.516422	1.1702	0.241921	0.713611
RP11-317N8.1-001_185862	42.1156	0.56362	0.482544	1.16802	0.242799	0.715649
hsa-mir-3184_105639	10.8402	0.616242	0.527905	1.16733	0.243075	0.71591
hsa-mir-106b_130288	1443.59	0.295274	0.253089	1.16668	0.24334	0.716135
hsa-mir-484_49919	86.9964	-0.271493	0.233001	-1.1652	0.243936	0.717295
RP11-382F24.7-001_260955	42.0701	-0.636211	0.546238	-1.16471	0.244135	0.717295
hsa-mir-326_23508	16.2425	-0.526671	0.452365	-1.16426	0.244318	0.717295
RP11-215L17.2-001_172696	16.7093	-0.735028	0.63155	-1.16385	0.244486	0.717295
hsa-let-7a-1_32851	25.5758	-0.525511	0.451902	-1.16289	0.244875	0.717586
ENST00000362330.2_229058	171.708	1.00984	0.868545	1.16268	0.24496	0.717586
RNY4-201_221171	197.317	-0.358389	0.309229	-1.15897	0.246466	0.720048
hsa-mir-654_105890	25.0771	-0.605505	0.522505	-1.15885	0.246518	0.720048
tRNA-Pro-TGG-1-1_313115	350.401	0.712381	0.615179	1.15801	0.246861	0.720048
hsa-mir-4742_170397	12.9881	0.50803	0.438877	1.15757	0.247041	0.720048
tRNA-iMet-CAT-1-8_115116	34.6881	-0.343516	0.297029	-1.15651	0.247473	0.720048
hsa-mir-126_384889	16.897	0.315548	0.272916	1.15621	0.247595	0.720048
hsa-mir-27b_229390	87.6211	0.333178	0.288203	1.15605	0.247659	0.720048
hsa-mir-16-2_43754	32.2294	-0.420047	0.363521	-1.1555	0.247887	0.720048
RNY4P27-201_388791	13475.8	1.31201	1.13586	1.15508	0.248059	0.720048
hsa-mir-151a_22148	83.7316	-0.334738	0.289833	-1.15493	0.248118	0.720048
RNY4P10-201_82721	1402.07	0.309317	0.267881	1.15468	0.248221	0.720048
hsa-let-7g_315748	19.3962	-0.314489	0.272375	-1.15462	0.248247	0.720048
hsa-mir-107_1886	22.1803	-0.523744	0.453899	-1.15388	0.24855	0.720048
hsa-mir-151a_116147	16.1111	0.511962	0.443884	1.15337	0.248759	0.720048
hsa-mir-223_166714	268.017	-0.216529	0.187756	-1.15325	0.24881	0.720048
hsa-mir-26b_213301	30.7497	0.556899	0.483033	1.15292	0.248943	0.720048
RP11-469L3.1-001_60872	21.1785	0.786707	0.683046	1.15176	0.249418	0.720048
hsa-let-7i_219058	14.4214	-0.599219	0.520774	-1.15063	0.249884	0.720048
hsa-mir-320a_140039	80.1567	-0.339218	0.294812	-1.15063	0.249886	0.720048
hsa-mir-550b-2_7575	37.7979	0.561439	0.4883	1.14978	0.250233	0.720048
hsa-mir-16-1_332891	34.5361	0.377068	0.328063	1.14938	0.2504	0.720048
hsa-mir-181a-2_256758	12.4017	-0.588557	0.512118	-1.14926	0.250448	0.720048
hsa-mir-425_184806	3873.78	0.159501	0.138803	1.14912	0.250507	0.720048
hsa-mir-24-2_190898	784.256	-0.135087	0.117583	-1.14887	0.25061	0.720048
hsa-mir-30d_88064	27.2371	0.238047	0.207207	1.14884	0.250623	0.720048
hsa-mir-486-2_298116	16.6687	-0.609463	0.53069	-1.14844	0.250789	0.720048
RNY4-201_377845	33.3465	-0.883627	0.77028	-1.14715	0.251319	0.720048
hsa-mir-28_9153	16.0865	0.539837	0.470678	1.14694	0.251408	0.720048
hsa-mir-92a-1_262441	24.1055	0.4051	0.353228	1.14685	0.251443	0.720048
hsa-mir-185_167094	12.2568	-0.503878	0.439374	-1.14681	0.25146	0.720048
hsa-mir-199a-1_198796	57.1955	0.880773	0.771503	1.14163	0.253607	0.724739
hsa-mir-1307_235905	18.9371	-0.449819	0.394139	-1.14127	0.253757	0.724739
hsa-mir-484_313722	50.8376	0.214412	0.187894	1.14113	0.253814	0.724739
hsa-mir-10399_83310	21.5569	-0.460634	0.403701	-1.14103	0.253858	0.724739
RP11-752G15.5-002_342140	32.2443	-0.422474	0.371156	-1.13827	0.25501	0.726052
ENST00000445125.2_335781	35.3235	0.82318	0.723228	1.1382	0.255036	0.726052
hsa-mir-24-2_131159	35.4892	0.402985	0.354134	1.13794	0.255144	0.726052
hsa-mir-24-2_89954	129.509	-0.273973	0.240829	-1.13762	0.255277	0.726052
hsa-let-7g_385718	12.5758	-0.474944	0.417622	-1.13726	0.25543	0.726052
hsa-mir-4446_229244	29.7021	-0.467701	0.411339	-1.13702	0.255529	0.726052
hsa-mir-548ax_53186	17.1288	-0.532943	0.469019	-1.13629	0.255833	0.726052
hsa-mir-30a_236326	1449.55	0.246571	0.216998	1.13628	0.25584	0.726052
hsa-mir-194-1_74646	115.548	0.304137	0.268467	1.13287	0.25727	0.72608
AC005263.8-002_230222	154.983	0.272067	0.240157	1.13287	0.25727	0.72608
RNY4-201_197299	1272.2	-0.361117	0.318864	-1.13251	0.257419	0.72608
hsa-mir-130a_236470	107.43	-0.297618	0.262999	-1.13163	0.257789	0.72608
RNY4P7-201_303403	1138.58	1.14486	1.01214	1.13113	0.258002	0.72608
ENST00000364535.1_195788	882.246	1.12979	0.998916	1.13101	0.258049	0.72608
hsa-mir-106b_368694	21.8103	0.566976	0.501468	1.13063	0.25821	0.72608
hsa-mir-21_295217	30705.5	-0.185284	0.163927	-1.13029	0.258356	0.72608
RNY4P7-201_52033	858.177	1.12308	0.995132	1.12857	0.259077	0.72608
hsa-mir-29b-2_167309	58.6437	0.395892	0.350947	1.12807	0.259291	0.72608
RP13-554M15.1-001_145841	65.0023	0.916843	0.813073	1.12763	0.259478	0.72608
hsa-mir-335_199012	34.7048	0.427372	0.37903	1.12754	0.259514	0.72608
hsa-mir-151a_264735	32.3927	-0.462231	0.41008	-1.12717	0.259669	0.72608
hsa-mir-26b_185583	548.972	-0.221578	0.196611	-1.12699	0.259747	0.72608
hsa-mir-30c-2_158525	5591.17	-0.202518	0.179707	-1.12694	0.25977	0.72608
hsa-mir-324_216570	82.0405	-0.326786	0.2902	-1.12607	0.260136	0.72608
hsa-mir-146a_182886	113.723	-0.237058	0.21057	-1.12579	0.260254	0.72608
hsa-mir-486-2_17436	25.0967	0.497754	0.442146	1.12577	0.260264	0.72608
hsa-let-7b_374171	15.6183	-0.631176	0.560803	-1.12549	0.260382	0.72608
RNY4-201_223592	22.3748	-0.803013	0.713819	-1.12495	0.260609	0.72608
RP11-192K2.3-014_185407	103.687	0.774798	0.688809	1.12484	0.260658	0.72608
hsa-mir-374a_275759	267.273	-0.445659	0.396368	-1.12436	0.260862	0.72608
ENST00000387377.1_167378	37.7509	0.928035	0.825486	1.12423	0.260916	0.72608
RNY4P23-201_122731	14.2421	-0.633792	0.563789	-1.12417	0.260943	0.72608
hsa-mir-21_242815	23.892	-0.486652	0.432916	-1.12413	0.26096	0.72608
hsa-mir-16-2_327064	94.8099	0.266036	0.236876	1.1231	0.261395	0.72608
ENST00000387372.1_64675	61.1504	0.799943	0.712272	1.12309	0.261401	0.72608
hsa-mir-181b-2_22160	33.1726	-0.504099	0.449332	-1.12189	0.261911	0.72608
RP11-215L17.2-001_64654	33.4848	0.459203	0.409339	1.12182	0.26194	0.72608
hsa-mir-101-1_262406	152.187	0.339723	0.302931	1.12145	0.262095	0.72608
RP11-846F4.3-001_108561	127.137	0.315519	0.281409	1.12121	0.262198	0.72608
hsa-mir-146a_387114	347.759	-0.200673	0.179074	-1.12061	0.262452	0.72608
hsa-let-7i_129742	13.8199	-0.368221	0.328654	-1.12039	0.262548	0.72608
hsa-mir-30d_6164	37.398	-0.276738	0.247063	-1.12011	0.262666	0.72608
AC090260.5-001_277036	27.8677	-0.544798	0.486753	-1.11925	0.263034	0.72608
hsa-mir-150_84914	8345.47	0.37406	0.33429	1.11897	0.263154	0.72608
RNY4P7-201_382053	472.418	1.07768	0.963838	1.11811	0.26352	0.72608
hsa-mir-92a-2_184400	80.9633	-0.33957	0.303875	-1.11747	0.263795	0.72608
hsa-mir-744_122984	1000.24	-0.205896	0.184272	-1.11735	0.263845	0.72608
RNY3-201_209697	65.0018	-0.325525	0.291429	-1.11699	0.263997	0.72608
hsa-mir-345_48371	59.0292	0.366563	0.328214	1.11684	0.264063	0.72608
hsa_piR_009295|gb|DQ582567|Homo_sapiens_158852	63.7711	-1.08959	0.975788	-1.11662	0.264155	0.72608
hsa-mir-625_364839	133.281	-0.323473	0.289821	-1.11611	0.264374	0.72608
ENST00000631292.1_129509	45.7319	-0.641598	0.574886	-1.11604	0.264403	0.72608
RNY4P10-201_245217	38.6103	0.903175	0.809422	1.11583	0.264496	0.72608
ENST00000387441.1_351126	20.0403	-0.904708	0.811054	-1.11547	0.264648	0.72608
RNY4-201_108850	14.7909	-0.802626	0.719753	-1.11514	0.26479	0.72608
hsa-mir-20a_296959	22.6956	0.498843	0.447602	1.11448	0.265074	0.726337
hsa-mir-28_364878	10.7646	-0.634888	0.570474	-1.11291	0.265746	0.727244
RNY4P10-201_33657	366.684	1.07383	0.964965	1.11282	0.265786	0.727244
RNY4P10-201_102442	47.1471	0.93467	0.840602	1.11191	0.266179	0.727796
RNY4-201_53290	1014.71	0.324875	0.292425	1.11097	0.266582	0.728378
LA16c-390E6.1-002_22810	34.1958	0.908091	0.818182	1.10989	0.267047	0.728862
RNY4P7-201_72111	317.836	1.04392	0.940746	1.10967	0.267141	0.728862
hsa-mir-204_150656	15.0728	0.591219	0.533285	1.10864	0.267587	0.729202
hsa-mir-155_58638	20.6839	0.481367	0.434253	1.1085	0.267648	0.729202
hsa-mir-495_159138	13.8	-0.644042	0.582225	-1.10617	0.268652	0.730946
hsa-mir-106a_275306	32.5447	-0.353864	0.319912	-1.10613	0.268671	0.730946
hsa-mir-320a_243630	17.5303	-0.552587	0.499917	-1.10536	0.269004	0.731332
hsa-mir-26b_166478	26.5705	0.407558	0.368874	1.10487	0.269215	0.731384
hsa-mir-25_262760	20.3963	0.410439	0.371774	1.104	0.269592	0.731888
hsa_piR_016659|gb|DQ592932|Homo_sapiens_29462	47.3996	-0.447375	0.406181	-1.10142	0.270715	0.734412
hsa-mir-576_255468	35.1819	-0.391252	0.355717	-1.0999	0.271377	0.735622
RP11-846F4.3-001_316474	62.6471	0.384718	0.3499	1.09951	0.271546	0.735622
hsa-mir-342_360573	61.3063	0.296837	0.270253	1.09836	0.272045	0.736452
hsa-mir-409_336534	25.2597	-0.663453	0.605548	-1.09562	0.273243	0.73888
RNY4P10-201_105978	849.514	1.07368	0.980977	1.0945	0.273735	0.73888
RNY4P27-201_47852	39.5651	0.832131	0.760365	1.09438	0.273786	0.73888
hsa-mir-103b-1_225381	14.8246	-0.540586	0.494227	-1.0938	0.274042	0.73888
hsa-mir-99b_125450	644.459	0.2433	0.222453	1.09371	0.274081	0.73888
hsa-let-7f-2_57046	203.218	0.265658	0.242907	1.09366	0.274104	0.73888
hsa-mir-1307_379727	18.9106	0.501757	0.459598	1.09173	0.274952	0.739211
ENST00000387342.1_389070	254.509	0.361502	0.331408	1.09081	0.275357	0.739211
hsa-mir-486-2_260579	12.8648	0.468705	0.429746	1.09066	0.275424	0.739211
hsa-mir-409_54654	301.663	-0.355575	0.326092	-1.09041	0.275532	0.739211
hsa-let-7f-2_305629	20.0815	-0.562556	0.515973	-1.09028	0.275589	0.739211
ENST00000550403.5_127062	23.7393	0.735563	0.674779	1.09008	0.275678	0.739211
hsa-let-7b_242853	2645.88	-0.216663	0.198823	-1.08973	0.275831	0.739211
hsa-mir-140_21101	34.6693	-0.376528	0.345613	-1.08945	0.275955	0.739211
RNY4P7-201_254947	87.5282	0.87775	0.805705	1.08942	0.275969	0.739211
hsa-mir-151a_72807	80.2437	-0.33047	0.303687	-1.08819	0.27651	0.740138
hsa-mir-340_353495	485.189	-0.28443	0.261629	-1.08715	0.27697	0.740852
hsa-mir-329-1_252558	21.9869	-0.533329	0.491108	-1.08597	0.277492	0.741701
hsa-mir-339_309226	19.6068	0.387296	0.356773	1.08555	0.277677	0.741701
hsa-let-7b_170761	78.2307	0.368765	0.340052	1.08444	0.278171	0.742429
hsa_piR_020326|gb|DQ597916|Homo_sapiens_347193	6330.36	1.1379	1.04994	1.08377	0.278465	0.742429
hsa-let-7a-3_30183	13.6112	-0.552195	0.509583	-1.08362	0.278533	0.742429
RP11-846F4.3-001_174940	12.2696	-0.50022	0.462451	-1.08167	0.279399	0.743669
ENST00000363899.1_359601	17.2362	0.575464	0.532342	1.081	0.279696	0.743669
hsa-mir-128-1_227737	89.5883	0.349927	0.323816	1.08064	0.279859	0.743669
hsa-mir-4433a_50904	112.336	0.850257	0.787401	1.07983	0.280219	0.743669
hsa-mir-584_182575	94.339	-0.322536	0.298782	-1.0795	0.280364	0.743669
RNY4P7-201_92770	858.86	1.0754	0.996684	1.07898	0.280597	0.743669
hsa-mir-146a_90097	13.8111	-0.493398	0.457314	-1.0789	0.280631	0.743669
hsa-mir-103b-1_355942	98.2785	-0.401751	0.372458	-1.07865	0.280744	0.743669
hsa-mir-30d_161360	15.4192	0.204294	0.189401	1.07863	0.280751	0.743669
hsa-mir-126_256764	17.8948	-0.518191	0.480737	-1.07791	0.281074	0.744007
RNY4P18-201_67247	18.2273	-0.632224	0.58706	-1.07693	0.28151	0.744646
ENST00000464816.1_330848	95.9309	0.78947	0.733939	1.07566	0.282078	0.74552
hsa-mir-222_276581	15.288	-0.49148	0.457054	-1.07532	0.282231	0.74552
ENST00000445125.2_114891	89.8002	0.679055	0.632487	1.07363	0.28299	0.746632
RNY4P16-201_92521	544.598	0.356435	0.332041	1.07347	0.283061	0.746632
hsa-mir-26a-2_192194	51.415	-0.447313	0.417398	-1.07167	0.283868	0.746632
hsa-mir-505_317694	33.9133	0.32343	0.301912	1.07128	0.284046	0.746632
hsa-mir-877_306277	33.1298	0.393517	0.367528	1.07072	0.284297	0.746632
RNY4P27-201_93661	23.7675	0.910606	0.850858	1.07022	0.28452	0.746632
hsa-mir-130b_92768	189.441	-0.325668	0.304323	-1.07014	0.284557	0.746632
hsa-mir-590_219351	18.9147	-0.49365	0.461309	-1.07011	0.284571	0.746632
hsa-mir-26b_293809	25016.4	-0.257075	0.240473	-1.06904	0.285053	0.746632
hsa-mir-29a_250659	59.2688	0.338892	0.317056	1.06887	0.285127	0.746632
hsa-mir-432_311807	22.5759	-0.625917	0.585594	-1.06886	0.285134	0.746632
hsa-mir-126_336747	678.544	-0.146409	0.137071	-1.06812	0.285465	0.746632
SMC1A-202_275705	21.3313	0.722791	0.67684	1.06789	0.28557	0.746632
LA16c-390E6.1-002_224316	130.197	0.76561	0.71718	1.06753	0.285733	0.746632
hsa-mir-26a-2_5249	67.3821	-0.202605	0.189837	-1.06726	0.285855	0.746632
RNY4P10-201_306878	1439.66	1.0918	1.02302	1.06724	0.285864	0.746632
hsa-mir-192_306825	15.9364	0.51361	0.481364	1.06699	0.285977	0.746632
hsa-mir-339_387678	63.5941	0.237344	0.222734	1.06559	0.286608	0.747768
RNY4-201_115041	32.3379	-0.829959	0.779678	-1.06449	0.287107	0.747809
hsa-let-7b_124830	14.2118	0.290085	0.272565	1.06428	0.287203	0.747809
hsa-mir-15a_8704	80.8017	-0.386111	0.362876	-1.06403	0.287316	0.747809
ENST00000516950.1_212769	166.955	0.895641	0.841907	1.06382	0.287408	0.747809
hsa-mir-30a_288499	377.286	0.339463	0.319229	1.06338	0.287608	0.74782
RP3-481F12.6-001_296261	725.982	0.272212	0.256195	1.06252	0.288001	0.748333
tRNA-Glu-CTC-1-7_319879	19.5224	-0.534462	0.503879	-1.06069	0.288829	0.749973
RNY4P10-201_134604	1056.26	1.06273	1.0031	1.05944	0.289398	0.7507
hsa-mir-223_15519	24.094	-0.578389	0.546055	-1.05921	0.289502	0.7507
RP3-337O18.1-012_386202	32.6901	0.671562	0.634579	1.05828	0.289928	0.751293
hsa-mir-320a_266752	20.6921	0.376857	0.356398	1.0574	0.290327	0.751529
hsa-mir-26a-2_214755	545.997	-0.218687	0.206852	-1.05722	0.290413	0.751529
hsa-mir-130a_96885	12.6725	-0.511711	0.484349	-1.05649	0.290743	0.751576
hsa-mir-126_165887	30.8674	-0.199922	0.189264	-1.05631	0.290825	0.751576
hsa-mir-181c_21186	112.361	-0.21232	0.201346	-1.0545	0.291654	0.751745
hsa-mir-21_18582	34.0911	-0.296708	0.281407	-1.05437	0.291713	0.751745
RNY4P10-201_240614	314.101	0.993287	0.942383	1.05402	0.291875	0.751745
hsa-mir-3184_124277	796.3	-0.177873	0.168771	-1.05393	0.291916	0.751745
RP11-645N11.2-002_5102	20.502	0.40412	0.383532	1.05368	0.29203	0.751745
hsa-mir-424_64670	35.9667	0.461035	0.437585	1.05359	0.292072	0.751745
hsa-mir-548j_378275	32.1945	0.402862	0.382556	1.05308	0.292305	0.751749
tRNA-Glu-TTC-14-1_249117	26.6871	0.824601	0.783586	1.05234	0.292642	0.751749
hsa-mir-744_344834	209.76	-0.185347	0.176223	-1.05178	0.292901	0.751749
hsa-let-7b_270323	26.8288	0.487827	0.463988	1.05138	0.293086	0.751749
hsa-let-7i_310291	149.092	-0.265161	0.25223	-1.05127	0.293135	0.751749
ENST00000491451.3_58306	45.5734	0.432985	0.412067	1.05076	0.293367	0.751749
hsa-mir-146a_243769	27.2113	0.43912	0.418146	1.05016	0.293645	0.751749
hsa-mir-320a_95611	414.949	0.33762	0.321497	1.05015	0.293649	0.751749
hsa-mir-16-1_272362	141.583	0.290608	0.277245	1.0482	0.294546	0.753539
RNY4P7-201_101468	927.888	1.05134	1.00492	1.04619	0.295473	0.755324
AC106782.9-001_268266	144.588	0.628114	0.601061	1.04501	0.296019	0.755324
hsa-mir-431_86737	443.538	-0.360782	0.345454	-1.04437	0.296315	0.755324
hsa-mir-382_161967	114.372	-0.465356	0.44563	-1.04426	0.296363	0.755324
hsa-mir-223_79240	40.3424	-0.1787	0.171141	-1.04417	0.296407	0.755324
tRNA-Glu-CTC-1-7_132304	68.3051	-0.292083	0.279741	-1.04412	0.296431	0.755324
hsa-mir-25_283449	12.9558	0.30085	0.288574	1.04254	0.297161	0.756681
RNY4P10-201_277894	499.309	0.997654	0.95742	1.04202	0.297401	0.756786
hsa-mir-101-1_58536	40.6579	0.381212	0.365995	1.04158	0.297608	0.756809
hsa-mir-328_70729	14.4739	0.460207	0.442951	1.03896	0.298825	0.759397
hsa-mir-30d_153843	149.167	0.248174	0.239019	1.0383	0.299129	0.759449
hsa-mir-30e_242937	922.236	-0.177549	0.171065	-1.03791	0.299313	0.759449
hsa-mir-151a_140843	39.3455	-0.311914	0.300602	-1.03763	0.299442	0.759449
hsa-mir-223_367280	26.787	-0.350938	0.33845	-1.0369	0.299783	0.759689
[truncated: 2,311 more rows]

## Sheet: MCI vs AD
	baseMean	log2FoldChange	lfcSE	stat	pvalue	padj
[truncated: 3,454 more rows]

## Sheet: control converter to AD
	baseMean	log2FoldChange	lfcSE	stat	pvalue	padj
[truncated: 4,470 more rows]

[truncated: 2 more sheets: control converter to MCI, MCI converter to AD]
