# Supplementary material for: Small RNA Changes in Plasma Have Potential for Early Diagnosis of Alzheimer’s Disease before Symptom Onset
Source: Cells. 2024 Jan 23;13(3):207. doi: 10.3390/cells13030207 (PMC10854972; doi:10.3390/cells13030207)
Supplement: Supplementary file 1 [file cells-13-00207-s001.zip › Supplemental table S5 ELNET metrics and sequences used.xlsx]

## Sheet: control vs PART at autopsy
Mean AUC	0.987
SD AUC	0.227
Mean CV accuracy	0.714
SD CV accuracy	0.248
genes used in model	ENST00000631292.1_19911, hsa-mir-130b_74380, hsa-mir-451b_82148, tRNA-Glu-TTC-14-1_262131, hsa-mir-25_278266, hsa-let-7b_302847

## Sheet: control vs AD
Mean AUC	0.83
SD AUC	0.0612
Mean CV accuracy	0.857
SD CV accuracy	0.106
genes used in model	AL135747.3-003_47627, hsa-mir-345_52205, hsa-let-7f-2_52467, hsa-mir-181b-2_63530, hsa-mir-223_66968, tRNA-Asp-GTC-2-9_87812, hsa-mir-30c-2_109025, hsa-mir-361_132694, hsa-mir-497_149686, RNY4P10-201_152325, hsa-mir-584_194896, hsa-mir-361_201594, hsa-mir-484_202142, ENST00000387461.2_217952, hsa-mir-29a_260983, hsa-mir-584_274588, ENST00000387421.1_285086, hsa-mir-744_344834, hsa-let-7i_347742, …

## Sheet: control vs MCI
Mean AUC	0.81
SD AUC	0.0613
Mean CV accuracy	0.856
SD CV accuracy	0.125
genes used in model	hsa-mir-25_16193, hsa-mir-625_63616, hsa-let-7d_86986, hsa-mir-223_126531, hsa-mir-223_128809, hsa-mir-345_175733, hsa-mir-29c_188400, hsa-mir-451b_300149, hsa-mir-181a-2_338902, hsa-mir-99b_369949, tRNA-Ser-GCT-6-1_373174, hsa-mir-142_235814, hsa-mir-29c_236693, hsa-mir-221_246078, RNY3P2-201_299682

## Sheet: MCI vs AD
Mean AUC	0.934
SD AUC	0.126
Mean CV accuracy	0.873
SD CV accuracy	0.104
genes used in model	hsa-mir-339_648, hsa-mir-101-1_9210, hsa-mir-186_60176, hsa-mir-625_63616, hsa-mir-345_69861, hsa-mir-24-2_99744, hsa-mir-130b_114433, hsa-mir-222_137871, hsa-mir-222_154723, hsa-mir-223_162627, hsa-mir-493_200222, hsa-mir-143_243317, hsa-mir-329-1_252558, hsa-mir-143_256394, hsa-mir-181b-2_329254, hsa-mir-27b_348948, hsa-mir-625_373055, hsa-mir-146b_378183
