# Supplementary material for: Small RNA Changes in Plasma Have Potential for Early Diagnosis of Alzheimer’s Disease before Symptom Onset
Source: Cells. 2024 Jan 23;13(3):207. doi: 10.3390/cells13030207 (PMC10854972; doi:10.3390/cells13030207)
Supplement: Supplementary file 1 [file cells-13-00207-s001.zip › Supplemental table S6 LRM metrics.xlsx]

## Sheet: Sheet1
	Comparison	Algorithm	AUC	AUC SD	Accuracy	Accuracy SD	Transcripts used
	Control vs. AD	LRM (p value)	0.69	0.09	0.65	0.0903	10 (8 miRNA, 1 tRNA, 1 misc)
		LRM (abs FC)	0.57	0.07	0.522	0.0839	10 (1 miRNA, 1 piRNA, 5 YRNA, 3 misc.)
	Control vs. MCI	LRM (p value)	0.65	0.12	0.64	0.116	10 (2 miRNA, 7 YRNA, 1 piRNA)
		LRM (abs FC)	0.6	0.1	0.633	0.0915	10 (2 miRNA, 2 piRNA, 3 YRNA, 3 misc.)
	MCI vs AD	LRM (p value)	0.57	0.07	0.522	0.0804	10 (7 miRNA, 1 piRNA, 2 misc.)
		LRM (abs FC)	0.6	0.11	0.609	0.1241	10 (3 miRNA, 5 YRNA, 2 misc)
