# Supplementary material for: Small RNA Changes in Plasma Have Potential for Early Diagnosis of Alzheimer’s Disease before Symptom Onset
Source: Cells. 2024 Jan 23;13(3):207. doi: 10.3390/cells13030207 (PMC10854972; doi:10.3390/cells13030207)
Supplement: Supplementary file 1 [file cells-13-00207-s001.zip › Supplemental table S7 Linear regression converters.xlsx]

## Sheet: control converters to MCI
gene	slope	r-squared	p-value
RNY3-201_263120	-19.0818	0.8519	0.0004
RNY3-201_330467	-23.1688	0.8322	0.0006
hsa-mir-766_9747	4.461	0.8203	0.0008
hsa-mir-140_194149	-5.3286	0.7897	0.0014
RNY4P18-201_339557	-18.0618	0.7808	0.0016
RNY3-201_304933	-43.0468	0.7805	0.0016
hsa-let-7e_138736	-24.6667	0.772	0.0018
ENST00000416946.1_272024	-103.836	0.7682	0.0019
hsa-mir-486-2_78120	30.3451	0.767	0.002
ENST00000631292.1_200542	-54.3264	0.7643	0.002
hsa-mir-155_280158	15.9431	0.7634	0.0021
RNY3-201_76128	-29.2751	0.7538	0.0024
hsa-let-7a-1_143357	3.0857	0.7521	0.0025
ENST00000469309.1_221412	-27.8263	0.7514	0.0025
RNY4-201_288334	-7.0722	0.7476	0.0026
hsa-mir-342_74532	-21.53	0.7475	0.0026
ENST00000416946.1_2607	-200.317	0.745	0.0027
hsa-mir-320a_135079	-5.2682	0.7402	0.0029
RNY3-201_45944	-100.572	0.7354	0.0031
RP1-179N16.4-001_379289	-29.6528	0.7353	0.0031
ENST00000362330.2_41385	-7.9716	0.7336	0.0032
hsa-mir-483_4669	-22.045	0.7331	0.0032
RNY4P10-201_380206	-223.277	0.7329	0.0032
RNY4-201_373203	-17.7899	0.7326	0.0032
RNY3P2-201_269549	-25.2092	0.7246	0.0036
ENST00000445125.2_314540	-14.0345	0.7241	0.0036
hsa-mir-425_286911	-10.2763	0.7237	0.0036
RNY4-201_337516	-7.4599	0.7233	0.0037
ENST00000631292.1_378204	-21.3985	0.7219	0.0037
tRNA-Asp-GTC-3-1_187865	-20.2338	0.7196	0.0038
ENST00000416946.1_138916	-115.749	0.717	0.004
hsa-mir-125a_103710	-233.005	0.7143	0.0041
RNY4P10-201_384817	-72.3091	0.71	0.0044
tRNA-Glu-CTC-1-7_132304	2.1199	0.7095	0.0044
hsa-mir-103b-1_272020	32.5769	0.707	0.0045
hsa-mir-151a_255688	-11.3708	0.7063	0.0046
hsa-mir-769_4906	-10.9941	0.7058	0.0046
ENST00000363171.1_359605	-15.9072	0.7021	0.0048
hsa-mir-99a_351109	-18.1295	0.6985	0.005
hsa-mir-22_17192	-11.0178	0.6976	0.0051
RNY3-201_352819	-13.033	0.6969	0.0051
hsa-mir-150_243138	-5.2431	0.696	0.0052
RNY3-201_225597	-45.308	0.6935	0.0053
hsa-mir-483_133260	-25.0269	0.6932	0.0053
ENST00000554988.1_21051	-9.7281	0.6923	0.0054
RNY4P7-201_199405	-40.1958	0.6901	0.0055
RNY4P10-201_211782	-14.3166	0.6848	0.0059
ENST00000572227.1_77856	-14.3584	0.6847	0.0059
RNY3P2-201_132129	-26.862	0.6836	0.006
hsa-mir-139_97503	6.8481	0.6807	0.0062
RNY4P37-201_225888	-13.0183	0.6801	0.0062
hsa-mir-454_389155	3.6343	0.678	0.0064
ENST00000387459.1_27271	-47.3326	0.6771	0.0064
tRNA-Gly-CCC-1-1_224496	-7.0131	0.6757	0.0066
RNY4P27-201_309238	-10.5215	0.6753	0.0066
ENST00000550403.5_127062	-10.1613	0.6739	0.0067
ENST00000387342.1_91615	-159.935	0.6735	0.0067
ENST00000387459.1_67257	-85.6213	0.6701	0.007
RNY4P10-201_383018	-124.488	0.6687	0.0071
tRNA-Asp-GTC-3-1_166656	-30.0777	0.6653	0.0074
RNY3-201_140809	-216.952	0.665	0.0074
ENST00000631292.1_117574	-27.7571	0.6641	0.0075
RNY4-201_333477	-12.0408	0.6625	0.0076
hsa-mir-181b-2_14972	-4.6362	0.6624	0.0076
RNY4P10-201_323683	-90.987	0.6618	0.0076
RNY4P10-201_380951	-30.2905	0.6618	0.0076
RNY3P2-201_75812	-80.8838	0.6611	0.0077
RNY4P10-201_181448	-73.925	0.6604	0.0078
SMC1A-202_29474	-17.4497	0.6515	0.0085
tRNA-Glu-TTC-2-2_324784	-76.0391	0.6514	0.0085
RNY3-201_209697	-22.2135	0.6507	0.0086
RNY4P10-201_84308	-114.444	0.6492	0.0088
hsa-mir-181b-2_79402	-10.9417	0.6479	0.0089
ENST00000445125.2_114891	-55.7725	0.6463	0.009
RP11-177A2.2-001_363487	-15.6987	0.6436	0.0093
RNY4P7-201_163622	-63.4483	0.6433	0.0093
RNY4-201_333488	-15.9298	0.6424	0.0094
hsa-let-7f-2_290723	4.3163	0.6421	0.0094
RNY4P10-201_278129	-71.3964	0.6414	0.0095
RNY4-201_197299	-310.785	0.6393	0.0097
ENST00000387459.1_275461	-194.47	0.6382	0.0098
ENST00000464816.1_274889	-7.6617	0.6359	0.01
RNY4-201_172354	-20.1654	0.6355	0.0101
tRNA-Asp-GTC-3-1_368963	-4.5158	0.631	0.0105
ENST00000631292.1_241831	-33.6817	0.6253	0.0112
tRNA-Gly-TCC-3-1_7078	-15.011	0.6247	0.0112
ENST00000387459.1_157064	-77.0416	0.624	0.0113
hsa-mir-339_123896	-10.9835	0.6228	0.0114
RNY4P10-201_130916	-92.9258	0.6227	0.0115
hsa-mir-27b_309462	-5.3744	0.6222	0.0115
hsa-mir-151a_58321	-18.7356	0.6208	0.0117
ENST00000387342.1_380800	-433.198	0.6182	0.012
ENST00000387342.1_155659	-172.308	0.6181	0.012
hsa-mir-28_182090	-31.8384	0.6161	0.0122
RNY4-201_28823	-8.7909	0.6144	0.0124
RNY4P7-201_130287	-3.2408	0.6143	0.0124
hsa-mir-320a_387067	-57.9407	0.6134	0.0125
RNY3P2-201_299682	-43.5931	0.611	0.0128
RNY4P20-201_264772	-10.0863	0.6086	0.0131
ENST00000362765.1_74722	-5.5473	0.6081	0.0132
RP11-192K2.3-014_185407	-79.0655	0.6076	0.0133
RNY4P7-201_107132	-32.2628	0.6072	0.0133
hsa-let-7a-3_141075	5.8377	0.6072	0.0133
ENST00000445125.2_177795	-13.1257	0.6039	0.0137
hsa-mir-574_357625	-14.4143	0.6005	0.0142
hsa-mir-16-2_169027	3.837	0.6001	0.0142
ENST00000387377.1_328845	-15.6045	0.5987	0.0144
LA16c-390E6.1-002_325716	-11.7985	0.5982	0.0145
RNY4-201_88686	-11.8949	0.5978	0.0145
ENST00000416946.1_362172	-233.456	0.5975	0.0146
ENST00000445125.2_247065	-26.0935	0.5968	0.0147
hsa-mir-16-1_192231	6375.49	0.5949	0.0149
ENST00000387421.1_58892	-10.886	0.5937	0.0151
ENST00000469309.1_209679	-23.9806	0.5937	0.0151
hsa-mir-151a_105895	-5.6467	0.5924	0.0153
RNY4P27-201_245701	-92.6966	0.5911	0.0155
hsa-mir-16-1_227523	2.2224	0.5903	0.0156
hsa-mir-140_331434	8.3989	0.5901	0.0156
RNY4P10-201_105978	-127.645	0.5887	0.0158
RNY4P20-201_232000	-3.2056	0.5873	0.016
RNY4P10-201_97844	-90.3447	0.5855	0.0163
hsa-mir-133a-2_206057	-9.9031	0.584	0.0165
hsa-mir-126_74195	2.3277	0.5833	0.0166
ENST00000445125.2_21091	-3.7208	0.583	0.0167
RNY4P10-201_76417	-8.5501	0.5799	0.0171
RP11-317N8.1-001_201908	-8.941	0.5796	0.0172
hsa-mir-21_118279	3.9173	0.5781	0.0174
AC090260.5-001_277036	-14.8104	0.5775	0.0175
hsa-mir-12136_286251	-36.6791	0.5764	0.0177
ENST00000467525.5_81295	-45.7411	0.5757	0.0178
RNY1-201_67369	-14.9175	0.5751	0.0179
tRNA-Val-CAC-2-1_181688	-9.8047	0.5735	0.0181
hsa-let-7g_253580	6.1516	0.5724	0.0183
RNY4P23-201_12592	-146.441	0.5682	0.019
RNY4P27-201_302406	-6.1571	0.5674	0.0191
RNY4-201_77586	-23.6079	0.5663	0.0193
hsa-mir-320a_95611	-153.725	0.5659	0.0194
RNY3-201_379743	-15.263	0.5639	0.0197
hsa-let-7d_98492	4.0442	0.5622	0.02
hsa-mir-93_87314	303.145	0.562	0.02
hsa-mir-16-2_23043	8.4701	0.5612	0.0202
RNY3-201_227725	-6.4032	0.5597	0.0204
RNY4P7-201_221643	-5.0628	0.5594	0.0205
hsa-mir-199a-1_294225	6.2855	0.559	0.0206
hsa-let-7a-1_387424	4.0491	0.5588	0.0206
hsa-mir-4433a_240937	-62.565	0.5582	0.0207
RNY3-201_253702	-9.108	0.5562	0.0211
RNY3P2-201_327755	-20.6307	0.5554	0.0212
hsa-mir-28_321994	-31.2145	0.5553	0.0212
hsa-mir-16-2_201841	7.5402	0.5528	0.0217
RNY4P10-201_211476	-5.3041	0.5524	0.0217
hsa-mir-335_305724	33.1103	0.55	0.0222
tRNA-Leu-TAG-1-1_264928	-4.7112	0.5484	0.0225
hsa-mir-12136_347580	-19.9819	0.5473	0.0227
hsa-let-7e_247600	-7.0038	0.5472	0.0227
tRNA-Val-CAC-3-1_270892	-15.2984	0.5469	0.0228
ENST00000387441.1_35244	-9.5059	0.5463	0.0229
RNY4P7-201_188571	-5.4249	0.5455	0.023
RNY4P10-201_315910	-52.9232	0.5454	0.0231
AC139452.3-001_166184	-5.3267	0.5447	0.0232
hsa-mir-320a_295453	-5.8335	0.5423	0.0237
hsa-let-7a-1_337648	18.575	0.5422	0.0237
RNY4P10-201_159645	-5.1667	0.542	0.0237
RP11-823O21.1-005_271090	-25.4585	0.5419	0.0237
hsa-mir-378a_152632	-20.7887	0.5412	0.0239
RNY4P10-201_160572	-50.6793	0.5399	0.0241
RP11-192K2.3-014_277388	-19.3821	0.5396	0.0242
RNY4P10-201_251572	-5.5527	0.5395	0.0242
RNY4P27-201_223286	-14.6627	0.5382	0.0245
hsa-mir-328_94436	-9.4247	0.5379	0.0245
hsa-mir-3184_16756	-43.0646	0.5371	0.0247
hsa-mir-92a-1_177768	6.8164	0.5371	0.0247
hsa-mir-99b_233957	-14.2098	0.5353	0.0251
ENST00000410794.1_249080	-74.8404	0.5347	0.0252
hsa-mir-20a_87860	77.582	0.5344	0.0252
hsa-mir-339_377918	-9.4864	0.5296	0.0263
hsa-mir-6819_117370	-9.8283	0.5288	0.0264
RP11-694I15.3-003_251349	-7.6682	0.5279	0.0266
RNY4-201_81829	-15.9832	0.5278	0.0266
RP11-203J14.1-001_88152	-17.7885	0.5274	0.0267
RP11-260H5__B.1-002_63006	-12.173	0.5246	0.0273
RNY4-201_61920	-10.4388	0.5244	0.0274
tRNA-Asp-GTC-3-1_291618	-8.1985	0.5232	0.0276
hsa-mir-145_275045	-10.9966	0.5224	0.0278
hsa-mir-10b_308240	-1.9297	0.5202	0.0283
hsa-mir-493_383039	-16.1941	0.5192	0.0285
RNY4P7-201_373490	-6836.99	0.5188	0.0286
hsa-mir-1307_340977	-19.6822	0.518	0.0288
hsa-mir-30a_148664	-3.8453	0.5174	0.0289
hsa-mir-3184_324039	-16.8249	0.5174	0.0289
RNY4P23-201_300108	-51.1085	0.5164	0.0292
hsa-mir-532_375881	3.8172	0.5141	0.0297
hsa-mir-320a_186451	-9.1549	0.514	0.0297
RNY4-201_269696	-6.6868	0.5138	0.0298
hsa-mir-26b_157161	6.6568	0.5131	0.0299
hsa-mir-125a_298986	-13.0066	0.513	0.03
RP11-203J14.1-001_360705	-8.3519	0.5109	0.0305
hsa-mir-505_257179	-7.9508	0.5108	0.0305
hsa-mir-151a_146455	-19.7885	0.5076	0.0313
ENST00000410794.1_314086	-62.8321	0.5059	0.0317
RNY4-201_156836	-8.9437	0.5049	0.0319
hsa-mir-26b_30622	-3.581	0.5045	0.032
RNY3-201_351027	-88.7905	0.5045	0.032
tRNA-Gly-GCC-1-5_341038	-7.8118	0.5025	0.0325
RNY3-201_255064	-62.4517	0.5022	0.0326
hsa-mir-574_328088	-4.3419	0.5018	0.0327
hsa-mir-127_7702	-30.1378	0.5013	0.0328
hsa-mir-21_299359	2.7141	0.5009	0.0329
hsa-mir-16-1_94708	618.637	0.4995	0.0333
hsa-mir-18a_235875	3.775	0.4995	0.0333
hsa-let-7i_57189	36.0085	0.4991	0.0334
hsa-mir-4433a_297666	-14.9849	0.4988	0.0334
hsa-mir-320a_243093	-20.6268	0.4978	0.0337
RNY4P10-201_21570	-65.4633	0.4972	0.0339
RNY4P10-201_383736	-38.6636	0.4967	0.034
RNY4P23-201_210609	-17.702	0.4959	0.0342
tRNA-Pro-TGG-1-1_330126	-32.481	0.4956	0.0343
hsa-mir-1307_235905	-6.6065	0.4925	0.0351
RNY4P7-201_254947	-23.9335	0.4925	0.0351
hsa-mir-16-1_73952	22.9501	0.4912	0.0355
RNY4P7-201_382053	-64.8827	0.4907	0.0356
hsa-mir-21_295217	1590.42	0.4903	0.0357
hsa-mir-30d_240060	17.8756	0.4896	0.0359
tRNA-Val-CAC-3-1_188680	-14.0266	0.4879	0.0363
hsa-let-7f-2_383755	2.7065	0.4874	0.0365
hsa-mir-126_372981	18.4441	0.4868	0.0366
hsa-mir-21_335809	2.628	0.4864	0.0368
hsa-mir-486-2_159224	8.3082	0.4854	0.037
RNY1-201_82698	-17.63	0.4846	0.0373
RNY4P23-201_118422	-48.4764	0.4843	0.0373
RNY4P24-201_246258	-5.986	0.4835	0.0375
hsa-mir-181a-2_217039	-17.2443	0.4833	0.0376
hsa-mir-16-1_313608	6.8764	0.4828	0.0378
RNY4P20-201_252201	-55.398	0.4824	0.0379
ENST00000387459.1_239055	-82.6964	0.4821	0.038
hsa-mir-941-5_265550	-3.261	0.4816	0.0381
hsa-mir-1307_63212	-60.0175	0.4814	0.0382
hsa-mir-486-2_29847	3.6308	0.4791	0.0388
hsa-mir-425_199790	1.9566	0.4785	0.039
hsa-mir-12136_23534	-35.3047	0.4784	0.039
hsa-mir-181a-2_59539	-12.3852	0.478	0.0391
RNY4-201_81968	-14.7911	0.4778	0.0392
RP11-312N17.3-003_321823	-6.5264	0.4769	0.0395
hsa-mir-223_347976	6.2567	0.4758	0.0398
hsa-mir-378a_187591	-14.0247	0.474	0.0403
RP3-337O18.1-012_150216	-9.2323	0.473	0.0406
tRNA-Gly-CCC-2-2_34564	-19.432	0.4717	0.041
hsa-mir-21_252221	12.039	0.4713	0.0411
hsa-let-7e_335044	-5.8902	0.4701	0.0415
hsa-mir-18a_8080	4.1018	0.4697	0.0416
ENST00000516950.1_212769	-32.5124	0.4679	0.0422
hsa-mir-181b-2_194442	-67.34	0.4678	0.0422
hsa-mir-25_332432	10.6082	0.4674	0.0423
RNY4P10-201_69820	-5.5715	0.4673	0.0423
hsa-mir-21_66709	5.1877	0.4668	0.0425
RNY4P7-201_190326	-22.1371	0.4658	0.0428
RNY4P10-201_140697	-33.1561	0.4657	0.0428
hsa-mir-320a_3961	-3.4575	0.4622	0.0439
RNY4P7-201_248924	-4.1165	0.4607	0.0444
ENST00000516950.1_52656	-64.1891	0.4599	0.0447
hsa-mir-28_200405	-143.332	0.4586	0.0451
RNY3P2-201_59056	-7.8656	0.4585	0.0451
hsa-mir-4433a_268823	-18.9847	0.458	0.0453
RNY3-201_155951	-11.8752	0.4575	0.0454
RNY4-201_201168	-6.2449	0.4572	0.0456
RNY4P27-201_256085	-7.103	0.457	0.0456
hsa-mir-16-2_361359	13.7674	0.4569	0.0456
hsa-mir-425_77676	-9.3235	0.4551	0.0462
hsa-mir-409_288599	-14.7893	0.455	0.0463
hsa-mir-30e_242937	39.5554	0.4545	0.0464
RNY4-201_105298	-50.2923	0.4542	0.0465
RNY4-201_284368	-20.121	0.4537	0.0467
hsa-mir-181a-2_149021	-31.5342	0.4517	0.0474
ENST00000362512.1_178300	-5.7231	0.4516	0.0474
RNY4-201_274963	-63.5046	0.4514	0.0475
RNY4-201_319489	-15.842	0.4505	0.0478
RNY4P7-201_93681	-13.2732	0.4495	0.0481
hsa-mir-320c-1_74673	-28.1111	0.4491	0.0482
tRNA-Asp-GTC-3-1_226378	-3.0534	0.4478	0.0487
hsa-mir-451b_33791	-6.0448	0.4468	0.0491
RNY4P7-201_150818	-4.4817	0.4461	0.0493
RP11-192K2.3-014_72662	-38.0437	0.4439	0.0501
ENST00000445125.2_148529	-16.788	0.4424	0.0506
hsa-mir-320a_47918	-7.2153	0.4423	0.0506
hsa-let-7b_51999	-4.0002	0.4423	0.0506
hsa-let-7f-2_154426	5.533	0.4423	0.0506
hsa-mir-181a-2_219775	-329.706	0.4423	0.0506
hsa-mir-181a-2_373050	-6.9206	0.4415	0.0509
ENST00000445125.2_159455	-7.5347	0.4413	0.051
hsa-mir-126_83940	391.415	0.439	0.0518
hsa-mir-30d_44397	-4.7185	0.4389	0.0518
hsa-mir-1307_175765	-23.9162	0.4375	0.0524
hsa-mir-181a-1_291010	-7.42	0.4375	0.0524
tRNA-Glu-CTC-1-7_317642	-3.408	0.4374	0.0524
hsa-mir-16-2_293401	4.401	0.4363	0.0528
RNY4P10-201_214421	-5.4695	0.4351	0.0532
hsa-mir-146a_292432	-3.0117	0.4345	0.0535
hsa-mir-30a_107952	-19.8112	0.4341	0.0536
RNY4P7-201_87610	-11.1881	0.4335	0.0538
RNY4P10-201_274201	-10.6388	0.4328	0.0541
RNY4P7-201_37487	-2.0264	0.4314	0.0546
hsa-mir-874_329554	-4.8924	0.4309	0.0548
hsa-mir-320c-1_389181	-14.663	0.4299	0.0552
hsa-mir-339_240264	-21.2488	0.4293	0.0554
hsa-mir-21_352952	1.2709	0.4284	0.0558
tRNA-Ser-GCT-6-1_288120	-11.0443	0.428	0.0559
hsa-mir-181a-2_376829	-355.095	0.4276	0.0561
hsa-mir-126_333323	-2.3779	0.4269	0.0563
hsa-mir-12136_58251	-72.0402	0.426	0.0567
RNY4-201_57661	-966.764	0.4256	0.0569
hsa-mir-486-2_386489	3.075	0.4253	0.057
RNY4-201_104396	-111.709	0.4248	0.0571
hsa-mir-16-2_378727	4.7671	0.4244	0.0573
hsa-mir-339_209089	-11.1989	0.4242	0.0574
RNY4P10-201_327329	-5.2457	0.4241	0.0575
hsa-mir-151a_301748	-34.2563	0.4223	0.0581
hsa-mir-574_324721	-20.7255	0.4221	0.0582
hsa-let-7f-2_16319	6.3487	0.4218	0.0583
hsa-mir-181a-2_16363	-54.3625	0.4203	0.0589
hsa-let-7f-2_321301	3022.92	0.4185	0.0597
hsa-mir-181d_122356	-4.6617	0.4183	0.0598
hsa-mir-93_137706	7.6303	0.4182	0.0598
hsa-mir-15a_234346	43.082	0.4171	0.0603
hsa-mir-543_380813	-27.6742	0.4169	0.0603
hsa-mir-15b_150915	134.56	0.416	0.0607
hsa-mir-92a-1_130206	-1.4339	0.4152	0.061
hsa-mir-181d_251117	-5.0008	0.4141	0.0615
hsa-mir-486-2_197874	3.8261	0.414	0.0615
hsa-mir-486-2_251876	5.1539	0.413	0.062
RNY4P23-201_358216	-147.446	0.4129	0.062
hsa-mir-223_300599	-77.9643	0.4126	0.0621
hsa-mir-106b_119634	-4.4262	0.4121	0.0623
tRNA-Leu-CAG-2-2_325725	-5.4499	0.4121	0.0623
hsa-mir-3184_23240	-7.191	0.4116	0.0626
hsa-mir-151a_21345	-24.5837	0.4115	0.0626
hsa-mir-342_285672	-7.3694	0.411	0.0628
hsa-let-7g_252420	1079.73	0.4109	0.0628
hsa-mir-409_234067	-107.619	0.4104	0.063
RNY4P16-201_341055	-5.0033	0.4087	0.0638
hsa-mir-126_159506	57.7978	0.4084	0.0639
hsa-mir-584_72613	-6.3199	0.4081	0.064
hsa-mir-342_304084	-7.0462	0.4074	0.0643
hsa-mir-374a_189382	82.7058	0.4066	0.0647
hsa-mir-92b_353015	14.5037	0.4066	0.0647
RP13-554M15.1-001_37777	-12.4426	0.4059	0.065
hsa-mir-93_248697	-5.7098	0.4059	0.065
hsa-let-7f-2_4260	3.1867	0.4054	0.0652
ENST00000443504.1_2467	-5.6321	0.405	0.0654
RNY4-201_290984	-211.511	0.4048	0.0655
RNY4P20-201_63638	-211.814	0.4047	0.0655
hsa-mir-16-2_235184	28.593	0.4047	0.0655
RNY4P10-201_116497	-49.6472	0.4036	0.066
hsa-mir-1307_289649	-38.287	0.403	0.0662
hsa-mir-28_371107	3.1748	0.4028	0.0664
hsa-mir-28_211008	-8.8843	0.4027	0.0664
tRNA-Gln-CTG-4-2_117108	-6.275	0.4022	0.0666
hsa-let-7a-1_51079	4.1813	0.4021	0.0666
hsa-mir-16-2_122524	15.4409	0.402	0.0667
hsa-let-7f-2_275609	440.72	0.4016	0.0668
hsa-mir-181a-2_327648	-2.9952	0.4015	0.0669
hsa-mir-12136_150999	-3.0961	0.4001	0.0676
RP11-227B21.1-001_363390	-8.5506	0.3997	0.0677
hsa-mir-483_272880	-5.044	0.3995	0.0678
RP11-317N8.1-001_8685	-5.1265	0.3988	0.0681
hsa-mir-3184_183763	-255.642	0.3957	0.0695
hsa-mir-1843_142868	-3.2437	0.3952	0.0697
RNY4P27-201_331569	-2.8753	0.3946	0.0701
tRNA-Glu-TTC-1-2_225755	-3.7084	0.3938	0.0704
hsa-mir-181a-2_357750	-8.6234	0.3933	0.0706
RNY4P10-201_265056	-43.2585	0.3927	0.0709
hsa-mir-21_30286	5.2197	0.3923	0.0711
RNY3P2-201_46167	-23.8077	0.3912	0.0717
hsa-mir-139_149424	-7.2511	0.3908	0.0718
hsa-mir-182_63019	10.5652	0.3907	0.0719
ENST00000384478.1_23036	-8.8079	0.3904	0.072
hsa-let-7c_216273	2.5727	0.3904	0.072
hsa-mir-150_12904	-13.4326	0.39	0.0722
hsa-mir-10399_119030	2.4199	0.3897	0.0723
tRNA-Glu-CTC-1-1_42731	-14.6089	0.3894	0.0725
hsa-mir-320a_51454	-34.4515	0.3888	0.0728
hsa-mir-192_350274	-4.8144	0.3874	0.0734
hsa-mir-500a_380230	-6.6269	0.387	0.0736
RP11-317N8.1-001_286209	-15.3309	0.3865	0.0739
RNY4P10-201_337666	-13.8549	0.3863	0.074
hsa-mir-21_188500	-9.661	0.3861	0.0741
hsa-mir-330_90467	-2.7714	0.385	0.0746
RNY4P10-201_65064	-6.4072	0.3847	0.0748
hsa-mir-223_98661	1.1831	0.3844	0.0749
hsa-mir-16-2_302760	17.2583	0.3837	0.0752
RNY4-201_221171	-21.0201	0.3827	0.0757
tRNA-Pro-TGG-1-1_72407	-6.811	0.3823	0.0759
RNY4P10-201_180660	-7.3305	0.3823	0.0759
RNY4P10-201_203479	-18.5189	0.3809	0.0766
RP11-227B21.1-001_315293	-11.2203	0.3784	0.0779
ENST00000387460.2_88280	-274.122	0.3782	0.078
hsa-let-7i_153894	115.442	0.3771	0.0785
hsa-mir-1307_74442	-20.0063	0.3769	0.0786
RNY4P10-201_242113	-8.6807	0.3767	0.0787
hsa-mir-181a-2_140600	-87.1626	0.3763	0.079
RNY4P16-201_288146	-48.1433	0.3762	0.079
RNY4P18-201_56522	-62.4353	0.3752	0.0795
hsa-mir-3184_161589	-4.9874	0.3746	0.0798
hsa-mir-27b_102749	-5.3521	0.3741	0.0801
RNY4P20-201_191518	-30.7958	0.3741	0.08
hsa-mir-26a-2_132755	1.2274	0.3737	0.0803
RNY4-201_101633	-24.9895	0.3734	0.0804
RNY4P23-201_181378	-3.8075	0.3734	0.0804
hsa-let-7e_20074	-21.4294	0.3717	0.0813
hsa-mir-374c_44845	67.434	0.3711	0.0816
hsa-mir-24-2_307050	-4.8657	0.3708	0.0818
RNY4P10-201_379024	-2.9022	0.3705	0.082
hsa-let-7g_188854	74.5466	0.3702	0.0821
RNY4P10-201_97039	-36.0265	0.3687	0.0829
hsa-let-7f-1_147356	8.892	0.3685	0.083
tRNA-Gly-GCC-1-5_341330	-8.4901	0.3679	0.0833
tRNA-Glu-TTC-2-2_137938	-3.2872	0.3673	0.0836
RNY4P10-201_213191	-9.436	0.3667	0.0839
RNY4P23-201_222243	-411.049	0.3661	0.0843
RNY4-201_300532	-88.0447	0.3657	0.0845
hsa-mir-320a_125173	2.8164	0.3656	0.0845
hsa-mir-181b-1_62802	-8.3208	0.3655	0.0846
RNY4P10-201_306878	-156.186	0.3651	0.0848
hsa-mir-328_386000	-3.0842	0.3651	0.0848
hsa-mir-330_56411	-10.937	0.3644	0.0852
hsa-mir-2355_282122	-5.9229	0.3626	0.0862
RP3-337O18.1-012_386202	-3.2435	0.3622	0.0864
ENST00000540957.1_194067	-4.4737	0.3616	0.0867
hsa-mir-152_243687	5.2715	0.3615	0.0868
RNY4P17-201_255709	-85.058	0.3614	0.0868
RP11-317N8.1-001_101665	-4.807	0.3611	0.087
RP11-694I15.3-001_31551	-3.8384	0.3608	0.0872
hsa-let-7f-2_52467	2.837	0.3607	0.0872
hsa-mir-671_204187	-5.7588	0.3606	0.0873
RNY1-201_94347	-12.5672	0.3603	0.0874
hsa-mir-30e_146175	-5.0464	0.3602	0.0875
RNY4P10-201_364898	-2.9177	0.3599	0.0877
hsa-mir-140_63300	2.9855	0.3597	0.0878
RNY4P10-201_75971	-5.203	0.3597	0.0878
hsa-mir-144_62017	5.3049	0.3592	0.0881
RP11-203J14.1-001_324339	-12.6923	0.3579	0.0888
hsa-mir-744_344834	-14.515	0.3573	0.0891
hsa-mir-425_2973	-20.7972	0.3568	0.0894
hsa-mir-451b_99625	1.1671	0.3555	0.0902
RP13-554M15.1-001_197102	-4.7773	0.3554	0.0902
hsa-mir-23a_305609	-3.2849	0.3546	0.0906
hsa-mir-486-2_250900	2343.43	0.354	0.091
hsa-mir-181b-2_303647	-4.8358	0.3534	0.0913
RNY4P7-201_92770	-106.807	0.3515	0.0925
hsa-mir-16-2_329303	11.8367	0.3508	0.0929
ENST00000410794.1_269771	-10.6689	0.3507	0.0929
hsa-mir-532_215886	-11.5593	0.35	0.0934
hsa-mir-486-2_34632	2.8712	0.3495	0.0936
hsa-mir-199a-1_335914	-9.5685	0.3493	0.0937
hsa-mir-22_284493	-12.4786	0.3489	0.094
hsa-mir-199a-1_132847	8.7428	0.3487	0.0941
hsa-mir-323b_203221	-26.0384	0.3481	0.0945
RNY4P10-201_143853	-7.2961	0.3475	0.0948
RNY4P14-201_105350	-21.2765	0.3472	0.095
ENST00000631292.1_129509	-14.3654	0.3471	0.0951
hsa-mir-148b_329438	-39.0842	0.3463	0.0955
RNY4P27-201_99301	-31.5191	0.346	0.0957
hsa-mir-24-2_246555	-5.8317	0.3458	0.0958
hsa-mir-130a_323698	8.3141	0.3455	0.096
hsa-mir-543_238522	-6.7679	0.3453	0.0961
hsa-mir-320c-1_54530	-4.4943	0.345	0.0963
hsa-mir-744_122984	-115.538	0.345	0.0963
hsa-mir-431_86737	-46.6787	0.3448	0.0964
hsa-mir-425_174220	-79.948	0.3447	0.0965
hsa-mir-652_192221	-10.5925	0.3442	0.0968
ENST00000387342.1_285103	-11.6157	0.3436	0.0972
RNY4P7-201_117626	-5.027	0.343	0.0975
hsa-mir-320b-1_144562	-6.7721	0.343	0.0975
hsa-mir-1908_52801	-27.9591	0.3428	0.0976
hsa-mir-16-1_2996	318.068	0.3415	0.0985
ENST00000387421.1_346221	-18.3514	0.3412	0.0986
RNY4P7-201_167560	-5.3722	0.3406	0.099
RNY4P10-201_188042	-108999	0.3398	0.0995
RP3-481F12.6-001_367811	3.0823	0.3398	0.0995
hsa-mir-30d_143223	549.861	0.339	0.1
hsa-mir-486-2_185380	-21.5739	0.3387	0.1002
tRNA-Gly-GCC-3-1_44715	-3.3872	0.3383	0.1004
RNY4P10-201_75849	-7.3507	0.3381	0.1005
AC012169.1-001_373610	-2.6782	0.3381	0.1006
hsa-mir-22_369735	5.2177	0.3379	0.1007
RNY4P10-201_234633	-37.8095	0.3378	0.1007
hsa-mir-151a_22148	-7.0202	0.3366	0.1015
hsa-mir-16-2_327064	10.4634	0.3356	0.1021
hsa-mir-222_137871	-13.7299	0.3342	0.103
hsa-let-7a-1_247503	10.3238	0.332	0.1044
ENST00000362330.2_229058	-16.3768	0.3319	0.1045
RNY3-201_370067	-10.9844	0.3314	0.1048
hsa-mir-2110_317216	-4.104	0.3312	0.1049
RNY4P10-201_73956	-36.3774	0.3307	0.1052
RP11-215L17.2-001_64654	5.1565	0.3299	0.1058
hsa-mir-3615_88305	2.9055	0.3297	0.1059
hsa-mir-378a_27695	-119.441	0.3295	0.106
hsa-mir-106b_388159	4.4868	0.3292	0.1062
tRNA-Lys-CTT-4-1_124198	-5.2181	0.3286	0.1066
hsa-mir-30d_148735	1.8913	0.3284	0.1067
RNY4-201_58801	-15.0674	0.3275	0.1073
hsa-mir-26b_213301	4.0312	0.3272	0.1075
RNY4P27-201_297265	-25.8085	0.3265	0.108
RNY4P10-201_277894	-53.5613	0.3259	0.1084
tRNA-Glu-CTC-1-7_129216	-7.302	0.3256	0.1086
ENST00000364409.1_338434	-24.8686	0.3256	0.1086
RNY4P10-201_318626	-4.1141	0.3249	0.109
hsa-let-7a-1_119852	5.3475	0.3243	0.1095
hsa-mir-486-2_291585	6.0372	0.3236	0.1099
RNY4P10-201_264609	-1645.97	0.3235	0.11
hsa-mir-15b_63568	10.5436	0.3227	0.1105
ENST00000387342.1_68849	-436.159	0.3221	0.111
hsa-mir-3184_124277	-48.9167	0.3218	0.1112
hsa-let-7b_106573	4.2453	0.3208	0.1118
hsa-let-7i_24180	16.6368	0.3205	0.112
RNY4P16-201_312063	-51.1368	0.3205	0.112
ENST00000445125.2_319383	4.4073	0.3205	0.1121
ENST00000387400.1_242032	-19.8378	0.3196	0.1127
hsa-mir-425_312964	-15.3563	0.3195	0.1128
RP11-694I15.3-003_276365	-4.8797	0.3189	0.1131
RNY4P23-201_198416	-52.2862	0.3187	0.1133
hsa-mir-17_386691	46.1802	0.3186	0.1134
ENST00000410794.1_39082	-17.4658	0.318	0.1138
RNY4P23-201_292258	-20.0333	0.318	0.1138
hsa-mir-339_359493	-4.8595	0.3172	0.1143
hsa-mir-19a_287325	13.0525	0.3169	0.1145
hsa-mir-3184_170600	-4.3247	0.3165	0.1148
hsa-mir-425_160545	-2.9165	0.3151	0.1158
RNY4-201_348771	-5.3515	0.3151	0.1158
hsa-mir-148b_339870	-63.3098	0.3149	0.116
tRNA-Pro-TGG-3-5_19618	-10.2139	0.3142	0.1164
tRNA-Pro-TGG-1-1_321592	-6.4396	0.3136	0.1169
hsa-mir-24-2_271437	1.3271	0.3134	0.117
RNY4P6-201_74125	-5.4114	0.3127	0.1175
hsa-mir-361_17298	42.7653	0.312	0.118
hsa-mir-30a_355731	-3.6562	0.3119	0.1181
hsa-let-7b_239309	-3.4089	0.3115	0.1184
RNY4-201_297400	-6.6649	0.311	0.1187
ENST00000387342.1_202883	-407.319	0.3102	0.1193
hsa-mir-4446_320378	17.4717	0.3102	0.1193
RNY4P7-201_292308	-5.0335	0.3097	0.1197
hsa-mir-425_329176	33.2877	0.3095	0.1198
hsa-mir-339_142965	-15.5535	0.3089	0.1202
hsa-let-7g_46008	87.8187	0.3075	0.1213
hsa-mir-92a-1_119155	4.6952	0.3073	0.1214
tRNA-Pro-TGG-3-1_356299	-19.4557	0.3066	0.1219
hsa-let-7g_337851	1.6406	0.3062	0.1222
hsa-mir-16-1_193171	255.056	0.306	0.1223
RNY1-201_299184	-6.5333	0.306	0.1224
RNY4P18-201_129071	-248.807	0.3045	0.1234
hsa-mir-486-2_327004	233.383	0.3044	0.1236
hsa-mir-98_266892	40.6942	0.3042	0.1237
hsa-mir-486-2_227217	10.6951	0.3039	0.1239
hsa-mir-30d_267147	1.4332	0.3038	0.124
ENST00000387377.1_260706	-8.8768	0.3036	0.1242
hsa-mir-125a_134980	-51.5693	0.3032	0.1245
tRNA-Glu-CTC-1-7_117067	3.4693	0.303	0.1246
hsa-mir-15a_225925	34.8069	0.3018	0.1255
hsa-mir-16-1_100089	131.688	0.3017	0.1256
hsa-mir-320a_364398	5.4381	0.3006	0.1264
RNY4-201_337303	-14.2518	0.3001	0.1268
RNY4P7-201_144760	-2.6543	0.3	0.1269
hsa-mir-103b-1_308939	15.7438	0.2997	0.1271
RNY4P10-201_155456	-1011.34	0.2995	0.1273
RNY4P10-201_106634	-4.9175	0.2991	0.1276
hsa-mir-339_346375	-6.8339	0.2986	0.1279
RNY4-201_688	-7.1666	0.2981	0.1283
RNY4P10-201_49548	-98.1747	0.2978	0.1286
hsa-mir-877_288264	2.4993	0.2977	0.1286
hsa-mir-22_134701	-3.488	0.2974	0.1289
RNY4P14-201_69389	-20.7208	0.2967	0.1294
ENST00000364535.1_174059	-3.5399	0.2951	0.1307
RNY4-201_308824	-3.5198	0.2947	0.131
hsa-mir-3615_27665	2.4965	0.2942	0.1314
tRNA-Pro-TGG-3-5_276596	-14.6043	0.2935	0.1319
tRNA-Glu-TTC-2-2_204834	-5.3916	0.293	0.1323
RNY4P6-201_240315	-3.4974	0.2929	0.1324
RNY4-201_158390	-50.3131	0.2916	0.1334
hsa-mir-326_228954	-24.6224	0.2915	0.1335
hsa-mir-25_286399	-5.9422	0.2912	0.1338
hsa-mir-181a-2_338902	-24.4137	0.2901	0.1346
RNY4P20-201_346412	-13.1639	0.2892	0.1353
RNY1P12-201_48006	-3.8818	0.2891	0.1355
hsa-let-7f-2_298080	140.687	0.2889	0.1356
hsa-let-7b_117482	-1.9824	0.2885	0.1359
hsa-mir-92a-2_328257	1.4689	0.2885	0.1359
RP11-193H5.6-001_377332	15.5669	0.2875	0.1367
RNY1-201_148133	-29.5491	0.2873	0.1369
hsa-let-7e_218969	4.3106	0.2873	0.1369
RNY4P7-201_103854	-16.8144	0.2868	0.1373
ENST00000459091.1_14163	-3.3399	0.2867	0.1373
hsa-mir-92a-1_189169	2.4899	0.2867	0.1373
hsa-mir-320c-1_310012	-7.6275	0.2866	0.1375
hsa-mir-106b_205021	-9.8968	0.2859	0.138
ENST00000390880.2_125502	-9.4489	0.2854	0.1385
hsa-mir-126_365410	-6.0251	0.285	0.1387
RNY3-201_245922	-36.9699	0.2844	0.1393
hsa-let-7a-1_105755	3299.51	0.2841	0.1395
hsa-mir-6741_100105	-6.536	0.2837	0.1399
RNY4P10-201_25196	-2.144	0.2835	0.14
RNY4-201_7917	-7.2851	0.2832	0.1402
hsa-mir-26b_268852	158.805	0.2828	0.1406
ENST00000467525.5_308877	-4.4866	0.2826	0.1407
hsa-let-7a-1_177168	4.5812	0.2823	0.141
ENST00000459091.1_233604	-1.8273	0.2823	0.141
hsa-mir-1307_64895	-3.6341	0.2815	0.1417
hsa-mir-4433a_295984	-15.201	0.2814	0.1418
hsa-mir-10b_113391	-6.7012	0.2806	0.1425
hsa-mir-98_100994	7.673	0.2801	0.1428
hsa-mir-19a_155919	3.5506	0.2798	0.1431
hsa-mir-204_99708	-4.2042	0.2797	0.1432
RNY4P10-201_384185	-107.3	0.2795	0.1434
hsa-let-7g_42084	208.075	0.2793	0.1435
hsa-mir-140_46766	-23.2697	0.2793	0.1435
hsa-mir-425_86678	-213.796	0.279	0.1438
RNY4P10-201_100942	-3.9597	0.2789	0.1439
hsa-mir-26a-2_132631	2.4514	0.2786	0.1442
RNY4-201_140303	-10.909	0.2784	0.1443
hsa-mir-22_251695	3.1419	0.2784	0.1443
hsa-mir-486-2_220203	-10.2812	0.2778	0.1448
RNY4P16-201_282944	-49.6148	0.2776	0.145
hsa-mir-130b_216189	5.3396	0.2773	0.1452
hsa-mir-150_360390	-3.5541	0.2773	0.1453
hsa-mir-29a_250659	7.7034	0.2765	0.1459
RNY4P9-201_368197	-26.2545	0.2755	0.1468
hsa-let-7f-2_298416	3.8504	0.2753	0.147
RNY4-201_36466	-27.3499	0.2751	0.1471
hsa-mir-16-2_377040	3.4209	0.2743	0.1478
hsa-mir-374c_67124	136.405	0.2738	0.1483
hsa-mir-25_196240	4.8915	0.273	0.149
hsa-mir-4286_7544	5.6636	0.2728	0.1492
MT-CO2-201_9976	4.5863	0.2721	0.1497
hsa-mir-92a-1_232082	5.0745	0.2721	0.1498
hsa-mir-409_54713	-105.88	0.2719	0.1499
hsa-mir-486-2_128704	-1.901	0.2718	0.15
hsa-mir-486-2_303074	2.6468	0.2715	0.1503
hsa-mir-378a_343316	-3.9133	0.271	0.1507
hsa-mir-92a-2_151269	2.6316	0.2699	0.1517
hsa-mir-576_84383	15.3756	0.2698	0.1518
RNY1-201_317416	-32.5932	0.2697	0.1519
RNY4P27-201_328392	-40.4753	0.2677	0.1537
hsa-let-7f-2_206938	1.9251	0.2676	0.1538
hsa-let-7b_207446	1.015	0.2672	0.1542
hsa-mir-125b-1_131790	-14.5386	0.267	0.1544
ENST00000362330.2_308024	-10.3347	0.267	0.1544
hsa-mir-92a-1_103397	0.9926	0.2667	0.1547
hsa-mir-486-2_276514	-4.56	0.2659	0.1553
hsa-let-7f-2_114556	8.8828	0.2658	0.1555
hsa-mir-486-2_205817	17.4669	0.2658	0.1555
hsa-mir-576_17179	7.5719	0.2657	0.1555
RNY4P7-201_109511	-6.7623	0.2652	0.156
hsa-mir-487b_270677	-11.4017	0.2647	0.1565
hsa-mir-484_195889	-6.3034	0.2643	0.1568
RNY4-201_372620	-14.5051	0.2639	0.1572
hsa-mir-25_217382	-3.6291	0.2635	0.1576
hsa-mir-487b_379702	-8.8265	0.2634	0.1576
hsa-mir-98_316343	190.411	0.2633	0.1577
hsa-mir-425_146815	3.9489	0.262	0.1589
hsa-mir-30c-2_122405	-5.5077	0.2614	0.1595
hsa-let-7f-2_27881	148.33	0.2612	0.1596
RNY4P18-201_367095	-905.004	0.2609	0.1599
hsa-mir-126_26616	11.4682	0.2608	0.1601
hsa-mir-370_94665	-11.9605	0.2599	0.1609
hsa-mir-320a_54210	-12.5099	0.2598	0.161
RNY4P10-201_314659	-3.6382	0.2598	0.161
hsa-mir-30e_345074	-5.0527	0.2592	0.1616
hsa-mir-199a-1_246823	26.6113	0.2581	0.1626
hsa-let-7f-2_117550	146.227	0.258	0.1627
RNY4P10-201_134488	-187.309	0.258	0.1627
tRNA-Glu-CTC-1-7_316808	-1.4453	0.2578	0.1629
hsa-let-7b_214705	-1.8617	0.2577	0.163
hsa-mir-21_242786	5.1694	0.2576	0.1631
ENST00000387342.1_142606	-2.8844	0.2574	0.1632
hsa-mir-222_250888	-4.741	0.2574	0.1633
RNY4P27-201_173847	-30.8038	0.2562	0.1644
RNY4P10-201_149024	-7.1144	0.2559	0.1647
hsa-mir-486-2_256116	3.3986	0.2557	0.1649
hsa-mir-195_3764	4.5443	0.255	0.1655
hsa-mir-148a_279234	-7.4797	0.2549	0.1657
tRNA-Glu-CTC-1-7_315034	-469.668	0.2539	0.1666
hsa-mir-151a_380855	-24.0825	0.2535	0.1671
RP11-317N8.1-001_181822	-13.9562	0.2527	0.1678
hsa-mir-26a-2_158714	255.242	0.2521	0.1684
hsa-mir-181a-2_292851	-13.3553	0.2519	0.1686
hsa-let-7b_280725	4.7027	0.2514	0.1691
hsa-mir-140_32850	2.1458	0.2512	0.1693
hsa-let-7a-1_33941	285.76	0.2503	0.1701
hsa-mir-486-2_339588	3.0584	0.2501	0.1704
hsa-mir-142_174090	3.3021	0.2497	0.1708
RNY4P23-201_215724	-4.1579	0.2487	0.1717
RNY4P27-201_388791	-1135.12	0.2485	0.1719
RNY4P10-201_342419	-1.4241	0.2476	0.1729
RNY4P10-201_201208	-58.8668	0.2472	0.1733
hsa-let-7e_213643	-20.8724	0.2469	0.1736
hsa-mir-130a_236470	6.2174	0.2467	0.1738
hsa-mir-3184_355412	-10.126	0.2466	0.1739
hsa-mir-16-1_32936	15.7895	0.2465	0.174
hsa-mir-126_152960	-20.9248	0.2461	0.1743
hsa-mir-374a_181660	13.3771	0.2459	0.1745
RP3-481F12.6-001_924	13.5402	0.2444	0.1762
RNY4P10-201_134604	-124.064	0.2441	0.1764
hsa-mir-146a_342650	-24.557	0.2435	0.1771
hsa-mir-4446_240100	-3.8367	0.2433	0.1772
hsa-mir-92a-1_46137	2226.55	0.2432	0.1774
hsa-mir-320a_8990	-3.4733	0.2416	0.179
hsa-mir-26b_117785	7.4334	0.2411	0.1795
hsa-mir-106b_33071	-2.365	0.2403	0.1803
hsa-mir-320a_117120	-3.184	0.2398	0.1809
hsa-mir-125b-1_6739	-5.6802	0.2393	0.1814
RNY4P20-201_320344	-42.5169	0.2388	0.1819
hsa-let-7b_44366	-8.1951	0.2385	0.1822
hsa-mir-487b_370495	-2.7409	0.2379	0.1829
hsa-mir-196b_10816	4.8217	0.2372	0.1836
hsa-mir-146b_324259	-8.8135	0.237	0.1839
hsa-mir-769_250279	-11.1802	0.2365	0.1843
hsa-let-7c_25130	-5.5738	0.2359	0.185
hsa-mir-629_375926	-4.6941	0.2356	0.1853
hsa-mir-93_145834	41.9757	0.2354	0.1855
hsa-let-7e_217768	-10.0165	0.2354	0.1855
hsa-let-7b_144414	3.3812	0.2351	0.1858
RNY4P10-201_165643	-4.5131	0.2351	0.1859
hsa-mir-92a-2_70875	7.8554	0.235	0.1859
RP13-554M15.1-001_145841	-16.5751	0.235	0.1859
hsa-mir-26a-2_265379	2.6487	0.2349	0.186
hsa-mir-486-2_371957	-5.6405	0.2347	0.1862
RNY4P7-201_52033	-69.3125	0.2343	0.1868
ENST00000445125.2_208216	-30.056	0.2343	0.1867
AC005263.8-002_230222	-17.9718	0.2334	0.1877
ENST00000387347.2_324571	5.8422	0.2331	0.188
hsa-mir-151a_123286	-4.6909	0.2329	0.1883
hsa-mir-654_370409	-54.878	0.2327	0.1884
ENST00000491451.3_58306	-5.9998	0.2324	0.1887
hsa-let-7f-1_231804	5.6892	0.2322	0.189
hsa-mir-32_231011	10.4932	0.2317	0.1896
ENST00000387342.1_222394	-5.2586	0.2308	0.1905
hsa-mir-26b_31153	6.9269	0.2303	0.1911
hsa-mir-532_25486	-6.0181	0.2297	0.1917
RNY4P7-201_133644	-1.5602	0.2296	0.1919
tRNA-Val-CAC-3-1_66062	-22.857	0.2293	0.1922
hsa-mir-128-1_86170	7.3697	0.229	0.1925
hsa-mir-221_290629	6.3158	0.229	0.1925
RNY4-201_105956	-9.2381	0.2284	0.1932
hsa-mir-484_136842	100.356	0.2279	0.1937
RNY4-201_374186	-12.9633	0.2278	0.1939
tRNA-Glu-CTC-1-7_258532	-24.5183	0.2277	0.1939
hsa-mir-92a-1_209241	5.4509	0.2274	0.1943
hsa-let-7a-1_170849	2.4214	0.2272	0.1946
tRNA-Glu-CTC-1-7_102180	5.7678	0.2271	0.1947
RNY4P7-201_72111	-28.3978	0.2269	0.1949
RNY4P7-201_27183	-98.3396	0.2268	0.195
hsa-mir-1307_183568	-21.7536	0.226	0.1959
RNY4P10-201_115365	-2.8453	0.2259	0.196
RNY1P12-201_58926	8.8517	0.2257	0.1963
ENST00000387400.1_327819	3.5727	0.2256	0.1963
tRNA-Glu-CTC-1-1_380005	-3.5978	0.2255	0.1965
RNY4-201_380478	-12.7	0.2254	0.1965
hsa-let-7g_91939	0.8235	0.2253	0.1967
hsa-mir-330_5493	-2.1269	0.2252	0.1968
hsa-mir-1246_231014	-8.3928	0.2251	0.1969
hsa-mir-151a_298040	9.3375	0.2251	0.1969
hsa-mir-425_389306	-38.0607	0.225	0.197
hsa-mir-92a-2_262162	1.2044	0.2247	0.1974
hsa-mir-421_165993	2.0144	0.2237	0.1985
RP3-481F12.6-001_141227	20.7553	0.2234	0.1989
hsa-mir-19b-2_96985	9.1156	0.2233	0.199
hsa-mir-374c_93074	21.6228	0.2224	0.2
RNY4P10-201_164680	-45.9016	0.2217	0.2008
hsa-mir-15b_97617	23.9086	0.2216	0.2009
hsa-mir-766_145862	-7.6915	0.2216	0.2009
hsa-mir-320a_220574	-5.2615	0.219	0.204
hsa-mir-210_93088	3.1293	0.2184	0.2046
RNY4P10-201_227525	-58.3035	0.218	0.2051
RNY4-201_113913	-6.9558	0.2176	0.2056
hsa-mir-486-2_44982	-5.9721	0.2174	0.2058
RNY4P10-201_33657	-28.7323	0.2171	0.2062
RNY4-201_2301	-1763.14	0.2166	0.2067
hsa-mir-744_297711	-45.7497	0.2166	0.2068
hsa-mir-126_192882	28.7081	0.2165	0.2069
hsa-mir-143_256394	-97.6593	0.2159	0.2077
RNY4P10-201_141230	-4.3405	0.2158	0.2078
RNY4P7-201_303403	-81.1819	0.2157	0.2078
hsa-mir-378a_125774	-29.4075	0.2154	0.2083
hsa-mir-1307_342476	-2.5093	0.2154	0.2082
RP3-481F12.6-001_351854	48.8841	0.2153	0.2083
hsa-let-7b_201643	1.1588	0.2152	0.2084
hsa-mir-16-2_35932	2.6677	0.2151	0.2085
hsa-mir-26a-2_44861	2.5988	0.2151	0.2086
RNY4P7-201_79305	-57.729	0.2149	0.2088
hsa-mir-942_151088	-7.942	0.2146	0.2091
RNY4P7-201_101468	-75.2334	0.2136	0.2104
hsa-let-7f-2_386158	6.9111	0.2135	0.2105
hsa-let-7a-1_49271	147.661	0.2134	0.2106
hsa-mir-99b_125450	-59.9935	0.2129	0.2112
hsa-mir-598_108542	-3.1011	0.2123	0.2119
tRNA-Val-CAC-4-1_358366	-45.324	0.2122	0.2121
hsa-let-7d_14272	22.0928	0.2108	0.2138
hsa-mir-25_16193	-2.5447	0.2108	0.2138
tRNA-Pro-TGG-1-1_5340	-2.6283	0.2106	0.2141
hsa-let-7i_106014	5.4483	0.2106	0.214
RNY4-201_95112	-50.1096	0.2103	0.2143
RNY4P18-201_67247	-1.5418	0.2092	0.2157
hsa-mir-23b_75879	-16.3725	0.2091	0.2159
RNY4P10-201_333606	-2.9337	0.209	0.2161
hsa-mir-30d_326166	1.4124	0.2084	0.2168
RNY4P20-201_141149	-43.1593	0.2082	0.217
hsa-mir-29a_328009	4.8825	0.2082	0.217
hsa-mir-186_294232	1.4776	0.2076	0.2178
hsa-mir-374a_275759	14.9634	0.2074	0.2181
hsa-mir-15b_22930	6.1129	0.2073	0.2181
hsa-mir-486-2_274851	-14.4688	0.2073	0.2182
RNY4-201_184749	-95.3191	0.2068	0.2188
hsa-mir-26a-2_101126	3.5537	0.2066	0.219
hsa-mir-16-1_217120	42.2133	0.2065	0.2192
hsa-mir-126_269354	10.982	0.2062	0.2195
hsa-mir-30d_356678	1.9035	0.2058	0.2201
RNY4-201_356479	-49.0011	0.2054	0.2205
hsa-mir-17_141595	6.8016	0.205	0.221
hsa-mir-26b_293809	783.034	0.2045	0.2216
RNY4P10-201_119772	-36.6173	0.2038	0.2226
hsa-mir-382_142810	-2.478	0.2031	0.2234
AC040162.22-012_361196	-6.6657	0.2029	0.2237
hsa-mir-223_297507	3.2285	0.2028	0.2239
RNY4-201_285839	-5.2042	0.2027	0.2239
hsa-mir-4433a_103896	-6.4053	0.2023	0.2245
hsa-mir-222_297526	-4.3961	0.2018	0.2251
hsa-let-7i_52329	4.3479	0.2016	0.2254
hsa-mir-25_164373	739.337	0.2014	0.2256
CTD-2083E4.1-002_54147	2.6236	0.2009	0.2262
RNY4P24-201_145576	-64.0375	0.2006	0.2267
hsa-mir-181a-2_230799	-6.9707	0.2005	0.2268
hsa-let-7b_162540	-8.4723	0.2004	0.227
hsa-mir-486-2_215223	2777.67	0.2004	0.2269
hsa-mir-652_133548	7.315	0.2003	0.2271
hsa-mir-92a-2_34549	1.8452	0.2001	0.2273
RNY1-201_33510	-40.2867	0.1999	0.2275
hsa-mir-330_285466	-5.4898	0.1997	0.2279
RP11-752G15.5-002_70492	15.8954	0.1991	0.2286
hsa-mir-221_98005	7.3417	0.1976	0.2306
tRNA-Glu-CTC-1-1_291569	-5.4691	0.1975	0.2307
hsa-mir-21_329161	-2.3227	0.1973	0.231
ENST00000364535.1_195788	-67.6675	0.1972	0.2312
hsa-mir-12136_155410	-5.6069	0.1968	0.2317
hsa-mir-103b-1_110365	2.7862	0.1964	0.2322
RNY4P10-201_152686	-1.5663	0.1964	0.2322
hsa-mir-16-2_43754	2.964	0.1961	0.2326
hsa-mir-152_98966	-25.3996	0.196	0.2327
RNY4P10-201_314845	-109.69	0.1957	0.2332
ENST00000387342.1_389070	-12.794	0.1955	0.2334
hsa-mir-223_212919	-228.693	0.1951	0.2339
hsa-mir-16-1_297369	9.3815	0.1951	0.2339
hsa-mir-576_15162	3.9939	0.195	0.234
RNY4-201_375325	-12.7954	0.195	0.2341
RNY4P7-201_356826	-1.6113	0.1939	0.2356
hsa-mir-140_225963	-21.5162	0.1936	0.236
hsa-mir-451b_18787	409.427	0.1934	0.2362
RNY4-201_85527	-1360.59	0.1933	0.2364
RNY4P10-201_308539	-61.5261	0.193	0.2368
hsa-mir-20a_153808	2.5273	0.1928	0.2371
RNY4P10-201_374647	-55.3427	0.1927	0.2371
RNY4P10-201_54904	22.1019	0.1922	0.2379
hsa-mir-199a-1_176254	-2.9493	0.1922	0.2378
ENST00000387342.1_369710	-33.9615	0.192	0.2382
RNY4-201_298100	-12.1569	0.1919	0.2382
RNY1-201_320329	15.0312	0.1913	0.2391
hsa-mir-324_216570	-4.6648	0.1907	0.2399
hsa_piR_015249|gb|DQ590830|Homo_sapiens_2062	-7.5704	0.1903	0.2405
hsa_piR_004153|gb|DQ575660|Homo_sapiens_11330	-7.5704	0.1903	0.2405
hsa_piR_020326|gb|DQ597916|Homo_sapiens_29076	-7.5704	0.1903	0.2405
hsa_piR_016659|gb|DQ592932|Homo_sapiens_29462	-7.5704	0.1903	0.2405
hsa_piR_004309|gb|DQ575884|Homo_sapiens_32351	-7.5704	0.1903	0.2405
hsa_piR_000823|gb|DQ571031|Homo_sapiens_37959	-7.5704	0.1903	0.2405
hsa_piR_009295|gb|DQ582567|Homo_sapiens_39807	-7.5704	0.1903	0.2405
hsa_piR_020485|gb|DQ598159|Homo_sapiens_53759	-7.5704	0.1903	0.2405
hsa_piR_020009|gb|DQ597484|Homo_sapiens_83146	-7.5704	0.1903	0.2405
hsa_piR_018570|gb|DQ595536|Homo_sapiens_86916	-7.5704	0.1903	0.2405
hsa_piR_019951|gb|DQ597403|Homo_sapiens_94333	-7.5704	0.1903	0.2405
hsa_piR_015026|gb|DQ590548|Homo_sapiens_100122	-7.5704	0.1903	0.2405
hsa_piR_016658|gb|DQ592931|Homo_sapiens_104908	-7.5704	0.1903	0.2405
hsa_piR_020326|gb|DQ597916|Homo_sapiens_108419	-7.5704	0.1903	0.2405
hsa-mir-223_109940	3.5111	0.1903	0.2405
hsa_piR_001312|gb|DQ571813|Homo_sapiens_117843	-7.5704	0.1903	0.2405
hsa_piR_019420|gb|DQ596670|Homo_sapiens_119128	-7.5704	0.1903	0.2405
hsa_piR_015249|gb|DQ590830|Homo_sapiens_121389	-7.5704	0.1903	0.2405
hsa_piR_020326|gb|DQ597916|Homo_sapiens_127021	-7.5704	0.1903	0.2405
hsa_piR_000291|gb|DQ570344|Homo_sapiens_138454	-7.5704	0.1903	0.2405
hsa_piR_020009|gb|DQ597484|Homo_sapiens_143633	-7.5704	0.1903	0.2405
hsa_piR_020009|gb|DQ597484|Homo_sapiens_150226	-7.5704	0.1903	0.2405
hsa_piR_020326|gb|DQ597916|Homo_sapiens_150614	-7.5704	0.1903	0.2405
hsa_piR_017723|gb|DQ594464|Homo_sapiens_151756	-7.5704	0.1903	0.2405
hsa_piR_020829|gb|DQ598677|Homo_sapiens_152959	-7.5704	0.1903	0.2405
hsa_piR_020009|gb|DQ597484|Homo_sapiens_153774	-7.5704	0.1903	0.2405
hsa_piR_016659|gb|DQ592932|Homo_sapiens_156408	-7.5704	0.1903	0.2405
hsa_piR_000765|gb|DQ570956|Homo_sapiens_161683	-7.5704	0.1903	0.2405
hsa_piR_020009|gb|DQ597484|Homo_sapiens_168662	-7.5704	0.1903	0.2405
RNY4-201_178852	-6.7775	0.1903	0.2405
hsa_piR_009295|gb|DQ582567|Homo_sapiens_187115	-7.5704	0.1903	0.2405
hsa_piR_016659|gb|DQ592932|Homo_sapiens_197917	-7.5704	0.1903	0.2405
hsa_piR_020326|gb|DQ597916|Homo_sapiens_204024	-7.5704	0.1903	0.2405
hsa_piR_017723|gb|DQ594464|Homo_sapiens_204595	-7.5704	0.1903	0.2405
hsa_piR_020326|gb|DQ597916|Homo_sapiens_204722	-7.5704	0.1903	0.2405
hsa_piR_000823|gb|DQ571031|Homo_sapiens_235697	-7.5704	0.1903	0.2405
hsa_piR_018570|gb|DQ595536|Homo_sapiens_236602	-7.5704	0.1903	0.2405
hsa_piR_019914|gb|DQ597347|Homo_sapiens_254916	-7.5704	0.1903	0.2405
hsa_piR_018569|gb|DQ595533|Homo_sapiens_257148	-7.5704	0.1903	0.2405
hsa_piR_019420|gb|DQ596670|Homo_sapiens_261457	-7.5704	0.1903	0.2405
hsa_piR_016677|gb|DQ592953|Homo_sapiens_261659	-7.5704	0.1903	0.2405
hsa_piR_001170|gb|DQ571526|Homo_sapiens_262812	-7.5704	0.1903	0.2405
hsa_piR_016658|gb|DQ592931|Homo_sapiens_265442	-7.5704	0.1903	0.2405
hsa_piR_017716|gb|DQ594453|Homo_sapiens_267354	-7.5704	0.1903	0.2405
hsa_piR_020326|gb|DQ597916|Homo_sapiens_267783	-7.5704	0.1903	0.2405
hsa_piR_016658|gb|DQ592931|Homo_sapiens_267799	-7.5704	0.1903	0.2405
hsa_piR_018570|gb|DQ595536|Homo_sapiens_271091	-7.5704	0.1903	0.2405
hsa_piR_016677|gb|DQ592953|Homo_sapiens_291587	-7.5704	0.1903	0.2405
hsa_piR_016659|gb|DQ592932|Homo_sapiens_309204	-7.5704	0.1903	0.2405
hsa_piR_018570|gb|DQ595536|Homo_sapiens_334497	-7.5704	0.1903	0.2405
hsa_piR_018570|gb|DQ595536|Homo_sapiens_336204	-7.5704	0.1903	0.2405
hsa_piR_020829|gb|DQ598677|Homo_sapiens_342976	-7.5704	0.1903	0.2405
hsa_piR_020326|gb|DQ597916|Homo_sapiens_347193	-7.5704	0.1903	0.2405
hsa_piR_020388|gb|DQ598008|Homo_sapiens_348345	-7.5704	0.1903	0.2405
hsa_piR_016658|gb|DQ592931|Homo_sapiens_355730	-7.5704	0.1903	0.2405
hsa_piR_020009|gb|DQ597484|Homo_sapiens_370042	-7.5704	0.1903	0.2405
hsa_piR_000823|gb|DQ571031|Homo_sapiens_370925	-7.5704	0.1903	0.2405
hsa_piR_020485|gb|DQ598159|Homo_sapiens_374276	-7.5704	0.1903	0.2405
hsa_piR_000765|gb|DQ570956|Homo_sapiens_387018	-7.5704	0.1903	0.2405
hsa_piR_016659|gb|DQ592932|Homo_sapiens_389395	-7.5704	0.1903	0.2405
RNY4P10-201_34150	-72.2571	0.1901	0.2408
hsa-mir-223_66968	1.4381	0.1899	0.241
hsa-mir-24-2_357877	84.765	0.1898	0.2412
hsa-mir-30d_283461	575.817	0.189	0.2422
hsa-mir-132_266196	-2.5796	0.1889	0.2424
hsa-mir-589_353717	3.444	0.1889	0.2424
hsa-mir-199a-1_337750	-45.592	0.1887	0.2427
AC009948.9-022_358343	-3.7367	0.1887	0.2426
hsa-let-7a-1_197117	634.255	0.1886	0.2428
ENST00000387441.1_234844	-9.695	0.1878	0.244
hsa-mir-320a_324113	-5.1082	0.1878	0.244
RNY4-201_167719	-25.586	0.1877	0.2441
hsa-mir-6511b-2_341682	-2.0514	0.1875	0.2444
RP11-18O13.1-004_115585	-19.0433	0.1873	0.2446
RNY4-201_356159	-5.2552	0.1873	0.2447
RP11-645N11.2-002_141411	-2.4205	0.187	0.245
hsa-mir-30e_186936	144.02	0.1868	0.2453
hsa-mir-27a_35857	22.4998	0.1864	0.2459
hsa-mir-222_196596	-6.2799	0.1864	0.2459
hsa-mir-26b_216762	5.0795	0.1859	0.2466
hsa-mir-29a_212590	7.3491	0.1857	0.2469
RNY4P10-201_305685	-132.172	0.1857	0.2469
hsa-mir-340_345456	34.966	0.1854	0.2473
hsa-mir-3184_370712	-3.1667	0.1853	0.2474
hsa-mir-486-2_260369	2.8399	0.1845	0.2486
tRNA-Glu-TTC-2-2_19840	-9.2956	0.1843	0.2489
hsa-let-7a-3_119603	4.4142	0.1843	0.2489
hsa-let-7f-2_140514	13.3289	0.1841	0.2492
hsa-mir-223_125617	81.9468	0.184	0.2493
RNY4-201_53172	-3.4964	0.1839	0.2494
tRNA-Leu-TAG-1-1_361255	-11.9795	0.1839	0.2494
tRNA-Glu-CTC-1-7_41741	4.1588	0.1838	0.2495
RNY4P27-201_363523	-2.942	0.1837	0.2498
RNY4P20-201_226323	-1693.89	0.1832	0.2504
RNY4P10-201_320087	-72.8984	0.183	0.2508
RNY4P20-201_129263	-41503.8	0.1829	0.2509
hsa-mir-320b-1_287521	2.4378	0.1821	0.252
hsa-mir-146b_134051	-6.1448	0.1815	0.2529
hsa-mir-409_276576	-8.4541	0.1815	0.2529
hsa-let-7a-1_86785	33.3646	0.1812	0.2533
hsa-mir-23b_120455	3.9389	0.1811	0.2535
RNY4P10-201_226716	-25.2904	0.1807	0.2541
RNY4P10-201_340947	-1.9586	0.1805	0.2543
hsa-mir-342_304317	-51.8681	0.1803	0.2546
hsa-mir-431_101787	-16.8597	0.1801	0.2549
hsa-mir-16-1_332891	2.5879	0.1798	0.2553
RNY4P18-201_178710	-13050.4	0.1796	0.2557
hsa-let-7a-1_135791	5.0753	0.1795	0.2558
hsa-mir-92a-1_206190	45.1486	0.1795	0.2559
hsa-let-7a-1_88684	235.815	0.1791	0.2564
tRNA-iMet-CAT-1-8_115116	-2.1304	0.1779	0.2582
hsa-mir-584_182575	5.4985	0.1768	0.2598
ENST00000445125.2_375312	-31.9869	0.1768	0.2598
hsa-mir-182_83446	27.1825	0.1767	0.2599
hsa-mir-192_63872	-8.6822	0.1765	0.2603
ENST00000387372.1_326872	3.075	0.1764	0.2604
hsa-let-7a-1_199965	8.7223	0.1762	0.2607
hsa-let-7i_249774	42.4057	0.176	0.2609
RNY4P10-201_159161	-53.9762	0.1755	0.2617
hsa-mir-152_271119	-10.7314	0.1753	0.2621
RNY4P10-201_156655	-4.1861	0.1741	0.2639
RNY4P37-201_222685	-3.4554	0.174	0.264
hsa-mir-221_297165	1.6026	0.1739	0.2641
hsa-mir-185_185577	-2.7834	0.1734	0.2649
hsa-mir-486-2_188471	-3.7315	0.1734	0.2649
hsa-mir-223_285165	12.6677	0.1734	0.265
hsa-mir-409_54654	-24.0092	0.1733	0.265
hsa-mir-26a-2_12921	1988.62	0.1728	0.2658
RNY4P10-201_282509	-68.0671	0.1728	0.2659
ENST00000387372.1_64675	3.6903	0.1725	0.2663
RP11-694I15.3-003_251063	-9.5287	0.1725	0.2663
hsa-mir-146b_206491	-3.3204	0.1718	0.2674
RNY4P10-201_347988	55.1726	0.1718	0.2673
hsa-mir-15a_196342	8.0754	0.1715	0.2679
hsa-mir-486-2_242498	3.8827	0.1711	0.2684
hsa-mir-29a_6172	3.3202	0.1707	0.2691
hsa-mir-181c_148844	-4.0659	0.1705	0.2693
hsa-mir-186_39204	7.357	0.1703	0.2696
hsa-mir-101-1_97704	8.6477	0.1702	0.2698
hsa-mir-101-1_230594	6.6604	0.1702	0.2698
RP13-554M15.1-001_262444	-40.6073	0.1702	0.2698
RP11-752G15.5-002_350775	26.5785	0.1701	0.27
hsa-mir-151a_31103	14.9708	0.1689	0.2718
hsa-let-7i_129910	0.8255	0.1686	0.2724
RNY4P20-201_317772	-1.779	0.1686	0.2723
hsa-mir-3184_116800	-12.2734	0.168	0.2732
hsa-let-7b_106018	-28.3501	0.1679	0.2733
RNY4-201_73466	-6.5814	0.1678	0.2735
hsa-mir-1908_147927	-4.6133	0.1675	0.2741
hsa-let-7a-3_37445	3.5177	0.1674	0.2742
hsa-mir-15a_132948	6.1186	0.1674	0.2742
RP11-752G15.5-002_201172	3.7147	0.1673	0.2744
hsa-mir-484_313722	4.039	0.1671	0.2747
RNY4-201_387734	-17.0692	0.167	0.2749
hsa-mir-3184_59600	-8.9562	0.1667	0.2753
hsa-mir-24-2_137942	2.8489	0.1666	0.2754
hsa-mir-484_49919	4.792	0.1665	0.2757
hsa-let-7f-2_17089	1.4151	0.1656	0.2771
hsa-mir-3620_13629	2.0842	0.1654	0.2774
hsa-mir-92a-1_212023	3.5101	0.1654	0.2773
hsa-mir-26b_227170	128.067	0.1654	0.2774
hsa-mir-486-2_192408	2.8722	0.1652	0.2777
hsa-mir-181a-2_335893	-5.621	0.1648	0.2783
hsa-mir-338_144064	-2.004	0.1645	0.2788
RNY4P7-201_112684	-2.3823	0.1641	0.2794
hsa-mir-505_317694	-3.1081	0.164	0.2797
hsa-mir-3184_15621	-3.7177	0.1638	0.2799
RNY4-201_63083	-10.0772	0.1636	0.2803
AL157871.1-002_388138	-4.6836	0.1636	0.2802
hsa-mir-30d_46731	6.9369	0.1623	0.2824
hsa-mir-30e_75430	-3.6344	0.1623	0.2823
hsa-let-7b_369729	58.0391	0.1621	0.2826
hsa-mir-486-2_146579	3.8065	0.162	0.2828
hsa-mir-425_84590	3.3317	0.1612	0.2841
hsa-mir-221_65081	-3.8314	0.1611	0.2844
hsa-mir-182_301389	6.0489	0.1609	0.2847
hsa-mir-150_5049	-4.3237	0.1606	0.2852
hsa-mir-337_197291	-3.5032	0.1604	0.2855
RNY4-201_326272	-8.8434	0.1604	0.2854
hsa-mir-93_342577	48.1622	0.1602	0.2858
hsa-mir-26a-2_73038	-4.07	0.16	0.2861
hsa-mir-103b-1_355942	-4.6845	0.16	0.286
RP11-846F4.3-001_37208	7.4369	0.1598	0.2864
hsa-mir-146a_182886	-4.8829	0.1596	0.2868
ENST00000362433.1_16593	-10.524	0.1593	0.2873
hsa-mir-486-2_348346	-9.6388	0.1593	0.2873
hsa-mir-4433a_177437	-24.2608	0.159	0.2877
tRNA-Glu-CTC-1-1_35164	-2.511	0.1589	0.2879
RNY4-201_178179	-46.7592	0.1587	0.2882
hsa-mir-320a_220237	8.2514	0.1586	0.2884
hsa-mir-3615_193389	1.6199	0.1578	0.2898
RNY4P10-201_281658	-158.28	0.1575	0.2903
RNY4-201_228386	-14.1174	0.1574	0.2905
RNY4P10-201_50556	-1.3966	0.1572	0.2908
hsa-mir-106b_130288	62.3856	0.1567	0.2916
RNY4P16-201_63661	-16.742	0.1564	0.2922
hsa-mir-20a_386050	6.8511	0.1562	0.2925
RNY4P7-201_3984	-2.5048	0.156	0.2928
LA16c-390E6.1-002_22810	-5.638	0.1559	0.2929
hsa-mir-197_52583	-7.2331	0.1558	0.2931
hsa-mir-223_265602	-5.5665	0.1558	0.2931
hsa-let-7g_98120	2.6322	0.1557	0.2932
RNY4-201_109357	-23.1769	0.1556	0.2934
hsa-let-7i_310291	6.7693	0.1556	0.2934
hsa-mir-320a_377219	-112.294	0.1555	0.2935
RP11-317N8.1-001_13767	-2.1075	0.1554	0.2937
RNY4P10-201_265734	-3.1387	0.1554	0.2937
hsa-mir-451b_95918	1.2639	0.1552	0.2941
hsa-mir-432_168869	-73.4323	0.1546	0.2951
RNY4P10-201_102442	-4.0869	0.1545	0.2954
hsa-mir-3615_252353	-2.338	0.1543	0.2956
hsa-mir-324_302482	-5.2439	0.1543	0.2956
hsa-mir-92a-2_202089	2.4993	0.1541	0.296
hsa-mir-142_55632	2.8226	0.1537	0.2968
RP11-694I15.3-001_326385	-21.8929	0.1534	0.2971
RNY4-201_138200	-6.6683	0.1528	0.2983
hsa-mir-130a_65677	3.0882	0.1527	0.2984
RNY4P7-201_183755	-43.1533	0.1527	0.2984
hsa-mir-320a_84334	-4.2213	0.1524	0.2989
RNY4P3-201_339936	-67.0736	0.1524	0.2989
RNY4P3-201_173158	-2.4248	0.1521	0.2995
RNY4P10-201_263593	-12.0919	0.1521	0.2995
hsa-mir-126_90944	6.2238	0.152	0.2996
hsa-mir-126_238497	-2.4934	0.152	0.2996
RNY4P10-201_299239	-8.0828	0.1514	0.3007
hsa-mir-451b_310112	256.26	0.1513	0.3009
hsa-mir-345_52205	-2.4608	0.1512	0.3011
hsa-mir-26b_254081	5.6352	0.1512	0.3009
hsa-mir-320c-1_243516	-3.8975	0.1509	0.3016
hsa-mir-101-1_108475	36.4575	0.1508	0.3017
RNY4-201_161546	-30.9823	0.1505	0.3022
hsa-mir-664a_114326	-4.2731	0.1503	0.3025
hsa-mir-409_149220	-12.1813	0.1503	0.3025
hsa-let-7g_388387	36.0611	0.1501	0.3029
tRNA-Pro-TGG-1-1_133536	-5.0699	0.15	0.3031
CTC-471J1.6-002_330849	-1.4317	0.1498	0.3034
hsa-mir-92a-1_259425	230.759	0.1495	0.3039
RNY4P27-201_59288	-498.505	0.1494	0.3041
tRNA-Gly-GCC-1-5_83164	-5.8066	0.1491	0.3046
ENST00000445125.2_164974	-2.3289	0.1488	0.3052
hsa-mir-30e_85369	-7.7975	0.1487	0.3054
hsa-mir-10b_323602	-1.9479	0.1487	0.3054
hsa-mir-142_298175	-2.2783	0.1475	0.3075
hsa-let-7f-2_359398	2.5047	0.1473	0.3078
tRNA-Gly-GCC-5-1_184127	-0.9823	0.147	0.3083
hsa-mir-7-1_14493	-5.1213	0.1465	0.3093
hsa-let-7f-2_29186	1.2011	0.146	0.3102
tRNA-Gly-GCC-3-1_247630	-8.8865	0.146	0.3103
hsa-mir-3615_311421	4.6957	0.1458	0.3105
RNY4-201_386322	2.2119	0.1455	0.3111
hsa-mir-181a-2_319304	-136.11	0.145	0.312
hsa-mir-25_166606	2.3202	0.1449	0.3122
RNY4-201_222047	-19.6696	0.1448	0.3124
RP11-215L17.2-001_294643	3.196	0.1445	0.3128
hsa-mir-27a_74623	15.8904	0.1442	0.3134
RNY4-201_377266	-6.8554	0.1441	0.3136
RNY3-201_275050	-41.6237	0.1439	0.3139
hsa-mir-320a_151590	-16.4941	0.1434	0.3149
RNY4P7-201_155690	-1.1844	0.1433	0.3151
hsa-let-7i_251029	363.563	0.1432	0.3153
ENST00000387449.1_91631	-5.0709	0.1431	0.3155
hsa-mir-28_173944	-4.4895	0.1431	0.3155
RP3-337O18.1-012_85170	-4.4843	0.143	0.3156
RNY4P14-201_127365	-14.2585	0.1428	0.316
hsa-mir-107_365784	2.8516	0.1422	0.3172
hsa-mir-26a-2_184666	2.2767	0.1419	0.3177
hsa-mir-324_148421	2.7114	0.1409	0.3194
RP11-694I15.3-003_255096	-26.7291	0.1407	0.3198
hsa-mir-155_385343	4.4395	0.1405	0.3203
hsa-mir-451b_300149	490.49	0.1403	0.3206
RNY4P20-201_199701	-6.5674	0.1402	0.3208
RNY4P27-201_190269	-17.2111	0.14	0.3213
tRNA-Asp-GTC-3-1_269588	-7.9576	0.1399	0.3213
hsa-mir-320a_113874	-94.1321	0.1396	0.3219
hsa-mir-11400_256625	-3.5828	0.1396	0.322
RNY4-201_343320	-4.1797	0.1391	0.323
tRNA-Val-CAC-4-1_369238	-69.4881	0.1391	0.3229
hsa-mir-340_9282	4.8769	0.1388	0.3234
hsa-mir-4433a_228121	-88.3352	0.1386	0.3238
hsa-mir-26b_272964	46.998	0.1383	0.3244
RNY4-201_69490	-124.392	0.138	0.3249
RNY4P7-201_14080	-4.0795	0.1372	0.3265
RNY4-201_332126	-2.1367	0.1366	0.3276
LA16c-390E6.1-002_195126	-4.0044	0.1358	0.3291
tRNA-Glu-CTC-1-7_61701	-1544.37	0.1355	0.3297
hsa-mir-130b_74380	5.5959	0.1348	0.331
hsa-mir-223_119217	2.686	0.1348	0.3311
hsa-mir-101-2_221694	12.0081	0.1347	0.3312
ENST00000387372.1_94503	22.5309	0.1346	0.3313
hsa-mir-24-2_131159	2.1067	0.1346	0.3314
hsa-mir-328_357042	-35.6384	0.1344	0.3319
hsa-mir-24-2_15470	4.5224	0.1343	0.332
hsa-mir-125a_39152	-52.5852	0.1341	0.3324
tRNA-Pro-TGG-1-1_51610	-2.6068	0.1341	0.3323
hsa-mir-106b_27972	3.6954	0.1338	0.333
RNY4P7-201_276271	-35.7481	0.1332	0.3341
RNY4P18-201_358278	-49.6897	0.1326	0.3354
hsa-mir-342_360573	4.9456	0.1325	0.3355
hsa-mir-142_363694	14.2999	0.1325	0.3356
hsa-mir-148a_157203	2.1808	0.1324	0.3357
hsa-mir-324_147235	-2.9747	0.1322	0.3361
hsa-let-7b_291732	1.8687	0.132	0.3365
hsa-mir-342_185001	-7.4244	0.1317	0.337
RNY4P10-201_151847	-30.4658	0.1309	0.3387
RNY4P7-201_92968	-4.0164	0.1308	0.3389
hsa-mir-574_253984	-5.4468	0.1308	0.3388
hsa-let-7g_183744	2.4204	0.1306	0.3394
RNY4P16-201_92521	-33.4321	0.1305	0.3395
hsa-mir-17_151956	6.4385	0.1302	0.3401
hsa-mir-197_323987	2.389	0.1298	0.341
hsa-mir-486-2_346953	5.0483	0.1296	0.3412
RNY4P17-201_203211	-30.2633	0.1288	0.343
RNY1-201_346103	26.1012	0.1288	0.3428
RNY4P20-201_317536	-28.2318	0.1285	0.3435
hsa-mir-1307_375997	-2.053	0.1284	0.3437
hsa-mir-425_44864	-1.7807	0.1282	0.3441
hsa-mir-3184_110948	-38.1544	0.1282	0.3441
RNY4-201_141685	-8.7242	0.1282	0.3441
RNY4-201_172978	-3.3795	0.128	0.3445
RNY4-201_277655	-43.1222	0.128	0.3444
hsa-mir-140_17835	0.9747	0.1277	0.3452
hsa-mir-146b_62721	-4.0848	0.1277	0.3451
RNY4P7-201_49796	-3.2511	0.1276	0.3452
RNY4P7-201_88884	-0.9233	0.1272	0.3461
ENST00000387459.1_354751	-6.7597	0.1269	0.3467
hsa-mir-301a_11813	1.9122	0.1268	0.3468
hsa-mir-484_68837	29.4893	0.1263	0.348
hsa-mir-144_246958	6.8935	0.1263	0.348
hsa-mir-130a_13434	3.8706	0.1259	0.3487
RNY4P10-201_153683	-73.0777	0.1251	0.3504
hsa-mir-320a_336052	-96.8923	0.125	0.3505
tRNA-Glu-CTC-1-1_148191	-1.436	0.1249	0.3508
hsa-mir-146b_354351	32.5927	0.1248	0.3509
RNY4-201_221319	-106.735	0.1247	0.3512
hsa-mir-146a_17405	2.9915	0.1245	0.3517
tRNA-Gly-CCC-1-1_91023	-1.6141	0.1243	0.3521
hsa-let-7c_115512	2.2268	0.124	0.3527
RNY4P20-201_222041	-36.7805	0.124	0.3526
hsa-mir-29a_64735	-1.9377	0.1233	0.3542
hsa-mir-1843_197097	-2.5863	0.1229	0.3549
hsa-let-7b_185161	4.755	0.1225	0.3558
hsa-mir-24-2_159701	289.019	0.1223	0.3561
hsa-mir-221_375633	-1.7316	0.1218	0.3573
hsa-let-7f-2_309796	2.7184	0.1217	0.3575
hsa-mir-1249_351187	-6.3828	0.1217	0.3575
RNY4P16-201_317202	6.1876	0.1214	0.3581
hsa-mir-140_52225	1.8967	0.1213	0.3584
hsa-mir-150_119626	-9.7295	0.1213	0.3583
hsa-mir-30d_241217	218.543	0.1212	0.3585
hsa-mir-30e_273785	7.6184	0.1212	0.3585
AL135747.3-003_47627	1.0248	0.1206	0.3597
hsa-mir-92a-1_157430	126.592	0.1201	0.3609
hsa-mir-26a-2_201231	3.2803	0.12	0.3612
tRNA-Gly-GCC-5-1_150138	-1034.57	0.1198	0.3615
hsa-mir-30c-2_158525	116.788	0.1198	0.3614
hsa-mir-146b_322274	-33.7979	0.1197	0.3617
hsa-mir-221_78341	33.5719	0.1196	0.3619
hsa-mir-30d_341546	0.9013	0.1196	0.3619
hsa-mir-30c-2_322632	15.6483	0.1194	0.3624
hsa-mir-130b_260172	4.5084	0.1193	0.3625
hsa-mir-223_298942	-26.4214	0.1192	0.3629
RNY4P3-201_357292	-1.7964	0.1191	0.363
hsa-mir-99a_293058	-4.5166	0.119	0.3632
hsa-mir-92b_45138	2.8427	0.1186	0.3642
hsa-mir-155_295767	7.7863	0.1185	0.3643
hsa-mir-29a_260983	13.277	0.1184	0.3646
hsa-mir-16-2_323337	7.6379	0.1181	0.3652
hsa-mir-486-2_159889	1.5802	0.118	0.3655
hsa-mir-222_333439	2.2037	0.1179	0.3657
RNY4P10-201_324268	-2.7617	0.1178	0.3659
hsa-mir-140_340239	-25.8349	0.1176	0.3663
hsa-mir-3184_139086	-3.2498	0.1175	0.3665
RNY4-201_374278	-3.4598	0.1175	0.3666
RP3-481F12.6-001_388160	2.1727	0.1167	0.3682
ENST00000445125.2_222815	-12.3571	0.1165	0.3686
RP11-227B21.1-001_47126	-12.0072	0.1164	0.3689
ENST00000387372.1_349538	4.9075	0.1163	0.3691
hsa-mir-199a-1_111165	2.639	0.1161	0.3696
hsa-mir-328_223924	-2.2921	0.1159	0.37
RNY4P10-201_201253	-31.4403	0.1154	0.371
hsa-mir-485_270073	-26.2459	0.1154	0.3712
RNY4P10-201_294896	24.1204	0.1148	0.3725
hsa-mir-26b_15140	-1.4858	0.1147	0.3727
ENST00000387347.2_28342	-4.0828	0.1144	0.3732
tRNA-Gly-GCC-3-1_116303	-5.2139	0.1144	0.3732
hsa-mir-326_18695	2.8868	0.1135	0.3754
hsa-mir-320a_251627	-118.723	0.1135	0.3753
hsa-mir-3184_40887	-36.8772	0.1133	0.3758
ENST00000387459.1_51248	-18.6746	0.1132	0.3759
hsa-mir-24-2_194498	-4.7255	0.1132	0.376
hsa-mir-486-2_20750	-56.9622	0.1131	0.3762
hsa-mir-106b_31535	21.2736	0.1131	0.3762
hsa-mir-223_31837	2.7348	0.1131	0.3763
RP11-184I16.1-001_182041	-3.8552	0.1131	0.3762
RNY4P10-201_32241	-1.3411	0.113	0.3764
hsa-mir-126_269593	12.2468	0.1122	0.3781
hsa-mir-128-1_208597	34.9998	0.1119	0.3788
hsa-mir-140_246794	2.086	0.1117	0.3793
RNY4-201_334670	-887.919	0.1116	0.3795
hsa-mir-26a-2_258584	62.5071	0.1113	0.3804
hsa-mir-20b_167190	1.6617	0.1112	0.3806
RNY4P7-201_181623	-6.1142	0.111	0.381
hsa-mir-146a_140852	-2.8745	0.1103	0.3825
RNY4P20-201_182889	-19.6853	0.1103	0.3826
tRNA-Glu-CTC-1-1_131209	-1.2076	0.1102	0.3827
hsa-mir-223_158608	-77.1067	0.1102	0.3829
hsa-mir-409_336534	-3.0506	0.11	0.3833
hsa-mir-126_269852	2.5775	0.1098	0.3838
RP11-215L17.2-001_19187	7.8557	0.1096	0.3842
hsa-mir-487b_172009	-28.6189	0.1094	0.3847
hsa-mir-151a_215262	-1.5357	0.1094	0.3847
hsa-mir-221_300710	-2.1901	0.1092	0.3852
hsa-mir-451b_295282	900.155	0.109	0.3856
hsa-mir-29c_188400	7.3546	0.1089	0.3859
hsa-mir-26a-2_3021	3.2814	0.1084	0.3869
hsa-mir-1307_62707	-9.0329	0.1082	0.3873
hsa-mir-25_224288	66.6263	0.1079	0.3881
ENST00000387400.1_204453	6.1011	0.1078	0.3883
hsa-mir-22_62933	2.2503	0.1076	0.3888
hsa-mir-221_176407	8.9885	0.1075	0.3889
RNY4P10-201_237039	-1.9938	0.1073	0.3894
hsa-mir-26a-2_163826	-3.9091	0.1071	0.3899
hsa-mir-6511a-4_166495	-2.8343	0.1066	0.3913
hsa-let-7c_226979	6.9267	0.1066	0.3911
RP11-846F4.3-001_108561	7.5289	0.1063	0.3919
hsa-mir-23b_25389	-11.7138	0.1062	0.3921
RNY4-201_188436	-5.6797	0.1062	0.3921
RNY4P20-201_348553	-2.8664	0.1061	0.3924
hsa-mir-151a_204748	5.071	0.106	0.3925
ENST00000387342.1_169593	-9.1252	0.1058	0.3932
hsa-mir-128-1_97513	10.9804	0.1057	0.3932
hsa-mir-191_47694	-1.2813	0.1056	0.3935
hsa-let-7f-2_57046	16.6582	0.1055	0.3938
hsa-mir-12136_260553	-9.3833	0.1051	0.3948
hsa-mir-20a_333730	7.515	0.1051	0.3948
hsa-let-7g_252247	5.3924	0.1049	0.3951
tRNA-Gly-CCC-1-1_99100	-0.9725	0.1047	0.3957
RNY4P10-201_327018	-37.7644	0.1046	0.396
hsa-mir-223_130986	-5.6346	0.1045	0.3961
ENST00000362330.2_271794	-13.165	0.1043	0.3967
RNY4-201_211394	7.7523	0.1038	0.3979
hsa-mir-342_323524	-2.564	0.1038	0.3979
RNY4P7-201_53529	-26.4862	0.1034	0.3988
hsa-mir-28_220485	-2.0828	0.1034	0.3987
hsa-mir-12136_24592	-2.5356	0.1033	0.3991
hsa-mir-486-2_67372	-3.7215	0.1031	0.3995
tRNA-Gly-TCC-3-1_163614	1.858	0.1031	0.3995
hsa-mir-92a-1_194499	5.3205	0.103	0.3997
hsa-mir-340_238362	6.5017	0.1027	0.4006
tRNA-Asp-GTC-2-9_87812	-4.4641	0.1026	0.4007
hsa-mir-92a-1_46180	5.5752	0.1025	0.401
hsa-mir-361_205650	0.8579	0.1024	0.4012
hsa-mir-92a-2_288038	2.7075	0.1024	0.4013
hsa-let-7i_66086	7.9216	0.1023	0.4013
RNY4P7-201_181420	-3.1034	0.1023	0.4015
hsa-mir-126_69651	0.6888	0.1017	0.4028
RNY4P10-201_154025	-122.808	0.1014	0.4037
ENST00000641545.1_323849	-10.4429	0.1014	0.4036
hsa-mir-12136_129496	-1.8834	0.1011	0.4043
hsa-mir-143_243317	-14.571	0.1007	0.4054
hsa-mir-3184_244505	-2.8313	0.1007	0.4053
AC106782.9-001_274526	-26.2869	0.1004	0.4062
hsa-mir-199a-1_192709	9.9702	0.1	0.4071
RNY4-201_369969	-2.7498	0.0999	0.4073
hsa-mir-574_129526	-1.5818	0.0998	0.4076
hsa-let-7f-2_311800	2.328	0.0998	0.4075
ENST00000387342.1_241888	-21.2605	0.0996	0.408
ENST00000459091.1_73258	-1.5486	0.0995	0.4083
RP11-694I15.3-003_330674	-9.0336	0.0995	0.4083
hsa-mir-101-1_9835	2.534	0.0993	0.4088
hsa-let-7b_262166	15.4617	0.099	0.4095
hsa-mir-223_31988	3.6996	0.0989	0.4098
hsa-mir-140_68320	-4.5879	0.0987	0.4104
hsa-mir-30d_362262	-14.9771	0.0987	0.4103
RNY4P20-201_215136	-27.8223	0.0985	0.4107
hsa-mir-126_211738	3.0985	0.0982	0.4117
RP11-694I15.3-001_293575	-8.436	0.0982	0.4116
hsa-mir-223_258447	1.0366	0.0979	0.4123
RNY4P10-201_105738	-1.6522	0.0974	0.4136
ENST00000384478.1_355496	-1.1426	0.097	0.4147
hsa-let-7b_71612	-4.3739	0.0968	0.4151
hsa-mir-26a-2_95803	3.7333	0.0968	0.415
hsa-mir-15b_310857	57.9165	0.0968	0.415
hsa-mir-320a_383011	-14.154	0.0968	0.4151
ENST00000387459.1_158374	-6.3653	0.0967	0.4152
tRNA-Glu-CTC-1-7_176144	-1.6624	0.0965	0.4159
RNY1P12-201_242365	-3.9976	0.0961	0.417
hsa-let-7a-1_245625	12.2138	0.0961	0.417
RP11-694I15.3-001_387798	-20.7039	0.0958	0.4176
hsa-mir-101-1_262406	8.4172	0.0957	0.418
RP11-227B21.1-001_29997	-17.3193	0.0956	0.4183
hsa-mir-150_89184	-3.3111	0.0955	0.4184
hsa-mir-134_84953	-33.49	0.0954	0.4186
hsa-mir-1307_68733	-2.3075	0.0953	0.4189
hsa-mir-486-2_201671	-1.1341	0.095	0.4196
hsa-mir-769_235685	-1.1039	0.0949	0.4199
hsa-mir-21_129437	642.994	0.0945	0.421
hsa-mir-93_260900	6.026	0.0945	0.421
hsa-let-7a-2_25678	-1.703	0.0937	0.4231
ENST00000362433.1_320768	-8.5758	0.0937	0.4231
hsa-mir-223_213	-2.5375	0.0936	0.4234
hsa-mir-942_354687	-1.8232	0.0934	0.4237
RNY4P27-201_107322	-10.7571	0.0932	0.4244
hsa-mir-223_275125	12.376	0.0931	0.4246
hsa-mir-223_367902	-13.4524	0.093	0.425
hsa-mir-505_133611	2.5864	0.0927	0.4256
hsa-mir-484_253213	31.1049	0.0926	0.426
ENST00000515983.1_221877	-7.6205	0.0925	0.4263
hsa-mir-3615_228758	-5.7912	0.0924	0.4265
hsa-let-7d_254033	-2.1896	0.0924	0.4265
RNY4P16-201_260194	-14.2706	0.0924	0.4266
hsa-mir-181a-2_245944	-1.3419	0.0918	0.428
RP3-481F12.6-001_293971	57.3424	0.0918	0.428
hsa-mir-432_6834	-7.5478	0.0916	0.4286
hsa-mir-144_98328	17.3249	0.0916	0.4286
ENST00000567819.1_79652	1.7499	0.0915	0.4289
KB-1615E4.4-002_7468	-3.7592	0.0911	0.4298
hsa-mir-425_374375	-3.7593	0.091	0.4302
hsa-let-7b_317272	-28.4104	0.0905	0.4315
hsa-let-7b_320155	-5.6745	0.0905	0.4315
RNY4-201_133443	-17.3003	0.0904	0.4319
hsa-mir-342_325892	-2.4391	0.0904	0.4317
hsa-mir-548j_244554	-3.6118	0.0903	0.432
ENST00000384478.1_260499	3.0463	0.0903	0.432
ENST00000387372.1_310098	-1.7705	0.0899	0.4331
hsa-mir-151a_132752	28.0898	0.0897	0.4336
hsa-mir-4433a_7331	-3.013	0.0896	0.434
hsa-mir-26a-1_20290	3.386	0.0892	0.435
RNY4-201_309578	-7.233	0.0891	0.4353
hsa-mir-889_361112	5.9109	0.0891	0.4353
hsa-mir-454_227668	2.6351	0.0886	0.4367
RP11-315I20.11-001_367192	-8.0731	0.0878	0.4389
hsa-mir-28_184712	-4.9007	0.0877	0.4391
hsa-mir-26b_16349	2.0673	0.0876	0.4393
hsa-let-7b_315318	1.0234	0.0876	0.4395
hsa-mir-28_65228	2.1308	0.0875	0.4395
hsa-let-7b_208495	-408.325	0.0875	0.4396
hsa-mir-185_279082	-1.7539	0.0872	0.4404
hsa-mir-15b_323026	5.4886	0.0871	0.4408
hsa-mir-10399_128854	-2.5364	0.087	0.441
ENST00000387347.2_231913	-9.2367	0.0868	0.4414
ENST00000387400.1_181210	3.704	0.0865	0.4423
RNY4P18-201_292229	-307.944	0.0863	0.443
hsa-mir-942_95599	6.5946	0.086	0.4439
hsa-mir-21_230757	25.5814	0.086	0.4437
hsa-mir-221_329603	173.817	0.0858	0.4442
hsa-mir-107_332923	1.8937	0.0858	0.4444
hsa-mir-106b_97144	-1.8453	0.0857	0.4447
hsa-mir-24-2_222759	-1.357	0.0857	0.4447
hsa-mir-16-1_83326	2.2314	0.0856	0.4449
tRNA-Glu-TTC-2-2_94060	-1.8749	0.0856	0.4449
hsa-mir-92a-1_70633	-1.9398	0.0852	0.446
hsa-let-7b_174912	-0.9282	0.0852	0.446
hsa-mir-27b_127861	-1.3528	0.0849	0.4469
hsa-mir-182_296622	-2.0037	0.0847	0.4474
hsa-mir-222_340061	-4.7325	0.0847	0.4475
hsa-mir-103b-1_98789	-12.0253	0.0843	0.4484
RP11-317N8.1-001_121095	5.333	0.0841	0.4491
hsa-let-7e_307590	-3.8016	0.0838	0.4499
hsa-mir-143_320961	-70.6342	0.0836	0.4504
hsa-mir-222_360567	2.7634	0.0836	0.4505
hsa-mir-28_82976	-19.2592	0.0835	0.4509
hsa-mir-26b_185583	10.5092	0.0832	0.4517
hsa-mir-32_36600	2.9587	0.083	0.4522
hsa-mir-342_320143	-2.5357	0.083	0.452
hsa-mir-486-2_245656	5.1312	0.0829	0.4525
hsa-mir-222_327846	6.8795	0.0829	0.4526
hsa-let-7b_231475	3.836	0.0828	0.4528
hsa-mir-148a_24725	-5.401	0.0822	0.4546
hsa-mir-140_13827	-3.7075	0.0819	0.4554
hsa-mir-374a_340673	2.3903	0.0816	0.4563
hsa-mir-140_185995	-68.0949	0.0815	0.4564
hsa-mir-155_121977	21.3534	0.0814	0.4568
hsa-mir-26b_200310	1.1913	0.0814	0.4568
RNY4P7-201_301831	-8.2308	0.0814	0.4569
RNY4P10-201_211144	-9.5043	0.0813	0.4571
hsa-mir-625_373055	5.3842	0.0813	0.4571
hsa-mir-486-2_10941	-36.6775	0.0812	0.4573
hsa-mir-126_139186	-2.9045	0.0812	0.4574
hsa-let-7g_59981	0.9869	0.0811	0.4575
hsa-mir-625_364839	9.4145	0.0811	0.4576
hsa-mir-146a_242798	1.3728	0.0809	0.4583
hsa-mir-93_16140	-6.3944	0.0808	0.4586
hsa-mir-486-2_160534	3.8301	0.0808	0.4584
hsa-mir-126_302674	3.6381	0.0807	0.4588
hsa-mir-550b-2_69148	2.9663	0.0805	0.4594
hsa-mir-16-1_88020	2.0576	0.0805	0.4593
hsa-mir-320c-1_167670	-3.2045	0.0805	0.4594
hsa-mir-221_167661	132.322	0.0803	0.4599
hsa-mir-320a_230819	-2.0244	0.0802	0.4604
ENST00000500358.6_27491	-19.1328	0.0801	0.4606
RNY4P7-201_152699	-13.9451	0.0801	0.4606
hsa-mir-136_74608	-2.2623	0.0799	0.4613
ENST00000387377.1_160765	22.5442	0.0799	0.4612
tRNA-Val-CAC-4-1_279091	-3.4574	0.0798	0.4614
hsa-mir-335_331039	15.7404	0.0798	0.4616
hsa-mir-28_73278	9.246	0.0797	0.4617
hsa-mir-125b-1_317477	-3.0053	0.0792	0.4631
hsa-mir-199a-1_116289	3.1071	0.079	0.4637
RNY4P18-201_26347	-2.4535	0.0788	0.4645
RNY4-201_92446	-8.1517	0.0788	0.4645
hsa-mir-26a-2_129175	60.1617	0.0788	0.4645
hsa-mir-151a_176992	2.0863	0.0788	0.4643
hsa-mir-150_182892	-126.366	0.0787	0.4648
hsa-let-7b_124830	0.6487	0.0784	0.4655
RP11-752G15.5-002_330089	5.9699	0.0784	0.4655
hsa-mir-126_263440	0.681	0.0783	0.4657
hsa-let-7c_230503	26.578	0.0779	0.4669
hsa-mir-1246_279549	-4.3502	0.0779	0.4672
hsa-mir-126_312942	7.3853	0.0779	0.4669
hsa-mir-92a-1_171784	1.739	0.0778	0.4675
hsa-mir-4446_229244	-1.5825	0.0777	0.4676
RNY4-201_298786	-6.6332	0.0777	0.4676
RNY4P7-201_322772	-25.1279	0.0777	0.4675
hsa-mir-335_251728	5.124	0.0776	0.468
hsa-mir-103b-1_145429	-18.6106	0.0774	0.4686
hsa-mir-3615_380926	10.3011	0.0774	0.4686
hsa-mir-374c_52659	7.4738	0.0772	0.4692
hsa-mir-6852_280926	2.5599	0.0771	0.4696
hsa-mir-486-2_185235	-9.1206	0.0768	0.4702
hsa-mir-199a-1_135505	1.3014	0.0766	0.4709
hsa-mir-21_150353	379.24	0.0766	0.4711
hsa-mir-194-1_388745	2.1814	0.0763	0.4717
RNY4-201_89224	-227.509	0.0762	0.472
hsa-mir-12136_286426	1.8643	0.0762	0.4721
hsa-mir-92a-2_275239	-2.1957	0.0761	0.4723
hsa-mir-25_2368	5.8113	0.0758	0.4734
ENST00000364535.1_323918	-20.6396	0.0755	0.4742
hsa-mir-93_291517	3.7783	0.0754	0.4745
RP11-315I20.11-001_44448	-9.9346	0.0745	0.4774
hsa-mir-21_221815	1.9968	0.0745	0.4774
hsa-mir-574_313068	-1.7225	0.0745	0.4773
hsa-let-7b_68745	0.8009	0.0743	0.478
hsa-mir-21_106184	0.7203	0.0743	0.4778
RNY4P10-201_214394	-0.9386	0.0743	0.4778
hsa-mir-191_223343	2.0691	0.0743	0.4778
hsa-mir-324_388008	-7.2389	0.0743	0.4779
hsa-let-7i_270119	56.1478	0.0741	0.4785
hsa-mir-30d_52856	2.6159	0.074	0.4789
hsa-mir-30e_78394	11.5083	0.0739	0.4792
hsa-mir-30d_82143	-23.4793	0.0739	0.4792
RNY1-201_102721	-3.0706	0.0739	0.4792
hsa-mir-30b_14850	36.4567	0.0736	0.4801
RNY4P10-201_230460	-14.3422	0.0733	0.4811
RNY4P10-201_328904	-2.3715	0.0728	0.4826
hsa-mir-3615_83212	21.3525	0.0726	0.4832
hsa-mir-103b-1_293752	-3.0772	0.0726	0.4834
ENST00000387459.1_134629	-4.1707	0.0723	0.4843
hsa-mir-320a_133469	-4.408	0.0722	0.4844
hsa-mir-15a_160828	7.5621	0.072	0.4852
RNY4P20-201_357323	2.2722	0.0719	0.4855
hsa-mir-155_141326	7.2937	0.0716	0.4864
hsa-mir-223_150885	1.4038	0.0714	0.4871
ENST00000464816.1_76063	-1.912	0.0713	0.4874
RP11-317N8.1-001_185862	-8.1711	0.0711	0.4878
ENST00000445125.2_172159	-2.7347	0.071	0.4881
RNY4-201_53290	-91.1826	0.0709	0.4886
RNY4-201_167539	-4.262	0.0706	0.4895
hsa-mir-324_274091	-0.8193	0.0704	0.4903
tRNA-Pro-TGG-3-1_19120	-2.6699	0.0702	0.4908
RNY4-201_314055	-29.957	0.0702	0.4909
hsa-mir-26b_197173	21.1474	0.0701	0.4913
hsa-mir-486-2_352405	2.8556	0.0701	0.4913
hsa-mir-12136_281214	-2.6149	0.07	0.4916
RNY4P10-201_100072	-8.5838	0.0696	0.4927
hsa-mir-126_218646	125.201	0.0696	0.4927
hsa-mir-342_290655	-38.0929	0.0696	0.4927
hsa-mir-223_109179	-1.5668	0.0694	0.4934
hsa-mir-155_311817	34.6397	0.0693	0.4938
RNY4P10-201_2951	-24.5627	0.0692	0.4939
hsa-mir-103b-1_314347	-1.1894	0.0691	0.4943
RNY3-201_358120	-3.3974	0.0691	0.4942
hsa-mir-339_246894	-1.7706	0.069	0.4948
hsa-mir-486-2_373964	-0.6927	0.069	0.4946
hsa-mir-19b-2_20559	-0.9991	0.0689	0.4951
hsa-mir-3184_106639	-119.241	0.0685	0.4963
RNY4P28-201_206004	-3.466	0.0685	0.4962
hsa-mir-10527_99884	2.1014	0.0684	0.4968
RNY4-201_223592	1.6415	0.0684	0.4967
hsa-let-7a-1_204893	2.5135	0.0683	0.4971
tRNA-Glu-CTC-1-7_335120	-1.5722	0.0682	0.4972
RNY4-201_261926	-2.1234	0.0681	0.4975
hsa-mir-22_309163	-97.6136	0.0681	0.4977
RP11-469L3.1-001_141876	-7.7537	0.0677	0.4991
hsa-mir-152_178998	1.7491	0.0676	0.4993
hsa-mir-589_201048	1.0094	0.0673	0.5003
RNY4P28-201_177293	-26.4957	0.0672	0.5006
hsa-mir-146a_347776	1.2528	0.0672	0.5006
tRNA-Pro-TGG-1-1_263764	-3.0209	0.067	0.5012
hsa-mir-330_339617	-1.1511	0.067	0.5014
hsa-mir-223_367280	-1.7875	0.067	0.5011
RP11-227B21.1-001_151550	-5.4679	0.0669	0.5017
hsa-mir-146a_192079	-8.9704	0.0666	0.5026
AC015689.1-001_143202	-5.9999	0.0665	0.5031
hsa-mir-326_130773	4.9671	0.0664	0.5034
hsa-mir-143_190018	-7.5791	0.0663	0.5036
hsa-let-7b_94800	-2.2663	0.0662	0.5039
tRNA-Glu-CTC-1-1_8087	-123.68	0.0659	0.5048
hsa-let-7b_139933	-5.5033	0.0659	0.5049
AC004098.3-005_4065	-9.2684	0.0658	0.5051
hsa-mir-3615_162933	4.2688	0.0656	0.506
hsa-mir-425_57677	-1.4088	0.0655	0.5062
hsa-mir-151a_386534	-53.1213	0.0652	0.5072
tRNA-Val-AAC-1-1_226130	-15.6163	0.065	0.5081
RNY4P7-201_106158	-1.9469	0.0649	0.5083
RP11-184I16.1-001_329352	-3.1283	0.0649	0.5082
hsa-mir-223_12237	-22.3741	0.0648	0.5087
hsa-mir-628_308985	-1.1935	0.0644	0.5101
hsa-mir-942_3568	2.3087	0.0643	0.5104
hsa-mir-181d_35369	-1.2808	0.0642	0.5106
hsa-mir-328_89631	-10.5181	0.0642	0.5108
hsa-mir-26b_16105	4.9014	0.0641	0.5111
hsa-mir-328_99580	-6.0786	0.0641	0.5111
hsa-mir-26b_190519	29.5892	0.064	0.5113
hsa-mir-29a_103402	2.9876	0.0637	0.5122
hsa-mir-199a-1_215076	-10.8459	0.0634	0.5133
hsa-mir-134_379530	-4.1753	0.0634	0.5132
hsa-mir-10b_82231	3.9021	0.0629	0.5153
RNY4-201_361918	-1.0724	0.0629	0.5152
hsa-mir-221_251346	59.2928	0.0628	0.5153
hsa-mir-142_275800	2.2736	0.0628	0.5153
RNY4P7-201_356153	-7.3855	0.0628	0.5155
hsa-mir-625_63616	2.5198	0.0627	0.5158
hsa-mir-486-2_50017	2.3192	0.0622	0.5176
RNY4P10-201_226502	-3.3178	0.0618	0.519
hsa-mir-26a-2_5249	2.0671	0.0617	0.5194
RP11-227B21.1-001_11953	-6.0025	0.0616	0.5196
hsa-mir-148b_281631	-3.8357	0.0614	0.5202
hsa-mir-101-1_15041	2.0512	0.0609	0.5221
hsa-mir-181b-2_35237	0.8802	0.0609	0.5221
hsa-mir-92a-2_184400	3.57	0.0609	0.5219
hsa-mir-151a_39802	-4.3153	0.0608	0.5224
RNY4P10-201_40823	24.3699	0.0608	0.5225
RNY4-201_138776	-3.2675	0.0608	0.5223
hsa-let-7b_197740	-1.4923	0.0608	0.5226
hsa-mir-12136_353866	-1.5091	0.0603	0.5241
hsa-mir-629_374173	-2.5725	0.0603	0.5242
RNY4P10-201_64382	-0.7358	0.0602	0.5247
hsa-mir-24-1_81678	0.9804	0.0601	0.525
ENST00000387377.1_385813	1.6796	0.06	0.5252
hsa-mir-181b-2_389305	-12.832	0.0598	0.5259
tRNA-Glu-CTC-1-1_79311	-2.0139	0.0597	0.5264
ENST00000387377.1_153406	1.004	0.0597	0.5264
hsa-mir-335_299839	2.119	0.0595	0.5272
hsa-mir-21_216457	37.3994	0.0594	0.5275
hsa-mir-15b_123295	3.1999	0.0593	0.5277
tRNA-Glu-CTC-1-7_380191	-215.786	0.0593	0.5276
hsa-mir-26a-2_370766	3.3446	0.0592	0.528
hsa-mir-196b_244690	-1.7804	0.059	0.5287
RNY1-201_295577	-16.0481	0.059	0.529
hsa-mir-21_326357	24.7148	0.0588	0.5296
RP11-317N8.1-001_334567	-16.335	0.0587	0.5301
hsa-mir-454_343771	5.2305	0.0584	0.5312
hsa-mir-484_271349	2.2217	0.0583	0.5313
hsa-mir-27b_266840	1.3363	0.0582	0.5318
hsa-mir-126_45281	21.0881	0.058	0.5325
hsa-mir-486-2_173213	6.9734	0.058	0.5324
hsa-mir-152_223920	1.2993	0.058	0.5323
hsa-mir-186_136219	2.2859	0.0579	0.533
RNY4-201_194504	-0.8374	0.0578	0.5332
ENST00000363331.1_262616	-6.4589	0.0578	0.5331
hsa-mir-342_202301	2.6243	0.0576	0.534
RNY4-201_215978	-2.2645	0.0575	0.5344
hsa-mir-146b_136615	-3.7376	0.0574	0.5347
MT-CO2-201_311323	3.528	0.0574	0.5346
tRNA-Gly-GCC-1-5_340028	-21.798	0.0574	0.5347
hsa-mir-195_4600	7.7686	0.0572	0.5353
hsa-mir-223_162627	6.2279	0.0572	0.5352
RNY4P7-201_268722	-3.6538	0.0572	0.5354
hsa-mir-92a-2_236612	4.1745	0.0567	0.5371
RP11-317N8.1-001_124333	1.2909	0.0564	0.5382
ENST00000464816.1_51623	-16.9019	0.0563	0.5386
RNY4-201_139615	-4.0373	0.0562	0.5391
hsa-mir-1908_284186	1.3347	0.0562	0.539
hsa-mir-151a_26678	1.4139	0.0561	0.5396
hsa-mir-29c_163565	10.5168	0.0561	0.5395
hsa-mir-103b-1_309187	1.8596	0.0558	0.5407
hsa-mir-142_75628	0.7229	0.0555	0.5419
tRNA-Leu-CAG-2-2_309767	6.6807	0.0554	0.542
hsa-mir-26a-2_231466	27.9634	0.0553	0.5424
RNY4P20-201_168308	-23.7372	0.0552	0.543
hsa-mir-223_186937	-7.1414	0.0552	0.543
hsa-mir-30d_386110	4.21	0.0552	0.543
hsa-mir-144_187603	1.5616	0.055	0.5435
hsa-mir-21_244101	43.4161	0.0549	0.5441
RNY4P3-201_124666	-26.6624	0.0548	0.5442
hsa-mir-335_176788	1.3511	0.0548	0.5444
hsa-mir-142_331749	2.9612	0.0548	0.5445
RNY4P10-201_123772	-1.4882	0.0547	0.5448
hsa-mir-30d_88064	0.7656	0.0544	0.546
RNY4-201_376505	-4.6275	0.0544	0.546
hsa-mir-151a_83353	-0.9884	0.0541	0.5469
RP11-469L3.1-001_187269	-5.1178	0.0541	0.5471
hsa-mir-487a_3741	-0.8436	0.0539	0.548
hsa-mir-378a_335037	-9.7522	0.0539	0.5477
hsa-mir-320a_349082	-10.2396	0.0539	0.5478
ENST00000445125.2_269959	-67.841	0.0538	0.548
hsa-mir-23a_199622	-9.2784	0.0537	0.5485
ENST00000387377.1_205741	2.982	0.0536	0.5489
hsa-mir-369_24316	29.3038	0.0535	0.5492
RP11-846F4.3-001_3177	-18.4339	0.0534	0.5498
hsa-mir-221_82969	-7.8645	0.0529	0.5517
hsa-mir-126_182124	0.4239	0.0529	0.5518
hsa-mir-660_216623	3.1834	0.0529	0.5516
hsa-mir-24-2_316019	-23.0528	0.0529	0.5518
hsa-mir-150_84914	-469.025	0.0527	0.5522
hsa-mir-10b_190341	1.6572	0.0526	0.5527
RNY4-201_246270	-1.6212	0.0526	0.5527
hsa-mir-21_268033	-3.5054	0.0523	0.554
ENST00000410794.1_307513	-2.6951	0.0523	0.5538
hsa-mir-320a_39966	11.6405	0.0519	0.5553
hsa-mir-27a_307688	2.6043	0.0519	0.5555
hsa-mir-146a_25522	58.3112	0.0518	0.5559
hsa-mir-26b_35208	10.9913	0.0514	0.5574
hsa-mir-92a-1_161144	2.4099	0.0514	0.5573
RP1-223H12.1-002_277454	-2.3581	0.0514	0.5575
hsa-mir-92a-1_125943	4.3794	0.0513	0.558
hsa-let-7a-3_2823	-0.9503	0.0512	0.5582
hsa-let-7a-1_207520	1.5306	0.0512	0.5582
hsa-mir-382_357884	-38.8168	0.0511	0.5587
hsa-mir-146a_138396	-1.9718	0.0509	0.5595
hsa-mir-24-2_286810	-1.6508	0.0508	0.5597
hsa-mir-4433a_166366	-6.9213	0.0507	0.5603
hsa-mir-486-2_293096	4.654	0.0504	0.5616
hsa-mir-144_175086	4.3044	0.0503	0.5619
hsa-let-7c_244606	-3.5579	0.05	0.563
ENST00000387459.1_19188	1.7033	0.0498	0.5637
hsa-mir-10b_40203	3.4685	0.0498	0.5639
hsa-mir-342_300376	-3.5601	0.0498	0.5638
hsa-mir-331_55989	1.5982	0.0497	0.5644
hsa-mir-155_15534	12.5111	0.0496	0.5646
hsa-mir-148a_23323	30.2626	0.0494	0.5653
RNY4P10-201_82721	40.1112	0.0492	0.5662
hsa-mir-26a-2_317582	1.9613	0.0491	0.5668
ENST00000365448.1_96188	-6.1397	0.049	0.5671
RNY4P9-201_6345	-6.9063	0.0489	0.5673
hsa-mir-145_64306	-0.7334	0.0488	0.5679
hsa-mir-30a_155313	1.0787	0.0488	0.5679
hsa-mir-505_322378	-4.3983	0.0488	0.5678
hsa-let-7b_372918	1.2199	0.0486	0.5685
hsa-mir-140_122707	-10.3432	0.0485	0.5691
hsa-mir-122b_179495	3.1531	0.0485	0.5692
hsa-mir-126_47964	-1.3441	0.0484	0.5696
hsa-mir-486-2_286917	6.7113	0.0482	0.5703
hsa-mir-451b_309627	2.9281	0.0481	0.5708
hsa-mir-1249_107525	1.6132	0.048	0.571
hsa-mir-223_213079	1.3149	0.048	0.5712
hsa-mir-532_242003	-1.3004	0.048	0.5711
hsa-mir-222_189672	-4.9339	0.0479	0.5716
hsa-mir-486-2_271985	10.272	0.0478	0.5719
hsa-mir-320a_298121	4.3607	0.0477	0.5724
hsa-mir-1468_168007	-3.6361	0.0476	0.573
RNY4P27-201_221640	-1.6644	0.0476	0.5728
RNY4P10-201_353533	46.3989	0.0476	0.5729
hsa-mir-30e_369968	4.6577	0.0476	0.5729
hsa-mir-421_189811	2.6503	0.0472	0.5743
hsa-mir-92a-2_337828	1.4868	0.047	0.5753
hsa-mir-4446_249885	1.6395	0.0468	0.5761
hsa-mir-30a_86612	2.3139	0.0467	0.5765
hsa-mir-151a_135844	-29.8736	0.0467	0.5765
hsa-mir-3615_202561	1.4367	0.0467	0.5765
hsa-mir-486-2_156609	4.7363	0.0465	0.5772
hsa-mir-495_158727	-4.1526	0.0465	0.5774
hsa-mir-342_179583	-0.6232	0.0465	0.5772
hsa-mir-320a_279540	-5.9953	0.0465	0.5773
RNY4-201_372350	-5.1077	0.0465	0.5776
hsa-mir-425_2291	-3.6217	0.0464	0.5777
hsa-let-7b_279485	-2.7974	0.0463	0.5781
hsa-mir-28_292566	1.276	0.0463	0.5781
hsa-mir-17_34235	8.0147	0.0462	0.5785
hsa-mir-146a_69461	4.3469	0.0461	0.5789
hsa-mir-101-1_58536	1.7286	0.0456	0.581
hsa-mir-140_161257	0.5803	0.0456	0.581
hsa-mir-150_346055	-3.6205	0.0456	0.5811
RNY4P20-201_373629	-10.3368	0.0456	0.5812
hsa-mir-1-2_265226	-9.4589	0.0455	0.5818
hsa-mir-320a_1508	1.6946	0.0452	0.583
hsa-mir-664a_16640	1.9513	0.0451	0.5833
hsa-mir-222_42720	-30.9967	0.0451	0.5831
SMC1A-202_152816	-18.5526	0.0451	0.5832
RNY4-201_259811	6.0034	0.045	0.5836
hsa-mir-320a_199845	-0.874	0.0449	0.5841
hsa-mir-486-2_307147	-4.1821	0.0448	0.5846
hsa-mir-126_165887	0.7331	0.0443	0.5865
hsa-let-7g_217192	7.1529	0.0442	0.587
hsa-let-7a-1_301188	8.0009	0.0439	0.5886
hsa-let-7d_256447	2.5787	0.0438	0.5888
hsa-mir-30a_206712	2.7782	0.0437	0.5894
hsa-mir-24-2_277985	1.5674	0.0437	0.5895
hsa-mir-382_161967	-4.6566	0.0435	0.5903
hsa-mir-222_77751	1.2567	0.0434	0.5905
RP11-694I15.3-003_228850	-10.6384	0.0434	0.5905
hsa-mir-150_351511	-25.6543	0.0434	0.5907
tRNA-Gly-CCC-2-2_164921	-1.7141	0.0433	0.5911
hsa-mir-374a_253183	4.3176	0.0433	0.591
hsa-mir-101-1_281452	66.0311	0.0432	0.5915
SMC1A-202_91374	-4.5777	0.0431	0.5922
CTB-54O9.4-002_362947	-9.8544	0.0431	0.5919
tRNA-iMet-CAT-1-8_329746	-0.9145	0.043	0.5924
tRNA-Pro-TGG-1-1_9944	2.6193	0.0429	0.5928
RNY4-201_195286	-0.9191	0.0428	0.5931
RNY4P10-201_240614	-11.2912	0.0428	0.5932
hsa-let-7d_238696	-6.0178	0.0427	0.5936
hsa-mir-655_330438	1.2138	0.0427	0.5937
hsa-mir-664a_302786	4.8423	0.0426	0.5941
hsa-let-7b_388552	4.5546	0.0424	0.5951
hsa-mir-486-2_367000	-35.5248	0.0422	0.5959
RNY4P18-201_327284	-11.9176	0.0421	0.5963
tRNA-Glu-TTC-14-1_249117	-1.5707	0.042	0.5967
hsa-mir-486-2_319215	2.9027	0.042	0.5967
RNY4-201_107108	-32.5288	0.0419	0.5972
hsa-mir-151a_180172	-2.2116	0.0418	0.5977
tRNA-Gly-GCC-1-5_357681	-3.9014	0.0418	0.5975
hsa-mir-4433a_295873	-2.2664	0.0417	0.598
hsa-let-7d_357309	5.2905	0.0416	0.5986
hsa-mir-30d_131142	57.585	0.0415	0.5992
hsa-mir-328_355682	2.9115	0.0415	0.5989
hsa-mir-532_230143	14.0006	0.0414	0.5997
hsa-mir-23a_246903	-4.4945	0.0414	0.5996
AC040162.22-012_118933	-6.0991	0.0413	0.6001
RNY4P16-201_236477	23.889	0.0412	0.6005
hsa-mir-103b-1_156198	1.8444	0.0411	0.6008
SMC1A-202_186134	-13.0155	0.0411	0.6011
hsa-mir-186_122545	-11.826	0.0408	0.6023
hsa-mir-223_171479	2.372	0.0408	0.6021
hsa-mir-381_297718	-3.9249	0.0408	0.6023
hsa-mir-122b_164476	-6.9997	0.0407	0.6027
RNY4P7-201_69432	-7.4418	0.0404	0.6041
hsa-mir-29c_212975	-1.6389	0.0404	0.604
hsa-mir-323a_160948	6.7447	0.0403	0.6044
hsa-mir-379_228632	-1.4653	0.0403	0.6044
hsa-mir-126_296346	262.852	0.0402	0.6051
hsa-mir-320c-1_334080	-3.9421	0.0402	0.6049
ENST00000387441.1_5845	2.8867	0.0401	0.6055
hsa-mir-146a_255194	-4.344	0.0401	0.6056
hsa-let-7b_217805	0.6542	0.0399	0.6064
RNY4-201_308176	-6.6133	0.0398	0.6069
RNY4-201_125731	-1.3161	0.0397	0.6072
RNY3-201_144202	-6.3486	0.0397	0.6074
RNY4P20-201_322127	-2.5979	0.0397	0.6071
hsa-mir-4433a_326219	-2.7271	0.0397	0.6074
hsa-mir-26b_57140	-4.9634	0.0396	0.6077
hsa-mir-30d_246772	-2.9766	0.0395	0.6083
RNY4P10-201_297365	-5.8002	0.0393	0.6089
tRNA-Ser-GCT-6-1_373174	-3.3886	0.0393	0.6091
hsa-mir-942_296302	-2.2193	0.0392	0.6098
hsa-mir-151a_232266	-11.8486	0.0391	0.61
RNY4P7-201_295015	-46.0465	0.0391	0.6101
RP11-215L17.2-001_146417	2.0176	0.039	0.6106
hsa-let-7d_189652	134.752	0.039	0.6106
RP3-481F12.6-001_16984	126.029	0.0389	0.6112
hsa-mir-151a_24570	-1.725	0.0387	0.6121
hsa-mir-98_98498	9.2821	0.0387	0.6121
hsa-mir-29a_177349	-1.6144	0.0387	0.6119
hsa-mir-223_197400	0.6096	0.0387	0.6121
hsa-mir-486-2_24765	26.739	0.0385	0.6128
hsa-mir-151a_140843	1.0927	0.0385	0.613
hsa-mir-361_180183	-5.6101	0.0384	0.6134
hsa-mir-26a-2_311153	1.3374	0.0384	0.6136
hsa-mir-451b_373012	8.5272	0.0382	0.6143
hsa-mir-223_102627	1.5577	0.0381	0.6149
hsa-mir-144_17506	4.4349	0.038	0.6152
hsa-mir-148b_89366	-4.1958	0.0377	0.6167
hsa-mir-222_154723	-16.7694	0.0377	0.6167
tRNA-Glu-CTC-1-1_275686	-1.2918	0.0377	0.6166
tRNA-Glu-CTC-1-1_267714	0.9854	0.0376	0.6169
hsa-mir-26a-2_107274	0.6703	0.0375	0.6176
hsa-mir-652_1558	-2.7059	0.0372	0.619
hsa-mir-410_282457	4.1538	0.0372	0.6193
hsa-mir-26b_355155	0.7854	0.0372	0.6192
hsa-let-7d_383741	7.4834	0.0371	0.6198
hsa-let-7a-1_78189	4.1329	0.0368	0.6208
hsa-mir-30c-2_276258	25.979	0.0368	0.621
hsa-mir-150_172951	-1.6058	0.0366	0.6221
ENST00000410794.1_351499	1.8902	0.0366	0.6222
hsa-let-7g_351822	0.9765	0.0366	0.6217
hsa-mir-16-1_137057	0.6494	0.0364	0.6231
RNY4-201_136827	-10.2709	0.0363	0.6234
ENST00000500358.6_343360	-8.1047	0.0363	0.6236
hsa-mir-3184_131420	-5.4837	0.0362	0.6237
hsa-let-7b_374171	1.0724	0.0362	0.6239
hsa-mir-23a_81573	-3.9416	0.0361	0.6244
hsa-let-7d_222809	0.8852	0.0361	0.6243
hsa-mir-146a_97502	17.5199	0.0358	0.6257
hsa-mir-23a_207528	-4.3895	0.0357	0.6261
tRNA-Glu-TTC-2-2_348039	9.3636	0.0356	0.6269
hsa-let-7g_4469	8.5826	0.0354	0.6281
hsa-mir-29b-2_242071	2.3415	0.0354	0.6279
ENST00000387409.1_76094	1.6637	0.0353	0.6285
hsa-mir-1249_274136	-4.0297	0.0352	0.629
hsa-mir-339_387678	-0.9994	0.0352	0.6291
hsa-mir-486-2_387945	-0.9732	0.0352	0.6288
hsa-let-7b_77010	-0.4657	0.0351	0.6295
hsa-mir-30d_161360	0.5869	0.0351	0.6294
RNY4-201_353593	-4.0798	0.0351	0.6296
hsa-mir-95_334212	1.4133	0.035	0.63
hsa-let-7d_374627	44.0779	0.035	0.63
hsa-mir-140_22504	-12.1776	0.0349	0.6301
hsa-mir-126_365762	1.6086	0.0348	0.6309
hsa-let-7a-3_382347	5.1566	0.0348	0.6309
hsa-mir-486-2_162670	0.9664	0.0347	0.6315
RP11-315I20.11-001_93229	-3.2057	0.0346	0.6321
hsa-let-7i_141053	3.0597	0.0346	0.6317
ENST00000464816.1_163843	2.9464	0.0346	0.6317
hsa-mir-25_222963	1.1773	0.0344	0.633
RP11-727F15.8-001_247531	2.9148	0.0344	0.6326
hsa-mir-139_269208	-0.695	0.0344	0.6328
RNY4P16-201_16993	0.7797	0.0343	0.6332
RNY4P16-201_18896	8.9247	0.0343	0.6333
RP11-317N8.1-001_81889	-1.3275	0.0343	0.6334
hsa-mir-361_132694	5.5492	0.0342	0.6339
hsa-mir-3184_159349	-3.2603	0.0342	0.6339
hsa-mir-379_62170	-11.8196	0.0341	0.6342
hsa-mir-320a_37580	-2.0015	0.034	0.6347
RP11-694I15.3-003_122763	-7.6761	0.0338	0.6358
hsa-mir-126_280532	0.6748	0.0338	0.636
hsa-mir-92a-2_186498	-3.9568	0.0337	0.6364
hsa-mir-92a-1_327593	36.3738	0.0336	0.6367
hsa-mir-3184_70694	-1.8779	0.0335	0.6373
hsa-mir-223_116964	0.4781	0.0335	0.6374
hsa-mir-151a_203330	-2.247	0.0335	0.6371
hsa-let-7d_338544	9.7511	0.0335	0.6373
RNY4P18-201_34333	-5.9122	0.0334	0.638
hsa-mir-181b-2_180859	-1.8456	0.0334	0.6379
hsa-mir-25_69758	1.4516	0.0333	0.6383
tRNA-Leu-CAG-2-2_88942	2.0163	0.0333	0.6386
RNY4P10-201_103899	-55.7685	0.0332	0.6389
hsa-mir-345_263957	1.1038	0.0332	0.6388
hsa-mir-484_261064	-0.7131	0.0331	0.6394
hsa-mir-451b_25065	6.0275	0.033	0.6399
hsa-mir-140_35439	-14.8371	0.033	0.64
hsa-mir-92a-1_55913	41.6791	0.033	0.6401
hsa-mir-3184_177888	2.287	0.033	0.64
hsa-mir-191_137776	-1.8794	0.0329	0.6403
hsa-mir-378a_268345	-1.3922	0.0329	0.6404
RNY4P10-201_371910	-5.761	0.0329	0.6404
ENST00000445125.2_98413	-1.2874	0.0325	0.6426
hsa-mir-223_126531	-1.1253	0.0325	0.6423
ENST00000445125.2_361331	-6.79	0.0325	0.6423
hsa-mir-361_210751	-1.8038	0.0324	0.643
ENST00000389680.2_389160	-0.8411	0.0324	0.6428
ENST00000364678.1_312461	-2.1006	0.0323	0.6438
ENST00000362512.1_337937	1.2689	0.0322	0.6442
hsa-mir-182_47411	-1.1329	0.0321	0.6446
hsa-mir-27b_132733	3.9633	0.0321	0.6446
tRNA-Pro-TGG-1-1_304637	2.0817	0.0321	0.6447
RNY4-201_345124	35.1563	0.032	0.6449
hsa-mir-181a-2_100680	-1.8686	0.0319	0.6456
hsa-mir-652_123579	-0.6732	0.0319	0.6456
RNY4P7-201_134413	-1.32	0.0318	0.646
hsa-mir-139_15057	2.9896	0.0317	0.6467
hsa-mir-29b-2_148189	4.7929	0.0316	0.6473
hsa-mir-151a_72807	2.166	0.0315	0.6479
hsa-mir-26b_110402	1.7363	0.0315	0.6476
RP3-481F12.6-001_296261	18.1794	0.0315	0.6476
hsa-mir-17_108999	0.7702	0.0312	0.6493
RNY4P10-201_105378	-3.289	0.0311	0.6497
hsa-mir-320a_233026	1.1038	0.0311	0.6498
RNY4-201_122745	2.2733	0.031	0.6504
hsa-mir-1843_284923	2.0413	0.0309	0.6512
hsa-mir-451b_337338	3.9889	0.0307	0.6521
ENST00000387441.1_230525	1.9942	0.0306	0.6527
hsa-mir-486-2_113120	4.3625	0.0305	0.6531
ENST00000445125.2_340468	-4.0391	0.0305	0.6534
hsa-mir-93_241697	-1.8545	0.0303	0.6541
hsa-mir-99b_362070	-3.2297	0.0303	0.6545
hsa-mir-92a-1_255516	-1.3112	0.0299	0.6564
hsa-let-7e_273015	1.2383	0.0299	0.6565
hsa-mir-126_274372	3.7154	0.0299	0.6566
hsa-mir-19b-2_81413	9.6557	0.0298	0.6571
tRNA-Val-CAC-3-1_221386	-3.5077	0.0297	0.6576
AC106782.9-001_125022	-5.9922	0.0296	0.6582
hsa-mir-495_188734	-3.1389	0.0296	0.658
hsa-mir-320a_199857	-9.7971	0.0296	0.6581
hsa-mir-3184_363293	-4.4801	0.0296	0.6581
hsa-mir-363_105467	-2.0583	0.0294	0.6594
RNY4P7-201_116783	-0.8397	0.0292	0.6602
hsa-mir-320a_149006	-520.098	0.0292	0.6601
hsa-mir-99b_255851	-0.7618	0.0292	0.6604
tRNA-Glu-TTC-2-2_151603	-2.0376	0.0289	0.6621
hsa-mir-320c-1_309971	-0.9485	0.0289	0.6617
hsa-mir-361_201594	-0.603	0.0288	0.6627
hsa-let-7b_312702	82.5135	0.0287	0.6631
hsa-mir-409_70991	-2.6251	0.0286	0.6637
hsa-mir-330_241722	1.7134	0.0285	0.6641
hsa-mir-186_165656	-20.599	0.0284	0.6646
hsa-mir-221_223399	-7.7937	0.0284	0.6646
hsa-mir-140_372828	2.0711	0.0284	0.6648
hsa-mir-421_119004	3.4536	0.0283	0.6655
hsa-let-7c_138439	-4.2309	0.0283	0.6651
ENST00000363120.1_33624	-4.572	0.0282	0.6659
ENST00000387347.2_148752	-2.2136	0.0282	0.6658
hsa-mir-151a_341589	-1.0217	0.0282	0.666
hsa-mir-27b_289617	12.4064	0.0281	0.6666
hsa-mir-27b_190106	27.4138	0.028	0.6667
hsa-mir-140_33301	1.4595	0.0279	0.6673
hsa-mir-486-2_89891	-0.9154	0.0279	0.6676
hsa-mir-223_244059	9.7138	0.0279	0.6675
hsa-mir-10a_270052	-0.5294	0.0279	0.6677
hsa-mir-151a_61495	1.8299	0.0278	0.6683
hsa-mir-103a-1_385274	-1.4772	0.0278	0.6684
RP11-315I20.11-001_347657	-3.1668	0.0273	0.6712
ENST00000387347.2_41536	0.6145	0.0272	0.6715
RNY4P7-201_306687	-1.2542	0.0272	0.6716
hsa-mir-331_14856	0.7752	0.0271	0.6723
hsa-mir-185_32536	1.496	0.0271	0.6723
hsa-mir-140_38632	1.959	0.0271	0.6723
hsa-mir-629_132800	0.8389	0.0268	0.674
hsa-mir-142_188517	1.9184	0.0267	0.6743
hsa-mir-10a_220412	0.917	0.0267	0.6747
RP11-846F4.3-001_316474	-2.4672	0.0267	0.6746
hsa-mir-181c_21186	-2.0464	0.0266	0.6751
hsa-mir-29a_36837	28.5407	0.0266	0.6748
hsa-mir-26a-2_270108	0.7557	0.0265	0.6757
ENST00000506329.2_249714	-2.0847	0.0263	0.6765
hsa-mir-142_25802	-7.6801	0.0259	0.6792
hsa-mir-30c-2_5252	5.2065	0.0258	0.6799
hsa-mir-186_209163	-0.8278	0.0257	0.6805
hsa-mir-10b_300404	-5.1084	0.0256	0.681
hsa-mir-3184_102770	-20.4162	0.0255	0.6813
hsa-mir-451b_262653	-1.7986	0.0255	0.6817
hsa-mir-486-2_369505	2.0936	0.0254	0.6819
RNY4P10-201_382259	7.7191	0.0254	0.6824
hsa-mir-30c-2_54772	1.1035	0.0253	0.6825
hsa-mir-181b-2_233302	-5.6123	0.0253	0.6827
hsa-let-7b_316390	-2.7935	0.0253	0.6827
ENST00000387377.1_183562	-4.3334	0.0252	0.6832
hsa-mir-23b_273824	-7.9035	0.0252	0.6834
hsa-let-7g_238327	2.1861	0.0251	0.6841
hsa-mir-12136_357425	-1.3063	0.0251	0.6842
hsa-mir-92b_52761	0.9161	0.0248	0.6856
hsa-mir-576_317512	-0.9936	0.0248	0.6855
hsa-mir-25_244339	20.7242	0.0247	0.6866
hsa-let-7d_275847	14.2937	0.0247	0.6866
hsa-mir-199a-1_318521	67.261	0.0246	0.6868
[truncated: 719 more rows]

## Sheet: control converters to AD
gene	slope	r-squared	p-value
hsa-mir-10527_99884	-4.9455	0.9852	0.0001
hsa-mir-92a-1_212023	5.7148	0.9506	0.0009
hsa-mir-17_108999	-3.3756	0.9393	0.0014
hsa-mir-181a-2_271230	-1.8259	0.9036	0.0036
ENST00000387347.2_316991	-0.9775	0.9013	0.0038
hsa-mir-133a-2_206057	-7.3918	0.892	0.0045
hsa-mir-548j_244554	-8.2869	0.8851	0.0052
hsa-mir-25_148318	-26.644	0.8773	0.0059
hsa-mir-378a_152632	-7.4502	0.8716	0.0065
hsa-mir-17_141595	-11.7487	0.8694	0.0067
RNY4P23-201_12764	-2.6694	0.8671	0.0069
hsa-let-7g_351822	-3.6019	0.8655	0.0071
hsa-mir-133a-2_267525	-8.0887	0.8625	0.0074
RNY4-201_221171	-14.1654	0.858	0.008
hsa-mir-769_250279	-10.1994	0.8555	0.0082
hsa-let-7b_185161	4.27	0.8336	0.011
hsa-mir-324_302482	-11.233	0.8333	0.0111
hsa-mir-335_331039	87.0989	0.8286	0.0117
hsa-mir-10b_82231	5.028	0.8123	0.0141
hsa-mir-139_33895	1.8174	0.7967	0.0167
hsa-mir-126_265758	11.5916	0.7958	0.0168
hsa-mir-320a_324113	-6.0116	0.7914	0.0176
hsa-mir-21_242815	2.5684	0.7842	0.0189
hsa-mir-28_73278	-28.6612	0.7822	0.0193
hsa-mir-320b-1_345253	-5.3812	0.7761	0.0204
hsa-let-7c_230503	49.2652	0.7751	0.0206
hsa-mir-425_342583	-2.8035	0.7737	0.0209
hsa-mir-425_84590	-7.5478	0.7735	0.0209
hsa-mir-28_162458	-3.5624	0.7711	0.0214
hsa-mir-320a_161578	-50.8739	0.77	0.0216
hsa-mir-652_1558	7.5382	0.7648	0.0226
hsa-let-7b_316390	10.0435	0.7642	0.0228
hsa-mir-27b_348948	4.3316	0.7629	0.023
hsa-mir-181b-2_110912	-11.519	0.7627	0.0231
hsa-let-7g_327171	7.9045	0.762	0.0232
hsa-mir-409_375847	2.7054	0.7612	0.0234
hsa-let-7a-3_144510	-0.6561	0.7524	0.0252
hsa-mir-181a-2_217039	-8.6612	0.7477	0.0262
hsa-mir-181c_21186	-5.922	0.7463	0.0265
RP11-317N8.1-001_334567	11	0.7462	0.0265
tRNA-Glu-TTC-2-2_151603	-5.2922	0.7434	0.0272
hsa-mir-574_13392	-8.2183	0.7424	0.0274
hsa-mir-10b_381432	124.221	0.7423	0.0274
hsa-mir-1307_340977	-12.4325	0.7407	0.0278
hsa-mir-1307_289649	-40.7535	0.7377	0.0285
hsa-let-7g_133155	1.2296	0.7334	0.0294
hsa-mir-4433a_16147	-5.4018	0.7258	0.0312
hsa-mir-16-1_297369	4.3899	0.7175	0.0333
AC005263.8-002_230222	-8.1538	0.7127	0.0345
hsa-let-7a-1_245625	12.1299	0.7084	0.0356
hsa-mir-181a-2_100680	-6.2143	0.7042	0.0367
ENST00000464816.1_171001	1.6036	0.7018	0.0374
hsa-mir-17_386691	-46.7986	0.698	0.0384
hsa-mir-223_151594	17.4133	0.6964	0.0388
hsa-let-7f-2_168690	6.8962	0.6895	0.0407
hsa-mir-151a_232266	-44.3752	0.6893	0.0408
hsa-mir-24-2_309411	-4.6092	0.6881	0.0411
hsa-mir-106b_362808	-3.2408	0.6879	0.0412
tRNA-Pro-TGG-3-5_290349	-4.3944	0.6863	0.0416
hsa-mir-342_304084	2.8184	0.6835	0.0424
hsa-mir-320a_336052	-179.691	0.6797	0.0435
hsa-mir-425_174220	-117.156	0.6762	0.0446
hsa-mir-335_62543	12.6499	0.6757	0.0447
hsa-mir-106b_97144	-2.7847	0.6756	0.0447
hsa-mir-3615_228758	-6.4728	0.6747	0.045
hsa-mir-374c_123683	3.1396	0.6745	0.0451
hsa-mir-320a_199857	-29.3187	0.6731	0.0455
ENST00000410794.1_87152	3.0346	0.6674	0.0472
hsa-mir-22_284493	6.3469	0.6664	0.0475
RNY1-201_346103	27.7494	0.6601	0.0495
hsa-mir-21_235688	-9.7692	0.6598	0.0495
hsa-mir-369_205124	7.5934	0.6592	0.0497
hsa-mir-320a_109808	-21.0031	0.6587	0.0499
hsa-mir-92a-1_232082	5.4382	0.6575	0.0503
ENST00000387460.2_88280	-84.3191	0.6573	0.0503
hsa-mir-421_119004	-16.0021	0.657	0.0504
hsa-mir-181a-2_114801	-2.7331	0.6568	0.0505
RNY4P16-201_317202	-8.0571	0.6556	0.0509
hsa-mir-320a_25760	-110.533	0.6526	0.0518
hsa-mir-324_147235	-3.5838	0.6516	0.0522
hsa-mir-24-2_99744	1.6003	0.651	0.0524
hsa-mir-320a_39966	-31.9394	0.648	0.0533
hsa-mir-26a-2_95803	-5.0308	0.6459	0.054
hsa-mir-26a-2_73038	-7.9722	0.6438	0.0547
hsa-mir-1307_63212	-32.2417	0.6422	0.0553
hsa-mir-320c-1_310012	-4.776	0.6416	0.0555
hsa-let-7a-1_155068	2.0368	0.6365	0.0572
hsa-mir-3184_15621	-2.1476	0.6339	0.0581
hsa-mir-126_139186	3.4549	0.6329	0.0584
hsa-mir-92a-2_337828	1.9252	0.6327	0.0585
hsa-mir-181b-2_233302	-9.3514	0.6314	0.059
tRNA-Glu-TTC-2-2_324784	-10.1305	0.6298	0.0595
RNY4-201_77586	-8.9865	0.6296	0.0596
hsa-mir-130b_42509	6.6558	0.6269	0.0605
tRNA-Ser-GCT-6-1_373174	-13.0995	0.6261	0.0608
hsa-mir-425_286911	-11.2015	0.6203	0.0629
hsa-mir-505_322378	-13.7897	0.6123	0.0658
hsa-mir-30a_355731	4.1056	0.6106	0.0665
hsa-mir-210_93088	-3.7986	0.6105	0.0665
hsa-mir-654_84151	9.8757	0.609	0.0671
hsa-mir-10b_12801	22.2234	0.6089	0.0671
hsa-let-7g_42084	98.6115	0.608	0.0674
hsa-mir-320a_17488	-3.2443	0.6074	0.0677
hsa-mir-1307_64895	-3.9399	0.6073	0.0677
hsa-let-7b_214705	0.846	0.6072	0.0677
hsa-mir-378a_27695	-54.1671	0.6057	0.0683
hsa-mir-27a_113742	4.3264	0.6056	0.0683
hsa-mir-378a_125774	-16.0974	0.6046	0.0687
hsa-mir-320a_149006	-1543.93	0.6009	0.0701
RNY1-201_94347	-2.5669	0.5969	0.0717
hsa-mir-548j_378275	-3.1947	0.5961	0.072
hsa-mir-320a_271104	-10.6545	0.5946	0.0726
hsa-mir-222_139762	-1.2726	0.5931	0.0732
hsa-mir-3184_70694	-5.0615	0.5923	0.0735
hsa-mir-98_98498	-34.9073	0.5919	0.0737
hsa-mir-181a-2_16363	-42.7078	0.5895	0.0746
hsa-mir-625_373055	-5.3278	0.5847	0.0766
hsa-mir-152_98966	-39.4684	0.5842	0.0768
hsa-mir-139_108018	21.009	0.5831	0.0772
hsa-let-7a-1_275362	11.1839	0.5821	0.0776
hsa-mir-101-1_58536	7.395	0.5807	0.0782
hsa-mir-21_97706	3.4457	0.5795	0.0787
hsa-mir-139_15057	13.7127	0.5792	0.0788
hsa-mir-26a-2_101255	1.7712	0.5791	0.0789
hsa-mir-1307_74442	-12.9051	0.5769	0.0798
hsa-let-7i_141053	3.3438	0.5754	0.0804
hsa-mir-26a-2_138135	6.356	0.575	0.0806
hsa-mir-22_52166	6.256	0.5743	0.0809
hsa-mir-654_311909	4.1862	0.5725	0.0816
hsa-mir-181a-2_338902	-33.3326	0.5712	0.0822
hsa-mir-21_114077	-1.8542	0.5701	0.0827
hsa-let-7a-1_341733	2.4213	0.569	0.0831
hsa-mir-30d_52856	3.507	0.5689	0.0831
hsa-mir-16-2_235184	33.8809	0.5685	0.0833
hsa-let-7f-2_67899	10.6246	0.5683	0.0834
RNY4P23-201_118422	-21.5253	0.5677	0.0837
hsa-mir-28_220485	-1.9683	0.5659	0.0845
hsa-mir-92a-1_46137	3240.94	0.5654	0.0847
hsa-mir-17_34235	-27.0483	0.5639	0.0853
hsa-mir-92a-2_328257	1.8811	0.5637	0.0854
hsa-mir-223_214688	2.5673	0.5634	0.0855
tRNA-Gly-CCC-2-2_34564	-5.972	0.5619	0.0862
hsa-mir-320a_91522	-310.617	0.5611	0.0865
hsa-mir-27b_139883	10.3543	0.5607	0.0867
hsa-let-7a-1_382583	1.4249	0.5603	0.0869
hsa-mir-26b_16105	-11.781	0.56	0.087
hsa-let-7d_176007	3.414	0.5591	0.0874
hsa-let-7a-1_86785	34.0748	0.5586	0.0876
hsa-mir-1307_295816	-6.8719	0.5586	0.0876
hsa-mir-26b_16349	2.7357	0.558	0.0879
RP3-481F12.6-001_16984	-92.6827	0.5576	0.0881
hsa-mir-223_265602	-3.77	0.5561	0.0888
hsa-mir-486-2_146579	4.7637	0.5552	0.0892
RNY4-201_372350	-10.3305	0.5537	0.0898
hsa-mir-139_97503	5.0892	0.5511	0.091
hsa-mir-27b_248320	4.2587	0.551	0.0911
hsa-mir-26a-2_44861	-2.7739	0.5505	0.0913
hsa-mir-29a_99134	1.4368	0.5486	0.0922
hsa-mir-151a_301748	-12.413	0.5484	0.0922
hsa-mir-145_33620	1.0011	0.5476	0.0926
hsa-mir-1307_132007	-1.1891	0.5473	0.0927
hsa-mir-323b_164411	3.0868	0.5456	0.0935
hsa-mir-10b_166392	7.9533	0.5456	0.0935
hsa-let-7a-1_143357	0.948	0.5454	0.0936
hsa-mir-320a_383011	-23.9213	0.5454	0.0936
RNY4P10-201_134488	56.1049	0.5453	0.0937
hsa-mir-221_290629	-4.1785	0.5441	0.0942
hsa-mir-92a-2_18914	3.4392	0.5439	0.0943
hsa-mir-30d_130736	1.4775	0.5432	0.0946
ENST00000467525.5_308877	1.393	0.5429	0.0948
hsa-mir-484_86165	3.6835	0.5425	0.095
hsa-mir-101-1_9835	-3.4435	0.5415	0.0954
ENST00000387347.2_286793	2.275	0.5405	0.0959
hsa-mir-92b_45138	3.4652	0.5391	0.0965
hsa-let-7e_273015	2.8462	0.5388	0.0967
hsa-mir-139_149424	2.3672	0.537	0.0975
RP11-752G15.5-002_330089	-6.1333	0.5368	0.0977
ENST00000410794.1_351499	3.4571	0.5334	0.0993
hsa-mir-151a_39802	16.2743	0.5321	0.0999
hsa-mir-361_153985	-3.4651	0.53	0.1009
hsa-mir-92a-2_165956	6.1299	0.5293	0.1012
hsa-let-7e_253017	2.6288	0.5288	0.1015
hsa-mir-223_119217	4.2878	0.5287	0.1015
hsa-mir-27b_367976	14.6852	0.5287	0.1015
hsa-mir-221_22501	-1.627	0.5285	0.1016
tRNA-Trp-CCA-2-1_82703	1.0222	0.5285	0.1016
hsa-mir-21_34569	-1.6151	0.5284	0.1017
hsa-mir-1307_263961	-2.4659	0.5282	0.1018
hsa-mir-93_198675	-65.2258	0.527	0.1023
hsa-let-7i_214139	1.1141	0.5266	0.1025
hsa-let-7a-1_53378	1.0745	0.526	0.1029
RNY4-201_197299	-53.1235	0.5257	0.103
hsa-mir-942_354687	4.0816	0.5223	0.1047
RNY4P16-201_229551	-2.8016	0.5222	0.1047
hsa-mir-486-2_23675	98.4646	0.5219	0.1049
tRNA-Gly-TCC-3-1_7078	-7.4099	0.5196	0.106
RNY4P16-201_38229	-31.2673	0.519	0.1063
hsa-mir-21_203524	1.2368	0.5179	0.1069
hsa-mir-574_328088	-2.3747	0.5178	0.1069
hsa-mir-340_238362	4.4104	0.5169	0.1074
hsa-mir-664a_16640	-2.853	0.5165	0.1076
hsa-mir-505_122469	-3.066	0.5158	0.1079
hsa-mir-126_74195	-0.994	0.5148	0.1084
hsa-mir-330_145504	1.8732	0.5143	0.1087
hsa-mir-152_243687	-5.399	0.5139	0.1089
hsa-mir-4433a_204355	-1.6281	0.5137	0.109
hsa-mir-486-2_46607	20.1764	0.5136	0.1091
hsa-mir-223_347976	2.4506	0.5124	0.1097
hsa-mir-337_68694	9.4397	0.5123	0.1097
hsa-mir-92a-1_119155	3.9234	0.5118	0.11
ENST00000390880.2_125502	-10.2137	0.511	0.1104
hsa-mir-335_176788	5.3926	0.5087	0.1116
hsa-mir-151a_83353	3.2616	0.5068	0.1126
hsa-mir-181a-2_319304	-115.221	0.5053	0.1133
hsa-let-7a-1_301188	12.7943	0.5049	0.1135
hsa-mir-126_160718	47.5636	0.5039	0.1141
hsa-mir-20a_106686	-14.0143	0.5027	0.1147
hsa-mir-181b-2_194442	-21.2216	0.5027	0.1147
hsa-mir-425_48705	-233.447	0.5026	0.1147
hsa-let-7b_47738	41.853	0.5002	0.116
hsa-mir-361_293249	3.1791	0.4993	0.1165
hsa-mir-186_136219	-4.1736	0.4979	0.1172
hsa-mir-320b-1_287521	-1.9515	0.4966	0.1179
hsa-mir-320a_377219	-244.959	0.4958	0.1184
hsa-mir-27b_132733	23.7303	0.4928	0.12
ENST00000387421.1_293951	-2.5414	0.4925	0.1201
hsa-mir-223_258447	9.3402	0.4919	0.1204
hsa-mir-146b_322366	2.2107	0.4912	0.1208
hsa-mir-181a-2_376829	-210.297	0.4902	0.1214
hsa-mir-181d_114741	-8.3229	0.49	0.1215
hsa-mir-92a-1_161144	7.7393	0.4876	0.1228
hsa-mir-126_245822	4.5663	0.4847	0.1244
hsa-mir-99a_351109	3.4474	0.4843	0.1246
hsa-mir-337_1798	47.7427	0.4828	0.1255
hsa-mir-125a_39152	59.5205	0.4826	0.1256
hsa-mir-30a_206712	3.3876	0.4806	0.1267
hsa-mir-151a_31103	-13.7234	0.479	0.1276
hsa-mir-154_303511	2.9343	0.4786	0.1278
hsa-mir-195_3764	3.2133	0.4767	0.1289
hsa-mir-454_227668	-3.7429	0.4752	0.1298
hsa-mir-486-2_386450	5.6788	0.4745	0.1302
hsa-mir-151a_58321	3.242	0.4729	0.1311
hsa-mir-26a-2_379023	-304.14	0.4713	0.132
hsa-mir-126_372981	9.0355	0.4708	0.1323
RNY4P23-201_210609	-4.7621	0.4702	0.1326
hsa-mir-30b_343240	-2.0768	0.4678	0.134
tRNA-Ser-GCT-6-1_288120	-6.4002	0.4676	0.1341
hsa-mir-3184_170600	4.2006	0.4666	0.1347
hsa-mir-92b_14892	1.6424	0.4656	0.1353
hsa-mir-151a_12758	-13.7846	0.4643	0.1361
hsa-mir-92a-1_103397	1.2118	0.4641	0.1362
hsa-mir-29a_352458	8.5971	0.4627	0.137
RNY4P20-201_384384	5.8232	0.4619	0.1375
hsa-mir-181b-2_389305	-18.844	0.4617	0.1377
hsa-mir-139_109056	11.6951	0.4609	0.1381
hsa-mir-28_82976	-34.8426	0.4604	0.1384
hsa-mir-140_13827	4.3342	0.46	0.1386
hsa-mir-17_316402	-2.8365	0.4599	0.1387
hsa-mir-181c_236095	-6.2218	0.4587	0.1394
hsa-mir-769_4906	-4.2218	0.458	0.1398
hsa-mir-29a_6172	-4.9451	0.4574	0.1402
hsa-mir-584_194896	-3.1298	0.4563	0.1409
hsa-mir-4446_240100	-5.7422	0.4561	0.141
hsa-let-7a-1_351055	2.3409	0.4561	0.141
hsa-mir-21_290801	-0.4526	0.4548	0.1418
hsa-mir-574_313068	-8.385	0.4547	0.1418
hsa-mir-425_389306	-44.244	0.4537	0.1424
hsa-mir-27a_74623	48.408	0.4535	0.1425
hsa-let-7f-2_317329	4.9368	0.4531	0.1428
hsa-mir-486-2_160534	14.4354	0.4529	0.1429
hsa-mir-99a_189990	15.1667	0.4528	0.143
hsa-mir-92a-1_349959	3.0008	0.4527	0.143
hsa-mir-26a-2_12921	-2239.92	0.4521	0.1434
hsa-let-7b_317272	20.448	0.4501	0.1447
hsa-mir-223_144306	0.7475	0.4498	0.1448
hsa-mir-186_386396	6.9659	0.4492	0.1452
hsa-mir-339_120818	1.9081	0.4478	0.1461
hsa-mir-151a_180172	-2.3579	0.447	0.1466
hsa-mir-379_322388	-0.7682	0.4466	0.1468
RNY4P10-201_82721	227.507	0.4463	0.147
hsa-mir-146b_107775	11.9716	0.4454	0.1475
hsa-let-7b_313571	43.2843	0.4436	0.1487
hsa-mir-181a-2_219775	-180.215	0.4424	0.1494
hsa-mir-151a_72807	-3.7248	0.4408	0.1504
hsa-mir-30a_150320	5.3245	0.4405	0.1506
hsa-mir-92a-2_288038	4.1609	0.4395	0.1512
hsa-mir-877_288264	2.598	0.4371	0.1528
hsa-mir-324_388008	-6.7206	0.4354	0.1539
hsa-mir-3184_110948	70.8056	0.4347	0.1543
hsa-mir-10b_252256	6.0748	0.4337	0.1549
hsa-mir-320a_140039	-4.5256	0.4334	0.1552
hsa-mir-130a_236470	-4.7254	0.4334	0.1551
hsa-mir-30e_85369	5.4644	0.4333	0.1552
hsa-mir-130a_323698	-4.6643	0.4318	0.1562
hsa-mir-27a_139760	2.2994	0.4315	0.1564
hsa-let-7f-2_39489	3.6983	0.4295	0.1577
hsa-mir-186_235385	5.1789	0.4295	0.1577
ENST00000387314.1_337120	3.0006	0.4293	0.1578
ENST00000387342.1_202883	-75.673	0.4276	0.1589
RNY3-201_209697	-4.9714	0.4268	0.1595
hsa-mir-126_365410	6.9337	0.4268	0.1595
hsa-mir-1-2_265226	-22.421	0.4243	0.1611
hsa-mir-92a-1_206190	63.814	0.4239	0.1614
hsa-mir-27b_266840	6.9301	0.4231	0.1619
hsa-mir-146b_89899	2.6469	0.4227	0.1621
hsa-mir-320a_151590	-20.6035	0.4224	0.1624
hsa-mir-30c-2_54772	11.4539	0.419	0.1647
hsa-mir-23a_310567	-3.9245	0.4175	0.1656
hsa-mir-30c-2_322632	15.3089	0.4168	0.1661
hsa-mir-584_167110	1.3433	0.416	0.1667
hsa-mir-486-2_205732	2.1979	0.416	0.1667
hsa-mir-454_231703	-5.2888	0.4158	0.1668
hsa-let-7d_222809	4.0286	0.4155	0.167
hsa-mir-26a-2_184666	-1.6542	0.4151	0.1673
hsa-mir-92a-1_53276	3.6859	0.4132	0.1686
hsa-let-7b_68877	4.0572	0.4127	0.1689
hsa-mir-128-1_340674	3.3729	0.4123	0.1692
hsa-mir-486-2_89891	3.7865	0.4109	0.1702
hsa-mir-30c-2_66049	5.4746	0.4095	0.1711
ENST00000387342.1_68849	-86.1589	0.4075	0.1725
RP11-317N8.1-001_181822	2.4062	0.4057	0.1738
hsa-mir-185_354564	6.3334	0.4051	0.1742
hsa-let-7c_188747	4.5174	0.4048	0.1744
hsa-mir-27b_127861	5.6411	0.4046	0.1746
hsa-mir-320a_387925	-7.1409	0.4046	0.1745
hsa-mir-126_336747	41.2099	0.4038	0.1751
ENST00000467525.5_81295	-9.5034	0.4027	0.1759
hsa-mir-23b_273824	23.2723	0.4025	0.176
hsa-mir-125a_12747	16.0227	0.4022	0.1762
hsa-mir-146a_138396	4.1913	0.4013	0.1769
hsa-mir-92a-2_151269	2.136	0.4005	0.1775
hsa-mir-26a-2_270108	-1.2638	0.4001	0.1777
hsa-mir-126_108517	2.611	0.4	0.1778
hsa-mir-126_175643	5.7814	0.4	0.1778
hsa-mir-340_147890	1.5861	0.3991	0.1784
hsa-mir-151a_89732	4.7314	0.3988	0.1787
hsa-mir-320a_59398	-1.4838	0.3983	0.179
ENST00000468083.1_199087	1.5562	0.3973	0.1797
hsa-mir-425_214645	-0.9613	0.3971	0.1798
RNY4P10-201_353533	153.263	0.3971	0.1798
hsa-mir-16-2_294786	2.828	0.3966	0.1802
hsa-mir-4446_320378	-21.375	0.3964	0.1804
ENST00000365208.1_57207	4.021	0.3949	0.1815
hsa-mir-320a_266752	-1.1408	0.3945	0.1818
hsa-mir-3615_380926	-21.6959	0.3945	0.1817
hsa-mir-409_336534	8.9183	0.394	0.1821
hsa-let-7g_388387	21.9359	0.394	0.1821
hsa-mir-654_105890	4.2482	0.3934	0.1825
hsa-mir-335_305724	90.778	0.3931	0.1828
hsa-mir-27b_318807	2.4144	0.3931	0.1828
hsa-mir-146a_91637	48.5435	0.3927	0.1831
hsa-mir-125a_16373	98.8568	0.3924	0.1833
hsa-mir-23b_302650	13.8486	0.3915	0.1839
hsa-mir-223_99263	1.6731	0.3877	0.1867
hsa-mir-342_290655	24.8974	0.3862	0.1878
hsa-let-7f-2_386158	-4.5238	0.3862	0.1878
hsa-mir-654_302105	34.3174	0.386	0.188
hsa-mir-3184_308332	5.4068	0.385	0.1887
hsa-mir-15a_53605	-6.3641	0.3849	0.1888
hsa-mir-320a_176483	-20.2296	0.3849	0.1888
hsa-mir-378a_3239	-1.6566	0.3846	0.189
hsa-mir-1273h_320492	-3.8535	0.3839	0.1895
hsa-mir-10b_103516	63.587	0.3829	0.1903
hsa-mir-92a-1_47756	2.6622	0.3816	0.1912
hsa-mir-337_76760	6.4345	0.3815	0.1913
hsa-mir-21_207515	-1.2334	0.381	0.1917
ENST00000387459.1_158374	-4.7593	0.3804	0.1922
hsa-mir-155_311817	23.3167	0.3799	0.1925
hsa-mir-27a_247659	7.1521	0.3798	0.1926
hsa-mir-181a-2_140600	-27.2361	0.3797	0.1927
hsa-mir-335_251728	30.5161	0.3792	0.193
hsa-mir-30e_35395	23.9038	0.3791	0.1931
hsa-mir-30d_211772	86.0884	0.3787	0.1935
hsa-mir-363_105467	9.9487	0.3782	0.1938
hsa-mir-130a_13434	-5.3172	0.3772	0.1946
hsa-mir-30d_319141	2.5175	0.3768	0.1949
hsa-mir-3184_244505	14.0446	0.3764	0.1952
hsa-mir-143_243317	21.1786	0.376	0.1955
hsa-mir-92a-2_34549	5.8935	0.3754	0.196
hsa-mir-30d_241217	84.9914	0.3751	0.1962
hsa-mir-92a-2_186498	29.6266	0.3749	0.1963
hsa-mir-21_18582	4.9676	0.3739	0.1971
hsa-mir-23a_207528	29.1824	0.3739	0.1971
hsa-mir-4433a_268823	-11.1304	0.3733	0.1976
hsa-mir-30c-2_281099	3.0909	0.3727	0.198
hsa-mir-576_22574	1.9571	0.3726	0.1981
hsa-mir-30a_155313	1.331	0.3712	0.1992
hsa-mir-150_12904	2.2606	0.3709	0.1994
hsa-mir-21_352952	1.4357	0.3709	0.1994
hsa-mir-1301_302781	7.2309	0.3706	0.1997
hsa-mir-532_25486	-3.6074	0.3704	0.1998
RP11-846F4.3-001_383667	-14.6385	0.3704	0.1998
hsa-mir-181b-2_269045	-2.5449	0.37	0.2001
RNY4-201_92446	23.3131	0.3692	0.2008
hsa-mir-23b_75879	19.9571	0.3686	0.2012
hsa-mir-484_261064	3.5958	0.3678	0.2018
hsa-mir-181a-2_27339	-2.2131	0.3677	0.2019
hsa-mir-186_162741	-1.9037	0.3677	0.2019
hsa-mir-10a_44529	98.8334	0.3666	0.2028
hsa-mir-142_46774	7.2652	0.3664	0.2029
hsa-mir-486-2_49054	24.0246	0.3649	0.2041
hsa-let-7g_162577	1.7007	0.3644	0.2045
hsa-mir-26a-2_370766	-3.465	0.3644	0.2045
hsa-mir-10a_224764	1.9267	0.3636	0.2052
tRNA-Lys-CTT-4-1_124198	-1.5171	0.3629	0.2057
hsa-mir-125b-1_317477	5.3257	0.3626	0.2059
hsa-mir-106b_389317	-4.5678	0.3625	0.206
RNY4P18-201_107978	-0.9846	0.3611	0.2071
hsa-mir-942_3568	5.3001	0.361	0.2072
hsa-mir-92a-1_209241	5.4215	0.361	0.2072
hsa-mir-155_295767	-4.2164	0.3603	0.2078
hsa-mir-27b_200569	1.1656	0.3591	0.2087
RNY4P14-201_313417	-2.9537	0.3591	0.2087
RP11-184I16.1-001_128082	4.6977	0.3586	0.2091
hsa-mir-505_85443	-1.5392	0.3583	0.2094
hsa-mir-27b_289617	48.1167	0.3582	0.2095
hsa-mir-23a_81573	6.3279	0.3579	0.2097
hsa-mir-26b_185583	-17.0134	0.3578	0.2098
hsa-mir-222_137871	12.9768	0.3576	0.21
hsa-mir-125a_298986	10.0206	0.357	0.2104
hsa-let-7a-1_165002	3.6602	0.3563	0.211
hsa-mir-30d_302449	3.2598	0.3556	0.2116
hsa-mir-17_151956	-6.5507	0.3552	0.2119
hsa-mir-335_199012	14.7005	0.3546	0.2123
hsa-mir-139_239740	1.4272	0.3545	0.2124
hsa-mir-26a-2_231466	-40.6568	0.3544	0.2125
hsa-mir-122b_164476	-34.3437	0.3538	0.213
hsa-mir-139_269208	2.1007	0.3536	0.2132
hsa-mir-30d_309605	6.3976	0.3534	0.2133
hsa-mir-409_150512	4.9391	0.3531	0.2136
RNY1P12-201_199154	1.8565	0.3531	0.2136
ENST00000445125.2_335781	1.6217	0.3523	0.2142
hsa-mir-1307_68733	-5.2927	0.3501	0.216
hsa-let-7a-1_250075	3.0623	0.3497	0.2164
hsa-mir-483_4669	-2.8592	0.3486	0.2173
RNY4-201_53290	1163.02	0.348	0.2178
hsa-mir-30d_131142	63.9665	0.348	0.2178
hsa-mir-130b_260172	-4.7337	0.3474	0.2182
hsa-mir-30d_308773	0.5372	0.3464	0.2191
hsa-mir-28_182090	-17.8787	0.3457	0.2197
hsa-let-7d_238696	18.0191	0.344	0.2211
hsa-mir-30a_206301	4.0102	0.3436	0.2214
RNY1-201_82698	-19.5069	0.3435	0.2215
hsa-mir-125a_134980	19.0697	0.3433	0.2217
hsa-mir-92a-1_211180	13.5312	0.3432	0.2218
hsa-mir-320a_54210	-3.99	0.3417	0.2231
RP11-846F4.3-001_108561	-4.3961	0.3405	0.224
hsa-mir-378a_335037	-11.473	0.3402	0.2243
hsa-mir-191_137776	6.481	0.34	0.2245
RP11-694I15.3-003_122763	12.2833	0.3397	0.2247
hsa-mir-324_232568	-3.9466	0.3397	0.2248
hsa-mir-224_2540	-1.2378	0.3393	0.2251
RNY4-201_113992	1.2661	0.339	0.2253
hsa-mir-199a-1_135505	-2.0596	0.3388	0.2255
hsa-mir-26a-2_229542	2.663	0.3384	0.2258
hsa-mir-223_239693	-1.0229	0.338	0.2262
hsa-mir-320a_220574	-5.7803	0.3373	0.2268
hsa-mir-320a_220237	-12.1335	0.3372	0.2269
hsa-mir-181b-1_62802	-4.0086	0.3361	0.2278
hsa-mir-99b_242329	15.5133	0.3361	0.2279
hsa-mir-30d_376452	1.5838	0.3358	0.228
hsa-mir-182_83446	-6.5733	0.3343	0.2294
hsa-mir-15a_196342	-6.9836	0.3341	0.2295
hsa-mir-330_56411	-4.3336	0.334	0.2296
RNY4-201_172354	98.7542	0.334	0.2296
hsa-mir-122b_179495	-12.2847	0.3338	0.2298
hsa-mir-320a_251627	-138.387	0.333	0.2305
hsa-mir-21_150353	403.399	0.3327	0.2308
hsa-mir-106b_119634	-1.9565	0.3323	0.2311
hsa-mir-181b-2_79402	-2.8901	0.3314	0.2319
hsa-mir-142_235814	111.357	0.3305	0.2326
hsa-mir-340_175921	4.3903	0.3297	0.2334
hsa-let-7a-1_251316	2.6091	0.3285	0.2344
hsa-mir-320a_349082	-7.6682	0.3285	0.2344
hsa-let-7d_383741	31.2555	0.3275	0.2353
hsa-mir-487b_370495	8.8803	0.3272	0.2355
hsa-mir-30d_113470	2.7111	0.3264	0.2363
hsa-mir-320a_233026	-1.5616	0.3264	0.2362
hsa-mir-345_263957	-1.6538	0.3257	0.2369
hsa-mir-10a_169639	23.0147	0.325	0.2375
hsa-mir-548j_176866	-1.9494	0.3249	0.2376
hsa-mir-21_118279	4.8003	0.3239	0.2385
hsa-mir-223_79240	1.1972	0.3238	0.2386
hsa-mir-92a-1_262441	3.1202	0.3236	0.2388
hsa-mir-425_147493	1.2355	0.3231	0.2392
hsa-let-7e_307590	1.6877	0.3231	0.2392
hsa-mir-425_312964	-7.0497	0.3227	0.2395
hsa-mir-125b-1_131790	14.6617	0.3226	0.2396
hsa-let-7d_254033	-1.7704	0.3219	0.2402
hsa-mir-92a-1_55913	99.7328	0.3217	0.2404
hsa-mir-486-2_387819	6.3712	0.3216	0.2405
hsa-let-7b_216734	57.0666	0.3212	0.2409
hsa-mir-192_350274	1.3624	0.321	0.2411
hsa-mir-1843_284923	-1.6689	0.3203	0.2417
hsa-mir-335_241675	4.203	0.3201	0.2419
hsa-mir-328_89631	-11.0669	0.3199	0.242
hsa-let-7d_357309	-3.4317	0.3199	0.2421
hsa-mir-26a-2_45394	-1.8967	0.3195	0.2424
hsa-mir-103b-1_349424	4.9987	0.318	0.2438
hsa-mir-191_20120	313.496	0.3179	0.2439
hsa-mir-3184_316542	-6.9482	0.3163	0.2453
hsa-mir-191_253879	22.0203	0.3162	0.2455
hsa-mir-21_30286	2.8723	0.316	0.2456
hsa-mir-29b-2_286213	3.8807	0.3159	0.2457
hsa-mir-664a_302786	8.0212	0.3157	0.2459
hsa-mir-421_380249	3.298	0.3152	0.2464
hsa-mir-23b_25389	43.0667	0.3143	0.2471
hsa-let-7g_217192	6.1519	0.314	0.2474
ENST00000445125.2_362594	4.1259	0.3138	0.2477
hsa-mir-23a_282670	498.493	0.3135	0.2479
RNY4P16-201_288146	11.3989	0.3129	0.2485
RP11-752G15.5-002_350775	-29.2174	0.3126	0.2487
hsa-mir-10b_300404	7.8936	0.312	0.2493
hsa-mir-30c-2_273163	23.1013	0.3118	0.2494
hsa-let-7b_231475	2.1383	0.3115	0.2498
hsa-mir-3615_193389	-1.2591	0.3114	0.2498
hsa-mir-199a-1_337750	-39.4691	0.3114	0.2498
hsa-mir-92a-1_389272	7.8477	0.3113	0.2499
hsa-mir-126_133141	1.5299	0.3109	0.2503
hsa-mir-221_223399	-16.0153	0.3084	0.2526
hsa-mir-10b_190341	3.8719	0.3081	0.2529
hsa-mir-378a_212659	-1.7226	0.3078	0.2531
hsa-mir-146a_56286	2.1877	0.3075	0.2535
RNY3-201_253702	-1.5525	0.3074	0.2535
hsa-mir-15b_358452	0.413	0.3072	0.2537
hsa-mir-320a_47918	-3.5918	0.3062	0.2547
hsa-mir-24-2_131159	4.6185	0.3055	0.2554
hsa-mir-486-2_138652	18.9544	0.3054	0.2554
hsa-mir-146a_183861	-1.6105	0.3049	0.2559
hsa-mir-486-2_24765	100.286	0.3048	0.256
hsa-mir-99b_21983	26.7592	0.3046	0.2562
hsa-mir-374c_67124	-126.402	0.3043	0.2565
hsa-mir-136_74608	7.037	0.304	0.2568
hsa-mir-101-1_35321	3.3921	0.3038	0.2569
hsa-mir-320a_10076	-40.756	0.3036	0.2572
hsa-mir-185_32536	-4.213	0.3034	0.2573
ENST00000387449.1_250244	10.786	0.3033	0.2574
hsa-mir-186_123637	1.9915	0.303	0.2577
hsa-mir-99b_362070	7.4137	0.303	0.2577
hsa-mir-30d_66019	28.1868	0.3028	0.2579
RNY4P10-201_220469	22.6193	0.3016	0.2591
hsa-mir-126_274372	3.9881	0.3016	0.259
hsa-mir-186_294232	2.8278	0.3006	0.26
hsa-mir-24-2_221992	41.8918	0.3004	0.2602
hsa-mir-23a_310408	334.164	0.2997	0.2608
hsa-mir-151a_341589	-3.0527	0.2994	0.2611
tRNA-Glu-CTC-1-7_41741	6.4305	0.2993	0.2612
hsa-mir-26b_35208	7.6177	0.299	0.2616
hsa-mir-3184_106639	771.771	0.2987	0.2618
hsa-mir-93_137706	-5.4679	0.2979	0.2626
hsa-let-7e_217768	5.5882	0.2976	0.2629
hsa-mir-92a-1_189169	1.0972	0.2975	0.263
hsa-mir-150_213722	0.8968	0.2974	0.2631
hsa-mir-23a_199622	34.4329	0.297	0.2634
hsa-mir-24-2_316019	74.4648	0.2968	0.2637
hsa-let-7b_270323	3.7872	0.2963	0.2641
RNY4P20-201_215136	10.1433	0.2957	0.2647
hsa-mir-3184_384283	9.485	0.2946	0.2658
hsa-mir-126_211738	5.6979	0.2938	0.2666
hsa-mir-224_74224	14.5626	0.2937	0.2667
hsa-mir-323a_370846	45.1175	0.2928	0.2676
hsa-mir-4433a_240937	-36.4597	0.2927	0.2676
RP11-247I13.2-005_177688	2.0482	0.2925	0.2678
hsa-mir-23a_246903	16.9707	0.2924	0.268
ENST00000365208.1_62654	3.1051	0.2923	0.268
hsa-mir-30d_341546	0.7478	0.2923	0.268
hsa-mir-30e_83087	2.0911	0.2922	0.2682
hsa-mir-140_317708	8.0605	0.292	0.2683
hsa-mir-23a_68435	15.8796	0.2916	0.2687
hsa-mir-221_56809	-1.4682	0.2913	0.269
hsa-let-7e_186169	1.6325	0.2909	0.2694
hsa-mir-425_59144	-5.6212	0.2907	0.2696
RNY3P2-201_299682	-4.4523	0.2905	0.2698
hsa-mir-10399_128854	-1.6665	0.2903	0.27
hsa-mir-22_369735	-2.2248	0.2902	0.2701
hsa-mir-12136_42680	-5.0475	0.2895	0.2708
hsa-let-7a-1_331959	2.348	0.2889	0.2714
hsa-mir-10b_113391	3.6968	0.2882	0.2721
hsa-mir-130b_114433	2.9593	0.288	0.2723
hsa-mir-486-2_305222	107.172	0.2874	0.2729
hsa-mir-320a_279540	-2.926	0.2872	0.2731
hsa-mir-409_276576	32.2246	0.2871	0.2731
RNY4P16-201_312063	28.7765	0.2869	0.2734
hsa-mir-26b_216762	-2.0219	0.2868	0.2735
hsa-mir-26a-2_192194	-1.475	0.2863	0.274
hsa-mir-128-1_97513	21.4857	0.2858	0.2745
hsa-mir-223_336348	-1.103	0.2858	0.2745
hsa-mir-409_93392	3.6419	0.2849	0.2754
RNY1-201_373291	2.6946	0.2848	0.2755
hsa-mir-320a_23159	-3.6683	0.2843	0.276
hsa-mir-574_170437	21.512	0.2829	0.2775
hsa-mir-223_244059	-21.7325	0.2829	0.2774
tRNA-Glu-TTC-2-2_94060	2.4513	0.2828	0.2775
hsa-mir-21_190634	-1.5923	0.2828	0.2775
hsa-mir-92a-2_216977	0.6243	0.2828	0.2775
hsa-mir-3184_40887	74.7762	0.2825	0.2779
hsa-mir-425_345566	-7.5309	0.2821	0.2782
hsa-mir-21_188500	-3.419	0.282	0.2783
hsa-mir-151a_255688	6.5884	0.2813	0.2791
hsa-mir-484_235708	15.7645	0.2809	0.2795
hsa-mir-221_167661	-122.954	0.2808	0.2796
hsa-mir-942_66178	5.8763	0.2803	0.28
hsa-mir-379_68424	8.9034	0.2803	0.2801
hsa-mir-99a_324028	11.6409	0.2802	0.2801
hsa-mir-1307_183568	-15.5419	0.2799	0.2804
hsa-mir-222_297526	3.6693	0.2797	0.2807
RNY4P16-201_92521	19.6992	0.2784	0.282
RP11-317N8.1-001_286209	2.7924	0.2779	0.2825
hsa-mir-126_26616	11.8167	0.2773	0.2831
RNY4P10-201_374647	10.1501	0.277	0.2834
hsa-mir-889_361112	37.6628	0.2765	0.284
hsa-mir-151a_61495	-2.7243	0.2763	0.2842
ENST00000364596.1_191437	1.2039	0.2758	0.2847
hsa-let-7b_239309	1.0243	0.2755	0.285
hsa-let-7b_279485	3.7039	0.275	0.2855
hsa-let-7e_20242	7.9988	0.2749	0.2856
hsa-mir-324_216570	-3.6555	0.2749	0.2856
hsa-let-7f-2_29186	1.6027	0.2744	0.2862
hsa-mir-10a_70039	29.5513	0.2743	0.2862
hsa-mir-93_87314	-167.006	0.2742	0.2864
hsa-mir-25_244339	35.2053	0.2734	0.2872
hsa-mir-382_284322	15.8075	0.2731	0.2874
hsa-mir-21_326357	40.1063	0.2731	0.2874
hsa-mir-27a_188194	5.7724	0.273	0.2876
hsa-mir-199a-1_4234	-12.6875	0.2721	0.2885
hsa-let-7f-2_76485	6.4639	0.2712	0.2895
hsa-mir-142_363694	26.0086	0.2709	0.2898
hsa-mir-409_54654	49.8463	0.2704	0.2903
hsa-let-7i_325262	-1.9945	0.27	0.2908
AC093401.1-001_230903	-1.3405	0.2698	0.2909
hsa-mir-182_301389	-5.7615	0.2697	0.291
ENST00000387372.1_94503	62.441	0.2696	0.2912
hsa-mir-3184_102770	260.868	0.2687	0.2921
hsa-mir-26a-2_101126	-3.702	0.2685	0.2923
hsa-let-7b_319125	8.828	0.2684	0.2925
hsa-mir-320c-1_389181	2.4084	0.2678	0.293
hsa-let-7e_20074	19.6286	0.2676	0.2933
hsa-mir-21_221815	3.9044	0.2675	0.2934
hsa-mir-20a_65565	1.041	0.2674	0.2935
hsa-mir-3615_202561	-3.1769	0.2673	0.2936
hsa-mir-140_194149	-1.6794	0.2671	0.2938
hsa-mir-99a_293058	6.0088	0.2671	0.2938
hsa-mir-140_122707	27.0057	0.267	0.2939
hsa-mir-92a-2_236612	5.8983	0.267	0.294
hsa-mir-25_149586	5.1806	0.2663	0.2946
hsa-let-7g_92501	2.4618	0.2659	0.2951
ENST00000387372.1_310098	10.5862	0.2659	0.2951
ENST00000387372.1_326872	10.234	0.2654	0.2956
hsa-mir-25_169999	1.7596	0.2645	0.2965
hsa-mir-30a_195930	7.1701	0.2642	0.2969
hsa-mir-409_357995	9.8207	0.2637	0.2974
hsa-let-7a-3_119603	-1.625	0.2626	0.2986
hsa-mir-186_165656	75.0285	0.2626	0.2986
hsa-mir-629_374173	5.7336	0.2626	0.2987
hsa-mir-30e_161068	-0.993	0.2623	0.299
hsa-mir-329-1_57770	43.2802	0.2622	0.299
hsa-mir-486-2_185380	5.0184	0.2619	0.2994
hsa-mir-574_357625	3.0721	0.2617	0.2996
tRNA-Glu-CTC-1-7_132304	-3.9001	0.2616	0.2996
hsa-let-7c_138439	8.346	0.2616	0.2997
hsa-mir-221_193556	1.8831	0.2604	0.301
hsa-mir-425_8847	-2.8906	0.26	0.3014
hsa-mir-26a-2_5249	-1.6256	0.2597	0.3018
hsa-mir-484_271349	4.1889	0.2593	0.3022
hsa-mir-320a_84334	-3.9698	0.2586	0.303
hsa-let-7b_93951	1.7027	0.2584	0.3032
hsa-mir-1307_235905	-1.2814	0.2571	0.3046
hsa-mir-22_251695	3.8828	0.2561	0.3057
hsa-mir-92a-1_360443	130.908	0.2561	0.3057
hsa-mir-21_329161	-3.7607	0.2545	0.3075
hsa-mir-27a_343656	5.0744	0.2542	0.3078
hsa-mir-181b-2_35370	-3.7311	0.2534	0.3087
hsa-mir-21_25940	2.1104	0.253	0.3091
hsa-mir-24-2_159701	667.052	0.2528	0.3094
hsa-mir-30b_179868	4.5284	0.2528	0.3094
hsa-mir-21_230757	24.0624	0.2528	0.3094
hsa-mir-342_304317	21.8843	0.2524	0.3098
RP11-645N11.2-002_141411	1.395	0.2523	0.31
ENST00000387449.1_91631	32.4861	0.2522	0.31
ENST00000387372.1_184135	6.9231	0.2518	0.3105
hsa-mir-146a_342650	38.5523	0.2516	0.3108
hsa-mir-1296_56308	-2.7174	0.2513	0.311
hsa-let-7d_351699	-58.7017	0.2513	0.311
hsa-mir-92a-1_191157	31.3471	0.2512	0.3112
hsa-mir-30d_261676	10.417	0.2511	0.3112
hsa-mir-493_346236	97.9313	0.2511	0.3113
RNY1-201_320329	5.0329	0.2509	0.3115
hsa-mir-425_374375	-2.5569	0.2509	0.3115
hsa-mir-3184_131420	14.1994	0.2503	0.3121
hsa-mir-181b-2_22160	1.2975	0.2502	0.3123
hsa-mir-374a_63760	2.4863	0.2502	0.3122
hsa-mir-126_50306	0.9171	0.2501	0.3124
hsa-mir-185_68917	4.461	0.2487	0.3139
hsa-mir-181d_251117	-3.4237	0.2485	0.3142
hsa-mir-3184_355412	-3.1044	0.2485	0.3142
hsa-mir-199a-1_45639	-21.0693	0.2482	0.3145
RNY4P23-201_292258	-5.4814	0.2482	0.3146
hsa-mir-486-2_293096	4.2579	0.2476	0.3152
hsa-mir-27b_309462	1.7473	0.2473	0.3155
hsa-mir-30d_359553	6.436	0.2469	0.3161
hsa-mir-329-1_252558	31.9493	0.2466	0.3164
hsa-mir-10a_22406	6.7863	0.2464	0.3166
hsa-mir-140_185995	119.851	0.2456	0.3175
hsa-let-7f-1_278589	-0.798	0.2452	0.318
hsa-mir-223_211261	1.0329	0.2448	0.3184
hsa-let-7f-2_298416	-1.8617	0.2448	0.3185
hsa-mir-671_204187	-0.9524	0.2446	0.3186
hsa-mir-487b_82745	11.3836	0.2444	0.3188
hsa-mir-27a_331029	3.1771	0.2432	0.3203
hsa-mir-10a_360093	4.7768	0.2426	0.3209
hsa-mir-484_136842	78.0474	0.2424	0.3211
hsa-mir-181b-2_63530	-2.067	0.2419	0.3217
hsa-mir-493_200222	18.6224	0.2416	0.322
RNY4P16-201_282944	25.8284	0.2416	0.3221
hsa-mir-381_297718	17.1609	0.2416	0.3221
hsa-mir-15b_310857	-73.5444	0.2415	0.3222
RNY4P10-201_153683	40.7524	0.2412	0.3226
hsa-mir-584_72613	9.7472	0.2409	0.3229
hsa-mir-132_322910	1.9882	0.2408	0.323
hsa-mir-93_248697	-1.1588	0.2401	0.3238
hsa-let-7g_315748	2.5403	0.2397	0.3243
hsa-mir-656_382486	15.3642	0.2395	0.3246
hsa-mir-28_200405	-64.8072	0.2392	0.3249
hsa-mir-222_216660	6.2532	0.2391	0.325
hsa-mir-3184_159349	4.5329	0.2389	0.3252
tRNA-Glu-CTC-1-7_319879	2.4	0.238	0.3263
hsa-let-7b_182431	162.496	0.2375	0.3268
hsa-mir-140_133198	4.1966	0.2374	0.3269
hsa-mir-30c-2_108673	6.0717	0.2372	0.3272
hsa-let-7e_166970	96.8622	0.2371	0.3273
hsa-mir-30d_319331	13.9844	0.2369	0.3276
hsa-mir-107_332923	-2.773	0.2363	0.3283
hsa-mir-3184_177888	18.5348	0.2362	0.3284
hsa-mir-152_271119	-4.2845	0.2362	0.3284
hsa-mir-2355_282122	-2.4885	0.236	0.3286
hsa-mir-877_306277	3.5573	0.2348	0.33
hsa-mir-26b_200310	-1.6432	0.2345	0.3304
hsa-mir-409_50698	4.1621	0.2343	0.3307
hsa-mir-30e_14650	-2.3286	0.2342	0.3307
hsa-mir-339_359493	2.6707	0.2342	0.3308
hsa-mir-199a-1_83010	-18.296	0.2336	0.3315
hsa-let-7f-2_52467	-1.7341	0.2332	0.3319
hsa-mir-186_382312	1.8784	0.2331	0.3321
hsa-mir-25_69758	-1.4066	0.2319	0.3335
hsa-mir-382_79913	3.2745	0.2316	0.3338
hsa-mir-99b_125450	67.3792	0.2315	0.334
hsa-mir-122b_82585	-37.0273	0.2314	0.3341
hsa-mir-136_221457	6.6624	0.231	0.3346
hsa-mir-411_223555	13.8611	0.2308	0.3348
hsa-mir-140_122744	25.9738	0.2305	0.3351
hsa-let-7a-3_37445	-2.45	0.2289	0.3371
ENST00000363120.1_155903	2.8287	0.2288	0.3373
hsa-mir-30d_148735	1.4637	0.2286	0.3375
RNY4-201_139058	5.2405	0.2285	0.3376
hsa-let-7a-1_177168	6.3127	0.2284	0.3377
hsa-mir-30a_148664	1.3108	0.2276	0.3387
hsa-mir-152_187713	-15.7332	0.2275	0.3388
hsa-mir-223_116964	1.3409	0.2273	0.3391
hsa-let-7d_338544	-21.1553	0.2271	0.3393
hsa-mir-21_156477	2.3877	0.2264	0.3401
hsa-mir-25_286399	0.7249	0.2264	0.3401
hsa-mir-409_149220	19.3223	0.2263	0.3402
hsa-mir-92a-2_262162	0.8943	0.2256	0.3412
hsa-mir-532_230143	-16.6517	0.225	0.3419
hsa-mir-30d_44397	2.4491	0.2249	0.342
hsa-mir-23b_325328	2.3145	0.2247	0.3422
hsa-mir-494_1260	46.9518	0.2244	0.3426
hsa-mir-20a_87860	-24.5697	0.2241	0.3429
hsa-let-7b_174912	0.6916	0.2241	0.3429
hsa-let-7a-1_233712	1.7696	0.2241	0.3429
hsa-mir-128-1_74369	0.8635	0.224	0.3431
hsa-mir-24-1_231777	0.9494	0.2236	0.3436
hsa-let-7i_249774	-64.9413	0.2236	0.3436
hsa-mir-543_93913	22.2344	0.2235	0.3437
hsa-mir-222_250888	1	0.2234	0.3438
hsa-mir-150_119626	7.1952	0.2233	0.3439
hsa-mir-224_1066	31.3588	0.2229	0.3444
hsa-let-7g_249543	3.5541	0.2228	0.3446
hsa-mir-26a-2_265379	2.0447	0.2221	0.3454
hsa-mir-21_207987	0.8289	0.222	0.3456
hsa-mir-186_25085	-31.3054	0.2217	0.3459
hsa-mir-150_360390	1.2149	0.2212	0.3465
RP11-846F4.3-001_316474	-1.624	0.2211	0.3466
hsa-mir-223_31988	2.7919	0.2207	0.3472
hsa-let-7a-1_337648	12.6841	0.2207	0.3472
hsa-mir-20a_351079	-1.7565	0.2207	0.3471
hsa-mir-1908_52801	-8.5654	0.2204	0.3475
hsa-mir-411_75002	7.4758	0.2203	0.3476
hsa-mir-3184_88027	4.5066	0.2201	0.3479
hsa-let-7b_369729	131.681	0.2199	0.3481
hsa-mir-101-1_340065	1.7348	0.2193	0.3489
hsa-mir-487b_379702	14.2522	0.219	0.3493
RP11-752G15.5-002_70492	-13.4172	0.2185	0.3499
hsa-mir-98_5708	1.4087	0.2171	0.3517
hsa-mir-369_24316	131.763	0.2167	0.3521
hsa-mir-493_383039	12.3701	0.2156	0.3536
hsa-mir-140_35439	26.3462	0.2154	0.3539
hsa-mir-652_128503	118.795	0.2154	0.3538
hsa-let-7a-1_257958	3.6057	0.2153	0.354
hsa-mir-146a_258540	8.0751	0.2153	0.3539
hsa-mir-98_100994	4.8278	0.2149	0.3544
hsa-mir-126_269354	-4.6567	0.2149	0.3544
ENST00000410717.1_242635	-5.1688	0.2147	0.3547
hsa-mir-30d_326166	0.0938	0.2135	0.3562
ENST00000410717.1_283120	-11.1979	0.2128	0.3571
hsa-mir-126_152960	-13.2295	0.2126	0.3574
hsa-let-7d_88215	9.3887	0.2123	0.3577
hsa-mir-376a-1_114111	3.9115	0.2122	0.3579
hsa-let-7a-1_357992	9.0202	0.2122	0.3579
hsa-mir-199a-1_198796	10.7505	0.212	0.3582
hsa-let-7b_144414	5.175	0.2119	0.3582
hsa-mir-126_329336	0.9976	0.2119	0.3582
hsa-mir-151a_371441	2.4543	0.2115	0.3588
hsa-mir-21_216457	-86.8079	0.2113	0.3591
hsa-let-7g_166814	1.9665	0.2111	0.3593
hsa-mir-185_300140	-5.5687	0.2111	0.3594
hsa-mir-361_210751	2.8301	0.2108	0.3597
hsa-mir-328_94436	-1.5942	0.2107	0.3599
hsa-mir-361_3222	5.0266	0.2105	0.3601
hsa-mir-223_130986	5.3785	0.2103	0.3604
hsa-mir-323a_160948	42.3366	0.2102	0.3605
hsa-mir-25_2368	6.4102	0.2095	0.3613
hsa-let-7f-2_179759	0.7582	0.2095	0.3614
RP13-554M15.1-001_145841	3.7026	0.2092	0.3618
hsa-mir-409_54713	144.343	0.2091	0.3619
hsa-mir-320a_232688	-4.4825	0.2091	0.3619
hsa-mir-26b_166478	1.8633	0.2084	0.3629
hsa-mir-30d_46731	5.3626	0.2082	0.3631
hsa-mir-127_88319	8.7053	0.2077	0.3637
CTD-2083E4.1-002_54147	3.3032	0.2075	0.364
hsa-mir-339_123896	-1.3539	0.2072	0.3644
hsa-mir-95_211780	8.6818	0.2069	0.3648
hsa-mir-425_86678	-153.487	0.2067	0.365
hsa-mir-320a_218042	-13.4765	0.2064	0.3654
hsa-mir-142_188517	3.2723	0.2061	0.3658
hsa-mir-30a_109525	1.5569	0.2059	0.366
hsa-mir-424_64670	3.166	0.2057	0.3664
hsa-mir-101-1_291405	11.1309	0.2057	0.3664
hsa-mir-505_101149	-5.7799	0.2056	0.3664
hsa-mir-30a_236326	63.9065	0.2056	0.3665
hsa-mir-487b_172009	106.498	0.2055	0.3666
hsa-mir-10a_151108	12.1555	0.2053	0.3668
RNY4P23-201_215724	-0.6732	0.2042	0.3683
hsa-mir-103a-1_385274	-2.0134	0.204	0.3685
hsa-mir-339_164031	-1.5128	0.2039	0.3687
hsa-mir-487b_54746	31.466	0.2037	0.3689
hsa-mir-21_295217	1684.48	0.2035	0.3692
hsa-mir-140_350005	-1.0113	0.2034	0.3694
hsa-mir-425_52194	-1.8883	0.2032	0.3696
hsa-let-7b_262166	15.1719	0.203	0.37
hsa-mir-26a-2_317582	-2.672	0.2028	0.3701
hsa-mir-6511a-4_175927	3.1045	0.2021	0.371
hsa-mir-92a-1_77925	1.8651	0.2019	0.3714
ENST00000445125.2_160246	2.7595	0.2018	0.3715
ENST00000445125.2_269959	16.7666	0.2018	0.3716
hsa-mir-1307_175765	-13.8918	0.2009	0.3727
hsa-mir-126_238497	3.8284	0.2009	0.3727
hsa-mir-382_357884	104.81	0.2004	0.3734
hsa-mir-16-1_137057	-1.1085	0.2002	0.3736
hsa-let-7i_343580	3.344	0.2002	0.3736
hsa-mir-320a_387067	-25.9538	0.1993	0.3748
hsa-mir-30c-2_109025	-1.9227	0.1988	0.3755
hsa-mir-26b_270786	-1.0541	0.1988	0.3756
hsa-mir-382_144952	36.3741	0.1986	0.3758
hsa-mir-24-2_246555	2.7553	0.1986	0.3757
hsa-mir-10a_148343	9.0634	0.1983	0.3761
hsa-mir-25_92510	1.0059	0.198	0.3765
hsa-mir-543_238522	3.1699	0.1976	0.3772
RNY4P20-201_269039	-0.8408	0.1974	0.3775
hsa-mir-486-2_276514	2.9737	0.1964	0.3788
hsa-mir-550b-2_69148	7.1959	0.1963	0.3789
RP11-18O13.1-004_115585	4.9283	0.1962	0.379
hsa-let-7a-1_78189	18.6237	0.1957	0.3797
hsa-mir-409_288599	17.0536	0.1953	0.3802
hsa-let-7g_59981	0.7051	0.1952	0.3804
hsa-mir-128-1_208597	75.4597	0.1952	0.3804
hsa-mir-223_57423	-3.7455	0.1951	0.3805
hsa-mir-223_109940	3.1572	0.1951	0.3806
hsa-let-7f-2_197457	-0.9334	0.195	0.3807
hsa-mir-99b_233957	7.6895	0.1946	0.3812
hsa-mir-92b_353015	3.3375	0.1945	0.3814
hsa-let-7d_189652	-336.501	0.1943	0.3816
ENST00000387400.1_3859	-2.6518	0.1942	0.3817
hsa-mir-30d_225885	2.3456	0.194	0.382
hsa-mir-29a_270128	7.2554	0.1935	0.3827
hsa-mir-505_257179	-0.8333	0.1932	0.3832
hsa-mir-101-1_97704	5.4813	0.1929	0.3835
hsa-mir-6741_100105	-3.4001	0.1914	0.3856
hsa-mir-140_109124	-3.2428	0.1914	0.3856
RNY4-201_25199	-9.4535	0.1901	0.3875
hsa-mir-222_360567	6.0253	0.19	0.3875
hsa-mir-223_275125	14.0923	0.1899	0.3877
hsa-mir-21_129437	-731.632	0.1897	0.388
RP3-481F12.6-001_296261	-15.4084	0.1897	0.388
ENST00000364596.1_181554	-1.0698	0.1894	0.3884
hsa-mir-2110_317216	4.9041	0.1892	0.3887
hsa-mir-9-2_319325	1.4551	0.1889	0.3891
hsa-mir-486-2_67372	4.3955	0.1886	0.3895
hsa-mir-24-2_190898	-17.2658	0.1886	0.3895
hsa-mir-151a_217266	-173.233	0.1885	0.3897
hsa-mir-221_10849	-10.0626	0.1878	0.3907
hsa-mir-151a_132752	-24.5975	0.1878	0.3906
hsa-mir-21_11958	0.8033	0.1875	0.3911
hsa-mir-376c_227711	9.5039	0.1874	0.3912
hsa-let-7i_129910	1.1898	0.1872	0.3915
hsa-mir-150_361602	3.1913	0.1863	0.3928
hsa-mir-431_101787	35.8279	0.1862	0.3929
hsa-mir-20a_386050	-5.6337	0.186	0.3932
hsa-mir-26b_227170	-107.165	0.1857	0.3937
hsa-mir-126_365762	5.1254	0.1855	0.3939
hsa-mir-196b_244690	-3.3108	0.1854	0.394
hsa-mir-30e_20641	-17.4033	0.1852	0.3943
hsa-mir-532_25811	-1.1329	0.185	0.3947
hsa-mir-432_6834	15.6719	0.1842	0.3958
hsa-mir-196b_10816	-4.7615	0.1836	0.3967
hsa-mir-199a-1_277816	9.4886	0.1836	0.3965
hsa-mir-432_294000	90.2294	0.1833	0.3971
hsa-mir-30c-2_5252	3.4457	0.183	0.3975
hsa-mir-92a-1_157430	98.6839	0.1829	0.3976
hsa-mir-146b_322274	31.4777	0.1828	0.3977
hsa-mir-3184_370712	2.5341	0.1822	0.3986
hsa-mir-339_387678	-1.402	0.1821	0.3988
hsa-let-7a-1_41176	6.4433	0.182	0.3989
hsa-let-7b_162540	3.1907	0.1815	0.3996
hsa-mir-185_211019	-0.9473	0.1814	0.3997
hsa-mir-27b_190106	55.5102	0.1813	0.3999
hsa-mir-24-2_15470	1.6128	0.1809	0.4005
hsa-mir-574_253984	2.3504	0.1807	0.4007
hsa-mir-24-2_222759	-1.0335	0.1805	0.4011
hsa-mir-146b_293150	30.875	0.1804	0.4012
hsa-mir-106b_27972	2.2663	0.1797	0.4022
RP11-317N8.1-001_121095	4.1163	0.1793	0.4028
hsa-mir-340_345456	50.954	0.1789	0.4034
hsa-mir-26a-2_132755	-0.4138	0.1783	0.4043
hsa-let-7f-2_16319	1.8479	0.1782	0.4043
hsa-mir-21_84532	-1.6303	0.1781	0.4045
tRNA-Glu-CTC-1-7_102180	9.4156	0.1781	0.4045
hsa-mir-942_151088	-3.331	0.1781	0.4046
RNY4P23-201_358216	26.2501	0.1776	0.4053
hsa-mir-181b-2_174010	-1.5199	0.1772	0.4058
hsa-mir-339_285870	1.654	0.1772	0.4059
hsa-mir-92a-1_327593	82.5822	0.1765	0.4068
hsa-mir-26a-2_138478	-1.6535	0.1764	0.407
hsa-mir-200c_82018	-2.2602	0.1762	0.4073
hsa-mir-22_249460	6.8933	0.1761	0.4075
ENST00000631292.1_378204	3.9824	0.1759	0.4078
hsa-mir-146a_296255	0.6224	0.1758	0.4079
hsa-mir-425_21609	1.8153	0.1747	0.4095
hsa-mir-654_370409	53.6221	0.1743	0.4101
hsa-mir-425_184806	-67.1478	0.1742	0.4103
hsa-let-7d_374627	106.105	0.1742	0.4103
hsa-mir-24-2_169661	-1.1494	0.1738	0.4109
RNY4P10-201_177569	478.4	0.1738	0.4109
SMC1A-202_210660	4.8824	0.1737	0.411
hsa-mir-487b_270677	25.8396	0.173	0.4121
hsa-mir-30a_86612	5.0703	0.1727	0.4125
hsa-mir-29a_212590	-3.3021	0.1725	0.4128
hsa-mir-26b_293809	-886.638	0.1719	0.4137
hsa-mir-26a-2_388644	-2.3075	0.1717	0.414
hsa-mir-221_33128	3.8915	0.1716	0.4142
hsa-mir-28_150223	-1.8291	0.1711	0.4149
hsa-mir-30a_275642	0.7015	0.1708	0.4154
hsa-mir-29b-2_242071	-2.4659	0.1707	0.4155
hsa-mir-142_158287	7.5777	0.1706	0.4157
RNY4P18-201_341754	-1.3309	0.1702	0.4162
hsa-mir-221_329603	-114.232	0.1701	0.4165
hsa-mir-26a-2_158714	-118.801	0.17	0.4166
hsa-mir-27a_35857	11.008	0.1699	0.4168
hsa-mir-146a_383110	6.5368	0.1697	0.4171
hsa-mir-92b_38655	3.2255	0.1696	0.4172
hsa-mir-345_48371	-1.3713	0.1696	0.4172
hsa-mir-342_37534	4.6797	0.1689	0.4183
hsa-mir-21_66709	-2.4474	0.1689	0.4183
hsa-mir-320a_34567	-0.8698	0.1688	0.4184
hsa-mir-942_296302	-0.8894	0.1686	0.4187
hsa-let-7g_4469	5.9966	0.1685	0.4189
hsa-mir-10b_254995	106.037	0.1684	0.4189
hsa-mir-155_385343	-3.1152	0.1683	0.4191
hsa-mir-26a-2_207010	1.3834	0.1682	0.4193
hsa-mir-92a-2_275239	6.9192	0.1681	0.4194
RNY4-201_379762	-1.0969	0.1681	0.4194
hsa-mir-181a-2_335893	-0.9121	0.1672	0.4208
hsa-let-7g_253580	7.0033	0.1671	0.421
hsa-mir-340_9282	3.1882	0.167	0.4211
hsa-mir-30d_334124	1.4803	0.1668	0.4215
hsa-mir-92a-2_184400	10.416	0.1664	0.4221
hsa-mir-655_330438	3.2708	0.1663	0.4222
hsa-mir-1908_284186	-2.0178	0.166	0.4226
hsa-let-7a-1_197117	296.831	0.1656	0.4233
hsa-mir-30c-2_69222	-0.3125	0.1655	0.4234
hsa-let-7a-1_49271	144.108	0.1654	0.4236
ENST00000500358.6_27491	6.9451	0.1653	0.4237
hsa-mir-24-2_137942	5.9149	0.1652	0.4239
hsa-mir-181a-2_292851	-3.3147	0.1652	0.4239
hsa-mir-21_252221	13.8107	0.165	0.4241
tRNA-Leu-CAG-2-2_88942	0.9786	0.1645	0.4249
hsa-mir-181a-1_291010	-3.3224	0.1642	0.4254
hsa-mir-486-2_323804	1.738	0.1638	0.426
hsa-mir-148b_328140	-1.5181	0.1637	0.4263
hsa-mir-433_55275	14.3144	0.1631	0.4272
hsa-mir-92a-1_209375	32.4755	0.1629	0.4274
hsa-mir-30a_288499	17.8126	0.1626	0.428
hsa-mir-92a-1_128436	2.8698	0.1625	0.4282
hsa-mir-30d_88064	0.8289	0.162	0.4288
hsa-mir-92a-1_278263	1.7608	0.1616	0.4296
hsa-mir-3615_162933	-1.2895	0.161	0.4304
hsa-mir-361_17298	11.2799	0.1609	0.4306
hsa-mir-125b-1_374809	2.8632	0.1608	0.4307
RNY4P10-201_382259	-23.2185	0.1607	0.4309
RNY3-201_227725	-0.9537	0.1605	0.4312
hsa-mir-486-2_50017	6.6741	0.1604	0.4313
hsa-mir-320a_307805	-1.9744	0.1597	0.4325
hsa-mir-495_188734	15.1924	0.1593	0.4332
hsa-mir-10b_40203	4.2546	0.159	0.4336
hsa-mir-126_192882	32.8247	0.1589	0.4337
ENST00000362765.1_212617	1.6352	0.1586	0.4343
hsa-mir-199a-1_335914	-2.8157	0.1585	0.4344
hsa-mir-382_142810	7.1041	0.1582	0.4348
RP13-554M15.1-001_262444	5.8734	0.1582	0.4348
hsa-mir-140_63300	4.9633	0.158	0.4352
hsa-let-7g_91939	-0.4931	0.1574	0.436
RP11-694I15.3-003_228850	5.67	0.1574	0.4362
RNY4-201_81587	2.9399	0.1571	0.4366
hsa-let-7i_288065	-3.6169	0.157	0.4367
hsa-mir-361_209826	0.9637	0.1566	0.4374
hsa-mir-142_275800	1.1259	0.1566	0.4374
RNY4P10-201_149024	2.0543	0.1561	0.4382
hsa-let-7f-2_4260	3.5849	0.1558	0.4386
hsa-mir-16-1_32936	12.1536	0.1554	0.4393
ENST00000387400.1_181210	4.9626	0.155	0.44
hsa-mir-320b-1_144562	-3.3002	0.1547	0.4405
hsa-mir-425_2291	-4.3346	0.1546	0.4406
ENST00000410794.1_314086	25.0311	0.1544	0.441
hsa-let-7f-2_275609	223.257	0.1543	0.4411
hsa-mir-331_55989	0.952	0.1541	0.4414
hsa-mir-30d_145345	2.6146	0.1538	0.4419
hsa-mir-140_161257	8.3026	0.1538	0.442
hsa-mir-320a_186451	-2.046	0.1528	0.4435
hsa-mir-27b_229390	5.3773	0.1527	0.4437
RP11-694I15.3-001_88136	1.8004	0.1525	0.4439
ENST00000500358.6_132058	2.1517	0.1521	0.4447
ENST00000416946.1_138916	-22.9894	0.1521	0.4447
hsa-mir-340_355700	1.7911	0.1518	0.4451
hsa-mir-185_279082	2.2363	0.1514	0.4457
hsa-mir-410_282457	11.3643	0.1506	0.4471
hsa-mir-21_369611	1.9074	0.1503	0.4477
hsa-mir-320a_1508	-2.2087	0.1502	0.4478
ENST00000500358.6_53779	5.7071	0.1501	0.4479
hsa-mir-3184_324039	18.5695	0.1499	0.4483
hsa-mir-484_49919	16.3583	0.1498	0.4484
hsa-mir-26a-2_315236	-2.5553	0.1498	0.4485
hsa-mir-127_48620	5.6072	0.1491	0.4496
hsa-mir-425_160545	-0.6786	0.1489	0.4499
hsa-mir-148a_279234	-1.6621	0.1488	0.4501
RNY4-201_300532	-56.1289	0.1488	0.45
hsa-mir-495_228651	1.0035	0.1486	0.4504
hsa-mir-28_292873	-8.0908	0.1484	0.4508
hsa-mir-98_10748	0.9944	0.148	0.4515
RNY4P23-201_16980	-0.7033	0.148	0.4514
hsa-mir-379_62170	72.2785	0.1477	0.4519
hsa-mir-199a-1_176254	-1.469	0.1474	0.4524
hsa-mir-30d_283461	725.506	0.1473	0.4525
hsa-mir-155_31202	1.0205	0.1469	0.4533
hsa-mir-146b_208063	6.3157	0.146	0.4547
hsa-mir-485_68428	6.0545	0.1456	0.4554
hsa-mir-10b_163854	3.8196	0.1452	0.456
hsa-mir-421_189811	-5.261	0.1451	0.4562
hsa-mir-3184_363293	8.3024	0.1451	0.4563
hsa-mir-93_342577	-35.4361	0.1448	0.4568
RNY4P6-201_381130	-0.9578	0.1447	0.4569
hsa-mir-342_29159	-2.4335	0.1446	0.457
hsa-mir-186_102312	1.505	0.1444	0.4574
hsa-let-7b_179434	3.0023	0.1437	0.4587
hsa-mir-221_251346	-63.4058	0.1433	0.4593
hsa-mir-342_360573	2.4703	0.1433	0.4594
hsa-mir-126_100268	1.7119	0.1431	0.4596
hsa-mir-191_210740	85.3366	0.143	0.4599
hsa-mir-106b_31535	-11.5966	0.1428	0.4602
hsa-mir-484_313722	3.7335	0.1428	0.4602
hsa-mir-26a-2_132631	-1.0739	0.1426	0.4605
hsa-let-7b_71612	5.5696	0.1415	0.4624
ENST00000387449.1_129504	2.4676	0.1412	0.4628
hsa-mir-486-2_20750	21.3228	0.141	0.4632
hsa-mir-125b-1_6739	5.7186	0.1407	0.4638
hsa-mir-142_88238	2.8047	0.1404	0.4642
hsa-mir-21_63219	1.9204	0.1399	0.4651
hsa-mir-223_285165	6.4685	0.1399	0.4651
hsa-mir-140_21101	4.5172	0.1396	0.4656
hsa-mir-26a-2_214755	-8.0974	0.1396	0.4656
hsa-mir-21_335809	1.8098	0.1396	0.4657
hsa-mir-26a-2_222570	-18.5012	0.1395	0.4657
tRNA-Glu-TTC-2-2_240958	0.8006	0.1384	0.4677
hsa-mir-101-1_108475	25.567	0.1383	0.468
hsa-let-7f-2_206938	1.9339	0.1379	0.4686
hsa-mir-142_94181	2.7252	0.137	0.4701
hsa-mir-942_264580	-2.5301	0.1369	0.4704
hsa-mir-223_340143	-5.7735	0.1366	0.4708
hsa-mir-505_317694	-1.8264	0.1362	0.4716
hsa-mir-369_336093	2.9641	0.1361	0.4717
RNY1-201_135799	3.3685	0.136	0.4719
hsa-mir-4433a_369930	-19.1604	0.1359	0.4721
hsa-mir-32_36600	4.7259	0.1358	0.4722
hsa-mir-186_39204	-6.6835	0.1356	0.4725
RNY4P18-201_67247	-0.8544	0.1355	0.4727
hsa-mir-92a-1_130206	-1.1311	0.1353	0.4731
hsa-mir-150_172951	0.9395	0.1352	0.4733
hsa-mir-142_55632	1.9995	0.135	0.4737
hsa-mir-30e_260937	-0.6135	0.1339	0.4756
hsa-mir-181a-2_357750	-1.92	0.1339	0.4756
hsa-mir-431_86737	52.1912	0.1337	0.476
hsa-mir-99b_255851	-1.279	0.1335	0.4763
hsa-mir-21_369532	-0.6903	0.1335	0.4763
hsa-mir-142_174090	-3.6981	0.1332	0.4769
hsa-mir-370_210217	4.689	0.133	0.4773
hsa-mir-222_333439	2.2928	0.1329	0.4773
hsa-mir-337_197291	4.6647	0.1326	0.478
hsa-let-7e_218969	2.8289	0.1325	0.4781
hsa-let-7d_275847	-28.632	0.1324	0.4783
hsa-let-7f-2_311800	-0.573	0.1324	0.4783
hsa-mir-130b_92768	-4.5213	0.1323	0.4785
hsa-mir-223_158608	-46.2324	0.132	0.479
SMC1A-202_186134	7.0666	0.1319	0.4792
hsa-mir-146a_97502	45.0456	0.1318	0.4793
hsa-let-7d_25116	15.8218	0.131	0.4809
hsa-mir-146a_240660	1.8182	0.1309	0.4809
ENST00000445125.2_361331	1.7675	0.1307	0.4813
hsa-mir-320c-1_243516	-1.1492	0.1305	0.4817
hsa-mir-22_17192	-2.8563	0.1303	0.482
hsa-let-7b_173136	-1.7773	0.1303	0.4821
hsa-mir-92a-1_221468	19.776	0.1303	0.482
hsa-mir-26b_140684	0.8725	0.1299	0.4827
RNY4P10-201_116166	-11.7488	0.1292	0.4841
hsa-mir-140_32850	1.3534	0.1286	0.4851
hsa-mir-342_202301	0.5641	0.1286	0.4852
hsa-mir-323b_203221	68.6641	0.128	0.4863
hsa-mir-92a-1_261493	1.5487	0.1277	0.4868
hsa-mir-3615_276526	0.6182	0.1277	0.4868
hsa-mir-200c_81015	-1.6615	0.1276	0.4869
hsa-mir-142_94204	-1.5474	0.1276	0.487
hsa-mir-128-1_185158	1.2766	0.1274	0.4873
hsa-mir-26b_355155	-0.6469	0.1272	0.4878
hsa-let-7b_285339	0.8706	0.1268	0.4884
hsa-mir-199a-1_309133	-46.1967	0.1268	0.4885
hsa-mir-223_166714	-5.2	0.1267	0.4887
hsa-mir-484_61622	10.4683	0.1262	0.4895
hsa-mir-320a_243093	-5.9205	0.1262	0.4895
hsa-mir-140_96810	12.1669	0.1261	0.4897
hsa-mir-151a_135844	111.573	0.1261	0.4896
hsa-mir-146a_387114	-7.1372	0.1251	0.4917
hsa-mir-223_367280	-0.9357	0.125	0.4917
hsa-mir-375_149617	0.6529	0.1247	0.4924
hsa-mir-148a_23323	90.3292	0.1245	0.4927
hsa-mir-194-1_388745	1.7009	0.1242	0.4932
RP11-694I15.3-003_255096	5.6906	0.124	0.4935
hsa-mir-222_276581	1.0398	0.1238	0.4939
hsa-let-7b_312702	164.633	0.1236	0.4943
hsa-mir-339_246894	-1.0826	0.1233	0.4949
hsa-mir-92a-1_295411	2.0944	0.1233	0.495
hsa-mir-92a-2_70875	2.5703	0.1232	0.4951
hsa-mir-486-2_34183	-2.1199	0.1228	0.4959
hsa-mir-486-2_173213	7.0906	0.1227	0.4961
hsa-mir-486-2_271985	5.6548	0.1226	0.4962
hsa-mir-24-2_296035	1.5117	0.1222	0.4969
hsa-mir-21_268033	-3.9054	0.1219	0.4975
hsa-mir-146b_354351	90.5242	0.1218	0.4978
hsa-mir-122b_271490	-11.5819	0.1217	0.498
hsa-mir-1307_62707	-1.7314	0.1212	0.4988
hsa-mir-409_234067	41.5014	0.1205	0.5001
hsa-mir-409_70991	5.6034	0.1204	0.5003
hsa-mir-16-2_293401	2.2816	0.1202	0.5008
hsa-mir-576_15162	2.3568	0.1196	0.5019
hsa-mir-652_177032	-6.6503	0.1193	0.5026
hsa-mir-221_297165	1.1281	0.1193	0.5025
hsa-mir-140_46766	22.1543	0.1182	0.5047
hsa-mir-320a_298121	-6.8363	0.118	0.5051
hsa-mir-320a_99290	-2.4054	0.1179	0.5051
hsa-mir-181d_35369	-1.149	0.1176	0.5057
hsa-mir-181c_148844	-3.0014	0.1176	0.5058
hsa-mir-26b_256763	1.0408	0.1169	0.507
CTD-2083E4.1-002_128732	1.6872	0.1168	0.5072
hsa-mir-486-2_10941	-28.4312	0.1166	0.5077
RNY4P10-201_75849	-4.6372	0.1163	0.5083
hsa-mir-486-2_352405	2.7095	0.1163	0.5082
hsa-mir-340_353495	-9.2057	0.1163	0.5083
RP11-694I15.3-001_326385	4.9515	0.1161	0.5086
hsa-let-7g_252247	4.8617	0.116	0.5089
hsa-let-7g_183744	-2.0567	0.1149	0.511
hsa-mir-16-1_319390	0.9678	0.1145	0.5119
hsa-let-7i_66086	7.5287	0.1144	0.512
hsa-mir-484_68837	31.5932	0.1141	0.5125
hsa-let-7c_77183	2.4135	0.114	0.5128
hsa-mir-92a-2_202089	1.0762	0.1138	0.5131
hsa-mir-223_213	2.2117	0.1137	0.5133
hsa-mir-532_242003	2.5212	0.1136	0.5135
RP11-215L17.2-001_294643	-1.9516	0.1131	0.5145
hsa-mir-223_212919	-114.981	0.1129	0.5149
hsa-mir-486-2_327529	-8.9661	0.1121	0.5165
hsa-mir-543_380813	12.1369	0.1121	0.5166
hsa-mir-181a-2_31583	-17.3029	0.1119	0.517
RP11-694I15.3-001_387798	3.0946	0.1114	0.5179
hsa-mir-223_292828	-3.3327	0.1112	0.5183
hsa-let-7a-1_51079	1.1392	0.1111	0.5186
hsa-mir-146b_324259	2.8591	0.1109	0.519
hsa-mir-369_57641	5.9422	0.1108	0.5191
hsa-mir-221_246078	-1.6713	0.1108	0.5191
ENST00000416946.1_362172	-35.1117	0.1107	0.5194
hsa-mir-127_217052	5.5168	0.1106	0.5196
hsa-mir-185_185577	-2.4545	0.1105	0.5198
hsa-mir-1307_344392	0.6801	0.1105	0.5197
RP11-469L3.1-001_187269	0.951	0.1095	0.5217
ENST00000363120.1_344251	3.087	0.1095	0.5218
RNY3-201_111402	2.1499	0.1093	0.5221
hsa-mir-92a-2_218300	3.3065	0.1093	0.5222
hsa-mir-4433a_311899	-3.3096	0.1092	0.5223
hsa-mir-155_121977	6.3053	0.1083	0.5241
hsa-mir-3184_114634	0.4194	0.1082	0.5244
hsa-mir-1908_147927	-2.261	0.1081	0.5247
hsa-let-7a-1_170849	2.1984	0.108	0.5249
hsa-mir-223_298942	-16.3531	0.1079	0.5249
tRNA-Leu-CAG-2-2_309767	7.6377	0.1076	0.5256
RNY4P16-201_63661	9.9205	0.1072	0.5264
hsa-mir-26b_197173	15.2824	0.1072	0.5264
hsa-mir-26a-1_20290	-1.6677	0.1064	0.528
hsa-mir-199a-1_116289	1.447	0.1062	0.5285
hsa-mir-92a-1_194499	1.1285	0.1062	0.5284
hsa-mir-191_175009	6.5915	0.1061	0.5286
ENST00000387400.1_204453	6.617	0.106	0.529
hsa-mir-150_80110	61.4382	0.1059	0.5291
hsa-mir-16-2_122524	14.4835	0.1057	0.5296
hsa-mir-382_65854	3.0948	0.105	0.5309
ENST00000631292.1_129509	3.3201	0.1047	0.5316
hsa-mir-30e_186936	171.439	0.1046	0.5319
hsa-mir-126_312942	5.8602	0.1041	0.5328
RP11-846F4.3-001_65578	-11.2631	0.104	0.533
hsa-mir-24-2_163309	1.5692	0.104	0.533
hsa-let-7b_295024	2.2186	0.1038	0.5335
hsa-mir-4433a_166366	-6.793	0.1037	0.5336
hsa-mir-140_22504	19.927	0.1036	0.5338
RNY3P2-201_132129	-1.4236	0.1034	0.5342
hsa-mir-3184_139086	-3.1186	0.1034	0.5344
hsa-mir-4433a_297666	3.4514	0.1034	0.5342
RNY4P23-201_300108	-5.6295	0.1032	0.5347
RNY4P16-201_18896	7.0012	0.103	0.5352
hsa-mir-194-1_74646	7.6979	0.1028	0.5356
hsa-mir-451b_295282	1300.55	0.1028	0.5356
hsa-mir-16-1_256869	3.6216	0.1027	0.5358
hsa-mir-223_113424	-1.0831	0.1026	0.5359
hsa-mir-30a_85651	34.4032	0.1019	0.5374
hsa-mir-574_85075	1.8995	0.1015	0.5383
hsa-mir-425_225847	-3.4256	0.1014	0.5385
hsa-mir-223_150885	1.8418	0.1013	0.5388
hsa-mir-92a-1_354518	-1.8229	0.1013	0.5388
hsa-mir-150_267228	2.1008	0.1002	0.541
hsa-mir-486-2_348346	-2.0891	0.1002	0.5411
hsa-mir-142_108887	-2.5899	0.1	0.5415
hsa-mir-134_90804	-1.0185	0.0997	0.5421
hsa-mir-93_291517	-5.6019	0.0994	0.5427
hsa-let-7f-2_226304	3.2415	0.0989	0.5439
RNY4P20-201_357323	2.196	0.0989	0.5438
hsa-let-7b_346371	2.7369	0.0988	0.5439
RP11-752G15.5-002_248882	-0.744	0.0987	0.5442
hsa-mir-21_252980	2.778	0.0987	0.5443
hsa-mir-140_381629	3.8491	0.0985	0.5447
hsa-mir-23a_196572	6.6218	0.0984	0.5448
hsa-mir-92b_322636	1.3882	0.0984	0.5449
hsa-mir-191_81813	0.5944	0.0982	0.5454
hsa-mir-199a-1_318521	-147.53	0.098	0.5458
hsa-mir-199a-1_17100	-0.8098	0.0978	0.5463
hsa-mir-3620_94849	-0.7338	0.0978	0.5461
hsa-mir-16-1_227523	1.0721	0.0978	0.5462
RNY4P23-201_222243	82.6995	0.0976	0.5467
hsa-let-7d_265944	-1.6851	0.0976	0.5466
hsa-mir-378a_388523	-1.0726	0.0974	0.547
hsa-mir-576_255468	1.2306	0.0972	0.5475
hsa-mir-223_162627	-4.7271	0.0971	0.5478
hsa-mir-23b_120455	1.5068	0.0966	0.5488
hsa-mir-30a_366453	3.2436	0.0965	0.549
hsa-mir-26a-2_1702	0.7427	0.0963	0.5495
hsa-let-7b_51999	0.6518	0.0962	0.5497
hsa-mir-150_89184	2.6726	0.0962	0.5496
hsa-mir-126_333323	1.0755	0.0961	0.5499
hsa-mir-877_265156	1.4469	0.096	0.5501
RNY4P23-201_122731	1.259	0.0956	0.5511
hsa-mir-654_177575	1.9139	0.0956	0.551
hsa-let-7i_52329	2.5494	0.0955	0.5511
hsa-mir-625_63616	4.2186	0.0952	0.5518
RNY4P14-201_69791	2.4696	0.0952	0.5519
hsa-mir-29b-2_167309	3.8989	0.0951	0.552
hsa-mir-143_72095	1.6785	0.0947	0.5531
hsa-mir-26b_213301	2.0646	0.0947	0.553
hsa-mir-941-5_265550	-1.4394	0.0947	0.5529
hsa-mir-30b_14850	-24.3925	0.0946	0.5532
hsa-mir-486-2_78120	22.6367	0.0946	0.5533
hsa-mir-942_95599	2.1724	0.0946	0.5532
hsa-let-7b_328675	182.785	0.0945	0.5533
hsa-mir-128-1_227737	3.6235	0.0943	0.5539
RP11-846F4.3-001_72303	2.4406	0.0941	0.5542
RP11-727F15.8-001_247531	8.4891	0.0941	0.5543
hsa-mir-30e_146175	1.532	0.0935	0.5556
hsa-mir-146a_237856	1.1304	0.0935	0.5555
hsa-mir-130b_55334	0.7787	0.0933	0.556
hsa-mir-432_168869	47.9382	0.0933	0.5562
hsa-mir-3173_257585	2.2708	0.0933	0.556
hsa-mir-15b_24034	0.4984	0.0932	0.5562
hsa-mir-16-1_83326	3.0799	0.0929	0.5569
hsa-mir-30d_99737	0.9466	0.0928	0.5571
hsa-mir-486-2_201671	2.1944	0.0927	0.5574
hsa-mir-4433a_228329	-1.3468	0.0926	0.5575
hsa-mir-223_67388	1.224	0.0922	0.5586
hsa-mir-146a_79960	299.596	0.0921	0.5588
hsa-mir-320a_3961	-1.3249	0.0919	0.5591
hsa-mir-484_16025	-0.6657	0.0916	0.5599
ENST00000416946.1_2607	-27.678	0.0915	0.5601
hsa-mir-25_8981	1.0514	0.091	0.5613
RP11-317N8.1-001_12390	0.8348	0.0908	0.5617
hsa-mir-652_133548	5.1884	0.0908	0.5616
hsa-mir-223_166367	1.3538	0.0908	0.5618
hsa-mir-345_175733	-2.7846	0.0908	0.5616
hsa-mir-654_278783	3.0677	0.0908	0.5617
hsa-mir-18a_8080	1.0181	0.0905	0.5623
hsa-mir-181a-2_59539	2.2535	0.0904	0.5626
hsa-let-7b_372918	0.7042	0.0903	0.5628
ENST00000414659.5_31462	3.5985	0.0901	0.5633
RP11-846F4.3-001_370470	1.2467	0.0901	0.5633
hsa-mir-1249_274136	10.8115	0.0897	0.5642
hsa-mir-186_161726	-0.8476	0.0887	0.5665
hsa-let-7e_311990	0.2351	0.0886	0.5667
hsa-mir-222_42720	-66.1314	0.0884	0.5672
hsa-mir-25_222963	-1.0485	0.0884	0.5672
hsa-mir-21_242786	3.3374	0.0884	0.5671
hsa-mir-151a_26678	-0.7655	0.0882	0.5677
hsa-let-7i_153894	52.0546	0.0879	0.5684
hsa-mir-26b_95108	-0.3565	0.0878	0.5686
hsa-mir-223_348788	11.2846	0.0878	0.5686
hsa-mir-103b-1_355942	-1.5622	0.0877	0.5688
hsa-mir-151a_204748	1.2686	0.0876	0.5691
hsa-mir-486-2_245656	8.2617	0.0873	0.5696
RP11-846F4.3-001_378044	1.8744	0.0873	0.5698
hsa-mir-199a-1_293445	-147.323	0.0871	0.5701
hsa-mir-128-1_86170	5.5216	0.0869	0.5705
ENST00000554988.1_323449	0.8469	0.086	0.5728
hsa-mir-92a-1_259425	218.015	0.0859	0.5729
hsa-mir-500a_380230	-1.1874	0.0858	0.5731
hsa-mir-361_176003	2.0578	0.0855	0.574
ENST00000387400.1_242032	-22.8113	0.0852	0.5747
hsa-let-7b_106573	1.7605	0.0851	0.5748
ENST00000363624.1_307325	-1.4259	0.0844	0.5765
hsa-mir-223_139360	0.2462	0.0843	0.5766
hsa-mir-486-2_227217	3.4125	0.0843	0.5768
hsa-mir-151a_264735	0.582	0.0842	0.577
RP11-846F4.3-001_3905	-4.6907	0.0841	0.5772
hsa-mir-199a-1_294225	3.0299	0.084	0.5775
hsa-mir-486-2_32560	3.2609	0.0839	0.5778
hsa-mir-106b_33071	-1.9038	0.0839	0.5777
hsa-mir-30a_371444	2.3722	0.0838	0.5778
hsa-let-7b_44366	2.3062	0.0835	0.5786
hsa-mir-150_346055	-0.9139	0.0835	0.5785
tRNA-Leu-TAG-1-1_351047	26.4217	0.0834	0.5789
hsa-mir-144_98328	6.2168	0.0833	0.579
hsa-mir-379_228632	3.2982	0.0833	0.5791
hsa-mir-487a_3741	1.155	0.0826	0.5808
hsa-mir-320a_95611	3.4875	0.0826	0.5809
hsa-mir-574_324721	-7.9184	0.0823	0.5815
hsa-mir-485_270073	30.9777	0.0818	0.5827
ENST00000445125.2_17369	1.6065	0.0814	0.5837
hsa-mir-22_62933	-1.4251	0.0813	0.5838
hsa-mir-3184_185990	2.2672	0.0813	0.5839
hsa-mir-484_7654	6.4801	0.0812	0.5842
hsa-mir-155_263397	0.8846	0.0812	0.5841
hsa-mir-486-2_271979	5.204	0.0812	0.5842
hsa-mir-221_78341	-13.7387	0.0809	0.5848
hsa-mir-26b_268966	-1.1099	0.0808	0.5851
hsa-mir-3184_16756	-11.6726	0.0807	0.5854
hsa-mir-584_182575	2.0964	0.0805	0.5859
hsa-let-7f-2_105087	0.6201	0.0804	0.5862
hsa-mir-24-2_194498	-2.9554	0.0803	0.5862
hsa-mir-16-1_34005	1.158	0.08	0.5871
hsa-mir-151a_380855	-7.336	0.0796	0.5881
hsa-mir-451b_25065	14.1225	0.0794	0.5886
hsa-mir-24-2_89954	-2.6617	0.0793	0.5889
hsa-mir-26b_219101	-0.4968	0.0792	0.5891
hsa-mir-148b_339870	33.2143	0.0792	0.589
hsa-mir-374a_189382	-42.0909	0.0791	0.5892
hsa-mir-152_107744	-3.8818	0.0789	0.5897
hsa-mir-486-2_11543	0.8674	0.0788	0.59
hsa-mir-25_157275	2.752	0.0788	0.5899
hsa-mir-29c_84119	-2.7677	0.0787	0.5903
hsa-mir-486-2_307147	1.8232	0.0786	0.5906
hsa-mir-30d_386110	3.6384	0.0784	0.591
hsa-mir-425_44864	1.384	0.0783	0.5912
hsa-mir-451b_262653	2.9185	0.0782	0.5914
hsa-mir-30e_75430	1.0639	0.078	0.5921
hsa-let-7a-1_88684	156.583	0.0779	0.5923
hsa-mir-320a_113874	-64.8604	0.0779	0.5923
hsa-mir-486-2_303074	0.8563	0.0777	0.5927
hsa-mir-590_309700	0.3274	0.0776	0.593
hsa-let-7f-2_117550	86.1033	0.0775	0.5933
tRNA-Pro-TGG-1-1_94171	3.5145	0.077	0.5944
hsa-mir-486-2_286917	5.5753	0.077	0.5945
hsa-let-7f-2_298080	56.6112	0.077	0.5945
RP11-215L17.2-001_19187	2.4781	0.0768	0.595
hsa-mir-19b-2_81413	-15.6387	0.0768	0.595
hsa-mir-409_86631	3.9873	0.0768	0.5948
hsa-mir-10a_36651	1.5589	0.0766	0.5955
hsa-mir-30c-2_178103	10.2113	0.0766	0.5955
hsa-mir-486-2_122626	9.9481	0.0765	0.5957
hsa-mir-28_47493	-3.653	0.0762	0.5964
hsa-mir-889_357232	1.154	0.076	0.5971
hsa-mir-185_167094	0.8009	0.0759	0.5972
RNY4P10-201_105378	5.844	0.0756	0.5981
hsa-mir-486-2_260579	1.2267	0.0754	0.5985
hsa-mir-30d_240060	3.7636	0.0752	0.599
hsa-let-7f-2_383755	-1.1349	0.075	0.5996
RNY1P12-201_168145	3.1607	0.0747	0.6001
hsa-let-7i_235261	-0.6921	0.0747	0.6002
hsa-mir-101-1_262406	8.2037	0.0746	0.6004
hsa-mir-30a_107952	1.8841	0.074	0.6019
hsa-mir-3184_116800	6.0861	0.0739	0.6022
hsa-mir-486-2_311138	-0.6638	0.0738	0.6026
hsa-let-7a-1_321544	1.314	0.0738	0.6025
hsa-let-7d_158304	-1.7461	0.0729	0.6049
hsa-mir-584_88525	-1.9201	0.0728	0.6051
hsa-mir-140_38632	7.593	0.0726	0.6057
hsa-mir-320a_135079	1.9873	0.0723	0.6065
hsa-let-7c_25130	-0.9188	0.0718	0.6077
hsa-mir-21_95115	3.0922	0.0714	0.6087
hsa-mir-3184_323116	3.6181	0.0714	0.6086
hsa-mir-425_8959	-0.5933	0.0713	0.6091
hsa-mir-150_351511	17.559	0.0711	0.6094
SMC1A-202_253221	2.8871	0.071	0.6097
RP11-193H5.6-001_377332	1.6865	0.0706	0.6109
hsa-mir-374c_93074	-23.1811	0.0705	0.6111
hsa-mir-151a_203330	4.5405	0.0705	0.611
hsa-mir-328_386000	1.8152	0.0705	0.6111
hsa-mir-744_297711	-40.5896	0.0704	0.6114
hsa-mir-1249_351187	4.0671	0.0704	0.6114
hsa-mir-185_214825	-0.4928	0.0703	0.6117
hsa-mir-106b_205021	-4.7093	0.0702	0.612
hsa-mir-148a_40664	11.7974	0.07	0.6123
hsa-mir-21_50789	0.6815	0.07	0.6124
hsa-mir-486-2_295307	1.0066	0.07	0.6125
hsa-mir-30d_6164	-1.5717	0.0699	0.6127
ENST00000445125.2_208216	3.4678	0.0699	0.6127
ENST00000500358.6_3013	3.5941	0.0697	0.6131
ENST00000387314.1_181071	2.2476	0.0694	0.614
hsa-mir-101-1_281452	63.9242	0.0694	0.6141
hsa-mir-26a-2_343473	2.4958	0.0693	0.6143
hsa-mir-4446_249885	-1.3926	0.0692	0.6146
RNY4P10-201_30452	0.5396	0.0691	0.6147
hsa-mir-15b_22930	-0.8189	0.069	0.615
RNY4P23-201_198416	8.0098	0.069	0.615
hsa-mir-6842_240623	-0.3412	0.069	0.6151
hsa-mir-30e_344085	6.1144	0.0685	0.6164
hsa-mir-3184_298331	1.5372	0.0682	0.6171
hsa-mir-144_175086	4.9889	0.0681	0.6176
hsa-mir-451b_373012	7.5828	0.068	0.6177
hsa-mir-103b-1_98789	11.284	0.0678	0.6182
hsa-mir-486-2_29847	1.719	0.0676	0.6188
hsa-mir-486-2_251876	5.9075	0.0674	0.6193
hsa-mir-151a_123286	0.9788	0.0672	0.6199
hsa-let-7f-2_373834	1.3413	0.067	0.6204
hsa-mir-30d_153843	4.5892	0.0667	0.6213
RNY4P16-201_236477	-13.9067	0.0666	0.6214
hsa-let-7b_318816	2.1843	0.0666	0.6216
hsa-let-7i_22171	-0.6337	0.0663	0.6224
hsa-mir-26a-2_218556	0.4025	0.0663	0.6223
hsa-mir-320a_51454	-2.1746	0.066	0.6231
hsa-let-7b_103143	-0.3723	0.0659	0.6233
hsa-mir-339_209089	-5.6696	0.0658	0.6236
hsa-mir-486-2_70222	22.8303	0.0656	0.6243
hsa-mir-451b_337338	1.6191	0.0655	0.6244
hsa-mir-223_35558	0.6319	0.0652	0.6254
hsa-mir-142_331749	5.1184	0.0649	0.6262
hsa-mir-22_309163	92.9434	0.0647	0.6266
hsa-mir-744_122984	-24.6814	0.0645	0.6274
hsa-mir-32_231011	4.8725	0.064	0.6286
hsa-mir-146a_255194	4.9256	0.064	0.6285
hsa-mir-223_171479	-1.3265	0.0637	0.6293
hsa-mir-92a-1_171784	0.7331	0.0637	0.6294
hsa-mir-155_141326	3.3797	0.0634	0.6302
hsa-mir-26b_30622	-0.8756	0.0633	0.6304
hsa-mir-106b_99152	-0.6986	0.0633	0.6305
hsa-mir-487b_230765	0.9126	0.0632	0.6309
hsa-mir-342_179583	-0.3934	0.0631	0.6311
hsa-let-7a-1_207520	3.8652	0.063	0.6313
ENST00000387409.1_76094	0.6308	0.0629	0.6318
hsa-mir-451b_117475	2.797	0.0627	0.6323
hsa-let-7g_188854	31.1075	0.0627	0.6323
hsa-mir-320a_319461	-0.6541	0.0624	0.6331
hsa-mir-486-2_220203	-1.8032	0.0623	0.6333
hsa-mir-26a-2_3021	-1.6936	0.0622	0.6335
RP11-312N17.3-003_321823	-1.3507	0.0622	0.6336
hsa-mir-92a-1_46180	4.4782	0.0621	0.6339
hsa-mir-26b_140017	2.0144	0.0621	0.6339
hsa-mir-103b-1_337709	9.0086	0.062	0.6342
RP11-752G15.5-002_23775	2.3342	0.0619	0.6346
hsa-let-7g_238327	-2.3363	0.0619	0.6346
hsa-mir-29b-2_53190	-0.4751	0.0618	0.6349
hsa-mir-23a_104406	0.7857	0.0615	0.6357
hsa-let-7g_346937	0.4888	0.0614	0.6361
ENST00000641545.1_127358	4.406	0.0612	0.6365
hsa-mir-16-2_361359	3.7047	0.0612	0.6364
ENST00000554988.1_21051	1.7593	0.0607	0.638
hsa-mir-150_84914	333.567	0.0607	0.638
hsa-mir-3184_146772	-6.039	0.0607	0.638
hsa-mir-486-2_319215	4.3761	0.0607	0.638
hsa-mir-30e_265891	0.6309	0.0605	0.6386
hsa-mir-26a-2_141330	0.8266	0.0604	0.6387
hsa-mir-26b_190519	13.4096	0.0602	0.6393
hsa-mir-486-2_299908	-0.25	0.06	0.6398
hsa-let-7i_270119	-65.7417	0.0599	0.6403
hsa-let-7a-3_382347	9.1849	0.0599	0.6401
hsa-mir-26b_110402	-0.9611	0.0597	0.6407
tRNA-Arg-CCT-5-1_14135	1.134	0.0596	0.6411
hsa-mir-25_107390	0.4835	0.0596	0.6411
hsa-mir-142_164622	-0.4476	0.0595	0.6412
tRNA-Pro-TGG-3-1_356299	4.3033	0.0595	0.6413
hsa-mir-30e_151355	2.5911	0.0593	0.6419
hsa-mir-224_185348	1.4935	0.0592	0.6423
hsa-let-7i_310291	4.1815	0.0592	0.6423
hsa-mir-486-2_329588	2.2995	0.0589	0.6431
RNY4-201_81968	-3.1034	0.0588	0.6433
hsa-mir-576_84383	-2.679	0.0588	0.6434
hsa-let-7f-2_27881	94.727	0.0584	0.6446
hsa-mir-20b_167190	1.8644	0.0582	0.6453
hsa-mir-328_99580	-4.3382	0.0579	0.646
hsa-mir-4286_117186	-2.675	0.0579	0.6459
hsa-mir-339_240264	-0.6238	0.0574	0.6476
hsa-mir-16-2_295697	0.7532	0.0574	0.6475
hsa-let-7d_99911	-1.2368	0.0573	0.6478
hsa-mir-222_327846	-2.4156	0.0572	0.6481
hsa-let-7a-1_25858	8.1947	0.0569	0.6489
hsa-let-7a-1_205933	1.5583	0.0567	0.6496
hsa-let-7b_280725	-2.9648	0.0567	0.6495
hsa-mir-21_106184	-0.7523	0.0565	0.6501
hsa-mir-339_142965	-14.7032	0.0565	0.6501
hsa-mir-342_74532	1.0286	0.0563	0.6508
RNY1P12-201_242365	-2.0153	0.0563	0.6507
RNY4-201_57661	164.293	0.0561	0.6514
hsa-let-7i_24180	5.251	0.0559	0.6518
hsa-let-7a-1_387424	-0.7787	0.0559	0.652
hsa-mir-127_7702	6.6703	0.0558	0.6523
hsa-mir-1843_2982	1.0263	0.0557	0.6525
hsa-mir-744_272782	0.4765	0.0556	0.6528
hsa-mir-484_253213	31.3604	0.0555	0.6531
hsa-mir-221_244546	2.8849	0.0552	0.654
hsa-mir-16-1_272362	3.4915	0.0548	0.6554
hsa-mir-486-2_356320	1.9991	0.0547	0.6557
tRNA-Glu-TTC-2-2_19840	-2.538	0.0544	0.6566
hsa-mir-16-1_2996	133.201	0.0543	0.6567
hsa-mir-486-2_174446	2.8763	0.0542	0.6572
hsa-mir-432_167722	11.79	0.0541	0.6573
hsa-mir-15b_54099	-0.4903	0.054	0.6576
hsa-mir-126_159506	26.4162	0.054	0.6577
hsa-mir-106b_266871	6.144	0.0537	0.6587
hsa-mir-16-2_164190	0.595	0.0536	0.659
hsa-mir-155_15534	6.188	0.0531	0.6606
hsa-let-7a-1_204893	1.257	0.0529	0.6611
hsa-mir-126_45281	22.4729	0.0526	0.662
hsa-let-7f-2_140514	12.6101	0.0525	0.6624
hsa-mir-21_50519	0.4769	0.0522	0.6632
ENST00000387449.1_165196	1.6555	0.0522	0.6632
ENST00000567819.1_79652	0.7422	0.0521	0.6636
hsa-mir-155_58638	1.1934	0.052	0.6639
hsa-mir-16-1_73952	4.2425	0.0519	0.6643
hsa-mir-486-2_242498	3.3972	0.0516	0.665
hsa-mir-16-1_94708	107.806	0.0515	0.6655
hsa-mir-320a_48874	1.5878	0.0514	0.6658
hsa-mir-95_334212	2.7584	0.0514	0.6656
hsa-mir-186_209163	1.2352	0.0513	0.6661
tRNA-Pro-TGG-1-1_330126	2.9412	0.0511	0.6668
tRNA-Leu-CAG-2-2_325725	-0.6502	0.0509	0.6674
hsa-let-7a-1_105755	1382.15	0.0507	0.6679
hsa-mir-126_197200	1.994	0.0506	0.6684
hsa-let-7a-1_93797	-0.3926	0.0504	0.6689
hsa-mir-361_201594	-0.6795	0.0503	0.6691
hsa-let-7b_201643	0.6311	0.0503	0.6691
hsa-mir-342_307315	15.7387	0.0503	0.6693
hsa-mir-98_130479	-0.7836	0.0502	0.6694
hsa-let-7b_106018	5.9979	0.0501	0.67
hsa-mir-15b_185564	0.5116	0.0501	0.67
hsa-mir-221_65081	-0.9566	0.05	0.6701
SMC1A-202_105051	2.4743	0.05	0.6701
hsa-mir-1249_107525	0.676	0.0499	0.6704
RNY4-201_290984	27.4171	0.0497	0.6712
hsa-mir-877_5653	-0.8899	0.0496	0.6714
RNY4-201_36466	6.7166	0.0495	0.6717
hsa-mir-30a_286113	-5.6122	0.0492	0.6729
hsa-mir-185_81680	26.9714	0.0488	0.6741
hsa-mir-25_166606	0.7559	0.0487	0.6743
hsa-mir-1306_185594	-3.3852	0.0486	0.6747
CTB-54O9.4-002_362947	3.8932	0.0486	0.6746
ENST00000464816.1_206814	8.4993	0.0485	0.675
hsa-let-7f-2_290723	0.9959	0.0485	0.6751
hsa-mir-148b_91425	-0.8061	0.0484	0.6754
hsa-mir-584_324307	26.1728	0.0484	0.6753
ENST00000500358.6_343360	0.7974	0.0482	0.6758
hsa-let-7a-1_119852	0.9524	0.0479	0.6771
hsa-mir-26b_272964	-21.1641	0.0479	0.677
hsa-mir-1249_96148	1.1027	0.0477	0.6778
hsa-mir-29b-2_148189	-2.1646	0.0477	0.6776
hsa-mir-451b_173960	1.0821	0.0477	0.6776
hsa-mir-16-1_192231	1535.33	0.0476	0.6781
hsa-mir-625_326249	2.1998	0.0475	0.6782
RNY4P16-201_341055	-0.7585	0.0474	0.6786
hsa-let-7a-1_135791	2.1998	0.0473	0.6788
hsa-let-7g_108406	0.6291	0.0472	0.6794
hsa-mir-25_224288	54.7248	0.0471	0.6795
hsa-mir-4433a_241548	2.4952	0.0471	0.6797
hsa-let-7f-2_359398	-0.343	0.0471	0.6797
hsa-mir-370_94665	5.1459	0.047	0.68
tRNA-Pro-AGG-2-1_73824	1.4398	0.0469	0.6802
hsa-mir-484_195889	2.8853	0.0469	0.6802
hsa-mir-151a_146455	1.8223	0.0468	0.6804
hsa-let-7a-1_359648	0.5726	0.0467	0.681
hsa-mir-324_148421	0.9806	0.0466	0.6813
hsa-mir-155_295625	-0.6514	0.0465	0.6815
RP11-752G15.5-002_201172	-0.8338	0.0464	0.6819
hsa-mir-128-1_369261	0.9372	0.0464	0.6817
hsa-mir-223_72592	1.1737	0.0463	0.6823
hsa-mir-26a-2_75646	0.5104	0.0462	0.6825
hsa-let-7i_106014	-1.9997	0.0462	0.6827
ENST00000387347.2_324571	-0.3457	0.0461	0.683
hsa-mir-19a_155919	-1.2741	0.046	0.6832
RNY4-201_215978	-0.8088	0.046	0.6834
hsa-mir-26a-1_95668	-0.6682	0.0458	0.6839
hsa-mir-30e_329281	1.0828	0.0458	0.6838
hsa-let-7i_384371	-0.9451	0.0457	0.6842
hsa-mir-30d_161360	0.1933	0.0456	0.6845
hsa-mir-197_52583	1.2593	0.0452	0.686
hsa-mir-199a-1_259740	-0.9972	0.0448	0.6872
hsa-mir-10a_45549	1.5204	0.0447	0.6874
RNY4P16-201_267433	-0.5812	0.0447	0.6874
hsa-mir-486-2_174240	0.6214	0.0446	0.6879
hsa-mir-29c_163565	-7.2445	0.0444	0.6887
hsa-mir-451b_310112	187.704	0.0443	0.6889
hsa-mir-101-1_15041	0.9002	0.0442	0.6893
hsa-mir-26b_268852	-34.8213	0.0438	0.6906
hsa-mir-103b-1_145429	-22.0554	0.0436	0.6913
hsa-mir-182_250289	-5.0852	0.0436	0.6912
ENST00000387347.2_28342	-0.5056	0.0434	0.6921
hsa-mir-16-2_43754	0.7841	0.0433	0.6924
hsa-mir-93_145834	-13.3564	0.0432	0.6928
hsa-mir-25_240313	0.8958	0.0431	0.6929
hsa-mir-92a-1_125943	3.5583	0.0429	0.6939
hsa-mir-195_342952	1.5053	0.0428	0.6941
hsa-mir-331_14856	-1.2611	0.0427	0.6944
hsa-mir-15a_160828	-6.0607	0.0426	0.6948
hsa-let-7d_327880	-1.6855	0.0426	0.6948
hsa-mir-15b_323026	10.0318	0.0424	0.6955
hsa-mir-21_35039	-0.6467	0.0422	0.696
ENST00000387400.1_163357	2.3397	0.0422	0.6962
tRNA-Ala-TGC-3-2_135972	-0.5811	0.0419	0.6974
hsa-mir-223_300599	12.7828	0.0417	0.698
hsa-mir-150_154997	13.7407	0.0414	0.6991
AC106782.9-001_268266	-2.1261	0.0414	0.6992
hsa-mir-576_17179	3.4726	0.0413	0.6993
tRNA-iMet-CAT-1-8_115116	0.321	0.0413	0.6993
ENST00000500358.6_164855	1.8275	0.0413	0.6993
hsa-let-7c_244606	4.024	0.0412	0.6997
hsa-mir-486-2_192408	2.0234	0.0411	0.6999
hsa-mir-1246_231014	-0.6273	0.0411	0.7002
hsa-let-7e_150521	0.4298	0.041	0.7005
hsa-mir-25_218112	-0.7253	0.0408	0.7013
hsa-mir-25_132490	0.6035	0.0405	0.7021
RNY4-201_150104	7.5791	0.0405	0.7021
hsa-mir-92a-1_318788	0.7542	0.0403	0.7028
hsa-mir-1307_333908	-0.4749	0.0403	0.703
hsa-mir-145_64306	0.7501	0.0402	0.7031
hsa-mir-151a_176992	1.2295	0.0402	0.7034
hsa-mir-98_181750	-3.1547	0.0402	0.7032
ENST00000631292.1_241831	3.3089	0.0399	0.7045
hsa-mir-486-2_256116	2.1937	0.0399	0.7042
hsa-mir-223_297507	-1.3718	0.0399	0.7044
hsa-mir-486-2_338827	591.959	0.0397	0.7049
hsa-mir-223_33628	0.4646	0.0396	0.7055
hsa-mir-486-2_327004	257.201	0.0396	0.7055
hsa-mir-29a_328009	1.2563	0.0395	0.7058
hsa-mir-425_93240	-0.2349	0.0392	0.7069
hsa-mir-15a_132948	-3.1471	0.0392	0.7069
hsa-mir-505_133611	1.9215	0.0392	0.7069
hsa-mir-30a_8012	19.698	0.0389	0.7082
hsa-mir-11401_49209	0.5097	0.0389	0.708
hsa-mir-451b_300149	504.182	0.0389	0.7081
hsa-mir-424_145145	-0.924	0.0388	0.7083
hsa-mir-146a_25522	-72.6311	0.0385	0.7096
hsa-let-7f-2_114556	3.478	0.038	0.7113
hsa-mir-342_28467	10.817	0.0379	0.7116
hsa-mir-486-2_159224	4.035	0.0379	0.7118
hsa-mir-16-1_88020	1.1838	0.0378	0.7121
hsa-mir-16-1_217120	9.7498	0.0378	0.712
hsa-mir-130b_287911	-1.3667	0.0377	0.7124
hsa-mir-15b_97617	14.2257	0.0376	0.7127
hsa-mir-103b-1_225381	0.8639	0.0376	0.7129
hsa-mir-223_319955	-1.7816	0.0375	0.7132
hsa-mir-103b-1_110365	1.0594	0.0371	0.7148
hsa-mir-30c-2_134210	0.7776	0.0371	0.7148
hsa-mir-126_165887	0.436	0.0371	0.7148
hsa-mir-134_121595	2.0853	0.037	0.715
hsa-mir-150_212412	1.008	0.037	0.7151
hsa-mir-126_83940	201.647	0.0368	0.7157
tRNA-Pro-TGG-1-1_313115	8.2588	0.0368	0.716
hsa-mir-21_30760	0.9545	0.0367	0.7163
hsa-mir-26b_117785	-2.5515	0.0366	0.7167
hsa-mir-223_126531	1.0402	0.0365	0.7168
hsa-mir-382_161967	4.262	0.0362	0.7181
hsa-mir-3184_128635	0.4576	0.036	0.7188
hsa-mir-495_158727	2.8616	0.0359	0.7191
hsa-mir-326_228954	-2.4315	0.0357	0.7199
hsa-mir-103b-1_309187	2.84	0.0357	0.7201
ENST00000641545.1_20201	3.3451	0.0352	0.722
SMC1A-202_152816	3.9533	0.0352	0.7218
hsa-let-7b_208495	179.287	0.0351	0.7222
hsa-mir-4433a_295984	-5.5471	0.0351	0.7223
hsa-mir-486-2_260369	3.0797	0.035	0.7228
hsa-mir-101-1_230594	-1.8298	0.0349	0.723
hsa-mir-223_66968	-0.3943	0.0348	0.7234
hsa-mir-1306_139212	2.0266	0.0348	0.7233
hsa-mir-142_248133	6.0113	0.0346	0.7243
hsa-mir-134_322639	1.4906	0.0345	0.7245
hsa-mir-361_277613	0.2654	0.0344	0.7248
hsa-mir-92a-1_354683	3.153	0.0343	0.7253
hsa-mir-30a_186251	0.5518	0.0338	0.7274
hsa-mir-92a-1_115314	-0.5618	0.0337	0.7276
hsa-let-7b_12323	0.7732	0.0336	0.728
hsa-mir-92a-1_70633	1.3787	0.0336	0.7281
hsa-let-7c_115512	-0.3425	0.0336	0.7281
RP11-203J14.1-001_165229	1.9036	0.0336	0.728
hsa-mir-328_265825	-8.2554	0.0336	0.728
RP11-849F2.1-001_145220	-0.711	0.0335	0.7283
hsa-let-7a-1_199965	7.8445	0.0333	0.7295
ENST00000459091.1_14163	0.6651	0.0331	0.7302
hsa-mir-16-2_35932	1.0267	0.0329	0.7307
RNY4P10-201_40823	14.4076	0.0329	0.731
hsa-mir-320a_364398	-2.3948	0.0329	0.7311
ENST00000445125.2_114891	0.984	0.0328	0.7311
hsa-mir-130b_216189	1.1141	0.0327	0.7318
hsa-mir-15a_8704	-1.0428	0.0326	0.732
hsa-mir-126_280532	-0.2047	0.0326	0.7322
RNY4P23-201_12592	-4.9238	0.0325	0.7324
hsa-mir-324_103120	-0.9358	0.0325	0.7325
hsa-mir-486-2_250900	1791.14	0.0325	0.7323
hsa-mir-30d_82143	11.1942	0.0324	0.7331
hsa-mir-148a_328640	-2.4387	0.0324	0.7331
hsa-mir-432_242398	-0.5692	0.0323	0.7331
hsa-mir-151a_298040	-1.9644	0.0323	0.7333
hsa-mir-26b_157161	-1.3273	0.0322	0.7336
hsa-mir-660_216623	-1.9781	0.032	0.7346
hsa-mir-151a_21345	7.4611	0.0318	0.7355
hsa-let-7a-3_176574	0.6188	0.0316	0.7361
hsa-mir-93_241697	0.8773	0.0315	0.7366
hsa-mir-483_133260	-1.1322	0.0314	0.7368
ENST00000387342.1_142606	0.5795	0.0312	0.738
hsa-mir-486-2_156609	3.9794	0.0312	0.7378
hsa-mir-486-2_205817	1.1931	0.031	0.7388
hsa-mir-29c_313926	0.445	0.031	0.7387
tRNA-Pro-TGG-3-5_19618	-0.5568	0.0304	0.7412
hsa-mir-16-1_332891	0.778	0.0304	0.7412
hsa-let-7b_74169	0.7326	0.0303	0.7414
hsa-mir-486-2_159889	1.3078	0.03	0.7426
ENST00000387400.1_327819	2.6015	0.03	0.7429
RNY4-201_296672	2.2112	0.0297	0.7441
hsa-mir-130b_164059	4.3538	0.0296	0.7446
hsa-mir-106b_239215	0.6752	0.0296	0.7444
hsa-mir-223_329595	1.2091	0.0296	0.7446
hsa-mir-425_121535	2.4946	0.0294	0.7451
hsa-mir-25_47345	64.3408	0.0292	0.7463
hsa-mir-26b_15140	-0.3293	0.0289	0.7473
hsa-mir-26a-2_201231	-0.652	0.0289	0.7474
hsa-let-7c_216273	-0.5704	0.0289	0.7474
hsa-mir-101-1_354021	1.6687	0.0289	0.7473
hsa-mir-6511a-4_166495	0.9713	0.0288	0.7479
hsa-mir-1307_227000	1.0855	0.0287	0.7483
hsa-mir-26b_31153	2.2284	0.0282	0.7505
hsa-mir-484_82267	4.7963	0.028	0.7514
hsa-mir-98_316343	-73.1442	0.028	0.7513
hsa-mir-199a-1_132847	2.6145	0.0278	0.752
hsa-mir-30c-2_158525	75.5625	0.0278	0.7524
hsa-mir-27a_162428	-0.6931	0.0278	0.7524
hsa-mir-484_285702	6.0925	0.0278	0.752
hsa-mir-451b_18787	264.015	0.0277	0.7526
hsa-mir-3184_161589	0.9122	0.0274	0.754
hsa-mir-664a_193649	1.0772	0.0274	0.7541
hsa-mir-223_213079	0.5668	0.0274	0.7539
hsa-mir-151a_76826	-0.5156	0.0273	0.7546
hsa-mir-628_232448	1.4641	0.0272	0.755
hsa-mir-106b_130288	22.7911	0.0271	0.7555
hsa-mir-181a-2_373050	1.0023	0.0266	0.7575
hsa-mir-451b_309627	2.6424	0.0264	0.7582
hsa-mir-340_316545	1.0557	0.0264	0.7585
hsa-mir-361_66493	0.6304	0.0261	0.7597
hsa-mir-21_299359	0.3793	0.0261	0.7596
hsa-let-7b_320155	5.5337	0.0259	0.7608
hsa-mir-486-2_371957	-0.6545	0.0259	0.7606
hsa-mir-21_231528	0.7601	0.0258	0.7612
hsa-mir-93_260900	-1.4992	0.0258	0.7613
tRNA-Glu-CTC-1-7_134190	0.5551	0.0257	0.7614
hsa-let-7a-1_178948	-0.2294	0.0257	0.7614
hsa-mir-126_90944	1.0446	0.0256	0.7618
hsa-mir-431_93435	-0.3456	0.0256	0.7622
hsa-mir-486-2_148163	1.6579	0.0256	0.7621
hsa-mir-486-2_339588	0.9737	0.0256	0.7623
ENST00000387342.1_369710	-1.4251	0.0254	0.7631
hsa-mir-28_184712	0.6894	0.0252	0.764
hsa-mir-223_102627	-0.8211	0.0249	0.7651
hsa-mir-379_240270	0.9513	0.0247	0.7663
hsa-mir-1307_40231	-0.4986	0.0246	0.7667
hsa-mir-16-1_100089	17.4682	0.0245	0.7671
MT-CO2-201_311323	-0.5211	0.0245	0.7671
RNY1P12-201_48006	-0.8037	0.0242	0.7687
hsa-mir-144_17506	1.1324	0.0241	0.769
hsa-mir-186_60176	0.264	0.024	0.7694
hsa-mir-150_82508	2.1027	0.024	0.7695
hsa-let-7e_138736	-1.9475	0.024	0.7693
hsa-mir-328_223924	1.3577	0.0239	0.77
hsa-mir-223_109179	-0.7837	0.0237	0.7711
hsa-mir-9-2_236307	0.3963	0.0234	0.7725
hsa-mir-151a_243933	29.5244	0.0234	0.7721
hsa-mir-328_357042	-20.6139	0.0233	0.7728
hsa-mir-574_129526	1.8986	0.0232	0.7734
RP3-481F12.6-001_279623	1.9839	0.0232	0.7732
hsa-mir-30e_292627	-4.5332	0.0232	0.7734
hsa-mir-151a_386534	-18.988	0.0231	0.774
hsa-mir-486-2_34632	1.8617	0.023	0.7741
hsa-mir-486-2_113120	3.9459	0.023	0.774
hsa-mir-374a_181660	3.1432	0.0228	0.7754
hsa-mir-29a_127262	-0.8411	0.0227	0.7755
RNY4-201_313815	0.4171	0.0226	0.7764
hsa-mir-181a-2_149021	-2.4657	0.0225	0.7769
hsa-mir-199a-1_192709	-5.3787	0.0224	0.7772
hsa-mir-92a-1_43606	3.3371	0.0221	0.7785
hsa-mir-28_3921	-1.0332	0.022	0.7791
hsa-mir-301a_11813	-0.7897	0.022	0.7789
hsa-mir-148a_24725	-1.7886	0.022	0.7792
hsa-mir-16-2_323337	3.1994	0.022	0.779
hsa-mir-328_355682	-2.9845	0.0218	0.7801
hsa-mir-654_172269	1.6987	0.0217	0.7808
hsa-mir-30e_242937	4.7613	0.0217	0.7807
ENST00000500358.6_271709	1.049	0.0216	0.781
hsa-mir-1843_254490	2.3422	0.0215	0.7817
hsa-mir-3184_59600	5.4649	0.0214	0.7824
tRNA-Gly-GCC-3-1_27631	-0.7627	0.0213	0.7826
hsa-mir-486-2_215223	2108.89	0.0213	0.7828
hsa-mir-21_101079	0.3353	0.0212	0.783
hsa-mir-3184_124277	10.4068	0.0212	0.783
hsa-mir-223_228315	-1.1196	0.0212	0.7833
RNY4P10-201_170392	2.8856	0.021	0.784
hsa-mir-106b_388159	1.4082	0.0208	0.7851
ENST00000445125.2_222815	1.0729	0.0206	0.7864
hsa-mir-146a_243769	0.9501	0.0204	0.7874
hsa-mir-93_369791	-1.1539	0.0204	0.7873
hsa-let-7d_86986	-0.1247	0.0203	0.7876
hsa-mir-361_156314	1.5058	0.02	0.7892
RNY4P7-201_107132	-2.6086	0.0199	0.79
hsa-mir-584_32146	0.3535	0.0197	0.7909
hsa-mir-320a_335006	-0.3919	0.0195	0.7917
hsa-mir-29c_188400	3.0177	0.0193	0.7929
RP11-846F4.3-001_245475	0.2454	0.0193	0.7929
hsa-let-7a-1_247503	3.5237	0.0193	0.793
hsa-mir-1246_279549	2.0886	0.0193	0.7929
RP3-481F12.6-001_388160	-0.5287	0.0193	0.7928
hsa-mir-16-2_23043	1.2948	0.0192	0.7933
hsa-mir-484_221571	-0.7538	0.0191	0.794
tRNA-Val-CAC-5-1_194119	-0.3607	0.019	0.7944
hsa-let-7b_217805	0.2927	0.019	0.7946
hsa-mir-223_31837	0.3968	0.0189	0.7952
hsa-mir-223_128809	0.4354	0.0188	0.7958
hsa-mir-150_182892	53.991	0.0188	0.7957
hsa-mir-126_263440	0.167	0.0188	0.7958
hsa-mir-339_346375	0.4427	0.0186	0.7967
hsa-let-7b_77010	0.2514	0.0185	0.7972
RNY4-201_269696	0.357	0.0185	0.7973
hsa-mir-30e_66287	0.5466	0.0183	0.7984
hsa-let-7f-2_57046	1.5133	0.0178	0.8013
hsa-mir-19b-2_96985	2.5974	0.0178	0.8011
hsa-mir-223_97535	-3.3281	0.0177	0.8018
hsa-mir-584_112832	1.0483	0.0177	0.8017
hsa-mir-126_178477	6.5615	0.0177	0.8014
hsa-mir-152_178998	0.5751	0.0177	0.8018
hsa-mir-377_253995	-0.3155	0.0176	0.8022
hsa-mir-320a_125173	-0.2621	0.0175	0.8025
hsa-mir-222_205827	-11.6407	0.0175	0.8026
RNY4P16-201_40364	-0.2631	0.0174	0.8032
hsa-mir-26a-2_238533	2.29	0.0172	0.8044
hsa-mir-145_275045	-0.5403	0.0172	0.8044
hsa-mir-107_365784	-1.0553	0.0171	0.805
hsa-mir-223_34804	-0.3605	0.017	0.8057
hsa-mir-486-2_44982	0.9002	0.017	0.8055
hsa-mir-451b_95918	0.8442	0.0168	0.8067
RNY4P10-201_233437	3.1755	0.0168	0.8068
hsa-mir-330_285466	2.138	0.0167	0.807
hsa-mir-21_245837	1.6422	0.0166	0.8079
hsa-mir-143_256394	-15.8392	0.0165	0.8082
hsa-let-7f-2_2448	0.2568	0.0164	0.8089
hsa-mir-148b_89366	-1.9664	0.0164	0.8088
hsa-mir-3184_165903	-0.3948	0.0164	0.8087
hsa-let-7b_170761	0.781	0.0164	0.809
ENST00000416946.1_272024	-5.337	0.0164	0.8091
hsa-mir-107_1886	0.41	0.0162	0.8103
hsa-mir-26a-2_126919	0.5357	0.0162	0.8102
hsa_piR_015249|gb|DQ590830|Homo_sapiens_2062	-0.6027	0.0161	0.8105
hsa-mir-92a-1_15745	-0.4043	0.0161	0.8108
hsa_piR_016658|gb|DQ592931|Homo_sapiens_18870	-0.6027	0.0161	0.8105
hsa_piR_020326|gb|DQ597916|Homo_sapiens_29076	-0.6027	0.0161	0.8105
hsa_piR_016659|gb|DQ592932|Homo_sapiens_29462	-0.6027	0.0161	0.8105
hsa-mir-28_53011	0.4181	0.0161	0.8105
hsa_piR_020485|gb|DQ598159|Homo_sapiens_53759	-0.6027	0.0161	0.8105
hsa_piR_020009|gb|DQ597484|Homo_sapiens_83146	-0.6027	0.0161	0.8105
hsa_piR_020009|gb|DQ597484|Homo_sapiens_93225	-0.6027	0.0161	0.8105
hsa_piR_019951|gb|DQ597403|Homo_sapiens_94333	-0.6027	0.0161	0.8105
hsa_piR_020009|gb|DQ597484|Homo_sapiens_102954	-0.6027	0.0161	0.8105
hsa_piR_020326|gb|DQ597916|Homo_sapiens_108419	-0.6027	0.0161	0.8105
hsa_piR_015249|gb|DQ590830|Homo_sapiens_121389	-0.6027	0.0161	0.8105
hsa_piR_000291|gb|DQ570344|Homo_sapiens_138454	-0.6027	0.0161	0.8105
hsa_piR_020009|gb|DQ597484|Homo_sapiens_143633	-0.6027	0.0161	0.8105
hsa_piR_020009|gb|DQ597484|Homo_sapiens_150226	-0.6027	0.0161	0.8105
hsa_piR_017723|gb|DQ594464|Homo_sapiens_151756	-0.6027	0.0161	0.8105
hsa_piR_020009|gb|DQ597484|Homo_sapiens_153774	-0.6027	0.0161	0.8105
hsa_piR_020009|gb|DQ597484|Homo_sapiens_168662	-0.6027	0.0161	0.8105
hsa_piR_016659|gb|DQ592932|Homo_sapiens_197917	-0.6027	0.0161	0.8105
hsa_piR_020326|gb|DQ597916|Homo_sapiens_204024	-0.6027	0.0161	0.8105
hsa_piR_020326|gb|DQ597916|Homo_sapiens_204722	-0.6027	0.0161	0.8105
hsa_piR_000823|gb|DQ571031|Homo_sapiens_235697	-0.6027	0.0161	0.8105
hsa_piR_016659|gb|DQ592932|Homo_sapiens_250620	-0.6027	0.0161	0.8105
hsa_piR_016658|gb|DQ592931|Homo_sapiens_267799	-0.6027	0.0161	0.8105
hsa_piR_018570|gb|DQ595536|Homo_sapiens_271091	-0.6027	0.0161	0.8105
hsa_piR_016659|gb|DQ592932|Homo_sapiens_314449	-0.6027	0.0161	0.8105
hsa-let-7g_337851	-0.3584	0.0161	0.8104
hsa_piR_020829|gb|DQ598677|Homo_sapiens_342976	-0.6027	0.0161	0.8105
hsa_piR_020326|gb|DQ597916|Homo_sapiens_347193	-0.6027	0.0161	0.8105
hsa_piR_020009|gb|DQ597484|Homo_sapiens_370042	-0.6027	0.0161	0.8105
hsa_piR_000823|gb|DQ571031|Homo_sapiens_370925	-0.6027	0.0161	0.8105
hsa_piR_020485|gb|DQ598159|Homo_sapiens_374276	-0.6027	0.0161	0.8105
hsa-mir-21_103433	0.1737	0.016	0.8114
hsa-mir-15a_225925	9.155	0.016	0.8112
hsa-let-7i_57189	11.1612	0.0159	0.8121
hsa-let-7a-3_141075	-0.6969	0.0159	0.8118
hsa-mir-378a_187591	0.8986	0.0159	0.812
hsa-mir-26a-2_366141	-0.361	0.0158	0.8126
hsa-mir-30e_154743	-0.5612	0.0156	0.8137
hsa-mir-625_314987	0.348	0.0156	0.8137
RP11-215L17.2-001_64654	-0.4286	0.0155	0.8143
hsa-mir-3615_83212	-5.1927	0.0155	0.8143
hsa-mir-451b_328069	-0.8799	0.0153	0.8155
RP11-18O13.1-004_368666	0.6611	0.0153	0.8153
hsa-mir-26a-2_70181	-1.3977	0.0152	0.8159
hsa-mir-320a_194039	-0.2825	0.0152	0.8159
RP3-481F12.6-001_351854	2.0166	0.0152	0.8159
hsa-mir-223_11016	-163.298	0.0151	0.8163
hsa-mir-4433a_50904	5.8027	0.0151	0.8166
hsa-mir-155_119940	0.7013	0.015	0.8172
hsa-mir-425_146815	-0.5815	0.0149	0.8176
hsa-mir-3184_183763	-42.876	0.0149	0.8176
hsa-mir-146b_255464	0.4064	0.0145	0.8205
hsa-let-7a-2_25678	0.8439	0.0144	0.8209
hsa-mir-221_98005	-1.0089	0.0144	0.8211
hsa-mir-30d_143223	-54.1581	0.0144	0.8207
hsa-let-7f-2_321301	680.44	0.0144	0.8208
RP11-645N11.2-002_5102	0.4866	0.0143	0.8212
hsa-let-7b_77688	-4.7057	0.0143	0.8213
hsa-mir-30d_310054	0.2732	0.0143	0.8217
tRNA-Gly-TCC-1-1_189681	0.7156	0.0142	0.8219
hsa-mir-374a_253183	1.5071	0.0142	0.8224
hsa-mir-376a-1_268398	0.2492	0.0142	0.822
RP11-203J14.1-001_324339	0.4562	0.0141	0.823
hsa-mir-454_343771	1.0824	0.0141	0.823
ENST00000387342.1_389070	1.0567	0.014	0.8231
hsa-mir-16-2_201841	1.126	0.0139	0.8237
hsa-mir-3615_311421	2.5235	0.0139	0.824
hsa-mir-432_311807	0.4479	0.0136	0.826
hsa-mir-19b-2_20559	0.3757	0.0135	0.8265
hsa-let-7b_291732	-0.1021	0.0135	0.8266
hsa-mir-199a-1_246823	7.6299	0.0133	0.8277
tRNA-Leu-TAG-1-1_361255	-0.1678	0.0133	0.8276
hsa-mir-186_122545	-0.97	0.0132	0.8287
ENST00000387342.1_241888	-1.6231	0.0132	0.8287
hsa-mir-25_332432	3.3548	0.0132	0.8287
hsa-mir-335_375304	-0.1819	0.0132	0.8285
hsa-mir-130b_154977	0.4117	0.0131	0.8292
hsa-mir-29a_350967	1.0551	0.0131	0.8288
hsa-mir-142_25802	-5.4107	0.013	0.8297
ENST00000384478.1_23036	-0.7625	0.0129	0.8303
hsa-mir-4433a_103896	1.7442	0.0128	0.8313
hsa-mir-28_173944	-0.4944	0.0128	0.8309
hsa-mir-93_16140	-1.1201	0.0127	0.8316
hsa-mir-222_189672	-1.8779	0.0125	0.833
hsa-mir-223_190385	-0.6453	0.0125	0.833
hsa-mir-486-2_197874	1.5469	0.0125	0.8331
hsa-let-7a-1_257860	-2.0897	0.0124	0.8336
RNY4P14-201_285430	0.5804	0.0124	0.8336
hsa-mir-92a-1_177768	1.5568	0.0122	0.8347
RP11-846F4.3-001_278470	-0.9198	0.0121	0.8358
RP11-752G15.5-002_342140	0.3479	0.0121	0.8359
hsa-mir-30d_356678	0.3728	0.0121	0.8355
hsa-mir-126_384889	-0.1562	0.0121	0.8357
hsa-mir-146a_69461	1.6776	0.012	0.8361
RNY4-201_101633	1.9073	0.012	0.8362
hsa-mir-7-1_221672	-1.5113	0.012	0.8364
hsa-mir-148b_281631	-0.9232	0.012	0.8363
[truncated: 372 more rows]
