# Supplementary figures and images for: Small RNA Changes in Plasma Have Potential for Early Diagnosis of Alzheimer’s Disease before Symptom Onset
Source: MDPI journal article supplement (doi:10.3390/cells13030207), 2024-01-23

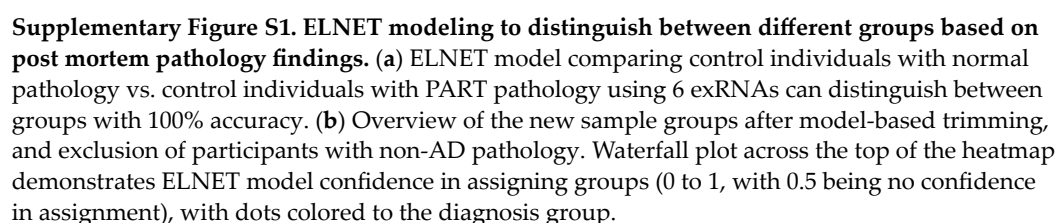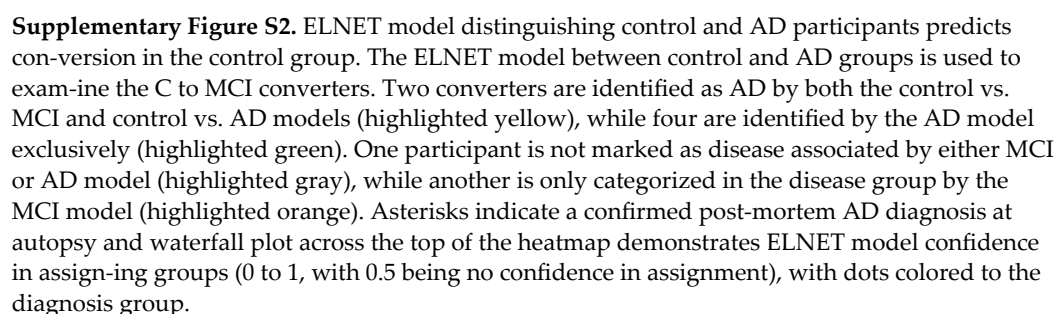

Supplement: s1 [file s1]
